# Supplementary material for: Plant–necrotroph co-transcriptome networks illuminate a metabolic battlefield
Source: eLife. 2019 May 13;8:e44279. doi: 10.7554/eLife.44279 (PMC6557632; doi:10.7554/eLife.44279)
Supplement: Figure 1—source data 1. — B. cinerea biomass of 96 isolates infection on Arabidopsis genotypes was estimated using the fraction of uniquely mapped reads against B05.10 reference genome. Three Arabidopsis genotypes are wild-type Col-0, jasmonate insensitive mutant coi1-1, and salicylic acid insensitive mutant npr1-1. [file elife-44279-fig1-data1.xlsx]

## Sheet: F1_SD1_EstimatedFungalBiomass
Figure 1-source data 1. Model-corrected means of estimated B. cinerea biomass. B. cinerea biomass of 96 isolates infection on Arabidopsis genotypes was estimated using the fraction of uniquely mapped reads against B05.10 reference genome. Three Arabidopsis genotypes are wild-type Col-0, jasmonate insensitive mutant coi1-1, and salicylic acid insensitive mutant npr1-1.
Host Genotype	Isolate	Index	B. cinerea Transcript Fraction (%)	Fra.SE
coi1-1	1.01.01	1	11.2856	5.96111
coi1-1	1.01.02	2	7.14922	5.96111
coi1-1	1.01.03	3	12.4716	5.96111
coi1-1	1.01.04	4	12.1255	5.96111
coi1-1	1.01.06	5	11.1139	5.96111
coi1-1	1.01.15	6	3.19731	5.96111
coi1-1	1.02.01	7	11.1468	5.96111
coi1-1	1.02.02	8	11.5185	5.96111
coi1-1	1.02.03	9	9.45493	5.96111
coi1-1	1.02.04	10	9.16191	5.96111
coi1-1	1.02.06	11	9.21405	5.96111
coi1-1	1.02.13	12	13.8863	5.96111
coi1-1	1.02.15	13	18.5276	5.96111
coi1-1	1.02.16	14	7.32855	5.96111
coi1-1	1.02.17	15	9.01113	5.96111
coi1-1	1.02.18	16	11.2667	5.96111
coi1-1	1.02.19	17	9.16659	5.96111
coi1-1	1.02.20	18	11.3325	5.96111
coi1-1	1.03.02	19	11.2287	5.96111
coi1-1	1.03.04	20	18.7118	5.96111
coi1-1	1.03.12	21	19.6661	5.96111
coi1-1	1.03.16	22	14.6546	5.96111
coi1-1	1.03.18	23	14.1988	5.96111
coi1-1	1.03.19	24	13.6566	5.96111
coi1-1	1.03.20	25	32.5158	5.96111
coi1-1	1.03.22	26	14.1667	5.96111
coi1-1	1.03.23	27	16.3808	5.96111
coi1-1	1.04.01	28	15.6364	5.96111
coi1-1	1.04.02	29	5.88648	5.96111
coi1-1	1.04.03	30	22.3187	5.96111
coi1-1	1.04.04	31	8.52908	5.96111
coi1-1	1.04.05	32	20.0693	5.96111
coi1-1	1.04.12	33	13.5643	5.96111
coi1-1	1.04.15	34	18.0918	5.96111
coi1-1	1.04.17	35	18.3608	5.96111
coi1-1	1.04.19	36	13.9963	5.96111
coi1-1	1.04.20	37	26.3712	5.96111
coi1-1	1.04.21	38	17.4406	5.96111
coi1-1	1.04.25	39	9.76833	5.96111
coi1-1	1.05.04	40	14.3543	5.96111
coi1-1	1.05.11	41	9.0375	5.96111
coi1-1	1.05.14	42	7.53361	5.96111
coi1-1	1.05.17	43	17.8344	5.96111
coi1-1	1.05.22	44	14.4934	5.96111
coi1-1	1.05.24	45	8.03535	5.96111
coi1-1	2.04.03	46	15.7971	5.96111
coi1-1	2.04.04	47	15.228	5.96111
coi1-1	2.04.08	48	18.8874	5.96111
coi1-1	2.04.09	49	14.645	5.96111
coi1-1	2.04.11	50	10.8849	5.96111
coi1-1	2.04.12	51	17.7676	5.96111
coi1-1	2.04.14	52	15.574	5.96111
coi1-1	2.04.17	53	19.0482	5.96111
coi1-1	2.04.18	54	10.2333	5.96111
coi1-1	2.04.20	55	18.5936	5.96111
coi1-1	2.04.21	56	15.4039	5.96111
coi1-1	Acacia	57	10.3742	5.96111
coi1-1	Apple 404	58	15.0375	5.96111
coi1-1	Apple 517	59	26.1097	5.96111
coi1-1	Ausubel	60	9.99574	5.96111
coi1-1	B05.10	61	21.3244	5.96111
coi1-1	BMM	62	14.8317	5.96111
coi1-1	BPA 1	63	17.6998	5.96111
coi1-1	Davis Navel	64	13.661	5.96111
coi1-1	Esparato Fresa	65	16.9153	5.96111
coi1-1	Fd1	66	16.5015	5.96111
coi1-1	Fd2	67	27.9772	5.96111
coi1-1	Fresa 525	68	9.52008	5.96111
coi1-1	Fresa S.D.	69	9.82054	5.96111
coi1-1	Gallo 1	70	16.3251	5.96111
coi1-1	Gallo 2	71	4.39448	5.96111
coi1-1	Geranium	72	12.2948	5.96111
coi1-1	Grape	73	20.6199	5.96111
coi1-1	Katie tomato	74	10.3041	5.96111
coi1-1	Kern A2	75	12.0392	5.96111
coi1-1	Kern B1	76	27.0549	5.96111
coi1-1	Kern B2	77	18.776	5.96111
coi1-1	KGB1	78	32.2424	5.96111
coi1-1	KGB2	79	14.5314	5.96111
coi1-1	MEA.P6G	80	22.1473	5.96111
coi1-1	Mex-03	81	18.6521	5.96111
coi1-1	Molly	82	13.4115	5.96111
coi1-1	Navel	83	13.6977	5.96111
coi1-1	Noble Rot	84	11.6732	5.96111
coi1-1	Peachy	85	4.35661	5.96111
coi1-1	Pepper	86	20.1486	5.96111
coi1-1	Pepper sub	87	15.3564	5.96111
coi1-1	Philo Menlo	88	4.51003	5.96111
coi1-1	Rasp	89	9.71222	5.96111
coi1-1	Rose (83-2)	90	17.9376	5.96111
coi1-1	Supersteak	91	9.43665	5.96111
coi1-1	Triple 3 (T3)	92	11.3583	5.96111
coi1-1	Triple 7 (T7)	93	10.1237	5.96111
coi1-1	UK razz	94	17.2814	5.96111
coi1-1	94.4	95	29.7549	5.96111
coi1-1	1.05.16	97	11.8066	5.96111
Col-0	1.01.01	1	8.45862	5.96111
Col-0	1.01.02	2	10.1875	5.96111
Col-0	1.01.03	3	8.94654	5.96111
Col-0	1.01.04	4	10.2274	5.96111
Col-0	1.01.06	5	9.96824	5.96111
Col-0	1.01.15	6	2.73152	5.96111
Col-0	1.02.01	7	10.5961	5.96111
Col-0	1.02.02	8	15.2668	5.96111
Col-0	1.02.03	9	10.9654	5.96111
Col-0	1.02.04	10	9.44998	5.96111
Col-0	1.02.06	11	7.28676	5.96111
Col-0	1.02.13	12	8.18365	5.96111
Col-0	1.02.15	13	7.83043	5.96111
Col-0	1.02.16	14	7.11572	5.96111
Col-0	1.02.17	15	7.06441	5.96111
Col-0	1.02.18	16	10.1079	5.96111
Col-0	1.02.19	17	5.61713	5.96111
Col-0	1.02.20	18	9.16136	5.96111
Col-0	1.03.02	19	7.18912	5.96111
Col-0	1.03.04	20	9.84821	5.96111
Col-0	1.03.12	21	8.1616	5.96111
Col-0	1.03.16	22	8.92217	5.96111
Col-0	1.03.18	23	10.275	5.96111
Col-0	1.03.19	24	5.24247	5.96111
Col-0	1.03.20	25	6.33531	5.96111
Col-0	1.03.22	26	6.39846	5.96111
Col-0	1.03.23	27	3.26624	5.96111
Col-0	1.04.01	28	11.5112	5.96111
Col-0	1.04.02	29	2.45169	5.96111
Col-0	1.04.03	30	8.31695	5.96111
Col-0	1.04.04	31	4.76872	5.96111
Col-0	1.04.05	32	12.4564	5.96111
Col-0	1.04.12	33	7.06992	5.96111
Col-0	1.04.15	34	6.69568	5.96111
Col-0	1.04.17	35	7.7559	5.96111
Col-0	1.04.19	36	9.08179	5.96111
Col-0	1.04.20	37	9.02883	5.96111
Col-0	1.04.21	38	8.14241	5.96111
Col-0	1.04.25	39	9.3143	5.96111
Col-0	1.05.04	40	9.71916	5.96111
Col-0	1.05.11	41	6.34991	5.96111
Col-0	1.05.14	42	7.33852	5.96111
Col-0	1.05.17	43	8.74801	5.96111
Col-0	1.05.22	44	11.8549	5.96111
Col-0	1.05.24	45	5.95032	5.96111
Col-0	2.04.03	46	7.55529	5.96111
Col-0	2.04.04	47	10.751	5.96111
Col-0	2.04.08	48	8.93102	5.96111
Col-0	2.04.09	49	5.32687	5.96111
Col-0	2.04.11	50	3.56749	5.96111
Col-0	2.04.12	51	15.8346	5.96111
Col-0	2.04.14	52	9.7679	5.96111
Col-0	2.04.17	53	10.9708	5.96111
Col-0	2.04.18	54	6.46941	5.96111
Col-0	2.04.20	55	25.9445	5.96111
Col-0	2.04.21	56	9.27604	5.96111
Col-0	Acacia	57	10.703	5.96111
Col-0	Apple 404	58	10.7427	5.96111
Col-0	Apple 517	59	11.0312	5.96111
Col-0	Ausubel	60	4.92162	5.96111
Col-0	B05.10	61	11.1899	5.96111
Col-0	BMM	62	9.97047	5.96111
Col-0	BPA 1	63	7.80557	5.96111
Col-0	Davis Navel	64	11.9601	5.96111
Col-0	Esparato Fresa	65	9.01651	5.96111
Col-0	Fd1	66	12.3844	5.96111
Col-0	Fd2	67	7.59287	5.96111
Col-0	Fresa 525	68	10.7962	5.96111
Col-0	Fresa S.D.	69	13.8648	5.96111
Col-0	Gallo 1	70	8.24531	5.96111
Col-0	Gallo 2	71	3.13422	5.96111
Col-0	Geranium	72	9.92047	5.96111
Col-0	Grape	73	7.53388	5.96111
Col-0	Katie tomato	74	10.9102	5.96111
Col-0	Kern A2	75	7.22698	5.96111
Col-0	Kern B1	76	11.7263	5.96111
Col-0	Kern B2	77	7.7043	5.96111
Col-0	KGB1	78	10.685	5.96111
Col-0	KGB2	79	9.93674	5.96111
Col-0	MEA.P6G	80	5.85294	5.96111
Col-0	Mex-03	81	15.8034	5.96111
Col-0	Molly	82	8.23461	5.96111
Col-0	Navel	83	8.76859	5.96111
Col-0	Noble Rot	84	10.3878	5.96111
Col-0	Peachy	85	6.05963	5.96111
Col-0	Pepper	86	13.8461	5.96111
Col-0	Pepper sub	87	7.74177	5.96111
Col-0	Philo Menlo	88	8.64735	5.96111
Col-0	Rasp	89	8.1729	5.96111
Col-0	Rose (83-2)	90	13.7308	5.96111
Col-0	Supersteak	91	5.7561	5.96111
Col-0	Triple 3 (T3)	92	11.3324	5.96111
Col-0	Triple 7 (T7)	93	8.26751	5.96111
Col-0	UK razz	94	14.5148	5.96111
Col-0	94.4	95	6.82681	5.96111
Col-0	1.05.16	97	15.4449	6.88329
npr1-1	1.01.01	1	15.9232	5.96111
npr1-1	1.01.02	2	18.174	5.96111
npr1-1	1.01.03	3	23.3466	5.96111
npr1-1	1.01.04	4	16.1222	5.96111
npr1-1	1.01.06	5	10.5505	5.96111
npr1-1	1.01.15	6	2.33425	5.96111
npr1-1	1.02.01	7	23.9384	5.96111
npr1-1	1.02.02	8	26.1912	5.96111
npr1-1	1.02.03	9	18.2662	5.96111
npr1-1	1.02.04	10	17.1107	5.96111
npr1-1	1.02.06	11	13.6919	5.96111
npr1-1	1.02.13	12	14.8058	5.96111
npr1-1	1.02.15	13	14.5048	5.96111
npr1-1	1.02.16	14	5.96855	5.96111
npr1-1	1.02.17	15	12.41	5.96111
npr1-1	1.02.18	16	8.2937	5.96111
npr1-1	1.02.19	17	10.2731	5.96111
npr1-1	1.02.20	18	12.6439	5.96111
npr1-1	1.03.02	19	8.80799	5.96111
npr1-1	1.03.04	20	14.5228	5.96111
npr1-1	1.03.12	21	25.8082	5.96111
npr1-1	1.03.16	22	9.43166	5.96111
npr1-1	1.03.18	23	25.8849	5.96111
npr1-1	1.03.19	24	24.4625	5.96111
npr1-1	1.03.20	25	24.3144	5.96111
npr1-1	1.03.22	26	18.408	5.96111
npr1-1	1.03.23	27	22.4452	5.96111
npr1-1	1.04.01	28	18.4319	5.96111
npr1-1	1.04.02	29	13.6313	5.96111
npr1-1	1.04.03	30	21.6756	5.96111
npr1-1	1.04.04	31	9.75086	5.96111
npr1-1	1.04.05	32	18.5422	5.96111
npr1-1	1.04.12	33	22.8861	5.96111
npr1-1	1.04.15	34	15.1779	5.96111
npr1-1	1.04.17	35	25.7675	5.96111
npr1-1	1.04.19	36	24.3303	5.96111
npr1-1	1.04.20	37	19.7128	5.96111
npr1-1	1.04.21	38	23.8496	5.96111
npr1-1	1.04.25	39	14.2154	5.96111
npr1-1	1.05.04	40	18.1503	5.96111
npr1-1	1.05.11	41	15.2951	5.96111
npr1-1	1.05.14	42	15.8903	5.96111
npr1-1	1.05.17	43	19.6973	5.96111
npr1-1	1.05.22	44	15.7765	5.96111
npr1-1	1.05.24	45	8.66629	5.96111
npr1-1	2.04.03	46	23.1977	5.96111
npr1-1	2.04.04	47	23.7672	5.96111
npr1-1	2.04.08	48	15.0337	5.96111
npr1-1	2.04.09	49	12.6424	5.96111
npr1-1	2.04.11	50	23.1039	5.96111
npr1-1	2.04.12	51	14.0222	5.96111
npr1-1	2.04.14	52	14.3152	5.96111
npr1-1	2.04.17	53	20.6551	5.96111
npr1-1	2.04.18	54	13.2894	5.96111
npr1-1	2.04.20	55	12.0798	5.96111
npr1-1	2.04.21	56	15.3245	5.96111
npr1-1	Acacia	57	17.5078	5.96111
npr1-1	Apple 404	58	16.7899	5.96111
npr1-1	Apple 517	59	21.428	5.96111
npr1-1	Ausubel	60	6.86604	5.96111
npr1-1	B05.10	61	14.8849	5.96111
npr1-1	BMM	62	13.3382	5.96111
npr1-1	BPA 1	63	13.4447	5.96111
npr1-1	Davis Navel	64	18.2367	5.96111
npr1-1	Esparato Fresa	65	15.3971	5.96111
npr1-1	Fd1	66	15.9956	5.96111
npr1-1	Fd2	67	26.5704	5.96111
npr1-1	Fresa 525	68	15.2659	5.96111
npr1-1	Fresa S.D.	69	12.6842	5.96111
npr1-1	Gallo 1	70	8.72116	5.96111
npr1-1	Gallo 2	71	3.70378	5.96111
npr1-1	Geranium	72	16.1799	5.96111
npr1-1	Grape	73	22.207	5.96111
npr1-1	Katie tomato	74	27.9857	5.96111
npr1-1	Kern A2	75	4.01963	5.96111
npr1-1	Kern B1	76	18.927	5.96111
npr1-1	Kern B2	77	13.2649	5.96111
npr1-1	KGB1	78	17.1731	5.96111
npr1-1	KGB2	79	16.9661	5.96111
npr1-1	MEA.P6G	80	18.7747	5.96111
npr1-1	Mex-03	81	20.4659	5.96111
npr1-1	Molly	82	8.99956	5.96111
npr1-1	Navel	83	21.6548	5.96111
npr1-1	Noble Rot	84	15.3069	5.96111
npr1-1	Peachy	85	7.92544	5.96111
npr1-1	Pepper	86	19.3937	5.96111
npr1-1	Pepper sub	87	19.8427	5.96111
npr1-1	Philo Menlo	88	3.56472	5.96111
npr1-1	Rasp	89	14.937	5.96111
npr1-1	Rose (83-2)	90	17.5053	5.96111
npr1-1	Supersteak	91	8.85608	5.96111
npr1-1	Triple 3 (T3)	92	15.2816	5.96111
npr1-1	Triple 7 (T7)	93	11.8114	5.96111
npr1-1	UK razz	94	15.5704	5.96111
npr1-1	94.4	95	8.52284	5.96111
npr1-1	1.05.16	97	14.4244	5.96111
