# Supplementary material for: Plant–necrotroph co-transcriptome networks illuminate a metabolic battlefield
Source: eLife. 2019 May 13;8:e44279. doi: 10.7554/eLife.44279 (PMC6557632; doi:10.7554/eLife.44279)
Supplement: Figure 2—source data 4. — Broad-sense heritability (H2) of individual B. cinerea transcript contributed by pathogen, host and their interaction were estimated. Three Arabidopsis genotypes are wild-type Col-0, jasmonate insensitive mutant coi1-1, and salicylic acid insensitive mutant npr1-1. [file elife-44279-fig2-data4.xlsx]

## Sheet: F2_SD4_TopHeri
Figure 2-source data 4. Top 100 heritability of B. cinerea transcripts. Broad-sense heritability (H2) of individual B. cinerea transcript contributed by pathogen, host and their interaction were estimated. Three Arabidopsis genotypes are wild-type Col-0, jasmonate insensitive mutant coi1-1, and salicylic acid insensitive mutant npr1-1.
Gene ID	Heritability (H2)	P-Value	Description	GO
Heritability to Isolate
Bcin04g03940.1	0.460035	1.33e-195	hypothetical protein BC1G_04116	F:oxidoreductase activity; P:oxidation-reduction process
Bcin09g00820.1	0.459211	0	glutathione-s-transferase gst	F:transferase activity
Bcin09g00860.1	0.450664	0	glutathione-dependent formaldehyde-activating GFA [Botrytis cinerea T4]	F:carbon-sulfur lyase activity; P:metabolic process
Bcin09g00850.1	0.446695	0	zinc-binding alcohol dehydrogenase	F:zinc ion binding; F:oxidoreductase activity; P:oxidation-reduction process
Bcin10g00140.1	0.442216	0	Short-chain dehydrogenase reductase SDR	F:oxidoreductase activity; P:oxidation-reduction process
Bcin01g03890.1	0.435704	0	hypothetical protein IQ06DRAFT_293598	no GO terms
Bcin16g04530.1	0.430423	2.45e-199	RNAse III [Botrytis cinerea T4]	P:RNA phosphodiester bond hydrolysis, endonucleolytic; F:RNA binding; F:ribonuclease III activity; P:RNA processing
Bcin12g01010.1	0.426406	0	hypothetical protein sscle_10g075550	no GO terms
Bcin14g00240.1	0.426317	7.78e-295	hypothetical protein BC1G_13815	no GO terms
Bcin09g07130.1	0.425535	0	hypothetical protein BcDW1_7861	no IPS match
Bcin06g00010.1	0.425258	5.47e-60	hypothetical protein OIDMADRAFT_44029	no GO terms
Bcin10g00030.1	0.423611	0	dimeric alpha-beta barrel [Botrytis cinerea 1]	no GO terms
Bcin10g00150.1	0.423587	3.92e-103	chlorohydrolase family	F:hydrolase activity, acting on carbon-nitrogen (but not peptide) bonds
Bcin09g00830.1	0.417094	0	hypothetical protein BC1G_15499	F:protein binding
Bcin10g02020.1	0.415044	4.93e-152	hypothetical protein BC1G_14806 [Botrytis cinerea B05.10]	P:protein homooligomerization
Bcin10g00020.1	0.412856	1.21e-76	hypothetical protein ANO14919_031320	P:transmembrane transport; C:integral component of membrane
Bcin07g04990.1	0.41201	3.83e-118	4 [Botrytis cinerea T4]	F:oxidoreductase activity; P:oxidation-reduction process
Bcin04g03950.1	0.41161	1.8e-52	major facilitator superfamily transporter [Botrytis cinerea 1]	P:transmembrane transport; C:integral component of membrane
Bcin10g00010.1	0.40993	1.9e-114	hypothetical protein GQ26_0170660	C:integral component of membrane
Bcin14g03270.1	0.409093	0	hypothetical protein BC1G_10089	no GO terms
Bcin16g04490.1	0.407608	2.04e-237	hypothetical protein BofuT4_P151350.1	P:RNA phosphodiester bond hydrolysis, endonucleolytic; F:ribonuclease III activity; P:RNA phosphodiester bond hydrolysis; F:RNA binding; P:RNA processing
Bcin05g00008.1	0.406935	0	predicted protein	no GO terms
Bcin09g04140.1	0.406604	0	hypothetical protein BofuT4_P056250.1	no GO terms
Bcin08g05350.1	0.400078	0	deoxyribose-phosphate aldolase	F:deoxyribose-phosphate aldolase activity; C:cytoplasm; F:catalytic activity; P:deoxyribonucleotide catabolic process; F:lyase activity
Bcin14g05180.1	0.399608	5.01e-62	predicted protein	no GO terms
Bcin02g03480.1	0.398354	2.44e-302	alpha beta hydrolase fold	P:metabolic process; F:hydrolase activity
Bcin05g05300.1	0.398354	5.42e-273	hypothetical protein BofuT4_P136260.1	no GO terms
Bcin01g02470.1	0.395729	0	tannase subunit [Botrytis cinerea 1]	F:molecular_function
Bcin09g07140.1	0.395034	0	hypothetical protein BcDW1_7862	C:membrane; C:integral component of membrane
Bcin01g00160.1	0.393623	0	17 [Botrytis cinerea ]	no GO terms
Bcin01g03910.2	0.393481	1.89e-139	hypothetical protein IQ06DRAFT_220568	no GO terms
Bcin01g03900.1	0.391309	1.23e-186	predicted protein	no GO terms
Bcin01g10150.1	0.3913	0	phosphatidylserine decarboxylase [Botrytis cinerea T4]	F:phosphatidylserine decarboxylase activity; P:phospholipid biosynthetic process
Bcin09g06320.1	0.390466	0	hypothetical protein BcDW1_548	no GO terms
Bcin01g04540.1	0.390227	0	G -coupled receptor : Microbial opsin [Botrytis cinerea T4]	F:ion channel activity; P:ion transport; P:ion transmembrane transport; C:membrane; C:integral component of membrane
Bcin01g08580.1	0.388147	0		no GO terms
Bcin01g03910.1	0.388047	6.6e-172	predicted protein	no GO terms
Bcin01g01460.1	0.385352	0	hypothetical protein BcDW1_1384	no GO terms
Bcin12g04900.1	0.383532	3.08e-196	salicylate 1-monooxygenase [Botrytis cinerea T4]	F:FAD binding; P:oxidation-reduction process; F:monooxygenase activity
Bcin02g00007.1	0.381373	0	hypothetical protein BcDW1_653	no GO terms
Bcin15g00290.1	0.378812	2.4e-104	hypothetical protein BofuT4_P024150.1 [Botrytis cinerea T4]	no GO terms
Bcin16g01590.1	0.377401	9.12e-128	glycoside hydrolase family 18 [Botrytis cinerea T4]	P:carbohydrate metabolic process; C:extracellular region; F:hydrolase activity, hydrolyzing O-glycosyl compounds; F:cellulose binding
Bcin12g01960.1	0.377196	0	hypothetical protein BofuT4_P133930.1	no GO terms
Bcin15g02840.1	0.377063	1.34e-269	btb poz domain	F:protein binding
Bcin10g05840.1	0.376722	0	mfs multidrug	P:transmembrane transport; C:membrane; C:integral component of membrane
Bcin04g06640.1	0.376146	0	predicted protein	no IPS match
Bcin15g00020.1	0.376089	1e-136	hypothetical protein BcDW1_357	no GO terms
Bcin02g00005.1	0.375845	0	predicted protein	no GO terms
Bcin04g03720.1	0.374127	4.11e-276	monooxygenase FAD-binding [Botrytis cinerea T4]	F:FAD binding; F:oxidoreductase activity; P:oxidation-reduction process
Bcin09g04130.1	0.373198	0	hypothetical protein BofuT4_P056240.1	F:protein binding
Bcin13g03280.1	0.37013	2.93e-234	hypothetical protein BofuT4_P039910.1	no IPS match
Bcin14g03290.1	0.369832	1.02e-158	predicted protein	no GO terms
Bcin12g04330.1	0.369538	1.95e-221	hypothetical protein BC1G_14408	F:dipeptidyl-peptidase activity; F:hydrolase activity
Bcin09g01130.1	0.369034	1.19e-89	hypothetical protein BcDW1_7814	no GO terms
Bcin09g00290.1	0.368465	3.54e-113	MFS multidrug transporter	P:transmembrane transport; C:integral component of membrane
Bcin12g06300.1	0.365928	0	neutral protease ii	F:metal ion binding; P:proteolysis; F:peptidase activity; C:extracellular region; F:metalloendopeptidase activity; F:metallopeptidase activity; F:hydrolase activity
Bcin05g01970.1	0.365762	3.10076157624146e-316	hypothetical protein BC1G_13085	no GO terms
Bcin11g00010.1	0.364552	2.05e-55	hypothetical protein BC1G_09695	P:carbohydrate metabolic process; F:hydrolase activity, hydrolyzing O-glycosyl compounds
Bcin10g01300.1	0.364225	2.13e-245	[Botrytis cinerea ]	F:methyltransferase activity; F:transferase activity; P:methylation
Bcin02g01990.1	0.36279	2.26e-154	NAD-dependent epimerase dehydratase	no GO terms
Bcin14g04350.2	0.361777	4.59e-298	hypothetical protein BofuT4_P066370.1	no GO terms
Bcin11g00040.1	0.361116	2.05e-61	fad binding domain	F:oxidoreductase activity, acting on CH-OH group of donors; F:flavin adenine dinucleotide binding; P:oxidation-reduction process
Bcin02g04350.1	0.361011	1.71e-66	[Botrytis cinerea ]	no GO terms
Bcin18g00190.1	0.360953	1.41e-144	hypothetical protein GMDG_08597	no IPS match
Bcin15g00660.1	0.359141	3.63e-164	UMTA methyltransferase family	F:methyltransferase activity; P:methylation
Bcin11g02140.1	0.358768	3.16e-244	hypothetical protein BofuT4_P036940.1 [Botrytis cinerea T4]	no GO terms
Bcin09g05670.1	0.357712	6.76e-60	hypothetical protein sscle_08g067270	F:hydrolase activity
Bcin02g01470.1	0.357386	1.8621315921209e-314	hypothetical protein BC1G_02617	F:protein binding; P:transmembrane transport; C:membrane; F:metal ion transmembrane transporter activity; P:metal ion transport
Bcin02g00013.1	0.356936	0	salicylate 1-monooxygenase	F:FAD binding; F:oxidoreductase activity; P:oxidation-reduction process
Bcin05g08400.1	0.356411	0		F:oxidoreductase activity; F:catalytic activity; P:metabolic process; P:oxidation-reduction process; F:phosphopantetheine binding
Bcin15g00030.1	0.356095	1.75e-46	lipase gdsl	C:integral component of membrane
Bcin05g05450.1	0.355298	3.45e-182	hypothetical protein BC1G_01850	no GO terms
Bcin06g07010.1	0.354987	3.27e-305	carbohydrate esterase family 5 [Botrytis cinerea T4]	P:metabolic process; F:hydrolase activity
Bcin01g10130.1	0.354786	1.48e-182	cytosolic non-specific dipeptidase [Botrytis cinerea T4]	P:proteolysis; F:metallopeptidase activity
Bcin10g04500.1	0.354687	9.68e-105	hypothetical protein BC1G_03681	no GO terms
Bcin05g03540.1	0.354682	1.69e-58	o-methyltransferase [Botrytis cinerea 1]	F:O-methyltransferase activity; P:methylation
Bcin13g02170.1	0.353805	1.43e-289	benzoate 4-monooxygenase cytochrome p450	F:iron ion binding; F:metal ion binding; F:oxidoreductase activity, acting on paired donors, with incorporation or reduction of molecular oxygen; F:oxidoreductase activity; C:membrane; C:integral component of membrane; P:oxidation-reduction process; F:monooxygenase activity; F:heme binding
Bcin14g04350.1	0.352744	4.79e-253	hypothetical protein BofuT4_P066370.1	no GO terms
Bcin15g00520.1	0.351949	0	esterase	no GO terms
Bcin06g05350.1	0.3516	4.49e-101	UMTA methyltransferase family	F:methyltransferase activity; P:methylation
Bcin06g04600.1	0.350829	1.75e-260	endoribonuclease l-psp	no GO terms
Bcin12g00140.1	0.350744	2.65e-211	hypothetical protein BofuT4_P120810.1	F:hydrolase activity, acting on carbon-nitrogen (but not peptide) bonds; P:nitrogen compound metabolic process
Bcin18g00060.1	0.350507	9.67e-113	cysteine peptidase	P:proteolysis; F:cysteine-type peptidase activity
Bcin06g01180.1	0.347955	1.04e-139	catalase [Botrytis cinerea T4]	P:response to oxidative stress; F:metal ion binding; F:catalase activity; P:cellular oxidant detoxification; P:oxidation-reduction process; F:heme binding
Bcin11g06560.1	0.347823	1.51e-197	hypothetical protein V491_07848	no GO terms
Bcin05g05950.1	0.344323	1.37e-170	GMC oxidoreductase [Botrytis cinerea T4]	F:oxidoreductase activity, acting on CH-OH group of donors; F:flavin adenine dinucleotide binding; P:oxidation-reduction process
Bcin01g04420.1	0.34375	4.95e-244	hypothetical protein BC1G_13891	F:catalytic activity; P:metabolic process
Bcin04g06930.1	0.343261	1.15e-248	nadph-dependent fmn reductase [Botrytis cinerea 1]	F:oxidoreductase activity; P:oxidation-reduction process
Bcin02g05670.1	0.342652	1.76e-272	hypothetical protein BofuT4_P152720.1	C:membrane; C:integral component of membrane
Bcin10g00040.1	0.342632	7.27e-162		F:catalytic activity; P:metabolic process; F:phosphopantetheine binding
Bcin14g03740.1	0.342529	9.11e-27	zinc finger	F:metal ion binding
Bcin04g00800.1	0.342489	2.16e-295	hypothetical protein BofuT4_P085570.1	F:protein binding
Bcin13g05670.1	0.341872	3.82e-267	aliphatic nitrilase [Botrytis cinerea T4]	F:hydrolase activity, acting on carbon-nitrogen (but not peptide) bonds; P:nitrogen compound metabolic process
Bcin09g00680.1	0.341631	2.04e-285	hypothetical protein BC1G_09154	F:oxidoreductase activity
Bcin14g03300.1	0.340887	6.56e-260	hypothetical protein BofuT4_P032440.1 [Botrytis cinerea T4]	no GO terms
Bcin01g11560.1	0.340826	3.99e-183	hypothetical protein V491_07848	no GO terms
Bcin04g06920.1	0.340223	2.98e-207	putative carboxylesterase protein	no GO terms
Bcin16g02270.1	0.339435	9.78e-285	U1biquitin-specific peptidase [Botrytis cinerea T4]	F:metal ion binding
Bcin10g05850.1	0.338014	0	hypothetical protein BcDW1_5928	no GO terms
Bcin15g00730.1	0.337833	1.01e-32	cytochrome P450 monooxygenase [Botrytis cinerea T4]	F:iron ion binding; F:oxidoreductase activity, acting on paired donors, with incorporation or reduction of molecular oxygen; P:oxidation-reduction process; F:monooxygenase activity; F:heme binding
Heritability to Host x Pathogen
Bcin11g02350.1	0.181161	2.42e-10	ribosomal RNA-processing [Botrytis cinerea T4]	P:rRNA processing; C:preribosome, small subunit precursor
Bcin09g01190.1	0.180548	6.66e-25	tripeptidyl-peptidase 1 precursor	P:proteolysis; F:serine-type endopeptidase activity
Bcin09g02890.1	0.177456	1.11e-11	malate dehydrogenase [Botrytis cinerea 1]	no GO terms
Bcin10g01130.1	0.176542	2.26e-07	secretory pathway sec39	P:retrograde vesicle-mediated transport, Golgi to ER; C:intracellular
Bcin02g00250.1	0.172297	0.0044509	hypothetical protein BC1G_05520	C:integral component of membrane; F:transferase activity, transferring alkyl or aryl (other than methyl) groups
Bcin06g00130.1	0.171274	0.00857707		P:transmembrane transport
Bcin05g01510.1	0.171028	0.000283887	carbohydrate-binding [Botrytis cinerea 1]	no GO terms
Bcin02g05710.1	0.169655	0.000104471	hypothetical protein BC1G_08051	C:Golgi transport complex; P:intra-Golgi vesicle-mediated transport
Bcin03g05590.1	0.169411	9.55e-05	glutamyl-trna amidotransferase	F:transferase activity; F:carbon-nitrogen ligase activity, with glutamine as amido-N-donor
Bcin01g10070.1	0.168842	4.92e-06	hypothetical protein BC1G_05308	F:catalytic activity; P:biosynthetic process
Bcin13g02380.1	0.16872	5.29e-12	DUF866 domain-containing [Botrytis cinerea T4]	no GO terms
Bcin14g05090.1	0.168442	1.84e-10	transcription factor Zn cluster transcription factor Rds2	C:nucleus; F:zinc ion binding; P:regulation of transcription, DNA-templated; F:RNA polymerase II transcription factor activity, sequence-specific DNA binding
Bcin16g01070.1	0.167794	0.0443558	putative rna-processing protein	P:tRNA processing; P:rRNA processing
Bcin09g04340.1	0.167758	2.54e-08	hypothetical protein BofuT4_P056550.1 [Botrytis cinerea T4]	no GO terms
Bcin08g06480.1	0.167595	4.88e-05	hypothetical protein BofuT4_P155700.1	F:protein binding
Bcin11g05560.1	0.167274	1.48e-09	mitochondrial intermediate peptidase	F:metal ion binding; P:proteolysis; F:peptidase activity; F:metalloendopeptidase activity; F:metallopeptidase activity; F:hydrolase activity
Bcin12g04450.1	0.166428	1.32e-06	pre-mRNA splicing factor cef-1	F:DNA binding
Bcin12g00380.1	0.166158	1.42e-07	secreted [Botrytis cinerea T4]	no GO terms
Bcin02g04840.1	0.16563	3.08e-06	inorganic phosphate transporter [Botrytis cinerea T4]	F:inorganic phosphate transmembrane transporter activity; P:transmembrane transport; P:phosphate ion transport; F:transmembrane transporter activity; C:membrane; C:integral component of membrane; F:transporter activity
Bcin01g10480.1	0.165223	5.24e-11	ribosome biogenesis (Rrs1) [Botrytis cinerea T4]	C:nucleus; P:ribosome biogenesis
Bcin05g00790.1	0.164771	0.00138745	hypothetical protein BC1G_09397	F:nucleic acid binding; F:DNA binding; C:nucleus; P:regulation of transcription, DNA-templated
Bcin09g02650.1	0.163929	4.73e-09	hypothetical protein BofuT4_P053940.1	F:metal ion binding
Bcin05g00980.3	0.163819	6.37e-05		F:DNA binding
Bcin10g05880.1	0.163813	2.95e-07	hypothetical protein BC1G_15882	F:methyltransferase activity
Bcin11g01970.1	0.163288	2.17e-11	hypothetical protein BofuT4_P036710.1	C:membrane; P:proteolysis; C:integral component of membrane; F:serine-type endopeptidase activity; F:peptidase activity; F:hydrolase activity
Bcin11g05220.1	0.163255	6.94e-08	phd finger domain [Botrytis cinerea 1]	F:zinc ion binding; F:metal ion binding
Bcin15g02340.1	0.16307	6.57e-10	translation initiation factor eif4e3 [Botrytis cinerea 1]	F:translation initiation factor activity; F:RNA binding; C:cytoplasm; P:translational initiation; P:translation
Bcin03g08690.1	0.162944	0.0489781	hypothetical protein BC1G_06669	F:catalytic activity
Bcin02g03420.1	0.162671	1.01e-05	small nuclear ribonucleo lsm2	C:intracellular ribonucleoprotein complex; C:viral nucleocapsid; P:mRNA processing
Bcin03g08600.1	0.162101	4.96e-06	wd repeat domain 5b	F:protein binding
Bcin01g04740.1	0.162012	0.0468841	rna polymerase i specific transcription initiation factor	F:translation initiation factor activity; P:translational initiation
Bcin06g06790.1	0.161889	2.77e-09	required for cell viability Rrp17 [Botrytis cinerea T4]	no GO terms
Bcin02g04720.1	0.161421	0.00556238	predicted protein	no GO terms
Bcin03g02720.1	0.161341	1.27e-08	CDP-diacylglycerol-glycerol-3-phosphate 3-phosphatidyltransferase	F:catalytic activity; F:CDP-diacylglycerol-glycerol-3-phosphate 3-phosphatidyltransferase activity; P:cardiolipin biosynthetic process
Bcin08g05230.1	0.161159	1.39e-08	mitochondrial ribosomal subunit L51 [Botrytis cinerea T4]	C:ribosome
Bcin16g03190.1	0.161053	0.0420171	[Botrytis cinerea ]	no GO terms
Bcin04g03850.1	0.160488	9.23e-09	2fe-2s iron-sulfur cluster binding domain-containing [Botrytis cinerea 1]	F:metal ion binding; F:electron carrier activity; F:iron-sulfur cluster binding; F:2 iron, 2 sulfur cluster binding
Bcin06g00900.1	0.160196	1.26e-06	Lipoic acid synthetase	F:catalytic activity; C:mitochondrion; F:4 iron, 4 sulfur cluster binding; F:sulfurtransferase activity; F:lipoate synthase activity; F:iron-sulfur cluster binding; P:lipoate biosynthetic process; P:protein lipoylation
Bcin10g00230.1	0.160002	0.00434021	predicted protein	F:FMN binding; F:cofactor binding
Bcin03g06210.1	0.159725	6.45e-05	elongation factor EFE1 [Botrytis cinerea T4]	F:translation elongation factor activity; P:translational elongation
Bcin04g04100.1	0.159391	0.000735305	3-oxoacyl-(acyl-carrier- ) reductase [Botrytis cinerea T4]	F:oxidoreductase activity; P:oxidation-reduction process
Bcin03g00860.1	0.159085	8.52e-09	adenosine deaminase [Botrytis cinerea T4]	F:adenine deaminase activity; C:nucleus; F:zinc ion binding; C:cytoplasm; F:metal ion binding; P:adenine catabolic process; P:hypoxanthine salvage; P:purine ribonucleoside monophosphate biosynthetic process; P:nucleotide metabolic process; F:deaminase activity; F:hydrolase activity
Bcin11g04700.1	0.159068	0.00024548	hypothetical protein BofuT4_P079340.1	no GO terms
Bcin01g02990.1	0.158829	1.96e-08	hypothetical protein sscle_02g014110	no GO terms
Bcin14g01410.1	0.15876	0.00556238	amino acid transporter [Botrytis cinerea 1]	P:transmembrane transport; C:membrane; C:integral component of membrane; F:amino acid transmembrane transporter activity; P:transport; P:amino acid transport; P:amino acid transmembrane transport
Bcin09g01770.1	0.158636	0.000312214	transcription factor C2H2	P:proteolysis; F:serine-type peptidase activity; F:serine-type endopeptidase activity; F:peptidase activity; F:hydrolase activity
Bcin12g02260.1	0.158521	6.35e-05	serine threonine phosphatase	F:phosphoprotein phosphatase activity; P:protein dephosphorylation; F:hydrolase activity
Bcin02g03810.1	0.158394	1.11e-05	gtp cyclohydrolase [Botrytis cinerea 1]	C:cytoplasm; F:GTP cyclohydrolase I activity; P:tetrahydrofolate biosynthetic process; F:hydrolase activity
Bcin03g08860.1	0.158123	2.51e-05	pentatricopeptide repeat	F:protein binding
Bcin02g09280.1	0.158038	5.91e-08	cfia complex component [Botrytis cinerea 1]	C:nucleus; P:RNA processing; P:mRNA processing
Bcin06g06440.1	0.157954	0.000594709	DNA helicase	F:nucleotide binding; F:ATP binding; F:helicase activity
Bcin02g08510.1	0.157944	2.2e-07	putative bromodomain-containing protein	F:protein binding
Bcin04g02210.1	0.157725	1.09e-06	kh domain-containing [Botrytis cinerea 1]	F:nucleic acid binding; C:nucleus; F:RNA binding
Bcin02g03980.1	0.157667	7.27e-07	COP9 signalosome complex subunit 4 [Botrytis cinerea T4]	F:protein binding
Bcin08g03070.1	0.157578	3.23e-08	transcriptional elongation factor Iws1 [Botrytis cinerea T4]	F:DNA binding; C:nucleus; F:translation elongation factor activity; P:transcription, DNA-templated; P:translational elongation
Bcin02g06760.1	0.157438	3.64e-07	transcription factor C2H2 [Botrytis cinerea T4]	F:nucleic acid binding; F:zinc ion binding; F:metal ion binding
Bcin13g02190.1	0.15741	0.00256697	predicted protein	no GO terms
Bcin14g03890.1	0.157333	2.23e-11	pyruvate dehydrogenase kinase	P:phosphorylation; F:transferase activity, transferring phosphorus-containing groups; F:kinase activity
Bcin07g01910.1	0.157218	2.74e-05	ZIP metal ion transporter	P:transmembrane transport; C:membrane; C:integral component of membrane; F:metal ion transmembrane transporter activity; P:metal ion transport
Bcin08g01480.1	0.157211	4.27e-05	hypothetical protein BC1G_07912 [Botrytis cinerea B05.10]	C:nuclear pore
Bcin02g08270.1	0.157161	5.11e-08	Img2p [Botrytis cinerea T4]	F:structural constituent of ribosome; C:ribosome; C:intracellular; P:translation
Bcin07g04040.1	0.157093	0.00334531	small oligopeptide transporter [Botrytis cinerea T4]	P:transmembrane transport; C:membrane; C:integral component of membrane
Bcin10g05260.1	0.156869	0.0322859	zn 2cys6 transcription factor	C:nucleus; F:zinc ion binding; P:regulation of transcription, DNA-templated; F:RNA polymerase II transcription factor activity, sequence-specific DNA binding
Bcin05g07420.1	0.156833	1.86e-07	u5 small nuclear ribonucleo component	F:GTP binding; F:nucleotide binding; C:intracellular ribonucleoprotein complex; F:GTPase activity; C:viral nucleocapsid
Bcin10g05390.1	0.156829	2.59e-10	hypothetical protein BC1G_10187	F:methyltransferase activity
Bcin01g08280.1	0.156816	2.72e-09	phosphoribosylglycinamide formyltransferase	F:phosphoribosylglycinamide formyltransferase activity; P:'de novo' IMP biosynthetic process; P:biosynthetic process; F:transferase activity; F:hydroxymethyl-, formyl- and related transferase activity
Bcin15g01230.1	0.156797	0.00170231		no GO terms
Bcin13g00440.1	0.156788	7.37e-10	mitochondrial import inner membrane translocase subunit tim23 [Botrytis cinerea T4]	C:membrane; C:integral component of membrane
Bcin02g06440.2	0.156782	3.02e-09	hypothetical protein sscle_12g089180	F:nucleic acid binding
Bcin04g04280.1	0.156633	2.47e-10	hypothetical protein BcDW1_2744	no GO terms
Bcin01g06600.1	0.156507	0.0036338	dihydrodipicolinate synthetase family [Botrytis cinerea T4]	F:catalytic activity; P:metabolic process; F:lyase activity
Bcin11g03110.1	0.156498	3.17e-10	U1biquitin-specific peptidase [Botrytis cinerea T4]	P:protein deubiquitination; C:membrane; C:integral component of membrane; F:thiol-dependent ubiquitinyl hydrolase activity; P:ubiquitin-dependent protein catabolic process; F:hydrolase activity
Bcin03g00780.1	0.156397	0.000110917	hypothetical protein BofuT4_P011530.1	F:nucleotide binding; F:ATP binding
Bcin14g04640.1	0.156342	0.0249242	peptidyl prolyl cis-trans isomerase Cyclophilin [Botrytis cinerea T4]	F:nucleotide binding; F:nucleic acid binding; F:peptidyl-prolyl cis-trans isomerase activity; P:protein peptidyl-prolyl isomerization; P:protein folding; F:isomerase activity
Bcin05g05460.1	0.156292	1.64e-06	transcription elongation factor S-II [Botrytis cinerea ]	F:nucleic acid binding; F:DNA binding; C:nucleus; F:zinc ion binding; F:translation elongation factor activity; P:transcription, DNA-templated; P:regulation of DNA-templated transcription, elongation; P:regulation of transcription, DNA-templated; P:translational elongation; P:regulation of transcription from RNA polymerase II promoter
Bcin02g08670.1	0.156193	3.3e-10	hypothetical protein BC1G_06858	F:nucleotidyltransferase activity; F:protein binding; P:biosynthetic process; F:binding
Bcin10g02440.1	0.156186	2.32e-08	dnaj domain containing [Botrytis cinerea 1]	F:protein binding
Bcin01g05140.2	0.156067	0.000230331	hypothetical protein sscle_02g017060	F:nucleic acid binding; F:ATP binding
Bcin13g01280.1	0.156016	1.03e-09	39S ribosomal L33	F:structural constituent of ribosome; C:ribosome; C:intracellular; P:translation
Bcin11g06180.1	0.155986	1.9e-09	purine-cytosine permease [Botrytis cinerea T4]	P:transmembrane transport; C:membrane; C:integral component of membrane; P:transport; F:transporter activity
Bcin12g01680.1	0.155983	5.04e-05	dna polymerase subunit cdc27 [Botrytis cinerea 1]	C:nucleus; P:DNA replication
Bcin16g03130.1	0.155934	8.27e-08	GTP-binding [Botrytis cinerea T4]	F:GTP binding
Bcin03g03630.1	0.155925	1.22e-11	xyloglucan-specific endo-beta glucanase precursor [Botrytis cinerea 1]	P:carbohydrate metabolic process; P:polysaccharide catabolic process; P:metabolic process; F:hydrolase activity, hydrolyzing O-glycosyl compounds; F:cellulase activity; F:hydrolase activity, acting on glycosyl bonds; F:hydrolase activity
Bcin10g03450.1	0.155875	2.98e-05	hypothetical protein BC1G_11795	no GO terms
Bcin01g02440.1	0.155779	0.019711	oxidoreductase [Botrytis cinerea T4]	F:zinc ion binding; F:oxidoreductase activity; P:oxidation-reduction process
Bcin09g06490.1	0.155669	0.00107597	hypothetical protein BofuT4_P025070.1	no GO terms
Bcin02g05150.1	0.155658	7.83e-14	kinase [Botrytis cinerea T4]	F:ATP binding; F:protein kinase activity; P:protein phosphorylation
Bcin05g02190.1	0.155645	1.42e-06		F:protein binding
Bcin14g01150.1	0.155606	1.29e-06	thioredoxin 5 [Botrytis cinerea 1]	no GO terms
Bcin10g02410.1	0.155577	2.83e-06	EFG1P_BOTFB ame: Full=rRNA-processing efg1	P:maturation of SSU-rRNA from tricistronic rRNA transcript (SSU-rRNA, 5.8S rRNA, LSU-rRNA); C:nucleus; P:regulation of G1/S transition of mitotic cell cycle; P:rRNA processing; C:nucleolus
Bcin03g05310.1	0.155505	1.5e-09	importin 13	F:binding
Bcin12g01510.1	0.155486	7.77e-05		P:intracellular signal transduction
Bcin04g02150.1	0.155452	1.9e-08	37s ribosomal rsm25 [Botrytis cinerea 1]	F:structural constituent of ribosome; C:intracellular ribonucleoprotein complex; C:mitochondrion; C:ribosome; C:mitochondrial small ribosomal subunit
Bcin11g01760.1	0.155402	6.19e-07	cell cycle control [Botrytis cinerea 1]	P:RNA processing
Bcin10g04820.1	0.15516	1.53e-10	mitochondrial sodium hydrogen exchanger [Botrytis cinerea T4]	P:transmembrane transport; F:solute:proton antiporter activity; F:sodium:proton antiporter activity; F:antiporter activity; P:hydrogen ion transmembrane transport; P:transport; P:regulation of pH; P:sodium ion transport; P:ion transport; P:cation transport; C:membrane; C:integral component of membrane; P:sodium ion transmembrane transport
Bcin14g04820.1	0.154828	0.000174467	putative gtp-binding protein	no GO terms
Bcin15g01270.1	0.154762	6.98e-10	hypothetical protein BofuT4_P006400.1	F:nucleotide binding; F:nucleic acid binding
Bcin01g06100.1	0.154668	4.81e-10	histidine acid phosphatase [Botrytis cinerea T4]	C:membrane; C:integral component of membrane; P:dephosphorylation; F:acid phosphatase activity
Bcin01g07540.1	0.154529	1.18e-06	valyl-tRNA synthetase	F:nucleotide binding; F:valine-tRNA ligase activity; P:tRNA aminoacylation for protein translation; F:ATP binding; F:aminoacyl-tRNA ligase activity; P:valyl-tRNA aminoacylation; P:regulation of translational fidelity; F:aminoacyl-tRNA editing activity; F:ligase activity; P:translation
Bcin16g04780.1	0.154503	3.81e-05	sphingolipid c9-methyltransferase [Botrytis cinerea 1]	C:Golgi transport complex; P:intra-Golgi vesicle-mediated transport; F:methyltransferase activity; F:transferase activity; P:methylation
Heritability to Host
Bcin03g06120.1	0.143854	7.37e-85	transmembrane helices; hypothetical protein BC1G_06089	no GO terms
Bcin16g00870.1	0.126525	1.57e-80	Cytochrome c oxidase, subunit VIIa superfamily; [Botrytis cinerea ]	C:integral component of membrane
Bcin04g00560.1	0.103362	4.54e-53	NADH dehydrogenase; hypothetical protein BC1G_07041 [Botrytis cinerea B05.10]	no GO terms
Bcin02g02510.1	0.102237	7.23e-60	hypothetical protein BofuT4_P110040.1	F:ATPase activity; P:small molecule metabolic process; F:transmembrane transporter activity; C:mitochondrion; C:protein complex; P:cellular nitrogen compound metabolic process; P:biosynthetic process
Bcin01g09600.1	0.101786	1.22e-66	upf0041 domain-containing [Botrytis cinerea 1]	C:mitochondrion; P:transport
Bcin01g02300.1	0.101215	2.98e-59	hypothetical protein BC1G_12912 [Botrytis cinerea B05.10]	C:membrane; C:integral component of membrane
Bcin10g05940.1	0.0983105	1.21e-57	fungal specific transcription; NTF2_like Nuclear transport factor 2 [Botrytis cinerea 1]	no GO terms
Bcin15g02110.1	0.0977203	3.13e-57	cytochrome c oxidase subunit V [Botrytis cinerea ]	F:cytochrome-c oxidase activity; C:integral component of membrane; P:hydrogen ion transmembrane transport
Bcin12g06540.1	0.097075	1.95e-54	Bcatp17; mitochondrial F1F0 ATP synthase subunit F [Botrytis cinerea T4]	C:integral component of membrane
Bcin10g02260.1	0.0963546	3.14e-53	transmembrane helices; NADH:ubiquinone oxidoreductase [Botrytis cinerea T4]	C:cellular_component
Bcin09g02780.1	0.095191	1.21e-57	predicted protein	no GO terms
Bcin03g07390.1	0.0934827	3.4e-67	Bcccg1; glucose-repressible gene [Botrytis cinerea ]	no GO terms
Bcin09g02790.1	0.0905782	1.81e-61	acetyl-coenzyme A synthetase 1	F:ATP binding; F:acetate-CoA ligase activity; F:AMP binding; P:acetyl-CoA biosynthetic process from acetate
Bcin10g01120.1	0.0898883	2.82e-46	nadh:ubiquinone oxidoreductase subunit [Botrytis cinerea 1]	no GO terms
Bcin15g04200.1	0.0892276	5.91e-47	alpha- glucosyltransferase alg-10 [Botrytis cinerea 1]	C:integral component of membrane; F:transferase activity
Bcin13g00790.1	0.0871684	2.14e-45	Bcmrpl17; Ribosomal protein L46; hypothetical protein BC1G_04410 [Botrytis cinerea B05.10]	no GO terms
Bcin13g03470.1	0.0865431	1.1e-60	predicted protein	no GO terms
Bcin10g04670.1	0.0857199	1.31e-44	NADH-ubiquinone oxidoreductase B12 subunit [Botrytis cinerea T4]	P:generation of precursor metabolites and energy; C:mitochondrion; C:protein complex
Bcin10g00480.1	0.0856683	2.98e-59	surface SP1 [Botrytis cinerea T4]	no GO terms; signal peptide
Bcin04g06310.1	0.0847898	2.63e-62	Bcatx1; Heavy metal-associated domain superfamily; hypothetical protein BC1G_03899 [Botrytis cinerea B05.10]	F:ion binding; P:transport;
Bcin12g01360.1	0.0841474	1.07e-52	Bcfpr1; FK506-binding peptidyl-prolyl cis-trans isomerase	F:peptidyl-prolyl cis-trans isomerase activity; P:protein peptidyl-prolyl isomerization; P:protein folding
Bcin02g01810.1	0.0834947	4.3e-47	TspO/MBR-related protein; benzodiazepine receptor family [Botrytis cinerea T4]	C:cellular_component
Bcin06g06220.1	0.083364	3.44e-44	Bcsdh7; acetate non-utilizing 9 [Botrytis cinerea T4]	C:mitochondrion
Bcin02g08370.1	0.0832128	8.1e-53	Bcprx7; tsa family	F:oxidoreductase activity; P:oxidation-reduction process
Bcin04g04070.1	0.0823897	2.34e-54	upf0591 membrane [Botrytis cinerea 1]	C:integral component of membrane
Bcin02g04920.1	0.0821655	1.59e-45	ubiquitin-conjugating enzyme E2-16 kDa [Botrytis cinerea ]	F:nucleotide binding; F:ATP binding
Bcin11g01880.1	0.0820529	5.32e-51	membrane-associated progesterone receptor component 1 [Botrytis cinerea T4]	C:cellular_component
Bcin14g04630.1	0.0812045	8.7e-54	Bcpic2; transmembrane helices; 2 [Botrytis cinerea T4]	no GO terms; NADH-ubiquinone reductase complex 1 MLRQ subunit
Bcin11g04130.1	0.0805094	2.34e-54	Cyanamide hydratase; urea hydro-lyase cyanamide hydratase [Botrytis cinerea T4]	F:lyase activity
Bcin03g07950.2	0.0804501	2.96e-48	hypothetical protein BC1G_14511 [Botrytis cinerea B05.10]	no GO terms
Bcin11g06250.1	0.0801272	1.74e-43	26 proteasome complex subunit [Botrytis cinerea 1]	P:mRNA export from nucleus; C:proteasome regulatory particle, lid subcomplex; P:proteasome assembly
Bcin01g07930.1	0.0789829	7.92e-47	hypothetical protein BC1G_00142	no GO terms
Bcin14g02980.1	0.078274	2.06e-46	cytochrome c oxidase family [Botrytis cinerea T4]	C:mitochondrial respiratory chain; F:cytochrome-c oxidase activity; P:respiratory electron transport chain; C:integral component of membrane; P:hydrogen ion transmembrane transport
Bcin05g01860.1	0.0777588	2.44e-45	hypothetical protein BC1G_13073	no GO terms
Bcin16g03800.1	0.0776532	4.83e-45	conserved hypothetical protein	no GO terms
Bcin13g04640.1	0.0774097	2.59e-49	hypothetical protein BC1G_13374	F:oxidoreductase activity
Bcin02g03510.1	0.077146	1.07e-52	---NA---	no GO terms
Bcin03g05240.1	0.0765022	7.66e-42	hypothetical protein sscle_03g028110	no GO terms
Bcin09g04620.1	0.0756605	5.52e-53	chaperone heat shock Hsp12 [Botrytis cinerea T4]	P:response to stress
Bcin16g03610.1	0.0751025	2.09e-46	mapeg family [Botrytis cinerea 1]	C:cellular_component
Bcin05g07460.1	0.0751002	7.42e-44	small nuclear ribonucleo g [Botrytis cinerea T4]	C:intracellular
Bcin01g08260.1	0.0749039	1.04e-42	6,7-dimethyl-8-ribityllumazine synthase [Botrytis cinerea ]	P:riboflavin biosynthetic process; F:transferase activity; C:riboflavin synthase complex
Bcin04g04500.1	0.0742656	1.16e-41	outer mitochondrial membrane porin [Botrytis cinerea ]	F:voltage-gated anion channel activity; P:regulation of anion transmembrane transport; P:transmembrane transport; C:mitochondrial outer membrane; P:anion transport
Bcin05g01740.1	0.07418	4.57e-37	acetylserotonin methytransferase (ASMTL) [Botrytis cinerea T4]	C:cytoplasm; F:transferase activity
Bcin11g02940.1	0.0740755	3.58e-42	hypothetical protein BC1G_04814 [Botrytis cinerea B05.10]	no GO terms
Bcin01g07870.1	0.0737234	1.67e-54	hypothetical protein BofuT4_P048690.1	no GO terms
Bcin03g07260.1	0.0735339	6.02e-41	hypothetical protein BC1G_11705 [Botrytis cinerea B05.10]	no GO terms
Bcin10g01230.1	0.073532	8.76e-38	chalcone-flavanone isomerase [Botrytis cinerea 1]	F:intramolecular lyase activity
Bcin03g08030.1	0.0728618	3.44e-45	[Botrytis cinerea ]	no GO terms
Bcin10g02280.1	0.0717312	7.24e-44	putative glycogenin protein	F:transferase activity, transferring glycosyl groups
Bcin10g05130.1	0.0716567	1.71e-48	NAD dependent epimerase dehydratase family [Botrytis cinerea T4]	no GO terms
Bcin08g01940.1	0.0714428	8.33e-39	predicted protein	no GO terms
Bcin02g02980.1	0.071265	5.85e-36	antibiotic biosynthesis monooxygenase [Botrytis cinerea 1]	P:oxidation-reduction process; F:monooxygenase activity
Bcin03g05320.1	0.0703073	3.32e-44	[Botrytis cinerea ]	no GO terms
Bcin02g07890.1	0.0702571	1.14e-46	[Botrytis cinerea ]	no GO terms
Bcin05g04430.1	0.0699655	4.43e-37	succinate dehydrogenase subunit D [Botrytis cinerea]	C:integral component of membrane; C:mitochondrial envelope
Bcin01g06340.1	0.0696716	2.13e-39	deoxyuridine 5 -triphosphate nucleotidohydrolase	F:dUTP diphosphatase activity; P:dUTP metabolic process; F:hydrolase activity
Bcin12g03680.1	0.0694598	3.28e-44	NAD dependent epimerase dehydratase family [Botrytis cinerea T4]	F:NAD binding; P:oxidation-reduction process; F:oxidoreductase activity, acting on the aldehyde or oxo group of donors, NAD or NADP as acceptor
Bcin04g05820.1	0.0693591	4.94e-39	R3H domain-containing [Botrytis cinerea T4]	F:molecular_function
Bcin16g03090.1	0.0692957	1.63e-35	DUF410 domain [Botrytis cinerea T4]	no GO terms
Bcin15g03460.1	0.0690433	2.33e-41	hypothetical protein BC1G_02985	F:protein binding
Bcin03g06850.1	0.0681092	1.31e-32	superoxide dismutase copper chaperone [Botrytis cinerea T4]	F:ion binding; F:enzyme regulator activity; P:transport
Bcin15g00520.1	0.0680918	2.48e-108	esterase	no GO terms
Bcin03g08670.1	0.0677762	4.76e-36	hypothetical protein BofuT4_P078010.1	F:zinc ion binding
Bcin07g01700.1	0.0669294	2.44e-33	hypothetical protein BC1G_15665	F:nucleic acid binding; P:mRNA 3'-end processing
Bcin12g03600.1	0.0664299	1.61e-36	stress response RCI peptide [Botrytis cinerea T4]	C:integral component of membrane
Bcin16g02690.1	0.0660753	8.78e-33	hypothetical protein BC1G_09167 [Botrytis cinerea B05.10]	no GO terms
Bcin15g00100.1	0.0658959	6.84e-46	-binding [Botrytis cinerea 1]	no GO terms
Bcin14g03030.1	0.0657339	3.63e-42	hypothetical protein BC1G_10056	no GO terms
Bcin10g02960.1	0.0656871	2.44e-41	duf1295 domain	C:cellular_component
Bcin05g06710.1	0.0656574	1.77e-32	mitochondrial import inner membrane translocase subunit tim9 [Botrytis cinerea T4]	F:metal ion binding; C:mitochondrion; P:protein transport
Bcin11g05200.1	0.0652558	1.06e-33	caffeine-induced death Cid2 [Botrytis cinerea T4]	no GO terms
Bcin01g05230.1	0.0651438	3.41e-35	upf0136 membrane [Botrytis cinerea 1]	C:cellular_component
Bcin03g07020.1	0.0647745	7.81e-36		F:nucleic acid binding
Bcin03g00800.1	0.0639133	1.82e-37	cytochrome b5-like heme steroid binding domain-containing	no GO terms
Bcin12g06320.1	0.0629874	4.27e-35	pyridoxamine 5 -phosphate oxidase [Botrytis cinerea T4]	F:pyridoxamine-phosphate oxidase activity; P:pyridoxal phosphate biosynthetic process; P:pyridoxine biosynthetic process; F:FMN binding; P:oxidation-reduction process
Bcin02g02850.1	0.0625987	8.7e-37	phosphotransferase enzyme family	F:transferase activity
Bcin05g05850.1	0.06236	1.97e-38	ornithine decarboxylase	F:metal ion binding; P:polyamine biosynthetic process; F:hydrolase activity
Bcin14g01950.1	0.0621468	8.74e-29	kinase [Botrytis cinerea T4]	F:ATP binding; F:protein serine/threonine kinase activity; P:protein phosphorylation
Bcin12g05010.1	0.0618595	1.24e-30	putative bcp1-like protein	C:nucleus; P:protein transport
Bcin04g01940.1	0.0617242	1.44e-33	cytochrome-c oxidase chain viic	F:cytochrome-c oxidase activity; C:integral component of membrane; P:hydrogen ion transmembrane transport
Bcin10g00440.1	0.0614561	4.3e-34	flavo oxygenase	F:FMN binding; F:oxidoreductase activity; P:oxidation-reduction process
Bcin08g01720.1	0.0612085	6.27e-42	predicted protein	no GO terms
Bcin16g04620.1	0.0603845	1.68e-42	hypothetical protein sscle_14g101510
Bcin11g02070.1	0.0592861	2.63e-34	hypothetical protein BofuT4P29000015001	no GO terms
Bcin12g03670.1	0.0589596	3.27e-33	hypothetical protein BC1G_08721	no GO terms
Bcin09g06230.1	0.058655	1.96e-44	[Botrytis cinerea ]	no GO terms
Bcin01g03790.1	0.058388	3.21e-33	class IV chitin synthase [Botrytis cinerea T4]	F:transferase activity, transferring hexosyl groups; C:integral component of membrane
Bcin02g00540.1	0.0583319	4.71e-38	prolyl oligopeptidase [Botrytis cinerea T4]	P:biological_process; F:molecular_function
Bcin06g01840.1	0.0583111	1.36e-31	Grp1p [Botrytis cinerea T4]	F:nucleotide binding; F:nucleic acid binding
Bcin02g01060.1	0.0582159	5.15e-34	nucleoside diphosphate kinase [Botrytis cinerea 1]	F:nucleotide binding; F:ATP binding; P:UTP biosynthetic process; P:CTP biosynthetic process; P:GTP biosynthetic process; P:nucleoside diphosphate phosphorylation; F:nucleoside diphosphate kinase activity; P:phosphorylation; F:transferase activity; F:kinase activity
Bcin06g04300.1	0.0582002	3.52e-31	pyridoxamine phosphate oxidase [Botrytis cinerea T4]	F:pyridoxamine-phosphate oxidase activity; P:pyridoxal phosphate biosynthetic process; F:FMN binding; P:oxidation-reduction process
Bcin08g01330.1	0.0580141	4.02e-29	transferase caf17	F:transferase activity
Bcin16g01710.1	0.0579328	8.88e-21	transcription factor C2H2 [Botrytis cinerea T4]	F:nucleic acid binding
Bcin09g01970.1	0.0578427	1.42e-40	glycoside hydrolase family 16 [Botrytis cinerea T4]	P:carbohydrate metabolic process; C:integral component of membrane; F:hydrolase activity, hydrolyzing O-glycosyl compounds
Bcin15g02650.1	0.0577009	6.91e-38	peroxisomal NADH pyrophosphatase NUDT12 [Botrytis cinerea T4]	F:metal ion binding; F:hydrolase activity
Bcin03g01900.1	0.0576655	4.15e-36	ribosomal protein L39e, putative	F:structural constituent of ribosome; C:ribosome; C:intracellular; P:translation
Bcin05g01630.1	0.0575388	8.4e-28	[Botrytis cinerea ]	C:endoplasmic reticulum; C:protein complex; P:transport
Bcin03g07950.1	0.0572826	2.87e-30	hypothetical protein BC1G_14511 [Botrytis cinerea B05.10]	no IPS match
Bcin06g04890.1	0.0570593	8.03e-28	hypothetical protein BC1G_02354 [Botrytis cinerea B05.10]	C:integral component of membrane
