# Supplementary material for: Plant–necrotroph co-transcriptome networks illuminate a metabolic battlefield
Source: eLife. 2019 May 13;8:e44279. doi: 10.7554/eLife.44279 (PMC6557632; doi:10.7554/eLife.44279)
Supplement: Figure 3—source data 1. — A table of spearman’s rank correlation coefficiency between lesion area and B. cinerea transcripts accumulation across three Arabidopsis genotypes or under individual genotypes. Three Arabidopsis genotypes are wild-type Col-0, jasmonate insensitive mutant coi1-1, and salicylic acid insensitive mutant npr1-1. [file elife-44279-fig3-data1.xlsx]

## Sheet: F3_SD1_CorLesBcTranscripts
Figure 3-source data 1. Spearman’s rank correlation between lesion area and B. cinerea transcripts abundance. A table of spearman’s rank correlation coefficiency between lesion area and B. cinerea transcripts accumulation across three Arabidopsis genotypes or under individual genotypes. Three Arabidopsis genotypes are wild-type Col-0, jasmonate insensitive mutant coi1-1, and salicylic acid insens…
	All Genotypes				Col-0		coi1-1		npr1-1
Gene ID	Cor	P-Value	Description	GO	Cor	P-Value	Cor	P-Value	Cor	P-Value
Bcin10g00480.1	0.596933	0	surface SP1 [Botrytis cinerea T4]	no GO terms	0.475448	0.000128679	0.528228	5.87363e-06	0.354327	0.0111105
Bcin05g06830.1	0.542292	0	chitin binding [Botrytis cinerea 1]	no GO terms	0.581348	4.31208e-07	0.562046	1.05904e-06	0.391441	0.00415197
Bcin06g02510.1	0.536615	0	serine carboxypeptidase (secreted ) [Botrytis cinerea T4]	P:proteolysis; F:serine-type carboxypeptidase activity	0.483193	9.76945e-05	0.501804	2.00403e-05	0.30799	0.0327545
Bcin12g02910.1	0.51627	0	cellobiose dehydrogenase	F:oxidoreductase activity; F:ion binding	0.544438	4.90978e-06	0.585052	7.20856e-08	0.428133	0.00130372
Bcin12g06380.1	0.503475	0	BcBOT1, CND5p	F:oxidoreductase activity; F:ion binding	0.635201	0	0.683532	0	0.62169	0
Bcin06g00620.1	0.502866	0	tripeptidyl peptidase a	F:peptidase activity	0.554205	2.93796e-06	0.496609	2.55412e-05	0.43847	0.000899407
Bcin15g03870.1	0.496585	0	[Botrytis cinerea ]	P:carbohydrate metabolic process; C:extracellular region; F:hydrolase activity, acting on glycosyl bonds	0.230602	0.101028	0.494547	2.8117e-05	0.374281	0.00647636
Bcin09g01110.1	0.492608	0	hypothetical protein BC1G_14702	P:carbohydrate metabolic process; F:hydrolase activity, hydrolyzing O-glycosyl compounds; C:extracellular region; F:cellulose binding	0.522992	1.50091e-05	0.553079	1.81917e-06	0.436028	0.000998066
Bcin06g04940.1	0.490483	0	retinol dehydrogenase 8	no GO terms	0.559645	2.18705e-06	0.617092	0	0.558071	4.21931e-06
Bcin09g06750.1	0.48824	0	glycoside hydrolase family 61	F:molecular_function	0.447545	0.000374446	0.495496	2.71178e-05	0.331877	0.019604
Bcin01g05960.1	0.484281	0	pth11-like integral membrane	C:cellular_component	0.31602	0.0176543	0.660241	0	0.479219	0.000197463
Bcin12g06430.1	0.484222	0	BcBOT7, short-chain dehydrogenase reductase SDR [Botrytis cinerea T4]	C:cellular_component	0.580141	4.80826e-07	0.65662	0	0.613185	0
Bcin12g01030.1	0.483404	0	DUF1275 domain [Botrytis cinerea T4]	C:cellular_component	0.314284	0.0184068	0.490423	3.3507e-05	0.503228	6.73317e-05
Bcin05g08330.1	0.48016	0	carbohydrate esterase family 12 [Botrytis cinerea T4]	F:molecular_function	0.34669	0.00834129	0.561517	1.07955e-06	0.45704	0.000471663
Bcin01g04580.2	0.480032	0	hypothetical protein BofuT4_P163510.1	no GO terms	0.568747	1.40694e-06	0.493828	2.87617e-05	0.452184	0.000554946
Bcin08g05200.1	0.475266	0	cytochrome p450 alkane hydroxylase	F:oxidoreductase activity; F:ion binding; C:cellular_component	0.563158	1.69239e-06	0.592512	0	0.625163	0
Bcin14g00850.1	0.472012	0	endo-polygalacturonase precursor [Botrytis cinerea ]	P:carbohydrate metabolic process; P:cell wall organization or biogenesis; C:extracellular region; F:hydrolase activity, acting on glycosyl bonds	0.52732	1.24944e-05	0.512575	1.23273e-05	0.485038	0.000149942
Bcin09g02640.1	0.471153	0	glycoside hydrolase family 3 [Botrytis cinerea T4]	P:carbohydrate metabolic process; P:catabolic process; F:hydrolase activity, acting on glycosyl bonds	0.417892	0.00101505	0.508397	1.47361e-05	0.445795	0.000708469
Bcin06g01060.1	0.4704	0	hypothetical protein BC1G_01082 [Botrytis cinerea B05.10]	C:cellular_component	0.600122	0	0.498833	2.33116e-05	0.554083	4.88142e-06
Bcin05g04960.1	0.464575	0	nitrilase [Botrytis cinerea T4]	F:hydrolase activity, acting on carbon-nitrogen (but not peptide) bonds; P:biological_process	0.340301	0.00978728	0.578812	2.31604e-07	0.384482	0.0048875
Bcin08g02680.1	0.460858	0	scp-like extracellular [Botrytis cinerea 1]	no GO terms	0.497409	5.31673e-05	0.460038	0.000117018	0.434753	0.00104402
Bcin02g01580.1	0.460385	0	CAIB BAIF family enzyme	F:molecular_function	0.325977	0.0139322	0.586489	4.49135e-08	0.2363	0.118624
Bcin04g02970.1	0.457451	0	chorismate synthase [Botrytis cinerea T4]	P:aromatic amino acid family biosynthetic process; F:chorismate synthase activity; P:chorismate biosynthetic process	0.30118	0.0250498	0.431864	0.000301329	0.208342	0.176958
Bcin02g00420.2	0.457301	0	glycoside hydrolase family 3	P:carbohydrate metabolic process; P:transmembrane transport; C:cellular_component; F:hydrolase activity, acting on glycosyl bonds	0.297301	0.0272699	0.529409	5.68533e-06	0.3887	0.00444488
Bcin08g03320.1	0.456011	0	extracellular conserved serine-rich [Botrytis cinerea 1]	no GO terms	0.508912	3.09731e-05	0.430331	0.000315768	0.376099	0.00617963
Bcin06g02540.1	0.453751	0	rpel repeat [Botrytis cinerea 1]	no GO terms	0.18459	0.208427	0.331131	0.00617166	0.165735	0.300487
Bcin12g02040.1	0.45003	0	aspartic protease precursor (secreted ) [Botrytis cinerea T4]	F:peptidase activity	0.360038	0.00601106	0.459156	0.000120017	0.420591	0.00168477
Bcin08g03610.1	0.449516	0	subunit IV of cytochrome c oxidase [Botrytis cinerea ]	F:transmembrane transporter activity; F:oxidoreductase activity; C:mitochondrion	0.228161	0.105679	0.445307	0.000197033	0.279151	0.0575321
Bcin16g02790.1	0.447633	0	peptidase activity	F:peptidase activity	0.356877	0.00650913	0.555222	1.57069e-06	0.420334	0.00168477
Bcin10g05710.1	0.446593	0	glycoside hydrolase family 32 [Botrytis cinerea T4]	P:carbohydrate metabolic process; F:hydrolase activity, acting on glycosyl bonds	0.605155	0	0.418475	0.000467067	0.42382	0.00151871
Bcin03g04010.1	0.446421	0	endo-beta-1,4-glucanase precursor [Botrytis cinerea]	F:molecular_function	0.408627	0.00141185	0.562642	1.03313e-06	0.324064	0.0232914
Bcin12g01780.1	0.445828	0	isopentenyl-diphosphate delta-isomerase [Botrytis cinerea 1]	F:isopentenyl-diphosphate delta-isomerase activity; P:isoprenoid biosynthetic process; F:hydrolase activity	0.469493	0.000164483	0.631457	0	0.586829	9.59518e-08
Bcin12g06410.1	0.445313	0	BcBOT5,BCL5p	F:transferase activity, transferring acyl groups	0.574552	8.70257e-07	0.692973	0	0.611978	0
Bcin12g06400.1	0.444767	0	BcBOT3,CND11p	F:oxidoreductase activity; F:ion binding; C:cellular_component	0.647613	0	0.686666	0	0.637805	0
Bcin02g03090.1	0.443326	0	glycoside hydrolase family 1	P:carbohydrate metabolic process; F:hydrolase activity, acting on glycosyl bonds	0.422016	0.000874753	0.550054	2.06754e-06	0.267254	0.0712775
Bcin11g02730.1	0.442763	0	CDP-alcohol phosphatidyltransferase [Botrytis cinerea ]	no GO terms	0.368421	0.00475023	0.207976	0.0903264	0.092051	0.5959
Bcin10g05700.1	0.440519	0	[Botrytis cinerea ]	no GO terms	0.376492	0.00371653	0.467037	9.05318e-05	0.355955	0.0107148
Bcin03g02510.1	0.438527	0	hypothetical protein BC1G_06572	F:protein binding	0.411096	0.00130548	0.37675	0.00176119	0.315681	0.0278323
Bcin04g05820.1	0.436494	0	R3H domain-containing [Botrytis cinerea T4]	F:molecular_function	0.409183	0.00139568	0.313402	0.00949452	0.26035	0.0790396
Bcin09g04490.1	0.435797	0	acid trehalase	P:carbohydrate metabolic process; F:catalytic activity; F:carbohydrate binding	0.594194	0	0.40544	0.00070543	0.456186	0.000484808
Bcin01g06210.1	0.435729	0	putative carboxypeptidase protein	F:peptidase activity	0.493258	6.47796e-05	0.538321	3.81404e-06	0.505033	6.19629e-05
Bcin01g05970.1	0.435547	0	hypothetical protein BofuT4_P045910.1	F:transferase activity, transferring acyl groups	0.154314	0.307758	0.488443	3.58546e-05	0.355263	0.0109293
Bcin08g03320.2	0.43505	0	extracellular conserved serine-rich [Botrytis cinerea 1]	no GO terms	0.502252	4.3623e-05	0.466101	9.32897e-05	0.36111	0.0091958
Bcin10g02960.1	0.43452	0	duf1295 domain	C:cellular_component	0.334034	0.0113325	0.24334	0.0462818	0.161869	0.313803
Bcin02g06910.1	0.4331	0	cell wall glucanase	P:carbohydrate metabolic process; F:hydrolase activity, acting on glycosyl bonds	0.459143	0.000244024	0.443692	0.000206279	0.366915	0.00784432
Bcin09g03850.1	0.431542	0	putative transaldolase protein	P:small molecule metabolic process; P:carbohydrate metabolic process; P:cofactor metabolic process; P:cellular nitrogen compound metabolic process; F:molecular_function	0.314989	0.0180543	0.503717	1.83763e-05	0.392675	0.00400959
Bcin05g02520.1	0.431466	0	glycoside hydrolase family 28 [Botrytis cinerea T4]	P:carbohydrate metabolic process; P:cell wall organization or biogenesis; C:extracellular region; F:hydrolase activity, acting on glycosyl bonds	0.394642	0.00219307	0.504761	1.73652e-05	0.339826	0.0162444
Bcin15g04670.1	0.431465	0	serine-type peptidase activity	P:proteolysis; F:serine-type peptidase activity; F:serine-type endopeptidase activity	0.328852	0.0128118	0.5406	3.45473e-06	0.374335	0.00647636
Bcin06g01600.1	0.430522	0	glycosyl hydrolase family 43 [Botrytis cinerea 1]	P:carbohydrate metabolic process; F:hydrolase activity, acting on glycosyl bonds	0.400312	0.00182407	0.602604	0	0.548359	5.87603e-06
Bcin12g03710.1	0.429587	1.03e-13	hypothetical protein BC1G_08717	F:protein binding	0.380073	0.00331154	0.486069	4.01026e-05	0.228527	0.133139
Bcin15g03150.1	0.427191	1.68e-12	sedolisin [Botrytis cinerea T4]	P:proteolysis; F:serine-type endopeptidase activity	0.457691	0.000255754	0.5664	8.81766e-07	0.458152	0.000450461
Bcin06g04500.1	0.426908	1.89e-12	BGALB_BOTFB ame: Full=Probable beta-galactosidase B ame: Full=Lactase B Flags: Precursor	P:carbohydrate metabolic process; P:catabolic process; C:extracellular region; F:hydrolase activity, acting on glycosyl bonds	0.336205	0.0108386	0.477727	5.7852e-05	0.494276	9.93404e-05
Bcin12g06390.1	0.426504	2.21e-12	BcBOT2, BOT2_BOTFU, Calcineurin-dependent 15, Sesquiterpene cyclase BOT2	P:lipid metabolic process; F:ion binding; F:lyase activity; P:biosynthetic process	0.657013	0	0.72146	0	0.647084	0
Bcin02g09320.1	0.424779	4.03e-12	casein kinase substrate phospho pp28 [Botrytis cinerea 1]	F:kinase activity	0.11484	0.474812	0.440898	0.000226058	0.256158	0.0835627
Bcin16g01550.1	0.424328	4.54e-12		no GO terms	0.332596	0.0117104	0.413321	0.000560374	0.113158	0.502392
Bcin08g03300.1	0.424072	4.81e-12	hypothetical protein BofuT4_P132080.1 [Botrytis cinerea T4]	no GO terms	0.268977	0.0490406	0.367417	0.00230774	0.13025	0.433321
Bcin04g06730.1	0.423917	4.95e-12	[Botrytis cinerea ]	no GO terms	0.389528	0.00261216	0.236788	0.052726	0.036096	0.855451
Bcin01g04580.1	0.423379	5.64e-12	hypothetical protein BofuT4_P163510.1	no GO terms	0.553961	2.93796e-06	0.51271	1.23273e-05	0.402292	0.00302333
Bcin12g06180.1	0.423295	5.68e-12	cyanide hydratase [Botrytis cinerea ]	F:hydrolase activity, acting on carbon-nitrogen (but not peptide) bonds; P:nitrogen compound metabolic process	0.356294	0.00656889	0.495103	2.73827e-05	0.47481	0.000229997
Bcin02g05300.1	0.422836	6.3e-12	major royal jelly [Botrytis cinerea T4]	no GO terms	0.480914	0.000109797	0.549078	2.14087e-06	0.440342	0.000851258
Bcin03g06290.2	0.420619	1.05e-11	transcription factor CBF NF-Y [Botrytis cinerea T4]	C:CCAAT-binding factor complex; F:transcription factor activity, sequence-specific DNA binding; F:protein heterodimerization activity; P:regulation of transcription, DNA-templated	0.0897721	0.598461	0.534007	4.76885e-06	0.119655	0.475352
Bcin06g00024.1	0.420402	1.09e-11	zn-dependent hydrolases of the beta-lactamase	F:molecular_function	0.464881	0.000189193	0.541101	3.38951e-06	0.560445	3.74723e-06
Bcin12g06630.1	0.419251	1.37e-11	glycoside hydrolase family 45 [Botrytis cinerea T4]	P:carbohydrate metabolic process; F:cellulase activity	0.37481	0.00390002	0.432759	0.000295651	0.386137	0.00470895
Bcin08g04020.1	0.419141	1.38e-11	glucose-methanol-choline oxidoreductase [Botrytis cinerea T4]	F:oxidoreductase activity; F:ion binding	0.45057	0.00033495	0.388416	0.00123426	0.410106	0.0023081
Bcin11g01090.1	0.41862	1.51e-11	predicted protein	no GO terms	0.541183	5.84762e-06	0.470144	7.96129e-05	0.381823	0.00532287
Bcin12g00740.1	0.418174	1.63e-11	hypothetical protein BC1G_03502	no GO terms	0.254137	0.0650609	0.450203	0.000167841	0.363416	0.00865566
Bcin02g01590.1	0.418079	1.64e-11	hypothetical protein BofuT4_P108750.1	no GO terms	0.146053	0.341015	0.59646	0	0.277035	0.0596662
Bcin07g04690.1	0.417333	1.85e-11	ATP synthase gamma chain [Botrytis cinerea T4]	F:ATPase activity; P:small molecule metabolic process; F:transmembrane transporter activity; C:protein complex; P:cellular nitrogen compound metabolic process; P:biosynthetic process; C:intracellular	0.164474	0.272109	0.395429	0.000987864	0.125448	0.45158
Bcin14g05560.1	0.41731	1.85e-11	epoxide hydrolase	F:molecular_function	0.465884	0.000183528	0.454788	0.00014072	0.418584	0.00177039
Bcin06g02760.1	0.41623	2.24e-11	nipsnap family [Botrytis cinerea T4]	no GO terms	0.342784	0.00913691	0.362249	0.002671	0.258315	0.0814353
Bcin11g05710.1	0.415471	2.54e-11	oligosaccharyltransferase alpha subunit [Botrytis cinerea ]	F:transferase activity, transferring glycosyl groups; P:cellular protein modification process; C:endoplasmic reticulum; P:biosynthetic process	0.286082	0.034592	0.332393	0.00596406	0.0815654	0.645089
Bcin04g00600.1	0.414793	2.84e-11	phosphoribulokinase uridine kinase family [Botrytis cinerea T4]	F:ion binding; F:kinase activity	0.477306	0.000121057	0.565667	8.85061e-07	0.405819	0.00269662
Bcin04g05410.1	0.413689	3.37e-11	peptide-n4-(n-acetyl-beta-glucosaminyl)asparagine amidase a [Botrytis cinerea 1]	C:cellular_component	0.549444	3.73389e-06	0.466766	9.09378e-05	0.445456	0.00071295
Bcin06g02890.1	0.413663	3.37e-11	40S ribosomal S27	F:structural constituent of ribosome; C:intracellular ribonucleoprotein complex; C:cytosolic small ribosomal subunit; F:metal ion binding; P:ribosomal small subunit assembly; C:ribosome; C:intracellular; P:translation	0.138904	0.3709	0.368462	0.00222958	0.111055	0.511097
Bcin03g00480.1	0.412699	3.93e-11	XY11A_BOTFU ame: Full=Endo-1,4-beta-xylanase 11A Short=Xylanase 11A ame: Full=1,4-beta-D-xylan xylanohydrolase 11A Flags: Precursor	P:carbohydrate metabolic process; P:catabolic process; P:cell wall organization or biogenesis; C:extracellular region; F:hydrolase activity, acting on glycosyl bonds	0.555412	2.83621e-06	0.550705	2.00742e-06	0.520917	2.72754e-05
Bcin08g00720.1	0.411071	5.11e-11	pepsin [Botrytis cinerea T4]	F:peptidase activity	0.571243	1.16848e-06	0.587778	2.29831e-08	0.488768	0.000128562
Bcin12g01020.1	0.409265	6.78e-11	oxaloacetate [Botrytis cinerea 1]	F:catalytic activity; P:metabolic process	0.256131	0.0629576	0.48337	4.53117e-05	0.370998	0.00705422
Bcin11g05700.1	0.407227	9.26e-11	hexokinase [Botrytis cinerea ]	F:glucose binding; C:cell; F:ATP binding; P:cellular glucose homeostasis; P:glycolytic process; F:hexokinase activity; P:carbohydrate phosphorylation	0.37595	0.00378528	0.271215	0.0256225	0.133912	0.416332
Bcin10g03090.1	0.406983	9.5e-11		F:pyridoxal phosphate binding; F:catalytic activity; P:metabolic process; P:tetrapyrrole biosynthetic process; P:biosynthetic process; F:5-aminolevulinate synthase activity; F:transferase activity	0.470008	0.000161351	0.436435	0.000261583	0.390518	0.00428262
Bcin12g01440.1	0.406016	1.09e-10	MFS sugar transporter	F:substrate-specific transmembrane transporter activity; P:transmembrane transport; C:integral component of membrane; P:carbohydrate transport	0.434957	0.0005536	0.345768	0.00418224	0.28904	0.0477553
Bcin13g00300.1	0.404084	1.45e-10	hypothetical protein BcDW1_977	no GO terms	0.479327	0.00011373	0.52268	7.91827e-06	0.452781	0.000554012
Bcin14g04210.1	0.403208	1.63e-10	hypothetical protein BC1G_13574	no GO terms	0.182366	0.215395	0.336327	0.00534323	0.365193	0.0081817
Bcin04g05580.1	0.402641	1.75e-10	GPI anchored dioxygenase [Botrytis cinerea T4]	F:oxidoreductase activity; F:ion binding	0.288985	0.0326232	0.457094	0.000129065	0.228676	0.132824
Bcin02g04230.1	0.40166	2e-10	hypothetical protein BcDW1_4078	no GO terms	0.168719	0.257858	0.333492	0.00576414	0.396432	0.00364823
Bcin12g00300.1	0.401002	2.18e-10	glycoside hydrolase family 35 [Botrytis cinerea T4]	P:carbohydrate metabolic process; F:hydrolase activity, hydrolyzing O-glycosyl compounds	0.506253	3.59051e-05	0.498277	2.37615e-05	0.5172	3.35496e-05
Bcin11g00080.1	0.400396	2.33e-10	hypothetical protein BC1G_09686	F:hydrolase activity	0.0913049	0.591331	0.490383	3.3507e-05	0.273426	0.063586
Bcin05g06140.1	0.400383	2.33e-10	RGS domain (Rax1) [Botrytis cinerea T4]	C:cellular_component	0.29319	0.0299647	0.390084	0.00118395	0.152537	0.346232
Bcin03g03310.1	0.399902	2.47e-10	ndt80 like dna-binding family [Botrytis cinerea 1]	F:DNA binding; F:nucleic acid binding transcription factor activity; P:cellular nitrogen compound metabolic process; P:biosynthetic process	0.242675	0.0812056	0.426085	0.00035946	0.222965	0.144929
Bcin02g07410.1	0.399785	2.49e-10		F:binding	0.299335	0.0261579	0.360201	0.00280994	0.149973	0.35572
Bcin12g06420.1	0.399368	2.61e-10	BcBOT6, transcription factor cys6	C:nucleus; F:nucleic acid binding transcription factor activity; F:ion binding; P:cellular nitrogen compound metabolic process; P:biosynthetic process	0.639121	0	0.63478	0	0.594425	0
Bcin02g06940.1	0.399268	2.62e-10	beta-1-3-glucanosyltransferase [Botrytis cinerea ]	P:carbohydrate metabolic process; C:plasma membrane; F:molecular_function	0.466373	0.00018179	0.270578	0.0259971	0.139962	0.391869
Bcin01g10530.1	0.398887	2.74e-10	hypothetical protein BC1G_05244	no GO terms	0.447314	0.000376502	0.629761	0	0.52169	2.68573e-05
Bcin04g05790.1	0.398798	2.74e-10	mitochondrial 54S ribosomal 8 [Botrytis cinerea ]	F:structural constituent of ribosome; C:ribosome; P:translation	0.32439	0.0144417	0.263551	0.03021	0.224281	0.142075
Bcin12g06370.1	0.398713	2.75e-10	BcBOT4, BCL4p	F:oxidoreductase activity; F:ion binding; C:cellular_component	0.593557	0	0.714365	0	0.633519	0
Bcin11g03940.1	0.398112	2.96e-10		no GO terms	0.317906	0.0169214	0.261164	0.0318321	-0.0500407	0.795027
Bcin05g01750.1	0.39794	3.01e-10	putative nima-interacting protein	no GO terms	0.262113	0.0559801	0.52987	5.59555e-06	0.421785	0.00163681
Bcin03g02320.1	0.397647	3.1e-10	EIF3L_BOTFB ame: Full=Eukaryotic translation initiation factor 3 subunit L Short=eIF3l	F:translation initiation factor activity; P:formation of translation preinitiation complex; C:eukaryotic 43S preinitiation complex; C:integral component of membrane; C:eukaryotic 48S preinitiation complex; P:regulation of translational initiation; C:eukaryotic translation initiation factor 3 complex	0.0930819	0.582497	0.411842	0.000582974	0.125515	0.451362
Bcin01g03820.1	0.397108	3.31e-10	cell wall glucanase	P:carbohydrate metabolic process	0.265966	0.0518681	0.454978	0.000140319	0.198996	0.200087
Bcin16g00180.1	0.396727	3.46e-10	[Sclerotinia sclerotiorum 1980]	C:cellular_component	0.284211	0.035935	0.495374	2.71276e-05	0.393706	0.00388828
Bcin03g06290.1	0.396524	3.51e-10	transcription factor CBF NF-Y [Botrytis cinerea T4]	C:nucleus; F:nucleic acid binding transcription factor activity; C:protein complex; P:cellular nitrogen compound metabolic process; P:biosynthetic process	0.0180819	0.932618	0.429015	0.000324742	0.12732	0.443473
Bcin10g02280.1	0.396494	3.51e-10	putative glycogenin protein	F:transferase activity, transferring glycosyl groups	0.290518	0.0317127	0.35373	0.00338142	0.143964	0.378715
Bcin01g02420.1	0.396329	3.56e-10	glycylpeptide N-tetradecanoyltransferase [Botrytis cinerea T4]	F:transferase activity, transferring acyl groups; P:cellular protein modification process; P:biosynthetic process	0.270619	0.0475465	0.452509	0.000154694	0.119886	0.47477
Bcin03g05230.1	0.396213	3.56e-10	MFS multidrug transporter [Botrytis cinerea T4]	P:transmembrane transport; C:integral component of membrane	0.224674	0.112249	0.532908	4.99817e-06	0.349769	0.0123963
Bcin11g02280.1	0.396176	3.56e-10	glycoside hydrolase family 5 [Botrytis cinerea T4]	P:carbohydrate metabolic process; F:hydrolase activity, hydrolyzing O-glycosyl compounds	0.491373	6.98599e-05	0.512168	1.2503e-05	0.489745	0.000124128
Bcin07g03980.1	0.395513	3.87e-10	hypothetical protein BofuT4P90000026001	no GO terms	0.376696	0.00370171	0.269967	0.0263739	0.10548	0.536233
Bcin05g03680.1	0.394099	4.67e-10	[Botrytis cinerea ]	no GO terms	0.401356	0.00175631	0.505833	1.65107e-05	0.420076	0.00168477
Bcin04g01460.1	0.393519	5.02e-10	cAMP-regulated phospho family Igo1 [Botrytis cinerea T4]	no GO terms	0.0857434	0.617402	0.351058	0.00363838	0.232813	0.124515
Bcin06g01020.1	0.393368	5.08e-10	WD repeat	F:protein binding	0.0193977	0.927403	0.247802	0.0420107	0.262453	0.0764708
Bcin09g01650.1	0.393011	5.28e-10	ankyrin repeat and btb poz domain [Botrytis cinerea 1]	F:protein binding	0.260377	0.0581587	0.390071	0.00118395	0.226804	0.13682
Bcin07g02220.1	0.392763	5.42e-10		F:ATPase activity; F:ATP binding; F:ATPase activity, coupled to transmembrane movement of substances; C:membrane; C:integral component of membrane; P:transport	0.601275	0	0.525339	6.79596e-06	0.532691	1.4404e-05
Bcin02g01680.1	0.392456	5.6e-10		F:transferase activity, transferring acyl groups; F:oxidoreductase activity; F:catalytic activity; P:metabolic process; P:oxidation-reduction process; F:phosphopantetheine binding	0.345931	0.00847092	0.216359	0.0779901	0.171215	0.28126
Bcin07g01290.1	0.391733	6.13e-10	heat shock Hsp88 [Botrytis cinerea T4]	F:nucleotide binding; F:ATP binding	0.119764	0.451683	0.371867	0.00200729	0.194913	0.212006
Bcin04g01310.1	0.391318	6.38e-10	gpi-anchored cell wall organization ecm33 [Botrytis cinerea 1]	no GO terms	0.262344	0.0558168	0.216617	0.0776286	0.0062127	0.978076
Bcin06g00026.1	0.391298	6.38e-10	riboflavin transporter mch5	P:transmembrane transport; C:cellular_component	0.413334	0.0012022	0.463171	0.000104239	0.516237	3.45411e-05
Bcin08g00350.1	0.391243	6.38e-10	hypothetical protein BcDW1_5912	no IPS match	0.403907	0.00160985	0.529883	5.59555e-06	0.375977	0.00618829
Bcin03g02310.1	0.391083	6.46e-10	importin alpha re-exporter [Botrytis cinerea T4]	F:protein binding; P:intracellular protein transport; F:binding; F:Ran GTPase binding	0.179436	0.223744	0.265355	0.0290508	0.00759631	0.973578
Bcin03g07370.1	0.390951	6.52e-10	hypothetical protein BC1G_11688 [Botrytis cinerea B05.10]	C:membrane; C:integral component of membrane	0.476207	0.000124541	0.262914	0.0306552	0.389107	0.00440719
Bcin04g06650.1	0.390642	6.75e-10	hypothetical protein BofuT4P3000025001 [Botrytis cinerea T4]	no GO terms	0.441305	0.0004469	0.341617	0.00467331	0.122056	0.465809
Bcin12g00280.1	0.390446	6.87e-10	phosphoserine phosphatase	F:phosphatase activity	0.361042	0.00589368	0.233261	0.056343	0.293516	0.0436904
Bcin15g03120.1	0.390322	6.93e-10	farnesyl diphosphate synthase [Botrytis cinerea]	P:isoprenoid biosynthetic process; F:transferase activity	0.424078	0.000809101	0.716983	0	0.575285	9.41996e-07
Bcin10g05590.1	0.389555	7.62e-10	glycoside hydrolase family 3 [Botrytis cinerea T4]	P:carbohydrate metabolic process; F:hydrolase activity, acting on glycosyl bonds	0.231199	0.0998871	0.413551	0.000556662	0.32127	0.0243871
Bcin13g00990.1	0.389185	7.94e-10	vhs domain-containing	F:ion binding; P:transport; C:intracellular	0.370347	0.00446828	0.240355	0.049123	0.281782	0.0546737
Bcin03g03460.1	0.387892	9.37e-10	hypothetical protein BC1G_00571	P:transmembrane transport; C:integral component of membrane	0.535092	8.72215e-06	0.472246	7.18715e-05	0.383125	0.00511728
Bcin02g07420.1	0.386653	1.1e-09	cbs domain containing [Botrytis cinerea 1]	P:chromosome organization; P:chromosome segregation; P:mitotic nuclear division; P:mitotic cell cycle; P:response to stress	0.278622	0.0404358	0.140789	0.263237	0.238565	0.114291
Bcin09g01790.1	0.385941	1.19e-09	[Botrytis cinerea ]	no IPS match	0.304368	0.0233173	0.375393	0.00181892	0.177754	0.260099
Bcin04g04080.1	0.385558	1.25e-09	hypothetical protein BofuT4_P095450.1	C:cellular_component	0.439677	0.000474572	0.329571	0.00644409	0.173521	0.274937
Bcin13g05810.1	0.384576	1.41e-09	aldehyde dehydrogenase [Botrytis cinerea T4]	F:oxidoreductase activity	0.233736	0.0955191	0.516291	1.01624e-05	0.364786	0.00829247
Bcin11g06370.2	0.384491	1.41e-09	hypothetical protein BC1G_12871	no GO terms	0.446839	0.000381496	0.306511	0.0113398	0.348956	0.0126456
Bcin06g05180.1	0.38433	1.43e-09	hypothetical protein BofuT4_P141560.1	F:binding	0.222911	0.11578	0.464664	9.77114e-05	0.285214	0.0515456
Bcin03g05820.1	0.382749	1.74e-09	pectate lyase a [Botrytis cinerea 1]	P:polysaccharide catabolic process; F:lyase activity; C:extracellular region	0.370225	0.00448139	0.40175	0.000802794	0.358044	0.0101795
Bcin07g01290.2	0.38146	2.05e-09	Heat shock Hsp88	C:nucleus; F:ion binding; C:cytosol	0.105996	0.517709	0.335092	0.0055253	0.231593	0.126905
Bcin04g01150.1	0.380635	2.26e-09	dolichyl-diphosphooligosaccharide- glycotransferase [Botrytis cinerea 1]	C:cellular_component; F:molecular_function	0.355819	0.00662637	0.387235	0.00127922	0.229002	0.132235
Bcin03g00900.1	0.380583	2.26e-09	hypothetical protein BC1G_02113	C:integral component of membrane	0.269737	0.0483148	0.462561	0.000105544	0.26545	0.0732377
Bcin12g04570.1	0.379889	2.43e-09	phosphomevalonate kinase	F:ion binding; F:kinase activity	0.445564	0.000394115	0.552157	1.91213e-06	0.468462	0.000297789
Bcin04g06230.1	0.379583	2.51e-09	Bcfhg1, Detoxification of nitric oxide; oxidoreductase FAD NAD(P)-binding domain [Botrytis cinerea T4]	F:oxidoreductase activity	0.28379	0.0362229	0.321772	0.00773125	0.162059	0.313275
Bcin10g04620.1	0.379405	2.54e-09	F-box WD repeat-containing 1A [Botrytis cinerea T4]	F:protein binding	0.402008	0.00171046	0.426913	0.000347375	0.334156	0.0187035
Bcin10g03240.1	0.379359	2.54e-09	KH domain RNA-binding [Botrytis cinerea T4]	F:RNA binding	0.177428	0.229933	0.285608	0.0184544	0.224023	0.142545
Bcin02g01660.1	0.379322	2.54e-09	amino acid transporter [Botrytis cinerea T4]	C:cellular_component	0.528079	1.23105e-05	0.517146	1.01001e-05	0.395551	0.0036933
Bcin02g01560.1	0.379123	2.58e-09	benzoylformate decarboxylase [Botrytis cinerea 1]	no GO terms	0.146514	0.338537	0.280195	0.0209044	0.257528	0.0822695
Bcin07g01720.1	0.378838	2.66e-09	dipeptidyl-peptidase V (secreted )	F:peptidase activity	0.205819	0.151784	0.219086	0.0740887	0.361096	0.0091958
Bcin13g04510.1	0.37848	2.77e-09	5 -3 exoribonuclease 2	F:nucleic acid binding; C:nucleus; F:5'-3' exoribonuclease activity; P:RNA phosphodiester bond hydrolysis, exonucleolytic; F:zinc ion binding	0.270293	0.0477829	0.156877	0.210327	0.141115	0.387164
Bcin05g00830.1	0.378211	2.84e-09	mitochondrial inner membrane 1 [Botrytis cinerea]	C:integral component of membrane	0.42032	0.000941431	0.25666	0.0350724	0.247056	0.0993115
Bcin02g07100.1	0.377983	2.9e-09	carbohydrate esterase family 12 [Botrytis cinerea T4]	no GO terms	0.4043	0.00158829	0.482976	4.60922e-05	0.380969	0.00545405
Bcin09g02350.1	0.377902	2.9e-09	serine carboxypeptidase ( ) (secreted ) [Botrytis cinerea T4]	F:peptidase activity	0.411937	0.00127254	0.368543	0.00222774	0.292119	0.0447236
Bcin05g02410.1	0.377893	2.9e-09	choline dehydrogenase	F:oxidoreductase activity, acting on CH-OH group of donors; F:flavin adenine dinucleotide binding; P:oxidation-reduction process	0.160214	0.28653	0.453595	0.000148338	0.256009	0.0838562
Bcin02g00960.1	0.37759	2.99e-09	mgs207 [Botrytis cinerea 1]	no GO terms	0.207759	0.147614	0.434902	0.000274307	0.224851	0.141102
Bcin07g06380.1	0.376774	3.3e-09	---NA---	no GO terms	0.277835	0.0411658	0.32264	0.00758179	0.270971	0.0663757
Bcin06g05570.1	0.376645	3.33e-09	predicted protein	no GO terms	0.304992	0.0229832	0.415328	0.000525626	0.381565	0.00535996
Bcin02g06500.1	0.376511	3.36e-09	EIF3K_BOTFB ame: Full=Eukaryotic translation initiation factor 3 subunit K Short=eIF3k ame: Full=eIF-3 p25	F:translation initiation factor activity; P:formation of translation preinitiation complex; F:RNA binding; C:cytoplasm; C:eukaryotic 43S preinitiation complex; F:ribosome binding; C:eukaryotic 48S preinitiation complex; P:regulation of translational initiation; P:translational initiation; C:eukaryotic translation initiation factor 3 complex; P:translation	0.235567	0.0926037	0.483858	4.46613e-05	0.293082	0.043932
Bcin11g00370.1	0.376074	3.53e-09	pre-mRNA splicing factor [Botrytis cinerea ]	F:molecular_function	0.341237	0.00949581	0.182406	0.140785	0.276411	0.0600405
Bcin01g00740.1	0.375885	3.59e-09	hypothetical protein BC1G_14342	no GO terms	0.417689	0.00102084	0.221934	0.070012	0.297179	0.0407337
Bcin09g06520.1	0.375834	3.59e-09	phosphoglycerate mutase family [Botrytis cinerea T4]	no GO terms	0.446636	0.000382548	0.345117	0.00425627	0.383939	0.00498241
Bcin06g05670.1	0.375738	3.61e-09	hypothetical protein BC1G_02230	F:FAD binding; F:oxidoreductase activity; P:oxidation-reduction process	0.08965	0.598597	0.230887	0.0591035	0.131009	0.429983
Bcin03g09210.1	0.37435	4.27e-09	carboxy-cis,cis-muconate cyclase [Botrytis cinerea T4]	F:protein binding	0.430697	0.000624478	0.559333	1.2348e-06	0.353947	0.0112471
Bcin07g03280.1	0.374168	4.34e-09	gdsl lipase acylhydrolase family	F:molecular_function	0.235608	0.0925477	0.410377	0.000608511	0.346188	0.0138032
Bcin06g02380.1	0.372516	5.29e-09	UDP-4-keto-6-deoxyglucose-3,5-epimerase -4-reductase [Botrytis cinerea]	no GO terms	0.168706	0.257858	0.276316	0.0228566	-0.0140532	0.950081
Bcin06g01490.1	0.371647	5.86e-09	MFS multidrug transporter [Botrytis cinerea T4]	P:transmembrane transport; C:cellular_component	0.523196	1.50091e-05	0.407854	0.000658714	0.377428	0.00602281
Bcin14g05510.1	0.371285	6.09e-09	glycoside hydrolase family 62 [Botrytis cinerea T4]	P:L-arabinose metabolic process; F:alpha-L-arabinofuranosidase activity; F:hydrolase activity	0.486489	8.26604e-05	0.436896	0.000258235	0.50099	7.51436e-05
Bcin05g06280.1	0.371138	6.16e-09	nadp-dependent leukotriene b4 12-hydroxydehydrogenase	F:zinc ion binding; F:oxidoreductase activity; P:oxidation-reduction process	0.347518	0.00819316	0.477564	5.79508e-05	0.443055	0.000780866
Bcin14g01070.1	0.370632	6.52e-09	alcohol dehydrogenase groes domain [Botrytis cinerea T4]	F:zinc ion binding; F:oxidoreductase activity; P:oxidation-reduction process	0.48771	8.13012e-05	0.429327	0.000321699	0.510092	4.65277e-05
Bcin05g02590.1	0.36981	7.14e-09		F:histone deacetylase activity; P:histone deacetylation	0.497545	5.31673e-05	0.225421	0.065526	0.281796	0.0546737
Bcin03g02370.1	0.369787	7.14e-09	membrane biogenesis Yop1 [Botrytis cinerea T4]	C:cellular_component	0.356579	0.00654798	0.488673	3.58546e-05	0.281633	0.0548127
Bcin08g00280.1	0.369188	7.59e-09	carboxypeptidase S1 (secreted ) [Botrytis cinerea T4]	F:peptidase activity	0.18946	0.194727	0.473833	6.9057e-05	0.22131	0.148246
Bcin11g02240.1	0.369051	7.67e-09	glycerol-3-phosphate phosphatase [Botrytis cinerea T4]	P:biological_process; F:molecular_function	0.220225	0.120718	0.31522	0.0090688	0.33147	0.0196654
Bcin10g06100.1	0.3689	7.77e-09	mfs allantoate	no GO terms	0.303663	0.0237425	0.412819	0.000565107	0.273481	0.0635846
Bcin08g04540.1	0.368371	8.24e-09	pyruvate dehydrogenase E1 component beta subunit [Botrytis cinerea ]	P:small molecule metabolic process; P:sulfur compound metabolic process; F:oxidoreductase activity; P:cofactor metabolic process; P:biosynthetic process	0.321026	0.0156846	0.358261	0.00295683	0.0454015	0.816836
Bcin12g06120.1	0.367988	8.58e-09	hypothetical protein BofuT4_P068250.1 [Botrytis cinerea T4]	no GO terms	0.480046	0.00011091	0.524512	7.09746e-06	0.496541	8.88218e-05
Bcin10g03900.1	0.367167	9.43e-09	hypothetical protein BcDW1_1614	no GO terms	0.142648	0.354287	0.378676	0.00165767	0.324186	0.0232762
Bcin02g08790.1	0.36711	9.44e-09	[Botrytis cinerea ]	F:oxidoreductase activity	0.47774	0.000120417	0.671663	0	0.556891	4.31543e-06
Bcin13g00770.1	0.366806	9.74e-09	epoxide hydrolase [Botrytis cinerea ]	F:molecular_function	0.277957	0.0410402	0.62268	0	0.404015	0.00286485
Bcin04g06830.2	0.366741	9.76e-09		no GO terms	0.259523	0.0591947	0.373874	0.00190009	0.128554	0.438798
Bcin04g05810.1	0.366228	1.03e-08	Poh1 peptidase [Botrytis cinerea T4]	F:translation initiation factor activity; P:formation of translation preinitiation complex; C:eukaryotic 43S preinitiation complex; C:eukaryotic 48S preinitiation complex; P:regulation of translational initiation; C:eukaryotic translation initiation factor 3 complex	0.16309	0.276285	0.374417	0.00187308	0.0151655	0.946005
Bcin02g08820.1	0.365911	1.07e-08	amino acid transporter [Botrytis cinerea T4]	C:membrane; C:integral component of membrane; F:amino acid transmembrane transporter activity; P:amino acid transmembrane transport	0.360621	0.00595024	0.241685	0.0478947	0.294683	0.042628
Bcin03g05500.1	0.365391	1.13e-08	DUF1264 domain	no GO terms	0.47405	0.000132726	0.363375	0.00259124	0.423155	0.00155608
Bcin06g01510.1	0.365346	1.13e-08	glycosyltransferase family 17 [Botrytis cinerea T4]	F:transferase activity, transferring glycosyl groups; P:cellular protein modification process; P:biosynthetic process; C:cellular_component	0.362303	0.00570091	0.48847	3.58546e-05	0.450841	0.000572842
Bcin07g01990.1	0.365274	1.13e-08	hypothetical protein BC1G_02838	F:oxidoreductase activity; P:oxidation-reduction process	0.406742	0.00151731	0.391875	0.00111446	0.306782	0.0337244
Bcin10g04330.1	0.364971	1.16e-08		P:proteolysis; F:serine-type carboxypeptidase activity	0.24353	0.0802646	0.302509	0.0124439	0.172477	0.277291
Bcin05g00620.1	0.364959	1.16e-08	hypothetical protein BofuT4_P148060.1	no GO terms	0.334685	0.0112264	0.478025	5.7838e-05	0.391291	0.00415907
Bcin16g00230.1	0.364892	1.17e-08	aldo keto reductase [Botrytis cinerea T4]	no GO terms	0.359712	0.00604786	0.473413	6.96563e-05	0.461679	0.00039997
Bcin10g05400.1	0.364133	1.27e-08	phosphatase PP2A regulatory subunit A [Botrytis cinerea T4]	F:binding	0.177781	0.228971	0.222219	0.0696517	0.0234536	0.90921
Bcin11g06440.1	0.363904	1.3e-08	glycoside hydrolase family 31 [Botrytis cinerea 1]	P:carbohydrate metabolic process; F:hydrolase activity, acting on glycosyl bonds	0.455562	0.000280214	0.444764	0.000199301	0.465844	0.000330721
Bcin15g02380.1	0.363708	1.32e-08	acid protease	F:aspartic-type endopeptidase activity; P:proteolysis	0.305155	0.0229224	0.526397	6.56029e-06	0.394018	0.00388223
Bcin01g11270.1	0.363707	1.32e-08	aryl-alcohol dehydrogenase [Botrytis cinerea T4]	no GO terms	0.377252	0.00363235	0.419723	0.000449365	0.305331	0.0348069
Bcin03g03830.1	0.363559	1.33e-08	pectin methylesterase [Botrytis cinerea]	P:carbohydrate metabolic process; P:catabolic process; C:cell wall; P:cell wall organization or biogenesis; C:extracellular region; F:molecular_function	0.232922	0.0968183	0.52127	8.49423e-06	0.309902	0.0314325
Bcin15g01330.1	0.363278	1.37e-08	similar to protein phosphatase	F:protein tyrosine phosphatase activity; P:peptidyl-tyrosine dephosphorylation	0.387059	0.0027635	0.322328	0.00764912	0.17283	0.276558
Bcin14g02020.1	0.363153	1.38e-08	small nucleolar ribonucleo SNU13 [Botrytis cinerea ]	C:box C/D snoRNP complex; C:small-subunit processome; F:RNA binding; P:maturation of LSU-rRNA; P:maturation of SSU-rRNA; C:precatalytic spliceosome; C:U4/U6 x U5 tri-snRNP complex; C:viral nucleocapsid; C:cytosolic large ribosomal subunit; P:mRNA splicing, via spliceosome; P:translation	0.0290152	0.889169	0.331701	0.00607479	0.25997	0.079277
Bcin04g01680.1	0.362914	1.42e-08	iron sulfur cluster assembly 1 [Botrytis cinerea T4]	P:sulfur compound metabolic process; C:mitochondrion; P:cofactor metabolic process; P:cellular component assembly; F:ion binding; P:biosynthetic process	0.40898	0.00139568	0.24494	0.0446775	0.197802	0.203546
Bcin08g01730.1	0.362343	1.51e-08	hypothetical protein BofuT4_P044010.1 [Botrytis cinerea T4]	no GO terms	0.0952387	0.569939	0.318991	0.00824055	0.138266	0.396812
Bcin03g02710.1	0.362292	1.51e-08	glycoside hydrolase family 27 [Botrytis cinerea T4]	P:carbohydrate metabolic process; F:hydrolase activity, acting on glycosyl bonds	0.473535	0.000133907	0.477686	5.7852e-05	0.497897	8.51315e-05
Bcin09g01150.1	0.362235	1.51e-08	carbohydrate-binding module family 1 [Botrytis cinerea 1]	P:carbohydrate metabolic process; C:extracellular region; F:hydrolase activity, acting on glycosyl bonds	0.303635	0.0237425	0.449078	0.000173858	0.32302	0.0236776
Bcin06g03060.1	0.3622	1.51e-08	glutathione S-transferase pi [Botrytis cinerea T4]	F:molecular_function	0.286788	0.0340093	0.50567	1.65458e-05	0.309658	0.0315999
Bcin03g04150.1	0.362115	1.52e-08	similar to hydrolase	C:cellular_component	0.0487249	0.798794	0.342431	0.00455703	0.16134	0.315588
Bcin05g01000.1	0.362022	1.53e-08	hypothetical protein BC1G_09422	F:oxidoreductase activity, acting on paired donors, with incorporation or reduction of molecular oxygen, reduced flavin or flavoprotein as one donor, and incorporation of one atom of oxygen; F:oxidoreductase activity, acting on paired donors, with incorporation or reduction of molecular oxygen; F:iron ion binding; P:oxidation-reduction process; F:monooxygenase activity; F:heme binding	0.478676	0.000116719	0.365681	0.00242752	0.552387	4.88142e-06
Bcin02g02320.1	0.361946	1.53e-08	oxidoreductase domain containing [Botrytis cinerea T4]	F:oxidoreductase activity	0.360282	0.00597488	0.468028	8.73514e-05	0.368258	0.00762489
Bcin03g04280.1	0.361686	1.57e-08	mboat family [Botrytis cinerea 1]	C:cellular_component	0.435431	0.000548516	0.211191	0.0854498	0.17089	0.282616
Bcin02g04310.1	0.361167	1.66e-08	c6 zinc finger domain-containing	C:nucleus; F:nucleic acid binding transcription factor activity; F:ion binding; P:cellular nitrogen compound metabolic process; P:biosynthetic process	0.419425	0.000970604	0.450217	0.000167841	0.327401	0.021615
Bcin02g04920.1	0.360265	1.83e-08	ubiquitin-conjugating enzyme E2-16 kDa [Botrytis cinerea ]	F:nucleotide binding; F:ATP binding	0.207379	0.1484	0.340179	0.00482364	0.0613809	0.740765
Bcin08g01650.1	0.360258	1.83e-08	hypothetical protein BC1G_07890	F:nucleic acid binding	0.410445	0.00134087	0.185119	0.134163	0.302876	0.0362789
Bcin10g00940.1	0.360077	1.87e-08	regulator of chromosome condensation [Botrytis cinerea 1]	no GO terms	0.284305	0.0358817	0.320985	0.00787452	0.20274	0.190991
Bcin13g01860.1	0.359826	1.91e-08	hypothetical protein BofuT4_P125460.1 [Botrytis cinerea T4]	C:cellular_component	0.354666	0.00681616	0.53379	4.77154e-06	0.234373	0.122169
Bcin07g02010.1	0.359719	1.93e-08	lsm14a [Botrytis cinerea 1]	no GO terms	0.213131	0.135058	0.305982	0.011494	0.159048	0.323178
Bcin01g03400.1	0.359675	1.93e-08	MFS multidrug transporter	P:transmembrane transport; C:cellular_component	0.435241	0.000548516	0.396473	0.00095464	0.263606	0.0748593
Bcin03g05060.1	0.359631	1.93e-08	carbohydrate esterase family 8 [Botrytis cinerea T4]	P:carbohydrate metabolic process; P:catabolic process; C:cell wall; P:cell wall organization or biogenesis; C:extracellular region; F:molecular_function	0.374702	0.00390907	0.467404	8.98037e-05	0.434292	0.00105426
Bcin05g01360.1	0.359584	1.93e-08	oxoglutarate dehydrogenase	F:thiamine pyrophosphate binding; F:oxidoreductase activity, acting on the aldehyde or oxo group of donors, disulfide as acceptor; F:oxoglutarate dehydrogenase (succinyl-transferring) activity; P:metabolic process; P:tricarboxylic acid cycle; P:oxidation-reduction process	0.391061	0.0025039	0.309292	0.0105008	0.111055	0.511097
Bcin02g09250.1	0.359393	1.96e-08	ammecr1 family [Botrytis cinerea 1]	no GO terms	0.344981	0.00862752	0.429422	0.000321629	0.331837	0.019604
Bcin02g03950.1	0.359215	2e-08	UBX domain-containing [Botrytis cinerea T4]	F:protein binding	0.378974	0.00342368	0.23615	0.0533452	0.135052	0.4118
Bcin12g06460.1	0.358643	2.12e-08	dienelactone hydrolase family [Botrytis cinerea T4]	F:hydrolase activity	0.46035	0.000230427	0.479897	5.29332e-05	0.429951	0.001244
Bcin13g00050.1	0.358432	2.17e-08	surface sp1 [Botrytis cinerea 1]	no GO terms	0.565315	1.62546e-06	0.321026	0.00786758	0.415627	0.00192637
Bcin02g07890.1	0.358346	2.18e-08	[Botrytis cinerea ]	no GO terms	0.422531	0.000862188	0.294845	0.0149325	0.406715	0.00261922
Bcin10g06130.1	0.357418	2.41e-08	exo-rhamnogalacturonase b [Botrytis cinerea 1]	P:carbohydrate metabolic process; P:cell wall organization or biogenesis; C:extracellular region; F:hydrolase activity, acting on glycosyl bonds	0.276424	0.0423909	0.401289	0.000813722	0.285594	0.0510441
Bcin06g06580.1	0.357136	2.48e-08	alpha-l-rhamnosidase [Botrytis cinerea 1]	F:molecular_function	0.383193	0.00302523	0.516875	1.01624e-05	0.488022	0.000131407
Bcin12g01490.1	0.356924	2.53e-08	hypothetical protein BofuT4_P133490.1 [Botrytis cinerea T4]	no GO terms	0.314921	0.0180781	0.259672	0.0328151	-0.0295985	0.884783
Bcin12g06190.1	0.356498	2.64e-08	hypothetical protein BofuT4_P068350.1	no GO terms	0.0956864	0.567668	0.248752	0.0412821	0.169737	0.28582
Bcin09g02670.1	0.356473	2.64e-08	ATP synthase subunit O [Botrytis cinerea T4]	F:ATPase activity; P:small molecule metabolic process; F:transmembrane transporter activity; P:cellular nitrogen compound metabolic process; P:biosynthetic process; C:cellular_component	0.319384	0.0163796	0.477944	5.7838e-05	0.174105	0.273053
Bcin12g04220.1	0.35632	2.67e-08	COPI-coated vesicle [Botrytis cinerea T4]	C:cellular_component	0.142119	0.356534	0.373426	0.00192594	0.0101601	0.965201
Bcin02g02910.1	0.356143	2.72e-08	fggy-family carbohydrate kinase	P:carbohydrate metabolic process; P:phosphorylation; F:phosphotransferase activity, alcohol group as acceptor; F:kinase activity	0.315912	0.017684	0.311856	0.0098768	0.167634	0.293852
Bcin06g03070.1	0.356015	2.75e-08	hypothetical protein BC1G_05765	P:proteolysis; F:serine-type peptidase activity; F:serine-type endopeptidase activity	0.267268	0.0508183	0.317065	0.00865335	0.12755	0.443022
Bcin09g00460.1	0.355779	2.81e-08	ABC transporter substrate binding	no GO terms	0.52713	1.24944e-05	0.458424	0.000123408	0.486625	0.000139587
Bcin14g02680.1	0.355721	2.82e-08	40S ribosomal S24 [Botrytis cinerea ]	F:nucleotide binding; F:structural constituent of ribosome; C:ribosome; P:translation	0.119872	0.451438	0.363361	0.00259124	0.205928	0.182995
Bcin10g03770.1	0.355643	2.83e-08	histidine acid phosphatase [Botrytis cinerea T4]	F:phosphatase activity	0.434129	0.000565566	0.38965	0.00119506	0.376655	0.00615172
Bcin08g01340.1	0.35529	2.92e-08	hypothetical protein BofuT4_P009740.1	F:RNA binding; F:ion binding	0.244276	0.0790468	0.160079	0.200702	0.0932311	0.590473
Bcin04g06210.1	0.355289	2.92e-08		C:nucleus; F:zinc ion binding; P:regulation of transcription, DNA-templated; F:RNA polymerase II transcription factor activity, sequence-specific DNA binding	0.162141	0.278713	0.426736	0.000349647	0.2578	0.0819472
Bcin15g04350.1	0.355129	2.96e-08	hypothetical protein BC1G_14544	F:iron ion binding; F:oxidoreductase activity, acting on paired donors, with incorporation or reduction of molecular oxygen; P:oxidation-reduction process; F:heme binding	0.448413	0.000362605	0.546107	2.54991e-06	0.623345	0
Bcin04g05420.1	0.354949	3.01e-08	hypothetical protein BcDW1_10277	no IPS match	0.365355	0.00522009	0.166915	0.180409	0.38535	0.00478842
Bcin01g01980.1	0.354647	3.11e-08	hypothetical protein SBOR_9948	no GO terms	0.203039	0.158139	0.429002	0.000324742	0.382827	0.00514035
Bcin09g05490.1	0.354073	3.3e-08	methyltransferase domain-containing [Botrytis cinerea T4]	F:methyltransferase activity	0.164107	0.273076	0.55841	1.26989e-06	0.222043	0.146927
Bcin03g08130.1	0.353135	3.67e-08	catechol dioxygenase [Botrytis cinerea T4]	F:oxidoreductase activity; F:ion binding	0.195103	0.180025	0.409997	0.000614196	0.165613	0.300838
Bcin10g05230.1	0.352816	3.79e-08		F:pyridoxal phosphate binding; F:4-aminobutyrate transaminase activity; F:catalytic activity; F:transaminase activity; P:gamma-aminobutyric acid metabolic process	0.294221	0.0291477	0.324471	0.00727198	0.153866	0.341315
Bcin02g01760.1	0.352438	3.92e-08		P:'de novo' IMP biosynthetic process; F:phosphoribosylformylglycinamidine synthase activity	0.172979	0.244362	0.285621	0.0184539	0.250882	0.0922888
Bcin16g03180.1	0.352213	4.01e-08	acyl- dehydrogenase domain [Botrytis cinerea T4]	F:oxidoreductase activity; F:ion binding	0.114365	0.476908	0.42013	0.000446766	0.320863	0.0246004
Bcin05g08230.1	0.352082	4.05e-08	glycoside hydrolase family 61	F:molecular_function	0.290165	0.0319189	0.455209	0.00013911	0.187859	0.232435
Bcin03g07250.1	0.351994	4.07e-08	cullin binding [Botrytis cinerea 1]	F:binding	0.382515	0.00306251	0.248114	0.0417799	0.2406	0.111585
Bcin08g03820.1	0.351572	4.26e-08	polysaccharide lyase family 1 [Botrytis cinerea T4]	P:carbohydrate metabolic process; P:catabolic process; F:lyase activity; C:extracellular region	0.286055	0.034592	0.531511	5.34838e-06	0.375217	0.00629536
Bcin14g00760.1	0.351309	4.37e-08	acid phosphatase [Botrytis cinerea T4]	F:molecular_function	0.332868	0.0116384	0.519642	9.05492e-06	0.376397	0.00616752
Bcin13g02640.1	0.351192	4.41e-08	rhamnogalacturonase b	P:carbohydrate metabolic process; F:hydrolase activity, acting on glycosyl bonds	0.321039	0.0156846	0.440789	0.000226058	0.275597	0.0609941
Bcin01g08780.1	0.351095	4.44e-08	phospho-2-dehydro-3-deoxyheptonate aldolase [Botrytis cinerea T4]	P:aromatic amino acid family biosynthetic process; F:catalytic activity; F:3-deoxy-7-phosphoheptulonate synthase activity; P:chorismate biosynthetic process; P:cellular amino acid biosynthetic process; P:biosynthetic process; F:transferase activity	0.285974	0.0346133	0.438334	0.000245224	0.385445	0.00478842
Bcin01g02690.1	0.350913	4.5e-08	extracelular serine carboxypeptidase	F:peptidase activity	0.311137	0.0200441	0.467987	8.73514e-05	0.355168	0.0109293
Bcin03g07180.1	0.350911	4.5e-08	[Botrytis cinerea ]	F:oxidoreductase activity	0.206633	0.150079	0.451044	0.000162775	0.441617	0.000814233
Bcin06g06800.1	0.350797	4.54e-08	er big1 [Botrytis cinerea 1]	C:cellular_component	0.0337358	0.870021	0.338253	0.00507418	0.15643	0.331429
Bcin09g01390.1	0.350137	4.86e-08	small nucleolar ribonucleo complex subunit [Botrytis cinerea 1]	P:ribosome biogenesis; P:cellular nitrogen compound metabolic process; C:nucleolus	0.0982773	0.55642	0.304802	0.0117879	0.43866	0.000899407
Bcin12g02160.1	0.350091	4.86e-08	hypothetical protein BC1G_03094	F:NEDD8 activating enzyme activity; P:protein neddylation; F:small protein activating enzyme activity	0.199566	0.166878	0.429314	0.000321699	0.245646	0.101908
Bcin12g00710.1	0.350087	4.86e-08	hypothetical protein BC1G_03506	F:oxidoreductase activity; P:oxidation-reduction process	0.319832	0.0162613	0.325	0.00720719	0.354436	0.0110938
Bcin02g06870.1	0.350037	4.87e-08	putative transmembrane protein	C:cellular_component	0.366888	0.00499383	0.262113	0.0311811	0.00448996	0.983684
Bcin12g00290.1	0.34957	5.12e-08	mitochondrion biogenesis (She9)	C:cellular_component	0.227415	0.106946	0.369615	0.00214488	0.183966	0.243682
Bcin12g03880.1	0.349329	5.24e-08	serine threonine phosphatase PP2A-2 catalytic subunit [Botrytis cinerea ]	F:phosphatase activity; P:cellular protein modification process	0.192838	0.185856	0.227509	0.0631356	0.0282013	0.889322
Bcin12g05790.1	0.349151	5.32e-08	pi31 proteasome regulator [Botrytis cinerea 1]	C:protein complex; C:intracellular	0.298983	0.026371	0.322613	0.00758478	0.239419	0.113536
Bcin05g06430.1	0.348845	5.49e-08	hypothetical protein BofuT4_P134770.1	P:metabolic process; P:'de novo' IMP biosynthetic process; P:biosynthetic process; F:amino acid binding; F:hydroxymethyl-, formyl- and related transferase activity; F:formyltetrahydrofolate deformylase activity	0.4043	0.00158829	0.461842	0.000108859	0.299783	0.0384535
Bcin05g03580.1	0.348731	5.54e-08	scytalidoglutamic peptidase [Botrytis cinerea 1]	F:peptidase activity	0.474213	0.000132726	0.538619	3.81404e-06	0.481158	0.00018019
Bcin06g07340.1	0.34862	5.59e-08	hypothetical protein BC1G_14226		0.431972	0.000598389	0.383044	0.00143787	0.286747	0.0497546
Bcin03g00620.1	0.348179	5.82e-08		F:protein binding	0.0237249	0.910563	0.383899	0.00140563	0.172748	0.276756
Bcin16g02870.1	0.348177	5.82e-08		no GO terms	0.300868	0.0252426	0.284848	0.0188045	0.275665	0.0609941
Bcin09g04000.1	0.348151	5.82e-08	transcription factor C2H2	F:ion binding	0.421161	0.000907816	0.434645	0.000276245	0.389867	0.0043054
Bcin12g04860.1	0.348053	5.86e-08		F:ATP binding; F:aspartate carbamoyltransferase activity; P:'de novo' pyrimidine nucleobase biosynthetic process; P:nitrogen compound metabolic process; F:metal ion binding; P:glutamine metabolic process; P:cellular amino acid metabolic process; F:carbamoyl-phosphate synthase (glutamine-hydrolyzing) activity; F:amino acid binding; F:carboxyl- or carbamoyltransferase activity	0.214853	0.131704	0.25799	0.0340115	0.217444	0.155887
Bcin04g04500.1	0.348013	5.87e-08	outer mitochondrial membrane porin [Botrytis cinerea ]	F:voltage-gated anion channel activity; P:regulation of anion transmembrane transport; P:transmembrane transport; C:mitochondrial outer membrane; P:anion transport	0.124173	0.433781	0.216888	0.0772994	-0.041834	0.831783
Bcin02g07770.1	0.347856	5.94e-08	Bcnep2, necrosis- and ethylene-inducing 2 precursor [Botrytis cinerea ]	no GO terms	0.25175	0.067891	0.388673	0.0012298	0.276628	0.0598191
Bcin11g04280.1	0.347832	5.94e-08	hypothetical protein BC1G_03359 [Botrytis cinerea B05.10]	no GO terms	0.356199	0.00656889	0.287887	0.0174916	0.221243	0.148421
Bcin12g00330.1	0.3465	6.88e-08	topoisomerase II-associated PAT1 [Botrytis cinerea T4]	F:isomerase activity	0.28904	0.0326232	0.264324	0.0297226	0.180534	0.252286
Bcin04g04930.1	0.346154	7.13e-08	endopolygalacturonase [Botrytis cinerea]	P:carbohydrate metabolic process; P:cell wall organization or biogenesis; C:extracellular region; F:hydrolase activity, acting on glycosyl bonds	0.257122	0.061795	0.493475	2.91781e-05	0.35156	0.0118605
Bcin04g01920.1	0.345814	7.38e-08	hypothetical protein BC1G_14191 [Botrytis cinerea B05.10]	no GO terms	0.0877509	0.607863	0.44452	0.000199699	0.285689	0.0509479
Bcin10g04300.1	0.345673	7.46e-08	40S ribosomal S18	F:RNA binding; F:structural constituent of ribosome; C:cytosol; P:ribosome biogenesis; C:ribosome; P:translation	0.0656538	0.718016	0.405494	0.000704772	0.240749	0.111541
Bcin03g01130.1	0.345638	7.47e-08		F:oxidoreductase activity	0.342078	0.00931744	0.422708	0.000404035	0.298969	0.0392432
Bcin10g00950.1	0.345501	7.55e-08	hypothetical protein BC1G_05145	F:catalytic activity	0.122029	0.442472	0.216183	0.078139	0.0568774	0.762954
Bcin09g05740.1	0.345441	7.58e-08	feruloyl esterase b	F:molecular_function	0.321948	0.015363	0.340844	0.00475457	0.279395	0.0571898
Bcin05g00220.1	0.345403	7.58e-08		no GO terms	0.365993	0.00511694	0.15019	0.230765	0.208587	0.176687
Bcin15g04970.1	0.345358	7.59e-08	glucose-6-phosphate isomerase	F:glucose-6-phosphate isomerase activity; P:gluconeogenesis; P:glycolytic process	0.433234	0.000582217	0.290627	0.0164684	0.138999	0.39452
Bcin02g01810.1	0.344939	7.92e-08	benzodiazepine receptor family [Botrytis cinerea T4]	C:cellular_component	0.465559	0.000185249	0.384672	0.00137579	0.400597	0.00321023
Bcin05g05580.1	0.344863	7.96e-08	ribose-phosphate pyrophosphokinase [Botrytis cinerea T4]	P:small molecule metabolic process; F:ion binding; P:cellular nitrogen compound metabolic process; P:biosynthetic process; F:kinase activity	0.143611	0.350508	0.283939	0.0192189	0.177835	0.260099
Bcin13g05560.1	0.344742	8.04e-08	actin cytoskeleton organization (Cro1) [Botrytis cinerea T4]	F:binding	0.43181	0.000599203	0.446215	0.000191215	0.322273	0.0239412
Bcin12g01940.1	0.343991	8.69e-08	hypothetical protein BofuT4_P133900.1	C:nucleus; C:cytoplasm; F:oxidoreductase activity; F:ion binding; P:cellular protein modification process; P:biosynthetic process	-0.0554666	0.766679	0.309143	0.0105387	0.325136	0.023011
Bcin05g06150.1	0.343983	8.69e-08	hypothetical protein BC1G_01764	F:protein binding	0.380372	0.00328735	0.221093	0.0711855	0.341725	0.0154036
Bcin06g01690.1	0.343804	8.83e-08	glycoside hydrolase family 36	F:molecular_function	0.333464	0.0114637	0.385486	0.00134265	0.301601	0.0371865
Bcin10g01020.1	0.343768	8.84e-08	small secreted [Botrytis cinerea 1]	no GO terms	0.38341	0.00301512	0.456579	0.000131681	0.297314	0.0407337
Bcin03g07320.1	0.343735	8.84e-08	ribonuclease T2 [Botrytis cinerea T4]	F:RNA binding; F:nuclease activity	0.222531	0.116498	0.451275	0.00016192	0.302781	0.036344
Bcin14g05330.1	0.34365	8.89e-08	gpi anchored [Botrytis cinerea 1]	F:oxidoreductase activity; F:ion binding	0.357664	0.0063934	0.38459	0.00137732	0.34452	0.0144266
Bcin08g01040.1	0.343236	9.27e-08	zinc finger dhhc domain containing [Botrytis cinerea 1]	no GO terms	0.476682	0.000122505	0.369249	0.0021733	0.152103	0.34805
Bcin01g03710.1	0.343212	9.27e-08	siderophore biosynthesis acetylase [Botrytis cinerea T4]	no GO terms	0.382162	0.00308879	0.342797	0.00451664	0.264189	0.0742755
Bcin04g03620.1	0.343171	9.28e-08	hypothetical protein BofuT4_P096150.1	F:RNA binding; F:nuclease activity	0.215057	0.13137	0.50643	1.60386e-05	0.337697	0.0172392
Bcin01g08220.1	0.342791	9.64e-08	oxidoreductase [Botrytis cinerea T4]	F:oxidoreductase activity; F:ion binding	0.493123	6.47796e-05	0.462819	0.000105544	0.39688	0.00364057
Bcin06g02930.1	0.342715	9.69e-08	hypothetical protein BofuT4_P110500.1	no GO terms	0.434767	0.000555916	0.397789	0.000916575	0.24962	0.094185
Bcin10g03930.1	0.342644	9.73e-08	serine threonine phosphatase	F:phosphoprotein phosphatase activity; F:metal ion binding; P:protein dephosphorylation	0.27245	0.0460792	0.211801	0.0845761	-0.147748	0.363707
Bcin06g02310.1	0.34203	1.04e-07	hypothetical protein BC1G_01261	no GO terms	0.386367	0.0028145	0.237805	0.0516744	0.089026	0.610021
Bcin02g06380.1	0.341855	1.05e-07	fatty acid desaturase [Botrytis cinerea T4]	F:oxidoreductase activity; P:lipid metabolic process; C:cellular_component	0.257176	0.0617584	0.322056	0.00769257	0.164216	0.305934
Bcin07g02610.1	0.3417	1.07e-07	6-phosphogluconate dehydrogenase	P:small molecule metabolic process; F:oxidoreductase activity; P:cofactor metabolic process; P:cellular nitrogen compound metabolic process	0.432881	0.000584524	0.411639	0.000586527	0.182786	0.246423
Bcin02g05100.1	0.341641	1.07e-07	copper amine oxidase [Botrytis cinerea T4]	F:oxidoreductase activity; F:ion binding	0.372328	0.00420024	0.392444	0.00109779	0.414921	0.00197122
Bcin11g04790.1	0.341516	1.08e-07	aldehyde reductase	F:oxidoreductase activity; P:oxidation-reduction process	0.350502	0.00763193	0.244018	0.0456457	0.282718	0.0538383
Bcin02g01720.1	0.341494	1.08e-07	phospholipase [Botrytis cinerea T4]	F:molecular_function	0.168869	0.257364	0.476438	6.14607e-05	0.336774	0.0176815
Bcin05g07120.1	0.341474	1.08e-07	short-chain dehydrogenase reductase SDR [Botrytis cinerea T4]	F:oxidoreductase activity	0.505819	3.62381e-05	0.364433	0.00251346	0.434183	0.00105426
Bcin03g06340.1	0.341313	1.1e-07	hypothetical protein BC1G_06115 [Botrytis cinerea B05.10]	no GO terms	0.176723	0.232272	0.408397	0.000644415	0.196948	0.206041
Bcin08g01110.1	0.341229	1.1e-07	woronin body major	F:translation factor activity, RNA binding	0.295442	0.0284163	0.197504	0.108562	-0.0477211	0.806234
Bcin01g00530.1	0.339903	1.27e-07	hypothetical protein BcDW1_1467	F:protein binding	0.375841	0.00379397	0.343896	0.00439787	0.15624	0.331808
Bcin14g02830.1	0.339775	1.29e-07	60S ribosomal L3 [Botrytis cinerea ]	F:structural constituent of ribosome; C:ribosome; P:translation	0.118611	0.458075	0.342512	0.00454855	0.167444	0.294356
Bcin03g00770.1	0.339685	1.29e-07	hypothetical protein BC1G_02113	no GO terms	0.0254205	0.902852	0.323372	0.00747615	0.254748	0.0861454
Bcin04g06830.1	0.339566	1.31e-07		no GO terms	0.248616	0.0719302	0.351438	0.00359624	0.0993218	0.562513
Bcin03g05120.1	0.338757	1.42e-07	hypothetical protein BC1G_00810 [Botrytis cinerea B05.10]	F:protein kinase binding; P:regulation of cell cycle; P:regulation of cyclin-dependent protein serine/threonine kinase activity	0.161245	0.282263	0.348738	0.0038619	0.28691	0.0496793
Bcin13g04470.1	0.338158	1.52e-07		F:nucleic acid binding	0.373426	0.00406918	0.229069	0.061352	0.153052	0.344185
Bcin13g00250.1	0.338068	1.53e-07	peroxisomal adenine nucleotide transporter 1 [Botrytis cinerea 1]	C:cellular_component; P:transport	0.366332	0.00507751	0.181701	0.142219	0.422396	0.00160172
Bcin05g08380.1	0.337999	1.53e-07	hypothetical protein BcDW1_8583	no GO terms	0.14163	0.358857	0.327265	0.00680709	-0.00850515	0.970659
Bcin04g01780.1	0.337895	1.54e-07	acetyl- hydrolase [Botrytis cinerea ]	P:sulfur compound metabolic process; P:cofactor metabolic process; F:molecular_function	0.351682	0.00741234	0.507895	1.48802e-05	0.333098	0.0191103
Bcin04g01630.1	0.337652	1.58e-07	regulatory subunit of the PKA [Botrytis cinerea]	F:ion binding; P:cellular protein modification process; F:enzyme regulator activity; F:kinase activity; C:intracellular	0.287683	0.0335025	0.16267	0.193188	0.161503	0.314964
Bcin03g01980.1	0.337	1.69e-07	fungal specific transcription factor	C:nucleus; F:DNA binding; F:ion binding; P:cellular nitrogen compound metabolic process; P:biosynthetic process	0.230263	0.101666	0.399159	0.00087413	0.343448	0.0148341
Bcin03g04500.1	0.336857	1.71e-07	ser arg-related nuclear matrix [Botrytis cinerea 1]	no GO terms	0.301777	0.0247583	0.144628	0.249482	0.108166	0.523643
Bcin14g03880.1	0.336797	1.72e-07	hypothetical protein BcDW1_2212	no GO terms	0.287344	0.0336817	0.184916	0.134621	-0.0110282	0.96266
Bcin10g01380.1	0.336708	1.73e-07	hypothetical protein BC1G_05092	F:nucleic acid binding; P:transport; C:intracellular	0.325176	0.0141378	0.282244	0.019927	0.203934	0.187627
Bcin07g01700.1	0.336541	1.75e-07	hypothetical protein BC1G_15665	F:nucleic acid binding; P:mRNA 3'-end processing	0.0968258	0.563453	0.078866	0.544718	-0.0206728	0.922585
Bcin10g04100.1	0.336493	1.76e-07	methyltransferase family [Botrytis cinerea T4]	F:methyltransferase activity	0.213836	0.133808	0.267919	0.0275282	0.287751	0.0491462
Bcin05g06510.1	0.33637	1.78e-07	cellobiose dehydrogenase [Botrytis cinerea T4]	F:oxidoreductase activity; F:ion binding	0.37519	0.00385551	0.407542	0.000664572	0.145795	0.371329
Bcin02g04170.1	0.336273	1.79e-07	ATP synthase subunit mitochondrial precursor [Botrytis cinerea ]	P:small molecule metabolic process; F:transmembrane transporter activity; C:mitochondrion; C:protein complex; P:cellular nitrogen compound metabolic process; P:biosynthetic process	0.118177	0.460281	0.415165	0.000528427	0.096975	0.574477
Bcin05g00090.1	0.335977	1.84e-07	DED1_BOTFB ame: Full=ATP-dependent RNA helicase ded1	F:translation initiation factor activity; F:ATP binding; C:cytoplasm; F:helicase activity; P:translational initiation	0.362832	0.00562456	0.163782	0.189987	0.261598	0.0773137
Bcin02g04320.1	0.335964	1.84e-07	hypothetical protein BcDW1_4718	no GO terms	0.478174	0.000118778	0.472762	7.08437e-05	0.314284	0.0286859
Bcin11g03740.1	0.334952	2.04e-07	translation initiation factor rli1	F:ATPase activity; F:ion binding; F:translation factor activity, RNA binding	0.169778	0.254479	0.225271	0.0656466	-0.0640667	0.727221
Bcin02g05870.1	0.334771	2.07e-07	zinc-binding alcohol dehydrogenase [Botrytis cinerea T4]	F:oxidoreductase activity; F:ion binding	0.32987	0.0124815	0.525827	6.65548e-06	0.407176	0.00257977
Bcin11g04900.1	0.334639	2.09e-07	amino acid	C:cellular_component	0.403174	0.00164836	0.28847	0.0173107	0.243719	0.105483
Bcin04g05950.1	0.334307	2.16e-07	[Botrytis cinerea ]	no GO terms	0.362412	0.00570091	0.278025	0.0220417	0.2594	0.0803061
Bcin01g09570.1	0.334305	2.16e-07	hypothetical protein BofuT4_P014580.1	F:nucleotide binding; F:RNA binding	0.309034	0.0210298	0.288429	0.017326	0.2699	0.0677947
Bcin01g03730.1	0.333975	2.23e-07	Bcnrps6	F:catalytic activity; P:metabolic process; F:phosphopantetheine binding	0.346758	0.00834129	0.295958	0.0145721	0.276112	0.0604202
Bcin16g01410.1	0.333904	2.24e-07	benzoate 4-monooxygenase cytochrome p450	F:oxidoreductase activity; F:ion binding	0.46701	0.000181624	0.31701	0.00865886	0.366685	0.00787134
Bcin12g05210.1	0.333871	2.24e-07	malate dehydrogenase [Botrytis cinerea T4]	P:carbohydrate metabolic process; F:L-malate dehydrogenase activity; P:malate metabolic process; P:tricarboxylic acid cycle	0.28147	0.0381528	0.382189	0.00147701	0.288646	0.0481498
Bcin06g02240.1	0.333083	2.42e-07	similar to SUR7 protein	C:plasma membrane	0.251601	0.0680293	0.282122	0.0199797	0.224471	0.141845
Bcin10g02270.1	0.333081	2.42e-07	glutathione S-transferase [Botrytis cinerea T4]	F:molecular_function	0.266427	0.0514209	0.224878	0.0660983	0.237046	0.117288
Bcin08g01020.1	0.332587	2.55e-07	similar to sedolisin	F:peptidase activity	0.172558	0.24523	0.429883	0.000318446	0.261842	0.077017
Bcin15g00130.1	0.332041	2.69e-07	carbohydrate esterase family 5 [Botrytis cinerea T4]	P:carbohydrate metabolic process; C:extracellular region; F:hydrolase activity, acting on glycosyl bonds	0.418625	0.000988045	0.379286	0.00162426	0.251262	0.0916393
Bcin14g03100.1	0.331939	2.71e-07	ATP-dependent RNA helicase dbp5 [Botrytis cinerea T4]	F:ion binding; F:helicase activity	0.190165	0.192337	0.462724	0.000105544	0.324498	0.0232274
Bcin04g03510.1	0.331829	2.74e-07	extracellular cellulase allergen asp f7- [Botrytis cinerea 1]	no GO terms	0.341508	0.00943913	0.101601	0.427571	0.0901791	0.604361
Bcin08g05870.1	0.331783	2.74e-07	hypothetical protein BC1G_08975	F:catalytic activity; F:alpha-L-fucosidase activity	0.288755	0.0327606	0.432067	0.000300116	0.372409	0.00680567
Bcin10g00750.1	0.331582	2.79e-07	hypothetical protein BofuT4P201000002001	F:RNA binding; F:ion binding; P:mRNA processing	0.354897	0.00678946	0.266454	0.0284337	0.193787	0.214921
Bcin02g08370.1	0.331531	2.8e-07	tsa family	F:oxidoreductase activity; P:oxidation-reduction process	0.314162	0.0184641	0.205887	0.0938621	0.112927	0.503407
Bcin05g02870.1	0.331335	2.85e-07	26S proteasome non-ATPase regulatory subunit 11 [Botrytis cinerea T4]	C:protein complex; C:intracellular	0.119859	0.451438	0.22424	0.0669961	0.117037	0.485243
Bcin01g02970.1	0.330876	2.98e-07	carbohydrate-binding module family 18 [Botrytis cinerea 1]	F:molecular_function	0.366753	0.00501133	0.488266	3.58953e-05	0.254612	0.0862208
Bcin01g08720.1	0.330408	3.11e-07	ubiquitin-conjugating enzyme [Botrytis cinerea ]	no GO terms	0.0998372	0.547495	0.54745	2.3735e-06	0.161747	0.313905
Bcin11g06130.1	0.330405	3.11e-07	meiotically up-regulated 80 [Botrytis cinerea 1]	P:cellular protein modification process; P:cell cycle; F:enzyme binding	0.317553	0.0170747	0.246649	0.0430687	0.17595	0.266588
Bcin13g05670.1	0.330351	3.12e-07	aliphatic nitrilase [Botrytis cinerea T4]	F:hydrolase activity, acting on carbon-nitrogen (but not peptide) bonds; P:nitrogen compound metabolic process	0.327292	0.0134028	0.342987	0.00449381	0.361639	0.00907865
Bcin02g00890.1	0.330337	3.12e-07	hypothetical protein BcDW1_6460	C:cellular_component	0.269031	0.0490275	0.399213	0.000873259	0.350203	0.0122455
Bcin11g02070.1	0.330121	3.18e-07	hypothetical protein BofuT4P29000015001	no GO terms	0.25997	0.0586747	0.177523	0.152262	0.0519669	0.786575
Bcin11g05070.1	0.329849	3.26e-07	hypothetical protein BC1G_03255 [Botrytis cinerea B05.10]	C:integral component of membrane	0.43729	0.00051576	0.213836	0.0814193	0.284021	0.0523002
Bcin09g01730.1	0.329726	3.29e-07	ubiquitin-conjugating enzyme E2 [Botrytis cinerea T4]	F:ion binding	0.0265193	0.898518	0.358424	0.00294019	0.111042	0.511097
Bcin14g01980.1	0.32963	3.32e-07	transketolase [Botrytis cinerea T4]	F:transketolase activity; F:metal ion binding; P:metabolic process	0.409984	0.00136498	0.285255	0.0186237	0.130562	0.432002
Bcin08g04610.1	0.329276	3.44e-07	short-chain dehydrogenase reductase SDR [Botrytis cinerea T4]	F:oxidoreductase activity	0.369045	0.00466597	0.469696	8.05553e-05	0.249783	0.0940902
Bcin10g05100.1	0.32848	3.73e-07	hypothetical protein BC1G_03598	no GO terms	0.255033	0.063945	0.255751	0.0356429	0.115152	0.493263
Bcin02g02980.1	0.328396	3.75e-07	antibiotic biosynthesis monooxygenase [Botrytis cinerea 1]	P:oxidation-reduction process; F:monooxygenase activity	0.238348	0.0882488	0.304829	0.0117879	0.180806	0.251684
Bcin16g01090.1	0.328181	3.82e-07	---NA---	no GO terms	0.347762	0.00814172	0.276221	0.0229147	0.255507	0.0848096
Bcin03g06810.2	0.328113	3.84e-07	eukaryotic translation initiation factor subunit	F:translation factor activity, RNA binding	0.242444	0.0816343	0.268163	0.0273766	0.276519	0.0599001
Bcin03g04790.1	0.32788	3.92e-07	aldo keto reductase	F:oxidoreductase activity; P:oxidation-reduction process	0.00897992	0.970335	0.387032	0.00128503	0.164731	0.303536
Bcin03g02300.1	0.327464	4.09e-07	gtpase activating	P:signal transduction; F:enzyme regulator activity	0.415871	0.00108771	0.324702	0.00723327	0.105046	0.537917
Bcin09g01080.1	0.327088	4.24e-07	hypothetical protein BC1G_14709 [Botrytis cinerea B05.10]		0.363266	0.00553732	0.213782	0.0814491	-0.0659387	0.717667
Bcin01g08500.1	0.327042	4.25e-07	integral membrane [Botrytis cinerea T4]	C:cellular_component	0.123766	0.435012	0.257623	0.0342605	0.0990369	0.563213
Bcin05g06020.1	0.326855	4.32e-07	hypothetical protein BC1G_01778	P:carbohydrate metabolic process; F:hydrolase activity, hydrolyzing O-glycosyl compounds; C:extracellular region; F:cellulose binding	0.292973	0.0300759	0.531308	5.34973e-06	0.132081	0.424772
Bcin13g02870.1	0.326738	4.36e-07	ankyrin repeat	no GO terms	0.0627238	0.731225	0.226248	0.0645705	0.264772	0.07376
Bcin10g00930.1	0.32669	4.37e-07	dna damage tolerance rad31	P:cellular protein modification process; F:ligase activity	0.221161	0.118868	0.304775	0.0117879	0.251465	0.091415
Bcin14g05450.1	0.326662	4.37e-07	predicted protein	no GO terms	0.343557	0.00897625	0.409292	0.000628407	0.476926	0.000220722
Bcin06g01630.1	0.326385	4.49e-07	glycoside hydrolase family 79	F:molecular_function	0.467417	0.000179473	0.361177	0.00274639	0.475285	0.000229997
Bcin11g01050.1	0.326366	4.49e-07	homogentisate 1,2-dioxygenase [Botrytis cinerea T4]	P:L-phenylalanine catabolic process; P:tyrosine metabolic process; P:oxidation-reduction process; F:homogentisate 1,2-dioxygenase activity	0.281687	0.037951	0.447192	0.000185217	0.366047	0.00800203
Bcin03g00280.1	0.326202	4.55e-07	hypothetical protein BC1G_12517	no GO terms	0.32363	0.0147204	0.483709	4.4685e-05	0.330846	0.0199162
Bcin02g05470.1	0.326186	4.55e-07	nucleoside-diphosphate-sugar epimerase	no GO terms	0.381593	0.00315001	0.400922	0.000822487	0.358356	0.0100831
Bcin04g01180.1	0.326161	4.55e-07	60S ribosomal L18 [Botrytis cinerea ]	F:structural constituent of ribosome; C:ribosome; C:intracellular; P:translation	0.142173	0.356431	0.352537	0.00349796	0.17717	0.262195
Bcin04g00180.1	0.325948	4.64e-07	galactose-proton symport [Botrytis cinerea 1]	no GO terms	0.137751	0.375244	0.37637	0.00177407	0.272708	0.0645376
Bcin09g00150.1	0.325856	4.66e-07	mfs monosaccharide [Botrytis cinerea 1]	F:transmembrane transporter activity; C:cellular_component	0.530128	1.09976e-05	0.424064	0.000385286	0.440098	0.00085315
Bcin05g07430.1	0.325838	4.66e-07	acetyl-coa acetyltransferase [Botrytis cinerea T4]	F:transferase activity, transferring acyl groups other than amino-acyl groups; F:catalytic activity; P:metabolic process; F:transferase activity	0.553296	2.93921e-06	0.653337	0	0.512792	4.04251e-05
Bcin12g04840.1	0.325546	4.79e-07	predicted protein	no GO terms	0.180114	0.221599	0.390491	0.00117145	0.332854	0.0192426
Bcin14g00940.1	0.32528	4.92e-07		F:ATPase activity; F:ATP binding; C:integral component of membrane; P:transport; F:transporter activity	0.511354	2.8098e-05	0.459957	0.000117018	0.53809	1.03175e-05
Bcin11g04280.2	0.325141	4.97e-07	hypothetical protein BC1G_03359 [Botrytis cinerea B05.10]	no GO terms	0.208722	0.145183	0.326709	0.0068951	0.298169	0.0398209
Bcin10g04410.1	0.325081	4.99e-07	ureidoglycolate hydrolase	F:hydrolase activity, acting on carbon-nitrogen (but not peptide) bonds; P:catabolic process; F:lyase activity; P:cellular nitrogen compound metabolic process	0.346012	0.00845735	0.382678	0.00145391	0.151085	0.351826
Bcin06g06150.1	0.324706	5.18e-07	[Botrytis cinerea ]	no GO terms	0.337046	0.0106764	0.489989	3.36464e-05	0.332298	0.0194142
Bcin15g03580.2	0.324617	5.21e-07	stress-activated mitogen-activated kinase [Botrytis cinerea]	C:nucleus; C:cytoplasm; F:ion binding; P:cellular protein modification process; P:cellular nitrogen compound metabolic process; P:biosynthetic process; F:signal transducer activity; F:kinase activity	0.208885	0.144775	0.148494	0.2367	0.0228703	0.912228
Bcin06g06110.1	0.324151	5.46e-07	bzip transcription [Botrytis cinerea 1]	no GO terms	0.17112	0.250453	0.094452	0.463526	0.193218	0.216311
Bcin13g03870.1	0.323982	5.53e-07	P-type ATPase [Botrytis cinerea T4]	F:ion binding; C:cellular_component; P:transport	0.256986	0.0619647	0.430982	0.000310011	0.376234	0.00616752
Bcin10g03200.1	0.323969	5.53e-07	hypothetical protein BofuT4_P050930.1	no GO terms	0.128744	0.416368	0.318367	0.00836932	0.349091	0.0126295
Bcin05g06710.1	0.323898	5.56e-07	mitochondrial import inner membrane translocase subunit tim9 [Botrytis cinerea T4]	F:metal ion binding; C:mitochondrion; P:protein transport	0.0355534	0.861305	0.290301	0.0165786	-0.0221243	0.916276
Bcin15g03010.1	0.323633	5.7e-07	dnase1 [Botrytis cinerea 1]	no GO terms	0.502672	4.32449e-05	0.281118	0.0204156	0.19216	0.21969
Bcin08g04080.1	0.323403	5.82e-07	hypothetical protein BofuT4_P084560.1	C:plasma membrane	0.0611503	0.738398	0.383207	0.00143787	0.260798	0.0784937
Bcin04g01750.1	0.323112	5.97e-07	snare domain	P:membrane organization; P:vesicle-mediated transport; C:intracellular; F:molecular_function	0.121758	0.443884	0.271148	0.0256564	0.208112	0.177773
Bcin06g03510.1	0.323111	5.97e-07	transcription factor sequence	F:DNA binding; F:nucleic acid binding transcription factor activity; P:cellular nitrogen compound metabolic process; P:biosynthetic process	0.352509	0.00727708	0.384794	0.00137517	0.308966	0.0319671
Bcin15g04680.1	0.322918	6.07e-07	hypothetical protein BcDW1_147	no GO terms	0.263009	0.0550962	0.175244	0.157615	0.121853	0.466452
Bcin13g04000.1	0.322867	6.09e-07	d-arabinitol 2-dehydrogenase	F:oxidoreductase activity; P:oxidation-reduction process	0.293001	0.0300745	0.141386	0.260866	0.0947911	0.583861
Bcin10g01610.1	0.322603	6.22e-07	glycosyl family 43	P:carbohydrate metabolic process; F:hydrolase activity, acting on glycosyl bonds	0.325461	0.0140762	0.113863	0.370673	0.193747	0.214921
Bcin09g03490.1	0.322588	6.22e-07		no GO terms	0.250638	0.0690363	0.370293	0.00210007	0.0301275	0.882236
Bcin14g01200.1	0.322584	6.22e-07	22kda glyco [Botrytis cinerea 1]	no GO terms	0.370659	0.00443722	0.490247	3.3507e-05	0.317254	0.0270025
Bcin11g01700.1	0.322479	6.27e-07	similar to phosphoketolase	F:aldehyde-lyase activity; P:carbohydrate metabolic process	0.442051	0.00044443	0.233953	0.0556284	0.335431	0.0182632
Bcin09g05120.1	0.322446	6.27e-07	cytochrome b5 [Botrytis cinerea 1]	F:ion binding; C:cellular_component	0.160079	0.28692	0.490165	3.3507e-05	0.353798	0.0112812
Bcin04g03340.1	0.322392	6.29e-07	hypothetical protein BC1G_15300 [Botrytis cinerea B05.10]	no GO terms	0.310431	0.0204322	0.430399	0.000315435	0.2363	0.118624
Bcin12g02830.1	0.322123	6.43e-07	glycoside hydrolase family 3 [Botrytis cinerea T4]	P:carbohydrate metabolic process; F:hydrolase activity, hydrolyzing O-glycosyl compounds	0.255182	0.0638055	0.387982	0.00125156	0.268218	0.0700731
Bcin04g01950.1	0.32212	6.43e-07		F:nucleic acid binding; F:ATP binding; F:RNA binding; F:RNA helicase activity; P:RNA catabolic process	0.283831	0.0362191	0.27854	0.0217518	0.412873	0.00213569
Bcin11g00330.1	0.322106	6.43e-07	hydroxymethylglutaryl- synthase	P:isoprenoid biosynthetic process; F:hydroxymethylglutaryl-CoA synthase activity	0.545768	4.59705e-06	0.608478	0	0.550448	5.28009e-06
Bcin15g05190.1	0.322008	6.48e-07	integral membrane [Botrytis cinerea T4]	C:plasma membrane	0.345347	0.00854158	0.267282	0.0279669	0.223969	0.142664
Bcin11g04080.1	0.321845	6.57e-07	chromatin regulatory sir2	F:ion binding	0.25567	0.0633961	0.262113	0.0311811	0.246595	0.100306
Bcin11g03020.1	0.321464	6.82e-07	galactokinase [Botrytis cinerea 1]	P:small molecule metabolic process; P:carbohydrate metabolic process; C:cytoplasm; F:ion binding; F:kinase activity	0.164962	0.27056	0.383383	0.00143216	0.192078	0.220005
Bcin12g00940.1	0.321356	6.88e-07	3-ketoacyl-coA thiolase [Botrytis cinerea T4]	P:biological_process; F:transferase activity, transferring acyl groups	0.2449	0.0781355	0.481918	4.81767e-05	0.279585	0.0569716
Bcin14g04790.1	0.321321	6.89e-07	60s ribosomal l15 [Botrytis cinerea 1]	F:structural constituent of ribosome; C:ribosome; P:translation	0.164379	0.27226	0.363239	0.00259921	0.160241	0.319026
Bcin11g02800.1	0.321251	6.92e-07	hypothetical protein BofuT4_P037930.1 [Botrytis cinerea T4]	no GO terms	0.239257	0.0867879	0.156823	0.210472	-0.0768041	0.6689
Bcin14g00860.1	0.321154	6.97e-07	carbohydrate esterase family 8 [Botrytis cinerea T4]	P:carbohydrate metabolic process; P:catabolic process; C:cell wall; P:cell wall organization or biogenesis; C:extracellular region; F:molecular_function	0.428974	0.00067079	0.471392	7.5035e-05	0.426506	0.00136483
Bcin15g03310.1	0.321058	7.02e-07	hypothetical protein BC1G_02964	F:protein disulfide oxidoreductase activity; F:electron carrier activity; P:cell redox homeostasis	0.119872	0.451438	0.204924	0.0954123	0.00712154	0.975405
Bcin09g07020.1	0.321003	7.04e-07	transcription factor Cys6 [Botrytis cinerea T4]	C:nucleus; F:zinc ion binding; P:regulation of transcription, DNA-templated; F:RNA polymerase II transcription factor activity, sequence-specific DNA binding	0.266332	0.0515013	0.294832	0.0149325	0.148386	0.360938
Bcin06g00730.1	0.320933	7.08e-07	rRNA processing Bystin [Botrytis cinerea T4]	no GO terms	0.190247	0.192178	0.311991	0.00985644	0.327401	0.021615
Bcin16g04640.2	0.320694	7.23e-07			0.294764	0.0288306	0.347368	0.00399789	0.119154	0.476733
Bcin15g02950.1	0.320268	7.54e-07		C:nucleus; F:DNA binding; F:nucleic acid binding transcription factor activity; F:ion binding; P:cellular nitrogen compound metabolic process; P:biosynthetic process	0.359699	0.00604786	0.259726	0.0327744	0.163334	0.308471
Bcin08g03250.1	0.319993	7.74e-07	gtpase activating rga6	P:signal transduction	-0.0547613	0.768922	0.189094	0.125279	0.142065	0.383812
Bcin04g01890.1	0.319784	7.88e-07	diphosphomevalonate decarboxylase [Botrytis cinerea T4]	P:sulfur compound metabolic process; P:cofactor metabolic process; P:lipid metabolic process; F:lyase activity; F:ion binding; C:cytosol; P:biosynthetic process	0.474308	0.000132726	0.604042	0	0.40491	0.00279498
Bcin15g03580.3	0.319705	7.93e-07	stress-activated mitogen-activated kinase [Botrytis cinerea]	F:ATP binding; F:MAP kinase activity; F:protein kinase activity; P:protein phosphorylation	0.197029	0.174445	0.268435	0.0272325	0.0248644	0.903837
Bcin01g06140.1	0.319675	7.93e-07	rna recognition domain-containing [Botrytis cinerea 1]	F:RNA binding; P:mRNA processing	0.0408573	0.836012	0.361666	0.00271237	0.2742	0.0624494
Bcin01g10360.1	0.319608	7.97e-07	pre-mrna splicing factor	P:DNA metabolic process; F:molecular_function; P:response to stress	0.182461	0.215088	0.430589	0.000314659	0.28923	0.0475908
Bcin13g05220.1	0.319341	8.17e-07	ccch finger dna binding [Botrytis cinerea 1]	F:ion binding	0.239853	0.0857527	0.321148	0.00784928	0.287466	0.0492968
Bcin16g04640.1	0.319242	8.23e-07	NAD-dependent formate dehydrogenase [Botrytis cinerea T4]	F:oxidoreductase activity	0.281701	0.037951	0.362358	0.00266908	0.120808	0.47067
Bcin01g00380.1	0.319135	8.3e-07		no GO terms	0.268258	0.0496604	0.402442	0.000783732	0.260011	0.079277
Bcin09g01700.1	0.318985	8.39e-07	thioesterase family [Botrytis cinerea 1]	C:cellular_component	0.383912	0.00298789	0.410865	0.000597802	0.410621	0.002297
Bcin14g02270.1	0.318442	8.84e-07		F:ion binding	0.0633071	0.728077	0.411259	0.000592956	0.259916	0.0793072
Bcin12g00420.1	0.318414	8.85e-07	60S ribosomal export NMD3 [Botrytis cinerea ]	no GO terms	0.144221	0.348259	0.245836	0.043863	0.239636	0.113116
Bcin04g00520.1	0.318287	8.94e-07	helicase associated domain-containing	F:ion binding; F:helicase activity	0.23379	0.0954271	0.274281	0.0239808	0.07207	0.690206
Bcin08g03710.1	0.317865	9.31e-07		F:oxidoreductase activity; P:oxidation-reduction process	0.269384	0.0486699	0.473603	6.92602e-05	0.319737	0.0252918
Bcin05g07670.1	0.317663	9.48e-07	alcohol dehydrogenase	F:zinc ion binding; F:oxidoreductase activity; P:oxidation-reduction process	0.452075	0.000319086	0.518747	9.39011e-06	0.378432	0.00587934
Bcin09g06400.1	0.31764	9.48e-07		F:oxidoreductase activity; P:oxidation-reduction process	0.290274	0.0318731	0.435743	0.000265418	0.0932718	0.59034
Bcin03g06360.1	0.317558	9.54e-07	c6 finger domain-containing	C:nucleus; F:zinc ion binding; P:regulation of transcription, DNA-templated; F:RNA polymerase II transcription factor activity, sequence-specific DNA binding	0.383098	0.00302523	0.454368	0.000142873	0.314542	0.0284761
Bcin02g05580.1	0.317404	9.67e-07	predicted protein	no GO terms	0.281281	0.0382953	0.482691	4.65933e-05	0.22264	0.145503
Bcin14g05240.1	0.317324	9.71e-07	hypothetical protein BC1G_10754	F:protein binding	0.218638	0.123851	0.103296	0.419644	-0.0856213	0.626332
Bcin13g05580.1	0.317317	9.71e-07	alcohol dehydrogenase [Botrytis cinerea 1]	F:oxidoreductase activity; F:ion binding	0.375556	0.00382674	0.431782	0.000301429	0.241332	0.110625
Bcin14g04600.1	0.317284	9.72e-07	hypothetical protein BC1G_15345	no GO terms	0.194479	0.181719	0.249959	0.0402077	0.244601	0.103806
Bcin13g00620.1	0.317243	9.73e-07		F:nucleic acid binding; F:RNA binding; F:binding	0.451886	0.000319086	0.264596	0.0295466	0.0437602	0.823145
Bcin05g07360.1	0.317216	9.74e-07	hypothetical protein BofuT4_P059920.1 [Botrytis cinerea T4]	C:cellular_component	0.334943	0.0111693	0.326736	0.0068951	0.236815	0.117602
Bcin12g03960.1	0.317158	9.77e-07	survival factor 1 [Botrytis cinerea T4]	P:response to stress	0.0888633	0.602609	0.350054	0.00373888	0.331267	0.0197722
Bcin11g02040.1	0.316705	1.02e-06	succinate-semialdehyde dehydrogenase [Botrytis cinerea 1]	F:oxidoreductase activity	0.45255	0.000316987	0.612547	0	0.532122	1.4404e-05
Bcin01g05310.1	0.316406	1.05e-06	[Botrytis cinerea ]	no GO terms	0.252523	0.0670083	0.357542	0.00302725	0.0904775	0.60289
Bcin08g00270.1	0.316353	1.05e-06	sugar transporter [Botrytis cinerea T4]	F:substrate-specific transmembrane transporter activity; P:transmembrane transport; F:transmembrane transporter activity; C:membrane; C:integral component of membrane; F:transporter activity	0.251967	0.0676864	0.221785	0.0702225	0.0294086	0.885395
Bcin11g02050.1	0.315852	1.1e-06	short-chain dehydrogenase reductase [Botrytis cinerea T4]	F:oxidoreductase activity; P:oxidation-reduction process	0.564175	1.69239e-06	0.5586	1.26989e-06	0.546175	6.28594e-06
Bcin05g05900.1	0.315767	1.11e-06	pepsin (secreted ) [Botrytis cinerea T4]	F:peptidase activity	0.3328	0.0116526	0.419235	0.000455583	0.311205	0.030586
Bcin08g00630.1	0.315683	1.12e-06	glutamate-rich WD repeat containing 1 [Botrytis cinerea T4]	C:nucleus	0.048752	0.798666	0.388918	0.00121972	0.260486	0.0788885
Bcin05g02420.1	0.315604	1.13e-06	CFEM domain-containing	C:cellular_component	0.0145279	0.947083	0.358044	0.00297488	0.377794	0.00595304
Bcin02g03820.1	0.315313	1.16e-06	hypothetical protein BC1G_07978	F:ATP binding; F:thymidylate kinase activity; P:dTDP biosynthetic process	0.110404	0.495848	0.27698	0.0225132	0.200638	0.195886
Bcin09g00770.1	0.3151	1.18e-06	similar to D-lactonohydrolase-like protein	F:molecular_function	0.448793	0.000360268	0.565979	8.85061e-07	0.441766	0.000814233
Bcin07g01260.1	0.315063	1.18e-06	hypothetical protein BC1G_09773	F:endoplasmic reticulum signal peptide binding; P:SRP-dependent cotranslational protein targeting to membrane; F:RNA binding; F:7S RNA binding; F:signal recognition particle binding; C:signal recognition particle, endoplasmic reticulum targeting	0.254246	0.065027	0.211055	0.0856898	0.135526	0.409842
Bcin02g02470.1	0.31465	1.23e-06	mrna cleavage factor complex component pcf11 [Botrytis cinerea 1]	C:mRNA cleavage factor complex; P:termination of RNA polymerase II transcription; P:intracellular protein transport; P:mRNA polyadenylation; P:mRNA cleavage	0.114528	0.476328	0.22774	0.0629102	-0.0612724	0.740961
Bcin05g02720.1	0.314627	1.23e-06	glycerol:H+ symporter (Gup1)	C:cellular_component	0.164989	0.27056	0.360716	0.00277786	0.257651	0.0821084
Bcin07g00490.1	0.314578	1.23e-06	AP-3 complex subunit delta	P:vesicle-mediated transport; F:protein transporter activity; C:Golgi apparatus; C:protein complex	0.167702	0.260701	0.384943	0.00137129	0.0841698	0.633029
Bcin04g00170.1	0.314514	1.24e-06	short-chain dehydrogenase reductase SDR [Botrytis cinerea T4]	F:oxidoreductase activity	0.370619	0.00443722	0.161923	0.195265	0.201424	0.194222
Bcin05g07640.1	0.314248	1.27e-06		F:iron ion binding; F:oxidoreductase activity, acting on paired donors, with incorporation or reduction of molecular oxygen; P:oxidation-reduction process; F:heme binding	0.124145	0.433886	0.528228	5.87363e-06	0.298223	0.0398016
Bcin06g02080.1	0.313881	1.31e-06	f-box domain	F:protein binding	0.32717	0.0134233	0.41404	0.00054956	0.201845	0.193564
Bcin05g02400.1	0.313783	1.32e-06	mitochondrial hypoxia responsive domain-containing [Botrytis cinerea 1]	C:cellular_component	0.32146	0.0155643	0.349213	0.00381502	0.261449	0.0774608
Bcin09g01610.1	0.313738	1.32e-06	MFS sugar transporter [Botrytis cinerea T4]	F:transmembrane transporter activity; C:cellular_component	0.462778	0.00020766	0.450692	0.000164698	0.39882	0.00340181
Bcin03g04270.1	0.313431	1.36e-06	putative serine-rich protein	C:cellular_component	0.250963	0.0687756	0.389026	0.0012156	0.29376	0.0436904
Bcin01g06490.1	0.313419	1.36e-06	hypothetical protein BC1G_00345 [Botrytis cinerea B05.10]	P:cellular nitrogen compound metabolic process; P:biosynthetic process	0.189189	0.19546	0.292187	0.0159022	0.218123	0.154528
Bcin07g03500.1	0.313352	1.37e-06	KH domain-containing [Botrytis cinerea T4]	F:RNA binding	0.419791	0.000961669	0.256348	0.0352735	-0.017146	0.938911
Bcin01g04670.1	0.31319	1.39e-06	hypothetical protein BC1G_13327	no GO terms	0.305589	0.0227615	0.202604	0.0993091	0.113633	0.49996
Bcin15g02690.1	0.313102	1.39e-06	phenol acid carboxylase	F:carboxy-lyase activity	0.465993	0.000183528	0.3871	0.00128444	0.427767	0.00131534
Bcin12g03290.1	0.312972	1.41e-06	hypothetical protein BofuT4_P000090.1	F:ion binding	0.163795	0.274116	0.292621	0.0157479	0.164324	0.305457
Bcin09g06530.1	0.312712	1.44e-06	[Botrytis cinerea ]	C:cellular_component	0.329585	0.0125785	0.352794	0.00347121	0.42812	0.00130372
Bcin16g02910.1	0.312442	1.48e-06	mediator of rna polymerase ii transcription subunit 6	F:transcription factor activity, protein binding; C:protein complex; P:cellular nitrogen compound metabolic process; P:biosynthetic process; C:nucleoplasm	0.24863	0.0719302	0.287181	0.0178007	0.173603	0.27473
Bcin15g03580.1	0.312359	1.49e-06	stress-activated mitogen-activated kinase [Botrytis cinerea]	C:nucleus; C:cytoplasm; F:ion binding; P:cellular protein modification process; P:cellular nitrogen compound metabolic process; P:biosynthetic process; F:signal transducer activity; F:kinase activity	0.182203	0.215874	0.180507	0.14497	0.0735621	0.682073
Bcin04g05050.1	0.311119	1.68e-06	camp-mediated signaling sok1 [Botrytis cinerea 1]	no GO terms	0.321215	0.0156646	0.131077	0.299804	0.0342512	0.863204
Bcin12g00340.1	0.31099	1.7e-06	MNNG and nitrosoguanidine resistance	C:cellular_component	0.346514	0.00835087	0.132162	0.295263	0.366386	0.00791701
Bcin06g07510.1	0.310867	1.72e-06	phosphoglycerate mutase	no GO terms	0.259211	0.0596955	0.29433	0.0150993	0.340342	0.0160429
Bcin09g00230.1	0.310619	1.75e-06	RING finger domain [Botrytis cinerea T4]	F:ion binding	0.395252	0.00217033	0.329314	0.00648463	0.245808	0.101889
Bcin07g04350.1	0.310575	1.76e-06	sphingomyelin phosphodiesterase	F:sphingomyelin phosphodiesterase activity; P:sphingomyelin catabolic process; F:hydrolase activity, acting on glycosyl bonds	0.188171	0.198235	0.406796	0.00067419	0.328608	0.0210564
Bcin09g02150.1	0.310519	1.76e-06	hypothetical protein BC1G_07175 [Botrytis cinerea B05.10]	no GO terms	0.348535	0.00797258	0.255969	0.0355332	0.244832	0.103433
Bcin04g03050.1	0.310452	1.77e-06	G coupled receptor family [Botrytis cinerea T4]	C:cellular_component; F:signal transducer activity	0.436191	0.000536628	0.41309	0.00056318	0.431416	0.00117769
Bcin12g01570.1	0.310319	1.79e-06	hypothetical protein BofuT4_P133590.1 [Botrytis cinerea T4]	no GO terms	0.226628	0.108334	0.373359	0.00192939	0.190125	0.22602
Bcin10g01160.1	0.310227	1.8e-06	hypothetical protein BcDW1_1959	no GO terms	0.404856	0.00158331	0.457447	0.000128556	0.300258	0.0382594
Bcin13g03210.1	0.309982	1.85e-06	lactoylglutathione lyase	F:lyase activity; F:ion binding	0.29064	0.0316555	0.275068	0.0235082	0.27854	0.058123
Bcin07g07080.1	0.309517	1.93e-06	acid phosphatase [Botrytis cinerea T4]	F:phosphatase activity	0.149078	0.328925	0.302428	0.0124663	0.15236	0.346928
Bcin15g02180.1	0.309104	2e-06		F:protein binding	0.394642	0.00219307	0.150014	0.231367	-0.0074471	0.973899
Bcin08g00990.1	0.308966	2.03e-06	[Botrytis cinerea ]	no GO terms	0.242946	0.0808928	0.313673	0.00943458	0.0181226	0.934885
Bcin13g02910.1	0.308724	2.07e-06	Copper fist DNA binding domain	C:nucleus; F:DNA binding; F:nucleic acid binding transcription factor activity; F:ion binding; P:cellular nitrogen compound metabolic process; P:biosynthetic process	0.164094	0.273076	0.386462	0.00130102	0.109088	0.519488
Bcin04g03230.1	0.308651	2.08e-06	short-chain dehydrogenase reductase sdr	F:oxidoreductase activity	0.31526	0.0179595	0.400488	0.000836397	0.383003	0.00512277
Bcin03g06980.1	0.308648	2.08e-06	prephenate dehydrogenase	F:oxidoreductase activity; P:cellular amino acid metabolic process; P:biosynthetic process	0.160757	0.284239	0.290939	0.0163661	0.17774	0.260099
Bcin02g07930.1	0.308502	2.1e-06	3-oxoacyl-acyl-carrier- reductase [Botrytis cinerea T4]	F:oxidoreductase activity	0.225488	0.110605	0.513809	1.16872e-05	0.266766	0.071808
Bcin07g06370.2	0.30847	2.1e-06	transcription factor C2H2 [Botrytis cinerea T4]	C:nucleus; F:DNA binding; F:ion binding; P:cellular nitrogen compound metabolic process; P:biosynthetic process	0.327387	0.0133985	0.359441	0.00286396	-0.151723	0.349518
Bcin11g06340.1	0.308431	2.1e-06	ubiquitin-conjugating enzyme E2 [Botrytis cinerea T4]	no GO terms	0.114962	0.474263	0.297192	0.0141635	0.0344411	0.862775
Bcin04g00410.1	0.308377	2.11e-06	f-box domain-containing [Botrytis cinerea 1]	F:protein binding	0.382528	0.00306251	0.125475	0.32112	0.0668068	0.713322
Bcin05g01120.1	0.308222	2.14e-06	dienelactone hydrolase family	F:molecular_function	0.348562	0.00797258	0.105073	0.410635	0.0624525	0.735606
Bcin10g05980.1	0.308135	2.15e-06	hypothetical protein BcDW1_2045	C:cellular_component	0.312914	0.019104	0.226953	0.0637771	0.278703	0.0579496
Bcin06g01360.1	0.308118	2.15e-06	calcium-dependent kinase	F:ion binding; P:cellular protein modification process; F:kinase activity	0.297192	0.0273199	0.477876	5.7838e-05	0.153079	0.344102
Bcin05g01240.1	0.308002	2.17e-06	stomatin family	C:cellular_component	0.289921	0.0320592	0.20936	0.0884876	-0.00552089	0.980849
Bcin08g04730.1	0.307966	2.18e-06	fructose-1,6-bisphosphatase [Botrytis cinerea ]	P:carbohydrate metabolic process; F:fructose 1,6-bisphosphate 1-phosphatase activity; P:dephosphorylation	0.0987656	0.553562	0.122531	0.333588	-0.012127	0.957252
Bcin02g06020.1	0.307886	2.19e-06	ran-interacting Mog1 [Botrytis cinerea T4]	no GO terms	0.218123	0.124934	0.204639	0.0958809	-0.0021975	0.992582
Bcin11g00630.1	0.307717	2.22e-06	transcription factor c2h2	no GO terms	0.185486	0.205951	0.376167	0.00178161	0.197965	0.202951
Bcin01g01120.1	0.307695	2.22e-06	hypothetical protein BofuT4_P145890.1	P:protein targeting; C:mitochondrion; P:mitochondrion organization	0.2965	0.0277312	0.398426	0.000895731	0.348847	0.0126456
Bcin02g07540.1	0.307201	2.33e-06	c2h2 transcription factor swi5	F:ion binding	0.212235	0.13702	0.249742	0.0404274	0.0192621	0.93026
Bcin10g03590.1	0.30717	2.33e-06	peroxisomal carrier [Botrytis cinerea 1]	P:transmembrane transport; C:cellular_component	0.290084	0.0319509	0.519466	9.05582e-06	0.408342	0.00247447
Bcin06g07120.1	0.307137	2.33e-06	salicylate hydroxylase	F:oxidoreductase activity; F:ion binding	0.509116	3.09731e-05	0.444493	0.000199699	0.427469	0.0013196
Bcin09g02820.1	0.307048	2.35e-06	regulator of calcineurin [Botrytis cinerea T4]	P:signal transduction; C:intracellular; F:molecular_function	0.276899	0.0420414	0.196256	0.110858	0.227849	0.134724
Bcin04g00150.1	0.307008	2.35e-06	hypothetical protein BcDW1_6722	C:cellular_component	0.409048	0.00139568	0.23478	0.0548307	0.452035	0.000554946
Bcin09g03380.1	0.306856	2.38e-06	hypothetical protein BC1G_15954 [Botrytis cinerea B05.10]	no GO terms	0.170673	0.251619	0.378445	0.00166838	0.220931	0.148963
Bcin09g00760.1	0.306665	2.42e-06	transcription factor C2H2 [Botrytis cinerea T4]	F:ion binding	0.242268	0.0819115	0.184129	0.136441	0.161286	0.315664
Bcin10g06000.1	0.306256	2.51e-06	hypothetical protein BcDW1_2043	no GO terms	0.435988	0.000539331	0.287873	0.0174916	0.273399	0.063586
Bcin03g06150.1	0.306219	2.52e-06	prolyl oligopeptidase	F:molecular_function	0.307122	0.0220736	0.348644	0.00387315	0.418313	0.00177117
Bcin02g06080.1	0.305992	2.57e-06	[Botrytis cinerea ]	no GO terms	0.130901	0.406298	0.267784	0.0276202	0.28455	0.051774
Bcin15g02270.1	0.305739	2.62e-06	glycogen synthase [Botrytis cinerea ]	P:glycogen biosynthetic process; F:glycogen (starch) synthase activity	0.26309	0.0550962	0.182257	0.141096	0.00831525	0.971201
Bcin16g00850.1	0.305738	2.62e-06	DUF618 domain-containing	no GO terms	0.229721	0.102737	0.407339	0.000664636	0.236964	0.117312
Bcin08g04030.1	0.30558	2.66e-06	betaine aldehyde dehydrogenase [Botrytis cinerea 1]	F:oxidoreductase activity	0.252862	0.0665517	0.282501	0.0198058	0.335106	0.0184449
Bcin08g04530.1	0.305373	2.71e-06	autophagy-related 3 [Botrytis cinerea T4]	C:cytoplasm; P:autophagy; P:transport	0.254124	0.0650609	0.321704	0.00774554	0.0863809	0.622704
Bcin06g05240.1	0.305204	2.75e-06		no GO terms	0.358871	0.00614828	0.372179	0.00199769	0.229151	0.132056
Bcin10g02660.1	0.305099	2.77e-06	hypothetical protein BC1G_04690 [Botrytis cinerea B05.10]	P:biological_process; F:lyase activity	0.105874	0.517818	0.423779	0.000389863	0.220442	0.150092
Bcin11g04710.1	0.304894	2.82e-06	glycerol dehydrogenase [Botrytis cinerea T4]	F:oxidoreductase activity; P:oxidation-reduction process	0.296419	0.0277814	0.147748	0.238888	0.184414	0.242542
Bcin08g03530.1	0.304756	2.85e-06	60S ribosomal L34	F:RNA binding; F:structural constituent of ribosome; P:ribosome biogenesis; C:cytosolic large ribosomal subunit; P:translation	0.120781	0.448028	0.354558	0.00331953	0.106308	0.532395
Bcin15g02040.1	0.304561	2.9e-06	ER to Golgi transport (Sly41) [Botrytis cinerea T4]	C:cellular_component	0.271243	0.0470201	0.263429	0.0302876	0.231552	0.126966
Bcin07g04130.1	0.304492	2.91e-06	multifunctional beta-oxidation [Botrytis cinerea T4]	F:oxidoreductase activity	0.442349	0.00044358	0.307081	0.0111556	0.234848	0.121918
Bcin02g08550.1	0.304453	2.92e-06	hypothetical protein BofuT4_P067880.1	no GO terms	0.388606	0.00265828	0.54121	3.38951e-06	0.360418	0.00939391
Bcin07g01540.1	0.304073	3.02e-06	elongation factor 2 [Botrytis cinerea T4]	F:GTP binding; F:translation elongation factor activity; F:GTPase activity; P:translational elongation	0.2535	0.0656758	0.34045	0.00478869	0.160879	0.3169
Bcin02g00850.1	0.304069	3.02e-06	cytoskeleton assembly control SLA1 [Botrytis cinerea T4]	F:ubiquitin-like protein binding; P:vesicle-mediated transport; P:cytoskeleton organization; F:cytoskeletal protein binding; F:protein binding, bridging	0.480358	0.00011091	0.215708	0.0787887	0.132108	0.424769
Bcin11g04150.1	0.303893	3.06e-06	ERB1_BOTFB ame: Full=Ribosome biogenesis erb1 ame: Full=Eukaryotic ribosome biogenesis 1	P:ribosome biogenesis; C:protein complex; P:cellular nitrogen compound metabolic process; C:nucleolus; F:molecular_function; C:nucleoplasm	0.0953066	0.569671	0.20548	0.0945285	0.366848	0.00784432
Bcin05g03230.1	0.303868	3.06e-06	phosphoketolase	F:aldehyde-lyase activity; P:carbohydrate metabolic process; F:catalytic activity; P:metabolic process	0.237751	0.0891489	0.315477	0.00902056	0.220483	0.150068
Bcin12g02070.1	0.303829	3.07e-06	sulfate transporter	F:transmembrane transporter activity; C:cellular_component	0.264989	0.0529895	0.403079	0.000764682	0.356755	0.0105298
Bcin16g00610.1	0.303778	3.08e-06	hypothetical protein BC1G_14649 [Botrytis cinerea B05.10]	C:nucleus	0.10974	0.499087	0.273467	0.0243923	0.366386	0.00791701
Bcin07g01090.1	0.303647	3.11e-06	hypothetical protein BofuT4_P116300.1	no GO terms	0.212303	0.136847	0.432325	0.000299656	0.158478	0.325265
Bcin11g04620.1	0.303513	3.15e-06	ADP-ribosylation factor [Botrytis cinerea ]	P:signal transduction; F:ion binding; C:intracellular	0.271229	0.0470201	0.443421	0.000206733	0.0703337	0.697288
Bcin07g07060.1	0.303414	3.17e-06	hypothetical protein BcDW1_8892	C:integral component of membrane	0.340152	0.0098236	0.281375	0.0203153	0.141644	0.385105
Bcin01g01910.2	0.303318	3.19e-06	wd domain-containing	F:protein binding	0.487805	8.13012e-05	0.508315	1.47361e-05	0.323752	0.0234662
Bcin15g05360.1	0.303119	3.25e-06	galactose-1-phosphate uridylyltransferase	P:small molecule metabolic process; P:carbohydrate metabolic process; F:nucleotidyltransferase activity; F:ion binding	-0.00348616	0.988981	0.430412	0.000315435	0.106253	0.532528
Bcin08g06200.1	0.303107	3.25e-06	dna polymerase gamma	F:DNA binding; F:nucleotidyltransferase activity; C:mitochondrion; P:biosynthetic process; P:DNA metabolic process	0.352645	0.00725593	0.358654	0.00292839	0.344249	0.0145414
Bcin06g03460.1	0.302711	3.36e-06	vacuolar sorting-associated vps17 [Botrytis cinerea T4]	P:vesicle-mediated transport; F:ion binding; C:cytosol; F:lipid binding; C:protein complex	0.239989	0.0855241	0.337005	0.00525256	0.119235	0.476728
Bcin11g02250.1	0.302698	3.36e-06	nuclear GTP-binding NUG1 [Botrytis cinerea T4]	F:GTP binding	0.0924308	0.586	0.248806	0.0412697	0.368489	0.00757807
Bcin04g05390.1	0.302658	3.36e-06	CIAO1_BOTFB ame: Full=Probable cytosolic iron-sulfur assembly 1	C:nucleus; P:nucleocytoplasmic transport; P:sulfur compound metabolic process; P:cofactor metabolic process; P:cellular component assembly; C:cytosol; P:ribosome biogenesis; P:tRNA metabolic process; C:protein complex; P:biosynthetic process	0.355548	0.00667459	0.228025	0.0625488	0.293706	0.0436904
Bcin13g05150.1	0.302551	3.39e-06	transcription factor bZIP [Botrytis cinerea T4]	F:DNA binding; F:nucleic acid binding transcription factor activity; P:cellular nitrogen compound metabolic process; P:biosynthetic process	0.26914	0.0489003	0.15955	0.2022	0.0590206	0.752327
Bcin03g08410.1	0.302448	3.42e-06	predicted protein	no GO terms	0.167621	0.260916	0.136815	0.277641	0.30662	0.0338114
Bcin11g04110.1	0.302382	3.44e-06		P:transmembrane transport; C:membrane; C:integral component of membrane; F:transporter activity	0.217105	0.127085	0.2371	0.0524504	0.106593	0.530911
Bcin08g06270.1	0.302195	3.49e-06	hypothetical protein BC1G_10998	P:metabolic process; F:hydrolase activity	0.308695	0.0211698	0.466061	9.32897e-05	0.515098	3.59952e-05
Bcin02g09290.1	0.301427	3.75e-06	histone chaperone [Botrytis cinerea 1]	C:nucleus; P:macromolecular complex assembly; F:histone binding; P:chromosome organization; P:cellular protein modification process; P:cellular nitrogen compound metabolic process; P:biosynthetic process	0.0527672	0.77928	0.334699	0.00558083	0.275068	0.0614077
Bcin04g02360.1	0.301251	3.81e-06	c4-dicarboxylate transporter malic acid transport [Botrytis cinerea 1]	P:transmembrane transport; C:cellular_component	0.259034	0.0599296	0.200095	0.103721	0.0335458	0.866187
Bcin11g03360.1	0.301194	3.82e-06	mucin [Botrytis cinerea 1]	no GO terms	0.215749	0.129881	0.361937	0.00269258	0.170198	0.284458
Bcin05g00680.1	0.301139	3.83e-06		F:phosphorelay sensor kinase activity; F:protein binding; P:signal transduction; P:phosphorelay signal transduction system; P:phosphorylation; F:transferase activity, transferring phosphorus-containing groups	0.397491	0.00200177	0.38923	0.00120635	0.147368	0.365034
Bcin05g08310.1	0.301062	3.86e-06	hypothetical protein BofuT4_P103150.1	C:cellular_component	0.319628	0.0162954	0.327469	0.00677359	0.309807	0.0314868
Bcin15g05330.1	0.300988	3.88e-06	putative mmp37-like protein	F:phosphatidate cytidylyltransferase activity; P:cardiolipin biosynthetic process	0.255168	0.0638055	0.219357	0.0737175	0.164921	0.302843
Bcin07g00310.1	0.30096	3.88e-06	hypothetical protein BC1G_05375	F:oxidoreductase activity; P:oxidation-reduction process	0.389826	0.00259864	0.337195	0.00523303	0.143326	0.379765
Bcin06g06310.1	0.300693	3.97e-06	hypothetical protein BofuT4_P143390.1	no IPS match	0.18455	0.208546	0.278825	0.0216107	0.076465	0.670872
Bcin09g02730.1	0.300609	4e-06	hypothetical protein BofuT4_P054050.1	F:oxidoreductase activity; F:ion binding	0.318557	0.0166099	0.509007	1.44737e-05	0.393964	0.00388223
Bcin05g01030.1	0.300568	4e-06	xylitol dehydrogenase [Botrytis cinerea ]	F:oxidoreductase activity; F:ion binding	0.418787	0.000988045	0.408424	0.000644415	0.276628	0.0598191
Bcin13g04410.1	0.300394	4.06e-06	histone H3	C:nucleus; F:DNA binding; C:chromosome	0.29551	0.0284134	0.259007	0.0332661	-0.00606348	0.978503
Bcin14g03090.1	0.300372	4.06e-06	hypothetical protein BC1G_10064	no GO terms	0.258166	0.0608057	0.404178	0.00073721	0.0473277	0.808455
Bcin06g01200.1	0.300342	4.07e-06	DUF757 domain-containing [Botrytis cinerea T4]	no GO terms	0.101492	0.539519	0.201017	0.102112	0.262629	0.0763303
Bcin13g05630.1	0.300324	4.07e-06	hypothetical protein BC1G_06385 [Botrytis cinerea B05.10]	F:ion binding	0.26956	0.0485077	0.172897	0.163839	0.207027	0.180491
Bcin11g00190.1	0.300192	4.11e-06	hypothetical protein BofuT4_P026400.1	C:cellular_component	0.298454	0.0266233	0.202727	0.0991148	0.308749	0.0321566
Bcin04g05800.1	0.299911	4.22e-06			0.0244167	0.907017	0.280738	0.0206105	0.256389	0.083202
Bcin02g04710.1	0.299779	4.26e-06			0.191047	0.190149	0.371297	0.00203583	0.232908	0.124441
Bcin16g01350.1	0.299549	4.34e-06	eukaryotic translation initiation factor 5 [Botrytis cinerea T4]	F:translation initiation factor activity; P:translational initiation	0.0390532	0.844705	0.432664	0.000295651	0.269316	0.0684885
Bcin07g05750.1	0.299547	4.34e-06			0.219995	0.121123	0.46701	9.05318e-05	0.344154	0.0145585
Bcin02g05690.1	0.299377	4.4e-06			0.176397	0.232973	0.459007	0.000120517	0.0981145	0.568756
Bcin01g08400.1	0.299372	4.4e-06			0.209712	0.142801	0.431525	0.000304604	0.216698	0.157604
Bcin16g02050.1	0.299162	4.48e-06			0.123942	0.434546	0.254707	0.036372	0.18417	0.243064
Bcin12g00360.1	0.299059	4.51e-06			0.13809	0.374427	0.230901	0.0590984	0.0315654	0.875022
Bcin01g06560.1	0.299039	4.51e-06			0.487425	8.13012e-05	0.409238	0.00062895	0.396812	0.00364057
Bcin10g02620.1	0.29901	4.52e-06			0.386734	0.00279221	0.224064	0.0672392	0.21758	0.155782
Bcin12g00690.1	0.29888	4.57e-06	Bcnrps2		0.227835	0.106332	0.291169	0.0162656	0.211123	0.170584
Bcin04g00250.1	0.298793	4.6e-06			0.313985	0.0185216	0.177916	0.1513	0.168719	0.290071
Bcin13g04920.1	0.298364	4.77e-06			0.255467	0.0636102	0.386584	0.00129739	0.355969	0.0107148
Bcin08g04890.1	0.298343	4.77e-06	arrestin domain-containing [Botrytis cinerea 1]	no GO terms	0.433654	0.000573462	0.0756375	0.563661	0.0732366	0.684143
Bcin15g00150.1	0.298197	4.83e-06			0.500027	4.77927e-05	0.518448	9.47554e-06	0.356498	0.010577
Bcin01g06500.1	0.297909	4.95e-06			0.20175	0.161178	0.383912	0.00140563	0.201818	0.193604
Bcin16g02920.1	0.297782	5e-06			0.143082	0.352411	0.343407	0.0044601	0.224498	0.141845
Bcin11g04570.1	0.297707	5.03e-06			0.277645	0.0413197	0.198698	0.106368	0.143448	0.379493
Bcin11g00220.1	0.297686	5.03e-06	hypothetical protein BC1G_09668	no GO terms	0.199349	0.16754	0.170917	0.169004	0.142187	0.383538
Bcin16g05190.1	0.297509	5.11e-06			0.433152	0.000582217	0.348114	0.00392601	0.299851	0.0384182
Bcin10g03800.1	0.297439	5.13e-06			0.288863	0.0326989	0.430982	0.000310011	0.173169	0.27576
Bcin12g03940.1	0.297416	5.13e-06			0.249715	0.0703154	0.389243	0.00120635	0.304286	0.0353376
Bcin12g04290.1	0.297391	5.14e-06			0.206593	0.150079	0.388633	0.0012303	0.276709	0.0598191
Bcin01g02840.1	0.297369	5.14e-06			0.575746	8.15882e-07	0.418787	0.0004619	0.55217	4.88142e-06
Bcin06g07520.1	0.297048	5.28e-06			0.175176	0.236987	0.341319	0.0047097	0.355209	0.0109293
Bcin06g05650.1	0.297025	5.28e-06			0.356864	0.00650913	0.310391	0.0101939	0.267065	0.0715535
Bcin16g02630.1	0.29701	5.28e-06			0.199417	0.167395	0.228771	0.061664	0.211788	0.169368
Bcin14g05570.1	0.29694	5.3e-06	tyrosinase central domain [Botrytis cinerea T4]	F:oxidoreductase activity; F:metal ion binding; P:oxidation-reduction process	-0.00448996	0.985633	0.276139	0.0229633	0.208152	0.177681
Bcin05g07160.1	0.296786	5.37e-06			0.0962154	0.565707	0.292675	0.0157338	0.348426	0.0128209
Bcin11g00690.1	0.296466	5.52e-06			0.131308	0.404175	0.311883	0.0098768	0.165491	0.301136
Bcin10g01240.1	0.296457	5.52e-06			0.267065	0.0509534	0.452821	0.000153017	0.191278	0.222505
Bcin12g00040.1	0.296313	5.59e-06			0.366061	0.00511321	0.444683	0.000199538	0.442241	0.000805513
Bcin02g02150.1	0.296136	5.66e-06			0.243421	0.0803799	0.208844	0.0892206	0.071663	0.6919
Bcin12g03180.1	0.29613	5.66e-06			0.565708	1.62546e-06	0.564976	9.146e-07	0.410431	0.00230256
Bcin12g05220.1	0.296127	5.66e-06			0.114786	0.474944	0.382379	0.00146927	0.279083	0.0575321
Bcin04g00280.1	0.296109	5.66e-06			0.415857	0.00108771	0.289433	0.0168905	0.0374661	0.849992
Bcin02g00220.1	0.295918	5.75e-06			0.306959	0.0221311	0.466495	9.18973e-05	0.128337	0.440017
Bcin03g05960.1	0.295772	5.82e-06	elongation factor 1 gamma domain-containing [Botrytis cinerea ]	F:translation elongation factor activity; P:translational elongation	0.149457	0.32708	0.362249	0.002671	0.114596	0.495505
Bcin16g01440.1	0.295553	5.93e-06			0.435309	0.000548516	0.32812	0.00666835	0.464352	0.000350904
Bcin04g06720.1	0.295479	5.96e-06	serine threonine- kinase ssp1 [Botrytis cinerea T4]	F:ATP binding; F:protein kinase activity; P:protein phosphorylation	0.451044	0.000328942	0.173494	0.162076	0.101072	0.555197
Bcin05g03380.1	0.2954	5.99e-06			0.301302	0.0249933	0.317187	0.00863499	0.291101	0.0458302
Bcin02g03580.1	0.295291	6.04e-06			0.138511	0.372655	0.371405	0.00202962	0.39163	0.00414
Bcin02g01380.1	0.295206	6.07e-06			0.117512	0.462382	0.242987	0.0465929	0.315355	0.0279524
Bcin10g02060.1	0.295202	6.07e-06	oxidoreductase [Botrytis cinerea T4]	F:oxidoreductase activity; P:oxidation-reduction process	0.240423	0.0849363	0.147938	0.238392	0.0750136	0.676519
Bcin04g01690.1	0.29514	6.1e-06	hypothetical protein BofuT4_P115970.1	F:nucleotide binding; F:nucleic acid binding; F:ATP binding; F:helicase activity; F:hydrolase activity	0.221609	0.118132	0.412832	0.000565107	0.159468	0.321917
Bcin16g01160.1	0.29509	6.12e-06			0.253079	0.0663263	0.28261	0.0197619	0.236096	0.119046
Bcin15g02780.1	0.294915	6.21e-06			0.19026	0.192178	0.276519	0.0227571	0.203188	0.189699
Bcin14g02360.1	0.294762	6.28e-06			0.173332	0.243209	0.289012	0.0170981	0.25373	0.0878158
Bcin12g01450.1	0.294751	6.28e-06			0.21267	0.136058	0.429883	0.000318446	0.311096	0.030586
Bcin12g03260.1	0.294743	6.28e-06			0.309916	0.0206713	0.211503	0.0850282	0.189352	0.22914
Bcin14g00820.1	0.29471	6.28e-06			0.360404	0.00596014	0.134441	0.28665	0.0286625	0.888152
Bcin11g04350.2	0.294659	6.3e-06			0.175678	0.235404	0.315369	0.00903129	0.204409	0.186453
Bcin03g04170.1	0.294548	6.36e-06			0.223169	0.115274	0.368462	0.00222958	0.21267	0.167161
Bcin08g05080.2	0.29399	6.69e-06			0.31994	0.0162247	0.207447	0.09122	0.206918	0.180596
Bcin11g06460.1	0.293913	6.73e-06			0.413999	0.00117867	0.510228	1.37588e-05	0.307528	0.0331245
Bcin01g09650.1	0.29389	6.73e-06	glucose-6-phosphate 1-dehydrogenase	P:carbohydrate metabolic process; F:NADP binding; P:pentose-phosphate shunt; F:oxidoreductase activity; P:oxidation-reduction process; P:glucose metabolic process; F:glucose-6-phosphate dehydrogenase activity	0.418692	0.000988045	0.461449	0.00011076	0.301519	0.0372368
Bcin03g01090.1	0.293843	6.75e-06			0.042146	0.830824	0.349783	0.00376076	0.299661	0.0385071
Bcin02g07400.2	0.2938	6.76e-06			0.451533	0.000322815	0.108424	0.395245	0.218299	0.154398
Bcin13g01680.1	0.293769	6.77e-06			0.145469	0.343382	0.202632	0.0992906	0.104151	0.541818
Bcin13g02240.1	0.293743	6.78e-06	importin subunit beta-4 [Botrytis cinerea T4]	P:intracellular protein transport; F:binding; F:Ran GTPase binding	0.094045	0.576694	0.331972	0.00603379	0.190912	0.223811
Bcin11g06280.1	0.29354	6.89e-06			0.243991	0.0795025	0.331348	0.0061344	0.266264	0.0723868
Bcin01g03020.1	0.293396	6.98e-06			0.360689	0.00594538	0.473237	7.00026e-05	0.300149	0.038346
Bcin11g02620.1	0.293336	7e-06			0.33223	0.0117943	0.356891	0.00309351	0.323128	0.0236776
Bcin09g05250.1	0.29327	7.03e-06			0.35388	0.00698221	0.295496	0.0147217	0.119262	0.476728
Bcin02g03300.1	0.293225	7.05e-06			0.292349	0.0305121	0.164609	0.187403	0.143353	0.379673
Bcin01g06640.1	0.293172	7.08e-06	ATP phosphoribosyltransferase [Botrytis cinerea ]	F:magnesium ion binding; F:transferase activity, transferring glycosyl groups; C:cytoplasm; F:ATP phosphoribosyltransferase activity; P:histidine biosynthetic process; F:transferase activity	0.117743	0.461775	0.355629	0.00321397	0.32325	0.0236776
Bcin14g02520.1	0.292865	7.27e-06	U3 small nucleolar ribonucleo IMP4 [Botrytis cinerea T4]	C:intracellular ribonucleoprotein complex; C:viral nucleocapsid	0.190871	0.190522	0.205494	0.0945236	0.166563	0.297161
Bcin05g00440.1	0.292758	7.33e-06			0.198169	0.170718	0.10312	0.420446	0.127971	0.441561
Bcin10g03520.1	0.292557	7.45e-06			0.304761	0.0231189	0.309794	0.0103626	0.172884	0.276338
Bcin01g06220.1	0.292414	7.54e-06	GTP-binding nuclear ran-1 [Botrytis cinerea ]	F:nucleotide binding; F:GTP binding; P:nucleocytoplasmic transport; C:nucleus; P:small GTPase mediated signal transduction; P:signal transduction; F:GTPase activity; P:protein transport; P:intracellular protein transport; P:transport	0.0597124	0.744603	0.407081	0.00066832	0.14197	0.384085
Bcin12g02170.1	0.292354	7.57e-06			0.334007	0.0113325	0.419737	0.000449365	0.30255	0.0365242
Bcin03g05740.1	0.292181	7.68e-06			0.173684	0.242135	0.231701	0.0581417	0.18653	0.23652
Bcin10g03780.1	0.292031	7.78e-06			0.261788	0.0563565	0.381362	0.00151545	0.193516	0.215785
Bcin07g02180.1	0.29201	7.78e-06			0.215274	0.130881	0.44939	0.000173403	0.28984	0.0469979
Bcin08g03080.1	0.291948	7.81e-06			0.203378	0.157454	0.303608	0.0121082	0.266576	0.0720228
Bcin12g01280.1	0.291913	7.81e-06			0.375393	0.00383126	0.249403	0.0407497	0.116088	0.489538
Bcin09g01000.1	0.291907	7.81e-06			0.0619099	0.7351	0.410947	0.000596545	0.390274	0.00428735
Bcin10g00460.1	0.291891	7.81e-06	AMP binding domain [Botrytis cinerea T4]	F:catalytic activity; P:metabolic process	0.442295	0.00044358	0.264121	0.0298603	0.20837	0.176958
Bcin16g00120.1	0.291874	7.81e-06			0.385988	0.00285383	0.336883	0.00527216	0.219832	0.151377
Bcin08g04890.2	0.291828	7.83e-06			0.408953	0.00139568	0.0799783	0.538562	0.0972735	0.573343
Bcin08g03150.1	0.291583	8e-06			-0.028337	0.89197	0.332434	0.00596282	0.0768719	0.668633
Bcin15g02660.1	0.291248	8.24e-06			0.519167	1.88586e-05	0.284767	0.0188372	0.461177	0.000400885
Bcin16g03170.1	0.291218	8.25e-06			0.178133	0.227946	0.367458	0.00230774	0.210404	0.172185
Bcin08g02970.1	0.291121	8.31e-06	pectin methyl esterase [Botrytis cinerea]	P:pectin catabolic process; C:cell wall; F:aspartyl esterase activity; C:extracellular region; P:cell wall modification; F:pectinesterase activity	0.106199	0.516595	0.419723	0.000449365	0.257298	0.0823709
Bcin10g01550.1	0.29094	8.44e-06	peptide transporter [Botrytis cinerea T4]	C:integral component of membrane; P:transport; F:transporter activity	0.182474	0.215088	0.377157	0.00173494	0.248454	0.0964765
Bcin16g01170.1	0.290877	8.47e-06			0.138104	0.374421	0.339352	0.00493959	0.100665	0.557304
Bcin13g00980.1	0.290671	8.62e-06			0.389853	0.00259864	0.105005	0.410876	0.180982	0.251247
Bcin04g04630.1	0.290526	8.72e-06			0.173508	0.242671	0.275258	0.023407	0.035255	0.859614
Bcin08g05970.1	0.290463	8.75e-06			0.245524	0.0771762	0.162412	0.19396	0.194262	0.213615
Bcin04g01420.1	0.290458	8.75e-06			0.243353	0.0803843	0.218475	0.0749992	0.143584	0.379493
Bcin06g05390.1	0.290174	8.97e-06			0.212059	0.137288	0.228744	0.0616909	0.0910201	0.600611
Bcin02g04220.1	0.290018	9.07e-06	60S ribosomal L4 [Botrytis cinerea T4]	F:structural constituent of ribosome; C:ribosome; P:translation	0.190898	0.190522	0.330969	0.00620073	0.136625	0.404406
Bcin09g01230.1	0.290017	9.07e-06			0.216617	0.128108	0.192689	0.118109	0.31956	0.0254061
Bcin12g01350.1	0.289922	9.13e-06	ubiquitin-activating enzyme E1 1	F:ATP binding; P:cellular protein modification process; F:small protein activating enzyme activity	0.344655	0.00870975	0.305209	0.0117125	0.0681905	0.707691
Bcin16g01240.1	0.289723	9.29e-06			0.387697	0.00272098	0.426004	0.000359798	0.312995	0.0294248
Bcin02g05900.1	0.289697	9.3e-06			0.321921	0.015363	0.400827	0.000824822	0.282759	0.0538275
Bcin08g03700.1	0.289675	9.3e-06	cell division control cdc48 [Botrytis cinerea 1]	P:cell division; F:ATP binding; F:hydrolase activity	0.441929	0.00044443	0.125475	0.32112	-0.00560228	0.980638
Bcin06g04520.1	0.28966	9.3e-06	catalase [Botrytis cinerea T4]	F:peroxidase activity; P:response to oxidative stress; F:oxidoreductase activity; F:metal ion binding; F:catalase activity; P:cellular oxidant detoxification; P:oxidation-reduction process; F:heme binding; P:hydrogen peroxide catabolic process	0.333098	0.0115661	0.253608	0.0372973	0.268258	0.0700511
Bcin09g01150.2	0.289637	9.3e-06			0.317173	0.0172502	0.335052	0.00553001	0.104341	0.540686
Bcin03g07360.1	0.289598	9.32e-06			0.194167	0.182386	0.14163	0.26009	0.269045	0.0687967
Bcin01g03000.1	0.289313	9.54e-06	inorganic pyrophosphatase	F:magnesium ion binding; F:inorganic diphosphatase activity; C:cytoplasm; P:phosphate-containing compound metabolic process	0.182596	0.214659	0.400041	0.000848546	0.0905996	0.602382
Bcin04g06240.1	0.289308	9.54e-06			0.349729	0.00772587	0.405372	0.000706533	0.278201	0.05858
Bcin06g02320.1	0.289226	9.6e-06			0.31975	0.0162613	0.361747	0.00270741	0.232271	0.125629
Bcin12g06310.1	0.28907	9.73e-06			0.219886	0.121351	0.387778	0.00125797	0.293394	0.0437563
Bcin01g07690.1	0.289036	9.73e-06			0.431932	0.000598389	0.349173	0.00381808	0.211652	0.169524
Bcin02g00850.2	0.289026	9.73e-06			0.329938	0.0124815	0.310431	0.0101899	0.117634	0.483102
Bcin01g02910.1	0.288891	9.84e-06			0.19433	0.182024	0.360621	0.00278352	0.199756	0.197924
Bcin12g00670.1	0.288843	9.86e-06			0.282366	0.0373745	0.335024	0.00553193	0.245727	0.101889
Bcin05g08340.1	0.28884	9.86e-06			0.294533	0.0289991	0.261286	0.031772	0.372165	0.00685108
Bcin14g04490.1	0.288811	9.87e-06			0.26701	0.0509534	0.166468	0.181736	0.26834	0.0699442
Bcin13g05260.1	0.288782	9.88e-06			0.297219	0.0273192	0.172179	0.165712	0.190993	0.223492
Bcin03g03480.1	0.288714	9.92e-06			0.365057	0.00527338	0.377998	0.00169003	0.249932	0.0938985
Bcin06g04300.1	0.288388	1.02e-05	pyridoxamine phosphate oxidase [Botrytis cinerea T4]	F:pyridoxamine-phosphate oxidase activity; P:pyridoxal phosphate biosynthetic process; F:FMN binding; P:oxidation-reduction process	0.417187	0.00104143	0.297599	0.0140447	0.198874	0.200484
Bcin12g04090.1	0.288379	1.02e-05			0.260581	0.0578851	0.375922	0.00179227	0.304137	0.0353647
Bcin06g00022.1	0.288364	1.02e-05			0.388958	0.00263204	0.501058	2.06628e-05	0.417241	0.00183436
Bcin13g02050.1	0.288146	1.04e-05			0.227876	0.106268	0.324959	0.00720962	0.186639	0.236309
Bcin04g05050.2	0.288072	1.04e-05			0.292892	0.0301303	0.0866251	0.503876	0.0542051	0.774954
Bcin13g01340.4	0.288	1.05e-05			0.287046	0.0338974	0.215003	0.0797588	0.377198	0.00603517
Bcin15g01260.1	0.287701	1.08e-05			0.221636	0.118101	0.270605	0.0259852	0.337127	0.0175313
Bcin12g04150.2	0.287674	1.08e-05			0.258641	0.0603652	0.184495	0.135636	0.184875	0.241622
Bcin05g03150.1	0.287551	1.09e-05	3-hydroxy-3-methylglutaryl-coenzyme A (HMG- ) reductase isozyme [Botrytis cinerea T4]	C:endoplasmic reticulum membrane; F:NADP binding; C:integral component of membrane; P:coenzyme A metabolic process; P:oxidation-reduction process; P:isoprenoid biosynthetic process; F:hydroxymethylglutaryl-CoA reductase (NADPH) activity	0.557447	2.51026e-06	0.613619	0	0.500285	7.63834e-05
Bcin03g00610.1	0.287294	1.11e-05			0.0517499	0.783502	0.333302	0.00579723	0.340654	0.0159292
Bcin07g01430.1	0.287162	1.12e-05			0.155304	0.304571	0.379259	0.0016243	0.164691	0.303691
Bcin10g02230.1	0.287062	1.13e-05			0.325421	0.0140773	0.420171	0.000446766	0.222436	0.146019
Bcin12g00900.1	0.287004	1.14e-05	NAD-dependent epimerase dehydratase	F:coenzyme binding; F:catalytic activity	0.273182	0.0454956	0.0829626	0.522777	0.192607	0.218346
Bcin13g00980.2	0.286293	1.21e-05			0.22481	0.111959	0.17561	0.156838	0.216332	0.158482
Bcin08g01660.1	0.286259	1.21e-05	hypothetical protein BC1G_07889 [Botrytis cinerea B05.10]	F:lipid binding	0.387032	0.0027635	0.0923087	0.474409	0.19551	0.209995
Bcin08g00240.1	0.286199	1.22e-05			0.315342	0.0179463	0.411367	0.000591988	0.365369	0.00814877
Bcin10g05040.1	0.286106	1.23e-05			0.175027	0.237243	0.152537	0.223388	0.173209	0.27576
Bcin03g05310.1	0.285883	1.25e-05	importin 13	F:binding	0.297965	0.0268898	0.352252	0.00351147	0.0866658	0.621333
Bcin10g05430.1	0.28585	1.25e-05	40S ribosomal S3 [Botrytis cinerea ]	F:RNA binding; F:structural constituent of ribosome; C:small ribosomal subunit; P:translation	0.120374	0.449289	0.376316	0.00177621	0.147572	0.364228
Bcin09g05430.1	0.285836	1.25e-05			0.219479	0.122085	0.326289	0.00696699	0.175041	0.269715
Bcin11g02220.1	0.285811	1.25e-05			0.224037	0.113445	0.501356	2.04419e-05	0.27873	0.0579496
Bcin06g01310.1	0.285807	1.25e-05			0.166834	0.264076	0.344981	0.00427118	0.203215	0.189699
Bcin14g05440.1	0.285753	1.26e-05			0.169167	0.256304	0.259767	0.032768	0.230453	0.129418
Bcin06g02900.1	0.285707	1.26e-05			0.0271568	0.896171	0.438619	0.000244982	0.540098	9.34047e-06
Bcin14g05010.1	0.285675	1.26e-05			0.152008	0.31686	0.417309	0.000486173	0.366875	0.00784432
Bcin04g05830.1	0.285661	1.26e-05			0.246351	0.0757905	0.312208	0.00981318	0.090803	0.601501
Bcin02g04060.1	0.285598	1.27e-05			0.26526	0.0526	0.432651	0.000295651	-0.0127916	0.954252
Bcin02g01420.1	0.285562	1.27e-05			0.333695	0.011431	0.463239	0.000104239	0.371148	0.00705422
Bcin11g03810.1	0.285343	1.29e-05			0.112873	0.483554	0.110703	0.384939	0.125176	0.452829
Bcin01g11220.1	0.285023	1.33e-05			0.405928	0.00154244	0.564447	9.31438e-07	0.445157	0.000716026
Bcin02g04270.1	0.28495	1.33e-05			0.266183	0.0516533	0.373454	0.00192576	0.380738	0.0054858
Bcin04g02730.1	0.284946	1.33e-05			0.129788	0.411332	0.255507	0.0357757	0.206593	0.181462
Bcin03g06810.1	0.284847	1.34e-05			0.258668	0.0603533	0.287168	0.0178007	0.195347	0.210603
Bcin09g06230.1	0.284538	1.38e-05	[Botrytis cinerea ]	no GO terms	0.385038	0.00291222	0.243719	0.0459691	0.249349	0.0946996
Bcin03g01960.1	0.284427	1.39e-05			0.35959	0.00606292	0.277184	0.0224151	0.342431	0.0151756
Bcin12g04280.1	0.284414	1.39e-05			0.315613	0.0177959	0.457895	0.000126001	0.10742	0.526789
Bcin02g09370.1	0.284405	1.39e-05			0.239392	0.0865677	0.274335	0.0239501	0.142811	0.381877
Bcin04g02870.1	0.284396	1.39e-05			0.205534	0.152529	0.27854	0.0217518	0.171202	0.28126
Bcin09g00120.1	0.28435	1.39e-05			0.187181	0.200853	0.341264	0.00471604	0.119683	0.475352
Bcin01g02510.1	0.284246	1.4e-05			0.172816	0.244555	0.373318	0.00193066	0.265084	0.0735245
Bcin06g01830.1	0.284051	1.42e-05			0.174552	0.238977	0.391861	0.00111446	0.0733315	0.68343
Bcin03g07550.1	0.284047	1.42e-05			0.26777	0.0502277	0.435689	0.000265418	0.254788	0.0861101
Bcin04g03610.1	0.283987	1.43e-05			0.275366	0.0433332	0.227455	0.0632072	0.188456	0.230816
Bcin09g02180.1	0.283955	1.43e-05			0.014433	0.947309	0.370795	0.00206504	0.225258	0.140183
Bcin04g02520.1	0.283638	1.47e-05			0.370171	0.00448193	0.43573	0.000265418	0.263402	0.0750588
Bcin08g00510.1	0.283451	1.49e-05			0.181348	0.218464	0.146758	0.242342	0.155575	0.333836
Bcin11g06370.1	0.283451	1.49e-05			0.290776	0.0315532	0.237303	0.0522396	0.32675	0.0220025
Bcin04g04260.1	0.283357	1.5e-05			0.193787	0.183398	0.329219	0.00650307	0.2078	0.178601
Bcin07g01600.1	0.28335	1.5e-05			0.246527	0.0754619	0.225149	0.0657441	-0.00672816	0.977019
Bcin03g01820.1	0.283227	1.51e-05	60S ribosomal L1 [Botrytis cinerea ]	F:RNA binding; F:structural constituent of ribosome; C:large ribosomal subunit; P:translation	0.0553852	0.766925	0.326207	0.00697909	0.174403	0.271898
Bcin07g05250.1	0.283201	1.51e-05			0.31819	0.0167708	0.346351	0.00412027	0.159523	0.321762
Bcin13g04800.1	0.283194	1.51e-05			0.272328	0.0462186	0.323196	0.00750599	0.251316	0.0916393
Bcin13g00550.1	0.283116	1.52e-05	curved DNA-binding [Botrytis cinerea T4]	F:DNA binding; F:hydrolase activity	0.0275909	0.895516	0.440871	0.000226058	0.227252	0.135814
Bcin06g01580.1	0.283097	1.52e-05			0.309862	0.020689	0.312751	0.00968084	0.206796	0.180935
Bcin11g05510.1	0.283048	1.53e-05			0.219289	0.122361	0.309373	0.0104821	0.20118	0.195057
Bcin12g00730.1	0.282981	1.53e-05			0.113606	0.480603	0.434835	0.000274307	0.194208	0.213623
Bcin03g06940.1	0.282825	1.55e-05	EIF3C_BOTFB, Eukaryotic translation initiation factor 3 subunit C	C:multi-eIF complex; F:translation initiation factor activity; P:formation of translation preinitiation complex; C:cytoplasmic stress granule; C:eukaryotic 43S preinitiation complex; C:eukaryotic 48S preinitiation complex; F:translation initiation factor binding; P:regulation of translational initiation; C:eukaryotic translation initiation factor 3 complex	0.108451	0.505063	0.357189	0.00306484	0.206999	0.180491
Bcin12g03690.1	0.282811	1.55e-05			0.525868	1.3275e-05	0.407311	0.000664636	0.40997	0.0023081
Bcin16g04280.1	0.282613	1.58e-05			0.358098	0.00630186	0.353947	0.00335913	0.322029	0.0240643
Bcin02g05510.1	0.282579	1.58e-05			-0.0313619	0.879589	0.294696	0.0149463	0.304761	0.0350557
Bcin03g05720.1	0.282489	1.59e-05	[Botrytis cinerea ]	no GO terms	-0.111313	0.490954	0.443475	0.000206733	0.147965	0.363098
Bcin01g05830.1	0.282375	1.6e-05			0.437859	0.000504809	0.420578	0.000439847	0.490912	0.000118547
Bcin06g06300.1	0.282374	1.6e-05			0.232081	0.0982046	0.388307	0.00123699	0.26233	0.076491
Bcin02g05200.1	0.282258	1.62e-05			0.276099	0.0427563	0.332569	0.00594075	0.123616	0.460071
Bcin03g04970.1	0.282236	1.62e-05			0.325936	0.0139361	0.0521161	0.697989	-0.0193299	0.930135
Bcin02g04910.1	0.282209	1.62e-05			0.194018	0.182743	0.241278	0.0482861	0.148657	0.360534
Bcin10g03750.1	0.282099	1.63e-05			0.263823	0.0541585	0.338985	0.00498746	0.112127	0.50792
Bcin15g01360.1	0.282042	1.64e-05			0.438334	0.000499829	0.302903	0.0123161	0.263578	0.0748593
Bcin08g06550.1	0.281999	1.64e-05			0.260784	0.0575785	0.289514	0.0168606	0.190722	0.224223
Bcin11g03770.1	0.2819	1.66e-05			0.0735214	0.678755	0.207786	0.090611	0.229015	0.132235
Bcin08g00010.1	0.281825	1.67e-05			0.413538	0.00119531	0.354069	0.00335327	0.458926	0.000438159
Bcin03g09318.1	0.281657	1.69e-05			0.355345	0.00669345	0.438009	0.000247983	0.316332	0.0275572
Bcin07g02000.1	0.281629	1.69e-05			0.137249	0.377482	0.363456	0.00258608	0.318435	0.0261202
Bcin05g05310.1	0.281371	1.73e-05			0.136205	0.381324	0.263823	0.0300212	0.085038	0.629302
Bcin03g04900.1	0.281353	1.73e-05			0.0340477	0.868769	0.312629	0.00970165	0.215776	0.159954
Bcin15g04110.1	0.281345	1.73e-05			0.0264514	0.898518	0.247572	0.0421976	0.0996744	0.561138
Bcin04g01060.1	0.281211	1.74e-05			0.250515	0.069199	0.447762	0.000181659	0.182284	0.247605
Bcin06g06610.1	0.281208	1.74e-05			0.0863673	0.613908	0.305168	0.0117229	0.351723	0.0118482
Bcin16g01530.1	0.281193	1.74e-05			0.123318	0.436896	0.464284	9.93414e-05	0.35704	0.0104718
Bcin10g05630.1	0.281104	1.75e-05			0.389026	0.00263204	0.494425	2.81306e-05	0.344737	0.0144136
Bcin13g01020.1	0.280852	1.79e-05	predicted protein	no GO terms	0.230846	0.100545	0.228093	0.0624724	0.206633	0.181414
Bcin16g03660.1	0.28084	1.79e-05			0.190193	0.192337	0.375298	0.00182347	0.281321	0.0551736
Bcin10g01270.1	0.280673	1.82e-05			0.193394	0.184471	0.228785	0.0616586	0.220022	0.150895
Bcin10g04660.1	0.280644	1.82e-05			0.355575	0.00667459	0.291536	0.0161432	0.292661	0.0442649
Bcin09g03810.1	0.279846	1.95e-05			0.283247	0.0367356	0.328513	0.00660947	0.243448	0.105982
Bcin11g05550.1	0.279814	1.95e-05			0.0417661	0.832044	0.318231	0.00838708	0.03672	0.853031
Bcin04g05430.1	0.279795	1.95e-05			0.333912	0.0113576	0.136042	0.280611	0.306294	0.034018
Bcin02g03870.1	0.279725	1.96e-05			0.243204	0.0804893	0.371283	0.00203583	0.212737	0.167095
Bcin07g00740.1	0.279707	1.96e-05			0.202198	0.160125	0.2164	0.0779499	0.296093	0.0416535
Bcin06g04740.1	0.279588	1.98e-05			0.187493	0.20005	0.335241	0.005502	0.153079	0.344102
Bcin07g02820.1	0.279505	1.99e-05			0.0405724	0.836816	0.366129	0.00239262	0.139392	0.393665
Bcin06g03290.1	0.279483	1.99e-05			0.146894	0.337296	0.373644	0.00191251	0.159238	0.322725
Bcin08g04680.1	0.279479	1.99e-05	WD repeat-containing [Botrytis cinerea T4]	F:protein binding	0.164853	0.270855	0.233899	0.0556928	0.0403554	0.837603
Bcin06g02130.1	0.279289	2.02e-05			0.312303	0.0194406	0.229788	0.0604332	0.149525	0.357002
Bcin09g03810.2	0.279197	2.03e-05	dienelactone hydrolase family	F:hydrolase activity	0.34532	0.00854158	0.310553	0.0101579	0.205562	0.183606
Bcin08g02620.1	0.279196	2.03e-05			0.10548	0.519743	0.298874	0.0136385	0.037344	0.850389
Bcin15g00050.1	0.279087	2.05e-05	trichothecene 3-o-acetyltransferase [Botrytis cinerea 1]	F:transferase activity, transferring acyl groups other than amino-acyl groups	0.216251	0.128888	0.32911	0.00650848	0.139392	0.393665
Bcin11g02720.1	0.279081	2.05e-05	alcohol dehydrogenase [Botrytis cinerea ]	F:oxidoreductase activity; P:oxidation-reduction process	0.235974	0.0918271	0.229327	0.0610411	0.0610825	0.741758
Bcin04g01390.1	0.278975	2.06e-05			0.207135	0.148986	0.32131	0.0078236	0.0847124	0.630734
Bcin03g06510.1	0.278773	2.1e-05			0.230751	0.100748	0.344194	0.00436718	0.242933	0.107123
Bcin06g01620.1	0.278714	2.1e-05			0.230331	0.101533	0.314121	0.00932852	0.257244	0.0824359
Bcin08g00440.1	0.278663	2.11e-05			0.382678	0.00305822	0.416942	0.000492224	0.347572	0.0132185
Bcin15g03890.1	0.278575	2.13e-05			0.0244438	0.906898	0.370971	0.00205203	0.11404	0.498364
Bcin05g03730.1	0.278211	2.19e-05			0.0657081	0.717652	0.362832	0.00263034	0.200692	0.195722
Bcin15g04480.1	0.278167	2.2e-05			0.494072	6.30357e-05	0.511951	1.25627e-05	0.460716	0.000403388
Bcin02g02160.1	0.278139	2.2e-05			0.358085	0.00630186	0.146568	0.243108	0.296487	0.0412778
Bcin14g04080.1	0.277868	2.25e-05			0.287819	0.0334997	0.417878	0.000476077	0.362168	0.00895073
Bcin12g04150.1	0.277775	2.27e-05			0.202903	0.15847	0.211001	0.0857415	0.154029	0.340732
Bcin03g04760.1	0.277717	2.27e-05			0.241441	0.083344	0.286408	0.0181094	0.283383	0.0529781
Bcin03g08070.1	0.277642	2.28e-05			0.241753	0.0827249	0.466888	9.07338e-05	0.234346	0.122169
Bcin03g01970.1	0.277625	2.28e-05			0.266739	0.0511716	0.310581	0.0101579	0.249674	0.0941754
Bcin09g05010.1	0.277625	2.28e-05	hypothetical protein BC1G_09860	no GO terms	0.49026	7.35805e-05	0.202116	0.100179	0.311829	0.0302027
Bcin11g04090.1	0.277602	2.28e-05			0.409672	0.00137986	0.346378	0.00411908	0.286937	0.0496793
Bcin02g05980.1	0.277433	2.31e-05			0.181538	0.217716	0.265803	0.0287876	0.309957	0.0314221
Bcin08g02330.1	0.277423	2.31e-05			0.318896	0.0165206	0.201139	0.101959	0.0898399	0.605557
Bcin13g01310.1	0.277379	2.32e-05			0.145496	0.343373	0.228554	0.0619289	0.296053	0.041656
Bcin01g03220.1	0.277174	2.36e-05			0.0681769	0.705377	0.362263	0.002671	0.248738	0.0959844
Bcin01g11010.1	0.276993	2.39e-05			0.183858	0.21071	0.151451	0.226896	0.116034	0.48986
Bcin02g06650.1	0.276975	2.39e-05	hypothetical protein SS1G_10974 [Sclerotinia sclerotiorum 1980]	C:box H/ACA snoRNP complex; C:nucleus; P:pseudouridine synthesis; P:ribosome biogenesis; C:nucleolus	0.0617065	0.736122	0.297179	0.0141635	0.239135	0.113845
Bcin03g05420.1	0.276965	2.39e-05			0.214596	0.132074	0.371907	0.00200729	0.275421	0.0609941
Bcin03g02230.1	0.276549	2.47e-05	DUF185 domain	no GO terms	0.182759	0.214105	0.152333	0.223974	0.160784	0.317283
Bcin03g06170.1	0.276467	2.49e-05	40S ribosomal S1 [Botrytis cinerea ]	F:structural constituent of ribosome; C:intracellular ribonucleoprotein complex; C:cytoplasm; C:cytosolic small ribosomal subunit; C:ribosome; C:intracellular; P:translation	0.098318	0.55619	0.311923	0.00986937	0.14551	0.372602
Bcin08g00160.1	0.276425	2.49e-05			0.341902	0.0093665	0.133356	0.290687	0.276736	0.0598191
Bcin01g05490.1	0.276369	2.5e-05			0.278432	0.0406447	0.259156	0.0331663	0.23242	0.125287
Bcin11g01640.1	0.276231	2.53e-05			0.220971	0.119226	0.201479	0.101383	-0.0406267	0.836674
Bcin03g05340.1	0.276171	2.54e-05			0.0265871	0.898518	0.268353	0.0272891	0.28181	0.0546737
Bcin11g01690.1	0.276129	2.55e-05	acetate kinase	F:magnesium ion binding; P:organic acid metabolic process; F:ATP binding; P:acetyl-CoA biosynthetic process; P:phosphorylation; C:intracellular; F:acetate kinase activity	0.532854	9.89425e-06	0.267743	0.0276344	0.385621	0.00477646
Bcin15g03480.1	0.276042	2.56e-05			0.126248	0.425439	0.0992132	0.439803	0.0429734	0.826812
Bcin01g07840.1	0.275854	2.6e-05			0.199851	0.166133	0.334075	0.00567048	0.387873	0.00448384
Bcin07g04200.1	0.275838	2.6e-05			0.384902	0.00292182	0.428595	0.000328924	0.280969	0.0554682
Bcin12g00630.1	0.275803	2.61e-05			0.17108	0.250591	0.423033	0.00039932	0.166698	0.296714
Bcin04g00450.1	0.275794	2.61e-05			0.386394	0.0028145	0.214067	0.0811175	0.123413	0.460624
Bcin06g01590.1	0.275733	2.61e-05			0.299851	0.0258763	0.31035	0.0101982	0.474579	0.000229997
Bcin10g03880.1	0.275719	2.61e-05			0.11172	0.489248	0.0853228	0.509952	0.01328	0.953331
Bcin11g02060.1	0.275712	2.61e-05			0.440545	0.000459086	0.323372	0.00747615	0.284333	0.052003
Bcin02g09280.1	0.275584	2.64e-05	cfia complex component [Botrytis cinerea 1]	C:nucleus; P:RNA processing; P:mRNA processing	0.206091	0.151202	0.154097	0.218515	-0.0130629	0.9539
Bcin10g04610.1	0.275514	2.65e-05	40S ribosomal S7 [Botrytis cinerea ]	F:structural constituent of ribosome; C:ribosome; P:translation	0.115138	0.473859	0.355657	0.00321323	0.168638	0.29037
Bcin04g06790.1	0.275388	2.68e-05			0.236883	0.0904507	0.289555	0.0168597	0.0652876	0.72098
Bcin08g05630.1	0.275256	2.71e-05			0.367743	0.00484151	0.200326	0.103306	0.184319	0.242542
Bcin11g05650.1	0.275161	2.73e-05			0.169371	0.255885	0.366413	0.00237628	0.13927	0.393855
Bcin06g03350.1	0.275102	2.74e-05	60S ribosomal L13 [Botrytis cinerea ]	F:structural constituent of ribosome; C:ribosome; C:intracellular; P:translation	0.088185	0.605929	0.392336	0.00110076	0.231823	0.126512
Bcin12g02880.1	0.275017	2.75e-05			0.23223	0.0979565	0.32188	0.00771899	0.158546	0.325137
Bcin06g05270.1	0.274838	2.79e-05			0.27268	0.0459437	0.410336	0.000608636	0.227876	0.134706
Bcin16g01910.1	0.274676	2.83e-05			0.304639	0.0231705	0.253161	0.0376312	0.277754	0.0589499
Bcin10g03500.1	0.274331	2.91e-05	phosphatidylserine decarboxylase proenzyme [Botrytis cinerea T4]	C:integral component of membrane; F:phosphatidylserine decarboxylase activity; P:phospholipid biosynthetic process	0.312046	0.0195852	0.101031	0.43038	0.0783234	0.662051
Bcin02g06820.1	0.274288	2.91e-05	dihydrolipoyllysine-residue succinyltransferase component of 2-oxoglutarate dehydrogenase complex [Botrytis cinerea T4]	F:dihydrolipoyllysine-residue succinyltransferase activity; F:transferase activity, transferring acyl groups; C:oxoglutarate dehydrogenase complex; P:metabolic process; P:tricarboxylic acid cycle; F:transferase activity	0.145673	0.342588	0.320388	0.00798338	-0.0100787	0.96542
Bcin05g01080.1	0.274288	2.91e-05			0.349824	0.00772587	0.417865	0.000476077	0.234536	0.122169
Bcin05g01420.1	0.274255	2.92e-05			0.430562	0.000625791	0.145103	0.248123	0.108559	0.5218
Bcin07g02280.1	0.274181	2.93e-05			0.210947	0.139842	0.460065	0.000117018	0.136978	0.40334
Bcin13g04680.1	0.274115	2.94e-05			0.429286	0.00066356	0.259604	0.0328473	0.270225	0.0673823
Bcin01g07760.1	0.274079	2.95e-05	aldo-keto reductase [Botrytis cinerea T4]	no GO terms	0.458871	0.000245673	0.539135	3.77092e-06	0.39631	0.00364823
Bcin03g05290.1	0.273961	2.98e-05			0.264704	0.0533256	0.283058	0.0196022	0.261964	0.0769953
Bcin16g03570.1	0.273895	2.99e-05	Bcnrps3		0.324145	0.014535	0.211517	0.0850204	0.203771	0.188175
Bcin13g03500.1	0.273863	2.99e-05			0.235499	0.0926387	0.281823	0.0201196	0.237765	0.115801
Bcin03g02680.1	0.27379	3.01e-05	eukaryotic peptide chain release factor subunit 1	P:translational termination; P:L-phenylalanine biosynthetic process; C:cytoplasm; P:metabolic process; F:amino acid binding; F:prephenate dehydratase activity; F:translation release factor activity, codon specific	0.287154	0.0338069	0.357705	0.00301024	0.195035	0.211674
Bcin01g02320.1	0.273677	3.04e-05			0.400543	0.00181421	0.414867	0.000533301	0.410106	0.0023081
Bcin04g05050.3	0.273559	3.06e-05			0.315098	0.0180324	0.121324	0.338269	0.0451709	0.817661
Bcin03g07640.1	0.273308	3.13e-05			0.319126	0.0164385	0.259346	0.0330496	0.108234	0.523294
Bcin06g00060.1	0.273276	3.13e-05			0.240762	0.0843818	0.272789	0.0247269	0.101777	0.552693
Bcin06g00400.1	0.273229	3.14e-05			0.346514	0.00835087	0.269493	0.0265813	0.373711	0.0066089
Bcin03g03360.1	0.273138	3.16e-05	transaldolase [Botrytis cinerea T4]	P:carbohydrate metabolic process; F:sedoheptulose-7-phosphate:D-glyceraldehyde-3-phosphate glyceronetransferase activity; C:cytoplasm; P:pentose-phosphate shunt; F:catalytic activity; F:transferase activity	0.398521	0.00193477	0.269479	0.0265827	0.108505	0.521931
Bcin02g02530.1	0.273043	3.18e-05			0.201723	0.161223	0.354924	0.00328457	0.173318	0.275547
Bcin09g06470.1	0.273002	3.19e-05			0.140328	0.364905	0.519628	9.05492e-06	0.0463646	0.812922
Bcin06g02390.1	0.272994	3.19e-05			0.141101	0.360792	0.36876	0.0022132	0.160743	0.317283
Bcin08g04150.1	0.272883	3.21e-05			0.224376	0.112763	0.29924	0.0134991	0.219154	0.153013
Bcin01g02750.1	0.272878	3.21e-05			0.117051	0.464801	0.275909	0.023057	0.175217	0.269092
Bcin07g06370.1	0.272798	3.23e-05			0.355969	0.00661049	0.262046	0.031222	0.0389175	0.843923
Bcin07g00120.1	0.272759	3.24e-05			0.209807	0.142584	0.199064	0.105591	0.0629544	0.732947
Bcin09g05020.1	0.272423	3.33e-05	glutamate decarboxylase [Botrytis cinerea 1]	F:pyridoxal phosphate binding; P:glutamate metabolic process; F:catalytic activity; F:glutamate decarboxylase activity; P:carboxylic acid metabolic process; F:carboxy-lyase activity	0.324349	0.014446	0.139989	0.26584	0.0670239	0.712501
Bcin04g01640.1	0.272412	3.33e-05	carbohydrate-binding module family 48	no GO terms	0.346446	0.00835549	0.0597667	0.654158	-0.0868285	0.620371
Bcin06g07230.1	0.272313	3.35e-05			0.169262	0.256166	0.132325	0.294767	0.0927835	0.592058
Bcin12g06580.1	0.272152	3.4e-05			0.0374254	0.85252	0.567621	8.12211e-07	0.252523	0.0898105
Bcin16g02700.1	0.272047	3.42e-05			0.248535	0.0720553	0.36602	0.00240097	0.116278	0.488657
Bcin09g03930.1	0.272002	3.43e-05			0.250855	0.0688166	0.175353	0.157349	-0.0654368	0.72011
Bcin03g02130.1	0.271999	3.43e-05			0.37968	0.00335381	0.226546	0.064262	0.332461	0.0193598
Bcin05g07310.1	0.271972	3.43e-05			0.311571	0.019807	0.321365	0.00781294	0.252618	0.0896918
Bcin02g02630.1	0.271963	3.43e-05	dynamin dnm1	F:GTP binding; F:GTPase activity	0.0384292	0.848015	0.287968	0.0174671	-0.0691671	0.70241
Bcin03g07400.1	0.271951	3.43e-05			0.422355	0.00086417	0.381782	0.00149611	0.334143	0.0187035
Bcin04g00380.1	0.27195	3.43e-05			0.132949	0.396778	0.344927	0.00427468	0.257963	0.0818818
Bcin05g04650.1	0.271846	3.45e-05			-0.0350922	0.863518	0.389867	0.00118906	0.23162	0.126889
Bcin04g02230.1	0.271832	3.45e-05			0.0703473	0.694327	0.301153	0.0128748	0.167363	0.294568
Bcin01g08990.1	0.271561	3.53e-05			0.20388	0.156578	0.279802	0.0211204	0.132895	0.420889
Bcin15g03600.1	0.271537	3.53e-05			0.249742	0.0702993	0.218326	0.0752219	0.139216	0.39395
Bcin04g05880.1	0.271186	3.63e-05			0.0654775	0.718697	0.261856	0.0313326	0.410947	0.00227701
Bcin01g06060.1	0.271032	3.67e-05			0.325109	0.0141557	0.282569	0.0197793	0.411612	0.0022216
Bcin02g03540.1	0.271027	3.67e-05	40S ribosomal S15 [Botrytis cinerea ]	F:RNA binding; F:structural constituent of ribosome; C:intracellular ribonucleoprotein complex; C:small ribosomal subunit; C:ribosome; P:translation	0.145171	0.34445	0.352794	0.00347121	0.085255	0.628502
Bcin04g03030.1	0.270933	3.7e-05	eukaryotic translation initiation factor 3 [Botrytis cinerea ]	F:translation initiation factor activity; P:formation of translation preinitiation complex; C:cytoplasm; C:eukaryotic 43S preinitiation complex; C:eukaryotic 48S preinitiation complex; P:translational initiation; P:regulation of translational initiation; C:eukaryotic translation initiation factor 3 complex; P:translation	0.0726533	0.683087	0.301899	0.0126292	0.0586272	0.754361
Bcin02g01790.1	0.27078	3.74e-05	tubulin alpha chain [Botrytis cinerea T4]	F:nucleotide binding; F:GTP binding; C:cytoskeleton; C:cytoplasm; F:GTPase activity; F:structural constituent of cytoskeleton; C:microtubule; P:microtubule-based process	0.235499	0.0926387	0.329409	0.00646945	0.0725448	0.687711
Bcin06g07020.1	0.270733	3.75e-05			0.21952	0.122085	0.318964	0.00824055	0.296636	0.0411817
Bcin05g02680.1	0.270639	3.78e-05			0.155657	0.303129	0.356715	0.00310466	0.062968	0.732936
Bcin03g04860.1	0.27062	3.78e-05			0.0542051	0.771826	0.473738	6.90785e-05	0.312425	0.0297544
Bcin16g03970.1	0.270567	3.79e-05			0.26328	0.0548378	0.36853	0.00222774	0.266848	0.071808
Bcin03g04630.1	0.270555	3.79e-05			0.159305	0.289853	0.541441	3.38951e-06	0.178785	0.257539
Bcin11g05530.1	0.27051	3.8e-05			0.145022	0.345147	0.217851	0.0758321	-0.0104314	0.964539
Bcin15g00430.1	0.2705	3.8e-05	NACHT and Ankyrin domain [Botrytis cinerea T4]	F:protein binding	0.34452	0.00874206	0.13965	0.267144	0.040369	0.837595
Bcin01g10700.1	0.270357	3.84e-05			0.298684	0.0264798	0.203486	0.0979817	0.162249	0.312564
Bcin02g08550.2	0.270319	3.85e-05			0.360838	0.00592109	0.405114	0.000712745	0.339107	0.0166092
Bcin01g03440.1	0.270287	3.86e-05	valyl-trna synthetase	F:nucleotide binding; F:valine-tRNA ligase activity; P:tRNA aminoacylation for protein translation; F:ATP binding; F:aminoacyl-tRNA ligase activity; P:valyl-tRNA aminoacylation; P:regulation of translational fidelity; F:aminoacyl-tRNA editing activity; F:ligase activity; P:translation	0.046541	0.809759	0.326085	0.00699994	-0.107922	0.524683
Bcin02g01870.1	0.270077	3.92e-05	NADH-dependent flavin oxidoreductase [Botrytis cinerea T4]	F:FMN binding; F:oxidoreductase activity; F:catalytic activity; P:oxidation-reduction process	0.384658	0.00294527	0.316997	0.00865886	0.309305	0.0317344
Bcin04g02130.1	0.270049	3.93e-05			0.00895279	0.970335	0.212222	0.0838575	0.116983	0.485366
Bcin13g04270.1	0.269936	3.96e-05			0.0856213	0.617613	0.224566	0.066523	0.199349	0.199107
Bcin04g00530.1	0.269924	3.96e-05			0.179544	0.223561	0.413212	0.000562241	0.181118	0.251029
Bcin01g04240.1	0.269717	4.03e-05	hypothetical protein BC1G_12228 [Botrytis cinerea B05.10]	C:membrane; C:integral component of membrane	0.402021	0.00171046	0.312249	0.00980446	0.380589	0.00549554
Bcin03g03170.1	0.269699	4.03e-05			0.264582	0.0534517	0.19863	0.106511	0.111734	0.508929
Bcin01g05770.1	0.269648	4.04e-05	hypothetical protein BC1G_00442	P:metabolic process; F:hydrolase activity	0.340003	0.00986511	0.381538	0.00150925	0.392729	0.00400959
Bcin14g01300.1	0.269638	4.04e-05			0.180372	0.220654	0.199661	0.104514	-0.0148806	0.947464
Bcin05g01010.1	0.269523	4.07e-05			0.262235	0.0559265	0.378269	0.00167905	0.129232	0.435931
Bcin05g01120.2	0.269509	4.07e-05	dienelactone hydrolase family	F:hydrolase activity	0.100909	0.542521	0.172151	0.165712	-0.00902062	0.969464
Bcin07g02070.1	0.269407	4.11e-05			0.192078	0.188006	0.108668	0.394403	0.038185	0.846418
Bcin10g05410.1	0.269372	4.11e-05	phenylalanyl-tRNA synthetase beta chain [Botrytis cinerea T4]	F:magnesium ion binding; F:ATP binding; F:RNA binding; C:cytoplasm; F:phenylalanine-tRNA ligase activity; P:phenylalanyl-tRNA aminoacylation	-0.0259902	0.900877	0.281701	0.0201571	0.0565654	0.764707
Bcin05g06330.1	0.269322	4.13e-05			0.291793	0.0308495	0.333424	0.00577487	0.222694	0.145503
Bcin08g05780.1	0.269302	4.13e-05	hypothetical protein BC1G_08963	P:metabolic process; F:hydrolase activity	0.356308	0.00656889	0.18067	0.144582	0.0636327	0.729609
Bcin10g01400.1	0.269255	4.13e-05			0.0046663	0.98478	0.32736	0.00678784	0.260065	0.079277
Bcin02g08150.1	0.269249	4.13e-05			0.262507	0.0556525	0.16583	0.183563	0.223725	0.142828
Bcin11g03150.1	0.269248	4.13e-05			0.203581	0.157208	0.328405	0.00662003	0.0244574	0.905153
Bcin06g01300.1	0.26924	4.13e-05			0.164433	0.272184	0.51484	1.10469e-05	0.372626	0.00676826
Bcin16g04720.1	0.269187	4.14e-05			0.218774	0.123586	0.511177	1.30747e-05	0.420524	0.00168477
Bcin02g08690.1	0.269127	4.16e-05	26S protease regulatory subunit 6b [Botrytis cinerea T4]	F:nucleotide binding; F:ATP binding; C:cytoplasm; P:protein catabolic process; P:proteolysis; F:peptidase activity; F:hydrolase activity	0.212493	0.136361	0.228405	0.0621131	0.115491	0.491501
Bcin02g07210.1	0.26882	4.27e-05	aldose 1-epimerase	P:carbohydrate metabolic process; F:catalytic activity; F:carbohydrate binding; F:isomerase activity	0.166766	0.264365	0.260716	0.0320997	0.120008	0.47413
Bcin14g01840.1	0.268807	4.27e-05			0.105765	0.518191	0.220686	0.071736	0.275353	0.0609941
Bcin04g05670.1	0.26874	4.29e-05			0.0837493	0.6263	0.32698	0.0068568	0.135214	0.411018
Bcin07g00010.1	0.268613	4.33e-05			0.443041	0.000433981	0.362371	0.00266908	0.456023	0.000484808
Bcin09g03990.1	0.268528	4.35e-05			0.402577	0.00167741	0.395429	0.000987864	0.214786	0.162367
Bcin07g01580.1	0.268471	4.37e-05	nucleolar GTP-binding [Botrytis cinerea T4]	F:GTP binding; P:ribosome biogenesis; C:nucleolus	0.0900977	0.597602	0.276791	0.0226109	0.279436	0.0571766
Bcin11g05570.1	0.268392	4.39e-05			0.154029	0.308974	0.384021	0.00140563	0.194357	0.213496
Bcin10g01890.1	0.268339	4.41e-05			0.281091	0.038487	0.405982	0.000692323	0.241685	0.109863
Bcin12g06560.1	0.268311	4.41e-05			0.285228	0.0351057	0.340315	0.00480658	0.406226	0.00266263
Bcin08g05250.1	0.267997	4.53e-05			0.0586272	0.750721	0.236517	0.0530047	0.328351	0.0211709
Bcin14g03500.1	0.267964	4.54e-05	eukaryotic translation initiation factor 2 subunit beta [Botrytis cinerea T4]	F:translation initiation factor activity; P:translational initiation	0.0186381	0.930515	0.288673	0.0172557	0.0127103	0.954587
Bcin01g05550.1	0.267878	4.56e-05			0.202727	0.15879	0.408993	0.000634038	0.312453	0.0297544
Bcin10g03820.1	0.267675	4.63e-05	eukaryotic translation initiation factor 3 subunit a	F:translation initiation factor activity; P:formation of translation preinitiation complex; C:eukaryotic 43S preinitiation complex; C:eukaryotic 48S preinitiation complex; P:regulation of translational initiation; C:eukaryotic translation initiation factor 3 complex	0.157664	0.295199	0.304856	0.0117879	0.241332	0.110625
Bcin04g04130.1	0.267633	4.64e-05			0.124091	0.434098	0.245361	0.044269	0.151194	0.351689
Bcin02g01920.1	0.267591	4.66e-05			0.146677	0.338005	0.16815	0.176593	-0.0244303	0.905163
Bcin11g03320.1	0.267548	4.67e-05			0.0248779	0.905653	0.359428	0.00286396	0.136774	0.403634
Bcin13g03450.1	0.267396	4.72e-05			0.385323	0.00290244	0.283152	0.0195904	0.28672	0.0497546
Bcin12g06020.1	0.267293	4.76e-05			0.34981	0.00772587	0.389243	0.00120635	0.320171	0.0250361
Bcin02g07000.1	0.267276	4.76e-05			0.347328	0.00821483	0.259251	0.0330971	0.244778	0.103516
Bcin05g02250.1	0.267237	4.77e-05			0.0052089	0.983426	0.28322	0.0195643	0.207773	0.178601
Bcin01g00640.1	0.2672	4.78e-05			0.239962	0.0855445	0.403161	0.000764423	0.396161	0.00365098
Bcin11g00750.1	0.26706	4.83e-05			0.239243	0.0867879	0.210662	0.0862834	0.153907	0.341238
Bcin12g00220.1	0.267006	4.85e-05	pyruvate dehydrogenase dihydrolipoamide acetyltransferase component [Botrytis cinerea 1]	C:integral component of membrane; F:transferase activity	0.305521	0.022792	0.16834	0.176047	-0.0242946	0.905647
Bcin12g04430.1	0.266787	4.93e-05			0.268855	0.0490654	0.199797	0.104255	0.178378	0.258635
Bcin01g00420.1	0.266756	4.94e-05	plasma membrane stress response (Ist2) [Botrytis cinerea T4]	C:membrane; C:integral component of membrane	0.319696	0.0162744	0.281118	0.0204156	0.234523	0.122169
Bcin02g03290.1	0.26664	4.98e-05			0.351601	0.00741234	0.396772	0.00094593	0.212656	0.167161
Bcin03g00590.1	0.266523	5.02e-05	40S ribosomal S5	F:RNA binding; F:structural constituent of ribosome; C:intracellular ribonucleoprotein complex; C:cytosolic small ribosomal subunit; F:mRNA binding; C:small ribosomal subunit; P:ribosomal small subunit assembly; C:ribosome; F:rRNA binding; P:translation	0.108071	0.507152	0.364107	0.00254122	0.166698	0.296714
Bcin11g05660.1	0.266515	5.02e-05			-0.00379816	0.98772	0.34532	0.00423576	0.322857	0.0236776
Bcin14g04520.1	0.266496	5.03e-05			0.201506	0.161752	0.288511	0.0173097	0.0825963	0.640267
Bcin11g02430.1	0.266478	5.03e-05			0.373318	0.00407869	0.0840206	0.517438	0.0164948	0.941753
Bcin10g00770.1	0.266466	5.03e-05			0.271663	0.0467673	0.502482	1.9598e-05	0.234509	0.122169
Bcin01g02880.1	0.266451	5.03e-05			0.255901	0.0632657	0.439636	0.000235166	0.235052	0.121679
Bcin07g04180.1	0.266431	5.03e-05			0.00766413	0.974775	0.158681	0.204904	0.196337	0.207663
Bcin08g02940.1	0.266428	5.03e-05			0.116902	0.465545	0.383017	0.00143787	0.39395	0.00388223
Bcin07g07110.1	0.266258	5.09e-05			0.314365	0.0183739	0.353974	0.00335913	0.181389	0.250303
Bcin01g02500.1	0.266111	5.15e-05			-0.0108112	0.964307	0.222748	0.0689891	-0.0106213	0.963659
Bcin02g07550.1	0.265821	5.27e-05	cbs pb1 domain-containing	F:protein binding; F:catalytic activity	0.116278	0.468556	0.262493	0.03092	-0.131294	0.428577
Bcin14g02030.1	0.265796	5.28e-05			0.359523	0.0060667	0.25274	0.0379741	0.327794	0.0214339
Bcin09g05650.1	0.265725	5.3e-05			0.395008	0.00217697	0.579924	2.02794e-07	0.426302	0.00136723
Bcin03g07020.1	0.265705	5.31e-05			0.320998	0.0156846	0.25974	0.0327723	0.0872626	0.617949
Bcin09g06830.2	0.265696	5.31e-05			0.0331796	0.872919	0.159007	0.203942	0.141739	0.384736
Bcin08g05930.1	0.265405	5.43e-05			0.107054	0.51278	0.116753	0.357389	0.0830846	0.637986
Bcin02g09190.1	0.265299	5.47e-05			0.403812	0.00161151	0.186883	0.130234	0.120402	0.472604
Bcin02g05950.1	0.26526	5.48e-05			0.176818	0.232011	0.2258	0.0651283	0.0753663	0.675696
Bcin13g03110.1	0.26513	5.54e-05	-like family domain-containing [Botrytis cinerea T4]	no GO terms	0.567906	1.43217e-06	0.405182	0.000711631	0.546894	6.24354e-06
Bcin08g06620.1	0.265033	5.58e-05			0.213009	0.135301	0.133831	0.288864	0.0997287	0.5611
Bcin12g06130.1	0.265001	5.59e-05			0.335228	0.0111015	0.371175	0.0020368	0.224145	0.142334
Bcin07g00150.1	0.264842	5.66e-05			0.24863	0.0719302	0.279124	0.021445	0.328147	0.0212442
Bcin09g06420.1	0.264731	5.7e-05			0.316956	0.017326	0.297043	0.0141886	-0.0134292	0.95277
Bcin01g05490.2	0.264726	5.7e-05			0.382474	0.00306251	0.173806	0.16131	0.248888	0.0956541
Bcin01g02630.2	0.264528	5.79e-05			0.252157	0.067446	0.221717	0.0702717	0.175922	0.266651
Bcin16g02100.1	0.264394	5.85e-05			0.177279	0.230452	0.208939	0.0891134	0.165206	0.302034
Bcin05g07570.1	0.2643	5.89e-05			0.0900434	0.59775	0.401099	0.000818344	0.128717	0.437885
Bcin04g06450.1	0.26412	5.97e-05			0.0855263	0.617975	0.454463	0.000142665	0.116603	0.486724
Bcin01g01970.1	0.264098	5.97e-05			0.138497	0.372661	0.44357	0.000206733	0.235852	0.119672
Bcin02g06130.1	0.264012	6.01e-05			0.195144	0.17992	0.203473	0.0979908	0.186001	0.238127
Bcin02g06580.1	0.26369	6.17e-05			0.42325	0.000838155	0.261205	0.0318155	0.211517	0.16984
Bcin08g02950.1	0.263641	6.18e-05	D-arabinitol dehydrogenase [Botrytis cinerea T4]	F:oxidoreductase activity; P:oxidation-reduction process	0.331036	0.0121752	0.235784	0.0537323	0.0863945	0.622693
Bcin10g05840.1	0.263578	6.21e-05	mfs multidrug	P:transmembrane transport; C:membrane; C:integral component of membrane	0.208966	0.144602	0.226668	0.0641445	0.324295	0.0232291
Bcin02g06140.1	0.263384	6.31e-05			0.0711612	0.690464	0.117485	0.354186	0.119954	0.474448
Bcin03g01920.1	0.263319	6.33e-05			0.403405	0.00163644	0.191047	0.121319	0.254476	0.086425
Bcin04g02960.1	0.26327	6.35e-05			0.223467	0.114553	0.354164	0.00334907	0.208709	0.176542
Bcin05g00540.1	0.263212	6.38e-05			0.367946	0.00482117	0.304463	0.0118774	0.220903	0.148987
Bcin01g04950.1	0.263196	6.38e-05			0.0166712	0.937904	0.327889	0.00670709	0.312398	0.0297544
Bcin01g07320.1	0.263063	6.44e-05			0.2906	0.0316555	0.206715	0.0924398	0.0648399	0.723485
Bcin01g07490.1	0.262801	6.56e-05			-0.0107705	0.964417	0.275393	0.0233622	0.0724362	0.687992
Bcin06g06600.1	0.262791	6.56e-05			0.0778351	0.657044	0.412859	0.000565107	0.0700217	0.6984
Bcin13g00010.1	0.262781	6.56e-05	hypothetical protein BC1G_15526	F:iron ion binding; F:oxidoreductase activity, acting on paired donors, with incorporation or reduction of molecular oxygen; P:oxidation-reduction process; F:monooxygenase activity; F:heme binding	0.501574	4.47154e-05	0.42892	0.000325111	0.471351	0.000261968
Bcin04g00980.1	0.262763	6.56e-05			0.302645	0.0242722	0.253296	0.0375223	0.311096	0.030586
Bcin04g04790.1	0.262746	6.56e-05			0.0570673	0.759151	0.517594	9.91207e-06	0.193421	0.216162
Bcin12g04180.1	0.262577	6.65e-05			0.396134	0.00210799	0.288402	0.0173338	0.223806	0.142828
Bcin08g01710.1	0.262396	6.74e-05			0.317634	0.0170466	0.254693	0.036372	0.153893	0.341238
Bcin08g05410.1	0.2623	6.79e-05	dshct domain-containing [Botrytis cinerea 1]	F:ATP binding; F:RNA binding; F:RNA helicase activity; P:RNA catabolic process	0.061503	0.737037	0.229531	0.0607685	0.0218665	0.916909
Bcin07g04390.1	0.262155	6.86e-05			0.263294	0.0548378	0.179843	0.146717	0.139447	0.393571
Bcin13g03320.1	0.26203	6.93e-05			0.0550461	0.767731	0.140206	0.265119	0.19863	0.201177
Bcin07g02570.1	0.261991	6.94e-05			0.334265	0.0113131	0.0596989	0.654511	0.278608	0.0580606
Bcin03g04740.1	0.26198	6.94e-05			0.136096	0.381797	0.471215	7.54179e-05	0.198169	0.202421
Bcin09g06410.1	0.261921	6.97e-05			0.32561	0.0140172	0.296161	0.0145011	0.188239	0.231487
Bcin01g00260.1	0.261876	6.99e-05			-0.0502577	0.791732	0.37576	0.00180073	0.217119	0.156598
Bcin07g04230.1	0.261848	7e-05			0.353785	0.0069852	0.205779	0.0940819	0.301696	0.0371196
Bcin11g04800.1	0.261766	7.04e-05			0.315844	0.0176904	0.217621	0.0761729	0.164542	0.304504
Bcin04g01770.1	0.261746	7.04e-05			0.142553	0.354814	0.270686	0.0259403	0.23885	0.114134
Bcin09g01290.1	0.261688	7.06e-05			0.356498	0.00655394	0.21602	0.0783765	0.112222	0.507571
Bcin09g05760.1	0.261687	7.06e-05			0.17869	0.226227	0.344859	0.00428264	-0.00378459	0.986094
Bcin11g03010.1	0.261499	7.16e-05			0.114921	0.474477	0.330982	0.00620073	0.234075	0.122705
Bcin05g00660.1	0.261436	7.19e-05			0.336001	0.0108917	0.41659	0.000497773	0.208492	0.176799
Bcin07g06570.1	0.261423	7.19e-05			0.0100651	0.966728	0.372368	0.00198509	0.112235	0.507564
Bcin08g03660.1	0.261323	7.25e-05			0.297979	0.0268898	0.154463	0.217494	0.331511	0.0196654
Bcin02g00440.1	0.261131	7.35e-05			0.187887	0.199163	0.197843	0.107886	0.111625	0.509093
Bcin12g06550.1	0.261114	7.36e-05			0.0819316	0.635583	0.530453	5.52035e-06	0.105304	0.536957
Bcin14g00170.1	0.261015	7.41e-05			0.133966	0.39173	0.242512	0.0470618	0.35373	0.0112812
Bcin01g10290.1	0.260788	7.53e-05			0.0394737	0.842602	0.0816739	0.529962	0.21035	0.17225
Bcin10g02830.1	0.260679	7.59e-05			0.278717	0.0404034	0.496907	2.52636e-05	0.403866	0.00286485
Bcin02g06250.1	0.260572	7.65e-05			0.227333	0.107048	0.381158	0.00152171	0.221717	0.147352
Bcin02g00990.1	0.260557	7.65e-05			0.112615	0.484397	0.457094	0.000129065	0.286679	0.0497629
Bcin12g06160.1	0.260532	7.66e-05	hypothetical protein BcDW1_488	no GO terms	0.0786489	0.652804	-0.00642973	0.963878	0.0238877	0.907423
Bcin12g01270.1	0.260396	7.74e-05			0.388388	0.00266157	0.301723	0.0126919	0.393855	0.00388223
Bcin08g03690.1	0.260275	7.81e-05			0.158885	0.291486	0.135445	0.282775	0.150909	0.352441
Bcin08g06860.1	0.260095	7.92e-05			0.250651	0.0690363	0.374769	0.00185339	0.204042	0.187394
Bcin06g04560.1	0.259915	8.03e-05			0.201763	0.161178	0.417241	0.000486173	0.292892	0.0440958
Bcin03g04780.1	0.259812	8.09e-05			0.136666	0.379342	0.404639	0.000726231	0.112697	0.504824
Bcin02g01090.1	0.259771	8.11e-05			0.120917	0.447488	0.326397	0.0069481	0.272206	0.0649103
Bcin05g01590.1	0.259668	8.17e-05			0.169425	0.255744	0.379775	0.001598	0.0713104	0.693177
Bcin04g03220.1	0.259537	8.25e-05			0.32774	0.0132762	0.363904	0.00255373	0.368136	0.00763374
Bcin15g00160.1	0.259516	8.25e-05			0.473508	0.000133907	0.432013	0.000300116	0.42401	0.00151696
Bcin09g02170.1	0.259491	8.26e-05			-0.00785404	0.974344	0.268584	0.0271402	0.164148	0.306164
Bcin02g08770.1	0.259476	8.26e-05			0.365396	0.00522009	0.248264	0.0416448	0.25784	0.0819468
Bcin06g07430.1	0.259447	8.27e-05	hypothetical protein BC1G_14237	no GO terms	0.338836	0.0101502	0.182216	0.141188	0.0273332	0.892942
Bcin11g01310.1	0.25939	8.3e-05	hypothetical protein BC1G_03976	no GO terms	0.513185	2.60227e-05	0.45213	0.000156395	0.301763	0.0371196
Bcin12g05550.1	0.259251	8.39e-05			0.183736	0.210936	0.497056	2.52161e-05	0.261408	0.0774895
Bcin08g04250.1	0.259192	8.42e-05			0.244221	0.0791238	0.240844	0.0486463	0.212059	0.168979
Bcin04g03400.1	0.259189	8.42e-05			0.000827455	0.997629	0.425936	0.000359798	0.225692	0.139249
Bcin15g03200.1	0.258946	8.58e-05			0.317214	0.0172442	0.414596	0.000537237	0.311544	0.0304054
Bcin10g03190.1	0.258784	8.68e-05			0.10567	0.518733	0.340016	0.00484752	0.280399	0.0561882
Bcin12g05330.1	0.258529	8.86e-05			0.268055	0.0499305	0.289528	0.0168606	0.0656674	0.718959
Bcin14g00290.1	0.25807	9.18e-05			0.134021	0.391533	0.258519	0.0335846	0.120062	0.473912
Bcin05g01550.1	0.25804	9.2e-05			0.0309007	0.881224	0.255765	0.0356429	0.150231	0.354955
Bcin13g04860.1	0.257959	9.25e-05	PH domain-containing [Botrytis cinerea T4]	no GO terms	0.248182	0.0725911	0.0441536	0.745968	0.037968	0.847307
Bcin03g08030.1	0.257936	9.26e-05	[Botrytis cinerea ]	no GO terms	0.364813	0.00531347	0.110364	0.386508	0.119221	0.476728
Bcin15g01490.1	0.257875	9.29e-05			0.192892	0.185691	0.351438	0.00359624	0.270171	0.0674302
Bcin06g00790.1	0.257844	9.31e-05			-0.0330168	0.873876	0.326574	0.00691566	0.129924	0.433862
Bcin09g05200.1	0.257792	9.34e-05			0.172884	0.244489	0.337127	0.00523569	0.204368	0.186453
Bcin01g02600.1	0.257768	9.35e-05			0.218313	0.124398	0.207976	0.0903264	0.132379	0.423375
Bcin04g03250.1	0.257749	9.35e-05			0.223237	0.115126	0.202469	0.0995575	-0.057732	0.759591
Bcin08g02740.1	0.257598	9.46e-05			0.295591	0.028398	0.20818	0.0900134	0.275488	0.0609941
Bcin02g03490.1	0.257589	9.46e-05			0.244791	0.0782186	0.484305	4.39208e-05	0.17717	0.262195
Bcin13g05480.1	0.257572	9.46e-05			0.092268	0.586594	0.283885	0.0192441	0.201004	0.195359
Bcin10g02070.1	0.257507	9.49e-05			0.477021	0.000121444	0.367404	0.00230774	0.416427	0.00186725
Bcin06g06330.1	0.257502	9.49e-05	60S acidic ribosomal P0 [Botrytis cinerea T4]	C:intracellular ribonucleoprotein complex; P:ribosome biogenesis; C:ribosome; C:intracellular	0.0422952	0.830546	0.34608	0.00414477	0.156267	0.331727
Bcin01g09530.1	0.257439	9.53e-05			-0.024064	0.908666	0.400149	0.000845622	0.309265	0.0317344
Bcin06g01840.1	0.257431	9.53e-05	Grp1p [Botrytis cinerea T4]	F:nucleotide binding; F:nucleic acid binding	0.276696	0.0421746	0.3637	0.00256773	0.241915	0.109323
Bcin05g07070.1	0.257376	9.56e-05			0.264528	0.0534713	0.361408	0.00273081	0.134767	0.413175
Bcin16g01990.1	0.257175	9.7e-05			0.0889718	0.602211	0.267499	0.0277969	0.213253	0.165726
Bcin10g04210.1	0.257128	9.73e-05			0.4586	0.000247347	0.302387	0.0124774	0.326004	0.0224633
Bcin01g01320.1	0.257112	9.73e-05			0.178785	0.225975	0.413538	0.000556662	0.253703	0.0878184
Bcin01g05840.1	0.257011	9.8e-05			0.395212	0.00217033	0.32812	0.00666835	0.295795	0.0416561
Bcin12g00720.1	0.257006	9.8e-05			0.378378	0.0034953	0.300909	0.01295	0.21895	0.153682
Bcin16g00350.1	0.256988	9.8e-05			0.127008	0.42235	0.335703	0.00541911	0.184604	0.242542
Bcin02g08610.1	0.256944	9.83e-05			0.00378459	0.98772	0.305494	0.0116342	0.334604	0.0185838
Bcin03g03440.1	0.256909	9.84e-05			0.104097	0.526501	0.170212	0.170942	0.0232094	0.910267
Bcin14g00410.1	0.256862	9.87e-05			0.0836679	0.626881	0.193706	0.116002	0.23105	0.128102
Bcin03g03660.1	0.256823	9.89e-05	transaldolase [Botrytis cinerea T4]	F:nucleic acid binding	0.222396	0.116642	0.236272	0.0532758	-0.0895551	0.60702
Bcin12g00030.1	0.256793	9.91e-05			0.385472	0.00290244	0.345293	0.00423606	0.324132	0.0232781
Bcin07g00420.1	0.256762	9.92e-05			0.246066	0.0763325	0.250787	0.0395646	0.331701	0.0196484
Bcin02g01370.1	0.256718	9.95e-05			0.236706	0.0906487	0.369872	0.00213059	0.182596	0.246701
Bcin11g03090.1	0.256597	0.000100377	fructose-bisphosphate aldolase [Botrytis cinerea ]	F:zinc ion binding; P:glycolytic process; F:fructose-bisphosphate aldolase activity	0.261842	0.0563234	0.348237	0.00391351	0.066115	0.716562
Bcin07g00460.1	0.256554	0.000100631			0.457271	0.000259602	0.260418	0.0322723	0.329598	0.0205955
Bcin10g03790.1	0.256529	0.00010066			0.163009	0.276437	0.389243	0.00120635	0.417065	0.00183684
Bcin12g06350.1	0.256526	0.00010066			0.173983	0.240919	0.283478	0.0194221	0.0736571	0.681465
Bcin04g06300.1	0.256422	0.000101416			0.304504	0.0232547	0.208261	0.0898594	0.129232	0.435931
Bcin04g04250.1	0.256371	0.00010173	[Botrytis cinerea ]	no GO terms	0.384509	0.00295674	0.21663	0.0776216	0.183112	0.245587
Bcin16g03780.1	0.256344	0.000101855			0.00746066	0.975745	0.425176	0.00037029	0.0930005	0.591368
Bcin01g02430.1	0.256316	0.000101992			0.499946	4.77927e-05	0.32302	0.00753597	0.37169	0.00693899
Bcin02g06670.1	0.256266	0.000102304			0.279734	0.0396023	0.186327	0.131452	0.218719	0.153727
Bcin04g03410.1	0.256174	0.000102967			0.388511	0.00266098	0.455358	0.000138514	0.322965	0.0236776
Bcin06g06810.1	0.25607	0.000103736			0.0842105	0.624156	0.317458	0.0085856	0.305426	0.0347458
Bcin13g02330.1	0.256003	0.000104196			0.29981	0.0258765	0.4656	9.46467e-05	0.201465	0.194222
Bcin15g01610.1	0.255889	0.000105059			0.0437873	0.823345	0.28847	0.0173107	0.250109	0.0935035
Bcin11g05580.1	0.255869	0.000105128			-0.0542594	0.771676	0.272382	0.0249787	-0.00664677	0.977331
Bcin12g06470.1	0.25584	0.000105274			0.434672	0.000555916	0.333966	0.0056896	0.307556	0.0331245
Bcin16g03080.1	0.255802	0.000105498	transcription factor	no GO terms	0.291902	0.030804	0.226112	0.0647112	0.00305209	0.989141
Bcin13g03000.2	0.255727	0.000106035			0.279409	0.0398317	0.142187	0.257907	0.0010038	0.996366
Bcin06g04400.1	0.255622	0.000106727			0.265925	0.0518983	0.100217	0.434566	0.264202	0.0742755
Bcin10g02430.1	0.255622	0.000106727			0.245429	0.0772582	0.344967	0.00427118	0.0789067	0.659041
Bcin12g04690.1	0.255573	0.000107049			0.187466	0.20005	0.300678	0.0130014	0.107813	0.524948
Bcin02g02280.1	0.255411	0.000108354			0.177238	0.230575	0.226139	0.0646998	0.193136	0.216359
Bcin09g03020.1	0.255353	0.000108756			0.161761	0.280366	0.259631	0.032843	0.159631	0.321266
Bcin02g01770.1	0.255266	0.000109415	hypothetical protein BofuT4_P108960.1	F:oxidoreductase activity, acting on the CH-OH group of donors, NAD or NADP as acceptor; F:NAD binding; P:glycerol-3-phosphate catabolic process; P:oxidation-reduction process	0.361245	0.0058698	0.304626	0.0118303	0.361869	0.00902188
Bcin03g07150.1	0.255066	0.000111041			0.0778486	0.657032	0.325054	0.00720171	0.139894	0.392152
Bcin02g07060.1	0.255059	0.000111041			0.152103	0.316756	0.104409	0.414095	0.180005	0.253638
Bcin02g04190.1	0.255003	0.000111434			0.0544357	0.770573	0.289677	0.0168079	0.295836	0.0416561
Bcin06g04330.1	0.254922	0.000112059			0.117553	0.462353	0.218407	0.0751071	-0.0358519	0.857217
Bcin08g05440.1	0.254843	0.000112664			0.227387	0.106946	0.28634	0.0181337	0.0860418	0.623913
Bcin03g07420.1	0.254785	0.000113086			0.424064	0.000809101	0.452808	0.000153017	0.316888	0.0272536
Bcin01g05710.1	0.254734	0.000113411			0.380033	0.00331154	0.37656	0.00177251	0.28029	0.056308
Bcin12g04460.1	0.254726	0.000113411			0.387507	0.00273621	0.18554	0.133265	0.211937	0.169158
Bcin13g01640.1	0.254544	0.000114885			0.112792	0.483627	0.172613	0.164585	0.170714	0.282831
Bcin06g05040.1	0.254541	0.000114885			-0.0442485	0.82141	0.343313	0.00446652	0.182569	0.246701
Bcin03g02950.1	0.254464	0.000115429			-0.0121134	0.95867	0.342811	0.00451664	0.206375	0.181874
Bcin10g06020.1	0.254459	0.000115429			0.0717037	0.6881	0.193787	0.115838	0.194479	0.213162
Bcin16g02850.1	0.254426	0.000115627	fad binding domain	F:oxidoreductase activity, acting on CH-OH group of donors; F:flavin adenine dinucleotide binding; P:oxidation-reduction process	0.0966224	0.564107	0.369818	0.00213233	0.0973413	0.573295
Bcin11g03210.1	0.254406	0.000115705			0.161788	0.28029	0.307515	0.0110248	0.0565111	0.764965
Bcin03g07630.1	0.254374	0.000115885	60S ribosomal L7 [Botrytis cinerea ]	C:ribosome	0.0642973	0.724687	0.3387	0.00501599	0.0934617	0.589579
Bcin01g07070.2	0.254303	0.000116441	copper transporter	C:integral component of membrane; F:copper ion transmembrane transporter activity; P:copper ion transmembrane transport	0.145388	0.343813	0.380399	0.00156309	0.238158	0.115096
Bcin13g03000.1	0.254117	0.000118078			0.238999	0.087188	0.242404	0.0471734	0.0792865	0.657254
Bcin06g06560.1	0.254003	0.000118986			0.000488334	0.998749	0.328473	0.0066119	0.0886055	0.611699
Bcin14g00120.1	0.253998	0.000118986			0.302035	0.0246134	0.431253	0.000308019	0.0906538	0.602339
Bcin06g05640.1	0.253961	0.000119234	DNA-directed RNA polymerases I and III subunit RPAC1 [Botrytis cinerea T4]	F:DNA-directed 5'-3' RNA polymerase activity; P:transcription, DNA-templated; F:protein dimerization activity	-0.000474769	0.998749	0.403744	0.00074858	0.271568	0.0657398
Bcin13g02320.1	0.253841	0.00012017			0.381145	0.00319562	0.440125	0.000231925	0.171867	0.279398
Bcin05g00960.1	0.253839	0.00012017			0.148454	0.331085	0.409007	0.000634038	0.218543	0.154011
Bcin16g01430.1	0.253754	0.000120882			0.358804	0.00615367	0.413904	0.000550087	0.270429	0.0672185
Bcin14g04140.1	0.253733	0.000120973			0.243842	0.0797054	0.255887	0.0355819	0.206416	0.18178
Bcin09g06630.1	0.253651	0.00012166			0.203052	0.158139	0.361232	0.00274286	0.0409523	0.835492
Bcin04g05300.1	0.253607	0.000121972			0.343719	0.00893382	0.404558	0.000727603	0.215491	0.160681
Bcin09g05760.2	0.253584	0.000122079	elongation factor 1-alpha [Botrytis cinerea ]	F:GTP binding; F:translation elongation factor activity; C:cytoplasm; F:GTPase activity; P:translational elongation	0.167743	0.26063	0.329083	0.00651085	-0.00602279	0.978609
Bcin11g01960.1	0.253503	0.000122757	hypothetical protein BcDW1_4892	no GO terms	0.122002	0.442472	0.152103	0.224794	0.0956321	0.580369
Bcin01g00750.1	0.253453	0.000123136			0.32439	0.0144417	0.534984	4.52322e-06	0.244615	0.103806
Bcin02g08520.1	0.253405	0.000123426			0.0854449	0.617975	0.35194	0.0035433	0.00459848	0.983371
Bcin07g06210.1	0.253391	0.000123426			0.438497	0.000498434	0.19745	0.10865	0.120903	0.470438
Bcin03g02720.1	0.25338	0.000123426	CDP-diacylglycerol-glycerol-3-phosphate 3-phosphatidyltransferase	F:catalytic activity; F:CDP-diacylglycerol-glycerol-3-phosphate 3-phosphatidyltransferase activity; P:cardiolipin biosynthetic process	0.0973277	0.561541	0.237344	0.0521975	-0.0364623	0.854048
Bcin11g06020.1	0.253367	0.000123426	26S protease regulatory subunit 6A [Botrytis cinerea ]	F:ATP binding; C:cytoplasm; P:protein catabolic process; P:proteolysis; F:peptidase activity	0.180846	0.219355	0.19962	0.104589	0.054178	0.774964
Bcin04g03000.1	0.253366	0.000123426			0.113985	0.478938	0.185364	0.133724	0.233003	0.124382
Bcin07g04820.1	0.25327	0.000124256			0.26659	0.0513018	0.204069	0.0968895	0.268028	0.0702184
Bcin06g04240.1	0.253245	0.000124396			0.123603	0.435826	0.373196	0.00193651	0.148467	0.360938
Bcin05g03080.1	0.253166	0.000125047			0.417065	0.00104321	0.171324	0.167694	0.0677835	0.709132
Bcin04g06860.1	0.253156	0.000125047			0.373494	0.00406663	0.317295	0.00861556	0.224091	0.142453
Bcin08g06460.1	0.253105	0.000125444			0.362249	0.00570091	0.180738	0.14443	0.245659	0.101908
Bcin09g03910.1	0.253093	0.000125444			0.432528	0.000589201	0.348399	0.0038919	0.274457	0.0621657
Bcin11g05890.1	0.252867	0.000127609			0.3613	0.00586832	0.298047	0.0138956	0.250529	0.0928721
Bcin06g05760.1	0.252789	0.000128291			0.183302	0.212532	0.347491	0.00399027	0.169154	0.288321
Bcin02g01880.1	0.252768	0.00012839	nmrA-like family [Botrytis cinerea T4]	no GO terms	0.242241	0.0819115	0.324919	0.00720962	0.309333	0.0317344
Bcin09g05580.1	0.252729	0.000128668			0.338388	0.0102793	0.334414	0.00562165	0.258275	0.0814353
Bcin12g00930.1	0.2525	0.000130923			0.139352	0.368877	0.227998	0.0625597	0.0477347	0.806234
Bcin16g01250.1	0.252487	0.000130934			0.103052	0.531769	0.20491	0.0954212	0.276709	0.0598191
Bcin06g04820.1	0.25238	0.000131818			0.247721	0.0733551	0.351302	0.00360958	0.322762	0.0236776
Bcin08g05400.1	0.252301	0.000132527			0.207054	0.149156	0.383044	0.00143787	0.102916	0.547578
Bcin11g03990.1	0.252267	0.000132767			0.352767	0.00724582	0.150421	0.22993	-0.0848616	0.630278
Bcin15g03390.1	0.252232	0.000132982			0.266007	0.051838	0.145266	0.247721	0.148142	0.362198
Bcin15g03530.1	0.252223	0.000132982			0.248698	0.0719078	0.37717	0.00173494	0.256728	0.0828996
Bcin14g04560.1	0.252202	0.000133084			0.295931	0.0281327	0.288131	0.0174125	0.215925	0.159604
Bcin10g00540.1	0.252078	0.000134282			0.127401	0.420546	0.208695	0.0894483	0.144655	0.375874
Bcin03g02850.1	0.252058	0.000134374			0.281321	0.0382909	0.121595	0.337031	0.218136	0.154528
Bcin15g00320.1	0.251993	0.000134946	hypothetical protein BC1G_12400	no GO terms	0.181063	0.219004	0.273833	0.0242023	0.171039	0.281842
Bcin02g07360.2	0.251976	0.000135012			0.322192	0.0152498	0.187046	0.13001	0.158342	0.32568
Bcin03g00630.1	0.251883	0.00013589			0.0708763	0.691764	0.0619913	0.641172	0.210486	0.172185
Bcin05g04510.1	0.251821	0.00013644			0.0445876	0.81988	0.264976	0.0293078	0.0574335	0.760687
Bcin10g03170.1	0.251792	0.000136622			0.334536	0.0112738	0.264202	0.0297991	0.265518	0.0731545
Bcin16g03560.1	0.251767	0.000136771			0.287154	0.0338069	0.18341	0.138356	0.252292	0.0899268
Bcin16g04520.1	0.251576	0.000138734			0.382284	0.00308011	0.227577	0.0630585	0.293109	0.043932
Bcin05g00370.1	0.251559	0.000138797			0.194547	0.181619	0.226465	0.0643126	0.155521	0.334091
Bcin03g06600.1	0.251541	0.000138877			0.138483	0.372666	0.3285	0.00660947	0.0401791	0.837656
Bcin16g01900.1	0.251512	0.000139073			0.302984	0.024087	0.350909	0.0036509	0.201492	0.194222
Bcin12g05000.1	0.251335	0.00014091			0.406158	0.00153841	0.3406	0.00478093	0.274227	0.0624494
Bcin06g04370.1	0.2513	0.000141176			0.334292	0.0113131	0.213918	0.0813356	0.170836	0.282639
Bcin15g00860.1	0.251278	0.000141291			0.280629	0.0387444	0.428215	0.000332944	0.183275	0.245147
Bcin01g09920.1	0.251184	0.000142225			-0.0231823	0.912234	0.266508	0.0284077	0.261883	0.077017
Bcin09g06480.1	0.2511	0.000143045	60S ribosomal L24 [Botrytis cinerea ]	C:ribosome	0.0695469	0.698391	0.352211	0.00351147	0.237263	0.11685
Bcin13g00720.1	0.251076	0.00014319			0.27245	0.0460792	0.332393	0.00596406	0.321812	0.0241647
Bcin02g02020.1	0.250936	0.000144652			0.126275	0.425439	0.34612	0.00414451	0.202564	0.191307
Bcin11g02110.1	0.250923	0.000144673	arginine n-methyltransferase [Botrytis cinerea T4]	F:methyltransferase activity; P:protein methylation	0.0847802	0.621815	0.34414	0.00437303	0.221677	0.147352
Bcin05g03900.1	0.250888	0.000144941			0.128554	0.417086	0.158383	0.205873	0.303093	0.0360662
Bcin08g00060.1	0.250842	0.000145336			0.0795171	0.648111	0.229775	0.0604332	0.263972	0.0744987
Bcin02g08780.1	0.250791	0.000145802			0.389514	0.00261216	0.438049	0.000247983	0.414514	0.00198963
Bcin14g04280.1	0.250552	0.000148355	mating-type alpha-pheromone receptor		-0.219398	0.122172	0.130982	0.300148	0.0717309	0.691868
Bcin01g05590.1	0.250549	0.000148355	eukaryotic initiation factor 4A [Botrytis cinerea ]	F:nucleic acid binding; F:ATP binding	0.0659116	0.716736	0.29471	0.0149462	0.107895	0.524707
Bcin11g05900.1	0.250483	0.000148996	60S ribosomal L6 [Botrytis cinerea ]	F:structural constituent of ribosome; C:ribosome; P:translation	0.135852	0.382924	0.387697	0.00126002	0.220958	0.148963
Bcin02g04200.1	0.250368	0.000150222			0.227876	0.106268	0.200407	0.103166	0.247708	0.0977416
Bcin08g06790.1	0.250344	0.000150375			0.0399485	0.840354	0.359333	0.00286891	0.279693	0.0569565
Bcin07g05620.1	0.250298	0.000150785			0.0337358	0.870021	0.367444	0.00230774	0.260581	0.078735
Bcin15g04370.1	0.250285	0.000150807			0.00188551	0.993933	0.298616	0.0137177	-0.0834102	0.636779
Bcin15g04060.1	0.250179	0.000151869	c3hc4 type (ring finger) zinc finger containing	F:zinc ion binding	0.40506	0.00157885	0.10723	0.40081	0.138524	0.395951
Bcin07g04810.1	0.250165	0.000151869	hypothetical protein BC1G_07215	P:carbohydrate metabolic process; F:hydrolase activity, hydrolyzing O-glycosyl compounds; F:beta-N-acetylhexosaminidase activity	0.337602	0.0105142	0.413388	0.000559589	0.376262	0.00616752
Bcin08g06690.1	0.25016	0.000151869	hypothetical protein BC1G_11457 [Botrytis cinerea B05.10]	C:integral component of membrane	0.286964	0.0339588	0.073535	0.574266	0.0340749	0.863951
Bcin06g02500.1	0.250151	0.000151869			0.334929	0.0111693	0.226085	0.0647394	0.297206	0.0407337
Bcin03g07410.1	0.250077	0.000152621			0.268937	0.0490406	0.146066	0.244902	0.119411	0.476436
Bcin15g05490.1	0.250003	0.000153309			0.280711	0.0386979	0.138782	0.270097	0.252225	0.0900024
Bcin14g03520.1	0.249998	0.000153309			0.466549	0.000181624	0.148888	0.235462	0.272857	0.0643686
Bcin01g10350.1	0.249868	0.000154753			0.00788117	0.974237	0.359211	0.0028789	0.169669	0.285947
Bcin01g10500.1	0.249845	0.000154893			0.188294	0.197894	0.587371	2.95261e-08	0.27892	0.05768
Bcin03g04810.1	0.249831	0.000154935	polyadenylate-binding [Botrytis cinerea T4]	F:nucleotide binding; F:nucleic acid binding; F:RNA binding; C:cytoplasm	0.251818	0.0678349	0.264392	0.0296835	0.176574	0.264529
Bcin02g06960.1	0.249818	0.000154952			0.209007	0.144602	0.259265	0.033095	0.204924	0.185242
Bcin13g00030.1	0.249803	0.000155007			0.350638	0.00760411	0.385879	0.0013215	0.403893	0.00286485
Bcin12g02670.1	0.249761	0.000155375			0.178798	0.225975	0.282922	0.0196314	0.17911	0.256993
Bcin10g01180.1	0.249733	0.000155583	atp-binding cassette sub-family f member 2	F:ATPase activity; F:ATP binding	0.220917	0.119298	0.224905	0.0660696	0.137398	0.401028
Bcin05g08030.1	0.249709	0.000155749			0.107963	0.507615	0.316753	0.00871564	0.26678	0.071808
Bcin12g03670.1	0.249679	0.000155977	hypothetical protein BC1G_08721	no GO terms	0.335377	0.0110732	0.324091	0.00735018	0.106308	0.532395
Bcin03g05520.1	0.249623	0.000156533			0.349973	0.00771874	0.307827	0.0109299	0.210065	0.173113
Bcin05g04050.1	0.249551	0.000157208			0.349539	0.00777064	0.235174	0.0544127	0.203717	0.188175
Bcin14g01530.1	0.249546	0.000157208			0.231362	0.0996556	0.435445	0.000268025	0.247721	0.0977416
Bcin09g01960.1	0.249505	0.000157582			0.121595	0.444259	0.413063	0.00056318	0.0603771	0.745761
Bcin09g03130.1	0.249441	0.000158231			0.330141	0.0124812	0.336137	0.00536415	0.20255	0.191307
Bcin13g01340.1	0.249348	0.000159253			0.3078	0.0216548	0.146175	0.244539	0.23923	0.113845
Bcin01g07240.1	0.249239	0.000160484			0.0630629	0.729452	0.291875	0.0160152	0.00724362	0.974762
Bcin01g02510.2	0.249223	0.000160548			0.18147	0.217966	0.330345	0.00630319	0.267648	0.0707918
Bcin03g05350.1	0.249105	0.000161903			0.202198	0.160125	0.233966	0.0556237	0.0163321	0.941889
Bcin06g00630.1	0.249073	0.000162135			0.258152	0.0608057	0.130996	0.300126	0.34216	0.0152964
Bcin05g01380.1	0.249064	0.000162135	NADH-cytochrome b5 reductase [Botrytis cinerea ]	C:integral component of mitochondrial outer membrane; F:cytochrome-b5 reductase activity, acting on NAD(P)H; C:mitochondrial intermembrane space; P:ergosterol biosynthetic process; P:cellular response to oxidative stress; P:oxidation-reduction process	0.27325	0.0454637	0.211612	0.0848855	0.0874932	0.616728
Bcin09g07010.1	0.249054	0.000162135			0.336462	0.0108335	0.396297	0.00095952	0.214582	0.162834
Bcin12g01790.1	0.249043	0.000162136			-0.050312	0.791368	0.321812	0.00772444	0.200407	0.196192
Bcin04g06850.1	0.24899	0.000162669			0.354286	0.00690728	0.468733	8.45907e-05	0.332271	0.0194142
Bcin01g01160.1	0.248899	0.000163693			0.323725	0.0147045	0.396053	0.000968725	0.135364	0.410334
Bcin09g01840.1	0.248881	0.000163791			0.141251	0.360074	0.298549	0.0137296	0.206158	0.182463
Bcin06g05660.1	0.248841	0.00016416			0.249308	0.0707813	0.172341	0.165319	0.150136	0.35502
Bcin08g05110.1	0.248496	0.000168518			0.25586	0.0632676	0.298711	0.0136809	0.0878188	0.614811
Bcin11g02950.1	0.248348	0.000170332			0.118041	0.460829	0.184143	0.136428	0.220157	0.150668
Bcin10g05290.1	0.248286	0.000170966			0.204951	0.153908	0.0975312	0.44757	0.213687	0.164908
Bcin11g02230.1	0.248279	0.000170966			0.217282	0.126788	0.439202	0.000239115	0.0674986	0.709871
Bcin14g05500.1	0.248187	0.000171962	Bcgod1		0.455697	0.000280214	0.367119	0.00232647	0.290762	0.046168
Bcin12g05630.1	0.248174	0.000171962			0.217634	0.126036	0.397409	0.000925743	0.201044	0.195279
Bcin05g04420.1	0.248172	0.000171962	mitochondrial processing peptidase beta mitochondrial precursor [Botrytis cinerea ]	F:catalytic activity; F:metal ion binding; P:proteolysis; F:metalloendopeptidase activity	0.185879	0.204643	0.388565	0.00123092	0.0849295	0.629911
Bcin02g08080.1	0.248119	0.000172532			0.285499	0.0349766	0.242634	0.046933	0.472341	0.000252032
Bcin15g03560.1	0.247939	0.000174827			0.175149	0.237048	0.267851	0.0275742	0.124769	0.455008
Bcin16g02680.1	0.247757	0.000177178			0.221772	0.117848	0.136598	0.278475	0.0346717	0.862107
Bcin09g02420.1	0.247738	0.000177291			0.303988	0.0235508	0.0510309	0.704095	-0.038904	0.843923
Bcin12g06330.1	0.247622	0.000178594			0.291101	0.0313297	0.111476	0.381194	0.241047	0.111041
Bcin02g07290.1	0.247492	0.00018023			0.460784	0.000226883	0.295931	0.0145786	0.257393	0.0823051
Bcin02g02840.1	0.247484	0.00018023			0.252957	0.0664716	0.391373	0.00113728	0.446134	0.000704095
Bcin06g02350.1	0.247327	0.000182293	nucleolar gtp-binding 2 [Botrytis cinerea 1]	F:GTP binding; C:nucleolus	0.0466359	0.809476	0.363551	0.00258094	0.162371	0.312079
Bcin15g02080.1	0.247047	0.000186003	mitochondrial ATP synthase beta subunit [Botrytis cinerea T4]	C:proton-transporting ATP synthase complex, catalytic core F(1); F:ATP binding; P:ATP hydrolysis coupled proton transport; P:ATP synthesis coupled proton transport; F:proton-transporting ATP synthase activity, rotational mechanism	0.336937	0.0107052	0.347179	0.00401815	0.228785	0.132631
Bcin03g07350.1	0.246992	0.000186633			0.4465	0.000382805	0.445279	0.000197033	0.333668	0.0189127
Bcin03g01830.1	0.246818	0.00018903			0.39513	0.00217166	0.327984	0.00668892	0.371961	0.00688513
Bcin03g00760.1	0.246754	0.000189702			0.120944	0.44747	0.101329	0.42898	0.132379	0.423375
Bcin02g01210.1	0.24675	0.000189702			0.0286761	0.891074	0.287222	0.0177991	0.0991183	0.563155
Bcin16g04810.1	0.246739	0.000189713	60S ribosomal L28 [Botrytis cinerea ]	F:structural constituent of ribosome; C:ribosome; P:translation	0.116793	0.465987	0.325231	0.00717323	0.140749	0.38838
Bcin06g05580.1	0.246618	0.000191178	hypothetical protein BofuT4_P142230.1 [Botrytis cinerea T4]	no GO terms	0.388456	0.00266098	0.271758	0.0253276	0.319886	0.0252265
Bcin12g06780.1	0.246579	0.000191592			0.225719	0.110158	0.317254	0.00861911	0.260933	0.0783118
Bcin08g04700.1	0.246529	0.00019218			0.253676	0.0654961	0.318774	0.00828232	-0.0544086	0.774464
Bcin04g00140.1	0.2465	0.000192462			0.339786	0.00987621	0.289514	0.0168606	0.185336	0.240453
Bcin04g04090.1	0.246308	0.000195181			0.184617	0.208427	0.186923	0.130198	0.0615165	0.740333
Bcin10g04580.1	0.246253	0.000195848			0.191007	0.190259	0.301397	0.0128063	0.0190586	0.93151
Bcin02g05490.1	0.246151	0.000197239			0.511544	2.8098e-05	0.411896	0.000582974	0.273589	0.0634361
Bcin10g05680.1	0.246135	0.00019732			0.230724	0.100773	0.455874	0.00013564	0.183722	0.244181
Bcin06g06290.1	0.246112	0.000197509			0.10369	0.528366	0.246826	0.0428978	0.255331	0.0851418
Bcin01g03860.1	0.2461	0.000197529			0.120632	0.448487	0.372816	0.00196342	0.343204	0.0148775
Bcin05g00140.1	0.246088	0.000197557			0.523752	1.49255e-05	0.292336	0.0158664	0.129707	0.434872
Bcin16g00880.1	0.246027	0.000198317			0.133315	0.395142	0.408519	0.000642875	0.324362	0.0232274
Bcin03g02800.1	0.245919	0.000199819			0.233275	0.0961923	0.252008	0.0385861	0.13672	0.403923
Bcin10g03910.1	0.245843	0.000200845	heat shock [Botrytis cinerea ]	F:ATP binding; P:protein metabolic process	0.282528	0.037267	0.371487	0.00202481	0.256552	0.0831294
Bcin01g06220.2	0.245812	0.000201155	GTP-binding nuclear ran-1 [Botrytis cinerea ]	F:nucleotide binding; F:GTP binding; P:nucleocytoplasmic transport; C:nucleus; P:small GTPase mediated signal transduction; P:signal transduction; F:GTPase activity; P:protein transport; P:intracellular protein transport; P:transport	0.0816196	0.637193	0.421948	0.000415813	0.133437	0.418312
Bcin05g02200.1	0.24574	0.000202118			0.234143	0.0948095	0.248277	0.0416416	0.0836137	0.635778
Bcin08g03060.1	0.245681	0.000202751			0.0382935	0.84853	0.295551	0.0147021	0.3172	0.0270025
Bcin08g04500.1	0.245678	0.000202751			0.0311991	0.879993	0.310567	0.0101579	0.191942	0.220246
Bcin02g06240.1	0.245581	0.000204047			0.123277	0.437011	0.456511	0.000131681	0.246555	0.10035
Bcin06g04470.1	0.245559	0.000204047			0.135988	0.382269	0.167119	0.179805	0.0603771	0.745761
Bcin03g09320.1	0.245556	0.000204047			0.182176	0.215874	0.429409	0.000321629	0.206999	0.180491
Bcin06g04460.1	0.245553	0.000204047			0.123399	0.436577	0.193448	0.116504	0.208492	0.176799
Bcin03g04300.1	0.245534	0.000204172			0.388321	0.00266218	0.123535	0.329135	0.325014	0.0230243
Bcin09g06730.1	0.245475	0.000204934			0.170361	0.252525	0.363741	0.00256588	-0.0676479	0.709543
Bcin10g00110.1	0.245453	0.000205124			0.193095	0.18503	0.31267	0.00969303	0.221989	0.14705
Bcin03g08910.1	0.245406	0.000205689			0.333478	0.0114637	0.233207	0.0563976	0.285106	0.0516168
Bcin02g00470.1	0.24535	0.000206416			0.204992	0.153908	0.429775	0.000319141	0.121568	0.467834
Bcin11g00830.1	0.245252	0.000207814			0.255779	0.0633205	0.361232	0.00274286	0.177727	0.260099
Bcin03g04080.1	0.24524	0.000207837			0.179992	0.222042	0.142404	0.257414	0.158139	0.326132
Bcin09g01440.1	0.245139	0.000209302			0.212588	0.136168	0.509482	1.42671e-05	0.377794	0.00595304
Bcin16g01420.1	0.245126	0.000209333			0.170917	0.251215	0.179504	0.147457	0.0863266	0.622759
Bcin09g04940.1	0.245097	0.000209641			0.464867	0.000189193	0.386082	0.00131467	0.304693	0.0350557
Bcin06g04930.1	0.245083	0.000209689			0.202198	0.160125	0.134794	0.285357	0.208668	0.176552
Bcin14g01880.1	0.244889	0.000212679			0.128228	0.418143	0.307868	0.0109202	0.18455	0.242542
Bcin06g05690.1	0.244837	0.000213355			0.119967	0.451094	0.3551	0.00326821	0.179029	0.257099
Bcin02g04450.1	0.244738	0.000214823			0.191875	0.188203	0.211869	0.0844773	0.0562127	0.766708
Bcin04g04400.1	0.244484	0.000218897			0.0583424	0.751916	0.312086	0.00983432	0.120103	0.473698
Bcin03g02500.1	0.244391	0.00022011			0.277659	0.0413197	0.372504	0.00197889	0.0726126	0.687525
Bcin09g02500.1	0.244362	0.000220417			0.202089	0.160359	0.220849	0.0715153	0.171514	0.280444
Bcin01g09060.1	0.244348	0.000220476			0.0779029	0.656777	0.419262	0.000455583	0.254015	0.087239
Bcin04g01660.1	0.244199	0.000222653			0.0908709	0.593513	0.441861	0.000220141	0.130643	0.431599
Bcin06g02610.1	0.244075	0.000224615			-0.0437466	0.823589	0.0405453	0.767496	-0.0386191	0.844747
Bcin09g02460.1	0.244027	0.000225259			0.179721	0.222925	0.441481	0.000223187	0.116644	0.486706
Bcin11g04040.1	0.243846	0.000228228			0.155005	0.305547	0.305114	0.011733	0.118665	0.478413
Bcin06g02430.1	0.243715	0.000230361			0.348508	0.00797258	0.445971	0.000192451	0.276044	0.0604202
Bcin05g03050.1	0.243659	0.000231163			0.352442	0.00727708	0.294004	0.0152071	0.158966	0.323413
Bcin01g01800.1	0.243555	0.000232828	40S ribosomal S4 [Botrytis cinerea ]	F:RNA binding; F:structural constituent of ribosome; C:intracellular ribonucleoprotein complex; C:ribosome; F:rRNA binding; C:intracellular; P:translation	0.1043	0.525664	0.297002	0.0142012	0.142214	0.383538
Bcin12g05730.1	0.243524	0.000232928	dihydrolipoamide acetyltransferase component E2 of pyruvate dehydrogenase complex [Botrytis cinerea ]	C:pyruvate dehydrogenase complex; C:mitochondrial matrix; P:pyruvate metabolic process; F:dihydrolipoyllysine-residue acetyltransferase activity	0.211367	0.139221	0.406118	0.000690175	0.100882	0.556038
Bcin11g06450.1	0.243519	0.000232928			0.326004	0.0139322	0.315762	0.00894605	0.351207	0.0119301
Bcin04g00580.1	0.243518	0.000232928			0.133207	0.395532	0.207094	0.0918619	0.214691	0.162586
Bcin03g05490.1	0.243357	0.000235215			0.385079	0.00291222	0.522396	7.97813e-06	0.32755	0.0215825
Bcin14g03490.1	0.24335	0.000235215			0.157393	0.296223	0.262005	0.0312383	0.103106	0.546846
Bcin12g00190.1	0.243348	0.000235215	GMP synthase [Botrytis cinerea T4]	F:ATP binding; F:GMP synthase (glutamine-hydrolyzing) activity; F:pyrophosphatase activity; P:GMP biosynthetic process	-0.031701	0.878117	0.253893	0.0370557	0.0280521	0.889804
Bcin10g01870.1	0.243252	0.000236762			0.375421	0.00383126	0.379029	0.00163664	0.31404	0.0287055
Bcin11g00130.1	0.243225	0.000237065			0.0793407	0.648797	0.327387	0.00678531	0.195456	0.21017
Bcin02g07710.1	0.242994	0.000240914			0.291074	0.0313297	0.366278	0.0023843	0.181362	0.250346
Bcin02g02100.1	0.24293	0.000241909			0.219479	0.122085	0.170117	0.171144	0.24022	0.112367
Bcin07g02680.1	0.242843	0.000243329			-0.00921053	0.969572	0.426913	0.000347375	-0.0170781	0.939025
Bcin04g01450.1	0.242787	0.000244184			0.0230195	0.912941	0.437018	0.000257999	0.14201	0.384085
Bcin12g06530.1	0.242765	0.00024436			0.23086	0.100545	0.111842	0.379644	0.0887547	0.610857
Bcin06g03340.1	0.242748	0.00024436			0.183207	0.212902	0.228432	0.0620916	0.144059	0.378633
Bcin04g01670.1	0.242746	0.00024436			0.185974	0.204408	0.287073	0.0178181	0.0421324	0.830723
Bcin15g01100.1	0.242598	0.000246939			0.124715	0.431501	0.397056	0.000936546	0.261205	0.0777599
Bcin15g00510.1	0.242509	0.000248381			0.418855	0.000988045	0.407718	0.000661794	0.226153	0.137997
Bcin03g09250.1	0.242501	0.000248381	kinase [Botrytis cinerea T4]	P:phosphorylation; F:kinase activity	0.305684	0.0227615	0.164365	0.188108	0.197979	0.202951
Bcin12g06220.1	0.242478	0.000248622			0.186544	0.202586	0.250027	0.0401682	0.157623	0.328284
Bcin16g01450.1	0.242434	0.000249096			0.256253	0.0628697	0.31309	0.0095773	0.0483993	0.8026
Bcin02g01170.1	0.242433	0.000249096			0.282528	0.037267	0.260553	0.0321921	0.19962	0.198214
Bcin12g04490.1	0.242391	0.000249693			0.30506	0.0229734	0.364826	0.00248518	0.497653	8.51315e-05
Bcin09g01460.1	0.242366	0.000249974			0.273209	0.045489	0.24003	0.0494149	0.334984	0.018488
Bcin12g01310.1	0.242269	0.000251623			0.360513	0.00596014	0.207691	0.0907954	0.0545442	0.773929
Bcin01g10710.1	0.242113	0.000254451			0.419493	0.000970604	0.318068	0.00841695	0.23889	0.114082
Bcin10g01490.1	0.24203	0.000255853			0.260255	0.0583303	0.309088	0.0105478	0.150353	0.354617
Bcin13g02550.1	0.24195	0.000257223			0.364542	0.00535285	0.265464	0.0289976	0.321256	0.0243871
Bcin11g01660.1	0.241913	0.00025775			0.198128	0.170818	0.224281	0.0669551	0.0104178	0.964539
Bcin01g07460.1	0.2419	0.000257803			0.0163456	0.939271	0.348956	0.00384142	-0.0496202	0.797174
Bcin06g05200.1	0.241842	0.000258727			0.265423	0.0524128	0.310865	0.0100955	0.279707	0.0569565
Bcin01g06200.1	0.241771	0.000259897			-0.0437873	0.823345	0.36682	0.0023496	0.181837	0.249133
Bcin10g05950.1	0.241762	0.000259897			0.279883	0.0394929	0.343923	0.00439787	0.180534	0.252286
Bcin11g05170.1	0.241665	0.000261619	EIF3H_BOTFB, Eukaryotic translation initiation factor 3 subunit H	F:translation initiation factor activity; P:formation of translation preinitiation complex; C:eukaryotic 43S preinitiation complex; C:eukaryotic 48S preinitiation complex; C:eukaryotic translation initiation factor 3 complex	0.00183125	0.994143	0.260757	0.032083	0.125651	0.450737
Bcin11g05680.1	0.241592	0.000262878			-0.0175529	0.934568	0.318991	0.00824055	0.207339	0.179897
Bcin03g00430.1	0.241303	0.00026851			0.194872	0.180844	0.388416	0.00123426	0.201167	0.195057
Bcin12g03990.1	0.241177	0.000270894			0.291698	0.0309053	0.215423	0.0791693	0.213565	0.165186
Bcin06g04810.1	0.241123	0.00027178			0.163104	0.276284	0.424837	0.000374865	0.15704	0.329566
Bcin10g02340.1	0.241041	0.000273283			0.350868	0.00757331	0.423684	0.000390862	0.389731	0.00430817
Bcin14g01770.1	0.241003	0.000273842			0.252401	0.0671296	0.296555	0.01436	0.270985	0.0663757
Bcin01g00660.1	0.240953	0.000274684			0.238945	0.0872724	0.283858	0.0192528	0.180969	0.251247
Bcin06g04010.2	0.240941	0.00027471			0.255711	0.0633583	0.131905	0.296385	0.196758	0.206684
Bcin01g02000.1	0.240869	0.000275845			0.00945469	0.968808	0.235906	0.053603	0.0481959	0.804046
Bcin14g04590.1	0.240866	0.000275845	40s ribosomal s10b [Botrytis cinerea 1]	C:ribosome	0.158858	0.291486	0.395673	0.000981223	0.170103	0.284494
Bcin03g02380.1	0.240645	0.000280304			0.210621	0.140675	0.451791	0.000158459	0.0771026	0.66802
Bcin07g06620.1	0.240566	0.000281643			0.563551	1.69239e-06	0.56111	1.08936e-06	0.354639	0.0110666
Bcin12g06450.1	0.240561	0.000281643			0.0852008	0.619308	0.487208	3.79661e-05	0.280751	0.0556335
Bcin10g02550.1	0.240497	0.00028272			0.234726	0.0939314	0.449254	0.000173403	0.1422	0.383538
Bcin02g08300.1	0.24049	0.00028272			0.297667	0.02699	0.15255	0.223369	0.130996	0.429985
Bcin08g06750.1	0.240468	0.000282974			0.0969072	0.563373	0.212412	0.0835711	0.200719	0.195722
Bcin08g00230.1	0.240404	0.000284146			0.316101	0.0176248	0.153228	0.22106	0.157434	0.328562
Bcin01g06470.1	0.240312	0.000285664			0.291224	0.0313052	0.290328	0.0165781	0.0679056	0.708676
Bcin12g06770.1	0.240306	0.000285664			0.466603	0.000181624	0.407406	0.000664636	0.528893	1.72665e-05
Bcin09g05130.1	0.240303	0.000285664	ww rsp5 wwp [Botrytis cinerea 1]	no GO terms	0.297992	0.0268898	0.113239	0.373876	0.169683	0.285947
Bcin13g03350.1	0.240253	0.000286375			0.400502	0.00181421	0.398521	0.000893736	0.40369	0.00286935
Bcin01g02680.1	0.240249	0.000286375	EIF3B_BOTFB, Eukaryotic translation initiation factor 3 subunit B	C:eukaryotic 48S preinitiation complex; P:translational initiation; P:regulation of translational initiation; C:eukaryotic translation initiation factor 3 complex; P:translation; F:nucleotide binding; F:nucleic acid binding; F:translation initiation factor activity; P:formation of translation preinitiation complex; F:RNA binding; C:cytoplasm; C:eukaryotic 43S preinitiation complex; F:translation …	-0.0081389	0.973591	0.335974	0.00538431	0.163565	0.307686
Bcin06g05680.1	0.24022	0.000286797			0.0519533	0.782916	0.242526	0.0470581	0.118611	0.478732
Bcin14g00400.1	0.240193	0.000287165			0.0841427	0.62442	0.0603093	0.651091	0.141834	0.384364
Bcin06g06320.1	0.240118	0.000288513			-0.0863131	0.614058	0.326492	0.00692846	0.101967	0.552059
Bcin11g00770.1	0.240107	0.000288513			0.163483	0.275234	0.226302	0.0645143	0.1457	0.371688
Bcin05g01670.1	0.2401	0.000288513			0.134373	0.390253	0.338171	0.00508536	0.200407	0.196192
Bcin11g02440.1	0.240084	0.000288607			0.341658	0.00942646	0.144683	0.249445	0.0445198	0.819708
Bcin08g00540.1	0.240076	0.000288607			0.370374	0.00446828	0.352849	0.00347121	0.437181	0.000950773
Bcin07g04960.1	0.239962	0.000290862			0.305874	0.0227494	0.193814	0.115792	-0.0873847	0.617126
Bcin11g03140.1	0.239717	0.000296087			-0.0177564	0.933654	0.292132	0.0159233	0.297165	0.0407337
Bcin01g04530.1	0.239671	0.000296894			0.255792	0.0633205	0.215613	0.0788772	0.336205	0.017903
Bcin05g00070.1	0.239643	0.000297287			0.0181905	0.932366	0.316793	0.00870789	0.285418	0.0512723
Bcin02g08540.1	0.239608	0.000297849			0.106511	0.515205	0.264636	0.0295313	0.304422	0.0352768
Bcin10g03890.1	0.23952	0.000299592	hypothetical protein BC1G_15407 [Botrytis cinerea B05.10]	F:catalytic activity; P:metabolic process	0.236313	0.0914378	0.154314	0.217921	0.047911	0.805115
Bcin02g06770.1	0.239283	0.00030478			0.343787	0.00893382	0.262914	0.0306552	0.151004	0.351907
Bcin16g03620.1	0.239122	0.000308261	hypothetical protein BC1G_10921	F:catalytic activity; F:cis-stilbene-oxide hydrolase activity	0.546392	4.53626e-06	0.499105	2.31007e-05	0.387425	0.00453145
Bcin10g00990.1	0.239052	0.000309651			0.131877	0.401631	0.31153	0.00994787	0.274905	0.0615942
Bcin14g04190.1	0.238974	0.000311045			0.1613	0.282183	0.218055	0.0755807	0.207746	0.178601
Bcin03g01580.1	0.238972	0.000311045			0.210065	0.141919	0.297545	0.0140634	0.329707	0.0205955
Bcin01g11410.1	0.238881	0.000312944			0.313049	0.0190341	0.323725	0.00741686	0.279734	0.0569565
Bcin01g04930.1	0.238736	0.000316009			0.183722	0.210936	0.396894	0.000942088	0.280928	0.0554682
Bcin13g01340.3	0.238732	0.000316009			0.138307	0.373412	0.320564	0.00796157	0.0961069	0.578495
Bcin01g10670.1	0.238586	0.000319249			0.167037	0.263428	0.309617	0.0104053	0.171324	0.281081
Bcin12g00660.1	0.238568	0.000319428			0.294438	0.0290155	0.271839	0.0252813	0.28337	0.0529781
Bcin09g04620.1	0.238517	0.00032043	chaperone heat shock Hsp12 [Botrytis cinerea T4]	P:response to stress	0.219086	0.122831	0.163904	0.189597	-0.00233315	0.991739
Bcin06g05400.1	0.238437	0.000322104			0.170849	0.251353	0.234075	0.0555406	0.271324	0.0659183
Bcin03g06300.1	0.238424	0.000322188			0.227238	0.107168	0.177876	0.151371	-0.0449674	0.818105
Bcin02g00240.1	0.238412	0.000322224			0.296826	0.0275312	0.456905	0.000129899	0.231932	0.126376
Bcin11g01400.1	0.238237	0.000326236			0.034414	0.867263	0.297694	0.0140134	-0.00561584	0.980638
Bcin01g09170.1	0.238157	0.000327963			0.309387	0.0208813	0.433776	0.000283577	0.298711	0.0393545
Bcin10g00440.1	0.238043	0.000330532	flavo oxygenase	F:FMN binding; F:oxidoreductase activity; P:oxidation-reduction process	0.180534	0.220288	0.234007	0.0556096	0.104829	0.538861
Bcin07g00610.1	0.237956	0.000332456			-0.0322843	0.876592	0.330616	0.00626152	0.200705	0.195722
Bcin11g05920.1	0.237743	0.000337553	60S ribosomal L9 [Botrytis cinerea ]	F:structural constituent of ribosome; C:ribosome; F:rRNA binding; P:translation	0.0150163	0.945155	0.392282	0.00110126	0.206525	0.181475
Bcin08g02840.1	0.237679	0.000338902			0.0633071	0.728077	0.319913	0.00806145	0.119778	0.475108
Bcin07g06650.1	0.237668	0.00033894			0.411883	0.00127254	0.410147	0.00061199	0.203147	0.189798
Bcin09g04310.1	0.237622	0.000339605			0.428283	0.000684685	0.154029	0.218644	0.191346	0.222341
Bcin01g02870.1	0.237556	0.000341026	hypothetical protein BC1G_11840	F:FMN binding; F:oxidoreductase activity; F:catalytic activity; P:oxidation-reduction process	0.361001	0.00589368	0.229083	0.0613467	0.108993	0.519952
Bcin03g04540.1	0.237512	0.000341887			0.34159	0.00943327	0.191848	0.119848	0.222572	0.145675
Bcin13g02670.1	0.237485	0.000342325			0.234278	0.0947286	0.279042	0.0214908	0.188578	0.230611
Bcin12g04700.1	0.237411	0.000343964			0.111734	0.489248	0.376262	0.00177834	0.11172	0.508929
Bcin09g04720.1	0.237252	0.000347723			-0.0253798	0.902852	0.144778	0.249159	0.00969886	0.967064
Bcin07g02650.1	0.237246	0.000347723			0.294967	0.0286883	0.231593	0.0582598	0.238985	0.113937
Bcin08g05040.1	0.23717	0.000349426			0.245456	0.0772404	0.204273	0.0966015	0.11994	0.474452
Bcin12g02780.1	0.237153	0.000349624			0.236883	0.0904507	0.157244	0.209258	0.265328	0.0733705
Bcin14g03930.1	0.237139	0.000349717			0.162439	0.277732	0.272694	0.0247801	0.169506	0.286717
Bcin03g02410.1	0.237062	0.00035147			0.203961	0.156542	0.343597	0.00443854	0.229924	0.130254
Bcin11g04130.1	0.236982	0.000353323	urea hydro-lyase cyanamide hydratase [Botrytis cinerea T4]	F:lyase activity	0.319791	0.0162613	0.174227	0.160215	0.414853	0.00197122
Bcin01g06080.1	0.236892	0.000355439			0.399986	0.0018336	0.4363	0.000262699	0.164514	0.304578
Bcin12g06650.1	0.236834	0.00035671			0.10643	0.515555	0.378025	0.00169003	0.113022	0.50316
Bcin15g00810.1	0.236821	0.000356792			0.207054	0.149156	0.315464	0.00902056	0.0515464	0.78851
Bcin13g01300.1	0.236706	0.000359601			0.0350109	0.863998	0.445903	0.000192531	0.242146	0.108785
Bcin03g06590.1	0.236621	0.000361631			0.282067	0.0376692	0.175203	0.157718	0.152957	0.344332
Bcin16g01110.1	0.236499	0.000364478			0.123698	0.435321	0.19277	0.117968	0.117675	0.483096
Bcin11g05390.1	0.236496	0.000364478	hypothetical protein BC1G_15020 [Botrytis cinerea B05.10]	no GO terms	0.270347	0.0477829	0.0747694	0.568078	0.135364	0.410334
Bcin09g02700.1	0.236351	0.000367897			0.349742	0.00772587	0.181593	0.142522	0.310798	0.0307158
Bcin02g03630.1	0.236092	0.000374737			0.193625	0.183824	0.206267	0.0931704	0.0693163	0.701965
Bcin03g02470.1	0.23605	0.000375385			0.337412	0.0105601	0.120632	0.34132	0.143394	0.379581
Bcin01g06660.1	0.236008	0.000376274			0.100217	0.545525	0.221419	0.0707477	0.271514	0.0657787
Bcin14g04110.1	0.235887	0.000379411	stress response RCI peptide [Botrytis cinerea T4]	C:integral component of membrane	0.359007	0.00614625	0.206633	0.0925761	0.122002	0.465809
Bcin01g03270.1	0.235774	0.000382316	oxidoreductase - [Botrytis cinerea 1]	no GO terms	0.212507	0.136361	0.354449	0.00332266	0.254992	0.0857415
Bcin06g03820.1	0.23563	0.000386164			0.343787	0.00893382	0.280982	0.0204941	0.218299	0.154398
Bcin16g04730.1	0.235618	0.000386225			0.101899	0.537731	0.137249	0.276203	-0.0101329	0.965201
Bcin01g04280.1	0.235453	0.000390692			0.211422	0.1391	0.301248	0.0128523	-0.0165762	0.941411
Bcin06g05230.1	0.235403	0.000391848	transcription factor Cys6 [Botrytis cinerea T4]	C:nucleus; F:zinc ion binding; F:RNA polymerase II transcription factor activity, sequence-specific DNA binding; P:regulation of transcription from RNA polymerase II promoter	0.400014	0.0018336	0.427808	0.000337414	0.324444	0.0232274
Bcin09g00620.1	0.235322	0.000393917			0.146609	0.338111	0.335947	0.00538431	0.332149	0.019461
Bcin02g02960.2	0.235215	0.000396764			0.127143	0.421478	0.24471	0.0449212	0.0909929	0.600632
Bcin05g00060.1	0.235165	0.000397967			-0.0239419	0.909253	0.268245	0.0273391	0.474919	0.000229997
Bcin10g03180.1	0.235111	0.000398956			0.425502	0.000760848	0.33474	0.00557888	0.310418	0.0310237
Bcin11g02350.1	0.234979	0.000402306	ribosomal RNA-processing [Botrytis cinerea T4]	P:rRNA processing; C:preribosome, small subunit precursor	-0.0167254	0.937904	0.352916	0.00346876	0.199756	0.197924
Bcin02g06270.1	0.234942	0.000403106	phosphoglycerate mutase	C:cytoplasm; F:metal ion binding; F:catalytic activity; P:metabolic process; F:phosphoglycerate mutase activity; F:manganese ion binding; P:glucose catabolic process	0.257162	0.0617584	0.45175	0.000158459	0.378649	0.00585464
Bcin09g05570.1	0.234927	0.000403261	MFS sugar transporter [Botrytis cinerea T4]	F:substrate-specific transmembrane transporter activity; P:transmembrane transport; C:integral component of membrane; P:carbohydrate transport	0.0096853	0.968043	0.12968	0.305282	-0.0447233	0.81892
Bcin06g07110.1	0.234831	0.00040568			0.441291	0.0004469	0.295822	0.0146045	0.395985	0.00366049
Bcin02g05890.1	0.234826	0.00040568			0.443258	0.000433477	0.448616	0.000176441	0.333776	0.0188774
Bcin07g03310.2	0.234809	0.000405912			0.190545	0.191594	0.137127	0.276662	0.161164	0.315776
Bcin05g06720.1	0.234569	0.000412887			0.165884	0.267702	0.322952	0.00754552	0.0275095	0.892535
Bcin09g04050.1	0.234507	0.000414476			0.22481	0.111959	0.313673	0.00943458	0.241237	0.11082
Bcin01g03210.1	0.234146	0.000425375			0.211422	0.1391	0.47561	6.34223e-05	0.181403	0.250303
Bcin01g02630.1	0.234062	0.00042769			0.389257	0.00261966	0.225258	0.0656466	0.112141	0.507913
Bcin03g01750.1	0.234048	0.00042783			0.284468	0.035779	0.281715	0.0201564	0.150719	0.353033
Bcin07g07100.1	0.234038	0.00042783			0.213985	0.133523	0.337615	0.00517579	0.183899	0.243793
Bcin10g00840.1	0.233979	0.000429377			0.201302	0.16232	0.28143	0.0202889	0.168991	0.289017
Bcin12g02000.1	0.233947	0.000430092			0.220307	0.120573	0.277754	0.0221676	0.107935	0.524675
Bcin14g02510.1	0.233937	0.000430092			0.445496	0.000394115	0.149973	0.231463	0.277889	0.0588227
Bcin12g02900.1	0.233879	0.000431632			0.232583	0.0973237	0.272301	0.025013	0.109523	0.517638
Bcin05g06050.1	0.233802	0.000433786			0.218611	0.123884	-0.0517634	0.700296	0.114026	0.498371
Bcin07g06910.1	0.233757	0.000434904			0.12637	0.425103	0.11819	0.351152	0.0168475	0.939942
Bcin09g00210.1	0.233742	0.000435073			0.0334509	0.871251	0.23923	0.0502756	0.338673	0.0168095
Bcin03g07440.1	0.233661	0.000437357			0.284021	0.0360961	0.360757	0.00277732	0.302265	0.0368221
Bcin02g07430.1	0.233383	0.000446089			0.206959	0.149333	0.14216	0.25799	0.245103	0.102875
Bcin11g02840.1	0.233297	0.000448594			0.280928	0.0385493	0.314948	0.00913079	0.218706	0.153727
Bcin05g00180.1	0.233275	0.000449	hypothetical protein BofuT4P114000012001	F:ATP binding	0.0771026	0.660699	0.36526	0.00245549	0.229476	0.131473
Bcin09g02770.1	0.233245	0.000449433			0.0552496	0.767034	0.196527	0.110317	0.00865437	0.970334
Bcin12g00770.1	0.233242	0.000449433	phospholipase d p1	F:catalytic activity	0.273318	0.0454505	0.177347	0.152649	0.135676	0.408967
Bcin05g08110.1	0.233195	0.000450655			0.215477	0.130428	-0.0246066	0.860447	0.0399891	0.838157
Bcin02g05720.1	0.233174	0.000451031			0.172925	0.244489	0.0629816	0.635702	0.128283	0.440322
Bcin16g03500.1	0.233135	0.000452007			0.126343	0.425119	0.120496	0.341917	0.179042	0.257099
Bcin11g05620.1	0.233106	0.000452651			0.345605	0.00849976	0.187561	0.128653	0.249295	0.0947761
Bcin17g00010.1	0.233038	0.000454604	hypothetical protein M426DRAFT_320792	F:pyridoxal phosphate binding; F:catalytic activity; P:biosynthetic process	0.0775095	0.658783	0.279327	0.0213676	0.144113	0.378549
Bcin01g09140.1	0.23298	0.00045621			0.175041	0.237243	0.296351	0.0144303	0.0921867	0.595178
Bcin16g01730.1	0.232933	0.000457084			0.172084	0.246869	0.29026	0.0165933	0.226709	0.136877
Bcin12g01470.1	0.232925	0.000457084			0.0196419	0.926691	0.161394	0.196733	0.143448	0.379493
Bcin12g00010.1	0.23288	0.00045826			0.297748	0.0269883	0.273779	0.0242155	0.258532	0.0814353
Bcin08g00700.1	0.232835	0.000459456			0.0845496	0.623037	0.406633	0.00067713	0.298304	0.0397469
Bcin15g02770.1	0.23282	0.000459619			0.204775	0.154323	0.243218	0.0463856	0.321351	0.0243871
Bcin02g02290.1	0.232724	0.000462555			0.259984	0.0586747	0.166725	0.180965	0.360011	0.00952041
Bcin10g03400.1	0.232659	0.000464355			0.181552	0.217716	0.0864216	0.504725	0.171215	0.28126
Bcin14g01670.1	0.232651	0.000464355			0.213117	0.135058	0.326112	0.00699886	0.362602	0.0088665
Bcin05g00970.1	0.232625	0.000464751			0.304463	0.0232647	0.27462	0.0237608	0.171961	0.279031
Bcin02g08160.1	0.232611	0.000464751	glycoside hydrolase family 5	P:carbohydrate metabolic process; P:metabolic process; F:hydrolase activity, hydrolyzing O-glycosyl compounds; F:hydrolase activity; F:hydrolase activity, acting on glycosyl bonds	0.343448	0.00900022	0.104286	0.414495	0.175298	0.268813
Bcin04g05680.1	0.232611	0.000464751			0.25586	0.0632676	0.245307	0.0443089	0.119438	0.476426
Bcin14g02720.1	0.23248	0.000468661			0.229544	0.103022	0.245876	0.0438269	0.183152	0.245587
Bcin03g07980.1	0.232477	0.000468661			0.330046	0.0124815	0.323901	0.00737874	0.0347531	0.861737
Bcin01g07800.1	0.23245	0.000469244			0.237724	0.0891705	0.121405	0.337872	0.135553	0.409744
Bcin13g00630.1	0.232429	0.000469655			0.17793	0.228457	0.150475	0.229895	0.110269	0.514315
Bcin01g05270.1	0.232402	0.000470201			0.0997694	0.547941	0.331375	0.00613221	0.31545	0.0279057
Bcin16g03880.1	0.232394	0.000470201			0.103242	0.530845	0.296134	0.0145075	0.205711	0.183474
Bcin03g06950.1	0.232305	0.000472922			0.00984807	0.967387	0.258247	0.033815	0.145741	0.371604
Bcin13g00020.1	0.231982	0.000483913			0.0794357	0.648493	0.319438	0.00816175	0.178378	0.258635
Bcin13g04720.1	0.231951	0.000484657			0.148562	0.330498	0.30978	0.0103626	0.124281	0.457611
Bcin09g06830.1	0.231936	0.000484686			0.023847	0.909831	0.0833152	0.521018	0.126302	0.448413
Bcin06g06340.1	0.231931	0.000484686			-0.0961612	0.565707	0.377767	0.00169811	0.156457	0.331429
Bcin02g06490.1	0.23192	0.000484736			0.0898264	0.598365	0.306593	0.0113197	0.324498	0.0232274
Bcin11g00500.1	0.231827	0.000487698			0.202075	0.160359	0.14163	0.26009	-0.0342648	0.863204
Bcin02g08620.1	0.231798	0.000488394			-0.000664677	0.99814	0.444845	0.000199066	0.230412	0.129418
Bcin12g04820.1	0.231767	0.000489163			0.257678	0.0612264	0.412439	0.000572829	0.323291	0.0236776
Bcin02g08340.1	0.231736	0.000489898			0.235038	0.0933793	0.255806	0.0356419	0.0325692	0.870822
Bcin06g05890.1	0.231651	0.000492618			0.368407	0.00475023	0.151085	0.227988	0.248684	0.0959946
Bcin08g05220.1	0.231631	0.000492976	triosephosphate isomerase [Botrytis cinerea T4]	P:gluconeogenesis; P:pentose-phosphate shunt; P:glycolytic process; F:triose-phosphate isomerase activity	0.181118	0.21888	0.343068	0.00448964	0.00499186	0.981891
Bcin14g03590.1	0.231622	0.000492976			0.194615	0.181532	0.0625882	0.637868	0.102035	0.551811
Bcin12g00390.1	0.231607	0.000493155	alcohol dehydrogenase [Botrytis cinerea T4]	F:zinc ion binding; F:oxidoreductase activity; P:oxidation-reduction process	0.324769	0.0142959	0.144154	0.251056	0.167254	0.29476
Bcin03g08680.1	0.231559	0.000494148			0.0854449	0.617975	0.186978	0.13007	0.22443	0.141845
Bcin02g04680.1	0.231551	0.000494148			0.22854	0.104976	0.446867	0.000186598	0.229965	0.130191
Bcin02g05880.1	0.231551	0.000494148			0.268937	0.0490406	0.360743	0.00277732	0.461096	0.000400885
Bcin09g02480.1	0.23153	0.000494546			0.295415	0.0284163	0.313497	0.00946824	0.263334	0.0750828
Bcin14g02700.1	0.231504	0.000495145			0.19433	0.182024	0.293557	0.0153631	0.118258	0.480363
Bcin05g04170.1	0.231463	0.000496308	ribosome assembly Noc2	F:binding	0.0750271	0.671477	0.327727	0.00672698	0.204368	0.186453
Bcin06g00140.1	0.23141	0.000497857			-0.0363131	0.858053	0.457135	0.000129065	0.323494	0.0236401
Bcin12g02340.1	0.231352	0.000499648			0.374471	0.00393831	0.296595	0.0143472	0.143475	0.379493
Bcin15g02620.1	0.231316	0.000500583			0.113904	0.479275	0.372124	0.00200015	0.177984	0.259913
Bcin02g02210.1	0.231194	0.000504708			0.383058	0.00302523	0.280969	0.0204948	0.203866	0.187844
Bcin08g02010.1	0.231134	0.000506597			0.301329	0.0249933	0.070605	0.591919	0.167878	0.292948
Bcin07g01070.1	0.230936	0.000513579			0.00693163	0.97681	0.365857	0.00241238	0.37268	0.00676826
Bcin13g01030.1	0.230925	0.000513636			0.220483	0.120351	0.346392	0.00411908	0.133234	0.419205
Bcin02g08530.1	0.230693	0.000522043			0.226302	0.108954	0.411137	0.000593288	0.208451	0.176799
Bcin15g03410.1	0.230666	0.000522445			0.392444	0.00240406	0.0663863	0.61571	0.137832	0.399202
Bcin15g03340.1	0.230663	0.000522445			0.3301	0.0124815	0.104693	0.412627	0.156918	0.329954
Bcin08g02170.1	0.230446	0.000530386			0.388999	0.00263204	0.425353	0.000368659	0.211761	0.169399
Bcin14g03860.1	0.230435	0.000530446			0.21484	0.131704	0.411652	0.000586527	0.112235	0.507564
Bcin14g01550.1	0.230404	0.000531261			0.427916	0.000690912	0.102075	0.425187	0.175027	0.269715
Bcin08g03110.1	0.230259	0.000536541			0.285784	0.0347572	0.303581	0.0121135	0.0536761	0.777722
Bcin03g06540.1	0.230226	0.000537424			0.0598752	0.743616	0.345551	0.00420782	0.234699	0.122026
Bcin12g05800.1	0.230216	0.000537446			0.303703	0.0237425	0.326234	0.00697646	0.35331	0.0114121
Bcin04g03320.1	0.230135	0.000540201			0.231158	0.0999123	0.310798	0.0101088	-0.0294764	0.885147
Bcin05g05040.1	0.230127	0.000540201			0.224118	0.113357	0.359645	0.00284817	0.209685	0.173973
Bcin12g04420.1	0.230103	0.000540775			0.11834	0.459623	0.161435	0.196647	0.0428378	0.827661
Bcin05g03780.1	0.230063	0.000541961			0.336666	0.0107847	0.300529	0.0130477	0.163918	0.307276
Bcin05g03440.2	0.23001	0.000543665			0.189243	0.195352	0.321107	0.00784928	0.143001	0.381151
Bcin11g04350.1	0.229965	0.000545096			0.101601	0.539246	0.295035	0.0148729	0.04707	0.80972
Bcin13g05080.1	0.229942	0.000545616			0.128133	0.418547	0.0944791	0.463412	0.15643	0.331429
Bcin16g03980.1	0.229839	0.000549348			0.27717	0.0418096	0.430412	0.000315435	0.375353	0.00628268
Bcin14g03630.1	0.229823	0.000549592			0.334495	0.011276	0.442254	0.000217618	0.30331	0.0359373
Bcin09g03360.1	0.229732	0.00055279			0.129965	0.410647	0.161191	0.197269	0.0899349	0.605173
Bcin02g04540.1	0.229724	0.00055279			0.0135106	0.951889	0.227048	0.0636551	0.258261	0.0814353
Bcin10g02970.1	0.229663	0.000554354			0.228351	0.105397	0.213361	0.0820139	0.142716	0.381877
Bcin08g06280.1	0.22966	0.000554354			0.28573	0.0347754	0.200882	0.102344	0.0976804	0.571313
Bcin08g06960.1	0.229657	0.000554354			0.17869	0.226227	0.167241	0.17943	0.352971	0.011497
Bcin05g07920.1	0.229637	0.000554783			-0.0711747	0.690452	0.282094	0.0199888	0.184862	0.241622
Bcin13g01350.1	0.229536	0.000557976			0.0867336	0.612166	0.281348	0.0203167	0.14159	0.385105
Bcin10g03700.1	0.229532	0.000557976			0.448006	0.000367953	0.395754	0.000979616	0.393231	0.00395124
Bcin01g10250.2	0.229529	0.000557976			0.104449	0.525064	0.381416	0.00151367	0.337832	0.0172392
Bcin01g06620.1	0.229515	0.000558184			0.0487792	0.798647	0.248535	0.0414568	0.0512344	0.789606
Bcin13g05760.1	0.229271	0.000567723			0.0823521	0.633264	0.248725	0.0413008	0.380507	0.00549554
Bcin02g03180.1	0.2292	0.00057025			0.0657895	0.717476	0.386394	0.00130173	0.23299	0.124382
Bcin12g02770.1	0.229179	0.000570345			0.108776	0.50349	0.174417	0.159738	0.258275	0.0814353
Bcin03g05920.1	0.229179	0.000570345			-0.0160879	0.940189	0.209428	0.0883851	0.0811584	0.647519
Bcin03g03610.1	0.229155	0.000570953			0.261055	0.0572965	0.324919	0.00720962	0.308058	0.0327277
Bcin06g06130.1	0.229066	0.000574223			-0.0679192	0.706023	0.446989	0.000186003	0.0686788	0.705474
Bcin08g04210.1	0.229018	0.000575593			0.173101	0.243955	0.138171	0.272453	0.231877	0.126407
Bcin09g03090.1	0.229015	0.000575593			0.364772	0.00531347	0.376546	0.00177251	0.359414	0.0097223
Bcin05g04520.1	0.228909	0.000579602	hypothetical protein BofuT4_P137400.1	no GO terms	0.310187	0.0205418	0.147084	0.241139	0.111069	0.511097
Bcin02g06600.1	0.228781	0.00058459			0.0430684	0.826859	0.307908	0.0109155	0.212086	0.168949
Bcin06g06870.1	0.228749	0.000585531			0.208871	0.144775	0.294764	0.0149459	0.212642	0.167161
Bcin10g03230.1	0.22874	0.000585539			0.18124	0.218645	0.286937	0.0178805	0.145578	0.372237
Bcin01g03200.1	0.228567	0.000592503			0.163755	0.274118	0.449579	0.000172269	0.395808	0.00367012
Bcin09g00590.1	0.228521	0.000594036			0.219493	0.122085	0.337629	0.00517579	0.0927157	0.5921
Bcin08g01030.1	0.228486	0.000594849	serologically defined colon cancer antigen 1	no GO terms	0.261123	0.0572177	0.192227	0.119034	0.0710662	0.694019
Bcin11g00990.1	0.228484	0.000594849			0.043611	0.824439	0.334319	0.00563779	0.125746	0.450517
Bcin02g01160.1	0.228421	0.000597123			-0.00648399	0.977984	0.297762	0.0139886	0.230616	0.12912
Bcin07g03570.1	0.228389	0.000598106			0.256579	0.0625004	0.206389	0.0929649	0.0046663	0.983267
Bcin01g08310.1	0.228338	0.000599935			0.0402876	0.838188	0.304965	0.0117801	0.213348	0.165503
Bcin13g02360.1	0.228182	0.00060627			-0.048006	0.802338	0.401207	0.000815525	0.0816061	0.645056
Bcin16g03150.1	0.228171	0.000606367			0.150895	0.321349	0.318964	0.00824055	0.147518	0.364313
Bcin08g03170.1	0.228146	0.000607035			0.0427835	0.828676	0.350054	0.00373888	0.170496	0.283732
Bcin10g03630.1	0.228083	0.000609397			0.103785	0.528097	0.103812	0.416789	-0.000488334	0.998213
Bcin09g06370.1	0.227924	0.000615981			0.301587	0.0248475	0.209061	0.0889568	0.322368	0.0239031
Bcin07g02410.1	0.227763	0.000622744			0.0387954	0.845947	0.144493	0.249866	0.175448	0.268509
Bcin01g02030.1	0.22767	0.000626473			0.262778	0.0554135	0.249729	0.0404305	0.0887954	0.610857
Bcin11g03430.1	0.227632	0.000627773			0.286747	0.0340093	0.250149	0.0400436	0.313985	0.0287055
Bcin04g02420.2	0.227424	0.000636787			0.117363	0.463033	0.322151	0.00767975	0.142811	0.381877
Bcin11g03130.1	0.227246	0.000644529			0.164162	0.273	0.267973	0.0274934	0.29182	0.0450484
Bcin05g07030.1	0.227193	0.000646061			0.132542	0.398617	0.0837358	0.51893	0.208356	0.176958
Bcin01g04720.1	0.227192	0.000646061			0.251682	0.0679105	0.336761	0.00528291	0.451804	0.000554946
Bcin01g00810.1	0.227178	0.000646061			0.109577	0.499953	0.315152	0.00908546	0.0781199	0.662641
Bcin12g05690.1	0.227176	0.000646061	glutathione s-transferase	F:transferase activity	0.477265	0.000121057	0.422518	0.000406392	0.412629	0.00214601
Bcin12g05500.1	0.22707	0.000650576			0.195212	0.179766	0.165518	0.184509	0.378974	0.00582025
Bcin10g05330.1	0.227054	0.000650893	hypothetical protein BcDW1_6414	no GO terms	0.215749	0.129881	0.195903	0.111559	0.100149	0.559385
Bcin12g01370.1	0.226966	0.000654568			0.171392	0.249344	0.160933	0.198126	0.00127509	0.99545
Bcin07g02510.1	0.226952	0.000654769			0.338538	0.0102361	0.439406	0.000237296	0.330209	0.0202631
Bcin04g00640.1	0.226896	0.000656942			0.0737249	0.678261	0.252971	0.037763	0.116698	0.486484
Bcin14g03890.1	0.226887	0.000656942	pyruvate dehydrogenase kinase	P:phosphorylation; F:transferase activity, transferring phosphorus-containing groups; F:kinase activity	0.188511	0.197266	0.182366	0.140823	0.118787	0.478067
Bcin15g02370.1	0.226866	0.000657522			0.232108	0.0981799	0.407583	0.000664572	0.252211	0.0900024
Bcin11g01570.1	0.226848	0.000657938			0.0901519	0.597253	0.217024	0.0770786	0.201723	0.193867
Bcin04g02040.1	0.226831	0.000658283			0.239202	0.0868403	0.23398	0.0556237	0.102944	0.54756
Bcin01g06790.1	0.226766	0.000660928			0.327645	0.0133059	0.133722	0.289361	0.103757	0.543893
Bcin08g05580.1	0.226728	0.000662274			0.202767	0.158752	0.367404	0.00230774	0.243787	0.105359
Bcin03g01850.1	0.226718	0.000662289			0.0411015	0.835508	0.394059	0.00104007	0.293177	0.0439233
Bcin13g04670.1	0.226705	0.000662494			-0.0112046	0.962763	0.403608	0.000752096	0.188877	0.23005
Bcin02g02090.1	0.226668	0.000663382			0.254314	0.0649741	0.393597	0.00105792	0.160635	0.317589
Bcin15g02510.1	0.226653	0.00066366			0.0393245	0.843345	0.278351	0.0218547	0.187656	0.23273
Bcin07g02520.1	0.226625	0.000664535			0.281701	0.037951	0.189921	0.123541	0.174742	0.270684
Bcin05g02650.1	0.226542	0.000668068			0.135526	0.38477	0.243204	0.0463856	0.129951	0.433854
Bcin05g05820.1	0.226506	0.000669061	40S ribosomal S0 [Botrytis cinerea ]	F:structural constituent of ribosome; C:cytosolic small ribosomal subunit; P:ribosomal small subunit assembly; P:translation	0.124959	0.43074	0.345279	0.00423606	0.161191	0.315776
Bcin14g04060.1	0.226502	0.000669061			0.35685	0.00650913	0.105372	0.409267	0.295917	0.0416561
Bcin11g06160.1	0.226429	0.000672007			0.190952	0.190427	0.216169	0.0781461	0.125705	0.450724
Bcin01g00980.1	0.226423	0.000672007	40S ribosomal S2 [Botrytis cinerea ]	F:RNA binding; F:structural constituent of ribosome; C:intracellular ribonucleoprotein complex; C:cytosolic small ribosomal subunit; C:small ribosomal subunit; C:ribosome; P:translation	0.0500271	0.792022	0.30491	0.0117852	0.0916848	0.597212
Bcin05g05790.1	0.226342	0.000675457	nucleolar [Botrytis cinerea ]	C:box C/D snoRNP complex; C:small-subunit processome; C:nucleus; P:endonucleolytic cleavage to generate mature 5'-end of SSU-rRNA from (SSU-rRNA, 5.8S rRNA, LSU-rRNA); C:intracellular ribonucleoprotein complex; P:endonucleolytic cleavage in 5'-ETS of tricistronic rRNA transcript (SSU-rRNA, 5.8S rRNA, LSU-rRNA); P:ribosome biogenesis; P:endonucleolytic cleavage in ITS1 to separate SSU-rRNA from 5.…	0.0888226	0.602745	0.27032	0.026171	0.183125	0.245587
Bcin15g01820.1	0.226276	0.000678193			0.0301953	0.884059	0.30506	0.0117488	0.0163863	0.941889
Bcin14g05540.1	0.226164	0.000683189			0.0416848	0.832313	0.0596039	0.654906	0.158315	0.325759
Bcin14g05420.1	0.226104	0.000685684			0.214962	0.131624	0.387995	0.00125156	0.0972328	0.573372
Bcin01g01990.1	0.226031	0.000688805			0.081796	0.636318	0.351411	0.00359717	0.352686	0.0115881
Bcin04g05720.1	0.225962	0.00069174	hypothetical protein BcDW1_3	C:integral component of membrane	0.398956	0.00190314	0.298576	0.0137236	0.175583	0.268104
Bcin13g02390.1	0.225886	0.000695036			0.124864	0.430958	0.239772	0.049646	0.144845	0.375047
Bcin04g06430.1	0.225763	0.000700699			0.199742	0.166491	-0.021541	0.878537	-0.0591291	0.751714
Bcin12g05530.1	0.225671	0.000704867			0.0693706	0.699176	0.266902	0.0281955	0.131918	0.425376
Bcin01g11310.1	0.225632	0.00070635			0.330182	0.0124812	0.281199	0.0203876	0.113131	0.502506
Bcin05g07290.1	0.225593	0.000707861			0.327008	0.0134704	0.338836	0.00500863	0.165776	0.300333
Bcin05g08370.1	0.22558	0.000708033			0.0244981	0.90677	0.1992	0.105364	0.130507	0.432108
Bcin07g04420.1	0.225527	0.000710233			0.28809	0.0332528	0.223589	0.0679039	0.162873	0.31038
Bcin13g00690.1	0.225496	0.000711109			0.108966	0.502683	0.267973	0.0274934	0.256321	0.0833005
Bcin15g01480.1	0.225487	0.000711109			0.206538	0.150217	0.0848752	0.512559	0.211272	0.170363
Bcin06g01440.1	0.225483	0.000711109			0.0715274	0.688884	0.234984	0.0545516	0.118407	0.479806
Bcin12g04660.1	0.225467	0.000711461			0.0567553	0.760687	0.351058	0.00363838	0.108315	0.522845
Bcin05g04600.1	0.22541	0.000713876			0.0224362	0.915307	0.297219	0.0141635	0.231484	0.127116
Bcin12g06140.1	0.225399	0.000713949	ZIP Zinc transporter [Botrytis cinerea T4]	P:transmembrane transport; C:integral component of membrane; F:metal ion transmembrane transporter activity; P:metal ion transport	0.33653	0.0108247	0.161734	0.195818	0.235296	0.121119
Bcin04g01610.1	0.225386	0.00071415			0.440803	0.000455632	0.257108	0.0346703	0.382108	0.00527991
Bcin13g02650.1	0.225371	0.000714169			-0.0700895	0.695604	0.26834	0.0272905	0.013809	0.951201
Bcin04g02540.1	0.225368	0.000714169			0.34745	0.00820179	0.32401	0.0073587	0.316169	0.0276023
Bcin12g00990.1	0.225327	0.00071575			0.290383	0.0317997	0.161245	0.1972	0.168502	0.290717
Bcin02g00400.1	0.225251	0.000719206			0.0845361	0.62305	0.212493	0.0834854	0.208437	0.176799
Bcin07g05660.1	0.225229	0.000719846			0.0614352	0.737307	0.382881	0.00144291	0.240993	0.111107
Bcin09g01860.1	0.225161	0.000722468			0.0265057	0.898518	0.223996	0.0673207	-0.126289	0.448416
Bcin01g00610.1	0.22516	0.000722468			0.224878	0.111912	0.295076	0.0148596	0.199702	0.198007
Bcin14g00520.1	0.225081	0.000725305			0.289175	0.0325547	0.202415	0.0996391	0.140369	0.39036
Bcin04g05260.1	0.225074	0.000725305			0.115437	0.472633	0.375041	0.00183824	0.0412507	0.834109
Bcin05g05570.1	0.225068	0.000725305			0.213348	0.134564	0.169425	0.172922	0.154517	0.338597
Bcin02g00250.1	0.224951	0.000730887	hypothetical protein BC1G_05520	C:integral component of membrane; F:transferase activity, transferring alkyl or aryl (other than methyl) groups	0.350448	0.00763556	0.384007	0.00140563	0.199308	0.199149
Bcin09g01320.1	0.224871	0.000734595			0.179843	0.222615	0.00784048	0.955768	0.120334	0.472722
Bcin02g04120.1	0.224842	0.000735643			0.181172	0.21888	0.478106	5.7838e-05	0.181701	0.249596
Bcin14g01020.2	0.224806	0.000736588			0.146961	0.337283	0.475746	6.34223e-05	0.332623	0.0192844
Bcin13g05530.1	0.224805	0.000736588			0.218082	0.12501	0.30822	0.0108165	0.136476	0.40518
Bcin02g02230.1	0.224755	0.000738769	predicted protein	no GO terms	0.166942	0.263788	0.0749457	0.567397	-0.0189772	0.931966
Bcin09g05600.1	0.224696	0.00074138	60S ribosomal L30 [Botrytis cinerea ]	F:structural constituent of ribosome; C:ribosome; P:translation	0.0170103	0.937293	0.317282	0.00861556	0.163077	0.30949
Bcin11g05390.2	0.224576	0.000747237	hypothetical protein BC1G_15020 [Botrytis cinerea B05.10]	no GO terms	0.251126	0.0685725	0.133681	0.289519	0.170673	0.282978
Bcin14g03010.1	0.224566	0.000747291	g- beta subunit	F:protein kinase C binding; F:GDP-dissociation inhibitor activity; P:G-protein coupled receptor signaling pathway; C:cytosolic small ribosomal subunit; P:conjugation with cellular fusion; P:invasive growth in response to glucose limitation; F:signal transducer activity; P:regulation of eIF2 alpha phosphorylation by amino acid starvation; P:positive regulation of protein autophosphorylation; F:G-p…	0.100678	0.543974	0.365165	0.00246269	0.139243	0.39395
Bcin10g04280.1	0.224509	0.00074985			0.347328	0.00821483	0.233871	0.0557174	0.06758	0.709695
Bcin10g00590.1	0.224444	0.000752792			0.311462	0.0198408	0.284102	0.0191436	0.275434	0.0609941
Bcin11g00570.1	0.224427	0.000753222			-0.0391346	0.844438	0.46267	0.000105544	0.172192	0.278142
Bcin15g02650.1	0.224302	0.000759464	peroxisomal NADH pyrophosphatase NUDT12 [Botrytis cinerea T4]	F:metal ion binding; F:hydrolase activity	0.47401	0.000132726	0.447748	0.000181659	0.318028	0.0263622
Bcin14g03340.1	0.224283	0.000760006			0.215871	0.129751	0.351804	0.00355645	0.216142	0.159068
Bcin05g05180.1	0.224109	0.000768918			0.202794	0.158752	0.434292	0.000279466	0.358397	0.0100831
Bcin02g03960.1	0.223976	0.000775694	mechanosensitive ion channel [Botrytis cinerea T4]	P:transmembrane transport; F:calcium ion binding; C:membrane; C:integral component of membrane	0.441468	0.0004469	0.216861	0.0773133	0.198576	0.201282
Bcin12g01260.1	0.223958	0.000776058			0.0232773	0.911549	0.24882	0.0412666	0.114419	0.496399
Bcin02g07440.1	0.223951	0.000776058			0.0181633	0.932366	0.178757	0.149278	0.278188	0.05858
Bcin10g04370.1	0.22394	0.000776171			0.206498	0.150306	0.286055	0.0182763	0.311557	0.0304054
Bcin07g06580.1	0.223929	0.000776257			-0.143557	0.350527	0.335893	0.00538804	0.398277	0.00344771
Bcin01g06930.2	0.2239	0.00077739			0.0557922	0.765315	0.294872	0.0149258	0.169628	0.286094
Bcin16g04310.1	0.223857	0.000779245			0.149932	0.325294	0.318272	0.00838708	0.286747	0.0497546
Bcin11g00260.1	0.223839	0.000779747			0.341563	0.00943327	0.389297	0.00120635	0.265817	0.0728277
Bcin01g05060.2	0.223783	0.000782328			0.205779	0.151819	0.442851	0.000211652	0.151682	0.349692
Bcin15g03460.1	0.223703	0.000786282	hypothetical protein BC1G_02985	F:protein binding	0.305453	0.0228216	0.156687	0.210759	0.0535404	0.778581
Bcin05g07040.1	0.223538	0.000795002	glycoside hydrolase family 64 [Botrytis cinerea T4]	F:hydrolase activity	0.257013	0.061952	0.186978	0.13007	0.0970293	0.574439
Bcin16g03440.1	0.223507	0.00079619			0.399566	0.00185711	0.252292	0.0383372	0.30837	0.0324785
Bcin05g00840.1	0.223373	0.000803248			0.359699	0.00604786	0.150515	0.22976	0.0523332	0.784788
Bcin16g00830.1	0.223353	0.000803907			-0.0719343	0.686849	0.349959	0.00374386	0.181633	0.249696
Bcin05g00820.1	0.223251	0.000809194			0.241902	0.0824624	0.0824742	0.525695	0.0332881	0.867517
Bcin11g01980.1	0.223209	0.000811063			0.106457	0.515438	0.257257	0.0345556	0.0169832	0.939371
Bcin09g00370.1	0.223116	0.000815874			0.0841156	0.624547	0.13341	0.290508	0.0892566	0.608392
Bcin05g05350.1	0.223084	0.000817156			0.0588714	0.749028	0.295374	0.0147545	0.28455	0.051774
Bcin16g04340.1	0.223076	0.000817156			0.0744303	0.674507	0.13474	0.285534	0.0907623	0.601739
Bcin14g01010.1	0.22306	0.000817567			0.225719	0.110158	0.115654	0.362223	0.0765464	0.670487
Bcin12g02120.1	0.22286	0.000828599			0.23261	0.0972993	0.28459	0.0189194	0.220252	0.15065
Bcin09g00920.1	0.222817	0.000830598	bzip transcription factor	F:transcription factor activity, sequence-specific DNA binding; P:regulation of transcription, DNA-templated; F:sequence-specific DNA binding	0.308926	0.021055	0.254219	0.0367844	0.114609	0.495498
Bcin15g03690.1	0.222695	0.00083726			0.192268	0.187494	0.315871	0.00892593	0.0973006	0.573333
Bcin05g00900.1	0.222662	0.000838657			0.13866	0.371922	0.147775	0.23885	0.14844	0.360938
Bcin13g01900.1	0.222543	0.000844671			0.0290016	0.889174	0.42717	0.000344479	0.304164	0.0353647
Bcin10g04950.1	0.222542	0.000844671			0.319778	0.0162613	0.253595	0.0373	0.17013	0.284494
Bcin16g02300.1	0.222359	0.000855109			0.107827	0.508289	0.182827	0.139685	0.272409	0.0647552
Bcin01g10100.1	0.222231	0.000861901			0.200393	0.164754	0.46971	8.05553e-05	0.139799	0.392531
Bcin02g01260.1	0.222228	0.000861901	hypothetical protein BC1G_02640	F:oxidoreductase activity, acting on paired donors, with incorporation or reduction of molecular oxygen; F:iron ion binding; P:oxidation-reduction process; F:heme binding	0.442227	0.00044358	0.369221	0.00217359	0.41933	0.00172067
Bcin02g05240.1	0.222203	0.000862881			0.272572	0.0460019	0.179354	0.147838	0.129897	0.433862
Bcin05g04430.1	0.22215	0.000865568	succinate dehydrogenase subunit D [Botrytis cinerea]	C:integral component of membrane; C:mitochondrial envelope	0.169208	0.256234	0.185282	0.133849	-0.0667661	0.713497
Bcin16g00280.1	0.22214	0.000865607			0.203364	0.157454	0.399078	0.000876079	0.224729	0.141359
Bcin08g05600.1	0.222079	0.000868792			0.303025	0.0240765	0.203445	0.098031	0.202062	0.192979
Bcin03g07510.1	0.222058	0.000869505			0.22146	0.118377	0.0390125	0.776445	0.0367607	0.853008
Bcin01g05780.1	0.222029	0.00087074			0.281918	0.0378056	0.362249	0.002671	0.21602	0.159363
Bcin04g03770.1	0.221915	0.000877177			0.113443	0.481094	0.2414	0.0481684	0.102889	0.547595
Bcin09g02890.1	0.221816	0.000882437	malate dehydrogenase [Botrytis cinerea 1]	no GO terms	0.279192	0.0400714	0.282257	0.0199264	0.206063	0.182733
Bcin10g03380.1	0.22181	0.000882437			0.199946	0.165885	0.257623	0.0342605	0.27831	0.0584786
Bcin13g02110.1	0.221803	0.000882437			0.199376	0.167493	0.366576	0.00236505	0.346975	0.0134585
Bcin11g04330.1	0.221787	0.000882882			0.175529	0.235933	0.395062	0.00100139	0.204965	0.185242
Bcin03g05780.1	0.221699	0.000887749	predicted protein		0.113131	0.482621	0.340179	0.00482364	0.0825421	0.64052
Bcin16g04330.1	0.221662	0.00088954			0.0293136	0.887728	0.429748	0.000319141	0.0953066	0.581643
Bcin06g07440.1	0.221643	0.000889594			0.164853	0.270855	0.436001	0.000265039	0.375515	0.00628268
Bcin16g01100.1	0.221549	0.000894382			0.146961	0.337283	0.275258	0.023407	0.0679463	0.708676
Bcin02g08430.1	0.221497	0.000897069			0.162629	0.277129	0.0928785	0.471599	0.111069	0.511097
Bcin01g03110.1	0.221431	0.000900092			0.221541	0.118275	0.180833	0.144223	0.082637	0.640024
Bcin03g08570.1	0.221401	0.000901433	hypothetical protein BC1G_06687	F:oxidoreductase activity; P:oxidation-reduction process	0.301682	0.0248142	0.2164	0.0779499	0.225136	0.140389
Bcin01g03740.1	0.22137	0.00090284			0.143774	0.350124	0.262344	0.0310342	0.278079	0.0586366
Bcin10g01050.2	0.221345	0.000903869			0.2129	0.135508	0.179585	0.14729	0.257583	0.0822049
Bcin14g00960.1	0.221319	0.00090493	ATP-dependent RNA helicase has1 [Botrytis cinerea T4]	F:ATP binding; F:RNA binding; F:helicase activity	0.0777265	0.657451	0.336734	0.00528471	0.348874	0.0126456
Bcin13g03340.1	0.221221	0.000910582			0.165328	0.269385	0.156036	0.212694	0.0044764	0.983684
Bcin13g05830.1	0.221167	0.000913443			0.336164	0.0108404	0.322165	0.00767975	0.306267	0.034018
Bcin12g05950.1	0.221069	0.000919144			0.126044	0.426355	0.169872	0.171739	0.131674	0.426382
Bcin14g04760.1	0.220998	0.000923162			0.168747	0.257788	0.258315	0.03376	0.238212	0.115001
Bcin01g03690.1	0.22098	0.00092376			-0.0173901	0.935691	0.264989	0.029306	0.176262	0.265645
Bcin12g03330.1	0.220919	0.000927148			0.264406	0.0535764	0.0223413	0.873953	-0.143394	0.379581
Bcin11g01190.1	0.220906	0.000927424			0.20255	0.159388	0.135879	0.281137	-0.00866793	0.970334
Bcin05g01880.1	0.220847	0.000930271			0.0573114	0.75735	0.215654	0.0788556	0.0691807	0.702398
Bcin03g04840.1	0.220842	0.000930271			0.172911	0.244489	0.19197	0.119572	0.0545985	0.773888
Bcin16g04750.1	0.220835	0.000930271			-0.112792	0.483627	0.411001	0.00059605	0.221649	0.147375
Bcin01g03150.3	0.220818	0.000930842			0.190491	0.1917	0.175326	0.157378	0.321934	0.0241028
Bcin01g05890.1	0.220767	0.000933601			0.360404	0.00596014	0.536001	4.27764e-06	0.316142	0.0276023
Bcin09g06240.1	0.220608	0.000943372			0.334753	0.0112264	0.320903	0.00789288	0.190152	0.22602
Bcin08g04860.1	0.220517	0.000948784			0.409224	0.00139568	0.403988	0.000742521	0.30137	0.0373715
Bcin01g07590.1	0.220493	0.000949798			0.222056	0.117303	0.43691	0.000258235	0.188104	0.231571
Bcin09g00450.1	0.22041	0.000954709			0.385296	0.00290244	0.250393	0.0398561	0.431023	0.00119015
Bcin08g05160.1	0.220341	0.00095874			0.199688	0.166641	0.222056	0.0698147	0.172708	0.27681
Bcin10g04680.1	0.22033	0.000958926			0.165559	0.268798	0.315871	0.00892593	0.330236	0.0202631
Bcin08g03470.1	0.220301	0.00096022			0.255982	0.0631547	0.436652	0.000260079	0.2836	0.0528238
Bcin03g05870.1	0.220292	0.000960239			0.330819	0.0122357	0.149864	0.231893	0.127509	0.443227
Bcin12g02050.1	0.22023	0.000963854	zinc-binding alcohol dehydrogenase [Botrytis cinerea T4]	NA	0.393258	0.0023256	0.242756	0.0468046	0.223725	0.142828
Bcin02g07010.1	0.220212	0.000964413			0.154585	0.306935	0.194886	0.113481	0.140518	0.38951
Bcin11g03170.1	0.220082	0.000972616			0.267227	0.0508183	0.186584	0.1309	0.238646	0.114291
Bcin13g01570.1	0.219873	0.000986235			-0.0189636	0.929239	0.335988	0.00538431	0.20624	0.182215
Bcin12g01770.1	0.21985	0.000987184			0.387344	0.00274085	0.394194	0.00103522	0.372965	0.00674501
Bcin03g06530.2	0.219775	0.000991758	60s ribosomal l8	C:intracellular ribonucleoprotein complex; P:ribosome biogenesis; C:ribosome	0.0427157	0.828845	0.354083	0.00335327	0.153798	0.341481
Bcin12g00750.1	0.21969	0.000995875			0.0674851	0.708404	0.346093	0.00414477	0.0765464	0.670487
Bcin08g01910.1	0.219689	0.000995875			0.236164	0.0916699	0.202347	0.0997302	0.247029	0.0993172
Bcin14g01060.1	0.21963	0.000999338			0.319059	0.016444	0.273237	0.0245097	0.209414	0.174544
Bcin10g04290.1	0.219594	0.00100116	60S ribosomal L17	F:structural constituent of ribosome; C:large ribosomal subunit; C:ribosome; C:intracellular; P:translation	0.0970564	0.562592	0.318109	0.00840947	0.194235	0.213623
Bcin09g04170.1	0.219557	0.00100261			0.302008	0.0246134	0.183261	0.138634	0.131796	0.426073
Bcin08g01590.1	0.219499	0.00100546			0.164989	0.27056	0.0174308	0.902997	-0.0752984	0.675764
Bcin13g04030.1	0.219422	0.00101022			0.125556	0.42806	0.272653	0.0248016	-0.0304531	0.88056
Bcin03g02140.1	0.219351	0.00101454			0.273264	0.0454637	0.274254	0.0239829	0.172979	0.276153
Bcin08g05840.1	0.21932	0.00101612			0.209428	0.143454	0.350081	0.00373888	0.0907352	0.601863
Bcin13g02500.1	0.219217	0.00102281			0.231728	0.0988776	0.187005	0.13007	0.125977	0.449278
Bcin04g04120.1	0.219147	0.00102711			0.18596	0.204408	0.270673	0.0259416	0.188619	0.230578
Bcin10g00400.1	0.219118	0.00102856			0.112846	0.483627	0.319791	0.00808739	0.350258	0.0122455
Bcin13g00540.1	0.21908	0.00103066			0.173562	0.242471	0.187832	0.128125	0.120619	0.47153
Bcin05g00600.1	0.219004	0.0010355			0.268801	0.0491135	0.207013	0.0919975	0.328744	0.0209943
Bcin04g01490.1	0.218918	0.00104101			0.130236	0.409787	0.162765	0.192896	0.291047	0.0458556
Bcin04g02410.1	0.218887	0.00104262			0.0609604	0.739207	0.292756	0.0157127	0.123508	0.460498
Bcin05g07440.1	0.218787	0.00104926			0.0367065	0.85587	0.294737	0.014946	0.190138	0.22602
Bcin03g06530.1	0.218763	0.00105038	60s ribosomal l8	C:intracellular ribonucleoprotein complex; P:ribosome biogenesis; C:ribosome	0.0707949	0.692198	0.372504	0.00197889	0.226329	0.137671
Bcin11g00550.1	0.218748	0.00105081			0.255222	0.0638055	0.320727	0.00792906	0.21134	0.170164
Bcin09g05090.1	0.218652	0.00105716			-0.00333695	0.989287	0.361069	0.00275595	0.0888226	0.610857
Bcin14g05120.1	0.218593	0.00106086			0.301126	0.0250723	0.239175	0.0503346	0.22325	0.14412
Bcin05g08020.1	0.218529	0.00106494			0.0656403	0.718028	0.3094	0.0104776	0.221541	0.147544
Bcin03g02670.1	0.218507	0.00106586			0.0215003	0.917995	0.391115	0.00114571	0.23284	0.1245
Bcin01g01490.1	0.218492	0.00106637			0.220727	0.119817	0.364026	0.00254585	0.0299647	0.883073
Bcin06g03550.1	0.218469	0.00106743			0.120619	0.448496	0.292037	0.0159585	0.284645	0.051774
Bcin01g11340.1	0.218459	0.0010675			0.226886	0.107857	0.251668	0.0388477	0.304286	0.0353376
Bcin09g01570.1	0.218398	0.00107135			0.167187	0.262924	0.402672	0.00077669	0.172572	0.277291
Bcin06g03210.1	0.21834	0.00107502			0.532393	9.93575e-06	0.410147	0.00061199	0.448521	0.000628868
Bcin13g02430.1	0.218285	0.00107848			0.492132	6.77323e-05	0.536801	4.16987e-06	0.418123	0.00177117
Bcin15g02100.1	0.218171	0.00108631			0.181579	0.217716	0.0953608	0.458994	0.00166848	0.994331
Bcin15g03070.1	0.217955	0.00110119			0.195686	0.178693	0.331593	0.00609127	0.205996	0.182864
Bcin01g10280.1	0.21795	0.00110119			0.221649	0.118101	-0.0227618	0.871298	0.185255	0.240703
Bcin06g05630.1	0.217948	0.00110119			0.159604	0.288693	0.342499	0.00454855	0.000800326	0.996765
Bcin04g02140.1	0.217885	0.00110531			0.207162	0.148945	0.338633	0.00501599	0.21096	0.170847
Bcin07g02790.1	0.217779	0.00111207	NRPS-like enzyme [Botrytis cinerea T4]	F:catalytic activity; P:metabolic process	0.187208	0.200853	0.225258	0.0656466	0.201519	0.194222
Bcin09g04070.1	0.217779	0.00111207			0.192607	0.186611	0.363022	0.00261257	0.286978	0.0496793
Bcin01g04280.2	0.217595	0.00112555			0.113144	0.48261	0.306172	0.011454	0.00888497	0.970008
Bcin16g03300.1	0.217522	0.00113057			0.191685	0.188504	0.22009	0.0726523	0.13923	0.39395
Bcin02g02960.3	0.217458	0.00113384			0.0996473	0.548433	0.143407	0.253799	0.135499	0.40994
Bcin01g05060.1	0.217454	0.00113384			0.256796	0.0622313	0.371229	0.0020368	0.188497	0.230764
Bcin14g03450.1	0.217368	0.00113987			0.107705	0.508669	0.272965	0.02464	0.149308	0.357792
Bcin04g03680.1	0.217345	0.00114101			0.248494	0.0720613	-0.0299512	0.828173	-0.0583017	0.75591
Bcin01g02640.1	0.217235	0.00114898			0.165423	0.269091	0.419655	0.000449953	0.0755155	0.675043
Bcin12g01240.1	0.217207	0.00115052			0.050841	0.787956	0.0776858	0.551964	-0.0233451	0.909568
Bcin07g04780.1	0.217172	0.00115258			0.280738	0.0386933	0.181918	0.141814	0.116454	0.487783
Bcin15g01550.1	0.217059	0.00116086			0.000298426	0.999454	0.208383	0.0897511	0.182651	0.246701
Bcin02g02140.1	0.217042	0.00116122			0.267024	0.0509534	0.239623	0.0498174	0.19197	0.220246
Bcin08g03210.1	0.217038	0.00116122	mitochondrial 54S ribosomal 35 [Botrytis cinerea ]	C:ribosome	-0.0255562	0.902568	0.24064	0.0488444	-0.0044764	0.983684
Bcin06g06690.1	0.216833	0.00117691			0.0158844	0.94153	0.327577	0.00675523	0.322463	0.0238652
Bcin01g09520.1	0.216792	0.0011795			0.203568	0.157208	0.127143	0.314953	0.0646772	0.72426
Bcin10g01520.1	0.216737	0.00118299			0.0358247	0.860176	0.246392	0.0433502	0.156036	0.33254
Bcin07g01620.1	0.216732	0.00118299			0.121609	0.444259	0.255738	0.0356429	0.219615	0.151808
Bcin04g03970.1	0.21666	0.00118792			0.271541	0.0468894	0.429965	0.000318446	0.31682	0.0272725
Bcin09g05590.1	0.216654	0.00118792	60S ribosomal L10 [Botrytis cinerea ]	F:structural constituent of ribosome; C:cytosolic large ribosomal subunit; P:ribosomal large subunit assembly; P:translation	0.212466	0.136361	0.398508	0.000893736	0.161978	0.313661
Bcin06g06660.1	0.216637	0.00118845			0.318733	0.0165612	0.175583	0.156867	0.201451	0.194222
Bcin12g03860.1	0.216631	0.00118845			0.152971	0.313061	0.360648	0.00278297	0.18029	0.253135
Bcin02g08420.1	0.216594	0.00119074			-0.0797884	0.647147	0.353228	0.00342927	0.349756	0.0123963
Bcin03g03630.1	0.216549	0.00119373	xyloglucan-specific endo-beta glucanase precursor [Botrytis cinerea 1]	P:carbohydrate metabolic process; P:polysaccharide catabolic process; P:metabolic process; F:hydrolase activity, hydrolyzing O-glycosyl compounds; F:cellulase activity; F:hydrolase activity, acting on glycosyl bonds; F:hydrolase activity	0.314474	0.0183238	0.204259	0.0966105	0.387968	0.00448384
Bcin08g05080.1	0.216518	0.00119553			0.20662	0.150079	0.17382	0.161296	0.256905	0.0827335
Bcin15g03440.1	0.216503	0.00119607			0.194371	0.182024	0.0474905	0.726412	0.167621	0.293852
Bcin13g01650.1	0.21649	0.00119648			0.383546	0.00301261	0.295822	0.0146045	0.204639	0.185917
Bcin16g03900.1	0.216431	0.0012006			0.121229	0.446025	0.329951	0.00637529	0.305711	0.0344629
Bcin11g05930.1	0.216389	0.0012032			0.366088	0.00511321	0.317065	0.00865335	0.296107	0.0416535
Bcin09g00240.1	0.216382	0.0012032			0.191753	0.188348	0.303649	0.0120974	0.130643	0.431599
Bcin07g05070.1	0.216317	0.00120788			0.116196	0.468879	0.374729	0.00185367	0.272504	0.0646913
Bcin04g02120.1	0.216308	0.00120788			0.206145	0.151064	0.260364	0.0323019	0.0218801	0.916909
Bcin04g01600.1	0.216274	0.00121004			0.12968	0.412003	0.325407	0.0071406	0.251085	0.0920276
Bcin15g00170.1	0.216263	0.00121021			0.392146	0.00242887	0.30643	0.01136	0.552971	4.88142e-06
Bcin08g07040.1	0.216208	0.00121363			0.0193977	0.927403	0.43459	0.000276307	0.139419	0.393665
Bcin04g04420.1	0.216205	0.00121363			0.299973	0.025818	0.302198	0.0125215	0.189053	0.229677
Bcin15g02960.1	0.216173	0.00121559			0.0133885	0.952447	0.226587	0.0642284	0.129653	0.434979
Bcin12g01330.1	0.216117	0.00121952			0.237873	0.0889876	0.388361	0.00123562	0.0670917	0.712125
Bcin16g00270.1	0.216101	0.00122011			0.0500136	0.792022	0.280494	0.0207435	0.291603	0.0452763
Bcin05g02330.1	0.216049	0.00122372			0.117933	0.46136	0.250855	0.03955	0.101546	0.553761
Bcin05g03920.1	0.215979	0.00122893			0.136544	0.379735	0.305494	0.0116342	0.152523	0.346232
Bcin01g04710.1	0.215882	0.00123621			0.047599	0.804467	0.366807	0.0023496	0.28497	0.0516571
Bcin02g02940.1	0.215875	0.00123621			0.308464	0.0212715	0.262778	0.0307357	0.394059	0.00388223
Bcin05g01350.1	0.21582	0.00124012			0.178215	0.227762	0.151587	0.226515	0.139487	0.393571
Bcin01g10850.1	0.215783	0.00124255			0.148616	0.330324	0.278568	0.0217518	0.0195469	0.929208
Bcin03g09270.1	0.215671	0.00125135			0.182556	0.214781	0.262032	0.031224	0.211435	0.170094
Bcin01g03590.2	0.215655	0.00125204			0.090898	0.59349	0.264677	0.0295161	0.104504	0.539875
Bcin02g07360.1	0.215641	0.00125247			0.20392	0.156542	0.355358	0.00324049	0.100556	0.557784
Bcin03g03850.1	0.215632	0.00125252			0.147694	0.334094	0.202727	0.0991148	0.25898	0.0808684
Bcin11g05190.1	0.215557	0.00125824	mitochondrial carrier	C:integral component of membrane; P:transport	0.295388	0.0284174	0.106999	0.40175	0.0648535	0.723485
Bcin03g08670.1	0.215529	0.00125993	hypothetical protein BofuT4_P078010.1	F:zinc ion binding	0.191061	0.190149	0.248101	0.0417831	0.0572572	0.761364
Bcin06g07450.1	0.21544	0.00126681			0.165179	0.269898	0.170429	0.170346	0.186069	0.237949
Bcin13g03850.1	0.215323	0.00127621			0.0246066	0.906627	0.309862	0.0103445	0.200475	0.196192
Bcin07g02140.1	0.21531	0.00127665			0.0772518	0.660073	0.245754	0.0439354	0.376316	0.00616752
Bcin14g04670.1	0.215221	0.00128214			0.251302	0.0683807	0.264311	0.0297243	0.320768	0.0246091
Bcin10g01170.1	0.215181	0.00128491			0.278039	0.0409953	0.145564	0.246831	0.200515	0.196173
Bcin01g05730.1	0.215097	0.00129152			0.13284	0.397176	0.414881	0.000533301	0.209929	0.173567
Bcin07g03430.1	0.214914	0.00130649			0.427754	0.000693367	0.296948	0.0142138	0.207298	0.179897
Bcin08g04470.1	0.214904	0.00130649			0.329693	0.0125467	0.237737	0.0517536	-0.0430819	0.826415
Bcin15g04630.2	0.214822	0.00131289	hypothetical protein BC1G_12782	F:nucleic acid binding	0.0496202	0.793392	0.34844	0.00389081	0.305087	0.0348426
Bcin05g05140.1	0.214756	0.00131744			0.172572	0.24523	0.215383	0.079191	0.128039	0.441253
Bcin16g04670.1	0.214754	0.00131744			0.137887	0.374765	0.240423	0.0490893	0.354748	0.0110502
Bcin01g04090.1	0.214666	0.00132452			0.0913456	0.591296	0.339121	0.00497235	0.175529	0.268319
Bcin04g05140.1	0.214412	0.00134677			0.0109197	0.964084	0.392499	0.00109663	0.0775502	0.665749
Bcin10g02510.1	0.214403	0.00134683			0.0468801	0.808222	0.408749	0.000639169	0.264135	0.0743312
Bcin03g05800.1	0.214262	0.00135904			0.294113	0.0292018	0.283207	0.0195649	0.105928	0.534039
Bcin05g00710.1	0.214251	0.00135924			0.110133	0.497366	0.286042	0.0182763	0.257406	0.0823051
Bcin07g03050.1	0.214192	0.00136392			0.405874	0.00154244	0.119154	0.346846	0.205073	0.18508
Bcin05g01740.1	0.214117	0.00137004	acetylserotonin methytransferase (ASMTL) [Botrytis cinerea T4]	C:cytoplasm; F:transferase activity	0.406972	0.0015082	0.315857	0.00892593	0.229341	0.131784
Bcin14g04390.1	0.214109	0.00137004			0.115369	0.473049	0.136191	0.280014	0.108342	0.522829
Bcin09g01060.1	0.214089	0.00137112			0.112982	0.483195	0.347111	0.00402562	0.0801275	0.65303
Bcin13g00680.2	0.214029	0.00137476			0.0851601	0.61937	0.481253	4.95049e-05	0.220198	0.150668
Bcin03g06960.1	0.214024	0.00137476			0.172368	0.245913	0.251031	0.0394155	0.237588	0.116057
Bcin13g03510.1	0.214024	0.00137476			0.104544	0.524711	0.31914	0.008221	0.356335	0.010615
Bcin15g01320.1	0.213948	0.00138109			0.129056	0.414976	0.156403	0.211653	0.129748	0.434768
Bcin16g03800.1	0.213934	0.00138167	conserved hypothetical protein	no GO terms	0.243326	0.0803843	0.261584	0.0315497	0.0331525	0.867697
Bcin11g04320.1	0.213914	0.00138208			0.210079	0.141919	0.193652	0.116105	0.187208	0.234487
Bcin12g01460.1	0.213912	0.00138208			0.163795	0.274116	0.185648	0.132978	0.0833424	0.636973
Bcin02g05460.1	0.213896	0.00138285			0.383044	0.00302523	0.0836272	0.519406	0.121717	0.467388
Bcin07g03760.1	0.213741	0.00139664			0.166007	0.267338	0.193733	0.115956	0.105765	0.534744
Bcin05g01040.1	0.213724	0.00139741			0.272043	0.0464313	0.124525	0.325092	0.264053	0.0743836
Bcin02g00880.1	0.213693	0.00139952			0.142689	0.354109	0.151994	0.225098	-0.0257868	0.899976
Bcin11g03190.1	0.21365	0.00140282			0.322626	0.0151013	0.354192	0.00334827	0.101804	0.552573
Bcin12g05780.1	0.213615	0.00140485			0.363999	0.00541599	0.438795	0.000243456	0.256769	0.082866
Bcin03g03650.1	0.213612	0.00140485			0.262642	0.0555328	0.383152	0.00143787	0.277713	0.0589643
Bcin07g06830.1	0.213589	0.00140621			0.136015	0.382172	0.20837	0.0897511	0.1863	0.237453
Bcin09g02160.1	0.213556	0.00140861			0.263565	0.0544813	0.227252	0.0634556	0.182718	0.246624
Bcin15g02020.1	0.213386	0.00142321			0.200326	0.164897	0.0434617	0.749804	0.267634	0.0707918
Bcin01g08190.1	0.213378	0.00142321			-0.0309007	0.881224	0.217187	0.0767879	0.134048	0.416128
Bcin07g04950.1	0.213222	0.0014364			0.390437	0.00255894	0.153581	0.220203	0.127292	0.443473
Bcin02g05500.1	0.213216	0.0014364			0.0882528	0.605768	0.337588	0.00517753	0.0518041	0.787129
Bcin05g00080.1	0.213068	0.00144999			0.0445469	0.819907	0.204124	0.0968315	0.0190857	0.931394
Bcin01g03130.1	0.213001	0.00145572			-0.00708085	0.976273	0.305779	0.0115618	-0.00398806	0.984933
Bcin16g04040.1	0.212982	0.00145677			0.190708	0.191084	0.0941129	0.464858	0.0401519	0.837656
Bcin07g05090.1	0.212933	0.00146062			0.0119371	0.959336	0.283437	0.0194392	-0.0185703	0.933259
Bcin09g01450.1	0.212926	0.00146062			0.246053	0.0763325	0.128825	0.308614	0.176112	0.266123
Bcin05g05060.1	0.212908	0.00146158			0.440301	0.000462257	0.255141	0.0360026	0.331186	0.0197887
Bcin03g07970.1	0.21289	0.00146254			0.294493	0.0290131	0.417851	0.000476077	0.307474	0.0331332
Bcin07g04300.1	0.212802	0.00147044			0.204124	0.156249	0.312697	0.00968896	0.339175	0.0166092
Bcin14g02780.1	0.212724	0.00147734			0.0193842	0.927403	0.301546	0.0127548	0.172314	0.277699
Bcin04g01720.1	0.212654	0.00148314			0.175448	0.236128	0.193218	0.117035	0.0906267	0.602361
Bcin13g02090.1	0.212649	0.00148314			0.0328133	0.874754	-0.0481281	0.722511	-0.0183939	0.933953
Bcin09g03150.1	0.212614	0.00148577			0.0772789	0.660073	0.225773	0.0651566	0.282013	0.0545704
Bcin13g01420.1	0.212588	0.0014876			0.114474	0.476368	0.441617	0.000222276	0.103961	0.542952
Bcin04g04280.1	0.212559	0.00148964	hypothetical protein BcDW1_2744	no GO terms	0.275597	0.0431181	0.0515464	0.701466	0.0462832	0.813195
Bcin09g05630.1	0.212514	0.00149334			0.147382	0.335626	0.349457	0.00379676	0.0647857	0.72353
Bcin02g02270.1	0.212503	0.00149362			0.214067	0.133372	0.202062	0.100238	0.14787	0.36345
Bcin11g00140.1	0.212491	0.00149395			0.185784	0.204938	0.260445	0.0322576	0.110336	0.5142
Bcin04g00160.1	0.212463	0.00149594	hypothetical protein BC1G_13195	no GO terms	0.314026	0.0185146	0.152442	0.223651	0.243489	0.105935
Bcin13g01450.1	0.212421	0.00149935	hypothetical protein BC1G_04317	no GO terms	0.347029	0.00828416	0.197409	0.10868	-0.0256782	0.900236
Bcin01g08280.1	0.212391	0.00150151	phosphoribosylglycinamide formyltransferase	F:phosphoribosylglycinamide formyltransferase activity; P:'de novo' IMP biosynthetic process; P:biosynthetic process; F:transferase activity; F:hydroxymethyl-, formyl- and related transferase activity	-0.0398399	0.840998	0.305399	0.0116659	0.171161	0.281405
Bcin16g00710.1	0.212351	0.00150466	eukaryotic peptide chain release factor gtp-binding subunit [Botrytis cinerea 1]	F:GTP binding; P:translational termination; F:translation release factor activity; F:GTPase activity; P:nuclear-transcribed mRNA catabolic process, deadenylation-dependent decay	0.0640396	0.725649	0.419778	0.000449365	0.124471	0.456868
Bcin08g03960.1	0.212344	0.00150466			0.195429	0.17925	0.17287	0.1639	0.122016	0.465809
Bcin02g01910.1	0.212261	0.00151221			0.179246	0.224446	0.288592	0.0172791	0.31248	0.0297544
Bcin07g04370.1	0.212192	0.00151815			0.0712018	0.690323	0.336666	0.00529457	0.345985	0.0138769
Bcin03g05480.1	0.212186	0.00151815	hypothetical protein BcDW1_580	no GO terms	0.28771	0.0334997	0.0663456	0.615856	0.0091834	0.968701
Bcin13g00840.1	0.21214	0.00152202			0.288361	0.0330963	0.379056	0.0016366	0.211137	0.170584
Bcin15g04360.1	0.21209	0.00152504			0.128405	0.417165	0.242051	0.047531	0.0915627	0.598037
Bcin05g06340.1	0.212087	0.00152504			0.271392	0.0469641	0.121975	0.335972	-0.0673359	0.710869
Bcin14g05550.1	0.212085	0.00152504			0.26876	0.0491302	0.197558	0.108451	0.292553	0.0443132
Bcin03g07930.1	0.212044	0.00152846			0.0604449	0.740906	0.226777	0.0640163	0.252333	0.0899268
Bcin04g06510.1	0.21203	0.00152906			0.475244	0.000128841	0.432108	0.000300116	0.419859	0.00168986
Bcin05g02530.1	0.211917	0.00153984			0.200122	0.165384	0.232393	0.0574384	0.229558	0.131346
Bcin16g02170.1	0.211878	0.00154298			0.163497	0.275234	0.27854	0.0217518	0.295171	0.0421762
Bcin07g03950.1	0.211814	0.00154841			-0.109116	0.501908	0.343964	0.00439615	0.149891	0.355876
Bcin03g02240.1	0.211809	0.00154841			0.0458356	0.813499	0.416603	0.000497773	0.265383	0.073321
Bcin06g06940.1	0.211713	0.00155753			0.158356	0.293291	0.260174	0.0324375	0.191576	0.221522
Bcin05g04490.1	0.211704	0.00155767			0.350895	0.00757331	0.183641	0.137696	0.307379	0.0331453
Bcin11g02310.1	0.211581	0.00156963			0.128093	0.418746	0.0360011	0.793378	0.169927	0.285151
Bcin13g01950.1	0.211556	0.00157136			0.166291	0.266175	0.232108	0.0576503	0.132854	0.42099
Bcin01g03030.1	0.211539	0.00157235			0.179707	0.222925	0.350014	0.0037389	0.192607	0.218346
Bcin09g04730.1	0.211495	0.00157614			0.274213	0.0445456	0.322789	0.007572	0.227415	0.13555
Bcin13g05820.1	0.211427	0.00158238			0.108152	0.506617	0.203676	0.0976342	0.0460391	0.814022
Bcin02g02300.1	0.211398	0.00158371			0.122341	0.440911	0.43847	0.000245021	0.271663	0.0656742
Bcin02g08260.1	0.211394	0.00158371	EIF3E_BOTFB, Eukaryotic translation initiation factor 3 subunit E	F:translation initiation factor activity; P:formation of translation preinitiation complex; C:cytoplasm; C:eukaryotic 43S preinitiation complex; C:eukaryotic 48S preinitiation complex; P:regulation of translational initiation; P:translational initiation; C:eukaryotic translation initiation factor 3 complex; P:translation	-0.0234672	0.911054	0.255779	0.0356429	0.0917933	0.596819
Bcin03g02010.1	0.21139	0.00158371			0.00385241	0.98772	0.133058	0.291909	-0.0348345	0.861258
Bcin08g07080.1	0.211322	0.00159004			0.221527	0.118275	0.126139	0.318646	0.215138	0.161579
Bcin12g01500.1	0.211311	0.0015904			0.105792	0.518191	0.254598	0.0364473	0.203283	0.189606
Bcin04g04160.1	0.211281	0.00159268			0.311082	0.0200611	0.0334916	0.808071	0.182271	0.247605
Bcin16g00520.1	0.211266	0.00159341			0.479965	0.00011091	0.15742	0.208883	0.137968	0.398532
Bcin01g09430.1	0.211069	0.00161367			0.031484	0.878875	0.176601	0.154501	0.267797	0.0706388
Bcin16g03870.1	0.211059	0.00161382	zinc-binding alcohol dehydrogenase [Botrytis cinerea T4]		0.349132	0.00786923	0.215708	0.0787887	0.268123	0.0702085
Bcin16g05090.1	0.210938	0.00162602			0.339962	0.00986628	0.516522	1.01624e-05	0.240952	0.111107
Bcin02g05920.1	0.210823	0.00163676	aconitate hydratase	F:metal ion binding; P:metabolic process; C:mitochondrion; F:lyase activity; P:tricarboxylic acid cycle; F:4 iron, 4 sulfur cluster binding; F:iron-sulfur cluster binding; F:aconitate hydratase activity	0.358939	0.00614625	0.312168	0.00981684	0.094045	0.587497
Bcin10g04590.1	0.210811	0.00163713	60S ribosomal L12	F:structural constituent of ribosome; C:cytosolic large ribosomal subunit; F:rRNA binding; P:ribosomal large subunit assembly; P:translation	-0.01328	0.952786	0.362697	0.0026424	0.192621	0.218346
Bcin01g11050.1	0.210777	0.00163969			0.182406	0.215273	0.105887	0.407037	0.0931226	0.590967
Bcin15g03290.1	0.210772	0.00163969	actin binding [Botrytis cinerea T4]	F:protein binding; F:actin binding; C:intracellular	0.379381	0.00338072	0.258641	0.0334884	0.177984	0.259913
Bcin16g04160.2	0.210752	0.00164099			0.325651	0.0140133	0.274973	0.0235589	0.0736842	0.681442
Bcin12g03870.1	0.21071	0.00164461			0.251343	0.0683393	0.270293	0.0261736	0.0489419	0.799946
Bcin07g04600.1	0.210659	0.00164934			0.00428649	0.986476	0.349498	0.00379671	0.222084	0.146855
Bcin03g07910.1	0.210606	0.0016543			0.156403	0.300101	0.28847	0.0173107	0.227632	0.135222
Bcin01g06930.1	0.210479	0.00166745			0.0354856	0.861341	0.363863	0.00255557	0.305128	0.0348426
Bcin09g05710.1	0.210453	0.0016694			0.146595	0.338111	0.295768	0.0146175	0.179639	0.254745
Bcin07g02700.1	0.210382	0.00167625			0.388755	0.00264827	0.242173	0.0474149	0.288972	0.047762
Bcin08g06220.1	0.210375	0.00167625			0.352984	0.00719652	0.371595	0.0020239	0.188565	0.230611
Bcin05g02880.1	0.210332	0.00168023			0.0133614	0.95245	0.265165	0.029184	0.276682	0.0598191
Bcin15g04630.1	0.210122	0.00170287	hypothetical protein BC1G_12782	F:nucleic acid binding	0.103608	0.528625	0.354246	0.00334389	0.316712	0.0272844
Bcin07g01630.1	0.210062	0.00170878			0.205643	0.15225	0.395741	0.000979616	0.150136	0.35502
Bcin08g01270.2	0.210003	0.00171407			0.309319	0.0208964	0.19083	0.121754	0.0585187	0.75477
Bcin05g07020.1	0.209999	0.00171407			0.30978	0.0207022	0.2715	0.0254493	0.197409	0.204797
Bcin07g01900.1	0.209969	0.00171652			0.320198	0.0160952	0.244099	0.0455576	0.198915	0.200379
Bcin11g01060.1	0.20995	0.00171685			0.0222463	0.91561	0.215396	0.079191	0.0272653	0.893182
Bcin09g03370.1	0.209911	0.00172039			0.220564	0.120156	0.30373	0.0120759	0.0972056	0.573493
Bcin04g05230.1	0.209894	0.00172142			0.204843	0.15419	0.33006	0.00635404	0.245076	0.102882
Bcin11g06110.3	0.20982	0.00172865			0.180738	0.219598	0.392322	0.00110076	0.238402	0.114635
Bcin15g02340.1	0.209815	0.00172865	translation initiation factor eif4e3 [Botrytis cinerea 1]	F:translation initiation factor activity; F:RNA binding; C:cytoplasm; P:translational initiation; P:translation	0.21404	0.133408	0.0980331	0.44527	0.068516	0.706354
Bcin11g00540.1	0.20971	0.0017398			0.0962697	0.565688	0.269045	0.0268351	0.144954	0.374781
Bcin08g04380.1	0.209688	0.00174142			0.278839	0.04028	0.259835	0.0327145	0.129463	0.435402
Bcin07g04640.1	0.209609	0.00174961			0.284346	0.0358817	0.529259	5.68533e-06	0.304531	0.0351982
Bcin15g02930.1	0.209593	0.00175053			0.290233	0.0318752	-0.0147721	0.918396	0.0147992	0.947694
Bcin15g01290.1	0.209567	0.00175257			0.0779978	0.656278	0.175638	0.15681	0.153228	0.34341
Bcin04g06990.1	0.209447	0.00176562			0.168028	0.26006	0.304422	0.0118774	0.363755	0.00859378
Bcin15g04430.1	0.209412	0.00176874			0.300624	0.0254255	0.210079	0.0872988	0.339053	0.0166092
Bcin06g06630.1	0.209396	0.00176967			0.36233	0.00570091	0.285472	0.0185188	0.252292	0.0899268
Bcin11g05210.1	0.209342	0.00177515			0.200624	0.164107	0.169357	0.173128	0.0537846	0.7771
Bcin11g04700.1	0.209297	0.00177946	hypothetical protein BofuT4_P079340.1	no GO terms	0.122667	0.439451	0.265586	0.028933	0.182176	0.247848
Bcin10g05460.1	0.209264	0.00178242			-0.0194791	0.927369	0.277496	0.0222598	0.107963	0.524559
Bcin15g02430.1	0.20924	0.00178425			0.154151	0.30856	0.20354	0.0979012	0.222667	0.145503
Bcin13g02600.1	0.209213	0.00178645			0.157054	0.297186	0.123833	0.328023	0.111015	0.511105
Bcin07g05260.1	0.209191	0.00178727			0.162181	0.278709	0.0913185	0.479182	0.175814	0.26708
Bcin12g03150.1	0.20919	0.00178727			0.361706	0.00580644	0.233817	0.0557515	0.0402469	0.837656
Bcin10g04910.1	0.20916	0.00178893			0.198589	0.169488	0.337141	0.00523569	0.205507	0.18376
Bcin04g04770.1	0.20915	0.00178917			0.0236164	0.910563	0.270551	0.026009	0.186082	0.237949
Bcin01g06720.1	0.209138	0.00178971			0.302577	0.0243049	0.478907	5.57172e-05	0.200719	0.195722
Bcin06g00260.1	0.209014	0.00180343	heat shock [Botrytis cinerea T4]	F:nucleotide binding; F:ATP binding	-0.0334238	0.871374	0.233329	0.0562732	0.0697368	0.700124
Bcin06g03450.1	0.208941	0.00181124			0.170876	0.251284	0.267268	0.0279685	0.0455643	0.815747
Bcin02g00800.1	0.208869	0.00181889			0.185065	0.206934	0.441061	0.000226058	0.15236	0.346928
Bcin06g00380.1	0.208847	0.00181986	40S ribosomal S11 [Botrytis cinerea ]	F:structural constituent of ribosome; C:ribosome; P:translation	0.057732	0.755191	0.345632	0.00419782	0.151384	0.351094
Bcin02g05960.1	0.208845	0.00181986			-0.121378	0.445119	0.276506	0.022758	-0.0270754	0.894239
Bcin04g00610.1	0.208694	0.00183709			-0.0520076	0.782659	0.267756	0.0276329	0.336693	0.0176815
Bcin10g01250.1	0.208681	0.0018377			0.124986	0.430707	0.281959	0.020058	0.0665084	0.714319
Bcin14g04850.1	0.208667	0.00183837	ribosome biogenesis Nhp2 [Botrytis cinerea ]	F:RNA binding; C:intracellular ribonucleoprotein complex; P:ribosome biogenesis; C:nucleolus	0.0203473	0.92322	0.347735	0.00397498	0.184984	0.241476
Bcin08g04170.1	0.208623	0.00184234	translation initiation factor eIF4B	F:nucleotide binding; F:translation initiation factor activity; P:translational initiation; P:eukaryotic translation initiation factor 4F complex assembly	0.109536	0.499985	0.275638	0.0232145	0.155914	0.332962
Bcin05g04740.1	0.208607	0.00184234			0.234509	0.0943384	0.311991	0.00985644	0.26678	0.071808
Bcin02g03370.1	0.208603	0.00184234			0.232705	0.0971366	0.295781	0.0146175	0.266671	0.0718836
Bcin02g06360.1	0.208541	0.00184883			0.311598	0.019807	0.204151	0.0967917	0.128907	0.437165
Bcin02g01530.1	0.208445	0.00185965			0.113348	0.481719	0.40213	0.000791381	0.145035	0.374609
Bcin13g04140.1	0.208349	0.0018704			-0.00552089	0.981932	0.246934	0.0428204	0.0882528	0.613015
Bcin04g03980.2	0.208299	0.00187561			0.354693	0.00681616	-0.00042051	0.997339	-0.0639447	0.72775
Bcin14g00950.1	0.208265	0.00187885			0.391101	0.0025039	0.266278	0.0285136	0.204368	0.186453
Bcin12g01430.1	0.208168	0.00188996			0.106457	0.515438	0.0883478	0.494421	0.102306	0.550312
Bcin13g04390.1	0.208099	0.00189723			0.199919	0.165931	0.322667	0.00758179	0.167729	0.29347
Bcin09g02810.1	0.208093	0.00189723			0.292648	0.0303191	0.127686	0.313222	-0.00808464	0.971742
Bcin06g07280.1	0.207997	0.00190831	nuclear segregation	no GO terms	0.028337	0.89197	0.335431	0.00546688	0.324512	0.0232274
Bcin06g01420.1	0.207976	0.00190959			0.305033	0.0229734	0.379368	0.0016223	0.306484	0.0338833
Bcin14g04690.1	0.207971	0.00190959			0.239623	0.08618	0.397884	0.000913973	0.0538388	0.776842
Bcin10g01040.1	0.207927	0.00191402			0.137846	0.374951	0.341942	0.00463244	0.264799	0.07376
Bcin04g04360.1	0.20788	0.00191896	aconitate hydratase	F:metal ion binding; P:metabolic process; C:mitochondrion; F:lyase activity; P:tricarboxylic acid cycle; F:4 iron, 4 sulfur cluster binding; F:iron-sulfur cluster binding; F:aconitate hydratase activity	0.00741997	0.975745	0.143584	0.253116	0.0273332	0.892942
Bcin05g04270.1	0.20787	0.00191929			-0.0709984	0.691027	0.20019	0.103585	0.013809	0.951201
Bcin10g03350.1	0.207798	0.0019273			0.294221	0.0291477	0.157366	0.209027	0.192051	0.220035
Bcin12g04500.1	0.207784	0.00192814			0.183356	0.212349	0.156104	0.21251	-0.0617878	0.73904
Bcin16g03490.1	0.207773	0.00192853			0.285377	0.0350584	0.00995659	0.943842	0.301709	0.0371196
Bcin02g08040.1	0.207739	0.00193179			0.273521	0.045306	0.351668	0.00357252	0.158464	0.325265
Bcin01g02020.1	0.207692	0.00193672			0.299878	0.0258762	0.26096	0.0319362	-0.023847	0.907437
Bcin08g04070.1	0.207626	0.00194422	gpi anchored cell wall [Botrytis cinerea 1]	C:integral component of membrane	0.256647	0.0624505	0.188619	0.126287	0.204761	0.185709
Bcin01g09410.1	0.207417	0.00196999			0.250258	0.0695412	0.280819	0.0205743	0.233776	0.12308
Bcin03g05930.1	0.207334	0.0019797			0.406294	0.00153422	0.245619	0.0440605	0.271392	0.0658448
Bcin02g00780.1	0.20731	0.00198186			0.265654	0.0521748	0.208939	0.0891134	0.325041	0.0230243
Bcin03g07460.1	0.207299	0.0019822	60S ribosomal L25 [Botrytis cinerea ]	F:nucleotide binding; F:structural constituent of ribosome; C:ribosome; P:translation	0.129504	0.412886	0.375963	0.00179227	0.201044	0.195279
Bcin03g03350.1	0.207147	0.00200066			0.102279	0.535873	0.2172	0.0767879	0.277564	0.059082
Bcin10g01840.1	0.207142	0.00200066	epoxide hydrolase	F:catalytic activity; F:hydrolase activity	0.388063	0.00268504	0.328608	0.00659158	0.481389	0.00018019
Bcin02g09170.1	0.207046	0.00201111			0.0684617	0.704216	0.278771	0.0216387	0.248698	0.0959946
Bcin06g00550.1	0.207036	0.00201146	hypothetical protein BC1G_01016 [Botrytis cinerea B05.10]	no GO terms	0.283071	0.0368062	0.489352	3.47196e-05	0.402008	0.00304522
Bcin04g03980.1	0.206939	0.00202322			0.32892	0.0128113	-0.103039	0.420895	-0.0318502	0.873576
Bcin05g02430.1	0.206894	0.00202817			0.0169832	0.937407	0.196527	0.110317	0.259278	0.080525
Bcin11g02580.1	0.206814	0.00203767			0.0688823	0.701918	0.230494	0.0595525	0.217512	0.155782
Bcin04g04510.1	0.206743	0.00204608			0.375529	0.00382674	0.234685	0.0549127	0.217214	0.15644
Bcin10g06010.1	0.206629	0.0020604	telomere and ribosome associated stm1 [Botrytis cinerea 1]	no GO terms	0.146961	0.337283	0.287859	0.0174916	0.160974	0.316494
Bcin03g04690.1	0.206451	0.00208341	hypothetical protein BC1G_00743	no GO terms	0.280955	0.0385448	0.0628459	0.636485	-0.013809	0.951201
Bcin08g06300.1	0.206431	0.00208473			0.316888	0.0173299	0.211639	0.0848498	0.192553	0.218527
Bcin14g04260.1	0.206334	0.00209607	regulated by Bmp1 MAP kinase cascade [Botrytis cinerea T4]	P:phosphorylation; F:kinase activity (signal peptide domain)	0.266834	0.0511215	0.281769	0.020138	0.258397	0.0814353
Bcin12g01040.1	0.206282	0.00210221			0.0413728	0.833597	0.346894	0.00405333	0.281742	0.0546852
Bcin05g04790.1	0.206263	0.00210367			0.0435431	0.82481	0.321256	0.00782984	0.122531	0.463958
Bcin01g03430.1	0.206136	0.002119			-0.0714731	0.689141	0.176519	0.154631	0.162453	0.31177
Bcin01g06800.1	0.206074	0.00212585			-0.0327048	0.875122	0.18615	0.131771	-0.0125203	0.955584
Bcin09g01280.1	0.206071	0.00212585			0.304015	0.0235508	0.228703	0.0617395	0.116983	0.485366
Bcin07g06310.1	0.206058	0.00212657			0.400041	0.0018336	0.198752	0.106282	0.26758	0.0708429
Bcin03g00240.1	0.205965	0.00213832			0.119967	0.451094	0.410553	0.000604537	0.193964	0.214379
Bcin01g00570.1	0.205923	0.00214311			0.0558329	0.765283	0.433939	0.000282542	0.132949	0.420689
Bcin15g04570.1	0.205913	0.00214334			0.305263	0.0229038	0.0332881	0.809028	0.220198	0.150668
Bcin16g03790.1	0.205885	0.00214616			0.111761	0.489248	0.170334	0.170645	0.0127103	0.954587
Bcin12g03140.1	0.205841	0.00215014			0.169845	0.254271	0.0412371	0.763207	0.219533	0.152038
Bcin06g01640.1	0.205829	0.00215079			0.30978	0.0207022	0.329436	0.00646796	0.17013	0.284494
Bcin08g02580.1	0.205813	0.00215161			0.372301	0.00420024	0.186978	0.13007	0.153947	0.341166
Bcin01g01910.1	0.205807	0.00215161			0.355874	0.00662377	0.419913	0.000449365	0.239718	0.113055
Bcin16g02710.1	0.20576	0.00215713			0.120429	0.449163	0.360187	0.00280994	0.148535	0.360879
Bcin11g04960.1	0.205751	0.00215722			0.222355	0.116642	0.187602	0.128591	0.107746	0.525189
Bcin02g09050.1	0.205605	0.00217583			0.378798	0.00344138	0.296432	0.0144047	0.421053	0.00166954
Bcin07g02120.1	0.205604	0.00217583			0.233519	0.0958567	0.313972	0.00936718	0.255643	0.0845459
Bcin11g03570.1	0.205563	0.00218041			0.307651	0.0217438	0.188768	0.126054	0.159007	0.323342
Bcin01g08690.1	0.205543	0.00218215			0.172857	0.244489	0.365003	0.0024744	0.0839935	0.634112
Bcin10g03600.1	0.205464	0.00219232			0.298169	0.0268039	0.0120727	0.932449	0.101139	0.55505
Bcin02g00810.1	0.205402	0.00219821			0.0615437	0.736908	0.197151	0.109181	0.116915	0.485793
Bcin15g05100.1	0.205399	0.00219821			0.122382	0.440795	0.348576	0.00388035	-0.0850787	0.629269
Bcin07g03340.1	0.205387	0.00219888			0.147301	0.33589	0.246785	0.0429333	0.0335594	0.86618
Bcin05g05490.1	0.205358	0.00220178			0.238768	0.0875579	0.327062	0.00684494	0.122314	0.464629
Bcin09g03550.1	0.205306	0.00220814	60S ribosomal L14 [Botrytis cinerea ]	F:structural constituent of ribosome; C:ribosome; P:translation	0.0635513	0.727244	0.34943	0.00379779	0.18341	0.244882
Bcin01g07530.1	0.205248	0.00221539			0.125339	0.428543	0.320157	0.00801429	0.159658	0.321266
Bcin01g01820.1	0.205224	0.00221766			-0.0834645	0.628082	0.313253	0.00952887	0.0914948	0.598182
Bcin02g05260.1	0.205197	0.00222052	coatomer subunit [Botrytis cinerea 1]	C:membrane coat; P:vesicle-mediated transport; C:cytoplasm; C:membrane; P:protein transport; F:structural molecule activity; C:Golgi apparatus; C:Golgi membrane; P:intracellular protein transport; P:transport; C:COPI vesicle coat	0.160838	0.283934	0.247952	0.041881	-0.0260038	0.899456
Bcin05g01220.1	0.205045	0.00224129	predicted protein	no GO terms	0.149674	0.326547	0.077401	0.553418	0.148779	0.36
Bcin10g02130.1	0.20498	0.00224966			0.176112	0.233957	0.138416	0.271456	0.172477	0.277291
Bcin06g00960.1	0.204855	0.00226692			0.10118	0.541229	-0.0329897	0.810552	-0.00188551	0.993718
Bcin10g02720.1	0.204832	0.00226909			0.138009	0.37467	0.384753	0.00137579	0.0728703	0.686144
Bcin04g00540.1	0.204796	0.00227285	60s ribosomal l19 [Botrytis cinerea 1]	F:structural constituent of ribosome; C:intracellular ribonucleoprotein complex; C:ribosome; C:intracellular; P:translation	0.111679	0.489279	0.354327	0.00333594	0.192227	0.219442
Bcin09g02000.1	0.204778	0.00227354			-0.0716224	0.688486	0.295252	0.0147939	0.120198	0.473366
Bcin03g03790.1	0.204715	0.00228173	gpi anchored cell wall [Botrytis cinerea 1]	no GO terms	0.395361	0.00216903	-0.000149213	0.999222	0.294615	0.042628
Bcin06g03360.1	0.204633	0.00229271			-0.0089121	0.970443	0.391915	0.00111446	0.162778	0.310504
Bcin13g05620.1	0.204602	0.00229512			0.337927	0.0104299	0.551167	2.00742e-06	0.24783	0.0977196
Bcin07g02150.1	0.204594	0.00229512			-0.0107298	0.964418	0.152333	0.223974	0.237412	0.116458
Bcin14g01890.1	0.204593	0.00229512			0.242594	0.0813447	0.208288	0.0898427	0.210187	0.172846
Bcin05g02570.1	0.204535	0.00230264			0.309672	0.0207199	0.221107	0.0711855	0.234414	0.122169
Bcin01g02620.1	0.20451	0.00230514			0.22991	0.102463	0.396432	0.000955039	-0.00704015	0.975405
Bcin08g06950.1	0.204458	0.00231179			0.0386191	0.846705	0.237344	0.0521975	0.224525	0.141845
Bcin10g04550.1	0.204434	0.0023143	rRNA methyltransferase NOP1 [Botrytis cinerea ]	F:structural constituent of ribosome; C:cytosolic large ribosomal subunit; F:rRNA binding; P:ribosomal large subunit assembly; P:translation	0.0562127	0.763265	0.277713	0.0221786	0.237113	0.117211
Bcin06g03500.1	0.204411	0.00231652			0.209862	0.142453	0.0635648	0.632667	0.228161	0.134175
Bcin05g05370.1	0.204389	0.00231867	LMBD1_BOTFB ame: Full=Probable lysosomal cobalamin transporter	F:cobalamin binding; C:integral component of membrane; P:transport; C:lysosomal membrane	0.322816	0.0150337	0.216237	0.0781297	0.21385	0.164656
Bcin01g06900.1	0.204283	0.00233227			0.222911	0.11578	0.462575	0.000105544	0.224173	0.142313
Bcin07g00240.1	0.20425	0.00233602			0.2699	0.0481734	0.234672	0.0549127	0.226479	0.137459
Bcin13g02720.1	0.204219	0.00233845			0.0760309	0.665803	0.536557	4.17733e-06	0.224471	0.141845
Bcin08g00070.1	0.20413	0.00235075			-0.0319452	0.877352	0.217363	0.0765851	0.243665	0.105568
Bcin12g05750.1	0.204086	0.00235622			0.0303445	0.883446	0.0127103	0.929168	0.0290152	0.886987
Bcin11g03110.1	0.204064	0.00235832	U1biquitin-specific peptidase [Botrytis cinerea T4]	P:protein deubiquitination; C:membrane; C:integral component of membrane; F:thiol-dependent ubiquitinyl hydrolase activity; P:ubiquitin-dependent protein catabolic process; F:hydrolase activity	0.187737	0.199498	0.173481	0.162091	0.221867	0.147292
Bcin16g04210.1	0.204014	0.00236281			0.285255	0.0351057	0.360743	0.00277732	0.253066	0.0888909
Bcin03g03720.1	0.204012	0.00236281			0.151044	0.320685	0.27188	0.0252789	0.101506	0.553824
Bcin11g06400.1	0.203975	0.00236715			0.120157	0.450156	0.238022	0.0514188	0.200054	0.196974
Bcin12g06730.1	0.203907	0.0023765			0.238049	0.0887838	0.325922	0.00703009	0.252849	0.0892408
Bcin03g07940.1	0.203773	0.00239582			0.0297341	0.885904	0.196066	0.111242	0.0902604	0.604297
Bcin07g05030.1	0.20376	0.00239671			0.328852	0.0128118	-0.0319995	0.815775	-0.12717	0.443988
Bcin15g04320.1	0.203705	0.00240399			0.231091	0.100044	0.297518	0.0140696	0.317241	0.0270025
Bcin01g04540.1	0.203683	0.00240435	G -coupled receptor : Microbial opsin [Botrytis cinerea T4]	F:ion channel activity; P:ion transport; P:ion transmembrane transport; C:membrane; C:integral component of membrane	0.361625	0.00581423	0.249308	0.0408453	0.391617	0.00414
Bcin09g01030.1	0.20368	0.00240435			0.112412	0.485754	0.397179	0.000932741	0.0556294	0.769101
Bcin05g06650.1	0.203529	0.00242655			0.29532	0.0284321	0.185648	0.132978	0.00271297	0.990279
Bcin12g01860.1	0.203488	0.00243186			0.339542	0.00993959	0.10723	0.40081	0.164935	0.302843
Bcin02g03610.1	0.203469	0.00243356			0.0764514	0.664079	0.155277	0.21482	0.118597	0.478738
Bcin01g09400.1	0.203351	0.00245092			0.0713918	0.689527	0.352211	0.00351147	0.177103	0.262393
Bcin13g04700.1	0.203283	0.00246042	putative flavin-nucleotide-binding protein	F:FMN binding; F:oxidoreductase activity; P:oxidation-reduction process	0.0241183	0.908538	0.156877	0.210327	0.0421595	0.830597
Bcin15g01900.1	0.203172	0.00247683			0.406538	0.00152239	0.0684617	0.604045	0.0157352	0.944172
Bcin13g03080.1	0.2031	0.00248715			0.262995	0.0550962	0.255887	0.0355819	0.213958	0.164481
Bcin11g03160.1	0.203089	0.0024876			0.165423	0.269091	0.238565	0.050949	-0.0841834	0.633018
Bcin02g04460.1	0.203075	0.00248869			0.132216	0.400076	0.285228	0.0186322	0.203405	0.189206
Bcin13g01010.1	0.203056	0.0024894			0.356172	0.00656889	0.197558	0.108451	0.22382	0.142828
Bcin08g05000.1	0.203051	0.0024894			0.237154	0.0900474	0.175475	0.15707	0.323087	0.0236776
Bcin10g04990.1	0.203047	0.0024894			0.269262	0.0487535	0.118028	0.351859	0.159265	0.322725
Bcin06g03470.1	0.203024	0.00249186			0.178161	0.227888	0.245374	0.0442655	0.139623	0.393098
Bcin01g03140.1	0.203013	0.0024924			0.015586	0.942996	0.0688416	0.601829	0.284712	0.0517576
Bcin02g00820.1	0.202922	0.00250569			-0.032013	0.876985	0.211422	0.0851555	0.0402469	0.837656
Bcin03g01100.1	0.202891	0.00250955			0.17892	0.225528	0.367377	0.00230774	0.217811	0.155231
Bcin13g04640.1	0.202739	0.00253162	hypothetical protein BC1G_13374	F:oxidoreductase activity	0.402808	0.00166525	0.323128	0.00751986	0.140762	0.38838
Bcin14g05230.1	0.202663	0.00254272			0.110201	0.49694	0.315016	0.00911887	0.363348	0.00865566
Bcin01g04130.1	0.202651	0.00254351			0.100475	0.544338	0.289379	0.0169129	0.126031	0.449167
Bcin14g01630.1	0.202607	0.0025494			0.235201	0.0931095	0.168394	0.175919	0.103568	0.544521
Bcin05g06310.1	0.202587	0.00255142			0.133058	0.396208	0.265016	0.0292926	0.197192	0.20548
Bcin03g07660.1	0.202524	0.00256046			0.0836137	0.627134	0.130399	0.30243	0.0786625	0.660718
Bcin16g04160.1	0.202465	0.00256887			0.272802	0.0458359	0.322002	0.00769425	0.0632257	0.732082
Bcin03g00500.1	0.202419	0.00257522			0.457908	0.000254745	0.446107	0.000191696	0.352496	0.0115996
Bcin09g01830.1	0.202382	0.00258009			0.195985	0.177789	0.200895	0.102334	0.389853	0.0043054
Bcin01g07650.2	0.202198	0.00260939			0.234251	0.0947286	0.21229	0.0837395	-0.00929192	0.968156
Bcin05g01110.1	0.202164	0.00261374			0.258885	0.0601058	0.188361	0.126797	0.134034	0.416128
Bcin02g02560.1	0.202107	0.00262213			0.184346	0.209207	0.202021	0.100289	0.134604	0.413569
Bcin11g01340.1	0.202055	0.00262946			0.217851	0.125522	0.2508	0.0395617	0.194547	0.212985
Bcin13g04040.1	0.202044	0.00263002			0.243218	0.0804893	0.14064	0.263766	0.118869	0.477737
Bcin07g02990.1	0.202024	0.00263219			0.0229381	0.913185	0.419303	0.000455583	0.108098	0.523977
Bcin01g08210.2	0.201983	0.00263785			0.00522246	0.983426	0.28223	0.0199276	0.297531	0.0405076
Bcin07g05110.1	0.201949	0.0026417			-0.0269669	0.896896	0.301953	0.0126123	0.41815	0.00177117
Bcin04g04370.1	0.201944	0.0026417			-0.00580575	0.981194	0.048223	0.722169	0.0910065	0.600621
Bcin02g02770.1	0.201889	0.00264834			0.27892	0.0402361	0.509373	1.42671e-05	0.429368	0.00126915
Bcin04g04000.1	0.201882	0.00264834			0.0113538	0.962427	0.397531	0.000924625	0.117431	0.484181
Bcin06g02370.1	0.201771	0.00266591			0.00843733	0.97218	0.109821	0.388786	0.116712	0.486484
Bcin02g02710.1	0.201758	0.00266692			0.345754	0.00849976	0.211801	0.0845761	-0.148969	0.359206
Bcin09g02540.1	0.201743	0.00266809			0.467485	0.000179473	0.432664	0.000295651	0.239474	0.113466
Bcin08g03520.1	0.201663	0.00267921			0.266644	0.0512515	0.138714	0.270378	0.0141074	0.949966
Bcin04g05270.1	0.201628	0.00268375			0.0819316	0.635583	0.387914	0.00125211	0.293597	0.0436904
Bcin01g06390.1	0.201512	0.0027024			0.352387	0.0072803	0.14026	0.264949	0.0276044	0.89206
Bcin02g04100.1	0.201482	0.00270628			0.132759	0.397474	0.248345	0.0415758	0.167499	0.294306
Bcin05g02240.1	0.201443	0.00271102	similar to receptor-associated protein	C:integral component of membrane; C:endoplasmic reticulum; P:intracellular protein transport	0.32987	0.0124815	0.221297	0.0709294	0.174607	0.271016
Bcin12g01630.1	0.20144	0.00271102			0.0851465	0.61937	0.177374	0.152621	0.0739148	0.680719
Bcin09g00600.1	0.20143	0.00271135			0.246026	0.0763325	0.424932	0.00037395	0.141671	0.385105
Bcin04g05700.1	0.201364	0.00272019	nadp-dependent alcohol dehydrogenase	F:zinc ion binding; F:oxidoreductase activity; P:oxidation-reduction process	0.334414	0.0112916	0.286042	0.0182763	0.289324	0.0475573
Bcin15g03790.1	0.201347	0.00272183			0.0977075	0.559549	0.234482	0.0551283	0.0239284	0.907418
Bcin06g00490.1	0.201273	0.00273336			0.273752	0.0450513	0.109848	0.388681	0.185119	0.240974
Bcin04g00200.1	0.201234	0.00273873			0.509929	3.01549e-05	0.431063	0.000310011	0.43147	0.00117769
Bcin10g01660.1	0.201217	0.00273873			0.1215	0.444591	0.248114	0.0417799	0.18904	0.229677
Bcin03g06990.1	0.201211	0.00273873	40S ribosomal S16 [Botrytis cinerea ]	F:structural constituent of ribosome; C:intracellular ribonucleoprotein complex; C:ribosome; P:translation	0.0980874	0.55756	0.311747	0.00990411	0.141224	0.387076
Bcin06g02340.1	0.201163	0.00274403			0.201289	0.16232	0.369872	0.00213059	0.0492268	0.798974
Bcin03g07720.1	0.201155	0.00274403			0.0897043	0.598461	0.332094	0.0060106	0.189528	0.228334
Bcin10g00420.1	0.201154	0.00274403			0.291658	0.0309088	0.155928	0.213024	0.165695	0.30064
Bcin01g10010.1	0.201151	0.00274403			0.330846	0.0122357	0.141156	0.261731	0.0836544	0.63564
Bcin04g04480.1	0.201066	0.00275749			0.0295442	0.886862	0.132881	0.292564	0.0037032	0.986304
Bcin13g03050.1	0.200958	0.00277519			0.209455	0.143454	0.297111	0.0141824	0.145184	0.374349
Bcin05g08130.1	0.200918	0.00278095			0.0889853	0.602211	0.00786761	0.95566	0.296772	0.0411043
Bcin08g03510.1	0.20091	0.00278112			0.123237	0.437126	0.213388	0.0820139	-0.110147	0.514583
Bcin06g04640.3	0.200887	0.00278332			0.357257	0.00646261	0.107135	0.401214	0.213809	0.164656
Bcin03g00450.1	0.200882	0.00278332			0.346948	0.0082973	0.0570402	0.670047	-0.050095	0.794663
Bcin07g02980.1	0.200726	0.00280969	NADPH dehydrogenase [Botrytis cinerea ]	F:FMN binding; F:oxidoreductase activity; P:oxidation-reduction process	0.357434	0.00644072	0.324607	0.00724943	0.220659	0.149589
[truncated: 7,287 more rows]
