# Supplementary material for: Plant–necrotroph co-transcriptome networks illuminate a metabolic battlefield
Source: eLife. 2019 May 13;8:e44279. doi: 10.7554/eLife.44279 (PMC6557632; doi:10.7554/eLife.44279)
Supplement: Figure 5—source data 1. — Tables of B. cinerea genes identified by B. cinerea gene co-expression networks (GCNs) during 96 isolates infection on Arabidopsis wild-type Col-0, jasmonate insensitive mutant coi1-1, and salicylic acid insensitive mutant npr1-1. [file elife-44279-fig5-data1.xlsx]

## Sheet: F5_SD1_BcNetworkGeneList
Figure 5-source data 1. Gene list of B. cinerea gene co-expression networks. Tables of B. cinerea genes identified by B. cinerea gene co-expression networks (GCNs) during 96 isolates infection on Arabidopsis wild-type Col-0, jasmonate insensitive mutant coi1-1, and salicylic acid insensitive mutant npr1-1.
	Col-0			coi1-1			npr1-1
	Identification	Betweenness Centrality	Degree	Identification	Betweenness Centrality	Degree	Identification	Betweenness Centrality	Degree	Description	GO
Bcin01g00420.1	Vesicle/virulence Net	0.00709501	37	Vesicle/virulence and Translate/growth Net	0.02707	16	Vesicle/virulence Net	0	2	plasma membrane stress response (Ist2) [Botrytis cinerea T4]	C:membrane; C:integral component of membrane
Bcin01g00740.1	Vesicle/virulence Net	0	2	NA	NA	NA	NA	NA	NA	Thioredoxin-like superfamily; hypothetical protein BC1G_14342	no GO terms
Bcin01g01190.1	Vesicle/virulence Net	0	1	NA	NA	NA	NA	NA	NA	aspartic ase [Botrytis cinerea]	F:aspartic-type endopeptidase activity; C:membrane; P:proteolysis; C:integral component of membrane; F:peptidase activity; F:hydrolase activity
Bcin01g02870.1	Vesicle/virulence Net	0.00013275	7	Vesicle/virulence and Translate/growth Net	0	1	NA	NA	NA	hypothetical protein BC1G_11840	F:FMN binding; F:oxidoreductase activity; F:catalytic activity; P:oxidation-reduction process
Bcin01g04240.1	Vesicle/virulence Net	0.00022676	4	NA	NA	NA	NA	NA	NA	hypothetical protein BC1G_12228 [Botrytis cinerea B05.10]	C:membrane; C:integral component of membrane
Bcin01g04670.1	Vesicle/virulence Net	0.00845376	37	Vesicle/virulence and Translate/growth Net	0.00157942	10	Vesicle/virulence Net	0	4	hypothetical protein BC1G_13327	no GO terms
Bcin01g07870.1	Vesicle/virulence Net	1.63e-05	2	Vesicle/virulence and Translate/growth Net	1	2	Vesicle/virulence Net	0	2	hypothetical protein BofuT4_P048690.1	no GO terms
Bcin01g07880.1	Vesicle/virulence Net	0.0241464	30	Vesicle/virulence and Translate/growth Net	0.00033272	5	Vesicle/virulence Net	0.0171717	5	rna recognition domain-containing	F:nucleotide binding; F:nucleic acid binding
Bcin01g07880.2	Vesicle/virulence Net	0.0425964	60	Vesicle/virulence and Translate/growth Net	0.00971611	11	Vesicle/virulence Net	0.0552189	7	RNA recognition motif domain	F:nucleic acid binding
Bcin01g08680.1	Vesicle/virulence Net	5.83e-05	4	NA	NA	NA	NA	NA	NA	RNA binding [Botrytis cinerea T4]	no GO terms
Bcin01g09140.1	Vesicle/virulence Net	0	7	NA	NA	NA	NA	NA	NA	cyclin-dependent kinase complex component	F:protein kinase binding; P:phosphorylation; F:kinase activity; P:regulation of cyclin-dependent protein serine/threonine kinase activity
Bcin01g09650.1	Vesicle/virulence Net	0.00130533	3	Vesicle/virulence and Translate/growth Net	3.55e-06	2	Vesicle/virulence Net	0	1	glucose-6-phosphate 1-dehydrogenase	P:carbohydrate metabolic process; F:NADP binding; P:pentose-phosphate shunt; F:oxidoreductase activity; P:oxidation-reduction process; P:glucose metabolic process; F:glucose-6-phosphate dehydrogenase activity
Bcin01g10700.1	Vesicle/virulence Net	0.00026928	15	NA	NA	NA	NA	NA	NA		P:transmembrane transport; C:integral component of membrane
Bcin01g10710.1	Vesicle/virulence Net	0	2	NA	NA	NA	NA	NA	NA	sodium calcium exchanger	P:transmembrane transport; C:membrane; C:integral component of membrane; P:mRNA catabolic process; C:CCR4-NOT complex
Bcin02g00740.1	Vesicle/virulence Net	6.67e-06	4	Vesicle/virulence and Translate/growth Net	0	2	NA	NA	NA	cation diffusion facilitator	P:cation transport; P:transmembrane transport; P:cation transmembrane transport; C:membrane; C:integral component of membrane; F:cation transmembrane transporter activity
Bcin02g01260.1	Vesicle/virulence Net	0	2	NA	NA	NA	NA	NA	NA	hypothetical protein BC1G_02640	F:oxidoreductase activity, acting on paired donors, with incorporation or reduction of molecular oxygen; F:iron ion binding; P:oxidation-reduction process; F:heme binding
Bcin02g02320.1	Vesicle/virulence Net	0	2	NA	NA	NA	NA	NA	NA	oxidoreductase domain containing [Botrytis cinerea T4]	F:oxidoreductase activity
Bcin02g02850.1	Vesicle/virulence Net	0.0001699	14	NA	NA	NA	NA	NA	NA	phosphotransferase enzyme family	F:transferase activity
Bcin02g02910.1	Vesicle/virulence Net	0.0698532	79	Vesicle/virulence and Translate/growth Net	0.0346606	10	Vesicle/virulence Net	0.550842	4	fggy-family carbohydrate kinase	P:carbohydrate metabolic process; P:phosphorylation; F:phosphotransferase activity, alcohol group as acceptor; F:kinase activity
Bcin02g03660.1	Vesicle/virulence Net	0.00026799	16	NA	NA	NA	Vesicle/virulence Net	0	1	domain containing	C:cytoplasm; F:ATP-dependent NAD(P)H-hydrate dehydratase activity; P:nicotinamide nucleotide metabolic process; F:ADP-dependent NAD(P)H-hydrate dehydratase activity
Bcin02g03950.1	Vesicle/virulence Net	0.00066915	11	Vesicle/virulence and Translate/growth Net	0	2	NA	NA	NA	UBX domain-containing [Botrytis cinerea T4]	F:protein binding
Bcin02g03960.1	Vesicle/virulence Net	0	3	NA	NA	NA	NA	NA	NA	mechanosensitive ion channel [Botrytis cinerea T4]	P:transmembrane transport; F:calcium ion binding; C:membrane; C:integral component of membrane
Bcin02g05920.1	Vesicle/virulence Net	0	3	NA	NA	NA	NA	NA	NA	aconitate hydratase	F:metal ion binding; P:metabolic process; C:mitochondrion; F:lyase activity; P:tricarboxylic acid cycle; F:4 iron, 4 sulfur cluster binding; F:iron-sulfur cluster binding; F:aconitate hydratase activity
Bcin02g06660.1	Vesicle/virulence Net	0.00329008	26	NA	NA	NA	NA	NA	NA	hypothetical protein sscle_12g089460	C:membrane; P:phospholipid biosynthetic process; F:phosphotransferase activity, for other substituted phosphate groups
Bcin02g06870.1	Vesicle/virulence Net	0.00074374	11	Vesicle/virulence and Translate/growth Net	0	2	NA	NA	NA	putative transmembrane protein	C:cellular_component
Bcin02g07210.1	Vesicle/virulence Net	0	1	NA	NA	NA	NA	NA	NA	aldose 1-epimerase	P:carbohydrate metabolic process; F:catalytic activity; F:carbohydrate binding; F:isomerase activity
Bcin02g07890.1	Vesicle/virulence Net	1.87e-05	9	NA	NA	NA	NA	NA	NA	[Botrytis cinerea ]	no GO terms
Bcin02g08160.1	Vesicle/virulence Net	6.59e-05	7	NA	NA	NA	NA	NA	NA	glycoside hydrolase family 5	P:carbohydrate metabolic process; P:metabolic process; F:hydrolase activity, hydrolyzing O-glycosyl compounds; F:hydrolase activity; F:hydrolase activity, acting on glycosyl bonds
Bcin02g08370.1	Vesicle/virulence Net	0	9	NA	NA	NA	NA	NA	NA	tsa family	F:oxidoreductase activity; P:oxidation-reduction process
Bcin02g08590.1	Vesicle/virulence Net	0.0328838	4	Peptidase II Net	0.714286	5	Peptidase II Net	0.5	3	Bcap2; aspartic ase precursor [Botrytis cinerea]	F:aspartic-type endopeptidase activity; P:proteolysis; F:peptidase activity; F:hydrolase activity
Bcin02g08820.1	Vesicle/virulence Net	9.41e-05	8	NA	NA	NA	NA	NA	NA	amino acid transporter [Botrytis cinerea T4]	C:membrane; C:integral component of membrane; F:amino acid transmembrane transporter activity; P:amino acid transmembrane transport
Bcin03g01280.1	Vesicle/virulence Net	0	1	NA	NA	NA	NA	NA	NA	hypothetical protein BC1G_02056	no GO terms
Bcin03g01300.1	Vesicle/virulence Net	0.00660238	26	Vesicle/virulence and Translate/growth Net	0.00098485	5	Unknown Net	0.5	5	hypothetical protein BofuT4_P061350.1	no GO terms
Bcin03g01320.1	Vesicle/virulence Net	0.00711708	33	Vesicle/virulence and Translate/growth Net	0.0217744	6	Unknown Net	0.1	4	hypothetical protein BC1G_02051	no GO terms
Bcin03g01320.2	Vesicle/virulence Net	0.00382352	16	Vesicle/virulence and Translate/growth Net	0.00296731	4	Unknown Net	0	3	hypothetical protein BC1G_02051	no GO terms
Bcin03g01320.3	Vesicle/virulence Net	0.0008307	8	Vesicle/virulence and Translate/growth Net	0.00296731	4	Unknown Net	0	3	hypothetical protein BC1G_02051	no GO terms
Bcin03g01920.1	Vesicle/virulence Net	0	2	NA	NA	NA	NA	NA	NA	peroxisomal catalase [Botrytis cinerea T4]	F:peroxidase activity; P:response to oxidative stress; F:oxidoreductase activity; F:metal ion binding; F:catalase activity; P:cellular oxidant detoxification; P:oxidation-reduction process; F:heme binding; P:hydrogen peroxide catabolic process
Bcin03g02220.1	Vesicle/virulence Net	0.00041991	10	NA	NA	NA	NA	NA	NA	tim-barrel enzyme family [Botrytis cinerea 1]	F:catalytic activity
Bcin03g02680.1	Vesicle/virulence Net	0	3	Vesicle/virulence and Translate/growth Net	0.0724727	15	NA	NA	NA	eukaryotic peptide chain release factor subunit 1	P:translational termination; P:L-phenylalanine biosynthetic process; C:cytoplasm; P:metabolic process; F:amino acid binding; F:prephenate dehydratase activity; F:translation release factor activity, codon specific
Bcin03g03360.1	Vesicle/virulence Net	0.0125696	18	Vesicle/virulence and Translate/growth Net	0.0831649	10	Vesicle/virulence Net	0	2	transaldolase [Botrytis cinerea T4]	P:carbohydrate metabolic process; F:sedoheptulose-7-phosphate:D-glyceraldehyde-3-phosphate glyceronetransferase activity; C:cytoplasm; P:pentose-phosphate shunt; F:catalytic activity; F:transferase activity
Bcin03g03660.1	Vesicle/virulence Net	0.00677343	32	Vesicle/virulence and Translate/growth Net	0.020187	11	NA	NA	NA	transaldolase [Botrytis cinerea T4]	F:nucleic acid binding
Bcin03g04480.1	Vesicle/virulence Net	0.00409751	3	Vesicle/virulence and Translate/growth Net	0	1	Polyketide Net	0.191228	4	oxidoreductase [Botrytis cinerea T4]	no GO terms
Bcin03g04500.1	Vesicle/virulence Net	0.00323365	22	Vesicle/virulence and Translate/growth Net	0	2	NA	NA	NA	ser arg-related nuclear matrix [Botrytis cinerea 1]	no GO terms
Bcin03g04690.1	Vesicle/virulence Net	0.0252091	69	Vesicle/virulence and Translate/growth Net	0.00994971	6	Vesicle/virulence Net	0.505051	3	BcPIO4, hypothetical protein BC1G_00743	no GO terms
Bcin03g05320.1	Vesicle/virulence Net	3.8e-05	12	NA	NA	NA	NA	NA	NA	[Botrytis cinerea ]	no GO terms
Bcin03g05480.1	Vesicle/virulence Net	0.03764	67	Vesicle/virulence and Translate/growth Net	0.144465	30	Vesicle/virulence Net	0.19596	6	hypothetical protein BcDW1_580	no GO terms
Bcin03g06160.1	Vesicle/virulence Net	0	4	NA	NA	NA	NA	NA	NA	ras-related Rab-18	F:GTP binding; P:small GTPase mediated signal transduction; C:intracellular
Bcin03g07250.1	Vesicle/virulence Net	0	1	NA	NA	NA	NA	NA	NA	cullin binding [Botrytis cinerea 1]	F:binding
Bcin03g07370.1	Vesicle/virulence Net	3.01e-06	4	NA	NA	NA	NA	NA	NA	hypothetical protein BC1G_11688 [Botrytis cinerea B05.10]	C:membrane; C:integral component of membrane
Bcin03g07390.1	Vesicle/virulence Net	0.00021256	14	NA	NA	NA	Vesicle/virulence Net	0.111111	3	glucose-repressible gene [Botrytis cinerea ]	no GO terms
Bcin03g08830.1	Vesicle/virulence Net	0.00843476	7	Vesicle/virulence and Translate/growth Net	0	1	Vesicle/virulence Net	0	1	similar to phosphatase	F:protein tyrosine phosphatase activity; P:protein dephosphorylation; F:phosphatase activity; P:dephosphorylation; P:peptidyl-tyrosine dephosphorylation; F:protein tyrosine/serine/threonine phosphatase activity
Bcin03g08830.2	Vesicle/virulence Net	0	1	Vesicle/virulence and Translate/growth Net	0	1	Vesicle/virulence Net	0	1	similar to phosphatase	F:protein tyrosine phosphatase activity; P:protein dephosphorylation; F:phosphatase activity; P:dephosphorylation; P:peptidyl-tyrosine dephosphorylation; F:protein tyrosine/serine/threonine phosphatase activity
Bcin03g09250.1	Vesicle/virulence Net	0	4	NA	NA	NA	NA	NA	NA	kinase [Botrytis cinerea T4]	P:phosphorylation; F:kinase activity
Bcin04g00330.1	Vesicle/virulence Net	9.71e-05	12	Vesicle/virulence and Translate/growth Net	0	1	NA	NA	NA	cholinephosphate cytidylyltransferase	F:nucleotidyltransferase activity; F:catalytic activity; P:biosynthetic process; F:transferase activity
Bcin04g00410.1	Vesicle/virulence Net	0	1	NA	NA	NA	NA	NA	NA	f-box domain-containing [Botrytis cinerea 1]	F:protein binding
Bcin04g00450.1	Vesicle/virulence Net	0.00772164	16	Vesicle/virulence and Translate/growth Net	0	1	NA	NA	NA		F:ubiquitin-protein transferase activity; F:ubiquitin protein ligase activity; F:protein binding; P:ubiquitin-dependent protein catabolic process
Bcin04g01050.1	Vesicle/virulence Net	0.0081113	5	NA	NA	NA	NA	NA	NA		F:protein binding; F:calcium ion binding
Bcin04g01640.1	Vesicle/virulence Net	0.0104022	21	Vesicle/virulence and Translate/growth Net	0.00010895	6	Vesicle/virulence Net	0.139394	4	carbohydrate-binding module family 48	no GO terms
Bcin04g02340.1	Vesicle/virulence Net	0	2	NA	NA	NA	NA	NA	NA	hypothetical protein BC1G_04539 [Botrytis cinerea B05.10]	C:integral component of membrane
Bcin04g02360.1	Vesicle/virulence Net	0.0012321	20	NA	NA	NA	NA	NA	NA	c4-dicarboxylate transporter malic acid transport [Botrytis cinerea 1]	P:transmembrane transport; C:cellular_component
Bcin04g04070.1	Vesicle/virulence Net	0.0205757	51	Vesicle/virulence and Translate/growth Net	0.0235963	2	Vesicle/virulence Net	0.0313131	4	Bcccg2; Homologue of N. crassa clock-controlled gene-2, upf0591 membrane [Botrytis cinerea 1]	C:integral component of membrane
Bcin04g04250.1	Vesicle/virulence Net	0.00163282	21	NA	NA	NA	Vesicle/virulence Net	0	1	[Botrytis cinerea ]	no GO terms
Bcin04g05050.1	Vesicle/virulence Net	0	2	NA	NA	NA	NA	NA	NA	camp-mediated signaling sok1 [Botrytis cinerea 1]	no GO terms
Bcin04g05050.2	Vesicle/virulence Net	0	4	NA	NA	NA	NA	NA	NA	hypothetical protein BofuT4_P098350.1	F:O-acyltransferase activity; C:membrane; C:integral component of membrane
Bcin04g05480.1	Vesicle/virulence Net	0	1	Vesicle/virulence and Translate/growth Net	0	1	Vesicle/virulence Net	0	1	hypothetical protein BC1G_03781 [Botrytis cinerea B05.10]	C:integral component of membrane; C:plasma membrane
Bcin04g05490.1	Vesicle/virulence Net	0.00830936	3	Vesicle/virulence and Translate/growth Net	0.00833384	9	Vesicle/virulence Net	0.0363636	2	tat pathway signal sequence	P:lipid metabolic process; F:phosphoric diester hydrolase activity
Bcin04g05600.1	Vesicle/virulence Net	0	1	NA	NA	NA	NA	NA	NA	IFRD domain-containing [Botrytis cinerea T4]	F:binding
Bcin04g05720.1	Vesicle/virulence Net	1.75e-05	10	Vesicle/virulence and Translate/growth Net	0	2	NA	NA	NA	hypothetical protein BcDW1_3	C:integral component of membrane
Bcin04g06720.1	Vesicle/virulence Net	0	2	NA	NA	NA	NA	NA	NA	serine threonine- kinase ssp1 [Botrytis cinerea T4]	F:ATP binding; F:protein kinase activity; P:protein phosphorylation
Bcin04g06730.1	Vesicle/virulence Net	0.0117829	16	Vesicle/virulence and Translate/growth Net	0.00162561	5	Vesicle/virulence Net	0	1	[Botrytis cinerea ]	no GO terms
Bcin05g00090.1	Vesicle/virulence Net	0	1	Vesicle/virulence and Translate/growth Net	0	1	NA	NA	NA	DED1_BOTFB ame: Full=ATP-dependent RNA helicase ded1	F:translation initiation factor activity; F:ATP binding; C:cytoplasm; F:helicase activity; P:translational initiation
Bcin05g00380.1	Vesicle/virulence Net	0.0285983	57	Vesicle/virulence and Translate/growth Net	0.00012793	3	Vesicle/virulence Net	0	2	beta-flanking [Botrytis cinerea 1]	no GO terms
Bcin05g00680.1	Vesicle/virulence Net	0.00191863	17	NA	NA	NA	Vesicle/virulence Net	0	1		F:phosphorelay sensor kinase activity; F:protein binding; P:signal transduction; P:phosphorelay signal transduction system; F:transferase activity, transferring phosphorus-containing groups; P:phosphorylation
Bcin05g00830.1	Vesicle/virulence Net	0.002577	27	Vesicle/virulence and Translate/growth Net	0.0390333	10	NA	NA	NA	mitochondrial inner membrane 1 [Botrytis cinerea]	C:integral component of membrane
Bcin05g00840.1	Vesicle/virulence Net	0.0253191	58	Vesicle/virulence and Translate/growth Net	0	1	Vesicle/virulence Net	0	1	Bcvps13, Vacuolar protein sorting-associated protein 13, fungi	Autophagy-related, C-terminal, the delivery of proteins to the vacuole in vegetatively growing yeast
Bcin05g01380.1	Vesicle/virulence Net	0.106502	66	Vesicle/virulence and Translate/growth Net	8.88e-06	3	Vesicle/virulence Net	0.0885522	5	NADH-cytochrome b5 reductase [Botrytis cinerea ]	C:integral component of mitochondrial outer membrane; F:cytochrome-b5 reductase activity, acting on NAD(P)H; C:mitochondrial intermembrane space; P:ergosterol biosynthetic process; P:cellular response to oxidative stress; P:oxidation-reduction process
Bcin05g02240.1	Vesicle/virulence Net	0.00033221	15	NA	NA	NA	NA	NA	NA	similar to receptor-associated protein	C:integral component of membrane; C:endoplasmic reticulum; P:intracellular protein transport
Bcin05g03560.1	Vesicle/virulence Net	0.0005287	16	Vesicle/virulence and Translate/growth Net	0	3	Vesicle/virulence Net	0.0020202	3	hypothetical protein BofuT4_P041470.1	no GO terms
Bcin05g04520.1	Vesicle/virulence Net	3.1e-05	5	Vesicle/virulence and Translate/growth Net	0	3	NA	NA	NA	hypothetical protein BofuT4_P137400.1	no GO terms
Bcin05g04730.1	Vesicle/virulence Net	0.0946342	76	Vesicle/virulence and Translate/growth Net	0.0372193	22	Vesicle/virulence Net	0	1	calcium calmodulin-dependent kinase	F:ATP binding; F:protein serine/threonine kinase activity; P:protein phosphorylation
Bcin05g04940.1	Vesicle/virulence Net	0.00542747	22	ATP Net	6.43e-05	4	Unknown Net	0	2	WD40/YVTN repeat-like-containing domain superfamily; [Botrytis cinerea ]	F:protein binding
Bcin05g05370.1	Vesicle/virulence Net	0.00549875	17	Vesicle/virulence and Translate/growth Net	0	1	NA	NA	NA	LMBD1_BOTFB ame: Full=Probable lysosomal cobalamin transporter	F:cobalamin binding; C:integral component of membrane; P:transport; C:lysosomal membrane
Bcin05g05970.1	Vesicle/virulence Net	0	1	Peptidase II Net	0	1	NA	NA	NA	vacuolar atp synthase 98 kda subunit	C:vacuolar proton-transporting V-type ATPase, V0 domain; P:ion transport; P:proton transport; F:hydrogen ion transmembrane transporter activity; P:ATP hydrolysis coupled proton transport; C:membrane; C:integral component of membrane; C:proton-transporting V-type ATPase, V0 domain; P:transport
Bcin05g06000.1	Vesicle/virulence Net	0	1	NA	NA	NA	Unknown Net	0	1	predicted protein	no GO terms
Bcin05g06280.1	Vesicle/virulence Net	0	1	NA	NA	NA	Polyketide Net	0	3	nadp-dependent leukotriene b4 12-hydroxydehydrogenase	F:zinc ion binding; F:oxidoreductase activity; P:oxidation-reduction process
Bcin05g07040.1	Vesicle/virulence Net	0.00014517	14	NA	NA	NA	NA	NA	NA	glycoside hydrolase family 64 [Botrytis cinerea T4]	F:hydrolase activity
Bcin05g07120.1	Vesicle/virulence Net	0	2	NA	NA	NA	NA	NA	NA	short-chain dehydrogenase reductase SDR [Botrytis cinerea T4]	F:oxidoreductase activity
Bcin05g07680.1	Vesicle/virulence Net	1.82e-06	5	NA	NA	NA	NA	NA	NA	[Botrytis cinerea ]	no GO terms
Bcin06g00610.1	Vesicle/virulence Net	0.00741309	18	Vesicle/virulence and Translate/growth Net	0	3	NA	NA	NA	sphingolipid long chain base-responsive pil1 [Botrytis cinerea 1]	no GO terms
Bcin06g01840.1	Vesicle/virulence Net	0	2	Vesicle/virulence and Translate/growth Net	0	3	NA	NA	NA	Grp1p [Botrytis cinerea T4]	F:nucleotide binding; F:nucleic acid binding
Bcin06g02490.1	Vesicle/virulence Net	0.00428874	23	NA	NA	NA	NA	NA	NA	[Botrytis cinerea ]	C:integral component of membrane
Bcin06g02760.1	Vesicle/virulence Net	0	1	Vesicle/virulence and Translate/growth Net	0	1	NA	NA	NA	nipsnap family [Botrytis cinerea T4]	no GO terms
Bcin06g03900.1	Vesicle/virulence Net	0	1	NA	NA	NA	NA	NA	NA	[Botrytis cinerea ]	no GO terms
Bcin06g04320.1	Vesicle/virulence Net	0.0017319	5	Vesicle/virulence and Translate/growth Net	0	2	Vesicle/virulence Net	0	1	actin cortical patch [Botrytis cinerea 1]	C:integral component of membrane; C:plasma membrane
Bcin06g04320.2	Vesicle/virulence Net	0	2	NA	NA	NA	Vesicle/virulence Net	0	1	hypothetical protein BofuT4_P140360.1	C:integral component of membrane; C:plasma membrane
Bcin06g04320.3	Vesicle/virulence Net	0	2	Vesicle/virulence and Translate/growth Net	0	2	NA	NA	NA	hypothetical protein BofuT4_P140360.1	C:membrane; C:integral component of membrane; C:plasma membrane
Bcin06g04320.4	Vesicle/virulence Net	0.00705463	9	Vesicle/virulence and Translate/growth Net	0	2	Vesicle/virulence Net	1	2	actin cortical patch [Botrytis cinerea 1]	C:integral component of membrane; C:plasma membrane
Bcin06g05230.1	Vesicle/virulence Net	0	1	NA	NA	NA	Polyketide Net	0	1	transcription factor Cys6 [Botrytis cinerea T4]	C:nucleus; F:zinc ion binding; F:RNA polymerase II transcription factor activity, sequence-specific DNA binding; P:regulation of transcription from RNA polymerase II promoter
Bcin06g05410.1	Vesicle/virulence Net	0	1	NA	NA	NA	NA	NA	NA	hypothetical protein BofuT4_P141930.1	C:integral component of membrane
Bcin06g05580.1	Vesicle/virulence Net	0	3	NA	NA	NA	NA	NA	NA	hypothetical protein BofuT4_P142230.1 [Botrytis cinerea T4]	no GO terms
Bcin06g07430.1	Vesicle/virulence Net	0	1	NA	NA	NA	NA	NA	NA	hypothetical protein BC1G_14237	no GO terms
Bcin07g02220.1	Vesicle/virulence Net	0	2	NA	NA	NA	NA	NA	NA	abc multidrug	F:nucleotide binding; F:ATPase activity; F:ATP binding; F:ATPase activity, coupled to transmembrane movement of substances; P:transmembrane transport; C:membrane; C:integral component of membrane; P:transport
Bcin07g02350.1	Vesicle/virulence Net	0.0173814	28	Vesicle/virulence and Translate/growth Net	0	2	NA	NA	NA	mitochondrial phosphate carrier [Botrytis cinerea ]	C:integral component of membrane; P:transport
Bcin07g02550.1	Vesicle/virulence Net	0	1	NA	NA	NA	NA	NA	NA	glycosyl hydrolase	F:catalytic activity; F:hydrolase activity
Bcin07g02610.1	Vesicle/virulence Net	0.00090039	5	Vesicle/virulence and Translate/growth Net	0.0200984	10	Vesicle/virulence Net	0	1	6-phosphogluconate dehydrogenase	P:small molecule metabolic process; F:oxidoreductase activity; P:cofactor metabolic process; P:cellular nitrogen compound metabolic process
Bcin07g03170.1	Vesicle/virulence Net	0.0109273	20	Vesicle/virulence and Translate/growth Net	0.0026574	10	Vesicle/virulence Net	0	2	cell lysis cwl1 [Botrytis cinerea T4]	C:endoplasmic reticulum membrane; C:integral component of membrane
Bcin07g04170.1	Vesicle/virulence Net	0	4	Vesicle/virulence and Translate/growth Net	0	1	NA	NA	NA	long-chain-fatty-acid- ligase [Botrytis cinerea T4]	P:metabolic process; F:ligase activity
Bcin07g04960.1	Vesicle/virulence Net	0	1	NA	NA	NA	NA	NA	NA		no GO terms
Bcin07g07000.1	Vesicle/virulence Net	6.18e-05	12	NA	NA	NA	NA	NA	NA	kelch domain-containing [Botrytis cinerea 1]	F:protein binding
Bcin07g07060.1	Vesicle/virulence Net	0.00993047	21	Vesicle/virulence and Translate/growth Net	7.06e-05	2	NA	NA	NA	hypothetical protein BcDW1_8892	C:integral component of membrane
Bcin08g00270.1	Vesicle/virulence Net	0.00288642	20	Vesicle/virulence and Translate/growth Net	0	1	Vesicle/virulence Net	0	1	sugar transporter [Botrytis cinerea T4]	F:substrate-specific transmembrane transporter activity; P:transmembrane transport; F:transmembrane transporter activity; C:membrane; C:integral component of membrane; F:transporter activity
Bcin08g01030.1	Vesicle/virulence Net	0	6	Vesicle/virulence and Translate/growth Net	0	1	NA	NA	NA	serologically defined colon cancer antigen 1	no GO terms
Bcin08g01350.1	Vesicle/virulence Net	0.00011716	10	Vesicle/virulence and Translate/growth Net	0	3	NA	NA	NA	ph domain-containing	no GO terms
Bcin08g01660.1	Vesicle/virulence Net	0.00211897	5	NA	NA	NA	NA	NA	NA	hypothetical protein BC1G_07889 [Botrytis cinerea B05.10]	F:lipid binding
Bcin08g02850.1	Vesicle/virulence Net	0.00054841	13	NA	NA	NA	NA	NA	NA	hypothetical protein BcDW1_5041	no GO terms
Bcin08g02950.1	Vesicle/virulence Net	0.021518	45	Vesicle/virulence and Translate/growth Net	0	1	Vesicle/virulence Net	0.185185	2	D-arabinitol dehydrogenase [Botrytis cinerea T4]	F:oxidoreductase activity; P:oxidation-reduction process
Bcin08g02990.1	Vesicle/virulence Net	0	1	Peptidase II Net	0.0952381	3	Peptidase II Net	0	2	Bcser2; Peptidase S8/S53 domain superfamily; hypothetical protein BC1G_06836	P:proteolysis; F:serine-type endopeptidase activity
Bcin08g03300.1	Vesicle/virulence Net	0	1	NA	NA	NA	NA	NA	NA	hypothetical protein BofuT4_P132080.1 [Botrytis cinerea T4]	no GO terms
Bcin08g03700.1	Vesicle/virulence Net	0.0594596	17	26S Proteasome regulation Net	1	5	Vesicle/virulence Net	0	1	Bccdc48; cell division control cdc48 [Botrytis cinerea 1]	P:cell division; F:ATP binding; F:hydrolase activity
Bcin08g03910.1	Vesicle/virulence Net	0	1	NA	NA	NA	NA	NA	NA	catalytic subunit of the PKA [Botrytis cinerea]	F:nucleotide binding; F:ATP binding; F:protein kinase activity; P:phosphorylation; F:transferase activity; F:protein serine/threonine kinase activity; P:protein phosphorylation; F:kinase activity
Bcin08g04830.1	Vesicle/virulence Net	0.00036543	9	NA	NA	NA	Vesicle/virulence Net	0	1	glutamic acid rich [Botrytis cinerea 1]	no GO terms
Bcin08g04890.1	Vesicle/virulence Net	1.45e-05	6	NA	NA	NA	NA	NA	NA	arrestin domain-containing [Botrytis cinerea 1]	no GO terms
Bcin08g04890.2	Vesicle/virulence Net	0	1	NA	NA	NA	NA	NA	NA	arrestin domain-containing [Botrytis cinerea 1]	no GO terms
Bcin08g05010.1	Vesicle/virulence Net	0	1	NA	NA	NA	NA	NA	NA	ephrin type-a receptor 8 [Botrytis cinerea 1]
Bcin08g05110.1	Vesicle/virulence Net	0	5	NA	NA	NA	NA	NA	NA	apolipo A-I-binding	C:cytoplasm; F:NADHX epimerase activity
Bcin08g05220.1	Vesicle/virulence Net	0	3	Vesicle/virulence and Translate/growth Net	0.0235252	6	Vesicle/virulence Net	0	2	triosephosphate isomerase [Botrytis cinerea T4]	P:gluconeogenesis; P:pentose-phosphate shunt; P:glycolytic process; F:triose-phosphate isomerase activity
Bcin08g05570.1	Vesicle/virulence Net	0.0139911	37	Vesicle/virulence and Translate/growth Net	0	2	Vesicle/virulence Net	0	1	transcription factor Cys6 [Botrytis cinerea T4]	C:nucleus; F:DNA binding; F:zinc ion binding; P:transcription, DNA-templated; F:RNA polymerase II transcription factor activity, sequence-specific DNA binding; P:regulation of transcription from RNA polymerase II promoter
Bcin08g05780.1	Vesicle/virulence Net	0	1	NA	NA	NA	NA	NA	NA	hypothetical protein BC1G_08963	P:metabolic process; F:hydrolase activity
Bcin08g05800.1	Vesicle/virulence Net	0.00803836	45	Vesicle/virulence and Translate/growth Net	0.00040486	9	Vesicle/virulence Net	0	1	aspartyl-tRNA synthetase [Botrytis cinerea T4]	F:ATP binding; C:cytoplasm; F:aspartate-tRNA ligase activity; P:aspartyl-tRNA aminoacylation
Bcin08g06300.1	Vesicle/virulence Net	0.00012597	11	Vesicle/virulence and Translate/growth Net	0.00503219	2	NA	NA	NA	putative 6-phosphofructokinase protein	P:metabolic process; P:glycolytic process; P:fructose 6-phosphate metabolic process; P:glycolytic process through fructose-6-phosphate; F:6-phosphofructokinase activity; F:nucleotide binding; F:ATP binding; C:cytoplasm; F:catalytic activity; F:metal ion binding; P:phosphorylation; F:transferase activity; F:kinase activity
Bcin08g06690.1	Vesicle/virulence Net	0.00048341	13	Vesicle/virulence and Translate/growth Net	0	1	NA	NA	NA	hypothetical protein BC1G_11457 [Botrytis cinerea B05.10]	C:integral component of membrane
Bcin09g00920.1	Vesicle/virulence Net	0	3	Vesicle/virulence and Translate/growth Net	0	1	NA	NA	NA	bzip transcription factor	F:transcription factor activity, sequence-specific DNA binding; P:regulation of transcription, DNA-templated; F:sequence-specific DNA binding
Bcin09g01290.1	Vesicle/virulence Net	0	5	NA	NA	NA	NA	NA	NA	MFS sugar transporter [Botrytis cinerea T4]	F:substrate-specific transmembrane transporter activity; P:transmembrane transport; F:transmembrane transporter activity; C:membrane; C:integral component of membrane; P:carbohydrate transport; P:transport; F:transporter activity
Bcin09g01310.1	Vesicle/virulence Net	0.00011481	12	Vesicle/virulence and Translate/growth Net	0	1	NA	NA	NA	glycoside hydrolase family 37 [Botrytis cinerea T4]	C:cytoplasm; F:calcium ion binding; P:trehalose catabolic process; F:alpha,alpha-trehalase activity
Bcin09g02130.1	Vesicle/virulence Net	0.00021829	20	Vesicle/virulence and Translate/growth Net	0	2	Vesicle/virulence Net	0	1	cell surface [Botrytis cinerea 1]	no GO terms
Bcin09g02320.1	Vesicle/virulence Net	0	4	NA	NA	NA	NA	NA	NA	kelch domain-containing [Botrytis cinerea 1]	F:protein binding
Bcin09g02420.1	Vesicle/virulence Net	0	2	NA	NA	NA	NA	NA	NA	hypothetical protein BC1G_07142	F:protein binding; F:P-P-bond-hydrolysis-driven protein transmembrane transporter activity; P:intracellular protein transport; C:mitochondrial outer membrane
Bcin09g03810.2	Vesicle/virulence Net	0	1	NA	NA	NA	NA	NA	NA	dienelactone hydrolase family	F:hydrolase activity
Bcin09g04620.1	Vesicle/virulence Net	0.0010621	25	Vesicle/virulence and Translate/growth Net	0.00595238	2	Vesicle/virulence Net	0	2	chaperone heat shock Hsp12 [Botrytis cinerea T4]	P:response to stress
Bcin09g05010.1	Vesicle/virulence Net	0.00345489	8	NA	NA	NA	NA	NA	NA	hypothetical protein BC1G_09860	no GO terms
Bcin09g05020.1	Vesicle/virulence Net	0.0156198	45	Vesicle/virulence and Translate/growth Net	0.0139158	13	Vesicle/virulence Net	1	2	Bcgad1, glutamate decarboxylase [Botrytis cinerea 1]	F:pyridoxal phosphate binding; P:glutamate metabolic process; F:catalytic activity; F:glutamate decarboxylase activity; P:carboxylic acid metabolic process; F:carboxy-lyase activity
Bcin09g05130.1	Vesicle/virulence Net	0.00204754	20	NA	NA	NA	NA	NA	NA	ww rsp5 wwp [Botrytis cinerea 1]	no GO terms
Bcin09g05310.1	Vesicle/virulence Net	0.0165284	2	Peptidase II Net	0	1	Peptidase II Net	0	1	zz type zinc finger domain-containing	F:zinc ion binding
Bcin09g06210.1	Vesicle/virulence Net	0.00520181	16	NA	NA	NA	NA	NA	NA	magnesium ion transporter [Botrytis cinerea 1]	C:integral component of membrane
Bcin09g06230.1	Vesicle/virulence Net	1.59e-05	7	NA	NA	NA	NA	NA	NA	[Botrytis cinerea ]	no GO terms
Bcin09g06900.1	Vesicle/virulence Net	0.0148408	52	Vesicle/virulence and Translate/growth Net	0.00830785	11	Vesicle/virulence Net	0.227273	8	mitogen-activated kinase kinase [Botrytis cinerea T4]	F:ATP binding; F:protein kinase activity; P:protein phosphorylation
Bcin09g06910.1	Vesicle/virulence Net	0	1	Vesicle/virulence and Translate/growth Net	0	1	NA	NA	NA	auxin efflux carrier superfamily [Botrytis cinerea 1]	P:transmembrane transport; C:integral component of membrane
Bcin10g00370.1	Vesicle/virulence Net	0	7	NA	NA	NA	NA	NA	NA	inositol phospholipid synthesis scs3p	C:endoplasmic reticulum membrane; P:lipid storage; C:integral component of membrane
Bcin10g00460.1	Vesicle/virulence Net	0	2	Vesicle/virulence and Translate/growth Net	0	1	NA	NA	NA	AMP binding domain [Botrytis cinerea T4]	F:catalytic activity; P:metabolic process
Bcin10g02060.1	Vesicle/virulence Net	0	2	NA	NA	NA	NA	NA	NA	oxidoreductase [Botrytis cinerea T4]	F:oxidoreductase activity; P:oxidation-reduction process
Bcin10g02960.1	Vesicle/virulence Net	2.9e-05	8	Vesicle/virulence and Translate/growth Net	0	2	NA	NA	NA	duf1295 domain	C:cellular_component
Bcin10g03500.1	Vesicle/virulence Net	0	4	NA	NA	NA	NA	NA	NA	phosphatidylserine decarboxylase proenzyme [Botrytis cinerea T4]	C:integral component of membrane; F:phosphatidylserine decarboxylase activity; P:phospholipid biosynthetic process
Bcin10g03890.1	Vesicle/virulence Net	0	7	NA	NA	NA	NA	NA	NA	hypothetical protein BC1G_15407 [Botrytis cinerea B05.10]	F:catalytic activity; P:metabolic process
Bcin10g03910.1	Vesicle/virulence Net	0.00012968	15	NA	NA	NA	NA	NA	NA	heat shock [Botrytis cinerea ]	F:ATP binding; P:protein metabolic process
Bcin10g04120.1	Vesicle/virulence Net	0	2	NA	NA	NA	NA	NA	NA	hypothetical protein BofuT4_P063250.1	no GO terms
Bcin10g04320.1	Vesicle/virulence Net	0.00829876	2	Peptidase II Net	0.380952	4	Peptidase II Net	0.5	3	heavy metal detoxification; CBPYA_BOTFB ame: Full=Carboxypeptidase Y homolog A Flags: Precursor	P:phytochelatin biosynthetic process; P:proteolysis; F:serine-type carboxypeptidase activity; C:fungal-type vacuole
Bcin11g01310.1	Vesicle/virulence Net	0	2	NA	NA	NA	NA	NA	NA	hypothetical protein BC1G_03976	no GO terms
Bcin11g01560.1	Vesicle/virulence Net	1.51e-05	5	Vesicle/virulence and Translate/growth Net	0	2	Vesicle/virulence Net	0	1	Auxin Efflux Carrier superfamily	P:transmembrane transport; C:integral component of membrane
Bcin11g01690.1	Vesicle/virulence Net	1.73e-05	3	Vesicle/virulence and Translate/growth Net	0	1	Vesicle/virulence Net	0	1	acetate kinase	F:magnesium ion binding; P:organic acid metabolic process; F:ATP binding; P:acetyl-CoA biosynthetic process; P:phosphorylation; C:intracellular; F:acetate kinase activity
Bcin11g01700.1	Vesicle/virulence Net	0.0250544	9	Vesicle/virulence and Translate/growth Net	0	1	Vesicle/virulence Net	0	1	similar to phosphoketolase	F:aldehyde-lyase activity; P:carbohydrate metabolic process
Bcin11g02030.1	Vesicle/virulence Net	0.00040253	6	NA	NA	NA	NA	NA	NA	hypothetical protein BC1G_04075 [Botrytis cinerea B05.10]	C:cellular_component
Bcin11g02070.1	Vesicle/virulence Net	0	7	NA	NA	NA	NA	NA	NA	hypothetical protein BofuT4P29000015001	no GO terms
Bcin11g02280.1	Vesicle/virulence Net	0	2	NA	NA	NA	NA	NA	NA	glycoside hydrolase family 5 [Botrytis cinerea T4]	P:carbohydrate metabolic process; F:hydrolase activity, hydrolyzing O-glycosyl compounds
Bcin11g02440.1	Vesicle/virulence Net	0	1	NA	NA	NA	NA	NA	NA	rnapii degradation factor def1 [Botrytis cinerea 1]	F:protein binding
Bcin11g02720.1	Vesicle/virulence Net	0.0292553	45	Vesicle/virulence and Translate/growth Net	0.416698	6	Vesicle/virulence Net	0.1633	4	alcohol dehydrogenase [Botrytis cinerea ]	F:oxidoreductase activity; P:oxidation-reduction process
Bcin11g02730.1	Vesicle/virulence Net	0.252564	117	Vesicle/virulence and Translate/growth Net	0.433113	19	Vesicle/virulence Net	0	1	BcPIO5, CDP-alcohol phosphatidyltransferase [Botrytis cinerea ]	HAD-superfamily hydrolase, subfamily IIA, CECR5
Bcin11g03080.1	Vesicle/virulence Net	0	3	NA	NA	NA	Vesicle/virulence Net	0	4	oxysterol binding (Osh5) [Botrytis cinerea T4]	no GO terms
Bcin11g03090.1	Vesicle/virulence Net	0.00549545	9	Vesicle/virulence and Translate/growth Net	0.306914	13	Vesicle/virulence Net	0.106734	4	fructose-bisphosphate aldolase [Botrytis cinerea ]	F:zinc ion binding; P:glycolytic process; F:fructose-bisphosphate aldolase activity
Bcin11g03260.1	Vesicle/virulence Net	0	1	NA	NA	NA	NA	NA	NA	9 [Botrytis cinerea T4]	no GO terms
Bcin11g03860.1	Vesicle/virulence Net	0.00020536	15	NA	NA	NA	NA	NA	NA	hypothetical protein BofuT4_P080480.1	no GO terms
Bcin11g04710.1	Vesicle/virulence Net	3.23e-05	5	Vesicle/virulence and Translate/growth Net	0	1	NA	NA	NA	glycerol dehydrogenase [Botrytis cinerea T4]	F:oxidoreductase activity; P:oxidation-reduction process
Bcin11g04790.1	Vesicle/virulence Net	0.0124923	33	Vesicle/virulence and Translate/growth Net	0	2	Vesicle/virulence Net	0.0363636	2	aldehyde reductase	F:oxidoreductase activity; P:oxidation-reduction process
Bcin11g04930.1	Vesicle/virulence Net	0.0296756	69	Vesicle/virulence and Translate/growth Net	0	1	Vesicle/virulence Net	0.50101	2	msc1 [Botrytis cinerea 1]	Putative stress-responsive protein
Bcin11g05070.1	Vesicle/virulence Net	0	1	NA	NA	NA	NA	NA	NA	hypothetical protein BC1G_03255 [Botrytis cinerea B05.10]	C:integral component of membrane
Bcin11g05390.1	Vesicle/virulence Net	0.00966224	20	Vesicle/virulence and Translate/growth Net	0	1	Vesicle/virulence Net	0	1	hypothetical protein BC1G_15020 [Botrytis cinerea B05.10]	no GO terms
Bcin11g05390.2	Vesicle/virulence Net	0.0132269	38	Vesicle/virulence and Translate/growth Net	0	1	Vesicle/virulence Net	0	1	hypothetical protein BC1G_15020 [Botrytis cinerea B05.10]	no GO terms
Bcin11g05700.1	Vesicle/virulence Net	0.00021891	4	Vesicle/virulence and Translate/growth Net	0	2	NA	NA	NA	hexokinase [Botrytis cinerea ]	F:glucose binding; C:cell; F:ATP binding; P:cellular glucose homeostasis; P:glycolytic process; F:hexokinase activity; P:carbohydrate phosphorylation
Bcin11g06230.1	Vesicle/virulence Net	2.42e-05	6	NA	NA	NA	NA	NA	NA	integral membrane	C:integral component of membrane
Bcin12g00220.1	Vesicle/virulence Net	0	4	NA	NA	NA	NA	NA	NA	pyruvate dehydrogenase dihydrolipoamide acetyltransferase component [Botrytis cinerea 1]	C:integral component of membrane; F:transferase activity
Bcin12g00390.1	Vesicle/virulence Net	0.0063474	17	NA	NA	NA	NA	NA	NA	alcohol dehydrogenase [Botrytis cinerea T4]	F:zinc ion binding; F:oxidoreductase activity; P:oxidation-reduction process
Bcin12g00770.1	Vesicle/virulence Net	4.43e-05	11	Vesicle/virulence and Translate/growth Net	0	3	NA	NA	NA	phospholipase d p1	F:catalytic activity
Bcin12g00900.1	Vesicle/virulence Net	0.00027635	17	NA	NA	NA	NA	NA	NA	NAD-dependent epimerase dehydratase	F:coenzyme binding; F:catalytic activity
Bcin12g01220.1	Vesicle/virulence Net	0.00018562	8	NA	NA	NA	NA	NA	NA	hypothetical protein BC1G_03447	no GO terms
Bcin12g01440.1	Vesicle/virulence Net	0.00027163	14	Vesicle/virulence and Translate/growth Net	7.44e-05	3	NA	NA	NA	MFS sugar transporter	F:substrate-specific transmembrane transporter activity; P:transmembrane transport; C:integral component of membrane; P:carbohydrate transport
Bcin12g03000.1	Vesicle/virulence Net	5.66e-05	10	Vesicle/virulence and Translate/growth Net	0.0160435	11	Vesicle/virulence Net	0.226936	6	iq calmodulin-binding motif	F:catalytic activity
Bcin12g03150.1	Vesicle/virulence Net	0	1	NA	NA	NA	NA	NA	NA	26S proteasome non-ATPase regulatory subunit 2 [Botrytis cinerea T4]	P:regulation of catalytic activity; P:regulation of protein catabolic process; C:proteasome complex; F:enzyme regulator activity
Bcin12g03650.1	Vesicle/virulence Net	0	1	NA	NA	NA	Polyketide Net	0	1	aryl-alcohol dehydrogenase [Botrytis cinerea T4]	no GO terms
Bcin12g03680.1	Vesicle/virulence Net	0	4	NA	NA	NA	NA	NA	NA	NAD dependent epimerase dehydratase family [Botrytis cinerea T4]	F:NAD binding; P:oxidation-reduction process; F:oxidoreductase activity, acting on the aldehyde or oxo group of donors, NAD or NADP as acceptor
Bcin12g03700.1	Vesicle/virulence Net	0.0009773	11	Vesicle/virulence and Translate/growth Net	0	1	NA	NA	NA	NADH-ubiquinone oxidoreductase [Botrytis cinerea T4]	F:oxidoreductase activity; F:calcium ion binding; C:integral component of membrane; P:oxidation-reduction process
Bcin12g05030.1	Vesicle/virulence Net	0.00273145	18	Vesicle/virulence and Translate/growth Net	0	1	Vesicle/virulence Net	0.0885522	5	7 [Botrytis cinerea T4]	no GO terms
Bcin12g05690.1	Vesicle/virulence Net	0.0570367	6	Vesicle/virulence and Translate/growth Net	0	1	Polyketide Net	0.637018	15	Bcgst20; glutathione s-transferase	F:transferase activity
Bcin12g06140.1	Vesicle/virulence Net	0	3	NA	NA	NA	NA	NA	NA	ZIP Zinc transporter [Botrytis cinerea T4]	P:transmembrane transport; C:integral component of membrane; F:metal ion transmembrane transporter activity; P:metal ion transport
Bcin12g06460.1	Vesicle/virulence Net	0.0659354	3	Vesicle/virulence and Translate/growth Net	0	1	NA	NA	NA	dienelactone hydrolase family [Botrytis cinerea T4]	F:hydrolase activity
Bcin13g00710.1	Vesicle/virulence Net	0.0124481	5	Vesicle/virulence and Translate/growth Net	0	1	Polyketide Net	0.1	2	abc transporter	F:ATPase activity; F:ATP binding; F:ATPase activity, coupled to transmembrane movement of substances; C:membrane; C:integral component of membrane; P:transport
Bcin13g01020.1	Vesicle/virulence Net	0.00308546	36	Vesicle/virulence and Translate/growth Net	0	2	Vesicle/virulence Net	0.352862	5	predicted protein	no GO terms
Bcin13g01450.1	Vesicle/virulence Net	0	1	NA	NA	NA	NA	NA	NA	hypothetical protein BC1G_04317	no GO terms
Bcin13g01790.1	Vesicle/virulence Net	0.00829876	2	Vesicle/virulence and Translate/growth Net	0.00595238	2	Vesicle/virulence Net	0	1	[Botrytis cinerea ]	no GO terms
Bcin13g03330.1	Vesicle/virulence Net	0	3	Vesicle/virulence and Translate/growth Net	0	2	NA	NA	NA	hypothetical protein BcDW1_7517
Bcin13g03470.1	Vesicle/virulence Net	0.00013271	15	NA	NA	NA	NA	NA	NA	predicted protein	no GO terms
Bcin13g04000.1	Vesicle/virulence Net	2.68e-05	9	Vesicle/virulence and Translate/growth Net	0	1	NA	NA	NA	d-arabinitol 2-dehydrogenase	F:oxidoreductase activity; P:oxidation-reduction process
Bcin13g04470.1	Vesicle/virulence Net	0.00048064	18	Vesicle/virulence and Translate/growth Net	0	1	NA	NA	NA		F:nucleic acid binding
Bcin13g04640.1	Vesicle/virulence Net	0	4	NA	NA	NA	NA	NA	NA	hypothetical protein BC1G_13374	F:oxidoreductase activity
Bcin13g04830.1	Vesicle/virulence Net	0	2	NA	NA	NA	NA	NA	NA	hypothetical protein BofuT4_P078570.1	P:intracellular protein transport; C:intracellular
Bcin13g04860.1	Vesicle/virulence Net	0.00018159	12	Vesicle/virulence and Translate/growth Net	0.0133019	15	Vesicle/virulence Net	0.232997	4	PH domain-containing [Botrytis cinerea T4]	no GO terms
Bcin13g05780.1	Vesicle/virulence Net	7.76e-05	9	Vesicle/virulence and Translate/growth Net	0.00324753	8	Vesicle/virulence Net	0.0363636	3	hypothetical protein BofuT4P59000002001 [Botrytis cinerea T4]	no GO terms
Bcin14g01200.1	Vesicle/virulence Net	0	1	NA	NA	NA	NA	NA	NA	22kda glyco [Botrytis cinerea 1]	no GO terms
Bcin14g01980.1	Vesicle/virulence Net	0.0207838	23	Vesicle/virulence and Translate/growth Net	0.0158942	9	Vesicle/virulence Net	0.0713805	3	transketolase [Botrytis cinerea T4]	F:transketolase activity; F:metal ion binding; P:metabolic process
Bcin14g02440.1	Vesicle/virulence Net	0.0166488	10	Vesicle/virulence and Translate/growth Net	0.00595238	3	Vesicle/virulence Net	1	2	phosphatidyl synthase [Botrytis cinerea T4]	no GO terms
Bcin14g03020.1	Vesicle/virulence Net	0	1	NA	NA	NA	NA	NA	NA	hypothetical protein BC1G_10055 [Botrytis cinerea B05.10]	no GO terms
Bcin14g03030.1	Vesicle/virulence Net	0.00907641	48	Vesicle/virulence and Translate/growth Net	0.0177861	3	Vesicle/virulence Net	0.0313131	4	hypothetical protein BC1G_10056	no GO terms
Bcin14g03610.1	Vesicle/virulence Net	0.0459996	79	Vesicle/virulence and Translate/growth Net	0.0415022	17	Vesicle/virulence Net	0.510887	6	mismatched base pair and cruciform dna recognition [Botrytis cinerea 1]	Stress response protein YjbJ
Bcin14g04110.1	Vesicle/virulence Net	0.00872792	38	Vesicle/virulence and Translate/growth Net	0.0149398	9	Vesicle/virulence Net	0	1	stress response RCI peptide [Botrytis cinerea T4]	C:integral component of membrane
Bcin14g04530.1	Vesicle/virulence Net	0	1	Vesicle/virulence and Translate/growth Net	0	1	Vesicle/virulence Net	0	1	2,3-diketo-5-methylthio-1-phosphopentane phosphatase	F:phosphatase activity; P:dephosphorylation
Bcin14g05350.1	Vesicle/virulence Net	0.0400011	64	Vesicle/virulence and Translate/growth Net	0.067638	23	Vesicle/virulence Net	0	1	meiotically up-regulated	C:integral component of membrane
Bcin15g00430.1	Vesicle/virulence Net	0.00716058	18	Vesicle/virulence and Translate/growth Net	0	1	NA	NA	NA	NACHT and Ankyrin domain [Botrytis cinerea T4]	F:protein binding
Bcin15g01330.1	Vesicle/virulence Net	0.044123	57	Vesicle/virulence and Translate/growth Net	0.00416106	7	Vesicle/virulence Net	0	1	BcPtpA, similar to protein phosphatase	F:protein tyrosine phosphatase activity; P:peptidyl-tyrosine dephosphorylation
Bcin15g02260.1	Vesicle/virulence Net	0	1	Vesicle/virulence and Translate/growth Net	0	4	Vesicle/virulence Net	0	1	[Botrytis cinerea ]	no GO terms
Bcin15g02270.1	Vesicle/virulence Net	0.00010568	12	Vesicle/virulence and Translate/growth Net	0.00738547	8	Vesicle/virulence Net	1	2	glycogen synthase [Botrytis cinerea ]	P:glycogen biosynthetic process; F:glycogen (starch) synthase activity
Bcin15g03290.1	Vesicle/virulence Net	0.0158905	4	26S Proteasome regulation Net	0	1	NA	NA	NA	actin binding [Botrytis cinerea T4]	F:protein binding; F:actin binding; C:intracellular
Bcin15g03340.1	Vesicle/virulence Net	0	1	NA	NA	NA	NA	NA	NA		F:ATP binding; F:catalytic activity; P:fructose 2,6-bisphosphate metabolic process; P:fructose metabolic process; F:6-phosphofructo-2-kinase activity
Bcin15g03430.1	Vesicle/virulence Net	0.00012653	9	Vesicle/virulence and Translate/growth Net	0	1	NA	NA	NA	MFS sugar transporter	F:substrate-specific transmembrane transporter activity; P:transmembrane transport; C:integral component of membrane; P:carbohydrate transport
Bcin15g03460.1	Vesicle/virulence Net	0	1	NA	NA	NA	NA	NA	NA	hypothetical protein BC1G_02985	F:protein binding
Bcin15g03580.1	Vesicle/virulence Net	0.00062749	19	Vesicle/virulence and Translate/growth Net	0.00384029	14	Vesicle/virulence Net	0	3	stress-activated mitogen-activated kinase [Botrytis cinerea]	C:nucleus; C:cytoplasm; F:ion binding; P:cellular protein modification process; P:cellular nitrogen compound metabolic process; P:biosynthetic process; F:signal transducer activity; F:kinase activity
Bcin15g03580.2	Vesicle/virulence Net	0.0281252	61	Vesicle/virulence and Translate/growth Net	0.0116011	10	Vesicle/virulence Net	0.421998	6	stress-activated mitogen-activated kinase [Botrytis cinerea]	C:nucleus; C:cytoplasm; F:ion binding; P:cellular protein modification process; P:cellular nitrogen compound metabolic process; P:biosynthetic process; F:signal transducer activity; F:kinase activity
Bcin15g03580.3	Vesicle/virulence Net	0.010262	39	Vesicle/virulence and Translate/growth Net	0.0280342	15	Vesicle/virulence Net	0.00179574	4	stress-activated mitogen-activated kinase [Botrytis cinerea]	F:ATP binding; F:MAP kinase activity; F:protein kinase activity; P:protein phosphorylation
Bcin15g03860.1	Vesicle/virulence Net	0.00224619	11	Vesicle/virulence and Translate/growth Net	0	1	NA	NA	NA	flavin-binding monooxygenase [Botrytis cinerea T4]	F:NADP binding; F:flavin adenine dinucleotide binding; P:oxidation-reduction process; F:N,N-dimethylaniline monooxygenase activity
Bcin15g03930.1	Vesicle/virulence Net	0.0338228	55	Vesicle/virulence and Translate/growth Net	0	1	Vesicle/virulence Net	0	1	Bcpom33, TMEM33/Pom33 family, hypothetical protein BofuT4_P002700.1	structural constituent of nuclear pore; C:integral component of membrane
Bcin15g04030.1	Vesicle/virulence Net	0.00092491	21	Vesicle/virulence and Translate/growth Net	0	1	NA	NA	NA	putative protein bli-3 protein	F:FMN binding; F:oxidoreductase activity; P:oxidation-reduction process
Bcin15g04060.1	Vesicle/virulence Net	0	1	NA	NA	NA	NA	NA	NA	c3hc4 type (ring finger) zinc finger containing	F:zinc ion binding
Bcin15g04580.1	Vesicle/virulence Net	2.65e-05	13	NA	NA	NA	NA	NA	NA	[Botrytis cinerea ]	no GO terms
Bcin15g04680.1	Vesicle/virulence Net	0	4	NA	NA	NA	NA	NA	NA	hypothetical protein BcDW1_147	no GO terms
Bcin15g04970.1	Vesicle/virulence Net	0.00609552	13	Vesicle/virulence and Translate/growth Net	0.0150133	7	Vesicle/virulence Net	0	2	glucose-6-phosphate isomerase	F:glucose-6-phosphate isomerase activity; P:gluconeogenesis; P:glycolytic process
Bcin15g05120.1	Vesicle/virulence Net	0.00056095	15	Vesicle/virulence and Translate/growth Net	0.00203134	6	NA	NA	NA	hypothetical protein BC1G_15129	no GO terms
Bcin15g05180.1	Vesicle/virulence Net	0.00376347	26	Vesicle/virulence and Translate/growth Net	0	1	NA	NA	NA	hypothetical protein BcDW1_8296	no GO terms
Bcin16g00050.1	Vesicle/virulence Net	0	2	Vesicle/virulence and Translate/growth Net	0	1	NA	NA	NA	l-asparaginase precursor [Botrytis cinerea 1]	F:hydrolase activity
Bcin16g01090.1	Vesicle/virulence Net	0.00835937	12	Vesicle/virulence and Translate/growth Net	0.00595238	3	Vesicle/virulence Net	0	1	---NA---	no GO terms
Bcin16g01270.1	Vesicle/virulence Net	0.023404	38	Vesicle/virulence and Translate/growth Net	0.0140652	7	Vesicle/virulence Net	0.0363636	3	hypothetical protein BC1G_10423 [Botrytis cinerea B05.10]	no GO terms
Bcin16g03080.1	Vesicle/virulence Net	0.00027009	14	NA	NA	NA	NA	NA	NA	transcription factor	no GO terms
Bcin16g03360.1	Vesicle/virulence Net	0.00040647	16	NA	NA	NA	NA	NA	NA	hypothetical protein BC1G_09255	no GO terms
Bcin16g03380.1	Vesicle/virulence Net	0.0406138	77	Vesicle/virulence and Translate/growth Net	0.0294065	2	Vesicle/virulence Net	0.0343434	4	mannitol dehydrogenase [Botrytis cinerea]	no GO terms
Bcin16g04690.1	Vesicle/virulence Net	0	1	NA	NA	NA	NA	NA	NA	signal sequence receptor alpha chain [Botrytis cinerea ]	C:endoplasmic reticulum membrane; C:integral component of membrane
Bcin16g05140.1	Vesicle/virulence Net	0	1	NA	NA	NA	NA	NA	NA	gtpase-activating gyp7	no GO terms
Bcin01g00770.1	Translation/growth Net	0.00300208	72	Vesicle/virulence and Translate/growth Net	0.0025983	98	Translation/growth Net	0.00110188	77	60S ribosomal L37 [Botrytis cinerea ]	F:RNA binding; F:structural constituent of ribosome; C:intracellular ribonucleoprotein complex; F:metal ion binding; F:rRNA binding; C:ribosome; C:intracellular; P:translation
Bcin01g00770.2	Translation/growth Net	0.00219568	58	Vesicle/virulence and Translate/growth Net	8.61e-05	88	Translation/growth Net	0.00075191	74	60S ribosomal L37 [Botrytis cinerea ]	F:RNA binding; F:structural constituent of ribosome; C:intracellular ribonucleoprotein complex; F:metal ion binding; F:rRNA binding; C:ribosome; C:intracellular; P:translation
Bcin01g00980.1	Translation/growth Net	0.0066575	89	Vesicle/virulence and Translate/growth Net	0.00334841	112	Translation/growth Net	0.00212151	83	40S ribosomal S2 [Botrytis cinerea ]	F:RNA binding; F:structural constituent of ribosome; C:intracellular ribonucleoprotein complex; C:cytosolic small ribosomal subunit; C:small ribosomal subunit; C:ribosome; P:translation
Bcin01g01800.1	Translation/growth Net	0.00270807	85	Vesicle/virulence and Translate/growth Net	0.00293464	111	Translation/growth Net	0.0031218	84	40S ribosomal S4 [Botrytis cinerea ]	F:RNA binding; F:structural constituent of ribosome; C:intracellular ribonucleoprotein complex; C:ribosome; F:rRNA binding; C:intracellular; P:translation
Bcin01g02200.1	Translation/growth Net	0.00189068	72	Vesicle/virulence and Translate/growth Net	0.00028965	95	Translation/growth Net	0.00121262	80	40S ribosomal S9 [Botrytis cinerea ]	F:RNA binding; F:structural constituent of ribosome; C:intracellular ribonucleoprotein complex; C:small ribosomal subunit; C:ribosome; F:rRNA binding; C:intracellular; P:translation
Bcin01g02210.1	Translation/growth Net	0.0102218	86	Vesicle/virulence and Translate/growth Net	0.00016642	92	Translation/growth Net	0.00065416	71	60S ribosomal L21 [Botrytis cinerea ]	F:structural constituent of ribosome; C:ribosome; C:intracellular; P:translation
Bcin01g02680.1	Translation/growth Net	0.0150762	32	Vesicle/virulence and Translate/growth Net	0.0245377	121	Translation/growth Net	0.00068074	2	EIF3B_BOTFB, Eukaryotic translation initiation factor 3 subunit B	C:eukaryotic 48S preinitiation complex; P:translational initiation; P:regulation of translational initiation; C:eukaryotic translation initiation factor 3 complex; P:translation; F:nucleotide binding; F:nucleic acid binding; F:translation initiation factor activity; P:formation of translation preinitiation complex; F:RNA binding; C:cytoplasm; C:eukaryotic 43S preinitiation complex; F:translation …
Bcin01g03000.1	Translation/growth Net	0.0313711	4	Vesicle/virulence and Translate/growth Net	0.0237551	7	Translation/growth Net	0	1	inorganic pyrophosphatase	F:magnesium ion binding; F:inorganic diphosphatase activity; C:cytoplasm; P:phosphate-containing compound metabolic process
Bcin01g05590.1	Translation/growth Net	0.00016165	53	Vesicle/virulence and Translate/growth Net	0.014564	118	Translation/growth Net	1.57e-05	10	eukaryotic initiation factor 4A [Botrytis cinerea ]	F:nucleic acid binding; F:ATP binding
Bcin01g06650.1	Translation/growth Net	1.42e-05	16	Vesicle/virulence and Translate/growth Net	0.00129174	68	Translation/growth Net	0.00021005	54	40s ribosomal s28	F:structural constituent of ribosome; C:ribosome; C:intracellular; P:translation
Bcin01g09350.1	Translation/growth Net	0.00167679	66	Vesicle/virulence and Translate/growth Net	0.00226722	89	Translation/growth Net	0.00044677	71	60S ribosomal L36 [Botrytis cinerea ]	F:structural constituent of ribosome; C:intracellular ribonucleoprotein complex; C:ribosome; C:intracellular; P:translation
Bcin01g09620.1	Translation/growth Net	0.00629781	87	Vesicle/virulence and Translate/growth Net	0.0032503	96	Translation/growth Net	0.00118717	82	60S ribosomal L11 [Botrytis cinerea ]	F:structural constituent of ribosome; C:intracellular ribonucleoprotein complex; C:ribosome; C:intracellular; P:translation
Bcin01g09660.1	Translation/growth Net	0.00297378	80	Vesicle/virulence and Translate/growth Net	0.00013368	86	Translation/growth Net	0.00075996	71	60S ribosomal L33 [Botrytis cinerea ]	F:structural constituent of ribosome; C:ribosome; C:intracellular; P:translation
Bcin01g09900.1	Translation/growth Net	0	1	Vesicle/virulence and Translate/growth Net	9.81e-05	32	NA	NA	NA	eukaryotic translation initiation factor 2 subunit gamma [Botrytis cinerea T4]	F:nucleotide binding; F:GTP binding; F:translation initiation factor activity; F:GTPase activity; P:translational initiation
Bcin02g01060.1	Translation/growth Net	0	2	Vesicle/virulence and Translate/growth Net	0	1	NA	NA	NA	nucleoside diphosphate kinase [Botrytis cinerea 1]	F:nucleotide binding; F:ATP binding; P:UTP biosynthetic process; P:CTP biosynthetic process; P:GTP biosynthetic process; P:nucleoside diphosphate phosphorylation; F:nucleoside diphosphate kinase activity; P:phosphorylation; F:transferase activity; F:kinase activity
Bcin02g02750.1	Translation/growth Net	0.0138461	4	Vesicle/virulence and Translate/growth Net	0.00149193	24	Translation/growth Net	0.00089532	2	mitochondrial citrate synthase precursor [Botrytis cinerea T4]	F:citrate (Si)-synthase activity; P:citrate metabolic process; P:tricarboxylic acid cycle; F:transferase activity; F:transferase activity, transferring acyl groups, acyl groups converted into alkyl on transfer
Bcin02g03530.1	Translation/growth Net	0.0014032	80	Vesicle/virulence and Translate/growth Net	0.00043288	98	Translation/growth Net	0.00039389	77	60s acidic ribosomal p2	F:structural constituent of ribosome; C:intracellular ribonucleoprotein complex; C:ribosome; P:translational elongation; C:intracellular
Bcin02g03540.1	Translation/growth Net	0.0015758	81	Vesicle/virulence and Translate/growth Net	0.003604	115	Translation/growth Net	0.0035947	84	40S ribosomal S15 [Botrytis cinerea ]	F:RNA binding; F:structural constituent of ribosome; C:intracellular ribonucleoprotein complex; C:small ribosomal subunit; C:ribosome; P:translation
Bcin02g04220.1	Translation/growth Net	0.106754	74	Vesicle/virulence and Translate/growth Net	0.00446336	103	Translation/growth Net	0.00404303	68	60S ribosomal L4 [Botrytis cinerea T4]	F:structural constituent of ribosome; C:ribosome; P:translation
Bcin02g05140.1	Translation/growth Net	0.0031932	80	Vesicle/virulence and Translate/growth Net	0.00925503	98	Translation/growth Net	0.00064382	76	60S ribosomal L28 [Botrytis cinerea ]	F:structural constituent of ribosome; C:intracellular ribonucleoprotein complex; C:large ribosomal subunit; C:ribosome; C:intracellular; P:translation
Bcin02g06060.1	Translation/growth Net	0.00203845	79	Vesicle/virulence and Translate/growth Net	0.00111854	94	Translation/growth Net	0.00146276	82	40S ribosomal S26	F:structural constituent of ribosome; C:ribosome; C:intracellular; P:translation
Bcin02g06070.1	Translation/growth Net	1.88e-05	4	Vesicle/virulence and Translate/growth Net	4.14e-06	69	Translation/growth Net	4.27e-06	27	ubiquitin-40S ribosomal S31 fusion [Botrytis cinerea ]	F:structural constituent of ribosome; C:ribosome; P:translation
Bcin02g06900.1	Translation/growth Net	0.00177718	80	Vesicle/virulence and Translate/growth Net	0.00103964	92	Translation/growth Net	0.00152489	82	40S ribosomal S20 [Botrytis cinerea ]	F:RNA binding; F:structural constituent of ribosome; C:small ribosomal subunit; C:ribosome; C:intracellular; P:translation
Bcin02g08260.1	Translation/growth Net	0.00211633	19	Vesicle/virulence and Translate/growth Net	0.0147652	95	Translation/growth Net	0.00312968	6	EIF3E_BOTFB, Eukaryotic translation initiation factor 3 subunit E	F:translation initiation factor activity; P:formation of translation preinitiation complex; C:cytoplasm; C:eukaryotic 43S preinitiation complex; C:eukaryotic 48S preinitiation complex; P:regulation of translational initiation; P:translational initiation; C:eukaryotic translation initiation factor 3 complex; P:translation
Bcin03g00590.1	Translation/growth Net	0.00511295	83	Vesicle/virulence and Translate/growth Net	0.01062	119	Translation/growth Net	0.00696121	88	40S ribosomal S5	F:RNA binding; F:structural constituent of ribosome; C:intracellular ribonucleoprotein complex; C:cytosolic small ribosomal subunit; F:mRNA binding; C:small ribosomal subunit; P:ribosomal small subunit assembly; C:ribosome; F:rRNA binding; P:translation
Bcin03g00790.1	Translation/growth Net	0.0128185	93	Vesicle/virulence and Translate/growth Net	0.00041903	98	Translation/growth Net	0.00076505	81	40S ribosomal S25 [Botrytis cinerea ]	C:ribosome
Bcin03g01010.1	Translation/growth Net	0.0490781	6	Vesicle/virulence and Translate/growth Net	0.00266986	33	Translation/growth Net	0.017562	3	ADP ATP carrier [Botrytis cinerea ]	P:transmembrane transport; C:membrane; C:integral component of membrane; P:transport; F:transporter activity; C:mitochondrial inner membrane
Bcin03g01030.1	Translation/growth Net	0	3	Vesicle/virulence and Translate/growth Net	0.00023045	8	Translation/growth Net	0	1	mitochondrial phosphate carrier [Botrytis cinerea ]	P:transmembrane transport; C:membrane; C:integral component of membrane; P:transport
Bcin03g01820.1	Translation/growth Net	0.00317724	85	Vesicle/virulence and Translate/growth Net	0.0245612	109	Translation/growth Net	0.00236162	84	60S ribosomal L1 [Botrytis cinerea ]	F:RNA binding; F:structural constituent of ribosome; C:large ribosomal subunit; P:translation
Bcin03g01900.1	Translation/growth Net	0.00026331	42	Vesicle/virulence and Translate/growth Net	0.00690032	92	Translation/growth Net	0.00018285	43	ribosomal protein L39e, putative	F:structural constituent of ribosome; C:ribosome; C:intracellular; P:translation
Bcin03g02320.1	Translation/growth Net	0	1	Vesicle/virulence and Translate/growth Net	0.0059217	82	Translation/growth Net	0	1	EIF3L_BOTFB ame: Full=Eukaryotic translation initiation factor 3 subunit L Short=eIF3l	F:translation initiation factor activity; P:formation of translation preinitiation complex; C:eukaryotic 43S preinitiation complex; C:integral component of membrane; C:eukaryotic 48S preinitiation complex; P:regulation of translational initiation; C:eukaryotic translation initiation factor 3 complex
Bcin03g02530.1	Translation/growth Net	0.00370183	86	Vesicle/virulence and Translate/growth Net	0.00690239	121	Translation/growth Net	0.0104255	85	60S ribosomal L2	F:structural constituent of ribosome; P:cytoplasmic translation; C:cytosolic large ribosomal subunit
Bcin03g02940.1	Translation/growth Net	0	1	Vesicle/virulence and Translate/growth Net	0	4	NA	NA	NA	glycyl-tRNA synthetase [Botrytis cinerea T4]	F:glycine-tRNA ligase activity; F:ATP binding; P:glycyl-tRNA aminoacylation; C:cytoplasm
Bcin03g03620.1	Translation/growth Net	0.0020864	82	Vesicle/virulence and Translate/growth Net	0.00026902	95	Translation/growth Net	0.00324354	87	40S ribosomal S19 [Botrytis cinerea ]	F:structural constituent of ribosome; C:ribosome; P:translation
Bcin03g05780.1	Translation/growth Net	0.00061977	75	Vesicle/virulence and Translate/growth Net	0.00048969	97	Translation/growth Net	0.00138399	81	predicted protein
Bcin03g05960.1	Translation/growth Net	0.0425305	61	Vesicle/virulence and Translate/growth Net	0.0133252	90	Translation/growth Net	0.00016647	11	elongation factor 1 gamma domain-containing [Botrytis cinerea ]	F:translation elongation factor activity; P:translational elongation
Bcin03g06170.1	Translation/growth Net	0.00409644	87	Vesicle/virulence and Translate/growth Net	0.00189762	105	Translation/growth Net	0.00155122	82	40S ribosomal S1 [Botrytis cinerea ]	F:structural constituent of ribosome; C:intracellular ribonucleoprotein complex; C:cytoplasm; C:cytosolic small ribosomal subunit; C:ribosome; C:intracellular; P:translation
Bcin03g06530.1	Translation/growth Net	0.0039469	85	Vesicle/virulence and Translate/growth Net	0.00628487	117	Translation/growth Net	0.00365133	85	60s ribosomal l8	C:intracellular ribonucleoprotein complex; P:ribosome biogenesis; C:ribosome
Bcin03g06530.2	Translation/growth Net	0.00487161	88	Vesicle/virulence and Translate/growth Net	0.00200362	113	Translation/growth Net	0.00449849	86	60s ribosomal l8	C:intracellular ribonucleoprotein complex; P:ribosome biogenesis; C:ribosome
Bcin03g06940.1	Translation/growth Net	0.0169804	6	Vesicle/virulence and Translate/growth Net	0.0310284	58	Translation/growth Net	0.0334085	6	EIF3C_BOTFB, Eukaryotic translation initiation factor 3 subunit C	C:multi-eIF complex; F:translation initiation factor activity; P:formation of translation preinitiation complex; C:cytoplasmic stress granule; C:eukaryotic 43S preinitiation complex; C:eukaryotic 48S preinitiation complex; F:translation initiation factor binding; P:regulation of translational initiation; C:eukaryotic translation initiation factor 3 complex
Bcin03g06970.1	Translation/growth Net	0.00211274	70	Vesicle/virulence and Translate/growth Net	0.00430565	110	Translation/growth Net	0.00523091	75	40S ribosomal S14 [Botrytis cinerea ]	F:structural constituent of ribosome; C:intracellular ribonucleoprotein complex; C:ribosome; P:translation
Bcin03g06990.1	Translation/growth Net	0.00196772	77	Vesicle/virulence and Translate/growth Net	0.00208254	109	Translation/growth Net	0.00498599	82	40S ribosomal S16 [Botrytis cinerea ]	F:structural constituent of ribosome; C:intracellular ribonucleoprotein complex; C:ribosome; P:translation
Bcin03g07110.1	Translation/growth Net	0.00436254	86	Vesicle/virulence and Translate/growth Net	0.00062626	103	Translation/growth Net	0.0490517	86	40S ribosomal S22 [Botrytis cinerea ]	F:structural constituent of ribosome; C:intracellular ribonucleoprotein complex; C:ribosome; P:translation
Bcin03g07120.1	Translation/growth Net	0.00169174	79	Vesicle/virulence and Translate/growth Net	9.19e-05	90	Translation/growth Net	0.00154975	81	40S ribosomal S12	F:structural constituent of ribosome; C:intracellular ribonucleoprotein complex; C:ribosome; P:translation
Bcin03g07460.1	Translation/growth Net	0.00072339	73	Vesicle/virulence and Translate/growth Net	0.0156148	126	Translation/growth Net	0.00246935	73	60S ribosomal L25 [Botrytis cinerea ]	F:nucleotide binding; F:structural constituent of ribosome; C:ribosome; P:translation
Bcin03g07630.1	Translation/growth Net	0.0259521	94	Vesicle/virulence and Translate/growth Net	0.00303156	110	Translation/growth Net	0.00382278	86	60S ribosomal L7 [Botrytis cinerea ]	C:ribosome
Bcin03g09280.1	Translation/growth Net	0.0004631	8	Vesicle/virulence and Translate/growth Net	3.28e-06	12	Translation/growth Net	5.57e-06	19	saccharopine reductase [Botrytis cinerea ]	F:oxidoreductase activity; P:oxidation-reduction process
Bcin04g00540.1	Translation/growth Net	0.0067656	88	Vesicle/virulence and Translate/growth Net	0.00425741	118	Translation/growth Net	0.00213994	86	60s ribosomal l19 [Botrytis cinerea 1]	F:structural constituent of ribosome; C:intracellular ribonucleoprotein complex; C:ribosome; C:intracellular; P:translation
Bcin04g01180.1	Translation/growth Net	0.00533882	81	Vesicle/virulence and Translate/growth Net	0.014512	123	Translation/growth Net	0.00439469	80	60S ribosomal L18 [Botrytis cinerea ]	F:structural constituent of ribosome; C:ribosome; C:intracellular; P:translation
Bcin04g03100.1	Translation/growth Net	0.00011491	3	Vesicle/virulence and Translate/growth Net	0.00033857	69	Translation/growth Net	0	10	ketol-acid mitochondrial precursor [Botrytis cinerea ]	P:isoleucine biosynthetic process; F:metal ion binding; P:valine biosynthetic process; C:mitochondrion; P:oxidation-reduction process; F:ketol-acid reductoisomerase activity; F:isomerase activity
Bcin04g04290.1	Translation/growth Net	0.00293602	84	Vesicle/virulence and Translate/growth Net	3.78e-05	89	Translation/growth Net	0.00145266	84	60s acidic ribosomal p1	F:structural constituent of ribosome; C:intracellular ribonucleoprotein complex; C:ribosome; P:translational elongation; C:intracellular
Bcin04g04500.1	Translation/growth Net	0.0767404	5	Vesicle/virulence and Translate/growth Net	0.00723044	6	Translation/growth Net	0	1	outer mitochondrial membrane porin [Botrytis cinerea ]	F:voltage-gated anion channel activity; P:regulation of anion transmembrane transport; P:transmembrane transport; C:mitochondrial outer membrane; P:anion transport
Bcin04g05070.1	Translation/growth Net	0.00268049	84	Vesicle/virulence and Translate/growth Net	0.00565179	119	Translation/growth Net	0.00310303	86	40S ribosomal S6 [Botrytis cinerea ]	F:structural constituent of ribosome; C:intracellular ribonucleoprotein complex; C:ribosome; C:intracellular; P:translation
Bcin04g05190.1	Translation/growth Net	0.00370183	86	Vesicle/virulence and Translate/growth Net	0.00103798	105	Translation/growth Net	0.00244506	85	hypothetical protein BofuT4_P093820.1	F:structural constituent of ribosome; C:intracellular ribonucleoprotein complex; C:ribosome; C:intracellular; P:translation
Bcin04g05440.1	Translation/growth Net	0.00208131	80	Vesicle/virulence and Translate/growth Net	0.00107383	104	Translation/growth Net	0.00039899	75	40S ribosomal S23 [Botrytis cinerea ]	F:structural constituent of ribosome; C:intracellular ribonucleoprotein complex; C:small ribosomal subunit; C:ribosome; C:intracellular; P:translation
Bcin04g05810.1	Translation/growth Net	0	1	Vesicle/virulence and Translate/growth Net	0.00688459	67	Translation/growth Net	0	1	Poh1 peptidase [Botrytis cinerea T4]	F:translation initiation factor activity; P:formation of translation preinitiation complex; C:eukaryotic 43S preinitiation complex; C:eukaryotic 48S preinitiation complex; P:regulation of translational initiation; C:eukaryotic translation initiation factor 3 complex
Bcin05g00180.1	Translation/growth Net	0.0973961	72	Vesicle/virulence and Translate/growth Net	0.0399065	116	Translation/growth Net	0.0763735	53	hypothetical protein BofuT4P114000012001	F:ATP binding
Bcin05g01600.1	Translation/growth Net	0.00967797	88	Vesicle/virulence and Translate/growth Net	0.0025553	107	Translation/growth Net	0.0024565	85	hypothetical protein BofuT4_P064120.1	F:structural constituent of ribosome; C:ribosome; P:translation
Bcin05g02580.1	Translation/growth Net	0.00298496	83	Vesicle/virulence and Translate/growth Net	0.00027076	95	Translation/growth Net	0.00075587	81	60S ribosomal L23	F:structural constituent of ribosome; C:intracellular ribonucleoprotein complex; C:cytosolic large ribosomal subunit; C:ribosome; F:large ribosomal subunit rRNA binding; P:translation
Bcin05g05820.1	Translation/growth Net	0.00477841	81	Vesicle/virulence and Translate/growth Net	0.00413066	112	Translation/growth Net	0.00382804	85	40S ribosomal S0 [Botrytis cinerea ]	F:structural constituent of ribosome; C:cytosolic small ribosomal subunit; P:ribosomal small subunit assembly; P:translation
Bcin05g06070.1	Translation/growth Net	0.00071356	49	Vesicle/virulence and Translate/growth Net	2.37e-05	81	Translation/growth Net	0.00042836	69	60S ribosomal L38 [Botrytis cinerea ]	F:structural constituent of ribosome; C:ribosome; P:translation
Bcin05g06130.1	Translation/growth Net	0.00578397	84	Vesicle/virulence and Translate/growth Net	0.00291715	104	Translation/growth Net	0.00131519	83	hypothetical protein BofuT4_P135250.1	F:structural constituent of ribosome; C:ribosome; P:translation
Bcin05g06320.1	Translation/growth Net	0	1	Vesicle/virulence and Translate/growth Net	0	2	NA	NA	NA	mitochondrial cyclophilin 1 [Botrytis cinerea]	F:peptidyl-prolyl cis-trans isomerase activity; P:protein peptidyl-prolyl isomerization; P:protein folding
Bcin05g08070.1	Translation/growth Net	0.00306164	78	Vesicle/virulence and Translate/growth Net	0.0063985	99	Translation/growth Net	0.00068199	80	40S ribosomal S21	C:cytosolic small ribosomal subunit; P:endonucleolytic cleavage in ITS1 to separate SSU-rRNA from 5.8S rRNA and LSU-rRNA from tricistronic rRNA transcript (SSU-rRNA, 5.8S rRNA, LSU-rRNA); P:rRNA processing; C:ribosome; C:intracellular; P:translation; C:nucleus; P:endonucleolytic cleavage to generate mature 3'-end of SSU-rRNA from (SSU-rRNA, 5.8S rRNA, LSU-rRNA); F:structural constituent of riboso…
Bcin06g00260.1	Translation/growth Net	0.00274789	11	Vesicle/virulence and Translate/growth Net	0.00031382	55	NA	NA	NA	heat shock [Botrytis cinerea T4]	F:nucleotide binding; F:ATP binding
Bcin06g00380.1	Translation/growth Net	0.00093811	78	Vesicle/virulence and Translate/growth Net	0.00101085	106	Translation/growth Net	0.00085611	82	40S ribosomal S11 [Botrytis cinerea ]	F:structural constituent of ribosome; C:ribosome; P:translation
Bcin06g02300.1	Translation/growth Net	0	23	NA	NA	NA	Translation/growth Net	0	2	isopropylmalate dehydrogenase [Botrytis cinerea T4]	F:magnesium ion binding; F:oxidoreductase activity, acting on the CH-OH group of donors, NAD or NADP as acceptor; F:NAD binding; P:oxidation-reduction process
Bcin06g02890.1	Translation/growth Net	0.0195483	49	Vesicle/virulence and Translate/growth Net	0.00248803	101	Translation/growth Net	0.00013917	61	40S ribosomal S27	F:structural constituent of ribosome; C:intracellular ribonucleoprotein complex; C:cytosolic small ribosomal subunit; F:metal ion binding; P:ribosomal small subunit assembly; C:ribosome; C:intracellular; P:translation
Bcin06g03350.1	Translation/growth Net	0.00405072	88	Vesicle/virulence and Translate/growth Net	0.00340276	113	Translation/growth Net	0.00330886	87	60S ribosomal L13 [Botrytis cinerea ]	F:structural constituent of ribosome; C:ribosome; C:intracellular; P:translation
Bcin06g05860.1	Translation/growth Net	0.00472403	87	Vesicle/virulence and Translate/growth Net	0.00042565	95	Translation/growth Net	0.00100533	76	40S ribosomal S13 [Botrytis cinerea ]	F:structural constituent of ribosome; C:intracellular ribonucleoprotein complex; C:ribosome; C:intracellular; P:translation
Bcin06g06330.1	Translation/growth Net	0.00480099	88	Vesicle/virulence and Translate/growth Net	0.00763004	119	Translation/growth Net	0.00586523	87	60S acidic ribosomal P0 [Botrytis cinerea T4]	C:intracellular ribonucleoprotein complex; P:ribosome biogenesis; C:ribosome; C:intracellular
Bcin07g00520.1	Translation/growth Net	0.00157338	81	Vesicle/virulence and Translate/growth Net	0.00013738	91	Translation/growth Net	0.00129823	80	60S ribosomal L27 [Botrytis cinerea ]	F:structural constituent of ribosome; C:intracellular ribonucleoprotein complex; C:cytosolic large ribosomal subunit; C:ribosome; C:intracellular; P:translation
Bcin07g01150.1	Translation/growth Net	0.00114771	23	Vesicle/virulence and Translate/growth Net	0.0002559	92	Translation/growth Net	0.00036247	69	hypothetical protein sscle_01g005340	F:protein binding; F:structural constituent of ribosome; C:ribosome; P:translation
Bcin07g01170.1	Translation/growth Net	0.00250729	77	Vesicle/virulence and Translate/growth Net	0.0142635	114	Translation/growth Net	0.00416741	55	translation initiation factor eIF-5A	P:positive regulation of translational termination; F:RNA binding; F:translation elongation factor activity; F:ribosome binding; P:translational frameshifting; P:positive regulation of translational elongation
Bcin07g01540.1	Translation/growth Net	0	4	Vesicle/virulence and Translate/growth Net	0.0361333	96	Translation/growth Net	0	7	elongation factor 2 [Botrytis cinerea T4]	F:GTP binding; F:translation elongation factor activity; F:GTPase activity; P:translational elongation
Bcin07g04690.1	Translation/growth Net	0	1	Vesicle/virulence and Translate/growth Net	0.0681161	41	Translation/growth Net	0.0320248	3	ATP synthase gamma chain [Botrytis cinerea T4]	F:ATPase activity; P:small molecule metabolic process; F:transmembrane transporter activity; C:protein complex; P:cellular nitrogen compound metabolic process; P:biosynthetic process; C:intracellular
Bcin07g06230.1	Translation/growth Net	0	9	Vesicle/virulence and Translate/growth Net	0	10	NA	NA	NA	eukaryotic translation initiation factor subunit 4 [Botrytis cinerea ]	F:nucleotide binding; C:multi-eIF complex; F:translation initiation factor activity; P:formation of translation preinitiation complex; C:eukaryotic 43S preinitiation complex; C:eukaryotic 48S preinitiation complex; P:regulation of translational initiation; P:translation reinitiation; C:eukaryotic translation initiation factor 3 complex
Bcin08g00760.1	Translation/growth Net	0.0005621	72	Vesicle/virulence and Translate/growth Net	0.00100472	82	Translation/growth Net	1.34e-05	43	40S ribosomal S29 [Botrytis cinerea ]	F:structural constituent of ribosome; C:ribosome; P:translation
Bcin08g01510.1	Translation/growth Net	0.00075813	50	Vesicle/virulence and Translate/growth Net	0.00523626	114	Translation/growth Net	0.00265236	44	ribosome associated chaperone Zuotin [Botrytis cinerea T4]
Bcin08g02490.1	Translation/growth Net	0.0143432	91	Vesicle/virulence and Translate/growth Net	0.0033019	110	Translation/growth Net	0.00267267	86	60S ribosomal L32 [Botrytis cinerea ]	F:structural constituent of ribosome; C:ribosome; P:translation
Bcin08g03530.1	Translation/growth Net	0.0502323	77	Vesicle/virulence and Translate/growth Net	0.00044572	99	Translation/growth Net	0.00078746	81	60S ribosomal L34	F:RNA binding; F:structural constituent of ribosome; P:ribosome biogenesis; C:cytosolic large ribosomal subunit; P:translation
Bcin08g03610.1	Translation/growth Net	0	1	Vesicle/virulence and Translate/growth Net	0.00017262	21	NA	NA	NA	subunit IV of cytochrome c oxidase [Botrytis cinerea ]	F:transmembrane transporter activity; F:oxidoreductase activity; C:mitochondrion
Bcin08g04170.1	Translation/growth Net	0	1	Vesicle/virulence and Translate/growth Net	0	10	NA	NA	NA	translation initiation factor eIF4B	F:nucleotide binding; F:translation initiation factor activity; P:translational initiation; P:eukaryotic translation initiation factor 4F complex assembly
Bcin09g00280.1	Translation/growth Net	0	2	Vesicle/virulence and Translate/growth Net	0.00412723	65	Translation/growth Net	0	1	zinc knuckle domain-containing [Botrytis cinerea T4]	F:nucleic acid binding; F:zinc ion binding
Bcin09g02490.1	Translation/growth Net	0.00274838	47	Vesicle/virulence and Translate/growth Net	0.00046999	97	Translation/growth Net	0.0009018	75	60S ribosomal L44	F:structural constituent of ribosome; C:cytosolic large ribosomal subunit; P:translation
Bcin09g03550.1	Translation/growth Net	0.0050384	89	Vesicle/virulence and Translate/growth Net	0.0006355	101	Translation/growth Net	0.00310232	85	60S ribosomal L14 [Botrytis cinerea ]	F:structural constituent of ribosome; C:ribosome; P:translation
Bcin09g03560.1	Translation/growth Net	0.0178551	80	Vesicle/virulence and Translate/growth Net	0.00667998	106	Translation/growth Net	0.00058195	79	nascent polypeptide-associated complex alpha polypeptide [Botrytis cinerea ]	C:nucleus; C:cytoplasm; P:protein transport
Bcin09g04950.1	Translation/growth Net	5.65e-05	52	Vesicle/virulence and Translate/growth Net	2.51e-05	88	Translation/growth Net	1.06e-05	64	40S ribosomal S30 [Botrytis cinerea ]	F:structural constituent of ribosome; C:ribosome; P:translation
Bcin09g05600.1	Translation/growth Net	0.00381443	84	Vesicle/virulence and Translate/growth Net	0.00070452	106	Translation/growth Net	0.0025541	85	60S ribosomal L30 [Botrytis cinerea ]	F:structural constituent of ribosome; C:ribosome; P:translation
Bcin09g05760.1	Translation/growth Net	0.0043022	14	Vesicle/virulence and Translate/growth Net	0.00229697	63	Translation/growth Net	0.00059966	18	elongation factor 1-alpha [Botrytis cinerea ]	F:nucleotide binding; F:GTP binding; F:translation elongation factor activity; C:cytoplasm; F:GTPase activity; P:translational elongation
Bcin09g05760.2	Translation/growth Net	0.0043022	14	Vesicle/virulence and Translate/growth Net	0.00246457	62	Translation/growth Net	0.00028107	14	elongation factor 1-alpha [Botrytis cinerea ]	F:GTP binding; F:translation elongation factor activity; C:cytoplasm; F:GTPase activity; P:translational elongation
Bcin09g06450.1	Translation/growth Net	2.12e-06	48	Vesicle/virulence and Translate/growth Net	0.001155	89	Translation/growth Net	1.39e-05	53	NACB_SCLS1, Nascent polypeptide-associated complex subunit beta	C:nucleus; C:cytoplasm; P:transcription, DNA-templated; P:protein transport; P:regulation of transcription, DNA-templated
Bcin09g06480.1	Translation/growth Net	0.00395966	83	Vesicle/virulence and Translate/growth Net	0.0101565	121	Translation/growth Net	0.00290669	85	60S ribosomal L24 [Botrytis cinerea ]	C:ribosome
Bcin10g01260.1	Translation/growth Net	0.0014173	77	Vesicle/virulence and Translate/growth Net	0.0177427	121	Translation/growth Net	0.0284275	83	60S ribosomal L16 [Botrytis cinerea ]	F:structural constituent of ribosome; C:large ribosomal subunit; P:translation
Bcin10g01500.1	Translation/growth Net	0.0265374	3	Vesicle/virulence and Translate/growth Net	0.014307	91	Translation/growth Net	0.183402	9	ATP synthase 9 [Botrytis cinerea ]	F:hydrogen ion transmembrane transporter activity; P:ATP hydrolysis coupled proton transport; C:proton-transporting ATP synthase complex, coupling factor F(o); C:integral component of membrane; P:ATP synthesis coupled proton transport
Bcin10g03580.1	Translation/growth Net	0.00013019	25	Vesicle/virulence and Translate/growth Net	3.18e-05	71	Translation/growth Net	3.31e-05	32	60S ribosomal L29 [Botrytis cinerea ]	F:structural constituent of ribosome; C:ribosome; P:translation
Bcin10g03820.1	Translation/growth Net	0	2	Vesicle/virulence and Translate/growth Net	0.0546513	86	Translation/growth Net	0.00052402	4	eukaryotic translation initiation factor 3 subunit a	F:translation initiation factor activity; P:formation of translation preinitiation complex; C:eukaryotic 43S preinitiation complex; C:eukaryotic 48S preinitiation complex; P:regulation of translational initiation; C:eukaryotic translation initiation factor 3 complex
Bcin10g04220.1	Translation/growth Net	0	1	Vesicle/virulence and Translate/growth Net	0	4	NA	NA	NA	translationally-controlled tumor	no GO terms
Bcin10g04290.1	Translation/growth Net	0.00292366	84	Vesicle/virulence and Translate/growth Net	0.00037614	97	Translation/growth Net	0.00324354	87	60S ribosomal L17	F:structural constituent of ribosome; C:large ribosomal subunit; C:ribosome; C:intracellular; P:translation
Bcin10g04300.1	Translation/growth Net	0.004709	88	Vesicle/virulence and Translate/growth Net	0.0035518	106	Translation/growth Net	0.033048	83	40S ribosomal S18	F:RNA binding; F:structural constituent of ribosome; C:cytosol; P:ribosome biogenesis; C:ribosome; P:translation
Bcin10g04590.1	Translation/growth Net	0.0041622	83	Vesicle/virulence and Translate/growth Net	0.00229698	100	Translation/growth Net	0.00096025	76	60S ribosomal L12	F:structural constituent of ribosome; C:cytosolic large ribosomal subunit; F:rRNA binding; P:ribosomal large subunit assembly; P:translation
Bcin10g04610.1	Translation/growth Net	0.0190703	85	Vesicle/virulence and Translate/growth Net	0.00098245	106	Translation/growth Net	0.0276537	88	40S ribosomal S7 [Botrytis cinerea ]	F:structural constituent of ribosome; C:ribosome; P:translation
Bcin10g05430.1	Translation/growth Net	0.00456274	80	Vesicle/virulence and Translate/growth Net	0.0109673	120	Translation/growth Net	0.0254467	89	40S ribosomal S3 [Botrytis cinerea ]	F:RNA binding; F:structural constituent of ribosome; C:small ribosomal subunit; P:translation
Bcin10g06010.1	Translation/growth Net	0.00172713	64	Vesicle/virulence and Translate/growth Net	0.00266284	111	Translation/growth Net	0.0163394	77	telomere and ribosome associated stm1 [Botrytis cinerea 1]	no GO terms
Bcin11g03280.1	Translation/growth Net	0.00519366	88	Vesicle/virulence and Translate/growth Net	0.00036595	95	Translation/growth Net	0.0344869	83	hypothetical protein BofuT4_P149590.1	F:structural constituent of ribosome; C:ribosome; P:translation
Bcin11g04420.1	Translation/growth Net	0.0325596	50	Vesicle/virulence and Translate/growth Net	0.0149898	114	Translation/growth Net	0.00150313	51	elongation factor 1-beta	F:translation elongation factor activity; P:translational elongation; C:eukaryotic translation elongation factor 1 complex
Bcin11g05170.1	Translation/growth Net	9.82e-05	2	Vesicle/virulence and Translate/growth Net	0	3	NA	NA	NA	EIF3H_BOTFB, Eukaryotic translation initiation factor 3 subunit H	F:translation initiation factor activity; P:formation of translation preinitiation complex; C:eukaryotic 43S preinitiation complex; C:eukaryotic 48S preinitiation complex; C:eukaryotic translation initiation factor 3 complex
Bcin11g05900.1	Translation/growth Net	0.00142593	80	Vesicle/virulence and Translate/growth Net	0.00285053	106	Translation/growth Net	0.00381712	85	60S ribosomal L6 [Botrytis cinerea ]	F:structural constituent of ribosome; C:ribosome; P:translation
Bcin11g05920.1	Translation/growth Net	0.00902566	89	Vesicle/virulence and Translate/growth Net	0.00615641	116	Translation/growth Net	0.0401035	86	60S ribosomal L9 [Botrytis cinerea ]	F:structural constituent of ribosome; C:ribosome; F:rRNA binding; P:translation
Bcin12g01300.1	Translation/growth Net	0.00812579	61	Vesicle/virulence and Translate/growth Net	0.00107315	100	Translation/growth Net	0.0011349	79	40S ribosomal S17 [Botrytis cinerea ]	F:structural constituent of ribosome; C:ribosome; P:translation
Bcin12g05210.1	Translation/growth Net	0	1	Vesicle/virulence and Translate/growth Net	0.00889612	76	Translation/growth Net	0.0311983	2	malate dehydrogenase [Botrytis cinerea T4]	P:carbohydrate metabolic process; F:L-malate dehydrogenase activity; P:malate metabolic process; P:tricarboxylic acid cycle
Bcin13g00550.1	Translation/growth Net	0	1	Vesicle/virulence and Translate/growth Net	0.139783	54	NA	NA	NA	curved DNA-binding [Botrytis cinerea T4]	F:DNA binding; F:hydrolase activity
Bcin13g00830.1	Translation/growth Net	0.0029134	79	Vesicle/virulence and Translate/growth Net	0.00086509	97	Translation/growth Net	0.0015535	82	60s ribosomal l37a [Botrytis cinerea T4]	F:structural constituent of ribosome; C:ribosome; P:translation
Bcin13g02240.1	Translation/growth Net	0	2	Vesicle/virulence and Translate/growth Net	0.00341782	10	NA	NA	NA	importin subunit beta-4 [Botrytis cinerea T4]	P:intracellular protein transport; F:binding; F:Ran GTPase binding
Bcin13g03600.1	Translation/growth Net	0.00419176	76	Vesicle/virulence and Translate/growth Net	0.00035987	95	Translation/growth Net	0.0174754	80	60S ribosomal L26 [Botrytis cinerea ]	F:structural constituent of ribosome; C:large ribosomal subunit; P:translation
Bcin14g02020.1	Translation/growth Net	0.00016426	54	Vesicle/virulence and Translate/growth Net	0.0772784	101	Translation/growth Net	1.71e-05	8	small nucleolar ribonucleo SNU13 [Botrytis cinerea ]	C:box C/D snoRNP complex; C:small-subunit processome; F:RNA binding; P:maturation of LSU-rRNA; P:maturation of SSU-rRNA; C:precatalytic spliceosome; C:U4/U6 x U5 tri-snRNP complex; C:viral nucleocapsid; C:cytosolic large ribosomal subunit; P:mRNA splicing, via spliceosome; P:translation
Bcin14g02680.1	Translation/growth Net	0.00075501	74	Vesicle/virulence and Translate/growth Net	0.00533052	115	Translation/growth Net	0.00307443	79	40S ribosomal S24 [Botrytis cinerea ]	F:nucleotide binding; F:structural constituent of ribosome; C:ribosome; P:translation
Bcin14g02830.1	Translation/growth Net	0.00619851	82	Vesicle/virulence and Translate/growth Net	0.0269523	126	Translation/growth Net	0.0720211	79	60S ribosomal L3 [Botrytis cinerea ]	F:structural constituent of ribosome; C:ribosome; P:translation
Bcin14g03010.1	Translation/growth Net	0.00398017	87	Vesicle/virulence and Translate/growth Net	0.0106033	111	Translation/growth Net	0.00178998	84	g- beta subunit	F:protein kinase C binding; F:GDP-dissociation inhibitor activity; P:G-protein coupled receptor signaling pathway; C:cytosolic small ribosomal subunit; P:conjugation with cellular fusion; P:invasive growth in response to glucose limitation; F:signal transducer activity; P:regulation of eIF2 alpha phosphorylation by amino acid starvation; P:positive regulation of protein autophosphorylation; F:G-p…
Bcin14g04100.1	Translation/growth Net	0.00205676	75	Vesicle/virulence and Translate/growth Net	0.00204633	98	Translation/growth Net	0.00075587	81	60S ribosomal L22 [Botrytis cinerea ]	F:structural constituent of ribosome; C:ribosome; P:translation
Bcin14g04230.1	Translation/growth Net	0.00615323	88	Vesicle/virulence and Translate/growth Net	0.00343991	106	Translation/growth Net	0.00395094	88	60S ribosomal L5 [Botrytis cinerea ]	F:structural constituent of ribosome; F:5S rRNA binding; C:ribosome; C:intracellular; P:translation
Bcin14g04590.1	Translation/growth Net	0.00077293	74	Vesicle/virulence and Translate/growth Net	0.0131057	112	Translation/growth Net	0.00092906	71	40s ribosomal s10b [Botrytis cinerea 1]	C:ribosome
Bcin14g04790.1	Translation/growth Net	0.00563614	84	Vesicle/virulence and Translate/growth Net	0.00418219	115	Translation/growth Net	0.00157512	81	60s ribosomal l15 [Botrytis cinerea 1]	F:structural constituent of ribosome; C:ribosome; P:translation
Bcin15g01120.1	Translation/growth Net	0.015748	4	Vesicle/virulence and Translate/growth Net	0.0604446	32	Translation/growth Net	0.0488292	4	ATP synthase subunit alpha [Botrytis cinerea T4]	C:proton-transporting ATP synthase complex, catalytic core F(1); F:ATP binding; P:ATP hydrolysis coupled proton transport; F:proton-transporting ATPase activity, rotational mechanism; P:ATP synthesis coupled proton transport; F:proton-transporting ATP synthase activity, rotational mechanism
Bcin15g02080.1	Translation/growth Net	0.0324919	5	Vesicle/virulence and Translate/growth Net	0.0612344	30	Translation/growth Net	0.0614325	2	mitochondrial ATP synthase beta subunit [Botrytis cinerea T4]	C:proton-transporting ATP synthase complex, catalytic core F(1); F:ATP binding; P:ATP hydrolysis coupled proton transport; P:ATP synthesis coupled proton transport; F:proton-transporting ATP synthase activity, rotational mechanism
Bcin15g04490.1	Translation/growth Net	0	23	Vesicle/virulence and Translate/growth Net	0.0152932	83	Translation/growth Net	0	1	EIF3D_BOTFB, Eukaryotic translation initiation factor 3 subunit D	F:translation initiation factor activity; P:formation of translation preinitiation complex; C:eukaryotic 43S preinitiation complex; C:eukaryotic 48S preinitiation complex; P:regulation of translational initiation; C:eukaryotic translation initiation factor 3 complex
Bcin16g03140.1	Translation/growth Net	0	2	Vesicle/virulence and Translate/growth Net	0.00605303	26	Translation/growth Net	0.0329201	8	centromere microtubule binding CBF5 [Botrytis cinerea ]	P:pseudouridine synthesis; F:RNA binding; P:RNA processing; F:pseudouridine synthase activity
Bcin16g04810.1	Translation/growth Net	0.00097451	72	Vesicle/virulence and Translate/growth Net	0.00152946	111	Translation/growth Net	0.00196148	84	60S ribosomal L28 [Botrytis cinerea ]	F:structural constituent of ribosome; C:ribosome; P:translation
Bcin01g00010.1	BOA Net	0.0316501	12	BOA Net	0.0211408	11	BOA Net	0.0876504	14	BcBOA1, nmra-like family	no GO terms
Bcin01g00020.1	BOA Net	0.00137363	9	BOA Net	0	7	BOA Net	0	9	BcBOA2, monooxygenase	F:NADP binding; F:oxidoreductase activity; F:flavin adenine dinucleotide binding; P:oxidation-reduction process; F:N,N-dimethylaniline monooxygenase activity
Bcin01g00030.1	BOA Net	0.0467992	13	BOA Net	0.0619309	13	BOA Net	0.0107274	13	BcBOA3, cytochrome P40 monooxygenase [Botrytis cinerea]	F:iron ion binding; F:oxidoreductase activity, acting on paired donors, with incorporation or reduction of molecular oxygen; C:integral component of membrane; P:oxidation-reduction process; F:monooxygenase activity; F:heme binding
Bcin01g00040.1	BOA Net	0.00893947	11	BOA Net	0.0371272	12	BOA Net	0.0107274	13	BcBOA4, cytochrome P450 monooxygenase	F:iron ion binding; F:oxidoreductase activity, acting on paired donors, with incorporation or reduction of molecular oxygen; C:integral component of membrane; P:oxidation-reduction process; F:monooxygenase activity; F:heme binding
Bcin01g00050.1	BOA Net	0.001221	7	BOA Net	0	6	BOA Net	0.003663	12	BcBOA5, Polyketide synthase, enoylreductase domain	F:zinc ion binding; F:oxidoreductase activity; P:oxidation-reduction process
Bcin01g00060.1	BOA Net	0.0467992	13	BOA Net	0.0619309	13	BOA Net	0.0107274	13	BcBOA6, Polyketide synthase	F:catalytic activity; P:metabolic process; F:phosphopantetheine binding
Bcin01g00070.1	BOA Net	0.0139717	11	BOA Net	0.0317112	12	BOA Net	0.00549451	12	BcBOA7, P450 monooxygenase	F:iron ion binding; F:oxidoreductase activity, acting on paired donors, with incorporation or reduction of molecular oxygen; C:integral component of membrane; P:oxidation-reduction process; F:monooxygenase activity; F:heme binding
Bcin01g00080.1	BOA Net	0.0316501	12	BOA Net	0.0443485	12	BOA Net	0.0107274	13	BcBOA8	F:FAD binding; F:oxidoreductase activity; C:integral component of membrane; P:oxidation-reduction process
Bcin01g00090.1	BOA Net	0.0467992	13	BOA Net	0.0317112	12	BOA Net	0.0107274	13	BcBOA9, Polyketide synthase	F:oxidoreductase activity; F:catalytic activity; P:metabolic process; P:oxidation-reduction process
Bcin01g00100.1	BOA Net	0.00593058	10	BOA Net	0	9	BOA Net	0.003663	12	BcBOA10, Thioesterase	F:hydrolase activity, acting on ester bonds; P:biosynthetic process
Bcin01g00110.1	BOA Net	0.00470958	9	BOA Net	0	9	BOA Net	0	11	BcBOA11, Transferase	F:transferase activity, transferring acyl groups other than amino-acyl groups
Bcin01g00120.1	BOA Net	0.0348814	12	BOA Net	0.0177917	11	BOA Net	0.0107274	13	BcBOA12, trichothecene 3-o-acetyltransferase	F:transferase activity, transferring acyl groups other than amino-acyl groups
Bcin01g00130.1	BOA Net	0	8	BOA Net	0	4	BOA Net	0	8	BcBOA13, Zn(2)-C6 fungal-type DNA-binding domain	C:nucleus; F:transcription factor activity, sequence-specific DNA binding; F:zinc ion binding; P:regulation of transcription, DNA-templated; F:RNA polymerase II transcription factor activity, sequence-specific DNA binding; P:regulation of transcription from RNA polymerase II promoter
Bcin10g05850.1	BOA Net	0	1	BOA Net	0	1	BOA Net	0	2	Alcohol acetyltransferase/N-acetyltransferase	no GO terms
Bcin10g05870.1	BOA Net	0.142857	7	BOA Net	0.142857	8	BOA Net	0.0549451	12	cytochrome p450 monooxygenase	F:iron ion binding; F:oxidoreductase activity, acting on paired donors, with incorporation or reduction of molecular oxygen; C:integral component of membrane; P:oxidation-reduction process; F:monooxygenase activity; F:heme binding
Bcin01g00440.1	Exocytosis regulation Net	0.003367	11	Exocytosis regulation Net	0.0223846	11	Exocytosis regulation Net	0.0135883	12	Fatty acid synthase alpha subunit	F:magnesium ion binding; P:long-chain fatty acid biosynthetic process; F:catalytic activity; P:metabolic process; P:fatty acid biosynthetic process; F:holo-[acyl-carrier-protein] synthase activity; F:fatty acid synthase activity
Bcin01g00700.1	Exocytosis regulation Net	0.003367	11	Exocytosis regulation Net	0.0223846	11	Exocytosis regulation Net	0.0135883	12	predicted protein	no GO terms
Bcin01g00760.1	Exocytosis regulation Net	0.003367	11	Exocytosis regulation Net	0.0231421	11	Exocytosis regulation Net	0.0135883	12	hypothetical protein BC1G_14345, Elongator complex protein 6	C:Elongator holoenzyme complex
Bcin01g04140.1	Exocytosis regulation Net	0.003367	11	Exocytosis regulation Net	0.0125	10	Exocytosis regulation Net	0	9	predicted protein	no IPS match
Bcin01g05900.1	Exocytosis regulation Net	0.0791246	12	Exocytosis regulation Net	0.0231421	11	Exocytosis regulation Net	0.0135883	12	integral membrane	C:integral component of membrane
Bcin01g06380.1	Exocytosis regulation Net	0	9	Exocytosis regulation Net	0	6	Exocytosis regulation Net	0	9	predicted protein	no GO terms
Bcin01g06410.1	Exocytosis regulation Net	0.003367	11	Exocytosis regulation Net	0.0125	10	Exocytosis regulation Net	0.0135883	12	c2 domain-containing [Botrytis cinerea 1]	F:protein binding; P:regulation of exocytosis; F:Rab GTPase binding
Bcin01g10300.1	Exocytosis regulation Net	0	10	Exocytosis regulation Net	0	6	Exocytosis regulation Net	0	9	AIG1-like protein; GTP binding; hydrolase activity; hypothetical protein BC1G_05279	C:integral component of membrane
Bcin01g10470.1	Exocytosis regulation Net	0.003367	11	Exocytosis regulation Net	0.0149351	10	Exocytosis regulation Net	0.00757576	11	Bcbem3; Rho GTPase activation protein; hypothetical protein BC1G_05255	P:signal transduction
Bcin03g04720.1	Exocytosis regulation Net	0	10	Exocytosis regulation Net	0	7	Exocytosis regulation Net	0.0016835	10	hypothetical protein BcDW1_650	no GO terms
Bcin13g02610.1	Exocytosis regulation Net	0.0791246	12	Exocytosis regulation Net	0.0443543	12	Exocytosis regulation Net	0.0135883	12	predicted protein	no GO terms
Bcin14g01870.1	Exocytosis regulation Net	0	2	Exocytosis regulation Net	0.00757576	9	Exocytosis regulation Net	0.0016835	10	Bchhk5; Signal transduction histidine kinase; putative hsp90-like protein	F:phosphorelay sensor kinase activity; P:phosphorelay signal transduction system; C:integral component of membrane; P:signal transduction by protein phosphorylation; C:intracellular
Bcin14g04970.1	Exocytosis regulation Net	0.003367	11	Exocytosis regulation Net	0.0443543	12	Exocytosis regulation Net	0.0135883	12	Cytochrome P450; hypothetical protein sscle_16g110780	F:oxidoreductase activity, acting on paired donors, with incorporation or reduction of molecular oxygen; F:iron ion binding; P:oxidation-reduction process; F:heme binding
Bcin01g11450.1	Cyclic peptide Net	0.0625	7	Cyclic peptide Net	0.0548942	9	Cyclic peptide Net	0.00694444	9	Bcnprs7; AMP-dependent synthetase/ligase	F:catalytic activity; P:metabolic process, AMP-dependent synthetase/ligase, AMP-binding enzyme, C-terminal domain
Bcin01g11460.1	Cyclic peptide Net	0.236111	7	Cyclic peptide Net	0.0416667	8	Cyclic peptide Net	0.00347222	8	transmembrane helices; predicted protein	no GO terms
Bcin01g11470.1	Cyclic peptide Net	0	5	Cyclic peptide Net	0.0548942	9	Cyclic peptide Net	0.00694444	9	lccl domain-containing	no GO terms
Bcin01g11470.2	Cyclic peptide Net	0.0347222	6	Cyclic peptide Net	0.0271164	7	Cyclic peptide Net	0.00694444	9	lccl domain-containing	no GO terms
Bcin01g11480.1	Cyclic peptide Net	0.0578704	7	Cyclic peptide Net	0.00396825	7	Cyclic peptide Net	0.00347222	8	Bifunctional cytochrome P450/NADPH--cytochrome P450 reductase	no GO terms
Bcin01g11490.1	Cyclic peptide Net	0.106481	8	Cyclic peptide Net	0.00925926	7	Cyclic peptide Net	0.00694444	9	putative o-methyltransferase protein	F:O-methyltransferase activity; P:methylation
Bcin01g11500.1	Cyclic peptide Net	0	1	Cyclic peptide Net	0	4	Cyclic peptide Net	0.00347222	8	alpha beta hydrolase fold	F:hydrolase activity
Bcin01g11520.1	Cyclic peptide Net	0.025463	5	Cyclic peptide Net	0.0132275	8	Cyclic peptide Net	0.00347222	8	microcystin synthetase, S-adenosyl-L-methionine-dependent methyltransferase [Botrytis cinerea T4]	no GO terms
Bcin01g11530.1	Cyclic peptide Net	0.0162037	4	Cyclic peptide Net	0.0132275	8	Cyclic peptide Net	0.00694444	9	Polyketide synthase, enoylreductase domain, oxidoreductase [Botrytis cinerea T4]	F:zinc ion binding; F:oxidoreductase activity; P:oxidation-reduction process
Bcin01g11550.1	Cyclic peptide Net	0.0162037	4	Cyclic peptide Net	0.00396825	7	Cyclic peptide Net	0.00694444	9	BcPKS5	F:catalytic activity; P:metabolic process; F:phosphopantetheine binding
Bcin01g07080.1	Copper transport Net	0.555556	4	Copper transport Net	0.555556	4	Copper transport Net	0.136869	9	copper transporter	F:oxidoreductase activity; F:ferric-chelate reductase activity; C:integral component of membrane; P:oxidation-reduction process
Bcin01g07090.1	Copper transport Net	0	3	Copper transport Net	0	3	Copper transport Net	0.0255051	5	ctr copper transporter family	C:integral component of membrane; F:copper ion transmembrane transporter activity; P:copper ion transmembrane transport
Bcin01g07100.1	Copper transport Net	0.222222	3	Copper transport Net	0.355556	3	Copper transport Net	0	5	ctr copper transporter family	C:integral component of membrane; F:copper ion transmembrane transporter activity; P:copper ion transmembrane transport
Bcin02g01770.1	Copper transport Net	0	2	Copper transport Net	0	1	Copper transport Net	0	5	hypothetical protein BofuT4_P108960.1	F:oxidoreductase activity, acting on the CH-OH group of donors, NAD or NADP as acceptor; F:NAD binding; P:glycerol-3-phosphate catabolic process; P:oxidation-reduction process
Bcin02g01780.1	Copper transport Net	0.0277778	3	Copper transport Net	0.2	2	Copper transport Net	0.0138889	6	S-adenosyl-L-methionine-dependent methyltransferase; hypothetical protein BC1G_02575	P:metabolic process; F:methyltransferase activity
Bcin08g04060.1	Copper transport Net	0.0972222	4	Copper transport Net	0	3	Copper transport Net	0.0522727	6	similar to gi	F:oxidoreductase activity; C:integral component of membrane; P:oxidation-reduction process
Bcin08g04070.1	Copper transport Net	0.0972222	4	Copper transport Net	0.355556	5	Copper transport Net	0.0636364	4	gpi anchored cell wall [Botrytis cinerea 1]	C:integral component of membrane
Bcin09g06090.1	Copper transport Net	0	2	Copper transport Net	0	2	Copper transport Net	0.30303	3	ctr copper transporter [Botrytis cinerea T4]	C:integral component of membrane; F:copper ion transmembrane transporter activity; P:copper ion transmembrane transport
Bcin13g05200.1	Copper transport Net	0	1	Copper transport Net	0.533333	3	Copper transport Net	0.360606	9	putative grisea protein	C:nucleus; F:DNA binding; F:transcription factor activity, sequence-specific DNA binding; F:copper ion binding; P:regulation of transcription, DNA-templated
Bcin13g05210.1	Copper transport Net	0.583333	4	Copper transport Net	0	2	Copper transport Net	0.0138889	6	Bcctr3; Ctr copper transporter; [Botrytis cinerea ]	C:integral component of membrane; F:copper ion transmembrane transporter activity; P:copper ion transmembrane transport
Bcin06g04940.1	BOT Net	0	6	BOT/IPP Net	0	5	BOT/IPP Net	0	6	retinol dehydrogenase 8; Short-chain dehydrogenase/reductase	no GO terms
Bcin12g06370.1	BOT Net	0.00793651	7	BOT/IPP Net	0.07	9	BOT/IPP Net	0.0749206	10	BcBOT4, BCL4p	F:oxidoreductase activity; F:ion binding; C:cellular_component
Bcin12g06380.1	BOT Net	0.00793651	7	BOT/IPP Net	0.0166667	8	BOT/IPP Net	0.00730159	8	BcBOT1, CND5p	F:oxidoreductase activity; F:ion binding
Bcin12g06390.1	BOT Net	0.00793651	7	BOT/IPP Net	0.0504167	9	BOT/IPP Net	0.0787302	9	BcBOT2, BOT2_BOTFU, Calcineurin-dependent 15, Sesquiterpene cyclase BOT2	P:lipid metabolic process; F:ion binding; F:lyase activity; P:biosynthetic process
Bcin12g06400.1	BOT Net	0.00793651	7	BOT/IPP Net	0.0166667	8	BOT/IPP Net	0.232063	11	BcBOT3,CND11p	F:oxidoreductase activity; F:ion binding; C:cellular_component
Bcin12g06410.1	BOT Net	0.00793651	7	BOT/IPP Net	0.0504167	9	BOT/IPP Net	0.129048	10	BcBOT5,BCL5p	F:transferase activity, transferring acyl groups
Bcin12g06420.1	BOT Net	0	6	BOT/IPP Net	0	7	BOT/IPP Net	0	6	BcBOT6, transcription factor cys6	C:nucleus; F:nucleic acid binding transcription factor activity; F:ion binding; P:cellular nitrogen compound metabolic process; P:biosynthetic process
Bcin12g06430.1	BOT Net	0.00793651	7	BOT/IPP Net	0.0166667	8	BOT/IPP Net	0.0225397	8	BcBOT7, short-chain dehydrogenase reductase SDR [Botrytis cinerea T4]	C:cellular_component
Bcin02g04930.1	Peptidase Net	0	2	Peptidase Net	0	4	Peptidase Net	0.128035	13	BcnoxB; cytochrome b-245 heavy chain subunit beta [Botrytis cinerea T4]	F:oxidoreductase activity; C:membrane; C:integral component of membrane; P:oxidation-reduction process
Bcin06g00520.1	Peptidase Net	0	3	Peptidase Net	0.019697	6	Peptidase Net	0.0131313	8	[Botrytis cinerea ]	no GO terms (signal peptide domain)
Bcin10g00380.1	Peptidase Net	0	2	Peptidase Net	0.106061	8	Peptidase Net	0.322191	16	[Botrytis cinerea ]	no GO terms
Bcin12g00180.1	Peptidase Net	0.6	5	Peptidase Net	0.140909	8	Peptidase Net	0.0642548	12	BcAP9, extracellular aspartic endopeptidase (secreted ) [Botrytis cinerea T4]	F:aspartic-type endopeptidase activity; P:proteolysis; F:peptidase activity; F:hydrolase activity
Bcin13g03660.1	Peptidase Net	0	3	Peptidase Net	0.3	9	Peptidase Net	0.0343434	9	hypothetical protein BC1G_04953	no GO terms
Bcin14g04260.1	Peptidase Net	0	3	Peptidase Net	0.0287879	6	Peptidase Net	0.230849	12	Bcgas2; Egh16-like virulence factor; regulated by Bmp1 MAP kinase cascade [Botrytis cinerea T4]	P:phosphorylation; F:kinase activity (signal peptide domain)
Bcin05g03150.1	IPP Net	0.4	2	BOT/IPP Net	0.0755556	5	BOT/IPP Net	0	2	3-hydroxy-3-methylglutaryl-coenzyme A (HMG- ) reductase isozyme [Botrytis cinerea T4]	C:endoplasmic reticulum membrane; F:NADP binding; C:integral component of membrane; P:coenzyme A metabolic process; P:oxidation-reduction process; P:isoprenoid biosynthetic process; F:hydroxymethylglutaryl-CoA reductase (NADPH) activity
Bcin05g07430.1	IPP Net	0.6	3	BOT/IPP Net	0.524167	12	BOT/IPP Net	0.077619	6	Bcerg10; acetyl-coa acetyltransferase [Botrytis cinerea T4]	F:transferase activity, transferring acyl groups other than amino-acyl groups; F:catalytic activity; P:metabolic process; F:transferase activity
Bcin11g00330.1	IPP Net	0.6	2	BOT/IPP Net	0.00916667	3	BOT/IPP Net	0.0265079	4	Bcerg13; hydroxymethylglutaryl- synthase	P:isoprenoid biosynthetic process; F:hydroxymethylglutaryl-CoA synthase activity
Bcin12g03180.1	IPP Net	0	1	NA	NA	NA	NA	NA	NA	Bccpr1	F:FMN binding; F:oxidoreductase activity; F:NADPH-hemoprotein reductase activity; P:oxidation-reduction process
Bcin13g02430.1	IPP Net	0	2	BOT/IPP Net	0.125	3	BOT/IPP Net	0	1	CND16; sterol metabolism; ATP citrate lyase subunit [Botrytis cinerea T4]	F:ATP binding; F:lyase activity
Bcin13g02440.1	IPP Net	0	2	BOT/IPP Net	0	1	BOT/IPP Net	0	1	CND6	F:catalytic activity; F:cofactor binding; P:metabolic process; F:transferase activity, transferring acyl groups, acyl groups converted into alkyl on transfer
Bcin05g02850.1	Polyketide Net	0	1	NA	NA	NA	Polyketide Net	0	2	hypothetical protein BC1G_01557	no GO terms
Bcin07g02980.1	Polyketide Net	1	4	NA	NA	NA	Polyketide Net	0.285263	11	NADPH dehydrogenase [Botrytis cinerea ]	F:FMN binding; F:oxidoreductase activity; P:oxidation-reduction process
Bcin11g00390.1	Polyketide Net	0	1	NA	NA	NA	Polyketide Net	0	2	Bcgst3; hypothetical protein BC1G_09645 [Botrytis cinerea B05.10]	F:protein binding
Bcin12g02050.1	Polyketide Net	0	1	NA	NA	NA	Polyketide Net	0	2	Polyketide synthase; zinc-binding alcohol dehydrogenase [Botrytis cinerea T4]	NA
Bcin16g03870.1	Polyketide Net	0	1	NA	NA	NA	Polyketide Net	0.0585965	7	Polyketide synthase; zinc-binding alcohol dehydrogenase [Botrytis cinerea T4]
Bcin01g00670.1	NA	NA	NA	Vesicle/virulence and Translate/growth Net	0	13	NA	NA	NA	eukaryotic translation initiation factor 2 subunit alpha [Botrytis cinerea T4]	F:nucleic acid binding; F:translation initiation factor activity; F:RNA binding; P:translational initiation
Bcin01g02050.1	NA	NA	NA	Vesicle/virulence and Translate/growth Net	0	1	NA	NA	NA	translation initiation factor 3 [Botrytis cinerea ]	F:translation initiation factor activity; P:translational initiation
Bcin01g02670.1	NA	NA	NA	Vesicle/virulence and Translate/growth Net	1.97e-06	32	NA	NA	NA	t-complex 1 [Botrytis cinerea T4]	F:nucleotide binding; F:ATP binding; C:cytoplasm; F:unfolded protein binding; P:protein folding
Bcin01g03220.1	NA	NA	NA	Vesicle/virulence and Translate/growth Net	0	1	NA	NA	NA	nop14-like family [Botrytis cinerea 1]	C:small-subunit processome
Bcin01g03270.1	NA	NA	NA	ROS/NO stress Net	0	1	NA	NA	NA	NmrA-like domain; oxidoreductase - [Botrytis cinerea 1]	no GO terms
Bcin01g03440.1	NA	NA	NA	Vesicle/virulence and Translate/growth Net	0	1	NA	NA	NA	valyl-trna synthetase	F:nucleotide binding; F:valine-tRNA ligase activity; P:tRNA aminoacylation for protein translation; F:ATP binding; F:aminoacyl-tRNA ligase activity; P:valyl-tRNA aminoacylation; P:regulation of translational fidelity; F:aminoacyl-tRNA editing activity; F:ligase activity; P:translation
Bcin01g04580.1	NA	NA	NA	Plant cell wall degradation Net	0	1	NA	NA	NA	hypothetical protein BofuT4_P163510.1	no GO terms; signal peptides
Bcin01g04580.2	NA	NA	NA	Plant cell wall degradation Net	0	1	NA	NA	NA	hypothetical protein BofuT4_P163510.1	no GO terms
Bcin01g04710.1	NA	NA	NA	Vesicle/virulence and Translate/growth Net	0	1	NA	NA	NA	PESC_BOTFB ame: Full=Pescadillo homolog ame: Full=Nucleolar 7 homolog	P:ribosome biogenesis; P:cell cycle DNA replication; P:rRNA processing; C:nucleolus; P:maturation of 5.8S rRNA from tricistronic rRNA transcript (SSU-rRNA, 5.8S rRNA, LSU-rRNA); P:cell cycle; C:nucleoplasm; P:maturation of LSU-rRNA from tricistronic rRNA transcript (SSU-rRNA, 5.8S rRNA, LSU-rRNA); P:maturation of SSU-rRNA from tricistronic rRNA transcript (SSU-rRNA, 5.8S rRNA, LSU-rRNA); C:nucleu…
Bcin01g04930.1	NA	NA	NA	ROS/NO stress Net	1	4	NA	NA	NA	hypothetical protein BC1G_13293 [Botrytis cinerea B05.10]	no GO terms
Bcin01g06220.1	NA	NA	NA	Vesicle/virulence and Translate/growth Net	5.4e-07	21	NA	NA	NA	GTP-binding nuclear ran-1 [Botrytis cinerea ]	F:nucleotide binding; F:GTP binding; P:nucleocytoplasmic transport; C:nucleus; P:small GTPase mediated signal transduction; P:signal transduction; F:GTPase activity; P:protein transport; P:intracellular protein transport; P:transport
Bcin01g06220.2	NA	NA	NA	Vesicle/virulence and Translate/growth Net	0	4	NA	NA	NA	GTP-binding nuclear ran-1 [Botrytis cinerea ]	F:nucleotide binding; F:GTP binding; P:nucleocytoplasmic transport; C:nucleus; P:small GTPase mediated signal transduction; P:signal transduction; F:GTPase activity; P:protein transport; P:intracellular protein transport; P:transport
Bcin01g06440.1	NA	NA	NA	Vesicle/virulence and Translate/growth Net	3e-07	7	NA	NA	NA	putative enolase protein	F:magnesium ion binding; F:phosphopyruvate hydratase activity; F:translation initiation factor activity; C:cytoplasm; P:glycolytic process; P:translational initiation; C:phosphopyruvate hydratase complex; C:eukaryotic translation initiation factor 3 complex
Bcin01g07340.1	NA	NA	NA	Siderophores Net	0	1	NA	NA	NA	hypothetical protein BC1G_10415	P:transmembrane transport; C:membrane; F:metal ion transmembrane transporter activity; P:metal ion transport
Bcin01g08050.1	NA	NA	NA	Vesicle/virulence and Translate/growth Net	6.4e-07	42	NA	NA	NA	argininosuccinate synthase [Botrytis cinerea T4]	F:ATP binding; P:arginine biosynthetic process; F:argininosuccinate synthase activity
Bcin01g08780.1	NA	NA	NA	Vesicle/virulence and Translate/growth Net	1.97e-05	31	NA	NA	NA	phospho-2-dehydro-3-deoxyheptonate aldolase [Botrytis cinerea T4]	P:aromatic amino acid family biosynthetic process; F:catalytic activity; F:3-deoxy-7-phosphoheptulonate synthase activity; P:chorismate biosynthetic process; P:cellular amino acid biosynthetic process; P:biosynthetic process; F:transferase activity
Bcin01g09560.1	NA	NA	NA	Vesicle/virulence and Translate/growth Net	7.5e-07	9	NA	NA	NA	PCI domain [Botrytis cinerea T4]	F:translation initiation factor activity; P:formation of translation preinitiation complex; C:cytoplasm; C:eukaryotic 43S preinitiation complex; C:eukaryotic 48S preinitiation complex; P:translational initiation; P:regulation of translational initiation; C:eukaryotic translation initiation factor 3 complex; P:translation
Bcin01g09570.1	NA	NA	NA	Vesicle/virulence and Translate/growth Net	0	1	Vesicle/virulence Net	0	1	hypothetical protein BofuT4_P014580.1	F:nucleotide binding; F:RNA binding
Bcin01g10310.1	NA	NA	NA	Vesicle/virulence and Translate/growth Net	4.41e-05	4	NA	NA	NA		P:glycogen biosynthetic process; F:catalytic activity; P:glycogen catabolic process; F:amylo-alpha-1,6-glucosidase activity; F:4-alpha-glucanotransferase activity
Bcin01g10340.1	NA	NA	NA	Vesicle/virulence and Translate/growth Net	0.00029316	6	NA	NA	NA	cytochrome c1 haem [Botrytis cinerea ]	F:electron carrier activity; C:membrane; C:integral component of membrane; F:heme binding
Bcin01g11060.1	NA	NA	NA	Vesicle/virulence and Translate/growth Net	0	1	NA	NA	NA	hypothetical protein BofuT4_P026740.1 [Botrytis cinerea T4]	no GO terms
Bcin02g01790.1	NA	NA	NA	Vesicle/virulence and Translate/growth Net	0	1	NA	NA	NA	tubulin alpha chain [Botrytis cinerea T4]	F:nucleotide binding; F:GTP binding; C:cytoskeleton; C:cytoplasm; F:GTPase activity; F:structural constituent of cytoskeleton; C:microtubule; P:microtubule-based process
Bcin02g02520.1	NA	NA	NA	Vesicle/virulence and Translate/growth Net	0.0211822	39	NA	NA	NA	ubiquinol-cytochrome-c reductase complex core mitochondrial precursor [Botrytis cinerea ]	F:catalytic activity; F:metal ion binding
Bcin02g03310.1	NA	NA	NA	Siderophores Net	0.4	3	NA	NA	NA	Nicotianamine synthase; zinc-regulated transporter 1	C:integral component of membrane; F:zinc ion transmembrane transporter activity; P:zinc II ion transmembrane transport
Bcin02g04170.1	NA	NA	NA	Vesicle/virulence and Translate/growth Net	2.94e-05	12	Translation/growth Net	0	1	ATP synthase subunit mitochondrial precursor [Botrytis cinerea ]	P:small molecule metabolic process; F:transmembrane transporter activity; C:mitochondrion; C:protein complex; P:cellular nitrogen compound metabolic process; P:biosynthetic process
Bcin02g04250.1	NA	NA	NA	Vesicle/virulence and Translate/growth Net	0	9	NA	NA	NA	cytochrome c oxidase subunit 5A [Botrytis cinerea T4]	F:cytochrome-c oxidase activity; P:hydrogen ion transmembrane transport; C:mitochondrial inner membrane
Bcin02g06270.1	NA	NA	NA	Vesicle/virulence and Translate/growth Net	0	3	NA	NA	NA	phosphoglycerate mutase	C:cytoplasm; F:metal ion binding; F:catalytic activity; P:metabolic process; F:phosphoglycerate mutase activity; F:manganese ion binding; P:glucose catabolic process
Bcin02g06400.1	NA	NA	NA	Vesicle/virulence and Translate/growth Net	3.7e-05	8	NA	NA	NA	dihydrolipoyl mitochondrial precursor [Botrytis cinerea ]	F:oxidoreductase activity, acting on a sulfur group of donors, NAD(P) as acceptor; C:cell; F:oxidoreductase activity; F:flavin adenine dinucleotide binding; P:cell redox homeostasis; P:oxidation-reduction process; F:dihydrolipoyl dehydrogenase activity
Bcin02g06500.1	NA	NA	NA	Vesicle/virulence and Translate/growth Net	3.5e-05	16	NA	NA	NA	EIF3K_BOTFB ame: Full=Eukaryotic translation initiation factor 3 subunit K Short=eIF3k ame: Full=eIF-3 p25	F:translation initiation factor activity; P:formation of translation preinitiation complex; F:RNA binding; C:cytoplasm; C:eukaryotic 43S preinitiation complex; F:ribosome binding; C:eukaryotic 48S preinitiation complex; P:regulation of translational initiation; P:translational initiation; C:eukaryotic translation initiation factor 3 complex; P:translation
Bcin02g06640.1	NA	NA	NA	Vesicle/virulence and Translate/growth Net	0	1	NA	NA	NA	threonyl-tRNA synthetase [Botrytis cinerea T4]	F:nucleotide binding; F:ligase activity, forming aminoacyl-tRNA and related compounds; P:tRNA aminoacylation for protein translation; F:ATP binding; F:aminoacyl-tRNA ligase activity; C:cytoplasm; F:threonine-tRNA ligase activity; P:tRNA aminoacylation; P:threonyl-tRNA aminoacylation
Bcin02g06650.1	NA	NA	NA	Vesicle/virulence and Translate/growth Net	0.00169339	14	Translation/growth Net	0	1	hypothetical protein SS1G_10974 [Sclerotinia sclerotiorum 1980]	C:box H/ACA snoRNP complex; C:nucleus; P:pseudouridine synthesis; P:ribosome biogenesis; C:nucleolus
Bcin02g06820.1	NA	NA	NA	Vesicle/virulence and Translate/growth Net	0	1	NA	NA	NA	dihydrolipoyllysine-residue succinyltransferase component of 2-oxoglutarate dehydrogenase complex [Botrytis cinerea T4]	F:dihydrolipoyllysine-residue succinyltransferase activity; F:transferase activity, transferring acyl groups; C:oxoglutarate dehydrogenase complex; P:metabolic process; P:tricarboxylic acid cycle; F:transferase activity
Bcin02g07150.1	NA	NA	NA	Vesicle/virulence and Translate/growth Net	0	2	NA	NA	NA	t-complex 1 [Botrytis cinerea T4]	F:nucleotide binding; F:ATP binding; C:cytoplasm; F:unfolded protein binding; P:protein folding
Bcin02g07410.1	NA	NA	NA	Vesicle/virulence and Translate/growth Net	0	2	NA	NA	NA	hypothetical protein BC1G_13504	F:binding
Bcin02g08540.1	NA	NA	NA	Vesicle/virulence and Translate/growth Net	0.0014881	10	Translation/growth Net	0	1	pre-rRNA processing nucleolar Sik1 [Botrytis cinerea T4]	no GO terms
Bcin02g08690.1	NA	NA	NA	26S Proteasome regulation Net	0	1	NA	NA	NA	26S protease regulatory subunit 6b [Botrytis cinerea T4]	F:nucleotide binding; F:ATP binding; C:cytoplasm; P:protein catabolic process; P:proteolysis; F:peptidase activity; F:hydrolase activity
Bcin02g08790.1	NA	NA	NA	BOT/IPP Net	0	3	BOT/IPP Net	0.133333	3	Antibiotic biosynthesis monooxygenase domain; [Botrytis cinerea ]	F:oxidoreductase activity
Bcin03g02520.1	NA	NA	NA	ATP Net	0	1	NA	NA	NA	Bcado1; Carbohydrate kinase PfkB; adenosine kinase [Botrytis cinerea ]	P:AMP biosynthetic process; F:adenosine kinase activity; P:phosphorylation; P:purine ribonucleoside salvage; F:phosphotransferase activity, alcohol group as acceptor; F:kinase activity
Bcin03g04010.1	NA	NA	NA	Cyclic peptide Net	0	1	NA	NA	NA	Bccel5A; cellulase; endo-beta-1,4-glucanase precursor [Botrytis cinerea]	F:molecular_function; Glycoside hydrolase, family 5
Bcin03g04810.1	NA	NA	NA	Vesicle/virulence and Translate/growth Net	3.58e-05	17	Translation/growth Net	0	1	polyadenylate-binding [Botrytis cinerea T4]	F:nucleotide binding; F:nucleic acid binding; F:RNA binding; C:cytoplasm
Bcin03g06600.1	NA	NA	NA	Vesicle/virulence and Translate/growth Net	0	6	NA	NA	NA	heat shock 70 [Botrytis cinerea T4]	F:nucleotide binding; F:ATP binding
Bcin03g06810.1	NA	NA	NA	Vesicle/virulence and Translate/growth Net	0	2	NA	NA	NA		F:protein binding; F:RNA binding; F:binding
Bcin03g06810.2	NA	NA	NA	Vesicle/virulence and Translate/growth Net	0	1	NA	NA	NA	eukaryotic translation initiation factor subunit	F:translation factor activity, RNA binding
Bcin04g00780.1	NA	NA	NA	Peptidase Net	0.186364	6	Peptidase Net	0	5	hypothetical protein BC1G_07010 [Botrytis cinerea B05.10]	C:integral component of membrane; Marvel domain
Bcin04g01690.1	NA	NA	NA	Vesicle/virulence and Translate/growth Net	0	2	NA	NA	NA	hypothetical protein BofuT4_P115970.1	F:nucleotide binding; F:nucleic acid binding; F:ATP binding; F:helicase activity; F:hydrolase activity
Bcin04g01890.1	NA	NA	NA	BOT/IPP Net	0.0268056	3	BOT/IPP Net	0	2	Bcmvd1; diphosphomevalonate decarboxylase [Botrytis cinerea T4]	P:sulfur compound metabolic process; P:cofactor metabolic process; P:lipid metabolic process; F:lyase activity; F:ion binding; C:cytosol; P:biosynthetic process
Bcin04g02950.1	NA	NA	NA	Peptidase Net	0	1	Peptidase Net	0.00061843	5	hypothetical protein BcDW1_2395	no GO terms; signal peptide
Bcin04g03030.1	NA	NA	NA	Vesicle/virulence and Translate/growth Net	0.00011843	43	NA	NA	NA	eukaryotic translation initiation factor 3 [Botrytis cinerea ]	F:translation initiation factor activity; P:formation of translation preinitiation complex; C:cytoplasm; C:eukaryotic 43S preinitiation complex; C:eukaryotic 48S preinitiation complex; P:translational initiation; P:regulation of translational initiation; C:eukaryotic translation initiation factor 3 complex; P:translation
Bcin04g05020.1	NA	NA	NA	Peptidase Net	0	4	Peptidase Net	0.192971	13	beta-ig-h3 fasciclin [Botrytis cinerea 1]	no GO terms; FAS1 domain
Bcin04g05260.1	NA	NA	NA	Vesicle/virulence and Translate/growth Net	0	15	NA	NA	NA		F:ubiquitin-protein transferase activity; F:protein binding
Bcin04g06570.1	NA	NA	NA	ATP Net	0	1	NA	NA	NA	Bcmet6; Cobalamin-independent methionine synthase; hypothetical protein BC1G_15093	F:nucleotide binding; P:tRNA aminoacylation for protein translation; F:ATP binding; P:leucyl-tRNA aminoacylation; F:aminoacyl-tRNA ligase activity; F:leucine-tRNA ligase activity; C:cytoplasm; F:aminoacyl-tRNA editing activity
Bcin05g01360.1	NA	NA	NA	Vesicle/virulence and Translate/growth Net	0	1	NA	NA	NA	oxoglutarate dehydrogenase	F:thiamine pyrophosphate binding; F:oxidoreductase activity, acting on the aldehyde or oxo group of donors, disulfide as acceptor; F:oxoglutarate dehydrogenase (succinyl-transferring) activity; P:metabolic process; P:tricarboxylic acid cycle; P:oxidation-reduction process
Bcin05g04170.1	NA	NA	NA	Vesicle/virulence and Translate/growth Net	0	2	NA	NA	NA	ribosome assembly Noc2	F:binding
Bcin05g04420.1	NA	NA	NA	Vesicle/virulence and Translate/growth Net	0.0255055	22	Translation/growth Net	0.00123967	2	mitochondrial processing peptidase beta mitochondrial precursor [Botrytis cinerea ]	F:catalytic activity; F:metal ion binding; P:proteolysis; F:metalloendopeptidase activity
Bcin05g04870.1	NA	NA	NA	Peptidase II Net	0	2	NA	NA	NA	fumarate reductase [Botrytis cinerea T4]	F:oxidoreductase activity; P:oxidation-reduction process; F:succinate dehydrogenase activity
Bcin05g05240.1	NA	NA	NA	Vesicle/virulence and Translate/growth Net	0	1	NA	NA	NA	calcium uniporter mitochondrial	C:membrane; C:integral component of membrane
Bcin05g05420.1	NA	NA	NA	Peptidase Net	0	1	Peptidase Net	0	2	hypothetical protein BcDW1_5528	no GO terms; signal peptide
Bcin05g05790.1	NA	NA	NA	Vesicle/virulence and Translate/growth Net	0.002295	11	NA	NA	NA	nucleolar [Botrytis cinerea ]	C:box C/D snoRNP complex; C:small-subunit processome; C:nucleus; P:endonucleolytic cleavage to generate mature 5'-end of SSU-rRNA from (SSU-rRNA, 5.8S rRNA, LSU-rRNA); C:intracellular ribonucleoprotein complex; P:endonucleolytic cleavage in 5'-ETS of tricistronic rRNA transcript (SSU-rRNA, 5.8S rRNA, LSU-rRNA); P:ribosome biogenesis; P:endonucleolytic cleavage in ITS1 to separate SSU-rRNA from 5.…
Bcin05g06760.1	NA	NA	NA	Exocytosis regulation Net	0	1	Exocytosis regulation Net	0	1	predicted protein	C:spliceosomal complex; P:spliceosomal snRNP assembly
Bcin05g06830.1	NA	NA	NA	Plant cell wall degradation Net	0	1	NA	NA	NA	Cellulose; chitin binding [Botrytis cinerea 1]	Cellulose
Bcin05g08280.1	NA	NA	NA	Vesicle/virulence and Translate/growth Net	0.00121137	6	NA	NA	NA		P:purine nucleotide biosynthetic process; F:catalytic activity; F:oxidoreductase activity; F:IMP dehydrogenase activity; P:oxidation-reduction process
Bcin06g02540.1	NA	NA	NA	Vesicle/virulence and Translate/growth Net	0	1	NA	NA	NA	rpel repeat [Botrytis cinerea 1]	no GO terms
Bcin06g03290.1	NA	NA	NA	Vesicle/virulence and Translate/growth Net	0	1	NA	NA	NA	periodic tryptophan [Botrytis cinerea T4]	F:protein binding
Bcin06g05640.1	NA	NA	NA	Vesicle/virulence and Translate/growth Net	0	1	NA	NA	NA	DNA-directed RNA polymerases I and III subunit RPAC1 [Botrytis cinerea T4]	F:DNA-directed 5'-3' RNA polymerase activity; P:transcription, DNA-templated; F:protein dimerization activity
Bcin06g07280.1	NA	NA	NA	Vesicle/virulence and Translate/growth Net	0	2	NA	NA	NA	nuclear segregation	no GO terms
Bcin07g00300.1	NA	NA	NA	ROS/NO stress Net	0	1	NA	NA	NA	hemerythrin hhe cation binding domain-containing [Botrytis cinerea 1]	no GO terms
Bcin07g01210.1	NA	NA	NA	Vesicle/virulence and Translate/growth Net	1.93e-05	3	NA	NA	NA	hypothetical protein BC1G_09778	F:GTP binding; F:GTPase activity
Bcin07g01290.1	NA	NA	NA	Vesicle/virulence and Translate/growth Net	0	3	NA	NA	NA	heat shock Hsp88 [Botrytis cinerea T4]	F:nucleotide binding; F:ATP binding
Bcin07g01290.2	NA	NA	NA	Vesicle/virulence and Translate/growth Net	0	2	NA	NA	NA	Heat shock Hsp88	C:nucleus; F:ion binding; C:cytosol
Bcin07g01580.1	NA	NA	NA	Vesicle/virulence and Translate/growth Net	0	1	NA	NA	NA	nucleolar GTP-binding [Botrytis cinerea T4]	F:GTP binding; P:ribosome biogenesis; C:nucleolus
Bcin07g01590.1	NA	NA	NA	Vesicle/virulence and Translate/growth Net	0	1	NA	NA	NA	orotate phosphoribosyltransferase [Botrytis cinerea T4]	P:nucleoside metabolic process; P:pyrimidine nucleotide biosynthetic process; F:orotate phosphoribosyltransferase activity
Bcin07g01890.1	NA	NA	NA	Vesicle/virulence and Translate/growth Net	0	8	NA	NA	NA	pyruvate dehydrogenase e1 component alpha subunit [Botrytis cinerea T4]	P:acetyl-CoA biosynthetic process from pyruvate; C:intracellular membrane-bounded organelle; F:pyruvate dehydrogenase (acetyl-transferring) activity; P:oxidation-reduction process
Bcin07g04280.1	NA	NA	NA	Vesicle/virulence and Translate/growth Net	3.83e-05	6	NA	NA	NA	isocitrate dehydrogenase subunit 2 [Botrytis cinerea T4]	F:magnesium ion binding; F:isocitrate dehydrogenase (NAD+) activity; F:NAD binding; C:mitochondrion; P:tricarboxylic acid cycle
Bcin07g04500.1	NA	NA	NA	Vesicle/virulence and Translate/growth Net	0	2	NA	NA	NA	fkbp-type peptidyl-prolyl	F:peptidyl-prolyl cis-trans isomerase activity; F:FK506 binding; C:nucleolus; P:histone peptidyl-prolyl isomerization; P:protein folding
Bcin07g06360.1	NA	NA	NA	ATP Net	0	1	NA	NA	NA	Bcmet13; methylenetetrahydrofolate reductase	P:oxidation-reduction process; F:methylenetetrahydrofolate reductase (NAD(P)H) activity; P:methionine metabolic process
Bcin08g00630.1	NA	NA	NA	Vesicle/virulence and Translate/growth Net	0	1	NA	NA	NA	glutamate-rich WD repeat containing 1 [Botrytis cinerea T4]	C:nucleus
Bcin08g01120.1	NA	NA	NA	Siderophores Net	0	2	NA	NA	NA	Bclap3; Peptidase C1B, bleomycin hydrolase; hypothetical protein BC1G_00227 [Botrytis cinerea B05.10]	Peptidase C1B, bleomycin hydrolase
Bcin08g03210.1	NA	NA	NA	Vesicle/virulence and Translate/growth Net	0	1	NA	NA	NA	mitochondrial 54S ribosomal 35 [Botrytis cinerea ]	C:ribosome
Bcin08g03480.1	NA	NA	NA	Exocytosis regulation Net	0	1	Exocytosis regulation Net	0	1	WD40/YVTN repeat-like-containing domain superfamily, hypothetical protein BofuT4_P132330.1	F:protein binding
Bcin08g04150.1	NA	NA	NA	Vesicle/virulence and Translate/growth Net	0	2	NA	NA	NA	hypothetical protein BofuT4_P084660.1	F:nucleic acid binding; P:RNA processing
Bcin08g04540.1	NA	NA	NA	Vesicle/virulence and Translate/growth Net	4.02e-06	8	NA	NA	NA	pyruvate dehydrogenase E1 component beta subunit [Botrytis cinerea ]	P:small molecule metabolic process; P:sulfur compound metabolic process; F:oxidoreductase activity; P:cofactor metabolic process; P:biosynthetic process
Bcin08g04730.1	NA	NA	NA	Sugar Net	0	1	NA	NA	NA	fructose-1,6-bisphosphatase [Botrytis cinerea ]	P:carbohydrate metabolic process; F:fructose 1,6-bisphosphate 1-phosphatase activity; P:dephosphorylation
Bcin08g05160.1	NA	NA	NA	Vesicle/virulence and Translate/growth Net	0	2	NA	NA	NA		P:intracellular protein transport; F:binding; F:Ran GTPase binding
Bcin08g05540.1	NA	NA	NA	Peptidase Net	0	3	Peptidase Net	0	1	hypothetical protein BC1G_08931	no GO terms; Egh16-like virulence factor
Bcin08g06040.1	NA	NA	NA	Vesicle/virulence and Translate/growth Net	0	2	NA	NA	NA	hypothetical protein BC1G_11026	P:transmembrane transport; F:calcium ion binding
Bcin09g01110.1	NA	NA	NA	Plant cell wall degradation Net	1	9	NA	NA	NA	Glycoside hydrolase, family 7; hypothetical protein BC1G_14702	P:carbohydrate metabolic process; F:hydrolase activity, hydrolyzing O-glycosyl compounds; C:extracellular region; F:cellulose binding
Bcin09g02670.1	NA	NA	NA	Vesicle/virulence and Translate/growth Net	0.00069797	16	NA	NA	NA	ATP synthase subunit O [Botrytis cinerea T4]	F:ATPase activity; P:small molecule metabolic process; F:transmembrane transporter activity; P:cellular nitrogen compound metabolic process; P:biosynthetic process; C:cellular_component
Bcin09g03570.1	NA	NA	NA	Vesicle/virulence and Translate/growth Net	5.92e-06	5	NA	NA	NA	ATP synthase d subunit [Botrytis cinerea ]	C:mitochondrial proton-transporting ATP synthase complex, coupling factor F(o); F:hydrogen ion transmembrane transporter activity; P:ATP synthesis coupled proton transport
Bcin09g05520.1	NA	NA	NA	Sugar Net	0.05	3	Sugar Net	0.0833333	3	D-glycerate 3-kinase	P:phosphorylation; F:kinase activity
Bcin09g05530.1	NA	NA	NA	Sugar Net	0.75	5	Sugar Net	0.583333	4	oxidation-reduction process; tartrate dehydrogenase [Botrytis cinerea T4]	F:magnesium ion binding; F:oxidoreductase activity, acting on the CH-OH group of donors, NAD or NADP as acceptor; F:NAD binding; P:oxidation-reduction process
Bcin09g05560.1	NA	NA	NA	Sugar Net	0	2	Sugar Net	0	2	glyceraldehyde-3-phosphate dehydrogenase [Botrytis cinerea T4]	F:NADP binding; F:NAD binding; P:glycolytic process; P:oxidation-reduction process; P:glucose metabolic process; F:glyceraldehyde-3-phosphate dehydrogenase (NAD+) (phosphorylating) activity
Bcin09g05570.1	NA	NA	NA	Sugar Net	0	2	Sugar Net	0	2	MFS sugar transporter [Botrytis cinerea T4]	F:substrate-specific transmembrane transporter activity; P:transmembrane transport; C:integral component of membrane; P:carbohydrate transport
Bcin09g05590.1	NA	NA	NA	Vesicle/virulence and Translate/growth Net	0.00445656	102	Translation/growth Net	0	1	60S ribosomal L10 [Botrytis cinerea ]	F:structural constituent of ribosome; C:cytosolic large ribosomal subunit; P:ribosomal large subunit assembly; P:translation
Bcin09g06120.1	NA	NA	NA	Siderophores Net	0.5	4	NA	NA	NA	Bczrt1; Zinc/iron permease, fungal/plant; zinc-regulated transporter 1	P:ion transport; P:transmembrane transport; C:membrane; C:integral component of membrane; F:zinc ion transmembrane transporter activity; F:metal ion transmembrane transporter activity; P:metal ion transport; P:zinc II ion transmembrane transport; P:transport
Bcin10g01180.1	NA	NA	NA	Vesicle/virulence and Translate/growth Net	0.00801467	3	NA	NA	NA	atp-binding cassette sub-family f member 2	F:ATPase activity; F:ATP binding
Bcin10g01380.1	NA	NA	NA	Vesicle/virulence and Translate/growth Net	0	9	NA	NA	NA	hypothetical protein BC1G_05092	F:nucleic acid binding; P:transport; C:intracellular
Bcin10g01530.1	NA	NA	NA	Vesicle/virulence and Translate/growth Net	1.66e-05	9	NA	NA	NA	succinyl- ligase subunit alpha [Botrytis cinerea T4]	F:cofactor binding; P:metabolic process; F:ligase activity
Bcin10g03240.1	NA	NA	NA	Vesicle/virulence and Translate/growth Net	0.00022852	12	NA	NA	NA	KH domain RNA-binding [Botrytis cinerea T4]	F:RNA binding
Bcin10g03490.1	NA	NA	NA	Siderophores Net	0.1	3	NA	NA	NA	L-lysine 6-monooxygenase/L-ornithine 5-monooxygenase; fad binding domain	F:oxidoreductase activity; P:oxidation-reduction process
Bcin10g04550.1	NA	NA	NA	Vesicle/virulence and Translate/growth Net	1.64e-05	25	Translation/growth Net	0	1	rRNA methyltransferase NOP1 [Botrytis cinerea ]	F:structural constituent of ribosome; C:cytosolic large ribosomal subunit; F:rRNA binding; P:ribosomal large subunit assembly; P:translation
Bcin10g05090.1	NA	NA	NA	Vesicle/virulence and Translate/growth Net	0	1	NA	NA	NA	mitochondrial ATP synthase delta chain [Botrytis cinerea T4]	C:proton-transporting ATP synthase complex, catalytic core F(1); F:proton-transporting ATPase activity, rotational mechanism; P:ATP synthesis coupled proton transport; F:proton-transporting ATP synthase activity, rotational mechanism
Bcin10g05150.1	NA	NA	NA	Vesicle/virulence and Translate/growth Net	0	3	NA	NA	NA	eukaryotic translation initiation factor 6 [Botrytis cinerea T4]	F:translation initiation factor activity; P:ribosomal subunit export from nucleus; P:maturation of 5.8S rRNA; P:maturation of LSU-rRNA; F:ribosome binding; C:cytosol; F:ribosomal large subunit binding; P:mature ribosome assembly; C:nucleolus; P:translational initiation; P:assembly of large subunit precursor of preribosome; C:preribosome, large subunit precursor
Bcin10g05400.1	NA	NA	NA	26S Proteasome regulation Net	0	1	Vesicle/virulence Net	0	1	phosphatase PP2A regulatory subunit A [Botrytis cinerea T4]	F:binding
Bcin10g05890.1	NA	NA	NA	Vesicle/virulence and Translate/growth Net	0	1	NA	NA	NA	ribosome biogenesis rlp24	P:ribosome biogenesis
Bcin11g00130.1	NA	NA	NA	Vesicle/virulence and Translate/growth Net	0	1	NA	NA	NA	ccaat-box-binding transcription factor [Botrytis cinerea 1]	F:binding
Bcin11g01040.1	NA	NA	NA	ROS/NO stress Net	0	1	NA	NA	NA	hypothetical protein BofuT4_P035490.1 [Botrytis cinerea T4]	no GO terms
Bcin11g02110.1	NA	NA	NA	Vesicle/virulence and Translate/growth Net	0.00024838	36	NA	NA	NA	arginine n-methyltransferase [Botrytis cinerea T4]	F:methyltransferase activity; P:protein methylation
Bcin11g02250.1	NA	NA	NA	Vesicle/virulence and Translate/growth Net	0	1	NA	NA	NA	nuclear GTP-binding NUG1 [Botrytis cinerea T4]	F:GTP binding
Bcin11g02610.1	NA	NA	NA	Vesicle/virulence and Translate/growth Net	0.00023782	67	Translation/growth Net	0	1	GTP-binding [Botrytis cinerea T4]	F:GTP binding; F:ATPase activity; F:ATP binding; C:cytoplasm; F:ribosome binding; F:ribosomal large subunit binding
Bcin11g03520.1	NA	NA	NA	ATP Net	0.833333	3	NA	NA	NA	S-adenosylmethionine synthetase [Botrytis cinerea ]	F:ATP binding; F:metal ion binding; P:S-adenosylmethionine biosynthetic process; F:methionine adenosyltransferase activity; P:one-carbon metabolic process
Bcin11g03840.1	NA	NA	NA	Copper transport Net	0	2	NA	NA	NA	hypothetical protein BC1G_03422	F:oxidoreductase activity; P:oxidation-reduction process
Bcin11g04150.1	NA	NA	NA	Vesicle/virulence and Translate/growth Net	0	1	NA	NA	NA	ERB1_BOTFB ame: Full=Ribosome biogenesis erb1 ame: Full=Eukaryotic ribosome biogenesis 1	P:ribosome biogenesis; C:protein complex; P:cellular nitrogen compound metabolic process; C:nucleolus; F:molecular_function; C:nucleoplasm
Bcin11g05160.1	NA	NA	NA	ATP Net	0.5	2	NA	NA	NA	Bcsah1; adenosylhomocysteinase [Botrytis cinerea T4]	F:adenosylhomocysteinase activity; P:one-carbon metabolic process; F:hydrolase activity
Bcin11g06020.1	NA	NA	NA	26S Proteasome regulation Net	0	1	NA	NA	NA	26S protease regulatory subunit 6A [Botrytis cinerea ]	F:ATP binding; C:cytoplasm; P:protein catabolic process; P:proteolysis; F:peptidase activity
Bcin12g00190.1	NA	NA	NA	Vesicle/virulence and Translate/growth Net	0	3	NA	NA	NA	GMP synthase [Botrytis cinerea T4]	F:ATP binding; F:GMP synthase (glutamine-hydrolyzing) activity; F:pyrophosphatase activity; P:GMP biosynthetic process
Bcin12g01150.1	NA	NA	NA	Peptidase Net	0	2	Peptidase Net	0	1	hypothetical protein BC1G_03456 [Botrytis cinerea B05.10]	C:integral component of membrane; signal peptide
Bcin12g01350.1	NA	NA	NA	26S Proteasome regulation Net	0	1	NA	NA	NA	ubiquitin-activating enzyme E1 1	F:ATP binding; P:cellular protein modification process; F:small protein activating enzyme activity
Bcin12g01780.1	NA	NA	NA	BOT/IPP Net	0.0268056	2	BOT/IPP Net	0	5	Bcidi1; isopentenyl-diphosphate delta-isomerase [Botrytis cinerea 1]	F:isopentenyl-diphosphate delta-isomerase activity; P:isoprenoid biosynthetic process; F:hydrolase activity
Bcin12g02240.1	NA	NA	NA	Vesicle/virulence and Translate/growth Net	0	3	Vesicle/virulence Net	0.0363636	3	hypothetical protein BC1G_03104	C:membrane
Bcin12g02910.1	NA	NA	NA	Cyclic peptide Net	0	1	NA	NA	NA	cellobiose dehydrogenase	F:oxidoreductase activity; F:ion binding
Bcin12g03260.1	NA	NA	NA	Peptidase II Net	0	1	NA	NA	NA	atp synthase f0 [Botrytis cinerea 1]	C:membrane; C:integral component of membrane
Bcin12g03270.1	NA	NA	NA	Peptidase II Net	0	1	Peptidase II Net	0	1	similar to aminopeptidase	F:metal ion binding; P:proteolysis; F:aminopeptidase activity; F:peptidase activity; F:hydrolase activity
Bcin12g04650.1	NA	NA	NA	Vesicle/virulence and Translate/growth Net	0	3	NA	NA	NA	ubiquinol-cytochrome c reductase iron-sulphur subunit [Botrytis cinerea ]	F:ubiquinol-cytochrome-c reductase activity; F:metal ion binding; P:hydrogen ion transmembrane transport; P:oxidation-reduction process; F:2 iron, 2 sulfur cluster binding; C:mitochondrial inner membrane; C:respiratory chain
Bcin12g04660.1	NA	NA	NA	Vesicle/virulence and Translate/growth Net	0	3	NA	NA	NA	t-complex 1 [Botrytis cinerea T4]	F:nucleotide binding; F:ATP binding; C:cytoplasm; F:unfolded protein binding; P:protein folding
Bcin12g04860.1	NA	NA	NA	Vesicle/virulence and Translate/growth Net	0	2	NA	NA	NA		F:ATP binding; F:aspartate carbamoyltransferase activity; P:'de novo' pyrimidine nucleobase biosynthetic process; P:nitrogen compound metabolic process; F:metal ion binding; P:glutamine metabolic process; P:cellular amino acid metabolic process; F:carbamoyl-phosphate synthase (glutamine-hydrolyzing) activity; F:amino acid binding; F:carboxyl- or carbamoyltransferase activity
Bcin12g05730.1	NA	NA	NA	Vesicle/virulence and Translate/growth Net	2.05e-05	6	Translation/growth Net	0.0158402	2	dihydrolipoamide acetyltransferase component E2 of pyruvate dehydrogenase complex [Botrytis cinerea ]	C:pyruvate dehydrogenase complex; C:mitochondrial matrix; P:pyruvate metabolic process; F:dihydrolipoyllysine-residue acetyltransferase activity
Bcin12g06630.1	NA	NA	NA	Plant cell wall degradation Net	0	1	NA	NA	NA	glycoside hydrolase family 45 [Botrytis cinerea T4]	P:carbohydrate metabolic process; F:cellulase activity
Bcin13g00300.1	NA	NA	NA	Plant cell wall degradation Net	0	1	NA	NA	NA	hypothetical protein BcDW1_977	no GO terms
Bcin13g02510.1	NA	NA	NA	Vesicle/virulence and Translate/growth Net	1.55e-05	5	NA	NA	NA	hsp90-binding co-chaperone [Botrytis cinerea 1]	no GO terms
Bcin13g04540.1	NA	NA	NA	Vesicle/virulence and Translate/growth Net	0	1	NA	NA	NA	isoleucyl-tRNA synthetase ,cytoplasmic [Botrytis cinerea T4]	P:isoleucyl-tRNA aminoacylation; F:ATP binding; F:isoleucine-tRNA ligase activity; C:cytoplasm; P:regulation of translational fidelity; F:aminoacyl-tRNA editing activity
Bcin14g00430.1	NA	NA	NA	Vesicle/virulence and Translate/growth Net	0	8	NA	NA	NA	homoaconitase [Botrytis cinerea T4]	F:metal ion binding; F:homoaconitate hydratase activity; C:mitochondrion; F:4 iron, 4 sulfur cluster binding; P:lysine biosynthetic process via aminoadipic acid
Bcin14g00850.1	NA	NA	NA	Plant cell wall degradation Net	0	1	NA	NA	NA	endo-polygalacturonase precursor [Botrytis cinerea ]	P:carbohydrate metabolic process; P:cell wall organization or biogenesis; C:extracellular region; F:hydrolase activity, acting on glycosyl bonds
Bcin14g00960.1	NA	NA	NA	Vesicle/virulence and Translate/growth Net	0	2	NA	NA	NA	ATP-dependent RNA helicase has1 [Botrytis cinerea T4]	F:ATP binding; F:RNA binding; F:helicase activity
Bcin14g01740.1	NA	NA	NA	Vesicle/virulence and Translate/growth Net	0	3	NA	NA	NA	hypothetical protein sscle_16g108990	F:catalytic activity; P:polyamine metabolic process
Bcin14g02580.1	NA	NA	NA	Vesicle/virulence and Translate/growth Net	0	1	NA	NA	NA	zinc finger gis2 [Botrytis cinerea 1]	F:zinc ion binding; F:oxidoreductase activity; P:oxidation-reduction process
Bcin14g04050.1	NA	NA	NA	Vesicle/virulence and Translate/growth Net	0	3	NA	NA	NA	recombination hotspot-binding (Translin) [Botrytis cinerea T4]	F:sequence-specific DNA binding
Bcin14g04620.1	NA	NA	NA	Vesicle/virulence and Translate/growth Net	0	1	NA	NA	NA	cytochrome c oxidase polypeptide vib	F:cytochrome-c oxidase activity; C:mitochondrion; P:hydrogen ion transmembrane transport
Bcin14g04850.1	NA	NA	NA	Vesicle/virulence and Translate/growth Net	0.0197585	66	NA	NA	NA	ribosome biogenesis Nhp2 [Botrytis cinerea ]	F:RNA binding; C:intracellular ribonucleoprotein complex; P:ribosome biogenesis; C:nucleolus
Bcin15g00320.1	NA	NA	NA	ROS/NO stress Net	0	1	NA	NA	NA	hypothetical protein BC1G_12400	no GO terms
Bcin15g01270.1	NA	NA	NA	Vesicle/virulence and Translate/growth Net	4.87e-06	5	NA	NA	NA	hypothetical protein BofuT4_P006400.1	F:nucleotide binding; F:nucleic acid binding
Bcin15g01380.1	NA	NA	NA	Vesicle/virulence and Translate/growth Net	0.00034081	20	Translation/growth Net	0	1	ATP-specific succinyl- synthetase beta subunit [Botrytis cinerea ]	F:ATP binding; F:metal ion binding; P:metabolic process; F:ligase activity
Bcin15g01620.1	NA	NA	NA	Vesicle/virulence and Translate/growth Net	0	1	NA	NA	NA	methylenetetrahydrofolate dehydrogenase [Botrytis cinerea T4]	P:folic acid-containing compound biosynthetic process; P:oxidation-reduction process; F:methylenetetrahydrofolate dehydrogenase (NADP+) activity
Bcin15g02090.1	NA	NA	NA	Vesicle/virulence and Translate/growth Net	0	1	Vesicle/virulence Net	0	1	glycoside hydrolase family 13 [Botrytis cinerea T4]	P:glycogen biosynthetic process; F:1,4-alpha-glucan branching enzyme activity; F:cation binding; F:hydrolase activity, hydrolyzing O-glycosyl compounds
Bcin15g02110.1	NA	NA	NA	Vesicle/virulence and Translate/growth Net	0	1	NA	NA	NA	cytochrome c oxidase subunit V [Botrytis cinerea ]	F:cytochrome-c oxidase activity; C:integral component of membrane; P:hydrogen ion transmembrane transport
Bcin15g03120.1	NA	NA	NA	BOT/IPP Net	0.00833333	3	BOT/IPP Net	0.170317	7	Bcerg20; farnesyl diphosphate synthase [Botrytis cinerea]	P:isoprenoid biosynthetic process; F:transferase activity
Bcin15g03870.1	NA	NA	NA	Plant cell wall degradation Net	0	1	NA	NA	NA	Cellulose-binding domain, fungal; [Botrytis cinerea ]	P:carbohydrate metabolic process; C:extracellular region; F:hydrolase activity, acting on glycosyl bonds; signal peptide
Bcin15g04200.1	NA	NA	NA	Vesicle/virulence and Translate/growth Net	0	1	NA	NA	NA	alpha- glucosyltransferase alg-10 [Botrytis cinerea 1]	C:integral component of membrane; F:transferase activity
Bcin15g04630.1	NA	NA	NA	Vesicle/virulence and Translate/growth Net	0.0171061	12	NA	NA	NA	hypothetical protein BC1G_12782	F:nucleic acid binding
Bcin15g04630.2	NA	NA	NA	Vesicle/virulence and Translate/growth Net	0.0363979	18	NA	NA	NA	hypothetical protein BC1G_12782	F:nucleic acid binding
Bcin16g00060.1	NA	NA	NA	Vesicle/virulence and Translate/growth Net	0	1	Vesicle/virulence Net	0	1	[Botrytis cinerea ]	no GO terms
Bcin16g00630.1	NA	NA	NA	Sugar Net	0	1	Sugar Net	0	1	phosphoenolpyruvate carboxykinase	F:phosphoenolpyruvate carboxykinase (ATP) activity; F:ATP binding; P:gluconeogenesis; P:phosphorylation; F:kinase activity
Bcin16g00710.1	NA	NA	NA	Vesicle/virulence and Translate/growth Net	0	1	NA	NA	NA	eukaryotic peptide chain release factor gtp-binding subunit [Botrytis cinerea 1]	F:GTP binding; P:translational termination; F:translation release factor activity; F:GTPase activity; P:nuclear-transcribed mRNA catabolic process, deadenylation-dependent decay
Bcin16g01180.1	NA	NA	NA	Siderophores Net	0	1	NA	NA	NA	nicotianamine synthase 3	P:nicotianamine biosynthetic process; F:nicotianamine synthase activity
Bcin16g01350.1	NA	NA	NA	Vesicle/virulence and Translate/growth Net	0	3	NA	NA	NA	eukaryotic translation initiation factor 5 [Botrytis cinerea T4]	F:translation initiation factor activity; P:translational initiation
Bcin16g01640.1	NA	NA	NA	Vesicle/virulence and Translate/growth Net	0	1	NA	NA	NA	t-complex 1 [Botrytis cinerea T4]	F:ATP binding; C:cytoplasm; F:unfolded protein binding; P:protein folding
Bcin01g02600.1	NA	NA	NA	NA	NA	NA	Vesicle/virulence Net	0	1	mitochondrial atpase	P:negative regulation of ATPase activity; F:ATPase inhibitor activity; C:mitochondrion
Bcin01g02600.2	NA	NA	NA	NA	NA	NA	Vesicle/virulence Net	0	1
Bcin01g05510.1	NA	NA	NA	NA	NA	NA	Copper transport Net	0.166667	2	CTR2 long splice variant	P:cellular copper ion homeostasis; F:copper uptake transmembrane transporter activity; C:membrane; C:fungal-type vacuole membrane; P:intracellular copper ion transport; C:integral component of membrane; F:copper ion transmembrane transporter activity; P:copper ion transmembrane transport; P:copper ion import
Bcin01g05510.2	NA	NA	NA	NA	NA	NA	Copper transport Net	0	1
Bcin01g05760.1	NA	NA	NA	NA	NA	NA	Peptidase Net	0	1	Transmembrane helices	no GO terms
Bcin01g05770.1	NA	NA	NA	NA	NA	NA	Polyketide Net	0	1	hypothetical protein BC1G_00442; Alpha/Beta hydrolase	P:metabolic process; F:hydrolase activity
Bcin01g07760.1	NA	NA	NA	NA	NA	NA	Polyketide Net	0	1	NADP-dependent oxidoreductase; aldo-keto reductase [Botrytis cinerea T4]	no GO terms
Bcin01g08500.1	NA	NA	NA	NA	NA	NA	Vesicle/virulence Net	0	1	integral membrane [Botrytis cinerea T4]	C:cellular_component
Bcin02g05630.1	NA	NA	NA	NA	NA	NA	Peptidase Net	0	1	[Botrytis cinerea ]	no GO terms; LysM domain
Bcin02g06510.1	NA	NA	NA	NA	NA	NA	Peptidase Net	0	4	Cytochrome c1, transmembrane anchor, C-terminal; hypothetical protein BofuT4_P153690.1	C:membrane; C:integral component of membrane; transmembrane helices
Bcin02g07310.1	NA	NA	NA	NA	NA	NA	Peptidase Net	0	1	BcAP6; hypothetical protein BC1G_13520	F:aspartic-type endopeptidase activity; P:proteolysis; signal peptide
Bcin02g08710.1	NA	NA	NA	NA	NA	NA	Peptidase Net	0	3	transcription factor Cys6	C:nucleus; F:zinc ion binding; P:regulation of transcription, DNA-templated; F:RNA polymerase II transcription factor activity, sequence-specific DNA binding; P:regulation of transcription from RNA polymerase II promoter
Bcin03g03440.1	NA	NA	NA	NA	NA	NA	Vesicle/virulence Net	0	1	HAD superfamily hydrolase [Botrytis cinerea T4]	P:metabolic process; F:hydrolase activity
Bcin03g09080.1	NA	NA	NA	NA	NA	NA	Peptidase Net	0.00061843	5	predicted protein	no GO terms
Bcin04g06310.1	NA	NA	NA	NA	NA	NA	Copper transport Net	0	3	Bcatx1; Heavy metal-associated domain; hypothetical protein BC1G_03899 [Botrytis cinerea B05.10]	F:ion binding; P:transport
Bcin05g04810.1	NA	NA	NA	NA	NA	NA	Polyketide Net	0	2	CinA-like; [Botrytis cinerea ]	no GO terms
Bcin07g03730.1	NA	NA	NA	NA	NA	NA	Peptidase Net	0	3	predicted protein	no GO terms; transmembrane helices
Bcin08g03460.1	NA	NA	NA	NA	NA	NA	Polyketide Net	0	3	short chain dehydrogenase reductase family oxidoreductase [Botrytis cinerea T4]	NAD(P)-binding domain superfamily
Bcin09g06130.1	NA	NA	NA	NA	NA	NA	Peptidase Net	0	2	Bcpls1; tetraspanin [Botrytis cinerea]	C:integral component of membrane
Bcin10g05330.1	NA	NA	NA	NA	NA	NA	Peptidase Net	0	3	hypothetical protein BcDW1_6414	no GO terms
Bcin11g05080.1	NA	NA	NA	NA	NA	NA	Polyketide Net	0	1	pyridoxal reductase [Botrytis cinerea 1]	NADP-dependent oxidoreductase domain superfamily
Bcin12g00300.1	NA	NA	NA	NA	NA	NA	Polyketide Net	0	1	glycoside hydrolase family 35 [Botrytis cinerea T4]	P:carbohydrate metabolic process; F:hydrolase activity, hydrolyzing O-glycosyl compounds
Bcin12g01140.1	NA	NA	NA	NA	NA	NA	Peptidase Net	0	2		no GO terms
Bcin12g01340.1	NA	NA	NA	NA	NA	NA	Polyketide Net	0	1	glutathione s-transferase	F:transferase activity
Bcin13g03110.1	NA	NA	NA	NA	NA	NA	BOT/IPP Net	0	1	Bcpio2; -like family domain-containing [Botrytis cinerea T4]	no GO terms; NmrA-like domain
Bcin13g03590.1	NA	NA	NA	NA	NA	NA	Polyketide Net	0	1	short chain dehydrogenase [Botrytis cinerea ]	NAD(P)-binding domain superfamily
Bcin14g01580.1	NA	NA	NA	NA	NA	NA	Polyketide Net	0.00842105	3	Polyketide synthase; alcohol dehydrogenase [Botrytis cinerea T4]	F:zinc ion binding; F:oxidoreductase activity; P:oxidation-reduction process
Bcin16g03620.1	NA	NA	NA	NA	NA	NA	Polyketide Net	0.0352632	4	Epoxide hydrolase; hypothetical protein BC1G_10921	F:catalytic activity; F:cis-stilbene-oxide hydrolase activity
Bcin16g04420.1	NA	NA	NA	NA	NA	NA	Peptidase Net	0	4	hypothetical protein BofuT4_P151260.1	C:membrane; C:integral component of membrane; transmembrane helices
