# Supplementary material for: Plant–necrotroph co-transcriptome networks illuminate a metabolic battlefield
Source: eLife. 2019 May 13;8:e44279. doi: 10.7554/eLife.44279 (PMC6557632; doi:10.7554/eLife.44279)
Supplement: Figure 8—source data 1. — Tables of Arabidopsis and B. cinerea genes identified by co-transcriptome gene co-expression networks (GCNs) during 96 isolates infection on Arabidopsis wild-type Col-0, jasmonate insensitive mutant coi1-1, and salicylic acid insensitive mutant npr1-1. [file elife-44279-fig8-data1.xlsx]

## Sheet: F8_SD1_AtBcNetworkGeneList
Figure 8-source data 1. Gene list of cross-kingdom Arabidopsis-B. cinerea gene co-expression networks. Tables of Arabidopsis and B. cinerea genes identified by co-transcriptome gene co-expression networks (GCNs) during 96 isolates infection on Arabidopsis wild-type Col-0, jasmonate insensitive mutant coi1-1, and salicylic acid insensitive mutant npr1-1.
	Col-0		coi1-1		npr1-1
Gene ID	Degree	Betweenness Centrality	Degree	Betweenness Centrality	Degree	Betweenness Centrality	Description	GO
Bcin11g05080.1	541	0.556339	2	4.8e-05	706	0.133866	pyridoxal reductase [Botrytis cinerea 1]	no GO terms
Bcin12g05690.1	423	0.347515	1	0	990	0.239261	glutathione s-transferase	F:transferase activity
Bcin03g04480.1	252	0.120718	7	0.0154168	230	0.00640018	oxidoreductase [Botrytis cinerea T4]	no GO terms
Bcin02g01660.1	193	0.0936979	2	1	102	0.0027467	amino acid transporter [Botrytis cinerea T4]	C:cellular_component
Bcin02g05870.1	109	0.0690325	268	0.535973	696	0.1598	zinc-binding alcohol dehydrogenase [Botrytis cinerea T4]	F:oxidoreductase activity; F:ion binding
Bcin13g00710.1	88	0.0149483	NA	NA	25	3.61e-05	abc transporter	F:ATPase activity; F:ATP binding; F:ATPase activity, coupled to transmembrane movement of substances; C:membrane; C:integral component of membrane; P:transport
Bcin16g03620.1	84	0.0192897	45	0.0276346	701	0.0876181	hypothetical protein BC1G_10921	F:catalytic activity; F:cis-stilbene-oxide hydrolase activity
Bcin11g02050.1	65	0.0281228	NA	NA	50	0.0001526	short-chain dehydrogenase reductase [Botrytis cinerea T4]	F:oxidoreductase activity; P:oxidation-reduction process
Bcin12g06370.1	63	0.0419467	1	0	186	0.0198202	BcBOT4, BCL4p	F:oxidoreductase activity; F:ion binding; C:cellular_component
Bcin08g04910.1	42	0.0064065	NA	NA	23	2.66e-05	oxidoreductase -	no GO terms
Bcin14g01580.1	31	0.00558463	NA	NA	47	0.00015668	alcohol dehydrogenase [Botrytis cinerea T4]	F:zinc ion binding; F:oxidoreductase activity; P:oxidation-reduction process
Bcin05g06280.1	30	0.00528833	1	0	157	0.00249721	nadp-dependent leukotriene b4 12-hydroxydehydrogenase	F:zinc ion binding; F:oxidoreductase activity; P:oxidation-reduction process
Bcin14g00850.1	27	0.0108671	109	0.136723	596	0.104008	endo-polygalacturonase precursor [Botrytis cinerea ]	P:carbohydrate metabolic process; P:cell wall organization or biogenesis; C:extracellular region; F:hydrolase activity, acting on glycosyl bonds
Bcin15g00150.1	27	0.0006487	NA	NA	NA	NA	---NA---	no IPS match
AT3G46930	25	0.0121648	1	0	15	0.00056589	AT3G46930	Protein kinase superfamily protein
AT3G53810	25	0.0150471	2	0.00021673	11	0.00036753	AT3G53810	Concanavalin A-like lectin protein kinase family protein
AT1G29690	22	0.00714096	2	0.00161383	26	0.00151143	CAD1	MAC/Perforin domain-containing protein
Bcin10g00740.1	22	0.00058763	NA	NA	NA	NA	AF061253_1glutathione S-transferase [Botrytis cinerea]	F:glutathione transferase activity; F:transferase activity
AT3G25610	20	0.00753337	4	0.00328937	19	0.00113641	AT3G25610	ATPase E1-E2 type family protein / haloacid dehalogenase-like hydrolase family protein
AT1G62300	19	0.00638791	2	0.00046147	22	0.00087798	WRKY6	WRKY family transcription factor
Bcin15g00160.1	19	0.00034661	NA	NA	203	0.0105707	predicted protein, partial	no GO terms
Bcin02g01260.1	18	0.00043263	NA	NA	115	0.0013171	hypothetical protein BC1G_02640	F:oxidoreductase activity, acting on paired donors, with incorporation or reduction of molecular oxygen; F:iron ion binding; P:oxidation-reduction process; F:heme binding
AT1G61360	16	0.00201745	5	0.00395162	10	0.00012063	AT1G61360	S-locus lectin protein kinase family protein
AT5G57010	16	0.00551052	1	0	12	0.00034092	AT5G57010	calmodulin-binding family protein
Bcin02g08790.1	16	0.00032568	NA	NA	191	0.00587839	[Botrytis cinerea ]	F:oxidoreductase activity
AT3G05360	15	0.00428676	3	0.00068721	16	0.00055589	RLP30	receptor like protein 30
Bcin07g02220.1	15	0.00115049	NA	NA	NA	NA	abc multidrug	F:nucleotide binding; F:ATPase activity; F:ATP binding; F:ATPase activity, coupled to transmembrane movement of substances; P:transmembrane transport; C:membrane; C:integral component of membrane; P:transport
AT3G18830	14	0.00770577	2	0.00046147	27	0.00159518	PMT5	polyol/monosaccharide transporter 5
AT3G52400	14	0.00381652	1	0	14	0.00050419	SYP122	syntaxin of plants 122
AT4G29780	14	0.00468312	1	0	22	0.00087861	AT4G29780	nuclease
AT5G03610	14	0.00514142	5	0.0141701	21	0.00080968	AT5G03610	GDSL-like Lipase/Acylhydrolase superfamily protein
Bcin01g07760.1	14	0.00017954	15	0.0178851	1005	0.228615	aldo-keto reductase [Botrytis cinerea T4]	no GO terms
AT1G14870	13	0.00273868	3	0.0007596	14	0.00024194	PCR2	PLANT CADMIUM RESISTANCE 2
AT1G22410	13	0.00404563	7	0.00631868	19	0.0008926	AT1G22410	Class-II DAHP synthetase family protein
AT1G69930	13	0.0036481	2	0.00019212	16	0.00055596	GSTU11	glutathione S-transferase TAU 11
Bcin01g09650.1	13	0.00271734	1	0	NA	NA	glucose-6-phosphate 1-dehydrogenase	P:carbohydrate metabolic process; F:NADP binding; P:pentose-phosphate shunt; F:oxidoreductase activity; P:oxidation-reduction process; P:glucose metabolic process; F:glucose-6-phosphate dehydrogenase activity
Bcin05g07670.1	13	0.00047397	NA	NA	1	0	alcohol dehydrogenase	F:zinc ion binding; F:oxidoreductase activity; P:oxidation-reduction process
Bcin08g03460.1	13	0.00014481	NA	NA	8	7.09e-06	short chain dehydrogenase reductase family oxidoreductase [Botrytis cinerea T4]	no GO terms
AT5G11210	12	0.00468692	3	0.0005276	5	9.82e-05	GLR2.5	glutamate receptor 2.5
Bcin01g01910.2	12	0.0005844	NA	NA	NA	NA	wd domain-containing	F:protein binding
Bcin09g01110.1	12	0.00469413	224	0.424032	316	0.0537669	hypothetical protein BC1G_14702	P:carbohydrate metabolic process; F:hydrolase activity, hydrolyzing O-glycosyl compounds; C:extracellular region; F:cellulose binding
AT2G47000	11	0.00296691	1	0	20	0.0005087	ABCB4	ATP binding cassette subfamily B4
AT3G02230	11	0.00749317	1	0	24	0.0013868	RGP1	reversibly glycosylated polypeptide 1
AT5G42010	11	0.00513388	1	0	15	0.00060853	AT5G42010	Transducin/WD40 repeat-like superfamily protein
AT5G48400	11	0.00206487	1	0	25	0.00109548	ATGLR1.2	Glutamate receptor family protein
Bcin01g04580.1	11	0.00037858	43	0.0256148	35	0.00014415	hypothetical protein BofuT4_P163510.1	no GO terms
Bcin04g05410.1	11	0.00066296	NA	NA	3	6.6e-07	peptide-n4-(n-acetyl-beta-glucosaminyl)asparagine amidase a [Botrytis cinerea 1]	C:cellular_component
AT1G13520	10	0.0038383	2	0.00048213	15	0.00057265	AT1G13520	hypothetical protein (DUF1262)
AT1G61370	10	0.0028501	6	0.00661811	14	0.00099501	AT1G61370	S-locus lectin protein kinase family protein
AT2G39660	10	0.00313494	2	0.00021673	19	0.00077315	BIK1	botrytis-induced kinase1
AT4G14220	10	0.00232085	1	0	11	0.00017664	RHF1A	RING-H2 group F1A
AT4G39670	10	0.00294288	2	0.00021673	13	0.00038142	AT4G39670	Glycolipid transfer protein (GLTP) family protein
AT4G39950	10	0.00253653	1	0	15	0.0006433	CYP79B2	cytochrome P450, family 79, subfamily B, polypeptide 2
Bcin06g00024.1	10	0.00015035	123	0.161964	330	0.015745	zn-dependent hydrolases of the beta-lactamase	F:molecular_function
AT1G01480	9	0.00289301	3	0.0007596	13	0.0003893	ACS2	1-amino-cyclopropane-1-carboxylate synthase 2
AT1G14540	9	0.00280803	2	0.00014024	17	0.00041405	PER4	Peroxidase superfamily protein
AT1G25083	9	0.00303813	1	0	16	0.00041946	AT1G25083	Glutamine amidotransferase type 1 family protein
AT1G76600	9	0.00454182	3	0.00078674	13	0.00015863	AT1G76600	poly polymerase
AT3G22060	9	0.00145725	1	0	11	0.00033034	AT3G22060	Receptor-like protein kinase-related family protein
AT5G49700	9	0.00682059	1	0	22	0.00130852	AT5G49700	Putative AT-hook DNA-binding family protein
Bcin01g01260.1	9	0.00028903	NA	NA	5	8.6e-07		F:protein binding
Bcin01g10530.1	9	0.00241955	NA	NA	104	0.00122949	hypothetical protein BC1G_05244	no GO terms
AT1G09940	8	0.00203522	NA	NA	9	0.00029807	HEMA2	Glutamyl-tRNA reductase family protein
AT1G22180	8	0.00184721	1	0	15	0.00046059	AT1G22180	Sec14p-like phosphatidylinositol transfer family protein
AT3G08760	8	0.00421744	NA	NA	11	0.00071678	ATSIK	Protein kinase superfamily protein
AT3G59080	8	0.00236408	2	0.00021673	11	0.000252	AT3G59080	Eukaryotic aspartyl protease family protein
AT4G19970	8	0.00201176	1	0	4	1.98e-05	AT4G19970	nucleotide-diphospho-sugar transferase family protein
AT4G20830	8	0.00230896	7	0.00895151	21	0.00087913	AT4G20830	FAD-binding Berberine family protein
AT4G26910	8	0.00287332	1	0	22	0.00128902	AT4G26910	Dihydrolipoamide succinyltransferase
AT4G37370	8	0.00195576	7	0.00895151	21	0.00074493	CYP81D8	cytochrome P450, family 81, subfamily D, polypeptide 8
AT5G22300	8	0.00214388	4	0.00152173	16	0.00025102	NIT4	nitrilase 4
AT5G26340	8	0.00269506	1	0	25	0.00145832	MSS1	Major facilitator superfamily protein
AT5G48410	8	0.0013098	1	0	24	0.0009648	GLR1.3	glutamate receptor 1.3
AT5G58350	8	0.00358258	NA	NA	12	0.00043383	WNK4	with no lysine (K) kinase 4
Bcin06g01060.1	8	0.00012877	10	0.00058303	292	0.0243288	hypothetical protein BC1G_01082 [Botrytis cinerea B05.10]	C:cellular_component
Bcin06g05230.1	8	8.75e-05	NA	NA	13	1.42e-05	transcription factor Cys6 [Botrytis cinerea T4]	C:nucleus; F:zinc ion binding; F:RNA polymerase II transcription factor activity, sequence-specific DNA binding; P:regulation of transcription from RNA polymerase II promoter
Bcin12g06460.1	8	0.00014922	NA	NA	116	0.00190456	dienelactone hydrolase family [Botrytis cinerea T4]	F:hydrolase activity
AT1G07160	7	0.00248905	4	0.00277073	13	0.00049439	AT1G07160	Protein phosphatase 2C family protein
AT1G30700	7	0.00096541	1	0	7	0.00021406	AT1G30700	FAD-binding Berberine family protein
AT1G56140	7	0.004284	NA	NA	8	0.00031353	AT1G56140	Leucine-rich repeat transmembrane protein kinase
AT2G01180	7	0.00187604	1	0	23	0.00093685	PAP1	phosphatidic acid phosphatase 1
AT2G02930	7	0.00035186	3	0.00175865	10	0.00021776	GSTF3	glutathione S-transferase F3
AT2G38470	7	0.00115142	1	0	10	0.00052982	WRKY33	WRKY DNA-binding protein 33
AT2G45300	7	0.00112002	1	0	13	0.00031444	AT2G45300	RNA 3'-terminal phosphate cyclase/enolpyruvate transferase, alpha/beta
AT4G35110	7	0.00118833	8	0.00609639	6	5.51e-05	AT4G35110	phospholipase-like protein (PEARLI 4) family protein
AT5G04930	7	0.0014383	3	0.00297147	29	0.00140563	ALA1	aminophospholipid ATPase 1
AT5G67340	7	0.00205426	4	0.00316608	25	0.00128036	AT5G67340	ARM repeat superfamily protein
Bcin04g00200.1	7	0.00237221	NA	NA	NA	NA	delta-aminolevulinic acid dehydratase [Botrytis cinerea 1]	F:porphobilinogen synthase activity; P:porphyrin-containing compound biosynthetic process; F:catalytic activity; F:metal ion binding; F:lyase activity; P:tetrapyrrole biosynthetic process
Bcin11g01310.1	7	2.24e-05	NA	NA	NA	NA	hypothetical protein BC1G_03976	no GO terms
Bcin13g03110.1	7	6.55e-05	NA	NA	10	6.63e-06	-like family domain-containing [Botrytis cinerea T4]	no GO terms
AT1G09970	6	0.00125389	NA	NA	2	3.34e-05	LRR XI-23	Leucine-rich receptor-like protein kinase family protein
AT1G17290	6	0.00162374	NA	NA	8	0.00041132	AlaAT1	alanine aminotransferas
AT1G29290	6	0.00272018	NA	NA	5	9e-05	AT1G29290	B-cell lymphoma 6 protein
AT1G63720	6	0.00157823	NA	NA	11	0.00044591	AT1G63720	hydroxyproline-rich glycoprotein family protein
AT2G16900	6	0.00143564	2	0.00021673	18	0.00047297	AT2G16900	phospholipase-like protein (PEARLI 4) family protein
AT2G24180	6	0.00272018	NA	NA	8	0.00045954	CYP71B6	cytochrome p450 71b6
AT2G31345	6	0.00044825	1	0	9	0.0001884	AT2G31345	transmembrane protein
AT2G38250	6	0.00090724	5	0.00362206	10	0.00019739	AT2G38250	Homeodomain-like superfamily protein
AT2G45570	6	0.00130225	2	0.00013903	21	0.00083004	CYP76C2	cytochrome P450, family 76, subfamily C, polypeptide 2
AT3G04220	6	0.00124126	NA	NA	11	0.00063711	AT3G04220	Disease resistance protein (TIR-NBS-LRR class) family
AT3G09570	6	0.00359321	NA	NA	9	0.00048626	AT3G09570	Lung seven transmembrane receptor family protein
AT3G21700	6	0.00354181	NA	NA	10	0.00056673	SGP2	Ras-related small GTP-binding family protein
AT3G22600	6	0.00173575	3	0.00108459	20	0.00085569	AT3G22600	Bifunctional inhibitor/lipid-transfer protein/seed storage 2S albumin superfamily protein
AT3G44720	6	0.00140107	3	0.00078674	18	0.00046182	ADT4	arogenate dehydratase 4
AT3G47780	6	0.00096671	6	0.00187129	11	0.0004683	ABCA7	ABC2 homolog 6
AT3G54420	6	0.00087067	7	0.00511314	11	0.00047643	EP3	homolog of carrot EP3-3 chitinase
AT3G57330	6	0.00122143	NA	NA	7	0.00022988	ACA11	autoinhibited Ca2 -ATPase 11
AT4G08780	6	0.00242911	NA	NA	5	6.25e-05	AT4G08780	Peroxidase superfamily protein
AT4G15120	6	0.00105308	2	0.00021673	13	0.00034249	AT4G15120	VQ motif-containing protein
AT4G23190	6	0.00095334	2	0.00161383	7	6.24e-05	CRK11	cysteine-rich RLK (RECEPTOR-like protein kinase) 11
AT4G39580	6	0.00246661	NA	NA	6	7.32e-05	AT4G39580	Galactose oxidase/kelch repeat superfamily protein
AT5G46910	6	0.0015307	NA	NA	2	4.01e-06	AT5G46910	Transcription factor jumonji (jmj) family protein / zinc finger (C5HC2 type) family protein
AT5G47730	6	0.00136626	1	0	11	0.00010879	AT5G47730	Sec14p-like phosphatidylinositol transfer family protein
Bcin02g03270.1	6	2.97e-05	NA	NA	NA	NA		F:pyridoxal phosphate binding; F:catalytic activity; P:biosynthetic process
Bcin08g05200.1	6	4.77e-05	2	1.36e-05	291	0.0305369	cytochrome p450 alkane hydroxylase	F:oxidoreductase activity; F:ion binding; C:cellular_component
Bcin09g00460.1	6	2.72e-05	NA	NA	66	0.00025763	ABC transporter substrate binding	no GO terms
Bcin12g06380.1	6	0.00018121	NA	NA	67	0.00035976	BcBOT1, CND5p	F:oxidoreductase activity; F:ion binding
Bcin12g06430.1	6	0.00029198	NA	NA	20	0.00144192	BcBOT7, short-chain dehydrogenase reductase SDR [Botrytis cinerea T4]	C:cellular_component
Bcin13g03100.1	6	0.00027359	NA	NA	NA	NA	3-beta hydroxysteroid dehydrogenase isomerase family [Botrytis cinerea T4]	F:coenzyme binding; F:catalytic activity; F:isomerase activity
AT1G01340	5	0.00031036	1	0	12	0.00050279	CNGC10	cyclic nucleotide gated channel 10
AT1G08940	5	0.00105243	NA	NA	9	0.00053016	AT1G08940	Phosphoglycerate mutase family protein
AT1G10700	5	0.00314721	NA	NA	7	0.00026068	PRS3	phosphoribosyl pyrophosphate (PRPP) synthase 3
AT1G15520	5	0.00110315	2	0.00046147	8	6.67e-05	ABCG40	pleiotropic drug resistance 12
AT1G17750	5	0.00054925	NA	NA	5	0.00016841	PEPR2	PEP1 receptor 2
AT1G18900	5	0.00216175	NA	NA	11	0.00048649	AT1G18900	Pentatricopeptide repeat (PPR) superfamily protein
AT1G24807	5	0.00214167	NA	NA	8	0.00046442	AT1G24807	Glutamine amidotransferase type 1 family protein
AT1G25220	5	0.0008916	1	0	19	0.00092504	ASB1	anthranilate synthase beta subunit 1
AT1G26730	5	0.00109835	NA	NA	4	5.73e-05	AT1G26730	EXS (ERD1/XPR1/SYG1) family protein
AT1G30270	5	0.00291599	1	0	6	2.09e-05	CIPK23	CBL-interacting protein kinase 23
AT1G32960	5	0.00111441	1	0	10	0.00021347	SBT3.3	Subtilase family protein
AT1G53430	5	0.00102615	NA	NA	4	2.98e-05	AT1G53430	Leucine-rich repeat transmembrane protein kinase
AT1G54090	5	0.00300823	1	0	8	0.00018902	EXO70D2	exocyst subunit exo70 family protein D2
AT1G54890	5	0.00130837	NA	NA	2	1.32e-05	AT1G54890	Late embryogenesis abundant (LEA) protein-like protein
AT1G57630	5	0.00197223	7	0.00777937	18	0.00093192	AT1G57630	Toll-Interleukin-Resistance (TIR) domain family protein
AT1G66700	5	0.00123281	1	0	8	6.98e-05	PXMT1	S-adenosyl-L-methionine-dependent methyltransferases superfamily protein
AT1G67980	5	0.0017164	NA	NA	5	2.73e-05	CCOAMT	caffeoyl-CoA 3-O-methyltransferase
AT1G72520	5	0.00027325	1	0	8	0.00010571	LOX4	PLAT/LH2 domain-containing lipoxygenase family protein
AT1G73010	5	0.00134119	NA	NA	6	6.75e-05	PS2	inorganic pyrophosphatase 1
AT1G74360	5	0.00138787	2	0.00046147	18	0.00048772	AT1G74360	Leucine-rich repeat protein kinase family protein
AT2G02860	5	0.00218275	NA	NA	5	0.00016841	SUT2	sucrose transporter 2
AT2G04400	5	0.0016067	1	0	18	0.00075696	AT2G04400	Aldolase-type TIM barrel family protein
AT2G23320	5	0.00080205	1	0	8	0.00035706	WRKY15	WRKY DNA-binding protein 15
AT2G30720	5	0.00216175	NA	NA	10	0.00035413	AT2G30720	Thioesterase/thiol ester dehydrase-isomerase superfamily protein
AT2G36380	5	0.00124128	NA	NA	6	9.65e-05	ABCG34	pleiotropic drug resistance 6
AT2G36770	5	0.00105223	NA	NA	7	0.0003123	AT2G36770	UDP-Glycosyltransferase superfamily protein
AT2G43150	5	0.00245353	NA	NA	5	6.25e-05	AT2G43150	Proline-rich extensin-like family protein
AT2G44790	5	0.00130837	NA	NA	8	0.00030676	UCC2	uclacyanin 2
AT2G45220	5	0.0017164	NA	NA	5	0.00013096	AT2G45220	Plant invertase/pectin methylesterase inhibitor superfamily
AT2G47510	5	0.00059612	1	0	25	0.00124706	FUM1	fumarase 1
AT3G06300	5	0.00214167	NA	NA	2	2.71e-05	P4H2	P4H isoform 2
AT3G13050	5	0.00098777	NA	NA	4	0.0001298	NiaP	Major facilitator superfamily protein
AT3G13650	5	0.00114483	NA	NA	1	0	AT3G13650	Disease resistance-responsive (dirigent-like protein) family protein
AT3G19260	5	0.0016067	1	0	23	0.00073416	LOH2	LAG1 homologue 2
AT3G21070	5	0.00134119	NA	NA	1	0	NADK1	NAD kinase 1
AT3G26910	5	0.00127067	NA	NA	10	0.00056641	AT3G26910	hydroxyproline-rich glycoprotein family protein
AT3G28340	5	0.00194661	NA	NA	8	0.00034626	GATL10	galacturonosyltransferase-like 10
AT3G48450	5	0.0017164	NA	NA	7	0.00028243	AT3G48450	RPM1-interacting protein 4 (RIN4) family protein
AT3G53600	5	0.0017164	NA	NA	4	0.00014218	AT3G53600	C2H2-type zinc finger family protein
AT3G55410	5	0.00211245	NA	NA	11	0.00063711	AT3G55410	2-oxoglutarate dehydrogenase, E1 component
AT3G59695	5	0.00130837	NA	NA	11	0.00046831	AT3G59695	Natural antisense transcript overlaps with AT3G59690
AT3G63380	5	0.00050991	1	0	24	0.00105672	AT3G63380	ATPase E1-E2 type family protein / haloacid dehalogenase-like hydrolase family protein
AT4G08770	5	0.0017164	NA	NA	3	1.63e-05	Prx37	Peroxidase superfamily protein
AT4G14370	5	0.00126724	3	0.00121517	18	0.00058205	AT4G14370	Disease resistance protein (TIR-NBS-LRR class) family
AT4G23250	5	0.00130837	NA	NA	7	0.0002767	EMB1290	cysteine-rich receptor-like protein kinase 17
AT4G26120	5	0.00040378	2	0.00017238	4	1.15e-05	AT4G26120	Ankyrin repeat family protein / BTB/POZ domain-containing protein
AT4G26970	5	6.08e-05	4	0.00155423	27	0.00145478	ACO2	aconitase 2
AT4G30350	5	0.00245413	2	9.22e-05	13	0.00210438	AT4G30350	Double Clp-N motif-containing P-loop nucleoside triphosphate hydrolases superfamily protein
AT4G31970	5	0.00105243	NA	NA	10	0.00057273	CYP82C2	cytochrome P450, family 82, subfamily C, polypeptide 2
AT4G35830	5	0.00245555	NA	NA	13	0.00068785	ACO1	aconitase 1
AT4G37710	5	0.00214167	NA	NA	8	0.00044732	AT4G37710	VQ motif-containing protein
AT5G14700	5	0.00134119	NA	NA	2	2.17e-05	AT5G14700	NAD(P)-binding Rossmann-fold superfamily protein
AT5G46080	5	0.00121807	1	0	15	0.00049789	AT5G46080	Protein kinase superfamily protein
AT5G59700	5	0.00214167	NA	NA	5	6.25e-05	AT5G59700	Protein kinase superfamily protein
AT5G63680	5	0.00123281	2	0.00046147	22	0.00078527	AT5G63680	Pyruvate kinase family protein
AT5G63790	5	0.00043642	13	0.0238983	19	0.0006218	NAC102	NAC domain containing protein 102
Bcin12g03180.1	5	6.22e-05	NA	NA	NA	NA		F:FMN binding; F:oxidoreductase activity; F:NADPH-hemoprotein reductase activity; P:oxidation-reduction process
Bcin12g06390.1	5	0.00014079	NA	NA	135	0.00178308	BcBOT2, BOT2_BOTFU, Calcineurin-dependent 15, Sesquiterpene cyclase BOT2	P:lipid metabolic process; F:ion binding; F:lyase activity; P:biosynthetic process
Bcin14g01070.1	5	2.8e-05	NA	NA	5	1.12e-06	alcohol dehydrogenase groes domain [Botrytis cinerea T4]	F:zinc ion binding; F:oxidoreductase activity; P:oxidation-reduction process
AT1G02220	4	0.00024862	2	0.00013903	12	0.00040868	NAC003	NAC domain containing protein 3
AT1G11050	4	0.00083462	NA	NA	4	2.98e-05	AT1G11050	Protein kinase superfamily protein
AT1G16090	4	0.00104026	1	0	11	0.0002147	WAKL7	wall associated kinase-like 7
AT1G18300	4	0.00086712	6	0.00632969	13	0.00024096	NUDT4	nudix hydrolase homolog 4
AT1G21310	4	0.00027402	3	0.00285699	1	0	EXT3	extensin 3
AT1G23850	4	0.00087793	NA	NA	4	5.73e-05	AT1G23850	transmembrane protein
AT1G25155	4	0.00145918	NA	NA	11	0.00073829	AT1G25155	Glutamine amidotransferase type 1 family protein
AT1G30450	4	0.00108688	NA	NA	6	0.00020878	CCC1	cation-chloride co-transporter 1
AT1G31930	4	0.00082365	NA	NA	6	0.00012395	XLG3	extra-large GTP-binding protein 3
AT1G48850	4	0.00073485	9	0.00458557	32	0.00165629	EMB1144	chorismate synthase, putative / 5-enolpyruvylshikimate-3-phosphate phospholyase
AT1G56060	4	0.00027498	2	0.00221934	4	5.65e-06	AT1G56060	cysteine-rich/transmembrane domain protein B
AT1G61820	4	0.00084562	NA	NA	5	0.00010326	BGLU46	beta glucosidase 46
AT1G66370	4	0.00082365	NA	NA	4	3.38e-05	MYB113	myb domain protein 113
AT1G68450	4	0.00145918	NA	NA	8	0.00027395	PDE337	VQ motif-containing protein
AT1G70170	4	0.00108688	NA	NA	9	0.00051251	MMP	matrix metalloproteinase
AT1G71520	4	0.00068646	NA	NA	14	0.00091554	AT1G71520	Integrase-type DNA-binding superfamily protein
AT1G72540	4	0.00108688	NA	NA	5	6.25e-05	AT1G72540	Protein kinase superfamily protein
AT1G73080	4	0.00055727	NA	NA	7	0.00034278	PEPR1	PEP1 receptor 1
AT1G74750	4	0.00038255	NA	NA	1	0	AT1G74750	Pentatricopeptide repeat (PPR) superfamily protein
AT1G75170	4	0.00175718	3	0.0005276	19	0.00090766	AT1G75170	Sec14p-like phosphatidylinositol transfer family protein
AT1G80300	4	0.00160433	NA	NA	12	0.00082764	NTT1	nucleotide transporter 1
AT2G11520	4	0.00060098	1	0	3	2.67e-05	CRCK3	calmodulin-binding receptor-like cytoplasmic kinase 3
AT2G15780	4	0.00082365	NA	NA	4	6.22e-05	AT2G15780	Cupredoxin superfamily protein
AT2G16500	4	0.00061657	NA	NA	10	0.00045578	ADC1	arginine decarboxylase 1
AT2G20010	4	0.00092934	NA	NA	4	0.00012571	AT2G20010	Gls protein (DUF810)
AT2G20900	4	0.00145918	NA	NA	11	0.00050513	DGK5	diacylglycerol kinase 5
AT2G20950	4	0.00108688	NA	NA	12	0.00071646	AT2G20950	phospholipase-like protein (PEARLI 4) family protein
AT2G21500	4	0.00034533	NA	NA	3	3.33e-05	AT2G21500	RING/U-box superfamily protein
AT2G22010	4	0.00108688	NA	NA	NA	NA	RKP	related to KPC1
AT2G32250	4	0.00027965	NA	NA	5	0.00016378	FRS2	FAR1-related sequence 2
AT2G35980	4	0.00088069	3	0.00113572	11	0.00023773	YLS9	Late embryogenesis abundant (LEA) hydroxyproline-rich glycoprotein family
AT2G42360	4	0.000375	3	0.00184622	4	9.3e-07	AT2G42360	RING/U-box superfamily protein
AT2G44070	4	0.00092934	NA	NA	8	0.00024011	AT2G44070	NagB/RpiA/CoA transferase-like superfamily protein
AT3G02520	4	0.00038408	1	0	20	0.00116498	GRF7	general regulatory factor 7
AT3G02840	4	0.00019016	2	0.00021673	8	0.0001859	AT3G02840	ARM repeat superfamily protein
AT3G23220	4	0.00068646	NA	NA	3	4.18e-05	ESE1	Integrase-type DNA-binding superfamily protein
AT3G23510	4	0.00073963	4	0.00054477	4	9.08e-06	AT3G23510	Cyclopropane-fatty-acyl-phospholipid synthase
AT3G26200	4	0.00145918	NA	NA	3	1.63e-05	CYP71B22	cytochrome P450, family 71, subfamily B, polypeptide 22
AT3G26670	4	0.00065763	1	0	22	0.00089981	AT3G26670	magnesium transporter, putative (DUF803)
AT3G53160	4	0.00082365	NA	NA	6	9.57e-05	UGT73C7	UDP-glucosyl transferase 73C7
AT3G53180	4	0.00108688	NA	NA	4	0.0001043	NodGS	nodulin/glutamine synthase-like protein
AT3G55960	4	0.00055727	NA	NA	8	0.00030928	AT3G55960	Haloacid dehalogenase-like hydrolase (HAD) superfamily protein
AT3G56500	4	0.00108688	NA	NA	10	0.00056391	AT3G56500	serine-rich protein-like protein
AT3G59690	4	0.00082365	NA	NA	11	0.00043393	IQD13	IQ-domain 13
AT3G62150	4	0.00061657	NA	NA	7	0.00010245	ABCB21	P-glycoprotein 21
AT3G62720	4	0.00108443	NA	NA	2	8.82e-06	XT1	xylosyltransferase 1
AT4G05020	4	0.00037415	2	0.00089617	26	0.00172002	NDB2	NAD(P)H dehydrogenase B2
AT4G11280	4	0.00055558	4	0.00152173	14	0.00016646	ACS6	1-aminocyclopropane-1-carboxylic acid (acc) synthase 6
AT4G11850	4	0.00082365	NA	NA	2	8.82e-06	PLDGAMMA1	phospholipase D gamma 1
AT4G16820	4	0.00037914	NA	NA	2	1.29e-05	PLA-I{beta]2	alpha/beta-Hydrolases superfamily protein
AT4G17500	4	0.00059016	1	0	9	0.00019667	ERF-1	ethylene responsive element binding factor 1
AT4G17615	4	0.00086411	NA	NA	4	5.08e-05	CBL1	calcineurin B-like protein 1
AT4G18950	4	0.00145918	NA	NA	9	0.00047262	AT4G18950	Integrin-linked protein kinase family
AT4G23215	4	0.00023064	4	0.00232106	3	8.6e-06	AT4G23215	pseudogene of cysteine-rich RECEPTOR-like kinase
AT4G25230	4	0.00182286	1	0	26	0.00135836	RIN2	RPM1 interacting protein 2
AT4G28550	4	0.00145918	NA	NA	8	0.00045794	AT4G28550	Ypt/Rab-GAP domain of gyp1p superfamily protein
AT4G31940	4	0.00084562	NA	NA	2	2.18e-05	CYP82C4	cytochrome P450, family 82, subfamily C, polypeptide 4
AT4G33520	4	0.00108688	NA	NA	5	0.00010326	PAA1	P-type ATP-ase 1
AT4G33920	4	0.00072726	5	0.00399244	25	0.00163677	AT4G33920	Protein phosphatase 2C family protein
AT4G35080	4	0.00145918	NA	NA	7	0.00023623	AT4G35080	high-affinity nickel-transport family protein
AT4G35380	4	0.00025933	NA	NA	9	0.00048466	AT4G35380	SEC7-like guanine nucleotide exchange family protein
AT4G37530	4	0.0020822	2	0.00089617	28	0.00166574	AT4G37530	Peroxidase superfamily protein
AT4G39230	4	0.00019313	2	0.00017238	3	1e-05	AT4G39230	NmrA-like negative transcriptional regulator family protein
AT5G03630	4	0.00085969	NA	NA	13	0.00071236	ATMDAR2	Pyridine nucleotide-disulfide oxidoreductase family protein
AT5G15640	4	0.00108688	NA	NA	12	0.00086578	AT5G15640	Mitochondrial substrate carrier family protein
AT5G17860	4	0.00192018	1	0	14	0.00048722	CAX7	calcium exchanger 7
AT5G18150	4	0.00192111	NA	NA	3	1.63e-05	AT5G18150	Methyltransferase-related protein
AT5G18480	4	0.00052771	1	0	23	0.00111971	PGSIP6	plant glycogenin-like starch initiation protein 6
AT5G20230	4	0.00029733	1	0	4	3.56e-05	BCB	blue-copper-binding protein
AT5G20960	4	0.00056856	3	0.00113572	9	0.00013802	AO1	aldehyde oxidase 1
AT5G22780	4	0.00115001	NA	NA	8	0.00032342	AT5G22780	Adaptor protein complex AP-2, alpha subunit
AT5G27380	4	0.00073069	NA	NA	9	0.00024642	GSH2	glutathione synthetase 2
AT5G44240	4	0.00108688	NA	NA	13	0.00068785	ALA2	aminophospholipid ATPase 2
AT5G44480	4	0.00145918	NA	NA	8	0.00030676	DUR	NAD(P)-binding Rossmann-fold superfamily protein
AT5G46780	4	0.00082365	NA	NA	11	0.00054656	AT5G46780	VQ motif-containing protein
AT5G48657	4	0.00022497	7	0.00648711	18	0.00076251	AT5G48657	defense protein-like protein
AT5G50760	4	0.00131045	NA	NA	8	0.0002324	AT5G50760	SAUR-like auxin-responsive protein family
AT5G54810	4	0.00145918	NA	NA	7	0.00010903	TSB1	tryptophan synthase beta-subunit 1
AT5G57510	4	0.00346151	NA	NA	2	2.17e-05	AT5G57510	cotton fiber protein
AT5G61010	4	0.00111117	3	0.00104232	31	0.00174463	EXO70E2	exocyst subunit exo70 family protein E2
AT5G61560	4	0.0007843	3	0.00214403	10	0.00069269	AT5G61560	U-box domain-containing protein kinase family protein
AT5G62150	4	0.00145918	NA	NA	3	5.03e-05	AT5G62150	peptidoglycan-binding LysM domain-containing protein
Bcin01g01910.1	4	1.57e-05	NA	NA	NA	NA	dj-1 family	no GO terms
Bcin02g04510.1	4	8.57e-06	NA	NA	NA	NA	nitroreductase family [Botrytis cinerea T4]	F:oxidoreductase activity, acting on NAD(P)H, nitrogenous group as acceptor; F:oxidoreductase activity; P:cellular response to oxidative stress
AT1G02170	3	0.00063239	NA	NA	15	0.00095938	MC1	metacaspase 1
AT1G03230	3	0.00063239	NA	NA	14	0.00077784	AT1G03230	Eukaryotic aspartyl protease family protein
AT1G04280	3	0.00048939	2	0.00014196	22	0.0007348	AT1G04280	P-loop containing nucleoside triphosphate hydrolases superfamily protein
AT1G07620	3	0.00064892	NA	NA	12	0.00075213	ATOBGM	GTP-binding protein Obg/CgtA
AT1G15430	3	0.00058677	1	0	11	0.00016595	AT1G15430	hypothetical protein (DUF1644)
AT1G17090	3	0.00064892	NA	NA	4	5.73e-05	AT1G17090	transmembrane protein
AT1G20310	3	0.00076274	NA	NA	NA	NA	AT1G20310	syringolide-induced protein
AT1G25370	3	0.00063239	NA	NA	3	1.63e-05	AT1G25370	hypothetical protein (DUF1639)
AT1G30620	3	0.00076274	NA	NA	9	0.00047236	MUR4	NAD(P)-binding Rossmann-fold superfamily protein
AT1G51760	3	0.00076274	NA	NA	9	0.00056111	IAR3	peptidase M20/M25/M40 family protein
AT1G55020	3	0.00063239	NA	NA	7	0.00025445	LOX1	lipoxygenase 1
AT1G59820	3	0.00024227	NA	NA	4	7.11e-05	ALA3	aminophospholipid ATPase 3
AT1G59950	3	0.00049435	NA	NA	3	1.63e-05	AT1G59950	NAD(P)-linked oxidoreductase superfamily protein
AT1G64065	3	0.00018245	1	0	9	0.00019039	AT1G64065	Late embryogenesis abundant (LEA) hydroxyproline-rich glycoprotein family
AT1G64610	3	0.00046048	1	0	24	0.00141691	AT1G64610	Transducin/WD40 repeat-like superfamily protein
AT1G66090	3	0.00051225	1	0	9	0.00011639	AT1G66090	Disease resistance protein (TIR-NBS class)
AT1G68630	3	0.00063239	NA	NA	6	6.65e-05	AT1G68630	PLAC8 family protein
AT1G69960	3	0.00063239	NA	NA	7	0.00018178	PP2A	serine/threonine protein phosphatase 2A
AT1G73500	3	0.00036959	NA	NA	NA	NA	MKK9	MAP kinase kinase 9
AT1G74590	3	0.00046048	1	0	10	0.00019369	GSTU10	glutathione S-transferase TAU 10
AT1G75020	3	0.00063239	NA	NA	8	0.00026803	LPAT4	lysophosphatidyl acyltransferase 4
AT1G76070	3	0.00063239	NA	NA	7	0.00024198	AT1G76070	hypothetical protein
AT1G76520	3	0.00022471	1	0	17	0.00029037	AT1G76520	Auxin efflux carrier family protein
AT1G76970	3	0.00077586	4	0.00364829	19	0.00088136	AT1G76970	Target of Myb protein 1
AT2G03505	3	0.00064892	2	0.00046147	21	0.0008197	AT2G03505	Carbohydrate-binding X8 domain superfamily protein
AT2G05940	3	0.00037189	2	0.00046147	26	0.00176399	RIPK	Protein kinase superfamily protein
AT2G13650	3	0.00076274	NA	NA	4	0.0001043	GONST1	golgi nucleotide sugar transporter 1
AT2G14290	3	0.00107924	NA	NA	6	0.0001768	AT2G14290	LL-diaminopimelate protein (DUF295)
AT2G17500	3	0.00063239	NA	NA	9	0.00032808	AT2G17500	Auxin efflux carrier family protein
AT2G22250	3	0.00017157	NA	NA	7	0.0001693	AAT	aspartate aminotransferase
AT2G22500	3	0.00076274	NA	NA	2	2.17e-05	UCP5	uncoupling protein 5
AT2G26650	3	0.00014403	NA	NA	4	2.02e-05	KT1	K transporter 1
AT2G29990	3	0.00097408	1	0	11	0.00038235	NDA2	alternative NAD(P)H dehydrogenase 2
AT2G30362	3	0.00036959	NA	NA	2	1.82e-05	AT2G30362	Natural antisense transcript overlaps with AT2G30360
AT2G30750	3	0.00064892	NA	NA	7	0.00029364	CYP71A12	cytochrome P450 family 71 polypeptide
AT2G30870	3	0.00017157	NA	NA	12	0.00066989	GSTF10	glutathione S-transferase PHI 10
AT2G31820	3	0.00059835	NA	NA	5	0.0001086	AT2G31820	Ankyrin repeat family protein
AT2G31955	3	0.00063239	1	0	6	4.79e-05	CNX2	cofactor of nitrate reductase and xanthine dehydrogenase 2
AT2G32140	3	0.00063239	NA	NA	9	0.00027495	AT2G32140	transmembrane receptor
AT2G38860	3	0.00021336	4	0.00152173	20	0.00069003	YLS5	Class I glutamine amidotransferase-like superfamily protein
AT2G39480	3	0.00076274	NA	NA	10	0.00047689	ABCB6	P-glycoprotein 6
AT2G43000	3	0.00107924	NA	NA	5	0.00019227	NAC042	NAC domain containing protein 42
AT3G01650	3	0.00063239	NA	NA	8	0.00034609	RGLG1	RING domain ligase1
AT3G13110	3	0.00036959	NA	NA	4	0.00013116	SERAT2;2	serine acetyltransferase 2;2
AT3G14050	3	0.00036959	NA	NA	6	0.00029462	RSH2	RELA/SPOT homolog 2
AT3G19970	3	0.0002062	NA	NA	3	1.63e-05	AT3G19970	alpha/beta-Hydrolases superfamily protein
AT3G25250	3	0.00046048	3	0.00078674	12	0.00026931	AGC2-1	AGC (cAMP-dependent, cGMP-dependent and protein kinase C) kinase family protein
AT3G43240	3	0.00024227	NA	NA	5	0.00014809	AT3G43240	ARID/BRIGHT DNA-binding domain-containing protein
AT3G54640	3	0.00064892	NA	NA	2	3.51e-06	TSA1	tryptophan synthase alpha chain
AT3G55970	3	0.00063239	NA	NA	6	0.00013481	JRG21	jasmonate-regulated gene 21
AT3G63310	3	0.00036959	NA	NA	9	0.00052912	BIL4	Bax inhibitor-1 family protein
AT4G17230	3	0.00015973	NA	NA	NA	NA	SCL13	SCARECROW-like 13
AT4G19460	3	0.00063239	NA	NA	12	0.00050246	AT4G19460	UDP-Glycosyltransferase superfamily protein
AT4G20860	3	0.00030172	8	0.00983844	24	0.00104967	AT4G20860	FAD-binding Berberine family protein
AT4G23700	3	0.00024227	NA	NA	6	0.00022869	CHX17	cation/H exchanger 17
AT4G24380	3	0.00064892	NA	NA	2	1.35e-05	AT4G24380	dihydrofolate reductase
AT4G25030	3	0.00107924	NA	NA	8	0.00044211	AT4G25030	Serine/Threonine-kinase
AT4G27070	3	0.00063239	NA	NA	8	0.0002324	TSB2	tryptophan synthase beta-subunit 2
AT4G31950	3	9.33e-05	3	0.00121006	10	0.00034634	CYP82C3	cytochrome P450, family 82, subfamily C, polypeptide 3
AT4G34150	3	0.00044108	1	0	8	8.74e-05	AT4G34150	Calcium-dependent lipid-binding (CaLB domain) family protein
AT4G34230	3	0.00063239	NA	NA	11	0.00073829	CAD5	cinnamyl alcohol dehydrogenase 5
AT4G34710	3	0.00036959	NA	NA	11	0.00070399	ADC2	arginine decarboxylase 2
AT5G01380	3	0.00064892	1	0	1	0	AT5G01380	Homeodomain-like superfamily protein
AT5G01500	3	0.00063239	NA	NA	8	0.00027395	TAAC	thylakoid ATP/ADP carrier
AT5G05730	3	0.00064892	NA	NA	7	0.00026175	ASA1	anthranilate synthase alpha subunit 1
AT5G08300	3	0.00021287	2	0.00046147	21	0.00100276	AT5G08300	Succinyl-CoA ligase, alpha subunit
AT5G10520	3	0.00039766	NA	NA	5	4.64e-05	RBK1	ROP binding protein kinases 1
AT5G11670	3	0.00049435	NA	NA	3	5.31e-05	NADP-ME2	NADP-malic enzyme 2
AT5G13190	3	0.00044108	1	0	13	0.00035323	GILP	GSH-induced LITAF domain protein
AT5G13280	3	0.00064892	NA	NA	10	0.00056391	AK-LYS1	aspartate kinase 1
AT5G17770	3	0.00076274	1	0	23	0.00136217	CBR	NADH:cytochrome B5 reductase 1
AT5G17990	3	0.00021336	1	0	13	0.00044206	TRP1	tryptophan biosynthesis 1
AT5G24430	3	0.00021671	NA	NA	2	3.4e-05	AT5G24430	Calcium-dependent protein kinase (CDPK) family protein
AT5G34930	3	0.00225024	NA	NA	2	1.82e-05	AT5G34930	arogenate dehydrogenase
AT5G35735	3	0.00022232	3	0.00184622	26	0.00131547	AT5G35735	Auxin-responsive family protein
AT5G49830	3	0.00036959	NA	NA	3	6.65e-05	EXO84B	exocyst complex component 84B
AT5G50570	3	0.00076274	NA	NA	NA	NA	SPL13A	Squamosa promoter-binding protein-like (SBP domain) transcription factor family protein
AT5G50670	3	0.00076274	NA	NA	NA	NA	SPL13B	Squamosa promoter-binding protein-like (SBP domain) transcription factor family protein
AT5G50850	3	0.00077586	1	0	19	0.00361242	MAB1	Transketolase family protein
AT5G57890	3	0.00024227	NA	NA	9	0.00038582	AT5G57890	Glutamine amidotransferase type 1 family protein
AT5G59550	3	0.00142147	NA	NA	6	0.00018591	RDUF2	zinc finger (C3HC4-type RING finger) family protein
AT5G64300	3	0.00064892	NA	NA	11	0.00048487	GCH	GTP cyclohydrolase II
AT5G65300	3	0.00063239	NA	NA	10	0.00053963	AT5G65300	hypothetical protein
AT5G66070	3	0.00107946	NA	NA	6	0.00010159	AT5G66070	RING/U-box superfamily protein
Bcin01g08220.1	3	7.96e-06	6	0.00019112	18	3.27e-05	oxidoreductase [Botrytis cinerea T4]	F:oxidoreductase activity; F:ion binding
Bcin06g07120.1	3	0.00216017	1	0	37	0.00137986	salicylate hydroxylase	F:oxidoreductase activity; F:ion binding
Bcin11g00390.1	3	9.56e-06	NA	NA	NA	NA	hypothetical protein BC1G_09645 [Botrytis cinerea B05.10]	F:protein binding
AT1G01560	2	0.0003848	4	0.00239037	10	0.0001729	MPK11	MAP kinase 11
AT1G08630	2	9.87e-05	NA	NA	5	9e-05	THA1	threonine aldolase 1
AT1G08800	2	0.00014885	NA	NA	5	6.25e-05	AT1G08800	myosin-binding protein (Protein of unknown function, DUF593)
AT1G09560	2	4.77e-05	2	0.00037551	15	0.0004684	GLP5	germin-like protein 5
AT1G10140	2	0.00073099	NA	NA	4	5.73e-05	AT1G10140	Uncharacterized conserved protein UCP031279
AT1G10290	2	5.3e-05	1	0	8	0.00025685	ADL6	dynamin-like protein 6
AT1G10990	2	0.00014885	NA	NA	NA	NA	AT1G10990	transmembrane protein
AT1G13210	2	4.68e-05	NA	NA	2	3.34e-05	ACA.l	autoinhibited Ca2 /ATPase II
AT1G13340	2	4.77e-05	1	0	10	0.00023667	AT1G13340	Regulator of Vps4 activity in the MVB pathway protein
AT1G14040	2	9.87e-05	NA	NA	4	5.73e-05	AT1G14040	EXS (ERD1/XPR1/SYG1) family protein
AT1G15540	2	4.52e-05	NA	NA	1	0	AT1G15540	2-oxoglutarate-dependent dioxygenase-like protein
AT1G16670	2	0.0003848	NA	NA	10	0.00048636	AT1G16670	Protein kinase superfamily protein
AT1G17420	2	0.0003848	NA	NA	NA	NA	LOX3	lipoxygenase 3
AT1G18210	2	0.0003848	1	0	24	0.00119297	AT1G18210	Calcium-binding EF-hand family protein
AT1G19180	2	0.0003848	NA	NA	4	9.49e-05	JAZ1	jasmonate-zim-domain protein 1
AT1G20510	2	6.7e-05	NA	NA	NA	NA	OPCL1	OPC-8:0 CoA ligase1
AT1G24140	2	6.7e-05	NA	NA	1	0	AT1G24140	Matrixin family protein
AT1G24180	2	0.00014885	NA	NA	12	0.00061116	IAR4	Thiamin diphosphate-binding fold (THDP-binding) superfamily protein
AT1G26420	2	0.00036772	3	0.00080501	1	0	AT1G26420	FAD-binding Berberine family protein
AT1G27730	2	0.0003848	NA	NA	8	0.00017897	STZ	salt tolerance zinc finger
AT1G29330	2	0.0003848	NA	NA	7	0.00035295	ERD2	ER lumen protein retaining receptor family protein
AT1G30420	2	7.66e-05	NA	NA	9	0.00031798	ABCC11	multidrug resistance-associated protein 12
AT1G30755	2	0.0003848	1	0	7	0.00045868	AT1G30755	elongation factor G, putative (DUF668)
AT1G31130	2	0.0003848	1	0	11	0.00039894	AT1G31130	polyadenylate-binding protein 1-B-binding protein
AT1G32350	2	4.77e-05	2	0.00048213	4	7.74e-06	AOX1D	alternative oxidase 1D
AT1G32940	2	0.0002483	4	0.00499873	26	0.00118515	SBT3.5	Subtilase family protein
AT1G33600	2	6.7e-05	NA	NA	5	0.00013305	AT1G33600	Leucine-rich repeat (LRR) family protein
AT1G42990	2	6.7e-05	NA	NA	2	2.17e-05	BZIP60	basic region/leucine zipper motif 60
AT1G44350	2	0.0003848	NA	NA	1	0	ILL6	IAA-amino acid hydrolase ILR1-like 6
AT1G50430	2	0.00014885	NA	NA	6	0.00024745	DWF5	Ergosterol biosynthesis ERG4/ERG24 family
AT1G56145	2	0.00014885	NA	NA	5	5.51e-05	AT1G56145	Leucine-rich repeat transmembrane protein kinase
AT1G58340	2	3.1e-05	1	0	18	0.00066911	ZF14	MATE efflux family protein
AT1G60730	2	0.00014885	2	0.00046147	22	0.00073665	AT1G60730	NAD(P)-linked oxidoreductase superfamily protein
AT1G66580	2	0.0009953	3	0.00113572	17	0.00068343	SAG24	senescence associated gene 24
AT1G67810	2	0.00011812	1	0	28	0.00090016	SUFE2	sulfur E2
AT1G67850	2	0.00010577	NA	NA	3	6.31e-06	AT1G67850	lysine ketoglutarate reductase trans-splicing protein (DUF707)
AT1G73810	2	0.0003848	NA	NA	3	4.18e-05	AT1G73810	Core-2/I-branching beta-1,6-N-acetylglucosaminyltransferase family protein
AT1G74030	2	9.87e-05	NA	NA	6	0.00013481	ENO1	enolase 1
AT1G79930	2	6.7e-05	NA	NA	8	0.00037181	HSP91	heat shock protein 91
AT2G01340	2	0.00010577	NA	NA	3	6.99e-05	At17.1	plastid movement impaired protein
AT2G15480	2	0.00014885	6	0.00632969	20	0.0004422	UGT73B5	UDP-glucosyl transferase 73B5
AT2G15490	2	0.00014885	8	0.0142891	16	0.00033532	UGT73B4	UDP-glycosyltransferase 73B4
AT2G20420	2	0.00011812	1	0	19	0.00099304	AT2G20420	ATP citrate lyase (ACL) family protein
AT2G22880	2	5.14e-06	1	0	2	3.88e-06	AT2G22880	VQ motif-containing protein
AT2G27389	2	3.94e-05	2	0.00048213	10	0.00015125	AT2G27389	hypothetical protein
AT2G29480	2	0.00014885	NA	NA	1	0	GSTU2	glutathione S-transferase tau 2
AT2G29490	2	0.00014885	NA	NA	3	3.49e-05	GSTU1	glutathione S-transferase TAU 1
AT2G30020	2	0.00032671	NA	NA	2	2.17e-05	AT2G30020	Protein phosphatase 2C family protein
AT2G30360	2	0.0003848	NA	NA	3	7.69e-05	SIP4	SOS3-interacting protein 4
AT2G31230	2	0.00036772	NA	NA	4	8.13e-05	ERF15	ethylene-responsive element binding factor 15
AT2G34250	2	6.7e-05	NA	NA	7	0.00028128	AT2G34250	SecY protein transport family protein
AT2G34500	2	0.00014031	4	0.00152173	8	0.00012734	CYP710A1	cytochrome P450, family 710, subfamily A, polypeptide 1
AT2G35390	2	0.00036772	6	0.00595792	27	0.00156327	AT2G35390	Phosphoribosyltransferase family protein
AT2G36880	2	6.7e-05	NA	NA	6	0.00022328	MAT3	methionine adenosyltransferase 3
AT2G37940	2	0.00036772	1	0	18	0.00084635	AtIPCS2	Inositol phosphorylceramide synthase 2
AT2G40140	2	6.7e-05	NA	NA	2	8.82e-06	CZF1	zinc finger (CCCH-type) family protein
AT2G41880	2	0.00014885	NA	NA	3	1.63e-05	GK-1	guanylate kinase 1
AT2G43160	2	6.7e-05	NA	NA	10	0.0005233	AT2G43160	ENTH/VHS family protein
AT2G44480	2	2.6e-05	NA	NA	NA	NA	BGLU17	beta glucosidase 17
AT2G45760	2	0.0003848	1	0	13	0.00044738	BAP2	BON association protein 2
AT2G46140	2	0.00014885	3	0.00256968	16	0.00038882	AT2G46140	Late embryogenesis abundant protein
AT2G46620	2	6.7e-05	NA	NA	NA	NA	AT2G46620	P-loop containing nucleoside triphosphate hydrolases superfamily protein
AT2G46650	2	9.87e-05	NA	NA	10	0.00061432	CB5-C	cytochrome B5 isoform C
AT2G47650	2	0.0003848	NA	NA	7	0.00010818	UXS4	UDP-xylose synthase 4
AT3G02800	2	0.00032671	NA	NA	4	7.11e-05	PFA-DSP3	Tyrosine phosphatase family protein
AT3G06490	2	0.0003848	NA	NA	8	0.00016782	MYB108	myb domain protein 108
AT3G08580	2	6.7e-05	NA	NA	12	0.00077557	AAC1	ADP/ATP carrier 1
AT3G08720	2	0.0003848	NA	NA	2	3.34e-05	S6K2	serine/threonine protein kinase 2
AT3G09000	2	6.7e-05	NA	NA	10	0.00040483	AT3G09000	proline-rich family protein
AT3G11820	2	6.7e-05	NA	NA	NA	NA	SYP121	syntaxin of plants 121
AT3G12740	2	0.0009953	1	0	19	0.00061115	ALIS1	ALA-interacting subunit 1
AT3G15500	2	0.00053897	NA	NA	9	0.00032808	NAC3	NAC domain containing protein 3
AT3G16150	2	0.00014885	NA	NA	5	6.25e-05	ASPGB1	N-terminal nucleophile aminohydrolases (Ntn hydrolases) superfamily protein
AT3G16530	2	8.01e-05	1	0	12	0.00017846	AT3G16530	Legume lectin family protein
AT3G16860	2	0.0003848	NA	NA	8	0.00040176	COBL8	COBRA-like protein 8 precursor
AT3G17240	2	0.0002483	2	0.00046147	46	0.00357676	mtLPD2	lipoamide dehydrogenase 2
AT3G18950	2	0.0003848	NA	NA	5	0.00020844	AT3G18950	Transducin/WD40 repeat-like superfamily protein
AT3G20410	2	0.00036772	NA	NA	2	8.82e-06	CPK9	calmodulin-domain protein kinase 9
AT3G20490	2	0.0003848	NA	NA	6	6.44e-05	AT3G20490	Rho GTPase-activating protein
AT3G22260	2	0.00014885	NA	NA	6	0.00016881	AT3G22260	Cysteine proteinases superfamily protein
AT3G22290	2	0.0003848	NA	NA	7	0.00031613	AT3G22290	Endoplasmic reticulum vesicle transporter protein
AT3G22370	2	0.0002483	1	0	20	0.00083691	AOX1A	alternative oxidase 1A
AT3G22980	2	7.26e-05	NA	NA	9	0.00035765	AT3G22980	Ribosomal protein S5/Elongation factor G/III/V family protein
AT3G24530	2	0.0003848	NA	NA	1	0	AT3G24530	AAA-type ATPase family protein / ankyrin repeat family protein
AT3G24550	2	0.0003848	NA	NA	8	0.00034609	PERK1	proline extensin-like receptor kinase 1
AT3G25490	2	0.000228	NA	NA	3	5.31e-05	AT3G25490	Protein kinase family protein
AT3G25900	2	6.35e-05	NA	NA	8	0.00043172	HMT-1	Homocysteine S-methyltransferase family protein
AT3G26190	2	9.87e-05	NA	NA	4	2.02e-05	CYP71B21	cytochrome P450, family 71, subfamily B, polypeptide 21
AT3G26500	2	3.43e-06	1	0	1	0	PIRL2	plant intracellular ras group-related LRR 2
AT3G48890	2	0.00036772	NA	NA	2	8.82e-06	MAPR3	membrane-associated progesterone binding protein 3
AT3G49110	2	0.0003848	NA	NA	NA	NA	PRXCA	peroxidase CA
AT3G49810	2	6.7e-05	NA	NA	3	1.63e-05	AT3G49810	ARM repeat superfamily protein
AT3G50260	2	0.0003848	NA	NA	7	0.00024776	CEJ1	cooperatively regulated by ethylene and jasmonate 1
AT3G51895	2	0.0003848	NA	NA	10	0.00023696	SULTR3;1	sulfate transporter 3;1
AT3G53260	2	7.35e-05	NA	NA	1	0	PAL2	phenylalanine ammonia-lyase 2
AT3G54110	2	0.0003848	NA	NA	6	0.00017624	PUMP1	plant uncoupling mitochondrial protein 1
AT3G54620	2	0.00014885	NA	NA	7	0.00027243	BZIP25	basic leucine zipper 25
AT3G54950	2	0.0003848	NA	NA	2	1.32e-05	pPLAIIIbeta	patatin-like protein 6
AT3G55270	2	6.49e-05	NA	NA	4	7.3e-05	MKP1	mitogen-activated protein kinase phosphatase 1
AT3G55430	2	0.0003848	NA	NA	11	0.00055434	AT3G55430	O-Glycosyl hydrolases family 17 protein
AT3G55470	2	0.00036772	NA	NA	1	0	AT3G55470	Calcium-dependent lipid-binding (CaLB domain) family protein
AT3G55620	2	6.7e-05	NA	NA	3	7.8e-05	eIF6A	Translation initiation factor IF6
AT3G55880	2	0.00036717	NA	NA	NA	NA	SUE4	Alpha/beta hydrolase related protein
AT3G57380	2	0.00014885	NA	NA	1	0	AT3G57380	Glycosyltransferase family 61 protein
AT3G57390	2	0.00014885	NA	NA	1	0	AGL18	AGAMOUS-like 18
AT3G57550	2	4.77e-05	1	0	16	0.00050114	AGK2	guanylate kinase
AT3G57630	2	0.0003848	NA	NA	8	0.00042587	AT3G57630	exostosin family protein
AT3G62830	2	0.0003848	NA	NA	5	0.00020844	AUD1	NAD(P)-binding Rossmann-fold superfamily protein
AT4G00300	2	0.00036772	NA	NA	NA	NA	AT4G00300	receptor-like kinase
AT4G01850	2	6.7e-05	NA	NA	2	2.71e-05	SAM-2	S-adenosylmethionine synthetase 2
AT4G01950	2	0.0003848	NA	NA	NA	NA	GPAT3	glycerol-3-phosphate acyltransferase 3
AT4G02350	2	9.87e-05	NA	NA	13	0.00075855	SEC15B	exocyst complex component sec15B
AT4G02520	2	0.0003848	5	0.0032949	3	9.06e-06	GSTF2	glutathione S-transferase PHI 2
AT4G05390	2	8.77e-05	2	0.00010853	25	0.00094942	RFNR1	root FNR 1
AT4G11480	2	2.45e-05	2	0.00018747	1	0	CRK32	cysteine-rich RLK (RECEPTOR-like protein kinase) 32
AT4G12120	2	0.00030397	2	0.00046147	20	0.00096645	SEC1B	Sec1/munc18-like (SM) proteins superfamily
AT4G14230	2	0.00030568	NA	NA	2	8.82e-06	AT4G14230	CBS domain protein with a domain protein (DUF21)
AT4G18050	2	0.00014885	NA	NA	8	0.00015721	ABCB9	P-glycoprotein 9
AT4G19110	2	6.7e-05	NA	NA	9	0.00039571	AT4G19110	Protein kinase superfamily protein
AT4G21390	2	6.7e-05	NA	NA	3	1.63e-05	B120	S-locus lectin protein kinase family protein
AT4G21680	2	0.00020828	NA	NA	2	5.05e-06	NRT1.8	NITRATE TRANSPORTER 1.8
AT4G21790	2	0.0003848	NA	NA	6	0.00024263	TOM1	tobamovirus multiplication 1
AT4G22980	2	0.0003848	1	0	3	4.26e-06	AT4G22980	molybdenum cofactor sulfurase-like protein
AT4G23100	2	6.27e-05	NA	NA	9	0.00032808	GSH1	glutamate-cysteine ligase
AT4G23730	2	6.7e-05	NA	NA	NA	NA	AT4G23730	Galactose mutarotase-like superfamily protein
AT4G24340	2	4.68e-05	NA	NA	4	2.02e-05	AT4G24340	Phosphorylase superfamily protein
AT4G24390	2	0.00014885	NA	NA	4	3.96e-05	AFB4	RNI-like superfamily protein
AT4G26270	2	3.94e-05	10	0.0109067	19	0.00083828	PFK3	phosphofructokinase 3
AT4G29210	2	0.0003848	NA	NA	10	0.0006644	GGT4	gamma-glutamyl transpeptidase 4
AT4G30530	2	9.87e-05	NA	NA	8	0.00032885	GGP1	Class I glutamine amidotransferase-like superfamily protein
AT4G30850	2	6.7e-05	NA	NA	NA	NA	HHP2	heptahelical transmembrane protein2
AT4G33430	2	6.7e-05	2	8.92e-05	7	0.00012294	BAK1	BRI1-associated receptor kinase
AT4G34131	2	3.94e-05	11	0.0170426	22	0.00099538	UGT73B3	UDP-glucosyl transferase 73B3
AT4G36480	2	0.0003848	NA	NA	5	5.51e-05	LCB1	long-chain base1
AT4G36990	2	3.94e-05	1	0	15	0.00031881	HSF4	heat shock factor 4
AT4G37520	2	0.00014885	NA	NA	3	5.71e-06	AT4G37520	Peroxidase superfamily protein
AT4G38545	2	0.00030568	NA	NA	3	1.63e-05	AT4G38545	Natural antisense transcript overlaps with AT4G38530 and AT4G38540
AT4G39980	2	9.87e-05	NA	NA	3	4.67e-05	DHS1	3-deoxy-D-arabino-heptulosonate 7-phosphate synthase 1
AT5G02780	2	0.00036772	1	0	NA	NA	GSTL1	glutathione transferase lambda 1
AT5G03160	2	0.0002483	1	0	10	0.00034587	P58IPK	DnaJ P58IPK-like protein
AT5G03330	2	0.00014885	NA	NA	10	0.00038404	AT5G03330	Cysteine proteinases superfamily protein
AT5G04340	2	0.0003848	NA	NA	5	0.00011514	ZAT6	6
AT5G04590	2	0.0001217	NA	NA	11	0.0006467	SIR	sulfite reductase
AT5G05850	2	6.7e-05	NA	NA	NA	NA	PIRL1	plant intracellular ras group-related LRR 1
AT5G08790	2	0.0003848	5	0.00455964	29	0.00177253	ATAF2	NAC (No Apical Meristem) domain transcriptional regulator superfamily protein
AT5G09800	2	6.7e-05	NA	NA	1	0	AT5G09800	ARM repeat superfamily protein
AT5G12890	2	7.26e-05	NA	NA	NA	NA	AT5G12890	UDP-Glycosyltransferase superfamily protein
AT5G13200	2	6.7e-05	NA	NA	2	1.82e-05	AT5G13200	GRAM domain family protein
AT5G13490	2	1.34e-05	2	0.00046147	35	0.00243587	AAC2	ADP/ATP carrier 2
AT5G13500	2	0.00031096	NA	NA	11	0.00058982	AT5G13500	Hyp O-arabinosyltransferase-like protein
AT5G13750	2	0.00014885	NA	NA	1	0	ZIFL1	zinc induced facilitator-like 1
AT5G14040	2	6.71e-05	1	0	27	0.00189858	PHT3;1	phosphate transporter 3;1
AT5G15490	2	6.7e-05	NA	NA	11	0.0005826	UGD3	UDP-glucose 6-dehydrogenase family protein
AT5G15650	2	6.7e-05	NA	NA	1	0	RGP2	reversibly glycosylated polypeptide 2
AT5G17350	2	4.68e-05	NA	NA	1	0	AT5G17350	hypothetical protein
AT5G17390	2	0.00014885	NA	NA	4	5.08e-05	AT5G17390	Adenine nucleotide alpha hydrolases-like superfamily protein
AT5G20910	2	0.0003848	NA	NA	3	5.55e-05	AIP2	RING/U-box superfamily protein
AT5G24810	2	0.00064492	6	0.00462634	24	0.0021213	AT5G24810	ABC1 family protein
AT5G26030	2	6.7e-05	NA	NA	4	4.8e-05	FC1	ferrochelatase 1
AT5G27420	2	0.0003848	NA	NA	2	8.82e-06	CNI1	carbon/nitrogen insensitive 1
AT5G27520	2	0.0003848	NA	NA	9	0.000392	PNC2	peroxisomal adenine nucleotide carrier 2
AT5G38900	2	0.00036772	3	0.00113572	3	7.4e-06	AT5G38900	Thioredoxin superfamily protein
AT5G39050	2	0.0002483	7	0.011303	19	0.00062008	PMAT1	HXXXD-type acyl-transferase family protein
AT5G41990	2	0.00014885	NA	NA	12	0.00065185	WNK8	with no lysine (K) kinase 8
AT5G42380	2	0.0003848	3	0.0007596	24	0.00123867	CML37	calmodulin like 37
AT5G45410	2	7.26e-05	NA	NA	9	0.00052491	AT5G45410	zinc finger B-box protein
AT5G48540	2	4.82e-05	1	0	2	5.9e-07	AT5G48540	receptor-like protein kinase-related family protein
AT5G52400	2	9.27e-05	NA	NA	3	6.8e-05	CYP715A1	cytochrome P450, family 715, subfamily A, polypeptide 1
AT5G53050	2	0.0003848	NA	NA	NA	NA	AT5G53050	alpha/beta-Hydrolases superfamily protein
AT5G54960	2	0.00030568	NA	NA	1	0	PDC2	pyruvate decarboxylase-2
AT5G60410	2	6.7e-05	NA	NA	4	2.98e-05	SIZ1	DNA-binding protein with MIZ/SP-RING zinc finger, PHD-finger and SAP domain-containing protein
AT5G63130	2	0.0003848	NA	NA	NA	NA	AT5G63130	Octicosapeptide/Phox/Bem1p family protein
AT5G63490	2	0.0003848	NA	NA	7	0.00019242	AT5G63490	CBS / octicosapeptide/Phox/Bemp1 (PB1) domains-containing protein
AT5G64660	2	0.00036772	1	0	8	6.99e-05	CMPG2	CYS, MET, PRO, and GLY protein 2
AT5G66200	2	6.7e-05	NA	NA	2	2.72e-06	ARO2	armadillo repeat only 2
AT5G67310	2	0.0003848	NA	NA	11	0.00073389	CYP81G1	cytochrome P450, family 81, subfamily G, polypeptide 1
AT5G67500	2	0.0003848	NA	NA	11	0.00063451	VDAC2	voltage dependent anion channel 2
Bcin02g05890.1	2	2.14e-06	NA	NA	NA	NA	cral trio domain-containing	no GO terms
Bcin04g01080.1	2	1.33e-06	NA	NA	NA	NA	5-methyltetrahydropteroyltriglutamate-homocysteine methyltransferase [Botrytis cinerea T4]	P:methionine biosynthetic process; F:zinc ion binding; P:cellular amino acid biosynthetic process; F:methyltransferase activity; F:transferase activity; F:5-methyltetrahydropteroyltriglutamate-homocysteine S-methyltransferase activity; P:methylation
Bcin05g07120.1	2	2.24e-06	NA	NA	NA	NA	short-chain dehydrogenase reductase SDR [Botrytis cinerea T4]	F:oxidoreductase activity
Bcin11g01090.1	2	1.87e-06	NA	NA	22	2.59e-05	predicted protein	no GO terms
Bcin11g02280.1	2	1.08e-05	NA	NA	2	1.9e-07	glycoside hydrolase family 5 [Botrytis cinerea T4]	P:carbohydrate metabolic process; F:hydrolase activity, hydrolyzing O-glycosyl compounds
Bcin12g06400.1	2	2.43e-06	NA	NA	92	0.00176616	BcBOT3,CND11p	F:oxidoreductase activity; F:ion binding; C:cellular_component
AT1G01820	1	0	NA	NA	3	1.4e-05	PEX11C	peroxin 11c
AT1G02400	1	0	NA	NA	5	0.00012364	GA2OX6	gibberellin 2-oxidase 6
AT1G04780	1	0	NA	NA	6	0.00029462	AT1G04780	Ankyrin repeat family protein
AT1G06050	1	0	NA	NA	NA	NA	AT1G06050	ENHANCED DISEASE RESISTANCE-like protein (DUF1336)
AT1G07030	1	0	3	0.00240425	3	5.68e-06	AT1G07030	Mitochondrial substrate carrier family protein
AT1G07135	1	0	NA	NA	4	5.08e-05	AT1G07135	glycine-rich protein
AT1G07240	1	0	NA	NA	NA	NA	UGT71C5	UDP-glucosyl transferase 71C5
AT1G07260	1	0	NA	NA	3	1.63e-05	UGT71C3	UDP-glucosyl transferase 71C3
AT1G07890	1	0	NA	NA	13	0.00069463	APX1	ascorbate peroxidase 1
AT1G08250	1	0	NA	NA	2	1.82e-05	ADT6	arogenate dehydratase 6
AT1G08860	1	0	NA	NA	5	0.00022705	BON3	Calcium-dependent phospholipid-binding Copine family protein
AT1G09932	1	0	3	0.00297147	15	0.00045691	AT1G09932	Phosphoglycerate mutase family protein
AT1G10040	1	0	1	0	20	0.00079109	AT1G10040	alpha/beta-Hydrolases superfamily protein
AT1G10410	1	0	NA	NA	9	0.00032808	AT1G10410	CW14 protein (DUF1336)
AT1G10585	1	0	1	0	17	0.00063486	AT1G10585	basic helix-loop-helix (bHLH) DNA-binding superfamily protein
AT1G11310	1	0	1	0	6	4.94e-05	MLO2	Seven transmembrane MLO family protein
AT1G11580	1	0	NA	NA	NA	NA	PMEPCRA	methylesterase PCR A
AT1G11890	1	0	NA	NA	NA	NA	SEC22	Synaptobrevin family protein
AT1G11925	1	0	NA	NA	3	3.02e-05	AT1G11925	Stigma-specific Stig1 family protein
AT1G14170	1	0	NA	NA	7	0.00010903	AT1G14170	RNA-binding KH domain-containing protein
AT1G14330	1	0	NA	NA	5	0.0001608	AT1G14330	Galactose oxidase/kelch repeat superfamily protein
AT1G14810	1	0	NA	NA	6	0.00020439	AT1G14810	semialdehyde dehydrogenase family protein
AT1G15110	1	0	NA	NA	1	0	PSS1	phosphatidyl serine synthase family protein
AT1G15140	1	0	NA	NA	NA	NA	AT1G15140	FAD/NAD(P)-binding oxidoreductase
AT1G15385	1	0	NA	NA	7	0.00014953	AT1G15385	cotton fiber protein
AT1G17170	1	0	4	0.00498188	9	0.00019097	GSTU24	glutathione S-transferase TAU 24
AT1G18500	1	0	NA	NA	7	0.00023109	MAML-4	methylthioalkylmalate synthase-like 4
AT1G19020	1	0	1	0	2	1.4e-07	AT1G19020	CDP-diacylglycerol-glycerol-3-phosphate 3-phosphatidyltransferase
AT1G19130	1	0	NA	NA	2	2.35e-06	AT1G19130	RmlC-like jelly roll fold protein
AT1G19650	1	0	NA	NA	1	0	AT1G19650	Sec14p-like phosphatidylinositol transfer family protein
AT1G20980	1	0	NA	NA	2	1.82e-05	SPL14	squamosa promoter binding protein-like 14
AT1G21240	1	0	1	0	2	2.38e-06	WAK3	wall associated kinase 3
AT1G22400	1	0	NA	NA	10	0.00038404	UGT85A1	UDP-Glycosyltransferase superfamily protein
AT1G23550	1	0	NA	NA	3	4.38e-05	SRO2	similar to RCD one 2
AT1G23710	1	0	NA	NA	4	0.0001043	AT1G23710	hypothetical protein (DUF1645)
AT1G24800	1	0	NA	NA	NA	NA	AT1G24800	F-box family protein
AT1G24909	1	0	NA	NA	12	0.00086578	AT1G24909	Glutamine amidotransferase type 1 family protein
AT1G25400	1	0	NA	NA	6	0.00021876	AT1G25400	transmembrane protein
AT1G25550	1	0	NA	NA	6	0.00027253	AT1G25550	myb-like transcription factor family protein
AT1G26380	1	0	NA	NA	NA	NA	AT1G26380	FAD-binding Berberine family protein
AT1G26390	1	0	NA	NA	2	1.19e-05	AT1G26390	FAD-binding Berberine family protein
AT1G26410	1	0	NA	NA	2	1.19e-05	AT1G26410	FAD-binding Berberine family protein
AT1G27100	1	0	NA	NA	2	3.4e-05	AT1G27100	Actin cross-linking protein
AT1G27130	1	0	NA	NA	1	0	GSTU13	glutathione S-transferase tau 13
AT1G27760	1	0	NA	NA	4	7.6e-05	SAT32	interferon-related developmental regulator family protein / IFRD protein family
AT1G28180	1	0	NA	NA	5	6.25e-05	AT1G28180	DEAD-box ATP-dependent RNA helicase-like protein
AT1G28240	1	0	NA	NA	8	0.00016226	AT1G28240	strawberry notch protein (DUF616)
AT1G28280	1	0	NA	NA	NA	NA	AT1G28280	VQ motif-containing protein
AT1G28380	1	0	NA	NA	NA	NA	NSL1	MAC/Perforin domain-containing protein
AT1G28480	1	0	NA	NA	3	5.82e-05	GRX480	Thioredoxin superfamily protein
AT1G32460	1	0	NA	NA	7	0.00022786	AT1G32460	hypothetical protein
AT1G33030	1	0	NA	NA	9	0.00052517	AT1G33030	O-methyltransferase family protein
AT1G33110	1	0	NA	NA	NA	NA	AT1G33110	MATE efflux family protein
AT1G33590	1	0	NA	NA	11	0.00063174	AT1G33590	Leucine-rich repeat (LRR) family protein
AT1G35910	1	0	NA	NA	NA	NA	TPPD	Haloacid dehalogenase-like hydrolase (HAD) superfamily protein
AT1G36622	1	0	NA	NA	NA	NA	AT1G36622	transmembrane protein
AT1G47510	1	0	NA	NA	4	3.38e-05	5PTASE11	inositol polyphosphate 5-phosphatase 11
AT1G47830	1	0	NA	NA	9	0.00050949	AT1G47830	SNARE-like superfamily protein
AT1G48040	1	0	NA	NA	NA	NA	AT1G48040	Protein phosphatase 2C family protein
AT1G49040	1	0	NA	NA	4	6.14e-05	SCD1	stomatal cytokinesis defective / SCD1 protein (SCD1)
AT1G50360	1	0	NA	NA	9	0.00040152	VIIIA	P-loop containing nucleoside triphosphate hydrolases superfamily protein
AT1G51660	1	0	NA	NA	3	6.8e-05	MKK4	mitogen-activated protein kinase kinase 4
AT1G55850	1	0	NA	NA	7	0.00014953	CSLE1	cellulose synthase like E1
AT1G56130	1	0	NA	NA	NA	NA	AT1G56130	Leucine-rich repeat transmembrane protein kinase
AT1G57610	1	0	NA	NA	4	0.0001043	AT1G57610	calcium uniporter (DUF607)
AT1G59910	1	0	NA	NA	1	0	AT1G59910	Actin-binding FH2 (formin homology 2) family protein
AT1G60780	1	0	NA	NA	5	0.00019454	HAP13	Clathrin adaptor complexes medium subunit family protein
AT1G61250	1	0	11	0.0128037	21	0.00167245	SC3	secretory carrier 3
AT1G61550	1	0	NA	NA	NA	NA	AT1G61550	S-locus lectin protein kinase family protein
AT1G61810	1	0	1	0	6	2.5e-06	BGLU45	beta-glucosidase 45
AT1G62420	1	0	NA	NA	NA	NA	AT1G62420	DUF506 family protein (DUF506)
AT1G63010	1	0	NA	NA	7	0.00017624	AT1G63010	Major Facilitator Superfamily with SPX (SYG1/Pho81/XPR1) domain-containing protein
AT1G64710	1	0	NA	NA	NA	NA	AT1G64710	GroES-like zinc-binding alcohol dehydrogenase family protein
AT1G65690	1	0	NA	NA	6	0.00024263	AT1G65690	Late embryogenesis abundant (LEA) hydroxyproline-rich glycoprotein family
AT1G66480	1	0	NA	NA	8	0.00021144	AT1G66480	plastid movement impaired 2
AT1G66600	1	0	NA	NA	3	3.79e-05	ABO3	ABA overly sensitive mutant 3
AT1G66690	1	0	NA	NA	12	0.00049021	AT1G66690	S-adenosyl-L-methionine-dependent methyltransferases superfamily protein
AT1G67070	1	0	NA	NA	2	1.19e-05	DIN9	Mannose-6-phosphate isomerase, type I
AT1G67800	1	0	1	0	11	0.00031317	AT1G67800	Copine (Calcium-dependent phospholipid-binding protein) family
AT1G68000	1	0	NA	NA	1	0	PIS1	phosphatidylinositol synthase 1
AT1G68310	1	0	NA	NA	NA	NA	AE7	MIP18 family protein (DUF59)
AT1G68340	1	0	NA	NA	2	2.17e-05	AT1G68340	hypothetical protein (DUF1639)
AT1G68370	1	0	NA	NA	6	0.00028134	ARG1	Chaperone DnaJ-domain superfamily protein
AT1G68390	1	0	NA	NA	1	0	AT1G68390	Core-2/I-branching beta-1,6-N-acetylglucosaminyltransferase family protein
AT1G68620	1	0	NA	NA	8	0.00041233	AT1G68620	alpha/beta-Hydrolases superfamily protein
AT1G69810	1	0	NA	NA	1	0	WRKY36	WRKY DNA-binding protein 36
AT1G69890	1	0	NA	NA	4	7.11e-05	AT1G69890	actin cross-linking protein (DUF569)
AT1G69920	1	0	NA	NA	NA	NA	GSTU12	glutathione S-transferase TAU 12
AT1G70740	1	0	NA	NA	4	0.00012751	AT1G70740	Protein kinase superfamily protein
AT1G71830	1	0	NA	NA	2	8.82e-06	SERK1	somatic embryogenesis receptor-like kinase 1
AT1G72120	1	0	NA	NA	5	0.00013987	AT1G72120	Major facilitator superfamily protein
AT1G72280	1	0	NA	NA	NA	NA	ERO1	endoplasmic reticulum oxidoreductins 1
AT1G72900	1	0	NA	NA	2	3.4e-05	AT1G72900	Toll-Interleukin-Resistance (TIR) domain-containing protein
AT1G73730	1	0	NA	NA	5	0.00013305	EIL3	ETHYLENE-INSENSITIVE3-like 3
AT1G74020	1	0	NA	NA	4	5.33e-05	SS2	strictosidine synthase 2
AT1G74950	1	0	NA	NA	NA	NA	TIFY10B	TIFY domain/Divergent CCT motif family protein
AT1G76140	1	0	NA	NA	5	0.00017348	AT1G76140	Prolyl oligopeptidase family protein
AT1G76150	1	0	NA	NA	8	0.00021905	ECH2	enoyl-CoA hydratase 2
AT1G76470	1	0	NA	NA	1	0	AT1G76470	NAD(P)-binding Rossmann-fold superfamily protein
AT1G76650	1	0	NA	NA	1	0	CML38	calmodulin-like 38
AT1G77370	1	0	NA	NA	1	0	AT1G77370	Glutaredoxin family protein
AT1G77840	1	0	NA	NA	14	0.00084703	AT1G77840	Translation initiation factor IF2/IF5
AT1G78460	1	0	NA	NA	3	1.63e-05	AT1G78460	SOUL heme-binding family protein
AT1G78570	1	0	1	0	5	9.35e-05	RHM1	rhamnose biosynthesis 1
AT1G78830	1	0	NA	NA	NA	NA	AT1G78830	Curculin-like (mannose-binding) lectin family protein
AT1G78870	1	0	NA	NA	1	0	UBC35	ubiquitin-conjugating enzyme 35
AT1G79450	1	0	NA	NA	NA	NA	ALIS5	ALA-interacting subunit 5
AT1G80280	1	0	NA	NA	3	7.14e-05	AT1G80280	alpha/beta-Hydrolases superfamily protein
AT2G02180	1	0	NA	NA	1	0	TOM3	tobamovirus multiplication protein 3
AT2G05710	1	0	NA	NA	4	9.99e-05	ACO3	aconitase 3
AT2G14620	1	0	1	0	1	0	XTH10	xyloglucan endotransglucosylase/hydrolase 10
AT2G15220	1	0	NA	NA	1	0	AT2G15220	Plant basic secretory protein (BSP) family protein
AT2G15390	1	0	NA	NA	3	2.87e-05	FUT4	fucosyltransferase 4
AT2G15760	1	0	NA	NA	5	0.00016459	AT2G15760	calmodulin-binding protein (DUF1645)
AT2G16280	1	0	NA	NA	6	0.00024263	KCS9	3-ketoacyl-CoA synthase 9
AT2G17720	1	0	1	0	24	0.00097639	P4H5	2-oxoglutarate (2OG) and Fe(II)-dependent oxygenase superfamily protein
AT2G17760	1	0	NA	NA	NA	NA	AT2G17760	Eukaryotic aspartyl protease family protein
AT2G18090	1	0	NA	NA	NA	NA	AT2G18090	PHD finger family protein / SWIB complex BAF60b domain-containing protein / GYF domain-containing protein
AT2G18690	1	0	3	0.00183284	2	1.4e-07	AT2G18690	transmembrane protein
AT2G19710	1	0	NA	NA	1	0	AT2G19710	Regulator of Vps4 activity in the MVB pathway protein
AT2G19880	1	0	NA	NA	3	4.65e-05	AT2G19880	Nucleotide-diphospho-sugar transferases superfamily protein
AT2G21120	1	0	NA	NA	6	0.00015384	AT2G21120	magnesium transporter, putative (DUF803)
AT2G21520	1	0	1	0	19	0.00073467	AT2G21520	Sec14p-like phosphatidylinositol transfer family protein
AT2G22330	1	0	NA	NA	NA	NA	CYP79B3	cytochrome P450, family 79, subfamily B, polypeptide 3
AT2G22470	1	0	NA	NA	8	0.00011531	AGP2	arabinogalactan protein 2
AT2G22620	1	0	NA	NA	NA	NA	AT2G22620	Rhamnogalacturonate lyase family protein
AT2G22860	1	0	NA	NA	NA	NA	PSK2	phytosulfokine 2 precursor
AT2G23260	1	0	NA	NA	1	0	UGT84B1	UDP-glucosyl transferase 84B1
AT2G23450	1	0	NA	NA	6	0.00024353	AT2G23450	Protein kinase superfamily protein
AT2G23810	1	0	1	0	21	0.00069969	TET8	tetraspanin8
AT2G24570	1	0	1	0	1	0	WRKY17	WRKY DNA-binding protein 17
AT2G25460	1	0	NA	NA	3	6.49e-05	AT2G25460	EEIG1/EHBP1 protein amino-terminal domain protein
AT2G26530	1	0	NA	NA	6	0.00023247	AR781	AR781, pheromone receptor-like protein (DUF1645)
AT2G27390	1	0	1	0	22	0.00123695	AT2G27390	proline-rich family protein
AT2G27500	1	0	NA	NA	8	0.00024604	AT2G27500	Glycosyl hydrolase superfamily protein
AT2G29350	1	0	NA	NA	4	7.6e-05	SAG13	senescence-associated gene 13
AT2G29470	1	0	NA	NA	1	0	GSTU3	glutathione S-transferase tau 3
AT2G30140	1	0	NA	NA	3	1.75e-05	UGT87A2	UDP-Glycosyltransferase superfamily protein
AT2G30395	1	0	NA	NA	4	5.73e-05	OFP17	ovate family protein 17
AT2G31570	1	0	NA	NA	NA	NA	GPX2	glutathione peroxidase 2
AT2G31945	1	0	NA	NA	7	0.00034013	AT2G31945	transmembrane protein
AT2G32210	1	0	3	0.0007596	7	9.1e-05	AT2G32210	cysteine-rich/transmembrane domain A-like protein
AT2G32235	1	0	NA	NA	1	0	AT2G32235	hypothetical protein
AT2G32960	1	0	NA	NA	NA	NA	PFA-DSP2	Phosphotyrosine protein phosphatases superfamily protein
AT2G33120	1	0	2	0.00088441	16	0.00058655	SAR1	synaptobrevin-related protein 1
AT2G33580	1	0	1	0	5	4.26e-05	LYK5	Protein kinase superfamily protein
AT2G33710	1	0	NA	NA	9	0.00047262	AT2G33710	Integrase-type DNA-binding superfamily protein
AT2G34630	1	0	NA	NA	1	0	GPS1	geranyl diphosphate synthase 1
AT2G35710	1	0	NA	NA	NA	NA	PGSIP7	Nucleotide-diphospho-sugar transferases superfamily protein
AT2G35730	1	0	NA	NA	4	4.12e-05	AT2G35730	Heavy metal transport/detoxification superfamily protein
AT2G36580	1	0	NA	NA	4	0.00011125	AT2G36580	Pyruvate kinase family protein
AT2G36630	1	0	8	0.0101628	15	0.00034269	AT2G36630	Sulfite exporter TauE/SafE family protein
AT2G36950	1	0	NA	NA	9	0.00045166	AT2G36950	Heavy metal transport/detoxification superfamily protein
AT2G37110	1	0	1	0	17	0.00072795	AT2G37110	PLAC8 family protein
AT2G37970	1	0	NA	NA	5	9.99e-05	SOUL-1	SOUL heme-binding family protein
AT2G38240	1	0	NA	NA	3	3.49e-05	AT2G38240	2-oxoglutarate (2OG) and Fe(II)-dependent oxygenase superfamily protein
AT2G38360	1	0	NA	NA	7	0.00026756	PRA1.B4	prenylated RAB acceptor 1.B4
AT2G38610	1	0	NA	NA	6	0.00021367	AT2G38610	RNA-binding KH domain-containing protein
AT2G38740	1	0	NA	NA	6	0.00028134	AT2G38740	Haloacid dehalogenase-like hydrolase (HAD) superfamily protein
AT2G39650	1	0	NA	NA	6	0.00029106	AT2G39650	cruciferin (DUF506)
AT2G41110	1	0	1	0	13	0.00062024	CAM2	calmodulin 2
AT2G41180	1	0	NA	NA	NA	NA	SIB2	VQ motif-containing protein
AT2G41380	1	0	1	0	22	0.00173854	AT2G41380	S-adenosyl-L-methionine-dependent methyltransferases superfamily protein
AT2G41640	1	0	NA	NA	NA	NA	AT2G41640	Glycosyltransferase family 61 protein
AT2G42350	1	0	NA	NA	NA	NA	AT2G42350	RING/U-box superfamily protein
AT2G43320	1	0	NA	NA	5	0.00020844	AT2G43320	S-adenosyl-L-methionine-dependent methyltransferases superfamily protein
AT2G43570	1	0	NA	NA	2	1.84e-05	CHI	chitinase
AT2G44970	1	0	NA	NA	NA	NA	AT2G44970	alpha/beta-Hydrolases superfamily protein
AT2G45070	1	0	NA	NA	2	1.84e-05	SEC61 BETA	Preprotein translocase Sec, Sec61-beta subunit protein
AT2G45290	1	0	NA	NA	5	0.0001608	AT2G45290	Transketolase
AT2G46170	1	0	NA	NA	3	5.31e-05	AT2G46170	Reticulon family protein
AT2G46320	1	0	NA	NA	6	0.00020274	AT2G46320	Mitochondrial substrate carrier family protein
AT2G46330	1	0	NA	NA	1	0	AGP16	arabinogalactan protein 16
AT2G47550	1	0	NA	NA	5	6.25e-05	AT2G47550	Plant invertase/pectin methylesterase inhibitor superfamily
AT2G47800	1	0	3	0.00113572	17	0.0007189	ABCC4	multidrug resistance-associated protein 4
AT3G01040	1	0	NA	NA	10	0.00046913	GAUT13	galacturonosyltransferase 13
AT3G01420	1	0	NA	NA	4	5.78e-05	DOX1	Peroxidase superfamily protein
AT3G01930	1	0	NA	NA	4	5.29e-05	AT3G01930	Major facilitator superfamily protein
AT3G01990	1	0	NA	NA	2	6.1e-07	ACR6	ACT domain repeat 6
AT3G02360	1	0	NA	NA	12	0.0007682	AT3G02360	6-phosphogluconate dehydrogenase family protein
AT3G05200	1	0	NA	NA	4	0.00010065	ATL6	RING/U-box superfamily protein
AT3G05350	1	0	NA	NA	1	0	AT3G05350	Metallopeptidase M24 family protein
AT3G05390	1	0	NA	NA	2	4.01e-06	AT3G05390	S-adenosyl-L-methionine-dependent methyltransferase
AT3G05580	1	0	NA	NA	1	0	TOPP9	Calcineurin-like metallo-phosphoesterase superfamily protein
AT3G07780	1	0	NA	NA	NA	NA	OBE1	potyvirus VPg interacting protein (DUF1423)
AT3G08630	1	0	NA	NA	4	9.4e-05	AT3G08630	alphavirus core family protein (DUF3411)
AT3G08710	1	0	NA	NA	1	0	TH9	thioredoxin H-type 9
AT3G08950	1	0	NA	NA	1	0	HCC1	electron transport SCO1/SenC family protein
AT3G09010	1	0	2	0.00046147	17	0.00050158	AT3G09010	Protein kinase superfamily protein
AT3G09405	1	0	NA	NA	3	2.48e-05	AT3G09405	Pectinacetylesterase family protein
AT3G10380	1	0	NA	NA	10	0.00056673	SEC8	subunit of exocyst complex 8
AT3G10500	1	0	2	0.00089617	18	0.00090651	NAC053	NAC domain containing protein 53
AT3G10640	1	0	NA	NA	8	0.0004142	VPS60.1	SNF7 family protein
AT3G10980	1	0	NA	NA	5	0.0001608	AT3G10980	PLAC8 family protein
AT3G10985	1	0	NA	NA	10	0.00066322	SAG20	senescence associated gene 20
AT3G11130	1	0	NA	NA	9	0.0004327	AT3G11130	Clathrin, heavy chain
AT3G11840	1	0	NA	NA	1	0	PUB24	E3 ubiquitin-protein ligase PUB24-like protein
AT3G12145	1	0	NA	NA	NA	NA	FLR1	Leucine-rich repeat (LRR) family protein
AT3G13100	1	0	NA	NA	NA	NA	ABCC7	multidrug resistance-associated protein 7
AT3G13380	1	0	1	0	12	0.00049757	BRL3	BRI1-like 3
AT3G13430	1	0	NA	NA	1	0	AT3G13430	RING/U-box superfamily protein
AT3G13950	1	0	2	0.00048213	17	0.00063879	AT3G13950	ankyrin
AT3G15352	1	0	NA	NA	2	2.31e-06	COX17	cytochrome c oxidase 17
AT3G15356	1	0	NA	NA	5	0.0001314	AT3G15356	Legume lectin family protein
AT3G15518	1	0	NA	NA	NA	NA	AT3G15518	hypothetical protein
AT3G16270	1	0	NA	NA	6	0.00033249	AT3G16270	ENTH/VHS family protein
AT3G16330	1	0	NA	NA	6	0.00013481	AT3G16330	Avr9/Cf-9 rapidly elicited protein
AT3G19615	1	0	1	0	1	0	AT3G19615	beta-1,4-xylosidase
AT3G19830	1	0	NA	NA	NA	NA	NTMC2T5.2	Calcium-dependent lipid-binding (CaLB domain) family protein
AT3G20510	1	0	1	0	5	4.34e-06	AT3G20510	Transmembrane proteins 14C
AT3G21140	1	0	NA	NA	3	1.63e-05	AT3G21140	Pyridoxamine 5'-phosphate oxidase family protein
AT3G23230	1	0	NA	NA	NA	NA	TDR1	Integrase-type DNA-binding superfamily protein
AT3G23530	1	0	4	0.00296265	6	4.84e-06	AT3G23530	Cyclopropane-fatty-acyl-phospholipid synthase
AT3G23570	1	0	NA	NA	8	0.00029731	AT3G23570	alpha/beta-Hydrolases superfamily protein
AT3G25780	1	0	NA	NA	1	0	AOC3	allene oxide cyclase 3
AT3G26090	1	0	1	0	NA	NA	RGS1	REGULATOR OF G-PROTEIN SIGNALING 1
AT3G26440	1	0	NA	NA	NA	NA	AT3G26440	transmembrane protein, putative (DUF707)
AT3G27330	1	0	NA	NA	8	0.00038422	AT3G27330	zinc finger (C3HC4-type RING finger) family protein
AT3G28210	1	0	1	0	24	0.00205023	PMZ	zinc finger (AN1-like) family protein
AT3G29034	1	0	NA	NA	4	0.00010558	AT3G29034	transmembrane protein
AT3G32090	1	0	1	0	1	0	AT3G32090	WRKY family transcription factor
AT3G46658	1	0	NA	NA	7	0.00022421	AT3G46658	Natural antisense transcript overlaps with AT3G46660
AT3G46660	1	0	NA	NA	2	1.19e-05	UGT76E12	UDP-glucosyl transferase 76E12
AT3G47540	1	0	1	0	7	8.11e-05	AT3G47540	Chitinase family protein
AT3G47550	1	0	NA	NA	NA	NA	AT3G47550	RING/FYVE/PHD zinc finger superfamily protein
AT3G48760	1	0	NA	NA	3	4.81e-05	AT3G48760	DHHC-type zinc finger family protein
AT3G48850	1	0	2	0.00046147	10	0.00018565	PHT3;2	phosphate transporter 3;2
AT3G49120	1	0	NA	NA	5	0.00013987	PRXCB	peroxidase CB
AT3G49530	1	0	NA	NA	4	7.11e-05	NAC062	NAC domain containing protein 62
AT3G49630	1	0	NA	NA	5	0.00020844	AT3G49630	2-oxoglutarate (2OG) and Fe(II)-dependent oxygenase superfamily protein
AT3G50310	1	0	NA	NA	NA	NA	MAPKKK20	mitogen-activated protein kinase kinase kinase 20
AT3G50550	1	0	NA	NA	5	0.00014363	AT3G50550	hypothetical protein
AT3G50770	1	0	NA	NA	3	1.63e-05	CML41	calmodulin-like 41
AT3G50900	1	0	NA	NA	7	0.00025259	AT3G50900	hypothetical protein
AT3G50910	1	0	NA	NA	14	0.00091554	AT3G50910	netrin receptor DCC
AT3G52520	1	0	NA	NA	2	1.29e-05	AT3G52520	hypothetical protein
AT3G52930	1	0	1	0	16	0.00082257	FBA8	Aldolase superfamily protein
AT3G56340	1	0	NA	NA	2	1.19e-05	AT3G56340	Ribosomal protein S26e family protein
AT3G57280	1	0	NA	NA	3	5.03e-05	AT3G57280	Transmembrane proteins 14C
AT3G57530	1	0	NA	NA	1	0	CPK32	calcium-dependent protein kinase 32
AT3G58510	1	0	NA	NA	NA	NA	AT3G58510	DEA(D/H)-box RNA helicase family protein
AT3G59350	1	0	NA	NA	5	0.00013305	AT3G59350	Protein kinase superfamily protein
AT3G59410	1	0	NA	NA	3	1.63e-05	GCN2	protein kinase family protein
AT3G60120	1	0	NA	NA	3	4.05e-05	BGLU27	beta glucosidase 27
AT3G60130	1	0	NA	NA	7	0.00026173	BGLU16	beta glucosidase 16
AT3G60140	1	0	NA	NA	7	0.00017624	DIN2	Glycosyl hydrolase superfamily protein
AT3G60260	1	0	NA	NA	2	8.82e-06	AT3G60260	ELMO/CED-12 family protein
AT3G60540	1	0	NA	NA	1	0	AT3G60540	Preprotein translocase Sec, Sec61-beta subunit protein
AT3G66654	1	0	NA	NA	10	0.00070343	AT3G66654	Cyclophilin-like peptidyl-prolyl cis-trans isomerase family protein
AT4G01360	1	0	5	0.00362206	8	0.00010851	BPS3	BPS1-like protein
AT4G01895	1	0	NA	NA	7	0.00023623	AT4G01895	systemic acquired resistance (SAR) regulator protein NIMIN-1-like protein
AT4G03420	1	0	NA	NA	NA	NA	AT4G03420	hypothetical protein (DUF789)
AT4G04800	1	0	NA	NA	1	0	MSRB3	methionine sulfoxide reductase B3
AT4G08180	1	0	NA	NA	12	0.00070687	ORP1C	OSBP(oxysterol binding protein)-related protein 1C
AT4G11170	1	0	NA	NA	11	0.00060332	AT4G11170	Disease resistance protein (TIR-NBS-LRR class) family
AT4G11370	1	0	NA	NA	NA	NA	RHA1A	RING-H2 finger A1A
AT4G11380	1	0	NA	NA	5	0.0001523	AT4G11380	Adaptin family protein
AT4G14450	1	0	7	0.00819508	2	2e-07	AT4G14450	hypothetical protein
AT4G14680	1	0	NA	NA	NA	NA	APS3	Pseudouridine synthase/archaeosine transglycosylase-like family protein
AT4G14950	1	0	NA	NA	3	4.98e-05	KMS1	SNARE associated Golgi protein family
AT4G15470	1	0	NA	NA	1	0	AT4G15470	Bax inhibitor-1 family protein
AT4G15610	1	0	NA	NA	NA	NA	AT4G15610	Uncharacterized protein family (UPF0497)
AT4G16760	1	0	1	0	22	0.00131632	ACX1	acyl-CoA oxidase 1
AT4G17070	1	0	NA	NA	4	0.00012668	AT4G17070	peptidyl-prolyl cis-trans isomerase
AT4G17486	1	0	NA	NA	6	0.00023568	AT4G17486	PPPDE putative thiol peptidase family protein
AT4G17720	1	0	5	0.00506202	17	0.00044798	AT4G17720	RNA-binding (RRM/RBD/RNP motifs) family protein
AT4G18170	1	0	NA	NA	NA	NA	WRKY28	WRKY DNA-binding protein 28
AT4G18360	1	0	NA	NA	4	7.3e-05	GOX3	Aldolase-type TIM barrel family protein
AT4G18990	1	0	1	0	21	0.00096976	XTH29	xyloglucan endotransglucosylase/hydrolase 29
AT4G19112	1	0	NA	NA	1	0
AT4G19370	1	0	NA	NA	5	8.14e-05	AT4G19370	chitin synthase, putative (DUF1218)
AT4G20780	1	0	NA	NA	1	0	CML42	calmodulin like 42
AT4G24110	1	0	NA	NA	3	1.63e-05	AT4G24110	NADP-specific glutamate dehydrogenase
AT4G24160	1	0	1	0	10	0.00019739	AT4G24160	alpha/beta-Hydrolases superfamily protein
AT4G25070	1	0	NA	NA	NA	NA	AT4G25070	caldesmon-like protein
AT4G25390	1	0	1	0	17	0.00037052	AT4G25390	Protein kinase superfamily protein
AT4G25720	1	0	NA	NA	5	0.0001471	QC	glutaminyl cyclase
AT4G26060	1	0	1	0	1	0	AT4G26060	Ribosomal protein L18ae family
AT4G26990	1	0	NA	NA	1	0	AT4G26990	polyadenylate-binding protein interacting protein
AT4G28085	1	0	NA	NA	1	0	AT4G28085	transmembrane protein
AT4G28490	1	0	NA	NA	NA	NA	HAE	Leucine-rich receptor-like protein kinase family protein
AT4G28940	1	0	NA	NA	9	0.000392	AT4G28940	Phosphorylase superfamily protein
AT4G29700	1	0	NA	NA	NA	NA	AT4G29700	Alkaline-phosphatase-like family protein
AT4G30060	1	0	NA	NA	NA	NA	AT4G30060	Core-2/I-branching beta-1,6-N-acetylglucosaminyltransferase family protein
AT4G30210	1	0	NA	NA	2	2.17e-05	ATR2	P450 reductase 2
AT4G30230	1	0	1	0	9	8.7e-05	AT4G30230	hypothetical protein
AT4G30260	1	0	NA	NA	1	0	AT4G30260	Integral membrane Yip1 family protein
AT4G30340	1	0	NA	NA	2	8.82e-06	DGK7	diacylglycerol kinase 7
AT4G30390	1	0	NA	NA	8	0.00022022	AT4G30390	UDP-arabinopyranose mutase
AT4G30780	1	0	NA	NA	7	7.85e-05	AT4G30780	ATP-dependent DNA helicase
AT4G31340	1	0	NA	NA	3	4.98e-05	AT4G31340	myosin heavy chain-like protein
AT4G33540	1	0	9	0.0160543	26	0.00121706	AT4G33540	metallo-beta-lactamase family protein
AT4G33910	1	0	NA	NA	NA	NA	AT4G33910	2-oxoglutarate (2OG) and Fe(II)-dependent oxygenase superfamily protein
AT4G34120	1	0	NA	NA	6	0.00022547	LEJ1	Cystathionine beta-synthase (CBS) family protein
AT4G34180	1	0	NA	NA	4	0.0001298	AT4G34180	Cyclase family protein
AT4G34200	1	0	NA	NA	8	0.00023661	EDA9	D-3-phosphoglycerate dehydrogenase
AT4G34210	1	0	NA	NA	3	4.18e-05	SK11	SKP1-like 11
AT4G34588	1	0	NA	NA	5	0.00020658
AT4G34590	1	0	NA	NA	9	0.00058103	GBF6	G-box binding factor 6
AT4G35260	1	0	1	0	12	0.00040591	IDH1	isocitrate dehydrogenase 1
AT4G35640	1	0	NA	NA	NA	NA	SERAT3;2	serine acetyltransferase 3;2
AT4G36988	1	0	1	0	14	0.00030137
AT4G37290	1	0	NA	NA	NA	NA	AT4G37290	transmembrane protein
AT4G37390	1	0	1	0	9	0.00013894	BRU6	Auxin-responsive GH3 family protein
AT4G37640	1	0	NA	NA	NA	NA	ACA2	calcium ATPase 2
AT4G37990	1	0	NA	NA	4	7.6e-05	ELI3-2	cinnamyl alcohol dehydrogenase 8
AT4G38540	1	0	1	0	14	0.00017151	AT4G38540	FAD/NAD(P)-binding oxidoreductase family protein
AT4G39780	1	0	NA	NA	3	1.75e-05	AT4G39780	Integrase-type DNA-binding superfamily protein
AT5G01100	1	0	11	0.0104045	18	0.00117614	FRB1	O-fucosyltransferase family protein
AT5G01830	1	0	NA	NA	4	5.73e-05	SAUR21	ARM repeat superfamily protein
AT5G02100	1	0	NA	NA	5	0.00014363	UNE18	Oxysterol-binding family protein
AT5G03290	1	0	5	0.00375204	32	0.00246801	IDH-V	isocitrate dehydrogenase V
AT5G03490	1	0	NA	NA	1	0	AT5G03490	UDP-Glycosyltransferase superfamily protein
AT5G04170	1	0	NA	NA	5	0.00014363	AT5G04170	Calcium-binding EF-hand family protein
AT5G04540	1	0	NA	NA	10	0.00037303	MTM2	Myotubularin-like phosphatases II superfamily
AT5G06230	1	0	NA	NA	4	0.00010664	TBL9	TRICHOME BIREFRINGENCE-LIKE 9
AT5G06740	1	0	NA	NA	NA	NA	AT5G06740	Concanavalin A-like lectin protein kinase family protein
AT5G06860	1	0	NA	NA	NA	NA	PGIP1	polygalacturonase inhibiting protein 1
AT5G06865	1	0	1	0	NA	NA	AT5G06865	Natural antisense transcript overlaps with AT5G06860
AT5G07350	1	0	NA	NA	8	0.00036737	Tudor1	TUDOR-SN protein 1
AT5G11520	1	0	NA	NA	9	0.00032808	ASP3	aspartate aminotransferase 3
AT5G13080	1	0	NA	NA	NA	NA	WRKY75	WRKY DNA-binding protein 75
AT5G13370	1	0	NA	NA	9	0.00054285	AT5G13370	Auxin-responsive GH3 family protein
AT5G13760	1	0	NA	NA	1	0	AT5G13760	Plasma-membrane choline transporter family protein
AT5G14310	1	0	1	0	11	0.00039877	CXE16	carboxyesterase 16
AT5G14730	1	0	NA	NA	7	0.00012839	AT5G14730	hypothetical protein
AT5G14760	1	0	NA	NA	NA	NA	AO	L-aspartate oxidase
AT5G15470	1	0	NA	NA	3	4.65e-05	GAUT14	galacturonosyltransferase 14
AT5G16970	1	0	NA	NA	5	0.00010768	AER	alkenal reductase
AT5G17380	1	0	NA	NA	11	0.00063451	AT5G17380	Thiamine pyrophosphate dependent pyruvate decarboxylase family protein
AT5G18070	1	0	NA	NA	NA	NA	DRT101	phosphoglucosamine mutase-like protein
AT5G18470	1	0	NA	NA	NA	NA	AT5G18470	Curculin-like (mannose-binding) lectin family protein
AT5G20000	1	0	NA	NA	10	0.00049117	AT5G20000	AAA-type ATPase family protein
AT5G22350	1	0	2	0.00161383	18	0.00168672	ELM1	fission ELM1-like protein (DUF1022)
AT5G23510	1	0	NA	NA	NA	NA	AT5G23510	hypothetical protein
AT5G25930	1	0	2	0.00046147	12	0.00015418	AT5G25930	kinase family with leucine-rich repeat domain-containing protein
AT5G26680	1	0	NA	NA	NA	NA	AT5G26680	5'-3' exonuclease family protein
AT5G27600	1	0	2	0.00089617	21	0.00067174	LACS7	long-chain acyl-CoA synthetase 7
AT5G27760	1	0	1	0	14	0.00039135	AT5G27760	Hypoxia-responsive family protein
AT5G29000	1	0	NA	NA	1	0	PHL1	Homeodomain-like superfamily protein
AT5G33320	1	0	NA	NA	7	0.00026977	CUE1	Glucose-6-phosphate/phosphate translocator-like protein
AT5G36880	1	0	1	0	14	0.00029905	ACS	acetyl-CoA synthetase
AT5G37840	1	0	NA	NA	6	0.00017912	AT5G37840	plastid movement impaired protein
AT5G38530	1	0	1	0	9	0.00013793	TSBtype2	tryptophan synthase beta type 2
AT5G39040	1	0	2	0.00088441	NA	NA	ABCB27	transporter associated with antigen processing protein 2
AT5G40170	1	0	NA	NA	NA	NA	RLP54	receptor like protein 54
AT5G41100	1	0	NA	NA	1	0	AT5G41100	hydroxyproline-rich glycoprotein family protein
AT5G41750	1	0	1	0	7	6.08e-05	AT5G41750	Disease resistance protein (TIR-NBS-LRR class) family
AT5G41992	1	0	NA	NA	8	0.00037594
AT5G42150	1	0	NA	NA	2	2.35e-06	AT5G42150	Glutathione S-transferase family protein
AT5G42930	1	0	NA	NA	1	0	AT5G42930	alpha/beta-Hydrolases superfamily protein
AT5G43410	1	0	NA	NA	3	2.62e-05	AT5G43410	Integrase-type DNA-binding superfamily protein
AT5G44060	1	0	NA	NA	1	0	AT5G44060	embryo sac development arrest protein
AT5G47200	1	0	4	0.0009231	22	0.00122497	RAB1A	RAB GTPase homolog 1A
AT5G47910	1	0	NA	NA	4	8.77e-05	RBOHD	respiratory burst oxidase homologue D
AT5G48530	1	0	NA	NA	2	4.01e-06	AT5G48530	hypothetical protein
AT5G49280	1	0	NA	NA	NA	NA	AT5G49280	hydroxyproline-rich glycoprotein family protein
AT5G49665	1	0	NA	NA	7	0.00017624	AT5G49665	Zinc finger (C3HC4-type RING finger) family protein
AT5G50370	1	0	NA	NA	1	0	AT5G50370	Adenylate kinase family protein
AT5G51070	1	0	NA	NA	12	0.00086578	ERD1	Clp ATPase
AT5G53560	1	0	NA	NA	7	0.0002501	CB5-E	cytochrome B5 isoform E
AT5G54300	1	0	NA	NA	4	5.73e-05	AT5G54300	cotton fiber-like protein (DUF761)
AT5G54500	1	0	3	0.00113572	16	0.00055925	FQR1	flavodoxin-like quinone reductase 1
AT5G54590	1	0	NA	NA	NA	NA	CRLK1	Protein kinase superfamily protein
AT5G54860	1	0	2	0.00161383	7	0.00030094	AT5G54860	Major facilitator superfamily protein
AT5G55120	1	0	NA	NA	NA	NA	VTC5	GDP-L-galactose phosphorylase VITAMIN C DEFECTIVE 5 (VTC5)
AT5G55560	1	0	1	0	20	0.00083989	AT5G55560	Protein kinase superfamily protein
AT5G57035	1	0	NA	NA	NA	NA	AT5G57035	U-box domain-containing protein kinase family protein
AT5G57060	1	0	NA	NA	3	3.74e-05	AT5G57060	60S ribosomal L18a-like protein
AT5G57490	1	0	NA	NA	9	0.00047526	VDAC4	voltage dependent anion channel 4
AT5G58290	1	0	NA	NA	11	0.00058027	RPT3	regulatory particle triple-A ATPase 3
AT5G58375	1	0	NA	NA	4	8.13e-05	AT5G58375	Methyltransferase-related protein
AT5G58680	1	0	NA	NA	NA	NA	AT5G58680	ARM repeat superfamily protein
AT5G59160	1	0	NA	NA	3	6.09e-05	TOPP2	type one serine/threonine protein phosphatase 2
AT5G59420	1	0	NA	NA	5	0.00014112	ORP3C	OSBP(oxysterol binding protein)-related protein 3C
AT5G59490	1	0	NA	NA	1	0	AT5G59490	Haloacid dehalogenase-like hydrolase (HAD) superfamily protein
AT5G59820	1	0	3	0.0007596	13	0.00028691	RHL41	C2H2-type zinc finger family protein
AT5G60300	1	0	NA	NA	NA	NA	LecRK-I.9	Concanavalin A-like lectin protein kinase family protein
AT5G61210	1	0	1	0	13	0.0003223	SNAP33	soluble N-ethylmaleimide-sensitive factor adaptor protein 33
AT5G63160	1	0	NA	NA	NA	NA	BT1	BTB and TAZ domain protein 1
AT5G63970	1	0	NA	NA	11	0.00043393	RGLG3	Copine (Calcium-dependent phospholipid-binding protein) family
AT5G64750	1	0	NA	NA	2	1.37e-05	ABR1	Integrase-type DNA-binding superfamily protein
AT5G65890	1	0	NA	NA	4	1.96e-05	ACR1	ACT domain repeat 1
AT5G66320	1	0	NA	NA	4	7.11e-05	GATA5	GATA transcription factor 5
AT5G66650	1	0	NA	NA	1	0	AT5G66650	calcium uniporter (DUF607)
AT5G67080	1	0	NA	NA	7	0.00037233	MAPKKK19	mitogen-activated protein kinase kinase kinase 19
Bcin01g04580.2	1	0	2	1.36e-05	562	0.100446	hypothetical protein BofuT4_P163510.1	no GO terms
Bcin07g03430.1	1	0	NA	NA	NA	NA	glutathione s- [Botrytis cinerea 1]	F:protein binding
Bcin08g01720.1	1	0	NA	NA	NA	NA	predicted protein	no GO terms
Bcin09g02540.1	1	0	NA	NA	NA	NA	mfs multidrug transporter	P:transmembrane transport; C:membrane; C:integral component of membrane
Bcin10g02070.1	1	0	NA	NA	NA	NA	hypothetical protein BC1G_14801	F:hydrolase activity; F:carboxy-lyase activity
Bcin10g05710.1	1	0	NA	NA	NA	NA	glycoside hydrolase family 32 [Botrytis cinerea T4]	P:carbohydrate metabolic process; F:hydrolase activity, acting on glycosyl bonds
Bcin12g06120.1	1	0	NA	NA	NA	NA	hypothetical protein BofuT4_P068250.1 [Botrytis cinerea T4]	no GO terms
Bcin13g00560.1	1	0	NA	NA	NA	NA		no GO terms
Bcin14g00210.1	1	0	NA	NA	NA	NA	nadh oxidase [Botrytis cinerea 1]	F:FMN binding; F:oxidoreductase activity; F:catalytic activity; P:oxidation-reduction process
Bcin15g02650.1	1	0	NA	NA	NA	NA	peroxisomal NADH pyrophosphatase NUDT12 [Botrytis cinerea T4]	F:metal ion binding; F:hydrolase activity
AT1G01490	NA	NA	NA	NA	3	4e-05	AT1G01490	Heavy metal transport/detoxification superfamily protein
AT1G01550	NA	NA	NA	NA	2	1.84e-05	BPS1	BPS1-like protein (DUF793)
AT1G01910	NA	NA	NA	NA	1	0	AT1G01910	P-loop containing nucleoside triphosphate hydrolases superfamily protein
AT1G02360	NA	NA	1	0	1	0	AT1G02360	Chitinase family protein
AT1G02460	NA	NA	NA	NA	1	0	AT1G02460	Pectin lyase-like superfamily protein
AT1G02880	NA	NA	NA	NA	1	0	TPK1	thiamin pyrophosphokinase1
AT1G02920	NA	NA	3	0.00297147	7	0.00040384	GSTF7	glutathione S-transferase 7
AT1G02930	NA	NA	2	0.00046147	1	0	GSTF6	glutathione S-transferase 6
AT1G03220	NA	NA	NA	NA	12	0.00075874	AT1G03220	Eukaryotic aspartyl protease family protein
AT1G03250	NA	NA	NA	NA	1	0	AT1G03250	R3H domain protein
AT1G03370	NA	NA	NA	NA	1	0	AT1G03370	C2 calcium/lipid-binding and GRAM domain containing protein
AT1G03740	NA	NA	NA	NA	1	0	AT1G03740	Protein kinase superfamily protein
AT1G03850	NA	NA	NA	NA	1	0	GRXS13	Glutaredoxin family protein
AT1G04100	NA	NA	NA	NA	3	1.63e-05	IAA10	indoleacetic acid-induced protein 10
AT1G04750	NA	NA	NA	NA	1	0	VAMP721	vesicle-associated membrane protein 721
AT1G04960	NA	NA	NA	NA	2	1.19e-05	AT1G04960	golgin family A protein (DUF1664)
AT1G04970	NA	NA	NA	NA	1	0	AT1G04970	lipid-binding serum glycoprotein family protein
AT1G04980	NA	NA	NA	NA	5	0.0001454	PDIL2-2	PDI-like 2-2
AT1G05010	NA	NA	1	0	4	8.05e-05	EFE	ethylene-forming enzyme
AT1G05575	NA	NA	NA	NA	6	0.00017652	AT1G05575	transmembrane protein
AT1G05620	NA	NA	NA	NA	2	1.19e-05	URH2	uridine-ribohydrolase 2
AT1G05680	NA	NA	NA	NA	2	4.01e-06	UGT74E2	Uridine diphosphate glycosyltransferase 74E2
AT1G06290	NA	NA	NA	NA	1	0	ACX3	acyl-CoA oxidase 3
AT1G06800	NA	NA	NA	NA	1	0	PLA-I{gamma}1	alpha/beta-Hydrolases superfamily protein
AT1G06870	NA	NA	NA	NA	1	0	Plsp2A	Peptidase S24/S26A/S26B/S26C family protein
AT1G07000	NA	NA	2	0.00161383	1	0	EXO70B2	exocyst subunit exo70 family protein B2
AT1G07130	NA	NA	NA	NA	2	1.35e-05	STN1	Nucleic acid-binding, OB-fold-like protein
AT1G07140	NA	NA	NA	NA	8	0.00046442	SIRANBP	Pleckstrin homology (PH) domain superfamily protein
AT1G07630	NA	NA	NA	NA	8	0.0001785	PLL5	pol-like 5
AT1G07810	NA	NA	NA	NA	1	0	ECA1	ER-type Ca2 -ATPase 1
AT1G08050	NA	NA	3	0.00287375	NA	NA	AT1G08050	Zinc finger (C3HC4-type RING finger) family protein
AT1G08830	NA	NA	NA	NA	1	0	CSD1	copper/zinc superoxide dismutase 1
AT1G09070	NA	NA	1	0	8	0.00044732	SRC2	soybean gene regulated by cold-2
AT1G09330	NA	NA	NA	NA	1	0	AT1G09330	golgi apparatus membrane protein-like protein ECHIDNA protein
AT1G09480	NA	NA	NA	NA	4	0.00012751	AT1G09480	NAD(P)-binding Rossmann-fold superfamily protein
AT1G09500	NA	NA	NA	NA	1	0	AT1G09500	NAD(P)-binding Rossmann-fold superfamily protein
AT1G09575	NA	NA	NA	NA	4	7.11e-05	AT1G09575	calcium uniporter-like protein (DUF607)
AT1G09630	NA	NA	NA	NA	1	0	RAB11c	RAB GTPase 11C
AT1G09815	NA	NA	NA	NA	2	2.1e-05	POLD4	polymerase delta 4
AT1G10580	NA	NA	NA	NA	5	8.17e-05	AT1G10580	Transducin/WD40 repeat-like superfamily protein
AT1G10630	NA	NA	NA	NA	1	0	ARFA1F	ADP-ribosylation factor A1F
AT1G11650	NA	NA	NA	NA	2	2.47e-05	RBP45B	RNA-binding (RRM/RBD/RNP motifs) family protein
AT1G11905	NA	NA	NA	NA	1	0	AT1G11905	B-cell receptor-associated protein 31-like protein
AT1G13020	NA	NA	1	0	NA	NA	EIF4B2	eukaryotic initiation factor 4B2
AT1G14000	NA	NA	NA	NA	3	4.18e-05	VIK	VH1-interacting kinase
AT1G14060	NA	NA	NA	NA	1	0	AT1G14060	GCK domain-containing protein
AT1G14320	NA	NA	NA	NA	1	0	SAC52	Ribosomal protein L16p/L10e family protein
AT1G14360	NA	NA	NA	NA	1	0	UTR3	UDP-galactose transporter 3
AT1G14370	NA	NA	NA	NA	5	2.65e-05	APK2A	protein kinase 2A
AT1G14830	NA	NA	NA	NA	2	2.1e-05	DL1C	DYNAMIN-like 1C
AT1G14880	NA	NA	1	0	NA	NA	PCR1	PLANT CADMIUM RESISTANCE 1
AT1G15120	NA	NA	NA	NA	3	3.42e-05	AT1G15120	Ubiquinol-cytochrome C reductase hinge protein
AT1G15125	NA	NA	NA	NA	1	0	AT1G15125	S-adenosyl-L-methionine-dependent methyltransferases superfamily protein
AT1G15130	NA	NA	NA	NA	1	0	AT1G15130	Endosomal targeting BRO1-like domain-containing protein
AT1G15370	NA	NA	NA	NA	1	0	AT1G15370	SNARE-like superfamily protein
AT1G15415	NA	NA	NA	NA	2	7.27e-06	AT1G15415	late embryogenesis abundant-like protein
AT1G15670	NA	NA	NA	NA	1	0	AT1G15670	Galactose oxidase/kelch repeat superfamily protein
AT1G16180	NA	NA	NA	NA	4	0.00010446	AT1G16180	Serinc-domain containing serine and sphingolipid biosynthesis protein
AT1G16300	NA	NA	1	0	5	0.00012719	GAPCP-2	glyceraldehyde-3-phosphate dehydrogenase of plastid 2
AT1G16420	NA	NA	NA	NA	1	0	MC8	metacaspase 8
AT1G16540	NA	NA	NA	NA	4	8.28e-05	ABA3	molybdenum cofactor sulfurase (LOS5) (ABA3)
AT1G17180	NA	NA	NA	NA	3	3.34e-05	GSTU25	glutathione S-transferase TAU 25
AT1G17330	NA	NA	NA	NA	1	0	AT1G17330	Metal-dependent phosphohydrolase
AT1G17720	NA	NA	NA	NA	1	0	ATB BETA	Protein phosphatase 2A, regulatory subunit PR55
AT1G17745	NA	NA	NA	NA	9	0.00058103	PGDH	D-3-phosphoglycerate dehydrogenase
AT1G18390	NA	NA	1	0	NA	NA	AT1G18390	Serine/Threonine kinase family catalytic domain protein
AT1G18480	NA	NA	NA	NA	7	0.00034187	SLP2	Calcineurin-like metallo-phosphoesterase superfamily protein
AT1G18540	NA	NA	NA	NA	1	0	AT1G18540	Ribosomal protein L6 family protein
AT1G18590	NA	NA	NA	NA	5	0.00012721	SOT17	sulfotransferase 17
AT1G18740	NA	NA	NA	NA	2	1.84e-05	AT1G18740	ROH1, putative (DUF793)
AT1G18890	NA	NA	1	0	4	0.0001043	CDPK1	calcium-dependent protein kinase 1
AT1G19360	NA	NA	NA	NA	5	0.00018658	RRA3	Nucleotide-diphospho-sugar transferase family protein
AT1G20110	NA	NA	NA	NA	1	0	AT1G20110	RING/FYVE/PHD zinc finger superfamily protein
AT1G20630	NA	NA	NA	NA	1	0	CAT1	catalase 1
AT1G20780	NA	NA	5	0.00407958	NA	NA	SAUL1	senescence-associated E3 ubiquitin ligase 1
AT1G20970	NA	NA	NA	NA	7	0.00014953	AT1G20970	calponin-like domain protein
AT1G21245	NA	NA	1	0	NA	NA	AT1G21245	Protein kinase superfamily protein
AT1G21370	NA	NA	2	0.00161383	NA	NA	AT1G21370	transmembrane protein
AT1G21450	NA	NA	4	0.00376174	2	1.23e-06	SCL1	SCARECROW-like 1
AT1G21900	NA	NA	NA	NA	6	0.00028134	p24delta5	emp24/gp25L/p24 family/GOLD family protein
AT1G22020	NA	NA	NA	NA	4	5.73e-05	SHM6	serine hydroxymethyltransferase 6
AT1G22110	NA	NA	NA	NA	2	8.82e-06	AT1G22110	structural constituent of ribosome
AT1G22280	NA	NA	NA	NA	2	8.82e-06	PAPP2C	phytochrome-associated protein phosphatase type 2C
AT1G22300	NA	NA	NA	NA	5	0.00012719	GRF10	general regulatory factor 10
AT1G22340	NA	NA	NA	NA	4	3.73e-05	UGT85A7	UDP-glucosyl transferase 85A7
AT1G22360	NA	NA	NA	NA	1	0	UGT85A2	UDP-glucosyl transferase 85A2
AT1G22840	NA	NA	NA	NA	5	0.00019758	CYTC-1	CYTOCHROME C-1
AT1G22882	NA	NA	NA	NA	1	0	AT1G22882	Galactose-binding protein
AT1G22890	NA	NA	2	0.00161383	NA	NA	AT1G22890	transmembrane protein
AT1G23090	NA	NA	NA	NA	7	0.0003903	AST91	sulfate transporter 91
AT1G23440	NA	NA	NA	NA	6	0.00023277	AT1G23440	Peptidase C15, pyroglutamyl peptidase I-like protein
AT1G23490	NA	NA	NA	NA	3	3.42e-05	ARF1	ADP-ribosylation factor 1
AT1G24100	NA	NA	NA	NA	1	0	UGT74B1	UDP-glucosyl transferase 74B1
AT1G24360	NA	NA	NA	NA	1	0	AT1G24360	NAD(P)-binding Rossmann-fold superfamily protein
AT1G26910	NA	NA	NA	NA	1	0	RPL10B	Ribosomal protein L16p/L10e family protein
AT1G27000	NA	NA	NA	NA	5	0.00019758	AT1G27000	GRIP/coiled-coil protein, putative (DUF1664)
AT1G27330	NA	NA	NA	NA	1	0	AT1G27330	Ribosome associated membrane protein RAMP4
AT1G27350	NA	NA	NA	NA	6	0.00021182	AT1G27350	Ribosome associated membrane protein RAMP4
AT1G27390	NA	NA	NA	NA	2	1.98e-05	TOM20-2	translocase outer membrane 20-2
AT1G27720	NA	NA	NA	NA	1	0	TAF4B	TBP-associated factor 4B
AT1G27970	NA	NA	NA	NA	1	0	NTF2B	nuclear transport factor 2B
AT1G28190	NA	NA	1	0	5	5.97e-05	AT1G28190	hypothetical protein
AT1G29120	NA	NA	NA	NA	1	0	AT1G29120	Hydrolase-like protein family
AT1G29230	NA	NA	NA	NA	1	0	CIPK18	CBL-interacting protein kinase 18
AT1G29300	NA	NA	NA	NA	6	0.00024263	UNE1	intracellular protein transporter, putative (DUF641)
AT1G29310	NA	NA	NA	NA	6	0.00029499	AT1G29310	SecY protein transport family protein
AT1G30320	NA	NA	1	0	NA	NA	AT1G30320	Remorin family protein
AT1G30370	NA	NA	NA	NA	1	0	DLAH	alpha/beta-Hydrolases superfamily protein
AT1G30400	NA	NA	NA	NA	4	7.08e-05	ABCC1	multidrug resistance-associated protein 1
AT1G30630	NA	NA	NA	NA	3	4.98e-05	AT1G30630	Coatomer epsilon subunit
AT1G32120	NA	NA	NA	NA	1	0	AT1G32120	serine/threonine-protein phosphatase 7 long form-like protein
AT1G32170	NA	NA	NA	NA	3	4.18e-05	XTH30	xyloglucan endotransglucosylase/hydrolase 30
AT1G32230	NA	NA	1	0	NA	NA	RCD1	WWE protein-protein interaction domain protein family
AT1G32380	NA	NA	NA	NA	4	0.00010103	PRS2	phosphoribosyl pyrophosphate (PRPP) synthase 2
AT1G32530	NA	NA	NA	NA	4	5.73e-05	AT1G32530	RING/U-box superfamily protein
AT1G32920	NA	NA	1	0	2	1.22e-05	AT1G32920	hypothetical protein
AT1G32928	NA	NA	NA	NA	1	0	AT1G32928	Avr9/Cf-9 rapidly elicited protein
AT1G32950	NA	NA	1	0	5	0.00016889	AT1G32950	Subtilase family protein
AT1G33960	NA	NA	2	0.00037551	NA	NA	AIG1	P-loop containing nucleoside triphosphate hydrolases superfamily protein
AT1G34370	NA	NA	NA	NA	6	0.00010584	STOP1	C2H2 and C2HC zinc fingers superfamily protein
AT1G35160	NA	NA	NA	NA	1	0	GF14 PHI	GF14 protein phi chain
AT1G35230	NA	NA	NA	NA	4	5.73e-05	AGP5	arabinogalactan protein 5
AT1G35350	NA	NA	NA	NA	2	1.77e-05	AT1G35350	EXS (ERD1/XPR1/SYG1) family protein
AT1G35580	NA	NA	1	0	1	0	CINV1	cytosolic invertase 1
AT1G36050	NA	NA	NA	NA	1	0	AT1G36050	Endoplasmic reticulum vesicle transporter protein
AT1G37130	NA	NA	NA	NA	7	0.00033853	NIA2	nitrate reductase 2
AT1G43310	NA	NA	1	0	NA	NA	AT1G43310	Nucleotide-sugar transporter family protein
AT1G44130	NA	NA	1	0	3	4.11e-05	AT1G44130	Eukaryotic aspartyl protease family protein
AT1G45145	NA	NA	NA	NA	1	0	TRX5	thioredoxin H-type 5
AT1G48210	NA	NA	2	0.00037551	NA	NA	AT1G48210	Protein kinase superfamily protein
AT1G48370	NA	NA	NA	NA	3	4.76e-05	YSL8	YELLOW STRIPE like 8
AT1G48490	NA	NA	NA	NA	1	0	AT1G48490	Protein kinase superfamily protein
AT1G48860	NA	NA	NA	NA	1	0	AT1G48860	RNA 3'-terminal phosphate cyclase/enolpyruvate transferase, alpha/beta
AT1G50740	NA	NA	1	0	4	0.00011449	AT1G50740	Transmembrane proteins 14C
AT1G50750	NA	NA	NA	NA	2	8.82e-06	AT1G50750	aminotransferase-like, mobile domain protein
AT1G51350	NA	NA	NA	NA	1	0	AT1G51350	ARM repeat superfamily protein
AT1G51790	NA	NA	1	0	NA	NA	AT1G51790	Leucine-rich repeat protein kinase family protein
AT1G51800	NA	NA	2	0.00161383	1	0	IOS1	Leucine-rich repeat protein kinase family protein
AT1G51890	NA	NA	3	0.00287375	NA	NA	AT1G51890	Leucine-rich repeat protein kinase family protein
AT1G51920	NA	NA	3	0.00287375	NA	NA	AT1G51920	transmembrane protein
AT1G51980	NA	NA	NA	NA	4	0.00011125	AT1G51980	Insulinase (Peptidase family M16) protein
AT1G52200	NA	NA	1	0	2	5.76e-06	AT1G52200	PLAC8 family protein
AT1G52760	NA	NA	NA	NA	1	0	LysoPL2	lysophospholipase 2
AT1G53625	NA	NA	2	0.00037551	3	2.63e-05	AT1G53625	hypothetical protein
AT1G53750	NA	NA	NA	NA	8	0.00036524	RPT1A	regulatory particle triple-A 1A
AT1G53760	NA	NA	NA	NA	1	0	AT1G53760	K -H exchange-like protein
AT1G54030	NA	NA	NA	NA	4	9.52e-05	MVP1	GDSL-like Lipase/Acylhydrolase superfamily protein
AT1G54270	NA	NA	NA	NA	4	0.00010779	EIF4A-2	eif4a-2
AT1G54320	NA	NA	1	0	2	4.78e-06	AT1G54320	LEM3 (ligand-effect modulator 3) family protein / CDC50 family protein
AT1G54710	NA	NA	NA	NA	1	0	ATG18H	autophagy 18h-like protein
AT1G54990	NA	NA	NA	NA	2	1.48e-05	AXR4	alpha/beta-Hydrolases superfamily protein
AT1G55080	NA	NA	NA	NA	1	0	MED9	mediator of RNA polymerase II transcription subunit-like protein
AT1G55500	NA	NA	1	0	1	0	ECT4	evolutionarily conserved C-terminal region 4
AT1G55920	NA	NA	NA	NA	9	0.00040489	SERAT2;1	serine acetyltransferase 2;1
AT1G56070	NA	NA	NA	NA	1	0	LOS1	Ribosomal protein S5/Elongation factor G/III/V family protein
AT1G56330	NA	NA	NA	NA	4	9.89e-05	SAR1B	secretion-associated RAS 1B
AT1G56340	NA	NA	NA	NA	4	8.72e-05	CRT1a	calreticulin 1a
AT1G56480	NA	NA	NA	NA	1	0	AT1G56480	pseudogene of Pectin lyase-like superfamily protein
AT1G57650	NA	NA	NA	NA	7	0.00024056	AT1G57650	ATP binding protein
AT1G57680	NA	NA	NA	NA	1	0	Cand1	plasminogen activator inhibitor
AT1G57990	NA	NA	NA	NA	1	0	PUP18	purine permease 18
AT1G58420	NA	NA	NA	NA	2	8.82e-06	AT1G58420	Uncharacterized conserved protein UCP031279
AT1G58684	NA	NA	NA	NA	2	1.19e-05	AT1G58684	Ribosomal protein S5 family protein
AT1G58983	NA	NA	NA	NA	1	0	AT1G58983	Ribosomal protein S5 family protein
AT1G59359	NA	NA	NA	NA	2	1.19e-05	AT1G59359	Ribosomal protein S5 family protein
AT1G59590	NA	NA	1	0	3	4.18e-05	ZCF37	ZCF37
AT1G59710	NA	NA	NA	NA	1	0	AT1G59710	actin cross-linking protein (DUF569)
AT1G60740	NA	NA	NA	NA	5	0.00019758	AT1G60740	Thioredoxin superfamily protein
AT1G61140	NA	NA	NA	NA	1	0	EDA16	SNF2 domain-containing protein / helicase domain-containing protein / zinc finger protein-like protein
AT1G61380	NA	NA	1	0	NA	NA	SD1-29	S-domain-1 29
AT1G61560	NA	NA	NA	NA	2	1.35e-05	MLO6	Seven transmembrane MLO family protein
AT1G61640	NA	NA	NA	NA	2	8.82e-06	AT1G61640	Protein kinase superfamily protein
AT1G61730	NA	NA	NA	NA	1	0	AT1G61730	DNA-binding storekeeper protein-related transcriptional regulator
AT1G61740	NA	NA	NA	NA	1	0	AT1G61740	Sulfite exporter TauE/SafE family protein
AT1G62045	NA	NA	NA	NA	1	0	AT1G62045	ankyrin repeat protein
AT1G62200	NA	NA	NA	NA	5	9e-05	PTR6	Major facilitator superfamily protein
AT1G62305	NA	NA	NA	NA	2	1.82e-05	AT1G62305	Core-2/I-branching beta-1,6-N-acetylglucosaminyltransferase family protein
AT1G62380	NA	NA	NA	NA	2	7.95e-06	ACO2	ACC oxidase 2
AT1G62740	NA	NA	NA	NA	2	1.98e-05	Hop2	stress-inducible protein
AT1G62790	NA	NA	NA	NA	9	0.00032808	AT1G62790	Bifunctional inhibitor/lipid-transfer protein/seed storage 2S albumin superfamily protein
AT1G63090	NA	NA	NA	NA	5	0.0001581	PP2-A11	phloem protein 2-A11
AT1G63220	NA	NA	NA	NA	7	0.00017624	AT1G63220	Calcium-dependent lipid-binding (CaLB domain) family protein
AT1G63440	NA	NA	NA	NA	2	1.32e-05	HMA5	heavy metal atpase 5
AT1G63830	NA	NA	NA	NA	1	0	AT1G63830	PLAC8 family protein
AT1G63840	NA	NA	NA	NA	1	0	AT1G63840	RING/U-box superfamily protein
AT1G64060	NA	NA	1	0	NA	NA	RBOH F	respiratory burst oxidase protein F
AT1G65520	NA	NA	NA	NA	10	0.0006644	ECI1	delta(3), delta(2)-enoyl CoA isomerase 1
AT1G65540	NA	NA	NA	NA	1	0	LETM2	LETM1-like protein
AT1G65820	NA	NA	NA	NA	5	0.00018564	AT1G65820	microsomal glutathione s-transferase
AT1G65930	NA	NA	NA	NA	3	4.18e-05	cICDH	cytosolic NADP -dependent isocitrate dehydrogenase
AT1G65970	NA	NA	1	0	1	0	TPX2	thioredoxin-dependent peroxidase 2
AT1G66070	NA	NA	NA	NA	4	8.78e-05	AT1G66070	Translation initiation factor eIF3 subunit
AT1G66160	NA	NA	3	0.00287375	1	0	CMPG1	CYS, MET, PRO, and GLY protein 1
AT1G66570	NA	NA	NA	NA	4	8.05e-05	SUC7	sucrose-proton symporter 7
AT1G66680	NA	NA	NA	NA	1	0	AR401	S-adenosyl-L-methionine-dependent methyltransferases superfamily protein
AT1G66880	NA	NA	1	0	NA	NA	AT1G66880	Protein kinase superfamily protein
AT1G67230	NA	NA	NA	NA	3	1.63e-05	LINC1	little nuclei1
AT1G67430	NA	NA	NA	NA	1	0	AT1G67430	Ribosomal protein L22p/L17e family protein
AT1G67680	NA	NA	NA	NA	4	9.46e-05	AT1G67680	SRP72 RNA-binding domain-containing protein
AT1G68410	NA	NA	1	0	8	0.00034626	AT1G68410	Protein phosphatase 2C family protein
AT1G69760	NA	NA	NA	NA	1	0	AT1G69760	suppressor SRP40-like protein
AT1G69870	NA	NA	NA	NA	2	7.41e-06	NRT1.7	nitrate transporter 1.7
AT1G70140	NA	NA	1	0	NA	NA	FH8	formin 8
AT1G70530	NA	NA	1	0	NA	NA	CRK3	cysteine-rich RLK (RECEPTOR-like protein kinase) 3
AT1G70770	NA	NA	NA	NA	4	0.0001298	AT1G70770	transmembrane protein (Protein of unknown function DUF2359, transmembrane)
AT1G70782	NA	NA	NA	NA	1	0
AT1G70810	NA	NA	NA	NA	5	0.00019758	AT1G70810	Calcium-dependent lipid-binding (CaLB domain) family protein
AT1G71100	NA	NA	NA	NA	9	0.00055082	RSW10	Ribose 5-phosphate isomerase, type A protein
AT1G71140	NA	NA	NA	NA	12	0.00066989	AT1G71140	MATE efflux family protein
AT1G71697	NA	NA	2	0.00161383	NA	NA	CK1	choline kinase 1
AT1G71820	NA	NA	NA	NA	7	0.0004364	SEC6	SEC6
AT1G72680	NA	NA	1	0	NA	NA	CAD1	cinnamyl-alcohol dehydrogenase
AT1G72750	NA	NA	NA	NA	2	2.71e-05	TIM23-2	translocase inner membrane subunit 23-2
AT1G72940	NA	NA	NA	NA	3	1.63e-05	AT1G72940	Toll-Interleukin-Resistance (TIR) domain-containing protein
AT1G73540	NA	NA	1	0	2	1.35e-05	NUDT21	nudix hydrolase homolog 21
AT1G74010	NA	NA	NA	NA	6	0.00013481	AT1G74010	Calcium-dependent phosphotriesterase superfamily protein
AT1G74080	NA	NA	1	0	3	1.81e-05	MYB122	myb domain protein 122
AT1G74100	NA	NA	NA	NA	2	8.82e-06	SOT16	sulfotransferase 16
AT1G74270	NA	NA	NA	NA	1	0	AT1G74270	Ribosomal protein L35Ae family protein
AT1G74330	NA	NA	2	0.00017238	3	1.8e-05	AT1G74330	Protein kinase superfamily protein
AT1G74340	NA	NA	NA	NA	8	0.00037594	DPMS2	dolichol phosphate-mannose biosynthesis regulatory protein-like protein
AT1G74450	NA	NA	NA	NA	2	2.71e-05	AT1G74450	BPS1-like protein (DUF793)
AT1G74640	NA	NA	2	0.00014661	6	0.00024263	AT1G74640	alpha/beta-Hydrolases superfamily protein
AT1G75000	NA	NA	NA	NA	5	0.00012719	AT1G75000	GNS1/SUR4 membrane protein family
AT1G75270	NA	NA	NA	NA	3	2.62e-05	DHAR2	dehydroascorbate reductase 2
AT1G75450	NA	NA	NA	NA	1	0	CKX5	cytokinin oxidase 5
AT1G76040	NA	NA	1	0	NA	NA	CPK29	calcium-dependent protein kinase 29
AT1G76250	NA	NA	NA	NA	2	3.51e-06	AT1G76250	transmembrane protein
AT1G76390	NA	NA	NA	NA	2	1.19e-05	PUB43	ARM repeat superfamily protein
AT1G76490	NA	NA	NA	NA	1	0	HMG1	hydroxy methylglutaryl CoA reductase 1
AT1G76680	NA	NA	NA	NA	4	5.08e-05	OPR1	12-oxophytodienoate reductase 1
AT1G76700	NA	NA	NA	NA	2	1.84e-05	AT1G76700	DNAJ heat shock N-terminal domain-containing protein
AT1G77500	NA	NA	2	0.00017238	2	1.29e-05	AT1G77500	DUF630 family protein, putative (DUF630 and DUF632)
AT1G77510	NA	NA	1	0	2	1.19e-05	PDIL1-2	PDI-like 1-2
AT1G77660	NA	NA	2	0.00021673	1	0	AT1G77660	Histone H3 K4-specific methyltransferase SET7/9 family protein
AT1G77670	NA	NA	NA	NA	10	0.00035377	AT1G77670	Pyridoxal phosphate (PLP)-dependent transferases superfamily protein
AT1G77740	NA	NA	NA	NA	2	7.82e-06	PIP5K2	phosphatidylinositol-4-phosphate 5-kinase 2
AT1G77810	NA	NA	NA	NA	2	1.84e-05	AT1G77810	Galactosyltransferase family protein
AT1G77890	NA	NA	NA	NA	2	1.19e-05	AT1G77890	DNA-directed RNA polymerase II protein
AT1G78380	NA	NA	1	0	5	0.00012719	GSTU19	glutathione S-transferase TAU 19
AT1G78420	NA	NA	NA	NA	2	3.34e-05	AT1G78420	RING/U-box superfamily protein
AT1G79410	NA	NA	3	0.00297147	6	0.00024353	2017-10-05	organic cation/carnitine transporter5
AT1G79680	NA	NA	NA	NA	2	2.18e-05	WAKL10	WALL ASSOCIATED KINASE (WAK)-LIKE 10
AT1G79920	NA	NA	NA	NA	2	1.29e-05	Hsp70-15	Heat shock protein 70 (Hsp 70) family protein
AT1G79940	NA	NA	NA	NA	1	0	ATERDJ2A	DnaJ / Sec63 Brl domains-containing protein
AT1G80450	NA	NA	NA	NA	2	1.32e-05	AT1G80450	VQ motif-containing protein
AT1G80830	NA	NA	NA	NA	3	4.18e-05	NRAMP1	natural resistance-associated macrophage protein 1
AT1G80840	NA	NA	2	0.00046147	NA	NA	WRKY40	WRKY DNA-binding protein 40
AT2G01190	NA	NA	NA	NA	2	2.72e-06	PDE331	Octicosapeptide/Phox/Bem1p family protein
AT2G01600	NA	NA	NA	NA	8	0.00045153	AT2G01600	ENTH/ANTH/VHS superfamily protein
AT2G01650	NA	NA	1	0	NA	NA	PUX2	plant UBX domain-containing protein 2
AT2G01670	NA	NA	2	0.00161383	5	0.0001608	NUDT17	nudix hydrolase homolog 17
AT2G01850	NA	NA	NA	NA	2	2.47e-05	EXGT-A3	endoxyloglucan transferase A3
AT2G02010	NA	NA	5	0.004753	2	1.29e-05	GAD4	glutamate decarboxylase 4
AT2G02040	NA	NA	NA	NA	6	0.00029462	PTR2	peptide transporter 2
AT2G02220	NA	NA	2	0.00161383	NA	NA	PSKR1	phytosulfokin receptor 1
AT2G02370	NA	NA	1	0	2	8.82e-06	AT2G02370	SNARE associated Golgi protein family
AT2G02870	NA	NA	NA	NA	7	0.00026173	AT2G02870	Galactose oxidase/kelch repeat superfamily protein
AT2G03120	NA	NA	NA	NA	2	2.71e-05	SPP	signal peptide peptidase
AT2G03510	NA	NA	2	0.00037551	NA	NA	AT2G03510	SPFH/Band 7/PHB domain-containing membrane-associated protein family
AT2G04040	NA	NA	NA	NA	2	7.27e-06	DTX1	MATE efflux family protein
AT2G04305	NA	NA	NA	NA	7	0.00026747	AT2G04305	Magnesium transporter CorA-like family protein
AT2G04520	NA	NA	NA	NA	2	1.07e-05	AT2G04520	Nucleic acid-binding, OB-fold-like protein
AT2G05260	NA	NA	NA	NA	1	0	AT2G05260	alpha/beta-Hydrolases superfamily protein
AT2G06530	NA	NA	NA	NA	1	0	VPS2.1	SNF7 family protein
AT2G13790	NA	NA	1	0	NA	NA	SERK4	somatic embryogenesis receptor-like kinase 4
AT2G13800	NA	NA	1	0	NA	NA	SERK5	somatic embryogenesis receptor-like kinase 5
AT2G14661	NA	NA	NA	NA	2	5.76e-06	AT2G14661	pseudogene of MATE efflux family protein
AT2G16430	NA	NA	1	0	NA	NA	PAP10	purple acid phosphatase 10
AT2G16510	NA	NA	NA	NA	2	1.32e-05	AT2G16510	ATPase, F0/V0 complex, subunit C protein
AT2G16660	NA	NA	NA	NA	2	2.92e-05	AT2G16660	Major facilitator superfamily protein
AT2G16920	NA	NA	NA	NA	2	1.48e-05	UBC23	ubiquitin-conjugating enzyme 23
AT2G16950	NA	NA	NA	NA	2	1.19e-05	TRN1	transportin 1
AT2G17130	NA	NA	NA	NA	2	8.82e-06	IDH2	isocitrate dehydrogenase subunit 2
AT2G17220	NA	NA	3	0.00287375	4	9.89e-05	Kin3	Protein kinase superfamily protein
AT2G17290	NA	NA	NA	NA	2	8.82e-06	CPK6	Calcium-dependent protein kinase family protein
AT2G17420	NA	NA	NA	NA	11	0.00073829	NTRA	NADPH-dependent thioredoxin reductase A
AT2G17520	NA	NA	NA	NA	3	1.63e-05	IRE1A	Endoribonuclease/protein kinase IRE1-like protein
AT2G17530	NA	NA	NA	NA	1	0	AT2G17530	Protein kinase superfamily protein
AT2G17705	NA	NA	NA	NA	9	0.00039129	AT2G17705	methionine-S-oxide reductase
AT2G17730	NA	NA	NA	NA	2	1.19e-05	NIP2	NEP-interacting protein 2
AT2G17870	NA	NA	NA	NA	1	0	CSP3	cold shock domain protein 3
AT2G18660	NA	NA	1	0	NA	NA	PNP-A	plant natriuretic peptide A
AT2G18670	NA	NA	1	0	1	0	AT2G18670	RING/U-box superfamily protein
AT2G18680	NA	NA	1	0	1	0	AT2G18680	transmembrane protein
AT2G18860	NA	NA	NA	NA	1	0	AT2G18860	Syntaxin/t-SNARE family protein
AT2G19160	NA	NA	NA	NA	3	5.31e-05	AT2G19160	Core-2/I-branching beta-1,6-N-acetylglucosaminyltransferase family protein
AT2G19190	NA	NA	2	0.00037551	NA	NA	FRK1	FLG22-induced receptor-like kinase 1
AT2G19480	NA	NA	NA	NA	1	0	NAP1;2	nucleosome assembly protein 1;2
AT2G19730	NA	NA	NA	NA	1	0	AT2G19730	Ribosomal L28e protein family
AT2G20320	NA	NA	NA	NA	7	0.00023726	AT2G20320	DENN (AEX-3) domain-containing protein
AT2G20562	NA	NA	1	0	5	0.00011769	AT2G20562	taximin
AT2G20760	NA	NA	NA	NA	11	0.00066126	AT2G20760	Clathrin light chain protein
AT2G21190	NA	NA	NA	NA	9	0.000392	AT2G21190	ER lumen protein retaining receptor family protein
AT2G21390	NA	NA	NA	NA	1	0	AT2G21390	Coatomer, alpha subunit
AT2G21620	NA	NA	NA	NA	8	0.0003061	RD2	Adenine nucleotide alpha hydrolases-like superfamily protein
AT2G22475	NA	NA	NA	NA	3	4.65e-05	GEM	GRAM domain family protein
AT2G23420	NA	NA	1	0	NA	NA	NAPRT2	nicotinate phosphoribosyltransferase 2
AT2G23830	NA	NA	NA	NA	1	0	AT2G23830	PapD-like superfamily protein
AT2G24100	NA	NA	NA	NA	7	0.00023726	ASG1	ATP-dependent DNA helicase
AT2G24200	NA	NA	NA	NA	6	0.0001203	LAP1	Cytosol aminopeptidase family protein
AT2G24210	NA	NA	NA	NA	2	4.19e-06	TPS10	terpene synthase 10
AT2G24360	NA	NA	1	0	NA	NA	AT2G24360	Protein kinase superfamily protein
AT2G24500	NA	NA	NA	NA	9	0.00031245	FZF	Zinc finger protein 622
AT2G24640	NA	NA	NA	NA	1	0	UBP19	ubiquitin-specific protease 19
AT2G25110	NA	NA	NA	NA	7	0.00028207	SDF2	stromal cell-derived factor 2-like protein precursor
AT2G27510	NA	NA	NA	NA	10	0.00061215	FD3	ferredoxin 3
AT2G27600	NA	NA	NA	NA	1	0	SKD1	AAA-type ATPase family protein
AT2G28085	NA	NA	NA	NA	2	1.31e-06	AT2G28085	SAUR-like auxin-responsive protein family
AT2G28210	NA	NA	NA	NA	4	7.37e-05	ACA2	alpha carbonic anhydrase 2
AT2G29150	NA	NA	NA	NA	2	1.82e-05	AT2G29150	NAD(P)-binding Rossmann-fold superfamily protein
AT2G29410	NA	NA	NA	NA	4	4.12e-05	MTPB1	metal tolerance protein B1
AT2G29420	NA	NA	NA	NA	1	0	GSTU7	glutathione S-transferase tau 7
AT2G29460	NA	NA	1	0	NA	NA	GSTU4	glutathione S-transferase tau 4
AT2G29720	NA	NA	NA	NA	1	0	CTF2B	FAD/NAD(P)-binding oxidoreductase family protein
AT2G29940	NA	NA	NA	NA	3	5.86e-05	ABCG31	pleiotropic drug resistance 3
AT2G30010	NA	NA	NA	NA	5	0.00011855	TBL45	TRICHOME BIREFRINGENCE-LIKE 45
AT2G30040	NA	NA	NA	NA	2	1.22e-05	MAPKKK14	mitogen-activated protein kinase kinase kinase 14
AT2G30050	NA	NA	NA	NA	2	1.84e-05	AT2G30050	transducin family protein / WD-40 repeat family protein
AT2G30060	NA	NA	NA	NA	1	0	AT2G30060	Pleckstrin homology (PH) domain superfamily protein
AT2G30250	NA	NA	2	0.00144719	2	3.4e-05	WRKY25	WRKY DNA-binding protein 25
AT2G30550	NA	NA	1	0	3	5.03e-05	AT2G30550	alpha/beta-Hydrolases superfamily protein
AT2G30770	NA	NA	NA	NA	2	8.1e-06	CYP71A13	cytochrome P450 family 71 polypeptide
AT2G30990	NA	NA	NA	NA	10	0.00056391	AT2G30990	arginine N-methyltransferase, putative (DUF688)
AT2G31090	NA	NA	NA	NA	4	8.49e-05	AT2G31090	transmembrane protein
AT2G31260	NA	NA	NA	NA	1	0	APG9	autophagy 9 (APG9)
AT2G31390	NA	NA	NA	NA	8	0.00054068	AT2G31390	pfkB-like carbohydrate kinase family protein
AT2G31580	NA	NA	NA	NA	2	8.82e-06	AT2G31580	tRNAHis guanylyltransferase
AT2G32130	NA	NA	NA	NA	1	0	AT2G32130	intracellular protein transporter, putative (DUF641)
AT2G33040	NA	NA	NA	NA	1	0	ATP3	gamma subunit of Mt ATP synthase
AT2G33110	NA	NA	1	0	5	0.00016214	VAMP723	vesicle-associated membrane protein 723
AT2G33700	NA	NA	NA	NA	7	0.00035295	PP2CG1	Protein phosphatase 2C family protein
AT2G34080	NA	NA	NA	NA	5	0.0001523	AT2G34080	Cysteine proteinases superfamily protein
AT2G34355	NA	NA	NA	NA	5	0.00016543	AT2G34355	Major facilitator superfamily protein
AT2G34660	NA	NA	2	0.00036928	4	5.73e-05	ABCC2	multidrug resistance-associated protein 2
AT2G35736	NA	NA	NA	NA	1	0	AT2G35736	hypothetical protein
AT2G36530	NA	NA	NA	NA	4	0.00011125	LOS2	Enolase
AT2G36620	NA	NA	NA	NA	3	5.86e-05	RPL24A	ribosomal protein L24
AT2G36780	NA	NA	NA	NA	6	0.0002105	AT2G36780	UDP-Glycosyltransferase superfamily protein
AT2G36800	NA	NA	NA	NA	1	0	DOGT1	don-glucosyltransferase 1
AT2G37040	NA	NA	NA	NA	1	0	PAL1	PHE ammonia lyase 1
AT2G37150	NA	NA	NA	NA	6	0.00024263	AT2G37150	RING/U-box superfamily protein
AT2G37250	NA	NA	NA	NA	4	0.00011125	ADK	adenosine kinase
AT2G37430	NA	NA	1	0	1	0	ZAT11	C2H2 and C2HC zinc fingers superfamily protein
AT2G37550	NA	NA	NA	NA	3	3.79e-05	AGD7	ARF-GAP domain 7
AT2G37760	NA	NA	NA	NA	2	1.32e-05	AKR4C8	NAD(P)-linked oxidoreductase superfamily protein
AT2G37980	NA	NA	NA	NA	3	1.63e-05	AT2G37980	O-fucosyltransferase family protein
AT2G38290	NA	NA	1	0	NA	NA	AMT2	ammonium transporter 2
AT2G39200	NA	NA	2	0.00037551	NA	NA	MLO12	Seven transmembrane MLO family protein
AT2G39210	NA	NA	1	0	NA	NA	AT2G39210	Major facilitator superfamily protein
AT2G39518	NA	NA	4	0.00376174	6	6.65e-05	AT2G39518	Uncharacterized protein family (UPF0497)
AT2G39530	NA	NA	2	0.00037551	NA	NA	AT2G39530	Uncharacterized protein family (UPF0497)
AT2G39970	NA	NA	NA	NA	4	0.00011125	PXN	Mitochondrial substrate carrier family protein
AT2G40095	NA	NA	1	0	4	5.08e-05	AT2G40095	Alpha/beta hydrolase related protein
AT2G40730	NA	NA	NA	NA	2	1.19e-05	CTEXP	kinase family with ARM repeat domain-containing protein
AT2G40765	NA	NA	NA	NA	2	1.19e-05	AT2G40765	transmembrane protein
AT2G40820	NA	NA	NA	NA	2	4.01e-06	AT2G40820	stomatal closure actin-binding-like protein
AT2G41410	NA	NA	NA	NA	5	0.00014085	AT2G41410	Calcium-binding EF-hand family protein
AT2G41420	NA	NA	NA	NA	3	6.53e-05	WIH2	proline-rich family protein
AT2G41835	NA	NA	2	0.00161383	3	5.03e-05	AT2G41835	zinc finger (C2H2 type, AN1-like) family protein
AT2G42010	NA	NA	NA	NA	5	2.73e-05	PLDBETA1	phospholipase D beta 1
AT2G42680	NA	NA	NA	NA	2	2.71e-05	MBF1A	multiprotein bridging factor 1A
AT2G42990	NA	NA	NA	NA	1	0	AT2G42990	GDSL-like Lipase/Acylhydrolase superfamily protein
AT2G43290	NA	NA	NA	NA	2	1.48e-05	MSS3	Calcium-binding EF-hand family protein
AT2G43490	NA	NA	NA	NA	5	0.0001523	AT2G43490	Ypt/Rab-GAP domain of gyp1p superfamily protein
AT2G43620	NA	NA	3	0.00073607	NA	NA	AT2G43620	Chitinase family protein
AT2G43760	NA	NA	NA	NA	1	0	AT2G43760	molybdopterin biosynthesis MoaE family protein
AT2G43820	NA	NA	4	0.00214616	1	0	UGT74F2	UDP-glucosyltransferase 74F2
AT2G43870	NA	NA	NA	NA	1	0	AT2G43870	Pectin lyase-like superfamily protein
AT2G44080	NA	NA	NA	NA	3	1.75e-05	ARL	ARGOS-like protein
AT2G44280	NA	NA	1	0	NA	NA	AT2G44280	Major facilitator superfamily protein
AT2G44350	NA	NA	NA	NA	7	0.00025445	ATCS	Citrate synthase family protein
AT2G44500	NA	NA	NA	NA	4	0.00011652	AT2G44500	O-fucosyltransferase family protein
AT2G44520	NA	NA	NA	NA	3	4.76e-05	COX10	cytochrome c oxidase 10
AT2G45440	NA	NA	NA	NA	2	2.18e-05	DHDPS2	dihydrodipicolinate synthase
AT2G46080	NA	NA	NA	NA	5	0.00019758	BPS2	BPS1-like protein
AT2G46400	NA	NA	1	0	2	4.01e-06	WRKY46	WRKY DNA-binding protein 46
AT2G46500	NA	NA	NA	NA	6	0.00029462	PI4K GAMMA 4	phosphoinositide 4-kinase gamma 4
AT2G47130	NA	NA	1	0	NA	NA	SDR3	NAD(P)-binding Rossmann-fold superfamily protein
AT2G47170	NA	NA	NA	NA	3	4.65e-05	ARF1A1C	Ras-related small GTP-binding family protein
AT2G47190	NA	NA	NA	NA	2	1.82e-05	MYB2	myb domain protein 2
AT2G47470	NA	NA	NA	NA	2	1.19e-05	UNE5	thioredoxin family protein
AT2G47520	NA	NA	NA	NA	1	0	ERF71	Integrase-type DNA-binding superfamily protein
AT2G47610	NA	NA	NA	NA	6	0.00029499	AT2G47610	Ribosomal protein L7Ae/L30e/S12e/Gadd45 family protein
AT2G47730	NA	NA	1	0	NA	NA	GSTF8	glutathione S-transferase phi 8
AT2G47950	NA	NA	NA	NA	8	0.00015721	AT2G47950	myelin transcription factor-like protein
AT3G01120	NA	NA	NA	NA	3	2.33e-05	MTO1	Pyridoxal phosphate (PLP)-dependent transferases superfamily protein
AT3G01280	NA	NA	NA	NA	11	0.00068813	VDAC1	voltage dependent anion channel 1
AT3G01290	NA	NA	NA	NA	1	0	HIR2	SPFH/Band 7/PHB domain-containing membrane-associated protein family
AT3G01540	NA	NA	NA	NA	6	0.00021766	DRH1	DEAD box RNA helicase 1
AT3G01640	NA	NA	NA	NA	4	9.52e-05	GLCAK	glucuronokinase G
AT3G01720	NA	NA	NA	NA	1	0	AT3G01720	peptidyl serine alpha-galactosyltransferase
AT3G01830	NA	NA	1	0	NA	NA	AT3G01830	Calcium-binding EF-hand family protein
AT3G01970	NA	NA	NA	NA	9	0.00030077	WRKY45	WRKY DNA-binding protein 45
AT3G01980	NA	NA	NA	NA	6	9.65e-05	AT3G01980	NAD(P)-binding Rossmann-fold superfamily protein
AT3G02090	NA	NA	NA	NA	5	0.00019758	MPPBETA	Insulinase (Peptidase family M16) protein
AT3G02150	NA	NA	NA	NA	1	0	PTF1	plastid transcription factor 1
AT3G02240	NA	NA	NA	NA	4	5.73e-05	RGF7	root meristem growth factor-like protein
AT3G02468	NA	NA	NA	NA	1	0
AT3G02470	NA	NA	NA	NA	2	1.77e-05	SAMDC	S-adenosylmethionine decarboxylase
AT3G02550	NA	NA	NA	NA	2	4.01e-06	LBD41	LOB domain-containing protein 41
AT3G02560	NA	NA	NA	NA	2	2.71e-05	AT3G02560	Ribosomal protein S7e family protein
AT3G02740	NA	NA	NA	NA	2	2.71e-05	AT3G02740	Eukaryotic aspartyl protease family protein
AT3G02880	NA	NA	NA	NA	4	0.00012735	AT3G02880	Leucine-rich repeat protein kinase family protein
AT3G03160	NA	NA	NA	NA	3	4.33e-05	AT3G03160	B-cell receptor-associated-like protein
AT3G03440	NA	NA	1	0	7	0.00011975	AT3G03440	ARM repeat superfamily protein
AT3G03610	NA	NA	NA	NA	1	0	AT3G03610	ELMO/CED-12 family protein
AT3G04000	NA	NA	NA	NA	2	7.95e-06	AT3G04000	NAD(P)-binding Rossmann-fold superfamily protein
AT3G04080	NA	NA	NA	NA	1	0	APY1	apyrase 1
AT3G04120	NA	NA	NA	NA	3	4.76e-05	GAPC1	glyceraldehyde-3-phosphate dehydrogenase C subunit 1
AT3G04210	NA	NA	NA	NA	2	8.82e-06	AT3G04210	Disease resistance protein (TIR-NBS class)
AT3G04640	NA	NA	1	0	5	0.00020274	AT3G04640	glycine-rich protein
AT3G04670	NA	NA	2	0.00037551	1	0	WRKY39	WRKY DNA-binding protein 39
AT3G04720	NA	NA	NA	NA	1	0	PR4	pathogenesis-related 4
AT3G04840	NA	NA	NA	NA	1	0	AT3G04840	Ribosomal protein S3Ae
AT3G05050	NA	NA	1	0	7	0.00037233	AT3G05050	Protein kinase superfamily protein
AT3G05500	NA	NA	3	0.00287375	3	5.14e-05	AT3G05500	Rubber elongation factor protein (REF)
AT3G06250	NA	NA	NA	NA	1	0	FRS7	FAR1-related sequence 7
AT3G06350	NA	NA	NA	NA	10	0.00056391	MEE32	dehydroquinate dehydratase, putative / shikimate dehydrogenase
AT3G06420	NA	NA	NA	NA	1	0	ATG8H	Ubiquitin-like superfamily protein
AT3G07090	NA	NA	NA	NA	5	0.00011702	AT3G07090	PPPDE putative thiol peptidase family protein
AT3G07195	NA	NA	1	0	NA	NA	AT3G07195	RPM1-interacting protein 4 (RIN4) family protein
AT3G07370	NA	NA	NA	NA	3	4.18e-05	CHIP	carboxyl terminus of HSC70-interacting protein
AT3G07390	NA	NA	2	0.00161383	6	0.00029462	AIR12	auxin-induced in root cultures-like protein
AT3G07680	NA	NA	NA	NA	1	0	p24beta2	emp24/gp25L/p24 family/GOLD family protein
AT3G07890	NA	NA	NA	NA	1	0	AT3G07890	Ypt/Rab-GAP domain of gyp1p superfamily protein
AT3G07970	NA	NA	NA	NA	2	1.48e-05	QRT2	Pectin lyase-like superfamily protein
AT3G08530	NA	NA	NA	NA	2	1.84e-06	AT3G08530	Clathrin, heavy chain
AT3G08640	NA	NA	NA	NA	6	0.00025973	AT3G08640	alphavirus core family protein (DUF3411)
AT3G08780	NA	NA	NA	NA	1	0	AT3G08780	BRISC complex subunit Abro1-like protein
AT3G09440	NA	NA	NA	NA	2	1.29e-05	AT3G09440	Heat shock protein 70 (Hsp 70) family protein
AT3G09630	NA	NA	NA	NA	3	5.14e-05	AT3G09630	Ribosomal protein L4/L1 family
AT3G09810	NA	NA	NA	NA	3	4.98e-05	IDH-VI	isocitrate dehydrogenase VI
AT3G10050	NA	NA	NA	NA	1	0	OMR1	L-O-methylthreonine resistant 1
AT3G10320	NA	NA	NA	NA	1	0	AT3G10320	Glycosyltransferase family 61 protein
AT3G10370	NA	NA	NA	NA	3	4.98e-05	SDP6	FAD-dependent oxidoreductase family protein
AT3G10490	NA	NA	NA	NA	1	0	NAC052	NAC domain containing protein 52
AT3G10800	NA	NA	NA	NA	1	0	BZIP28	Basic-leucine zipper (bZIP) transcription factor family protein
AT3G10915	NA	NA	NA	NA	3	1.63e-05	AT3G10915	Reticulon family protein
AT3G11150	NA	NA	NA	NA	1	0	AT3G11150	2-oxoglutarate (2OG) and Fe(II)-dependent oxygenase superfamily protein
AT3G11200	NA	NA	NA	NA	3	5.55e-05	AL2	alfin-like 2
AT3G11330	NA	NA	NA	NA	5	0.00017855	PIRL9	plant intracellular ras group-related LRR 9
AT3G11340	NA	NA	5	0.00554515	2	1.48e-05	UGT76B1	UDP-Glycosyltransferase superfamily protein
AT3G12400	NA	NA	NA	NA	5	0.0001846	ELC	Ubiquitin-conjugating enzyme/RWD-like protein
AT3G12502	NA	NA	NA	NA	1	0	AT3G12502	Natural antisense transcript overlaps with AT3G12500
AT3G12600	NA	NA	NA	NA	2	1.41e-05	NUDT16	nudix hydrolase homolog 16
AT3G12620	NA	NA	NA	NA	1	0	AT3G12620	Protein phosphatase 2C family protein
AT3G13070	NA	NA	NA	NA	7	0.00019446	AT3G13070	CBS domain-containing protein / transporter associated domain-containing protein
AT3G13080	NA	NA	2	0.00037551	NA	NA	ABCC3	multidrug resistance-associated protein 3
AT3G13310	NA	NA	NA	NA	4	5.73e-05	AT3G13310	Chaperone DnaJ-domain superfamily protein
AT3G13330	NA	NA	1	0	NA	NA	PA200	proteasome activating protein 200
AT3G13600	NA	NA	3	0.00214403	NA	NA	AT3G13600	calmodulin-binding family protein
AT3G13610	NA	NA	3	0.00287375	1	0	AT3G13610	2-oxoglutarate (2OG) and Fe(II)-dependent oxygenase superfamily protein
AT3G13730	NA	NA	NA	NA	1	0	CYP90D1	cytochrome P450, family 90, subfamily D, polypeptide 1
AT3G13790	NA	NA	3	0.00287375	1	0	ATBFRUCT1	Glycosyl hydrolases family 32 protein
AT3G13910	NA	NA	NA	NA	1	0	AT3G13910	hypothetical protein (DUF3511)
AT3G13930	NA	NA	NA	NA	1	0	AT3G13930	Dihydrolipoamide acetyltransferase, long form protein
AT3G14090	NA	NA	NA	NA	4	0.0001043	EXO70D3	exocyst subunit exo70 family protein D3
AT3G14620	NA	NA	1	0	1	0	CYP72A8	cytochrome P450, family 72, subfamily A, polypeptide 8
AT3G14770	NA	NA	NA	NA	2	1.43e-05	SWEET2	Nodulin MtN3 family protein
AT3G14850	NA	NA	NA	NA	3	4.98e-05	TBL41	TRICHOME BIREFRINGENCE-LIKE 41
AT3G14990	NA	NA	1	0	5	0.00012719	DJ1A	Class I glutamine amidotransferase-like superfamily protein
AT3G15010	NA	NA	NA	NA	2	1.84e-06	AT3G15010	RNA-binding (RRM/RBD/RNP motifs) family protein
AT3G15060	NA	NA	NA	NA	1	0	RABA1g	RAB GTPase homolog A1G
AT3G15430	NA	NA	1	0	NA	NA	AT3G15430	Regulator of chromosome condensation (RCC1) family protein
AT3G15640	NA	NA	NA	NA	2	1.19e-05	AT3G15640	Rubredoxin-like superfamily protein
AT3G15980	NA	NA	NA	NA	1	0	AT3G15980	Coatomer, beta' subunit
AT3G16220	NA	NA	NA	NA	2	3.4e-05	AT3G16220	Putative eukaryotic LigT
AT3G16760	NA	NA	NA	NA	1	0	AT3G16760	Tetratricopeptide repeat (TPR)-like superfamily protein
AT3G16785	NA	NA	2	0.00037551	NA	NA	PLDP1	phospholipase D P1
AT3G17410	NA	NA	1	0	2	8.82e-06	AT3G17410	Protein kinase superfamily protein
AT3G17420	NA	NA	NA	NA	3	1.18e-05	GPK1	glyoxysomal protein kinase 1
AT3G17780	NA	NA	NA	NA	3	5.86e-05	AT3G17780	B-cell receptor-associated-like protein
AT3G18290	NA	NA	NA	NA	3	4.18e-05	BTS	zinc finger protein-like protein
AT3G18560	NA	NA	NA	NA	2	1.48e-05	AT3G18560	hypothetical protein
AT3G19130	NA	NA	NA	NA	3	7.14e-05	RBP47B	RNA-binding protein 47B
AT3G19660	NA	NA	NA	NA	2	8.82e-06	AT3G19660	hypothetical protein
AT3G20800	NA	NA	NA	NA	1	0	AT3G20800	Cell differentiation, Rcd1-like protein
AT3G20860	NA	NA	3	0.00297147	1	0	NEK5	Serine/Threonine kinase catalytic domain protein
AT3G21560	NA	NA	NA	NA	5	0.00012719	UGT84A2	UDP-Glycosyltransferase superfamily protein
AT3G21630	NA	NA	NA	NA	1	0	CERK1	chitin elicitor receptor kinase 1
AT3G21690	NA	NA	NA	NA	10	0.00057742	AT3G21690	MATE efflux family protein
AT3G22160	NA	NA	NA	NA	3	2.86e-05	AT3G22160	VQ motif-containing protein
AT3G22200	NA	NA	NA	NA	1	0	POP2	Pyridoxal phosphate (PLP)-dependent transferases superfamily protein
AT3G22890	NA	NA	NA	NA	4	4.12e-05	APS1	ATP sulfurylase 1
AT3G22950	NA	NA	NA	NA	6	0.00024263	ARFC1	ADP-ribosylation factor C1
AT3G23250	NA	NA	6	0.00628727	3	1.63e-05	MYB15	myb domain protein 15
AT3G23560	NA	NA	NA	NA	2	3.51e-06	ALF5	MATE efflux family protein
AT3G23580	NA	NA	NA	NA	1	0	RNR2A	ribonucleotide reductase 2A
AT3G24170	NA	NA	NA	NA	8	0.00046442	GR1	glutathione-disulfide reductase
AT3G24503	NA	NA	NA	NA	5	0.00018195	ALDH2C4	aldehyde dehydrogenase 2C4
AT3G25230	NA	NA	NA	NA	1	0	ROF1	rotamase FKBP 1
AT3G25800	NA	NA	NA	NA	1	0	PP2AA2	protein phosphatase 2A subunit A2
AT3G26020	NA	NA	NA	NA	10	0.00055914	AT3G26020	Protein phosphatase 2A regulatory B subunit family protein
AT3G26680	NA	NA	NA	NA	2	4.01e-06	SNM1	DNA repair metallo-beta-lactamase family protein
AT3G26780	NA	NA	NA	NA	10	0.00037711	MEF14	Phosphoglycerate mutase family protein
AT3G26820	NA	NA	NA	NA	4	5.73e-05	AT3G26820	Esterase/lipase/thioesterase family protein
AT3G26830	NA	NA	2	0.00046147	1	0	PAD3	Cytochrome P450 superfamily protein
AT3G27380	NA	NA	NA	NA	7	0.00025445	SDH2-1	succinate dehydrogenase 2-1
AT3G27890	NA	NA	1	0	NA	NA	NQR	NADPH:quinone oxidoreductase
AT3G28850	NA	NA	NA	NA	3	4.13e-05	AT3G28850	Glutaredoxin family protein
AT3G42050	NA	NA	NA	NA	2	1.19e-05	AT3G42050	vacuolar ATP synthase subunit H family protein
AT3G43250	NA	NA	NA	NA	2	4.01e-06	AT3G43250	coiled-coil protein (DUF572)
AT3G44110	NA	NA	NA	NA	6	0.00033249	J3	DNAJ homologue 3
AT3G44190	NA	NA	NA	NA	4	5.73e-05	AT3G44190	FAD/NAD(P)-binding oxidoreductase family protein
AT3G44830	NA	NA	NA	NA	1	0	AT3G44830	Lecithin:cholesterol acyltransferase family protein
AT3G45040	NA	NA	NA	NA	9	0.00055086	AT3G45040	phosphatidate cytidylyltransferase family protein
AT3G46010	NA	NA	NA	NA	4	8.32e-05	ADF1	actin depolymerizing factor 1
AT3G46060	NA	NA	NA	NA	1	0	RABE1c	RAB GTPase homolog 8A
AT3G46080	NA	NA	2	0.00088441	4	7.08e-05	AT3G46080	C2H2-type zinc finger family protein
AT3G46280	NA	NA	2	0.00037551	NA	NA	AT3G46280	kinase-like protein
AT3G46620	NA	NA	NA	NA	4	8.45e-05	RDUF1	zinc finger (C3HC4-type RING finger) family protein
AT3G46670	NA	NA	NA	NA	5	8.01e-05	UGT76E11	UDP-glucosyl transferase 76E11
AT3G46690	NA	NA	NA	NA	2	1.19e-05	AT3G46690	UDP-Glycosyltransferase superfamily protein
AT3G46820	NA	NA	NA	NA	1	0	TOPP5	type one serine/threonine protein phosphatase 5
AT3G47380	NA	NA	NA	NA	3	4.18e-05	AT3G47380	Plant invertase/pectin methylesterase inhibitor superfamily protein
AT3G47480	NA	NA	1	0	NA	NA	AT3G47480	Calcium-binding EF-hand family protein
AT3G47520	NA	NA	NA	NA	8	0.00051355	MDH	malate dehydrogenase
AT3G48140	NA	NA	NA	NA	5	0.00019758	AT3G48140	B12D protein
AT3G48360	NA	NA	NA	NA	3	6.99e-05	BT2	BTB and TAZ domain protein 2
AT3G48650	NA	NA	2	0.00161383	NA	NA	AT3G48650	pseudogene of pectinesterase%2C putative (DUF677)
AT3G48780	NA	NA	NA	NA	5	0.00014665	SPT1	serine palmitoyltransferase 1
AT3G48840	NA	NA	NA	NA	2	4.01e-06	AT3G48840	RNA-binding (RRM/RBD/RNP motifs) family protein
AT3G48870	NA	NA	NA	NA	4	6.14e-05	HSP93-III	Clp ATPase
AT3G48990	NA	NA	1	0	11	0.00066282	AAE3	AMP-dependent synthetase and ligase family protein
AT3G49210	NA	NA	NA	NA	5	0.00011028	AT3G49210	O-acyltransferase (WSD1-like) family protein
AT3G49780	NA	NA	2	0.00088441	NA	NA	PSK4	phytosulfokine 4 precursor
AT3G49845	NA	NA	NA	NA	1	0	WIH3	cysteine-rich TM module stress tolerance protein
AT3G50480	NA	NA	2	0.00037551	1	0	HR4	homolog of RPW8 4
AT3G50930	NA	NA	1	0	4	5.08e-05	BCS1	cytochrome BC1 synthesi
AT3G51090	NA	NA	NA	NA	3	4.98e-05	AT3G51090	coiled-coil 90B-like protein (DUF1640)
AT3G51160	NA	NA	NA	NA	2	1.29e-05	MUR1	NAD(P)-binding Rossmann-fold superfamily protein
AT3G51580	NA	NA	NA	NA	2	1.96e-05	AT3G51580	transmembrane protein
AT3G51660	NA	NA	NA	NA	1	0	AT3G51660	Tautomerase/MIF superfamily protein
AT3G51790	NA	NA	NA	NA	1	0	G1	transmembrane protein G1P-related 1
AT3G51800	NA	NA	NA	NA	1	0	ATG2	metallopeptidase M24 family protein
AT3G51860	NA	NA	NA	NA	4	8.74e-05	CAX3	cation exchanger 3
AT3G51890	NA	NA	2	0.00037551	NA	NA	AT3G51890	Clathrin light chain protein
AT3G52540	NA	NA	NA	NA	4	5.73e-05	OFP18	ovate family protein 18
AT3G52560	NA	NA	NA	NA	2	1.84e-05	UEV1D-4	ubiquitin E2 variant 1D-4
AT3G53430	NA	NA	NA	NA	1	0	AT3G53430	Ribosomal protein L11 family protein
AT3G53710	NA	NA	NA	NA	7	0.00037853	AGD6	ARF-GAP domain 6
AT3G53720	NA	NA	NA	NA	6	0.00010714	CHX20	cation/H exchanger 20
AT3G53930	NA	NA	NA	NA	3	4.98e-05	AT3G53930	Protein kinase superfamily protein
AT3G54130	NA	NA	NA	NA	2	5.76e-06	AT3G54130	Josephin family protein
AT3G55560	NA	NA	NA	NA	1	0	AGF2	AT-hook protein of GA feedback 2
AT3G55950	NA	NA	NA	NA	3	1.63e-05	CCR3	CRINKLY4 related 3
AT3G56150	NA	NA	NA	NA	7	0.00028128	EIF3C	eukaryotic translation initiation factor 3C
AT3G57090	NA	NA	NA	NA	4	0.0001043	BIGYIN	Tetratricopeptide repeat (TPR)-like superfamily protein
AT3G57240	NA	NA	1	0	NA	NA	BG3	beta-1,3-glucanase 3
AT3G57410	NA	NA	NA	NA	1	0	VLN3	villin 3
AT3G57490	NA	NA	NA	NA	1	0	AT3G57490	Ribosomal protein S5 family protein
AT3G58750	NA	NA	NA	NA	5	0.00012719	CSY2	citrate synthase 2
AT3G59290	NA	NA	NA	NA	3	1.63e-05	AT3G59290	ENTH/VHS family protein
AT3G59660	NA	NA	NA	NA	8	0.00025993	AT3G59660	C2 domain-containing protein / GRAM domain-containing protein
AT3G59760	NA	NA	NA	NA	6	0.00024263	OASC	O-acetylserine (thiol) lyase isoform C
AT3G60190	NA	NA	NA	NA	1	0	DL1E	DYNAMIN-like 1E
AT3G60420	NA	NA	2	0.00037551	NA	NA	AT3G60420	phosphoglycerate mutase family protein
AT3G60680	NA	NA	NA	NA	1	0	AT3G60680	DUF641 family protein (DUF641)
AT3G60770	NA	NA	NA	NA	2	2.71e-05	AT3G60770	Ribosomal protein S13/S15
AT3G60966	NA	NA	1	0	NA	NA	AT3G60966	RING/U-box superfamily protein
AT3G61440	NA	NA	NA	NA	2	3.51e-06	CYSC1	cysteine synthase C1
AT3G62310	NA	NA	NA	NA	1	0	AT3G62310	RNA helicase family protein
AT3G62400	NA	NA	NA	NA	1	0	AT3G62400	cytochrome C oxidase subunit
AT3G62420	NA	NA	NA	NA	2	1.41e-05	BZIP53	basic region/leucine zipper motif 53
AT3G62422	NA	NA	NA	NA	1	0
AT3G62590	NA	NA	NA	NA	1	0	AT3G62590	alpha/beta-Hydrolases superfamily protein
AT3G62600	NA	NA	NA	NA	4	9.15e-05	ATERDJ3B	DNAJ heat shock family protein
AT3G62770	NA	NA	NA	NA	7	0.00026756	AtATG18a	Transducin/WD40 repeat-like superfamily protein
AT3G63460	NA	NA	NA	NA	2	2.72e-06	AT3G63460	transducin family protein / WD-40 repeat family protein
AT4G00330	NA	NA	NA	NA	4	8.78e-05	CRCK2	calmodulin-binding receptor-like cytoplasmic kinase 2
AT4G00860	NA	NA	NA	NA	5	0.00019758	ATOZI1	monopolar spindle protein (DUF1138)
AT4G01370	NA	NA	1	0	NA	NA	MPK4	MAP kinase 4
AT4G01810	NA	NA	NA	NA	1	0	AT4G01810	Sec23/Sec24 protein transport family protein
AT4G01870	NA	NA	5	0.00554515	9	0.00037258	AT4G01870	tolB protein-like protein
AT4G02380	NA	NA	NA	NA	1	0	SAG21	senescence-associated gene 21
AT4G02940	NA	NA	NA	NA	9	0.00032808	AT4G02940	oxidoreductase, 2OG-Fe(II) oxygenase family protein
AT4G03020	NA	NA	NA	NA	1	0	AT4G03020	transducin family protein / WD-40 repeat family protein
AT4G03320	NA	NA	NA	NA	2	1.48e-05	Tic20-IV	translocon at the inner envelope membrane of chloroplasts 20-IV
AT4G04210	NA	NA	NA	NA	2	1.19e-05	PUX4	plant UBX domain containing protein 4
AT4G04220	NA	NA	1	0	NA	NA	RLP46	receptor like protein 46
AT4G04221	NA	NA	2	0.00037551	NA	NA	AT4G04221	Natural antisense transcript overlaps with AT4G04220
AT4G04480	NA	NA	NA	NA	1	0	AT4G04480	F-box protein with a domain protein
AT4G04490	NA	NA	NA	NA	2	4.01e-06	CRK36	cysteine-rich RLK (RECEPTOR-like protein kinase) 36
AT4G04610	NA	NA	NA	NA	8	0.0002324	2017-04-01	APS reductase 1
AT4G04960	NA	NA	2	0.00161383	3	4.84e-05	AT4G04960	Concanavalin A-like lectin protein kinase family protein
AT4G05320	NA	NA	NA	NA	1	0	UBQ10	polyubiquitin 10
AT4G08320	NA	NA	NA	NA	2	8.82e-06	TPR8	Tetratricopeptide repeat (TPR)-like superfamily protein
AT4G08390	NA	NA	2	0.00064721	5	0.0001523	SAPX	stromal ascorbate peroxidase
AT4G08500	NA	NA	NA	NA	3	1.63e-05	MEKK1	MAPK/ERK kinase kinase 1
AT4G08555	NA	NA	3	0.00287375	NA	NA	AT4G08555	hypothetical protein
AT4G09000	NA	NA	NA	NA	1	0	GRF1	general regulatory factor 1
AT4G10040	NA	NA	NA	NA	8	0.00036136	CYTC-2	cytochrome c-2
AT4G10610	NA	NA	NA	NA	1	0	CID12	CTC-interacting domain 12
AT4G11150	NA	NA	NA	NA	4	0.00011125	TUF	vacuolar ATP synthase subunit E1
AT4G11260	NA	NA	1	0	NA	NA	SGT1B	phosphatase-like protein
AT4G11521	NA	NA	NA	NA	1	0	AT4G11521	Receptor-like protein kinase-related family protein
AT4G11890	NA	NA	1	0	NA	NA	ARCK1	Protein kinase superfamily protein
AT4G12070	NA	NA	NA	NA	4	0.0001043	AT4G12070	hypothetical protein
AT4G12250	NA	NA	NA	NA	1	0	GAE5	UDP-D-glucuronate 4-epimerase 5
AT4G12770	NA	NA	NA	NA	2	1.61e-05	AT4G12770	Chaperone DnaJ-domain superfamily protein
AT4G12780	NA	NA	NA	NA	3	2.62e-05	AT4G12780	Chaperone DnaJ-domain superfamily protein
AT4G13180	NA	NA	3	0.00112491	9	0.0004184	AT4G13180	NAD(P)-binding Rossmann-fold superfamily protein
AT4G13350	NA	NA	1	0	NA	NA	NIG	NSP (nuclear shuttle protein)-interacting GTPase
AT4G13395	NA	NA	NA	NA	2	8.82e-06	RTFL12	ROTUNDIFOLIA like 12
AT4G13505	NA	NA	1	0	NA	NA	AT4G13505	Natural antisense transcript overlaps with AT4G13510
AT4G13918	NA	NA	NA	NA	1	0	AT4G13918	Natural antisense transcript overlaps with AT4G13920
AT4G13920	NA	NA	NA	NA	4	9.99e-05	RLP50	receptor like protein 50
AT4G14420	NA	NA	NA	NA	2	1.84e-05	AT4G14420	HR-like lesion-inducing protein-like protein
AT4G14430	NA	NA	NA	NA	2	1.19e-05	IBR10	indole-3-butyric acid response 10
AT4G14610	NA	NA	1	0	NA	NA	AT4G14610	pseudogene of Disease resistance protein (CC-NBS-LRR class) family
AT4G15417	NA	NA	1	0	NA	NA	RTL1	RNAse II-like 1
AT4G15420	NA	NA	NA	NA	8	0.0002637	AT4G15420	Ubiquitin fusion degradation UFD1 family protein
AT4G15550	NA	NA	1	0	NA	NA	IAGLU	indole-3-acetate beta-D-glucosyltransferase
AT4G15760	NA	NA	1	0	NA	NA	MO1	monooxygenase 1
AT4G16260	NA	NA	NA	NA	2	7.82e-06	AT4G16260	Glycosyl hydrolase superfamily protein
AT4G16500	NA	NA	NA	NA	1	0	AT4G16500	Cystatin/monellin superfamily protein
AT4G16660	NA	NA	NA	NA	10	0.00045049	AT4G16660	heat shock protein 70 (Hsp 70) family protein
AT4G17245	NA	NA	NA	NA	5	9.99e-05	AT4G17245	RING/U-box superfamily protein
AT4G17270	NA	NA	1	0	NA	NA	AT4G17270	Mo25 family protein
AT4G17490	NA	NA	NA	NA	2	1.29e-05	ERF6	ethylene responsive element binding factor 6
AT4G18010	NA	NA	1	0	15	0.0010144	IP5PII	myo-inositol polyphosphate 5-phosphatase 2
AT4G18250	NA	NA	NA	NA	3	2.35e-05	AT4G18250	receptor Serine/Threonine kinase-like protein
AT4G18800	NA	NA	NA	NA	1	0	RABA1d	RAB GTPase homolog A1D
AT4G18890	NA	NA	NA	NA	1	0	BEH3	BES1/BZR1 homolog 3
AT4G19410	NA	NA	NA	NA	3	1.63e-05	AT4G19410	Pectinacetylesterase family protein
AT4G19700	NA	NA	NA	NA	1	0	RING	SBP (S-ribonuclease binding protein) family protein
AT4G19810	NA	NA	NA	NA	1	0	ChiC	Glycosyl hydrolase family protein with chitinase insertion domain-containing protein
AT4G19880	NA	NA	2	0.00161383	8	0.00027244	AT4G19880	Glutathione S-transferase family protein
AT4G20000	NA	NA	1	0	NA	NA	AT4G20000	VQ motif-containing protein
AT4G20330	NA	NA	NA	NA	2	1.32e-05	AT4G20330	Transcription initiation factor TFIIE, beta subunit
AT4G21120	NA	NA	3	0.00287375	NA	NA	AAT1	amino acid transporter 1
AT4G21380	NA	NA	1	0	NA	NA	RK3	receptor kinase 3
AT4G21580	NA	NA	NA	NA	1	0	AT4G21580	oxidoreductase, zinc-binding dehydrogenase family protein
AT4G21990	NA	NA	NA	NA	5	2.73e-05	2017-04-03	APS reductase 3
AT4G22030	NA	NA	NA	NA	1	0	AT4G22030	F-box protein with a domain protein
AT4G22070	NA	NA	NA	NA	1	0	WRKY31	WRKY DNA-binding protein 31
AT4G22240	NA	NA	NA	NA	1	0	AT4G22240	Plastid-lipid associated protein PAP / fibrillin family protein
AT4G22520	NA	NA	2	0.00161383	NA	NA	AT4G22520	Bifunctional inhibitor/lipid-transfer protein/seed storage 2S albumin superfamily protein
AT4G22530	NA	NA	1	0	4	5.08e-05	AT4G22530	S-adenosyl-L-methionine-dependent methyltransferases superfamily protein
AT4G23030	NA	NA	NA	NA	1	0	AT4G23030	MATE efflux family protein
AT4G23150	NA	NA	NA	NA	1	0	CRK7	cysteine-rich RLK (RECEPTOR-like protein kinase) 7
AT4G23260	NA	NA	1	0	NA	NA	CRK18	cysteine-rich RLK (RECEPTOR-like protein kinase) 18
AT4G23470	NA	NA	1	0	5	0.00012211	AT4G23470	PLAC8 family protein
AT4G23710	NA	NA	NA	NA	2	1.41e-05	VAG2	vacuolar ATP synthase subunit G2
AT4G23850	NA	NA	1	0	NA	NA	LACS4	AMP-dependent synthetase and ligase family protein
AT4G24040	NA	NA	NA	NA	1	0	TRE1	trehalase 1
AT4G24330	NA	NA	NA	NA	6	0.00020584	AT4G24330	hypothetical protein (DUF1682)
AT4G24570	NA	NA	NA	NA	1	0	DIC2	dicarboxylate carrier 2
AT4G24820	NA	NA	NA	NA	5	0.00019758	AT4G24820	26S proteasome regulatory subunit Rpn7
AT4G24920	NA	NA	1	0	7	0.00027669	AT4G24920	secE/sec61-gamma protein transport protein
AT4G25210	NA	NA	NA	NA	4	2.3e-05	AT4G25210	DNA-binding storekeeper protein-related transcriptional regulator
AT4G25690	NA	NA	NA	NA	1	0	AT4G25690	stress response NST1-like protein
AT4G25710	NA	NA	NA	NA	1	0	AT4G25710	Galactose oxidase/kelch repeat superfamily protein
AT4G25900	NA	NA	NA	NA	3	7.12e-05	AT4G25900	Galactose mutarotase-like superfamily protein
AT4G26240	NA	NA	NA	NA	4	7.63e-05	AT4G26240	histone-lysine N-methyltransferase
AT4G26940	NA	NA	1	0	1	0	AT4G26940	Galactosyltransferase family protein
AT4G27500	NA	NA	NA	NA	6	8.71e-05	PPI1	proton pump interactor 1
AT4G27585	NA	NA	NA	NA	3	5.86e-05	AT4G27585	SPFH/Band 7/PHB domain-containing membrane-associated protein family
AT4G27830	NA	NA	3	0.00150346	8	0.00030676	BGLU10	beta glucosidase 10
AT4G27960	NA	NA	NA	NA	10	0.00049117	UBC9	ubiquitin conjugating enzyme 9
AT4G28390	NA	NA	2	0.00037551	NA	NA	AAC3	ADP/ATP carrier 3
AT4G28400	NA	NA	NA	NA	1	0	AT4G28400	Protein phosphatase 2C family protein
AT4G28460	NA	NA	1	0	1	0	AT4G28460	transmembrane protein
AT4G29040	NA	NA	NA	NA	2	1.96e-05	RPT2a	regulatory particle AAA-ATPase 2A
AT4G29220	NA	NA	NA	NA	8	0.00028421	PFK1	phosphofructokinase 1
AT4G29480	NA	NA	NA	NA	2	1.96e-05	AT4G29480	Mitochondrial ATP synthase subunit G protein
AT4G29670	NA	NA	NA	NA	8	0.00019811	ACHT2	atypical CYS HIS rich thioredoxin 2
AT4G29810	NA	NA	2	0.00037551	1	0	MKK2	MAP kinase kinase 2
AT4G29950	NA	NA	1	0	NA	NA	AT4G29950	Ypt/Rab-GAP domain of gyp1p superfamily protein
AT4G30160	NA	NA	NA	NA	5	0.00020658	VLN4	villin 4
AT4G30190	NA	NA	1	0	NA	NA	HA2	H[ ]-ATPase 2
AT4G30240	NA	NA	NA	NA	8	0.00022022	AT4G30240	Syntaxin/t-SNARE family protein
AT4G30280	NA	NA	NA	NA	6	3.1e-05	XTH18	xyloglucan endotransglucosylase/hydrolase 18
AT4G30890	NA	NA	NA	NA	3	6.19e-05	UBP24	ubiquitin-specific protease 24
AT4G31300	NA	NA	NA	NA	4	5.73e-05	PBA1	N-terminal nucleophile aminohydrolases (Ntn hydrolases) superfamily protein
AT4G31700	NA	NA	NA	NA	1	0	RPS6	ribosomal protein S6
AT4G31860	NA	NA	NA	NA	2	1.35e-05	AT4G31860	Protein phosphatase 2C family protein
AT4G32070	NA	NA	NA	NA	7	0.00021523	Phox4	Octicosapeptide/Phox/Bem1p (PB1) domain-containing protein / tetratricopeptide repeat (TPR)-containing protein
AT4G32140	NA	NA	NA	NA	5	0.00012719	AT4G32140	EamA-like transporter family
AT4G32400	NA	NA	NA	NA	1	0	SHS1	Mitochondrial substrate carrier family protein
AT4G33050	NA	NA	NA	NA	2	2.17e-05	EDA39	calmodulin-binding family protein
AT4G33565	NA	NA	NA	NA	3	2.44e-05	AT4G33565	RING/U-box superfamily protein
AT4G33925	NA	NA	NA	NA	4	4.34e-05	SSN2	zinc finger SWIM domain protein
AT4G34135	NA	NA	3	0.00297147	4	7.08e-05	UGT73B2	UDP-glucosyltransferase 73B2
AT4G34390	NA	NA	1	0	1	0	XLG2	extra-large GTP-binding protein 2
AT4G34470	NA	NA	NA	NA	1	0	SK12	SKP1-like 12
AT4G34660	NA	NA	NA	NA	1	0	AT4G34660	SH3 domain-containing protein
AT4G34890	NA	NA	NA	NA	1	0	XDH1	xanthine dehydrogenase 1
AT4G35180	NA	NA	2	0.00161383	NA	NA	LHT7	LYS/HIS transporter 7
AT4G35310	NA	NA	1	0	NA	NA	CPK5	calmodulin-domain protein kinase 5
AT4G35460	NA	NA	NA	NA	1	0	NTRB	NADPH-dependent thioredoxin reductase B
AT4G35620	NA	NA	NA	NA	1	0	CYCB2;2	Cyclin B2;2
AT4G35630	NA	NA	NA	NA	8	0.00049883	PSAT	phosphoserine aminotransferase
AT4G36020	NA	NA	NA	NA	3	6.19e-05	CSDP1	cold shock domain protein 1
AT4G36030	NA	NA	NA	NA	3	1.63e-05	ARO3	armadillo repeat only 3
AT4G36220	NA	NA	NA	NA	2	1.29e-05	FAH1	ferulic acid 5-hydroxylase 1
AT4G36640	NA	NA	NA	NA	8	0.00013482	AT4G36640	Sec14p-like phosphatidylinositol transfer family protein
AT4G36880	NA	NA	NA	NA	3	1.63e-05	CP1	cysteine proteinase1
AT4G36945	NA	NA	NA	NA	1	0	AT4G36945	PLC-like phosphodiesterases superfamily protein
AT4G36950	NA	NA	NA	NA	2	1.19e-05	MAPKKK21	mitogen-activated protein kinase kinase kinase 21
AT4G37120	NA	NA	NA	NA	14	0.00073117	SMP2	Pre-mRNA splicing Prp18-interacting factor
AT4G37310	NA	NA	NA	NA	3	4.98e-05	CYP81H1	cytochrome P450, family 81, subfamily H, polypeptide 1
AT4G37670	NA	NA	NA	NA	3	1.63e-05	NAGS2	N-acetyl-l-glutamate synthase 2
AT4G37900	NA	NA	1	0	NA	NA	AT4G37900	hypothetical protein (duplicated DUF1399)
AT4G38030	NA	NA	NA	NA	1	0	AT4G38030	Rhamnogalacturonate lyase family protein
AT4G38630	NA	NA	NA	NA	2	1.61e-05	RPN10	regulatory particle non-ATPase 10
AT4G39270	NA	NA	NA	NA	7	0.0004364	AT4G39270	Leucine-rich repeat protein kinase family protein
AT4G39390	NA	NA	NA	NA	1	0	NST-K1	nucleotide sugar transporter-KT 1
AT4G39540	NA	NA	NA	NA	9	0.00028488	SK2	shikimate kinase 2
AT4G39640	NA	NA	NA	NA	2	8.82e-06	GGT1	gamma-glutamyl transpeptidase 1
AT4G39820	NA	NA	NA	NA	2	2.53e-05	AT4G39820	Tetratricopeptide repeat (TPR)-like superfamily protein
AT4G39830	NA	NA	2	0.00037551	NA	NA	AT4G39830	Cupredoxin superfamily protein
AT4G39850	NA	NA	NA	NA	2	1.82e-05	ABCD1	peroxisomal ABC transporter 1
AT4G40020	NA	NA	NA	NA	1	0	AT4G40020	Myosin heavy chain-related protein
AT4G40080	NA	NA	NA	NA	1	0	AT4G40080	ENTH/ANTH/VHS superfamily protein
AT5G01210	NA	NA	NA	NA	1	0	AT5G01210	HXXXD-type acyl-transferase family protein
AT5G01215	NA	NA	1	0	3	1.63e-05	AT5G01215	Natural antisense transcript overlaps with AT5G01210
AT5G01340	NA	NA	NA	NA	7	0.00012114	mSFC1	Mitochondrial substrate carrier family protein
AT5G01410	NA	NA	NA	NA	2	2.92e-05	RSR4	Aldolase-type TIM barrel family protein
AT5G01540	NA	NA	1	0	NA	NA	LECRKA4.1	lectin receptor kinase a4.1
AT5G01550	NA	NA	1	0	NA	NA	LECRKA4.2	lectin receptor kinase a4.1
AT5G01720	NA	NA	NA	NA	4	9.99e-05	AT5G01720	RNI-like superfamily protein
AT5G01810	NA	NA	NA	NA	7	7.85e-05	CIPK15	CBL-interacting protein kinase 15
AT5G02490	NA	NA	1	0	5	0.00014438	Hsp70-2	Heat shock protein 70 (Hsp 70) family protein
AT5G03380	NA	NA	NA	NA	9	0.00035544	AT5G03380	Heavy metal transport/detoxification superfamily protein
AT5G03890	NA	NA	NA	NA	5	6.25e-05	AT5G03890	hypothetical protein
AT5G04020	NA	NA	NA	NA	12	0.00058964	AT5G04020	calmodulin binding protein
AT5G04390	NA	NA	NA	NA	4	5.73e-05	AT5G04390	C2H2-type zinc finger family protein
AT5G04720	NA	NA	1	0	NA	NA	ADR1-L2	ADR1-like 2
AT5G04800	NA	NA	NA	NA	1	0	AT5G04800	Ribosomal S17 family protein
AT5G04980	NA	NA	1	0	2	1.61e-05	AT5G04980	DNAse I-like superfamily protein
AT5G05140	NA	NA	NA	NA	8	0.00027758	AT5G05140	Transcription elongation factor (TFIIS) family protein
AT5G05190	NA	NA	1	0	NA	NA	AT5G05190	hypothetical protein (DUF3133)
AT5G05340	NA	NA	3	0.00151993	4	3.73e-05	PRX52	Peroxidase superfamily protein
AT5G05600	NA	NA	NA	NA	5	9e-05	AT5G05600	2-oxoglutarate (2OG) and Fe(II)-dependent oxygenase superfamily protein
AT5G05780	NA	NA	NA	NA	1	0	RPN8A	RP non-ATPase subunit 8A
AT5G06320	NA	NA	3	0.00287375	NA	NA	NHL3	NDR1/HIN1-like 3
AT5G06600	NA	NA	NA	NA	7	0.00014953	UBP12	ubiquitin-specific protease 12
AT5G06730	NA	NA	1	0	1	0	AT5G06730	Peroxidase superfamily protein
AT5G07010	NA	NA	NA	NA	6	9.65e-05	ST2A	sulfotransferase 2A
AT5G07440	NA	NA	NA	NA	5	7.68e-05	GDH2	glutamate dehydrogenase 2
AT5G07740	NA	NA	NA	NA	4	5.94e-05	AT5G07740	actin binding protein
AT5G08139	NA	NA	NA	NA	1	0	AT5G08139	RING/U-box superfamily protein
AT5G08240	NA	NA	2	0.00161383	4	0.00010065	AT5G08240	transmembrane protein
AT5G08560	NA	NA	NA	NA	6	8.71e-05	AT5G08560	transducin family protein / WD-40 repeat family protein
AT5G08680	NA	NA	NA	NA	1	0	AT5G08680	ATP synthase alpha/beta family protein
AT5G08780	NA	NA	NA	NA	2	1.35e-05	AT5G08780	winged-helix DNA-binding transcription factor family protein
AT5G09330	NA	NA	NA	NA	7	0.00027398	NAC082	NAC domain containing protein 82
AT5G09650	NA	NA	NA	NA	1	0	PPa6	pyrophosphorylase 6
AT5G09680	NA	NA	NA	NA	2	8.82e-06	RLF	reduced lateral root formation
AT5G09790	NA	NA	NA	NA	3	1.63e-05	ATXR5	TRITHORAX-RELATED PROTEIN 5
AT5G10010	NA	NA	NA	NA	1	0	AT5G10010	myosin-H heavy protein
AT5G10625	NA	NA	NA	NA	4	5.08e-05	AT5G10625	flowering-promoting factor-like protein
AT5G10695	NA	NA	1	0	4	5.08e-05	AT5G10695	methionyl-tRNA synthetase
AT5G10840	NA	NA	NA	NA	1	0	EMP1	Endomembrane protein 70 protein family
AT5G11740	NA	NA	NA	NA	7	0.00034256	AGP15	arabinogalactan protein 15
AT5G11950	NA	NA	NA	NA	1	0	LOG8	Putative lysine decarboxylase family protein
AT5G12880	NA	NA	NA	NA	4	4.34e-05	AT5G12880	proline-rich family protein
AT5G12930	NA	NA	1	0	NA	NA	AT5G12930	inactive rhomboid protein
AT5G13110	NA	NA	3	0.00078674	10	0.00027087	G6PD2	glucose-6-phosphate dehydrogenase 2
AT5G13180	NA	NA	NA	NA	1	0	NAC083	NAC domain containing protein 83
AT5G13320	NA	NA	2	0.00037551	NA	NA	PBS3	Auxin-responsive GH3 family protein
AT5G13330	NA	NA	1	0	2	1.82e-06	Rap2.6L	related to AP2 6l
AT5G13420	NA	NA	NA	NA	11	0.00046831	TRA2	Aldolase-type TIM barrel family protein
AT5G13440	NA	NA	NA	NA	1	0	AT5G13440	Ubiquinol-cytochrome C reductase iron-sulfur subunit
AT5G13550	NA	NA	NA	NA	2	8.82e-06	SULTR4;1	sulfate transporter 4.1
AT5G13820	NA	NA	NA	NA	10	0.00049516	TBP1	telomeric DNA binding protein 1
AT5G13860	NA	NA	NA	NA	10	0.0005831	ELC-Like	ELCH-like protein
AT5G14030	NA	NA	NA	NA	2	1.19e-05	AT5G14030	translocon-associated protein beta (TRAPB) family protein
AT5G14120	NA	NA	NA	NA	6	0.0001659	AT5G14120	Major facilitator superfamily protein
AT5G14180	NA	NA	NA	NA	1	0	MPL1	Myzus persicae-induced lipase 1
AT5G14420	NA	NA	NA	NA	1	0	RGLG2	RING domain ligase2
AT5G14640	NA	NA	NA	NA	1	0	SK13	shaggy-like kinase 13
AT5G14650	NA	NA	NA	NA	5	3.75e-05	AT5G14650	Pectin lyase-like superfamily protein
AT5G14780	NA	NA	NA	NA	1	0	FDH	formate dehydrogenase
AT5G15090	NA	NA	NA	NA	1	0	VDAC3	voltage dependent anion channel 3
AT5G15730	NA	NA	NA	NA	4	9.52e-05	CRLK2	Protein kinase superfamily protein
AT5G16080	NA	NA	NA	NA	5	9.99e-05	CXE17	carboxyesterase 17
AT5G16170	NA	NA	1	0	2	1.48e-05	AT5G16170	Core-2/I-branching beta-1,6-N-acetylglucosaminyltransferase family protein
AT5G16235	NA	NA	1	0	NA	NA	AT5G16235	Natural antisense transcript overlaps with AT5G16230
AT5G16450	NA	NA	NA	NA	2	1.32e-05	AT5G16450	Ribonuclease E inhibitor RraA/Dimethylmenaquinone methyltransferase
AT5G16510	NA	NA	NA	NA	1	0	RGP5	Alpha-1,4-glucan-protein synthase family protein
AT5G16910	NA	NA	NA	NA	4	0.0001043	CSLD2	cellulose-synthase like D2
AT5G16980	NA	NA	NA	NA	3	9.88e-06	AT5G16980	Zinc-binding dehydrogenase family protein
AT5G17020	NA	NA	NA	NA	1	0	XPO1A	exportin 1A
AT5G17280	NA	NA	NA	NA	3	3.2e-05	AT5G17280	oxidoreductase-like protein, amino-terminal protein
AT5G17330	NA	NA	2	0.00037551	NA	NA	GAD	glutamate decarboxylase
AT5G17650	NA	NA	NA	NA	1	0	AT5G17650	glycine/proline-rich protein
AT5G18190	NA	NA	NA	NA	3	4.18e-05	AT5G18190	Protein kinase family protein
AT5G18280	NA	NA	NA	NA	1	0	APY2	apyrase 2
AT5G18400	NA	NA	1	0	8	0.00042317	AT5G18400	Cytokine-induced anti-apoptosis inhibitor 1, Fe-S biogenesi
AT5G18490	NA	NA	NA	NA	1	0	AT5G18490	vacuolar sorting-associated protein (DUF946)
AT5G18520	NA	NA	NA	NA	3	4.68e-05	Cand7	Lung seven transmembrane receptor family protein
AT5G19000	NA	NA	NA	NA	8	0.00030501	BPM1	BTB-POZ and MATH domain 1
AT5G19230	NA	NA	NA	NA	4	4.12e-05	AT5G19230	Glycoprotein membrane precursor GPI-anchored
AT5G19440	NA	NA	4	0.00254494	10	0.00045451	AT5G19440	NAD(P)-binding Rossmann-fold superfamily protein
AT5G19550	NA	NA	1	0	10	0.00040483	ASP2	aspartate aminotransferase 2
AT5G19855	NA	NA	NA	NA	12	0.00075213	RbcX2	Chaperonin-like RbcX protein
AT5G19880	NA	NA	1	0	NA	NA	AT5G19880	Peroxidase superfamily protein
AT5G20010	NA	NA	NA	NA	4	0.00011125	RAN-1	RAS-related nuclear protein-1
AT5G20020	NA	NA	NA	NA	4	0.00011125	RAN2	RAS-related GTP-binding nuclear protein 2
AT5G20810	NA	NA	NA	NA	2	1.82e-05	AT5G20810	SAUR-like auxin-responsive protein family
AT5G20990	NA	NA	2	0.00161383	NA	NA	B73	molybdopterin biosynthesis CNX1 protein / molybdenum cofactor biosynthesis enzyme CNX1 (CNX1)
AT5G21090	NA	NA	NA	NA	1	0	AT5G21090	Leucine-rich repeat (LRR) family protein
AT5G21990	NA	NA	NA	NA	5	0.00014665	TPR7	Tetratricopeptide repeat (TPR)-like superfamily protein
AT5G22060	NA	NA	1	0	13	0.00081855	J2	DNAJ homologue 2
AT5G22250	NA	NA	NA	NA	4	8.96e-05	CAF1b	Polynucleotidyl transferase, ribonuclease H-like superfamily protein
AT5G22770	NA	NA	NA	NA	4	6.35e-05	alpha-ADR	alpha-adaptin
AT5G23160	NA	NA	1	0	NA	NA	AT5G23160	transmembrane protein
AT5G23540	NA	NA	NA	NA	9	0.00038854	AT5G23540	Mov34/MPN/PAD-1 family protein
AT5G23630	NA	NA	NA	NA	4	6.35e-05	PDR2	phosphate deficiency response 2
AT5G24205	NA	NA	1	0	NA	NA	AT5G24205
AT5G24210	NA	NA	3	0.00287375	2	2.18e-05	AT5G24210	alpha/beta-Hydrolases superfamily protein
AT5G24760	NA	NA	NA	NA	1	0	AT5G24760	GroES-like zinc-binding dehydrogenase family protein
AT5G25170	NA	NA	NA	NA	3	3.6e-05	AT5G25170	PPPDE putative thiol peptidase family protein
AT5G25250	NA	NA	1	0	3	2.87e-05	FLOT1	SPFH/Band 7/PHB domain-containing membrane-associated protein family
AT5G25260	NA	NA	1	0	NA	NA	AT5G25260	SPFH/Band 7/PHB domain-containing membrane-associated protein family
AT5G25265	NA	NA	2	0.00037551	NA	NA	AT5G25265	Hyp O-arabinosyltransferase-like protein
AT5G25350	NA	NA	1	0	NA	NA	EBF2	EIN3-binding F box protein 2
AT5G25910	NA	NA	2	0.00017238	1	0	RLP52	receptor like protein 52
AT5G25940	NA	NA	NA	NA	2	1.37e-05	AT5G25940	early nodulin-like protein
AT5G26600	NA	NA	NA	NA	5	0.00016378	AT5G26600	Pyridoxal phosphate (PLP)-dependent transferases superfamily protein
AT5G26660	NA	NA	NA	NA	3	1.63e-05	MYB86	myb domain protein 86
AT5G26667	NA	NA	NA	NA	2	2.18e-05	PYR6	P-loop containing nucleoside triphosphate hydrolases superfamily protein
AT5G27030	NA	NA	NA	NA	4	4.73e-05	TPR3	TOPLESS-related 3
AT5G27610	NA	NA	1	0	1	0	ALY1	protein ALWAYS EARLY 1
AT5G27640	NA	NA	NA	NA	3	4.76e-05	TIF3B1	translation initiation factor 3B1
AT5G28540	NA	NA	NA	NA	8	0.00030867	BIP1	heat shock protein 70 (Hsp 70) family protein
AT5G35200	NA	NA	1	0	8	0.0004257	AT5G35200	ENTH/ANTH/VHS superfamily protein
AT5G35620	NA	NA	NA	NA	5	0.00014112	LSP1	Eukaryotic initiation factor 4E protein
AT5G35680	NA	NA	NA	NA	4	0.00011125	AT5G35680	Nucleic acid-binding, OB-fold-like protein
AT5G36925	NA	NA	NA	NA	3	1.63e-05	AT5G36925	hypothetical protein
AT5G36970	NA	NA	NA	NA	3	5.14e-05	NHL25	NDR1/HIN1-like 25
AT5G38200	NA	NA	NA	NA	4	5.08e-05	AT5G38200	Class I glutamine amidotransferase-like superfamily protein
AT5G38710	NA	NA	NA	NA	4	8.63e-05	AT5G38710	Methylenetetrahydrofolate reductase family protein
AT5G38830	NA	NA	NA	NA	7	0.0004364	AT5G38830	Cysteinyl-tRNA synthetase, class Ia family protein
AT5G39580	NA	NA	NA	NA	3	5.03e-05	AT5G39580	Peroxidase superfamily protein
AT5G39740	NA	NA	NA	NA	1	0	RPL5B	ribosomal protein L5 B
AT5G39785	NA	NA	2	0.00035782	NA	NA	AT5G39785	hypothetical protein (DUF1666)
AT5G40650	NA	NA	NA	NA	2	1.19e-05	SDH2-2	succinate dehydrogenase 2-2
AT5G40760	NA	NA	2	0.00025248	8	0.00019423	G6PD6	glucose-6-phosphate dehydrogenase 6
AT5G40780	NA	NA	NA	NA	1	0	LHT1	lysine histidine transporter 1
AT5G40850	NA	NA	NA	NA	3	1.63e-05	UPM1	urophorphyrin methylase 1
AT5G41080	NA	NA	NA	NA	2	2.71e-05	GDPD2	PLC-like phosphodiesterases superfamily protein
AT5G41740	NA	NA	1	0	NA	NA	AT5G41740	Disease resistance protein (TIR-NBS-LRR class) family
AT5G42020	NA	NA	NA	NA	8	0.00030867	BIP2	Heat shock protein 70 (Hsp 70) family protein
AT5G42250	NA	NA	1	0	NA	NA	AT5G42250	Zinc-binding alcohol dehydrogenase family protein
AT5G42830	NA	NA	2	0.00037551	NA	NA	AT5G42830	HXXXD-type acyl-transferase family protein
AT5G42870	NA	NA	NA	NA	5	6.25e-05	PAH2	phosphatidic acid phosphohydrolase 2
AT5G42940	NA	NA	NA	NA	3	2.84e-05	AT5G42940	RING/U-box superfamily protein
AT5G43190	NA	NA	1	0	NA	NA	AT5G43190	Galactose oxidase/kelch repeat superfamily protein
AT5G43760	NA	NA	NA	NA	3	2.1e-05	KCS20	3-ketoacyl-CoA synthase 20
AT5G44090	NA	NA	1	0	3	3.9e-05	AT5G44090	Calcium-binding EF-hand family protein
AT5G44290	NA	NA	1	0	2	8.82e-06	AT5G44290	Protein kinase superfamily protein
AT5G44720	NA	NA	NA	NA	2	2.71e-05	AT5G44720	Molybdenum cofactor sulfurase family protein
AT5G44870	NA	NA	NA	NA	1	0	LAZ5	Disease resistance protein (TIR-NBS-LRR class) family
AT5G45100	NA	NA	NA	NA	2	1.19e-05	BRG1	SBP (S-ribonuclease binding protein) family protein
AT5G45110	NA	NA	4	0.00471835	10	0.00057547	NPR3	NPR1-like protein 3
AT5G45130	NA	NA	1	0	2	1.84e-05	RHA1	Ras small GTP-binding family protein
AT5G45750	NA	NA	NA	NA	2	1.09e-05	RABA1c	RAB GTPase homolog A1C
AT5G45810	NA	NA	NA	NA	1	0	CIPK19	CBL-interacting protein kinase 19
AT5G45900	NA	NA	NA	NA	1	0	APG7	ThiF family protein
AT5G46050	NA	NA	2	0.00037551	NA	NA	PTR3	peptide transporter 3
AT5G46350	NA	NA	NA	NA	1	0	WRKY8	WRKY DNA-binding protein 8
AT5G46630	NA	NA	NA	NA	1	0	AT5G46630	Clathrin adaptor complexes medium subunit family protein
AT5G46750	NA	NA	NA	NA	4	0.0001298	AGD9	ARF-GAP domain 9
AT5G46790	NA	NA	NA	NA	4	0.00012668	PYL1	PYR1-like 1
AT5G47070	NA	NA	3	0.00287375	NA	NA	AT5G47070	Protein kinase superfamily protein
AT5G47140	NA	NA	NA	NA	3	4.76e-05	GATA27	GATA transcription factor 27
AT5G47230	NA	NA	NA	NA	4	0.00012581	ERF5	ethylene responsive element binding factor 5
AT5G47880	NA	NA	NA	NA	2	1.98e-05	ERF1-1	eukaryotic release factor 1-1
AT5G48180	NA	NA	NA	NA	3	2.85e-05	NSP5	nitrile specifier protein 5
AT5G48930	NA	NA	NA	NA	1	0	HCT	hydroxycinnamoyl-CoA shikimate/quinate hydroxycinnamoyl transferase
AT5G48970	NA	NA	NA	NA	6	0.00030134	AT5G48970	Mitochondrial substrate carrier family protein
AT5G49480	NA	NA	3	0.00078674	9	0.00043714	CP1	Ca2 -binding protein 1
AT5G49520	NA	NA	NA	NA	2	1.48e-05	WRKY48	WRKY DNA-binding protein 48
AT5G49690	NA	NA	NA	NA	2	3.51e-06	AT5G49690	UDP-Glycosyltransferase superfamily protein
AT5G50200	NA	NA	1	0	1	0	WR3	nitrate transmembrane transporter
AT5G50210	NA	NA	2	0.00017701	6	0.00013433	QS	quinolinate synthase
AT5G50960	NA	NA	NA	NA	9	0.00057211	NBP35	nucleotide binding protein 35
AT5G51060	NA	NA	NA	NA	6	0.00012395	RHD2	NADPH/respiratory burst oxidase protein D
AT5G51640	NA	NA	NA	NA	3	4.98e-05	YLS7	trichome birefringence-like protein (DUF828)
AT5G51770	NA	NA	NA	NA	3	3.94e-05	AT5G51770	Protein kinase superfamily protein
AT5G51830	NA	NA	6	0.00605236	10	0.00068665	AT5G51830	pfkB-like carbohydrate kinase family protein
AT5G52050	NA	NA	NA	NA	2	1.84e-05	AT5G52050	MATE efflux family protein
AT5G52070	NA	NA	NA	NA	2	1.75e-05	AT5G52070	Agenet domain-containing protein
AT5G54110	NA	NA	1	0	2	2.71e-05	MAMI	membrane-associated mannitol-induced
AT5G54390	NA	NA	NA	NA	4	5.73e-05	HL	HAL2-like protein
AT5G54490	NA	NA	NA	NA	1	0	PBP1	pinoid-binding protein 1
AT5G54650	NA	NA	2	0.00035782	7	0.00035295	Fh5	formin homology5
AT5G54780	NA	NA	NA	NA	2	8.82e-06	AT5G54780	Ypt/Rab-GAP domain of gyp1p superfamily protein
AT5G54840	NA	NA	2	0.00046147	3	4.16e-05	SGP1	Ras-related small GTP-binding family protein
AT5G54870	NA	NA	NA	NA	1	0	AT5G54870	inositol-1,4,5-trisphosphate 5-phosphatase
AT5G54940	NA	NA	NA	NA	2	1.84e-05	AT5G54940	Translation initiation factor SUI1 family protein
AT5G55040	NA	NA	NA	NA	2	8.82e-06	AT5G55040	DNA-binding bromodomain-containing protein
AT5G55070	NA	NA	NA	NA	6	0.00029462	AT5G55070	Dihydrolipoamide succinyltransferase
AT5G55200	NA	NA	NA	NA	1	0	MGE1	Co-chaperone GrpE family protein
AT5G55610	NA	NA	NA	NA	1	0	AT5G55610	isopentenyl-diphosphate delta-isomerase
AT5G55850	NA	NA	NA	NA	10	0.00057742	NOI	RPM1-interacting protein 4 (RIN4) family protein
AT5G55970	NA	NA	NA	NA	1	0	AT5G55970	RING/U-box superfamily protein
AT5G56170	NA	NA	NA	NA	2	8.82e-06	LLG1	LORELEI-LIKE-GPI-ANCHORED PROTEIN 1
AT5G56350	NA	NA	1	0	6	0.00024263	AT5G56350	Pyruvate kinase family protein
AT5G57123	NA	NA	NA	NA	4	5.08e-05	AT5G57123	hypothetical protein
AT5G57500	NA	NA	NA	NA	1	0	AT5G57500	Galactosyltransferase family protein
AT5G57910	NA	NA	NA	NA	10	0.0004805	AT5G57910	ribosomal RNA small subunit methyltransferase G
AT5G58060	NA	NA	NA	NA	1	0	YKT61	SNARE-like superfamily protein
AT5G58430	NA	NA	NA	NA	4	4.8e-05	EXO70B1	exocyst subunit exo70 family protein B1
AT5G58470	NA	NA	NA	NA	2	1.84e-06	TAF15b	TBP-associated factor 15B
AT5G58730	NA	NA	NA	NA	11	0.00046831	Mik	pfkB-like carbohydrate kinase family protein
AT5G58940	NA	NA	1	0	NA	NA	CRCK1	calmodulin-binding receptor-like cytoplasmic kinase 1
AT5G59430	NA	NA	NA	NA	3	1.63e-05	TRP1	telomeric repeat binding protein 1
AT5G59540	NA	NA	NA	NA	2	3.34e-05	AT5G59540	2-oxoglutarate (2OG) and Fe(II)-dependent oxygenase superfamily protein
AT5G59850	NA	NA	NA	NA	1	0	AT5G59850	Ribosomal protein S8 family protein
AT5G60390	NA	NA	NA	NA	2	1.48e-05	AT5G60390	GTP binding Elongation factor Tu family protein
AT5G60700	NA	NA	NA	NA	3	4.18e-05	AT5G60700	glycosyltransferase family protein 2
AT5G60950	NA	NA	2	0.00037551	NA	NA	COBL5	COBRA-like protein 5 precursor
AT5G61780	NA	NA	NA	NA	3	3.76e-05	Tudor2	TUDOR-SN protein 2
AT5G61790	NA	NA	NA	NA	5	0.0001454	CNX1	calnexin 1
AT5G61900	NA	NA	NA	NA	1	0	BON1	Calcium-dependent phospholipid-binding Copine family protein
AT5G62020	NA	NA	NA	NA	1	0	HSFB2A	heat shock transcription factor B2A
AT5G62180	NA	NA	1	0	6	0.00021495	CXE20	carboxyesterase 20
AT5G63880	NA	NA	NA	NA	4	9.56e-05	VPS20.1	SNF7 family protein
AT5G63980	NA	NA	NA	NA	5	0.00012719	SAL1	SAL1 phosphatase-like protein
AT5G64230	NA	NA	NA	NA	2	1.82e-05	AT5G64230	1,8-cineole synthase
AT5G64250	NA	NA	1	0	9	0.00022116	AT5G64250	Aldolase-type TIM barrel family protein
AT5G64310	NA	NA	NA	NA	3	4.65e-05	AGP1	arabinogalactan protein 1
AT5G64370	NA	NA	NA	NA	3	4.76e-05	BETA-UP	beta-ureidopropionase
AT5G64400	NA	NA	NA	NA	3	3.79e-05	AT5G64400	CHCH domain protein
AT5G64700	NA	NA	NA	NA	1	0	UMAMIT21	nodulin MtN21 /EamA-like transporter family protein
AT5G64790	NA	NA	NA	NA	3	5.03e-05	AT5G64790	O-Glycosyl hydrolases family 17 protein
AT5G64810	NA	NA	2	0.00037551	NA	NA	WRKY51	WRKY DNA-binding protein 51
AT5G64870	NA	NA	NA	NA	1	0	AT5G64870	SPFH/Band 7/PHB domain-containing membrane-associated protein family
AT5G64890	NA	NA	1	0	3	4e-05	PROPEP2	elicitor peptide 2 precursor
AT5G64900	NA	NA	NA	NA	8	0.00024486	PROPEP1	precursor of peptide 1
AT5G64905	NA	NA	1	0	NA	NA	PROPEP3	elicitor peptide 3 precursor
AT5G65110	NA	NA	NA	NA	1	0	ACX2	acyl-CoA oxidase 2
AT5G65200	NA	NA	1	0	NA	NA	PUB38	plant U-box 38
AT5G65270	NA	NA	NA	NA	2	1.61e-05	RABA4a	RAB GTPase homolog A4A
AT5G65600	NA	NA	NA	NA	4	0.00012581	AT5G65600	Concanavalin A-like lectin protein kinase family protein
AT5G66120	NA	NA	NA	NA	9	0.00025872	AT5G66120	3-dehydroquinate synthase
AT5G66760	NA	NA	NA	NA	7	0.00029364	SDH1-1	succinate dehydrogenase 1-1
AT5G66890	NA	NA	3	0.00214403	1	0	AT5G66890	Leucine-rich repeat (LRR) family protein
AT5G67250	NA	NA	NA	NA	1	0	SKIP2	SKP1/ASK1-interacting protein 2
AT5G67300	NA	NA	NA	NA	1	0	MYBR1	myb domain protein r1
AT5G67350	NA	NA	NA	NA	6	0.000255	AT5G67350	hypothetical protein
AT5G67450	NA	NA	1	0	NA	NA	ZF1	zinc-finger protein 1
AT5G67510	NA	NA	NA	NA	1	0	AT5G67510	Translation protein SH3-like family protein
AT5G67540	NA	NA	1	0	NA	NA	AT5G67540	Arabinanase/levansucrase/invertase
AT5G67600	NA	NA	1	0	3	3.3e-05	WIH1	cysteine-rich TM module stress tolerance protein
Bcin01g05770.1	NA	NA	NA	NA	44	0.00013399	hypothetical protein BC1G_00442	P:metabolic process; F:hydrolase activity
Bcin01g05890.1	NA	NA	NA	NA	20	2.31e-05
Bcin01g11220.1	NA	NA	NA	NA	26	5.77e-05
Bcin02g05100.1	NA	NA	NA	NA	29	0.00011631	copper amine oxidase [Botrytis cinerea T4]	F:oxidoreductase activity; F:ion binding
Bcin02g09050.1	NA	NA	NA	NA	3	3.1e-07
Bcin02g09250.1	NA	NA	NA	NA	2	4.9e-07	ammecr1 family [Botrytis cinerea 1]	no GO terms
Bcin03g00480.1	NA	NA	1	0	NA	NA	Full=Endo-1,4-beta-xylanase 11A	P:carbohydrate metabolic process; P:catabolic process; P:cell wall organization or biogenesis; C:extracellular region; F:hydrolase activity, acting on glycosyl bonds
Bcin03g00500.1	NA	NA	NA	NA	46	0.00023273
Bcin03g02370.1	NA	NA	1	0	NA	NA	membrane biogenesis Yop1 [Botrytis cinerea T4]	C:cellular_component
Bcin05g02850.1	NA	NA	NA	NA	1	0	hypothetical protein BC1G_01557	no GO terms
Bcin05g03680.1	NA	NA	16	0.00157086	12	8.43e-06	[Botrytis cinerea ]	no GO terms
Bcin05g04810.1	NA	NA	NA	NA	2	2.5e-07	[Botrytis cinerea ]	no GO terms
Bcin05g06830.1	NA	NA	4	6.01e-05	NA	NA	chitin binding [Botrytis cinerea 1]	no GO terms
Bcin05g07430.1	NA	NA	1	0	NA	NA	acetyl-coa acetyltransferase [Botrytis cinerea T4]	F:transferase activity, transferring acyl groups other than amino-acyl groups; F:catalytic activity; P:metabolic process; F:transferase activity
Bcin06g00026.1	NA	NA	13	0.00428986	1	0	riboflavin transporter mch5	P:transmembrane transport; C:cellular_component
Bcin06g01600.1	NA	NA	NA	NA	5	4.88e-06	glycosyl hydrolase family 43 [Botrytis cinerea 1]	P:carbohydrate metabolic process; F:hydrolase activity, acting on glycosyl bonds
Bcin06g03950.1	NA	NA	1	0	NA	NA	hypothetical protein BC1G_05633 [Botrytis cinerea B05.10]	no GO terms
Bcin06g04940.1	NA	NA	NA	NA	7	2.25e-06	retinol dehydrogenase 8	no GO terms
Bcin06g06150.1	NA	NA	1	0	NA	NA	[Botrytis cinerea ]	no GO terms
Bcin07g04570.1	NA	NA	NA	NA	12	6.97e-06
Bcin08g00720.1	NA	NA	1	0	1	0	pepsin [Botrytis cinerea T4]	F:peptidase activity
Bcin08g03710.1	NA	NA	6	0.00026487	NA	NA		F:oxidoreductase activity; P:oxidation-reduction process
Bcin09g01440.1	NA	NA	1	0	NA	NA		P:signal transduction; P:regulation of GTPase activity
Bcin11g00330.1	NA	NA	1	0	NA	NA	hydroxymethylglutaryl- synthase	P:isoprenoid biosynthetic process; F:hydroxymethylglutaryl-CoA synthase activity
Bcin12g00300.1	NA	NA	6	0.00402057	213	0.0073314	glycoside hydrolase family 35 [Botrytis cinerea T4]	P:carbohydrate metabolic process; F:hydrolase activity, hydrolyzing O-glycosyl compounds
Bcin12g01780.1	NA	NA	NA	NA	21	4.79e-05	isopentenyl-diphosphate delta-isomerase [Botrytis cinerea 1]	F:isopentenyl-diphosphate delta-isomerase activity; P:isoprenoid biosynthetic process; F:hydrolase activity
Bcin12g03650.1	NA	NA	NA	NA	208	0.00683834	aryl-alcohol dehydrogenase [Botrytis cinerea T4]	no GO terms
Bcin12g06180.1	NA	NA	51	0.0534928	18	1.91e-05	cyanide hydratase [Botrytis cinerea ]	F:hydrolase activity, acting on carbon-nitrogen (but not peptide) bonds; P:nitrogen compound metabolic process
Bcin12g06410.1	NA	NA	NA	NA	19	2.42e-05	BcBOT5,BCL5p	F:transferase activity, transferring acyl groups
Bcin12g06630.1	NA	NA	32	0.00912587	9	6.09e-06	glycoside hydrolase family 45 [Botrytis cinerea T4]	P:carbohydrate metabolic process; F:cellulase activity
Bcin13g00010.1	NA	NA	NA	NA	1	0	hypothetical protein BC1G_15526	F:iron ion binding; F:oxidoreductase activity, acting on paired donors, with incorporation or reduction of molecular oxygen; P:oxidation-reduction process; F:monooxygenase activity; F:heme binding
Bcin13g00300.1	NA	NA	4	8.39e-05	7	3.44e-06	hypothetical protein BcDW1_977	no GO terms
Bcin14g00860.1	NA	NA	7	0.0001263	NA	NA	carbohydrate esterase family 8 [Botrytis cinerea T4]	P:carbohydrate metabolic process; P:catabolic process; C:cell wall; P:cell wall organization or biogenesis; C:extracellular region; F:molecular_function
Bcin15g03870.1	NA	NA	5	0.00011029	NA	NA	[Botrytis cinerea ]	P:carbohydrate metabolic process; C:extracellular region; F:hydrolase activity, acting on glycosyl bonds
Bcin15g04480.1	NA	NA	NA	NA	1	0
Bcin16g03870.1	NA	NA	NA	NA	16	1.54e-05	zinc-binding alcohol dehydrogenase [Botrytis cinerea T4]
