# Supplementary material for: Plant–necrotroph co-transcriptome networks illuminate a metabolic battlefield
Source: eLife journal article supplement (doi:10.7554/elife.44279), 2019-05-13
Supplement: supp [file elife_poa_e44279_Figure_2_source_data_3.xlsx]

## Sheet: F3_SD3_Significance
Figure 3-source data 3. GLM deviance tables and broad-sense heritability of B. cinerea transcripts. Summary of deviance tables derived from generalized linear model and estimated broad-sense heritability (H2) for B. cinerea transcripts. All significance values are corrected by false discovery rate.
	Experiment_Df	Experiment_Deviance	Experiment_Resid..Df	Experiment_Resid..Dev	Experiment_Pr..Chi.	Experiment.GrowingFlat_Df	Experiment.GrowingFlat_Deviance	Experiment.GrowingFlat_Resid..Df	Experiment.GrowingFlat_Resid..Dev	Experiment.GrowingFlat_Pr..Chi.	Experiment.GrowingFlat.AgarFlat_Df	Experiment.GrowingFlat.AgarFlat_Deviance	Experiment.GrowingFlat.AgarFlat_Resid..Df	Experiment.GrowingFlat.AgarFlat_Resid..Dev	Experiment.GrowingFlat.AgarFlat_Pr..Chi.	Isolate_Df	Isolate_Deviance	Isolate_Resid..Df	Isolate_Resid..Dev	Isolate_Pr..Chi.	HostGenotype_Df	HostGenotype_Deviance	HostGenotype_Resid..Df	HostGenotype_Resid..Dev	HostGenotype_Pr..Chi.	Isolate.HostGenotype_Df	Isolate.HostGenotype_Deviance	Isolate.HostGenotype_Resid..Df	Isolate.HostGenotype_Resid..Dev	Isolate.HostGenotype_Pr..Chi.	NULL_Df	NULL_Deviance	NULL_Resid..Df	NULL_Resid..Dev	NULL_Pr..Chi.	Heri.Isolate	Heri.HostGenotype	Heri.HostGenotype.Isolate	Description	GO terms
Bcin01g00010.1	1	129.015	1085	3274.57	7.88052e-29	2	286.749	985	1764.72	2.64444e-60	12	171.241	781	1174.2	1.51573e-28	96	1193.41	989	2081.17	5.52148e-187	2	29.6975	987	2051.47	1.35729e-06	192	419.284	793	1345.44	9.79136e-17	NA	NA	1086	3403.59	NA	0.257939	0.00641874	0.0906228
Bcin01g00020.1	1	114.394	1085	2815.83	1.05513e-25	2	202.396	985	1543.29	9.14349e-43	12	117.613	781	1082.31	2.80628e-18	96	1003.4	989	1812.44	1.66039e-149	2	66.7494	987	1745.69	3.60007e-14	192	343.363	793	1199.93	3.83398e-09	NA	NA	1086	2930.23	NA	0.250826	0.0166858	0.0858328
Bcin01g00030.1	1	193.519	1085	3351.46	1.24619e-42	2	250.448	985	1881.46	9.58508e-53	12	172.787	781	1227.27	7.64236e-29	96	1187.24	989	2164.22	9.06796e-186	2	32.3093	987	2131.91	4.00293e-07	192	481.401	793	1400.06	2.77825e-24	NA	NA	1086	3544.98	NA	0.249184	0.00678122	0.101039
Bcin01g00040.1	1	172.913	1085	3136.91	3.1748e-38	2	217.947	985	1773.22	5.08945e-46	12	138.232	781	1165.82	3.30124e-22	96	1106.35	989	2030.56	9.54449e-170	2	39.3972	987	1991.16	1.44992e-08	192	469.162	793	1304.05	9.38473e-23	NA	NA	1086	3309.82	NA	0.248307	0.00884224	0.105298
Bcin01g00050.1	1	92.1682	1085	2653.44	5.94156e-21	2	148.526	985	1495.5	1.85619e-31	12	80.0237	781	1110.75	2.41996e-11	96	983.19	989	1670.25	1.5046e-145	2	26.2245	987	1644.02	6.8504e-06	192	304.717	793	1190.78	3.63109e-06	NA	NA	1086	2745.6	NA	0.261834	0.00698386	0.0811494
Bcin01g00060.1	1	146.026	1085	3485.85	1.82212e-32	2	243.892	985	1819.2	2.31128e-51	12	152.098	781	1153.34	7.31416e-25	96	1365.44	989	2120.41	2.09024e-221	2	57.3146	987	2063.09	3.16544e-12	192	513.764	793	1305.44	1.92535e-28	NA	NA	1086	3631.88	NA	0.270137	0.011339	0.101642
Bcin01g00070.1	1	164.053	1085	3518.4	2.50896e-36	2	229.086	985	1681.23	2.47288e-48	12	107.956	781	1085.52	1.83628e-16	96	1569.02	989	1949.38	1.42999e-262	2	39.062	987	1910.31	1.69735e-08	192	487.75	793	1193.48	5.14432e-25	NA	NA	1086	3682.45	NA	0.296572	0.00738337	0.0921928
Bcin01g00080.1	1	208.786	1085	3006.32	6.88236e-46	2	234.152	985	1680.17	2.40924e-49	12	147.843	781	1139.32	4.67837e-24	96	1055.76	989	1950.56	9.07777e-160	2	36.2344	987	1914.32	6.39984e-08	192	393.011	793	1287.16	8.21879e-14	NA	NA	1086	3215.11	NA	0.245121	0.0084127	0.091247
Bcin01g00090.1	1	144.203	1085	3397.22	4.49269e-32	2	255.606	985	1797.84	8.62007e-54	12	160.178	781	1196.33	1.92533e-26	96	1275.6	989	2121.62	2.24741e-203	2	68.1725	987	2053.45	1.85005e-14	192	441.337	793	1356.51	2.59279e-19	NA	NA	1086	3541.42	NA	0.261115	0.0139549	0.0903419
Bcin01g00100.1	1	102.325	1085	2903.51	3.93706e-23	2	211.358	985	1521.56	1.24196e-44	12	103.444	781	1095.64	1.25016e-15	96	1153.83	989	1749.68	3.84778e-179	2	16.7645	987	1732.92	0.000540861	192	322.481	793	1199.08	1.88415e-07	NA	NA	1086	3005.84	NA	0.276272	0.00401407	0.0772144
Bcin01g00110.1	1	78.8883	1085	2801.15	4.134e-18	2	154.467	985	1509.39	1.02114e-32	12	90.6801	781	1104.35	2.80418e-13	96	1116.55	989	1684.6	9.23231e-172	2	20.7468	987	1663.86	8.7131e-05	192	314.359	793	1195.03	7.41982e-07	NA	NA	1086	2880.04	NA	0.277933	0.00516433	0.0782507
Bcin01g00120.1	1	137.786	1085	3012.14	1.06875e-30	2	240.732	985	1568.23	1.00738e-50	12	106.481	781	1134.39	3.43939e-16	96	1174.01	989	1838.14	3.90736e-183	2	29.176	987	1808.96	1.73197e-06	192	327.359	793	1240.87	7.88494e-08	NA	NA	1086	3149.93	NA	0.269694	0.00670232	0.0752011
Bcin01g00130.1	1	448.613	1085	2858.22	3.8338e-97	2	183.617	985	1696.87	7.84168e-39	12	142.971	781	1214.06	4.01195e-23	96	918.097	989	1940.12	6.88297e-133	2	59.631	987	1880.49	1.0749e-12	192	339.841	793	1357.03	7.4304e-09	NA	NA	1086	3306.83	NA	0.21428	0.0139176	0.0793176
Bcin01g00140.1	1	35.4729	1085	1387.69	8.59975e-09	2	8.9432	985	1049.11	0.0180793	12	38.6878	781	851.671	0.000256217	96	324.504	989	1063.19	3.07578e-26	2	5.13325	987	1058.06	0.103733	192	158.755	793	890.359	1	NA	NA	1086	1423.17	NA	0.185134	0.00292859	0.0905721
Bcin01g00160.1	1	49.4017	1085	3792.93	8.59053e-12	2	22.8853	985	1191.45	2.7499e-05	12	9.53718	781	836.48	0.678489	96	2527.43	989	1265.5	0	2	51.1694	987	1214.33	5.59594e-11	192	345.429	793	846.017	2.58818e-09	NA	NA	1086	3842.33	NA	0.393623	0.00796916	0.0537974		no GO terms
Bcin01g00170.1	1	95.0794	1085	2653.65	1.41979e-21	2	158.293	985	1761.1	1.58631e-33	12	125.727	781	1177.01	8.13669e-20	96	733.006	989	1920.64	1.53905e-97	2	1.24785	987	1919.39	0.578187	192	458.36	793	1302.74	2.16072e-21	NA	NA	1086	2748.73	NA	0.210454	0.00035827	0.1316
Bcin01g00180.1	1	9.45432	1085	1509.55	0.00376964	2	30.5546	985	1246.21	7.47284e-07	12	18.8495	781	992.122	0.115893	96	226.897	989	1282.65	1.92509e-12	2	5.88555	987	1276.77	0.0741246	192	235.243	793	1010.97	0.0313317	NA	NA	1086	1519.01	NA	0.129523	0.00335974	0.134287
Bcin01g00190.1	1	38.2461	1085	1865.4	2.16518e-09	2	42.9592	985	1522.32	2.03633e-09	12	74.7929	781	1210.38	2.10419e-10	96	268.243	989	1597.16	5.59451e-18	2	31.879	987	1565.28	4.89171e-07	192	237.145	793	1285.17	0.0260485	NA	NA	1086	1903.65	NA	0.12172	0.0144657	0.107609
Bcin01g00200.1	1	0.779788	1085	1923.41	0.438241	2	26.0745	985	1500.51	6.18465e-06	12	50.2894	781	1224.34	3.61213e-06	96	368.828	989	1554.58	3.63218e-33	2	27.9909	987	1526.59	3.00581e-06	192	225.883	793	1274.63	0.0736172	NA	NA	1086	1924.19	NA	0.158909	0.0120598	0.0973213
Bcin01g00210.1	1	0.459712	1085	1799.73	0.555565	2	7.97757	985	1497.45	0.0280601	12	16.6468	781	1201.25	0.193636	96	290.845	989	1508.88	3.26646e-21	2	3.45791	987	1505.42	0.218494	192	279.548	793	1217.9	0.000157584	NA	NA	1086	1800.19	NA	0.138862	0.00165095	0.133468
Bcin01g00220.1	1	13.5799	1085	1962.87	0.000468857	2	35.6923	985	1384.48	6.48225e-08	12	23.1215	781	1137.24	0.0376206	96	399.357	989	1563.51	4.1326e-38	2	143.337	987	1420.18	5.27098e-30	192	224.125	793	1160.36	0.0853434	NA	NA	1086	1976.45	NA	0.158529	0.0568992	0.0889686
Bcin01g00230.1	1	3.19745	1085	1974.17	0.101037	2	43.3603	985	1523.65	1.68278e-09	12	58.7263	781	1222.82	1.36275e-07	96	399.608	989	1574.56	3.75653e-38	2	7.5454	987	1567.01	0.0351859	192	242.104	793	1281.55	0.0156837	NA	NA	1086	1977.36	NA	0.167584	0.00316433	0.101532
Bcin01g00250.1	1	3.72965	1085	1484.48	0.0753299	2	0.0998358	985	1251.85	0.956459	12	5.71007	781	1015.67	0.934099	96	222.078	989	1262.4	7.78235e-12	2	10.4544	987	1251.95	0.00954642	192	230.465	793	1021.38	0.0492653	NA	NA	1086	1488.21	NA	0.12906	0.00607551	0.133934
Bcin01g00260.1	1	26.0617	1085	2329.43	9.05357e-07	2	43.9417	985	1549.7	1.27332e-09	12	93.5516	781	1133.95	8.39574e-14	96	689.281	989	1640.15	2.34408e-89	2	46.5066	987	1593.64	5.11071e-10	192	322.193	793	1227.51	1.97603e-07	NA	NA	1086	2355.49	NA	0.222976	0.0150445	0.104227
Bcin01g00270.1	1	5.07021	1085	1586.31	0.036554	2	17.8232	985	1372.16	0.00029692	12	15.1994	781	1119.61	0.264337	96	182.988	989	1403.32	2.75528e-07	2	13.3376	987	1389.99	0.00256353	192	237.35	793	1134.81	0.0254874	NA	NA	1086	1591.38	NA	0.102359	0.00746076	0.132768
Bcin01g00280.1	1	21.8069	1085	1784.92	7.55108e-06	2	39.7651	985	1489.33	9.28395e-09	12	55.7809	781	1172.64	4.3518e-07	96	239.238	989	1545.68	4.89284e-14	2	16.5792	987	1529.1	0.00058858	192	260.91	793	1228.42	0.0018381	NA	NA	1086	1806.72	NA	0.115992	0.00803824	0.126499
Bcin01g00290.1	1	12.8683	1085	956.905	0.000671137	2	4.94584	985	819.654	0.109525	12	6.90665	781	660.403	0.871228	96	116.286	989	840.62	0.0811255	2	16.0195	987	824.6	0.000760223	192	152.345	793	667.309	1	NA	NA	1086	969.774	NA	0.105515	0.0145357	0.138234
Bcin01g00300.1	1	7.6294	1085	833.147	0.00953717	2	21.8178	985	608.46	4.55228e-05	12	13.3305	781	460.722	0.37949	96	186.439	989	646.708	1.17271e-07	2	16.4303	987	630.278	0.000627897	192	134.407	793	474.053	1	NA	NA	1086	840.777	NA	0.178642	0.0157431	0.128786
Bcin01g00330.1	1	21.9931	1085	2206.61	6.87338e-06	2	106.306	985	1613.3	1.25238e-22	12	89.7667	781	1258.69	4.13848e-13	96	450.33	989	1756.28	1.31319e-46	2	36.6705	987	1719.61	5.25022e-08	192	264.851	793	1348.45	0.00113029	NA	NA	1086	2228.6	NA	0.165831	0.0135036	0.0975293
Bcin01g00340.1	1	56.6323	1085	2056.49	2.40529e-13	2	45.3114	985	1482.63	6.60916e-10	12	79.6298	781	1179.77	2.84785e-11	96	438.919	989	1617.57	1.11166e-44	2	89.6287	987	1527.94	7.28865e-19	192	223.234	793	1259.4	0.0918397	NA	NA	1086	2113.12	NA	0.166152	0.0339288	0.084505
Bcin01g00350.1	1	10.6287	1085	2205	0.00207826	2	3.03437	985	1540.77	0.25913	12	105.659	781	1161	4.8084e-16	96	578.387	989	1626.61	5.0231e-69	2	82.805	987	1543.81	1.87298e-17	192	274.117	793	1266.66	0.000333106	NA	NA	1086	2215.63	NA	0.201051	0.0287835	0.0952846
Bcin01g00360.1	1	0.0664483	1085	2182.48	0.828065	2	29.2518	985	1457.64	1.38214e-06	12	28.944	781	1100.65	0.00662257	96	676.761	989	1505.72	4.97493e-87	2	18.8276	987	1486.89	0.000210705	192	328.047	793	1129.6	6.94171e-08	NA	NA	1086	2182.55	NA	0.235139	0.0065416	0.113979
Bcin01g00370.1	1	219.601	1085	2089.06	3.2885e-48	2	32.2577	985	1497.87	3.33257e-07	12	54.0892	781	1188.95	8.39853e-07	96	549.225	989	1539.83	8.29725e-64	2	9.70523	987	1530.13	0.0133768	192	254.835	793	1243.04	0.0038226	NA	NA	1086	2308.66	NA	0.191528	0.00338446	0.0888674
Bcin01g00380.1	1	40.8785	1085	1637.79	5.90718e-10	2	10.1296	985	1352.47	0.0104526	12	19.3103	781	1099.48	0.103295	96	262.285	989	1375.51	3.77651e-17	2	12.9042	987	1362.6	0.00311418	192	233.685	793	1118.79	0.0365259	NA	NA	1086	1678.67	NA	0.13424	0.00660447	0.119602
Bcin01g00390.1	1	1.51401	1085	2099.82	0.269216	2	29.2889	985	1622.44	1.35995e-06	12	102.77	781	1234.08	1.67327e-15	96	368.754	989	1731.06	3.7278e-33	2	79.3337	987	1651.73	9.58818e-17	192	285.59	793	1336.85	6.63297e-05	NA	NA	1086	2101.33	NA	0.144642	0.0311184	0.112022
Bcin01g00400.1	1	8.93955	1085	1999.38	0.00487451	2	93.4306	985	1565.69	6.08306e-20	12	83.2107	781	1236.06	6.48996e-12	96	323.875	989	1675.51	3.83403e-26	2	16.3907	987	1659.12	0.000639972	192	246.415	793	1319.27	0.00998119	NA	NA	1086	2008.32	NA	0.137902	0.00697895	0.104921
Bcin01g00410.1	1	108.139	1085	1888.84	2.2632e-24	2	63.7902	985	1474.18	9.40101e-14	12	71.5486	781	1205.35	7.8533e-10	96	343.336	989	1545.5	3.81143e-29	2	7.531	987	1537.97	0.0354286	192	197.286	793	1276.9	0.474279	NA	NA	1086	1996.98	NA	0.146234	0.00320762	0.0840285
Bcin01g00420.1	1	227.866	1085	2299.36	5.61237e-50	2	128.047	985	1599.98	3.59109e-27	12	151.883	781	1182.93	8.05776e-25	96	563.56	989	1735.8	2.30757e-66	2	7.77366	987	1728.03	0.0318424	192	265.164	793	1334.82	0.00108779	NA	NA	1086	2527.23	NA	0.181878	0.0025088	0.0855764
Bcin01g00430.1	1	22.6177	1085	1529.78	5.02879e-06	2	8.86716	985	1287.61	0.0187192	12	30.0454	781	1080.57	0.00465783	96	211.148	989	1318.63	1.70937e-10	2	22.1547	987	1296.47	4.51164e-05	192	176.991	793	1110.62	0.875425	NA	NA	1086	1552.39	NA	0.118244	0.0124068	0.0991158
Bcin01g00430.2	1	26.7867	1085	1548.02	6.3095e-07	2	5.73431	985	1293.77	0.0768772	12	29.5121	781	1080.97	0.00551987	96	233.659	989	1314.36	2.61588e-13	2	14.8508	987	1299.51	0.00129565	192	183.287	793	1110.48	0.769232	NA	NA	1086	1574.8	NA	0.128151	0.00814499	0.100524
Bcin01g00440.1	1	38.2492	1085	2967.58	2.16253e-09	2	136.729	985	1624.3	5.44189e-29	12	87.4288	781	1155.62	1.11485e-12	96	1198.69	989	1768.89	4.98553e-188	2	7.86686	987	1761.02	0.0305407	192	381.249	793	1243.05	1.19864e-12	NA	NA	1086	3005.83	NA	0.284563	0.00186756	0.0905069
Bcin01g00450.1	1	96.086	1085	1993.03	8.60371e-22	2	52.4197	985	1422.5	2.2164e-11	12	79.1351	781	1152.75	3.48302e-11	96	457.35	989	1535.68	8.49381e-48	2	60.7575	987	1474.92	6.32832e-13	192	190.618	793	1231.88	0.618466	NA	NA	1086	2089.11	NA	0.175417	0.0233035	0.0731116
Bcin01g00460.1	1	9.18036	1085	2116.27	0.00431277	2	108.885	985	1641.58	3.62082e-23	12	83.3521	781	1254.16	6.11867e-12	96	350.07	989	1766.2	3.3698e-30	2	15.7323	987	1750.46	0.000868639	192	304.064	793	1337.52	4.01311e-06	NA	NA	1086	2125.45	NA	0.14052	0.00631501	0.122053
Bcin01g00470.1	1	74.2421	1085	2065.22	4.07322e-17	2	107.147	985	1516.74	8.30341e-23	12	90.4122	781	1221.26	3.13677e-13	96	418.18	989	1647.04	3.24293e-41	2	23.1569	987	1623.88	2.83041e-05	192	205.068	793	1311.67	0.320092	NA	NA	1086	2139.46	NA	0.162035	0.00897277	0.079459
Bcin01g00480.1	1	125.065	1085	1990.93	5.50183e-28	2	2.13654	985	1509.69	0.388599	12	44.334	781	1157.85	3.36649e-05	96	441.845	989	1549.08	3.55911e-45	2	37.2503	987	1511.83	3.99965e-08	192	307.51	793	1202.18	2.29981e-06	NA	NA	1086	2115.99	NA	0.170262	0.0143542	0.118497
Bcin01g00490.1	1	26.2779	1085	1479.91	8.13785e-07	2	14.194	985	1249.68	0.00160333	12	18.0518	781	997.499	0.140824	96	188.989	989	1290.92	6.18166e-08	2	27.0392	987	1263.88	4.68152e-06	192	234.134	793	1015.55	0.0349695	NA	NA	1086	1506.18	NA	0.109736	0.0157003	0.135949
Bcin01g00500.1	1	35.9922	1085	1719.01	6.64703e-09	2	2.93118	985	1494.9	0.271331	12	27.9531	781	1215.32	0.00903041	96	219.575	989	1499.43	1.59253e-11	2	1.60296	987	1497.83	0.494997	192	251.627	793	1243.27	0.00554135	NA	NA	1086	1755	NA	0.111111	0.000811143	0.12733
Bcin01g00510.1	1	34.2331	1085	1915.31	1.59258e-08	2	34.0473	985	1607.41	1.42022e-07	12	33.7608	781	1288.41	0.00139105	96	246.064	989	1669.25	6.10588e-15	2	27.7986	987	1641.45	3.28377e-06	192	285.232	793	1322.17	6.96541e-05	NA	NA	1086	1949.55	NA	0.11067	0.0125027	0.128286
Bcin01g00520.1	1	66.0654	1085	1743.55	2.29446e-15	2	21.3061	985	1460.36	5.80799e-05	12	17.7153	781	1153.61	0.152184	96	214.164	989	1529.39	7.36373e-11	2	47.7189	987	1481.67	2.87707e-10	192	289.034	793	1171.33	3.99683e-05	NA	NA	1086	1809.62	NA	0.103386	0.023036	0.139529
Bcin01g00530.1	1	3.79397	1085	1806.37	0.0728078	2	9.01544	985	1494.2	0.0175035	12	10.4779	781	1230.71	0.599823	96	280.585	989	1525.79	9.95587e-20	2	22.5717	987	1503.22	3.72341e-05	192	253.012	793	1241.19	0.00474154	NA	NA	1086	1810.17	NA	0.13277	0.0106807	0.119722
Bcin01g00540.1	1	78.8832	1085	1935.87	4.14173e-18	2	13.325	985	1466.25	0.00240074	12	12.8224	781	1166.64	0.415276	96	375.03	989	1560.84	3.67115e-34	2	81.261	987	1479.58	3.87378e-17	192	286.789	793	1179.46	5.55727e-05	NA	NA	1086	2014.75	NA	0.15177	0.0328853	0.11606
Bcin01g00550.1	1	2.16463	1085	2188.91	0.181892	2	24.2535	985	1654.5	1.45028e-05	12	91.6891	781	1275.06	1.83275e-13	96	425.889	989	1763.03	1.69448e-42	2	84.2746	987	1678.75	9.3249e-18	192	287.752	793	1366.75	4.8288e-05	NA	NA	1086	2191.08	NA	0.157664	0.0311984	0.106526
Bcin01g00560.1	1	5.19449	1085	1658.39	0.0341886	2	1.15583	985	1416.09	0.599488	12	17.3007	781	1110.74	0.167476	96	220.085	989	1438.31	1.3772e-11	2	21.0562	987	1417.25	7.54273e-05	192	288.051	793	1128.04	4.62286e-05	NA	NA	1086	1663.58	NA	0.115547	0.0110547	0.15123
Bcin01g00570.1	1	12.7531	1085	1842.77	0.00071176	2	6.47966	985	1526.65	0.0551165	12	25.0107	781	1196.01	0.0219716	96	305.057	989	1537.71	2.63389e-23	2	4.58703	987	1533.13	0.131971	192	305.626	793	1221.02	3.13732e-06	NA	NA	1086	1855.52	NA	0.140893	0.00211856	0.141156
Bcin01g00590.1	1	0.97754	1085	1340.99	0.381581	2	0.0434442	985	1206.57	0.98073	12	16.2211	781	1025.64	0.212274	96	133.102	989	1207.88	0.00793625	2	1.27097	987	1206.61	0.572271	192	164.705	793	1041.86	1	NA	NA	1086	1341.96	NA	0.0901568	0.000860897	0.111564
Bcin01g00610.1	1	36.2352	1085	1539.2	5.89535e-09	2	16.4922	985	1298.89	0.000551652	12	25.9357	781	1072.07	0.0167014	96	217.751	989	1321.45	2.67641e-11	2	6.06912	987	1315.38	0.0683382	192	200.884	793	1098	0.399868	NA	NA	1086	1575.43	NA	0.121023	0.00337313	0.111649
Bcin01g00620.1	1	6.22883	1085	940.645	0.0198112	2	8.90984	985	784.433	0.0183615	12	22.1783	781	615.451	0.0487131	96	145.886	989	794.759	0.000875199	2	1.41625	987	793.343	0.537022	192	146.804	793	637.629	1	NA	NA	1086	946.874	NA	0.133329	0.00129436	0.134168
Bcin01g00630.1	1	3.37045	1085	1744.37	0.0919883	2	13.2981	985	1420.15	0.00243084	12	18.1163	781	1170.79	0.138673	96	302.545	989	1441.83	6.21065e-23	2	8.37981	987	1433.45	0.0242887	192	231.241	793	1188.91	0.0459678	NA	NA	1086	1747.74	NA	0.146961	0.0040705	0.112326
Bcin01g00640.1	1	168.018	1085	2042.99	3.5386e-37	2	67.5183	985	1491.57	1.59283e-14	12	55.6908	781	1145.27	4.5091e-07	96	476.552	989	1566.44	4.39896e-51	2	7.34313	987	1559.09	0.0385054	192	290.611	793	1200.96	3.18444e-05	NA	NA	1086	2211	NA	0.176835	0.00272482	0.107837
Bcin01g00650.1	1	3.56344	1085	1760.6	0.0826221	2	0.521245	985	1444.62	0.794358	12	23.3891	781	1187.88	0.034877	96	311.572	989	1449.03	2.80012e-24	2	3.89311	987	1445.14	0.179671	192	233.351	793	1211.27	0.037742	NA	NA	1086	1764.17	NA	0.149821	0.00187202	0.112208
Bcin01g00660.1	1	90.9433	1085	2172.5	1.09026e-20	2	122.346	985	1566.75	5.56624e-26	12	50.6924	781	1234.92	3.11153e-06	96	481.272	989	1691.23	6.75116e-52	2	2.13425	987	1689.09	0.392697	192	281.134	793	1285.61	0.000125533	NA	NA	1086	2263.44	NA	0.175209	0.00077698	0.102348
Bcin01g00670.1	1	176.797	1085	2066.61	4.7517e-39	2	12.3736	985	1542.5	0.00374278	12	62.6937	781	1182.86	2.81808e-08	96	511.034	989	1555.58	4.55827e-57	2	0.708737	987	1554.87	0.734198	192	296.944	793	1245.55	1.2253e-05	NA	NA	1086	2243.41	NA	0.185483	0.00025724	0.107778
Bcin01g00700.1	1	16.614	1085	2754.1	0.000101456	2	102.497	985	1629.71	7.79528e-22	12	81.6333	781	1205.01	1.24389e-11	96	1013.79	989	1740.31	1.55059e-151	2	8.10255	987	1732.21	0.0274687	192	343.068	793	1286.64	4.07076e-09	NA	NA	1086	2770.71	NA	0.267307	0.00213641	0.090457
Bcin01g00710.1	1	0.298357	1085	1127.55	0.637814	2	0.454913	985	862.543	0.817876	12	5.29874	781	688.376	0.950012	96	261.114	989	866.434	5.48627e-17	2	3.43576	987	862.998	0.220631	192	168.868	793	693.675	0.972805	NA	NA	1086	1127.85	NA	0.187529	0.00246751	0.121279
Bcin01g00720.1	1	0.044285	1085	2187.99	0.860098	2	97.0365	985	1602.23	1.06917e-20	12	127.079	781	1229.13	4.46797e-20	96	473.126	989	1714.86	1.70871e-50	2	15.6027	987	1699.26	0.000920038	192	246.018	793	1356.21	0.0104029	NA	NA	1086	2188.03	NA	0.176753	0.00582894	0.0919088
Bcin01g00730.1	1	34.814	1085	2138.25	1.19767e-08	2	112.473	985	1522.87	6.43998e-24	12	84.2468	781	1174.41	4.21477e-12	96	420.398	989	1717.85	1.39024e-41	2	82.5055	987	1635.34	2.15889e-17	192	264.216	793	1258.65	0.00122618	NA	NA	1086	2173.06	NA	0.157101	0.030832	0.0987369
Bcin01g00740.1	1	112.253	1085	2099.7	3.02295e-25	2	37.3357	985	1505.03	2.94867e-08	12	74.6696	781	1216.5	2.2139e-10	96	457.356	989	1642.35	8.47791e-48	2	99.9775	987	1542.37	5.17392e-21	192	213.866	793	1291.17	0.185684	NA	NA	1086	2211.95	NA	0.165153	0.0361023	0.0772277
Bcin01g00750.1	1	5.3106	1085	2304.06	0.0321543	2	176.498	985	1438.67	2.50371e-37	12	69.1204	781	1152.82	2.12016e-09	96	546.375	989	1757.69	2.6639e-63	2	142.515	987	1615.17	7.774e-30	192	216.729	793	1221.94	0.151463	NA	NA	1086	2309.37	NA	0.182231	0.0475326	0.0722848
Bcin01g00760.1	1	3.49073	1085	2685.75	0.0860476	2	109.447	985	1638.64	2.76204e-23	12	77.8992	781	1197.7	5.78744e-11	96	930.694	989	1755.05	2.49047e-135	2	6.96808	987	1748.08	0.0456072	192	363.038	793	1275.6	7.1794e-11	NA	NA	1086	2689.24	NA	0.256609	0.00192122	0.100096
Bcin01g00770.1	1	290.705	1085	1987.64	2.02581e-63	2	58.2188	985	1527.24	1.37992e-12	12	75.1384	781	1150.76	1.83109e-10	96	392.447	989	1595.19	5.56123e-37	2	9.73033	987	1585.46	0.0132149	192	301.348	793	1225.9	6.16061e-06	NA	NA	1086	2278.34	NA	0.146407	0.00363001	0.112421
Bcin01g00770.2	1	261.732	1085	1988.24	3.16564e-57	2	60.7915	985	1525.41	3.97599e-13	12	76.2946	781	1141.98	1.13538e-10	96	399.095	989	1589.15	4.56006e-38	2	2.9417	987	1586.21	0.275119	192	307.139	793	1218.28	2.45476e-06	NA	NA	1086	2249.98	NA	0.150488	0.00110923	0.115813
Bcin01g00780.1	1	7.00457	1085	2297.92	0.0132167	2	54.7858	985	1590.47	7.1788e-12	12	112.81	781	1178.09	2.24931e-17	96	608.211	989	1689.71	1.982e-74	2	44.4518	987	1645.26	1.34423e-09	192	299.577	793	1290.89	8.15779e-06	NA	NA	1086	2304.92	NA	0.205644	0.0150298	0.101291
Bcin01g00790.1	1	66.9009	1085	2313.58	1.51031e-15	2	52.2213	985	1709.09	2.42929e-11	12	174.05	781	1233.81	4.33293e-29	96	470.015	989	1843.56	5.85865e-50	2	82.2486	987	1761.31	2.44075e-17	192	301.235	793	1407.86	6.25154e-06	NA	NA	1086	2380.48	NA	0.160265	0.028045	0.102714
Bcin01g00800.1	1	37.5665	1085	2222	3.03564e-09	2	11.198	985	1657.35	0.00641495	12	160.619	781	1239.76	1.60912e-26	96	521.134	989	1700.87	7.74462e-59	2	32.3178	987	1668.55	3.9878e-07	192	256.981	793	1400.37	0.00295841	NA	NA	1086	2259.57	NA	0.185258	0.0114886	0.0913539
Bcin01g00810.1	1	114.531	1085	1815.52	9.8678e-26	2	3.99876	985	1573.5	0.168169	12	31.2563	781	1252.59	0.00316359	96	230.41	989	1585.11	6.85795e-13	2	7.61972	987	1577.49	0.0340936	192	289.65	793	1283.85	3.67113e-05	NA	NA	1086	1930.05	NA	0.106273	0.00351449	0.133597
Bcin01g00820.1	1	2.6591	1085	1296.75	0.136807	2	0.718004	985	1136.26	0.727932	12	16.4336	781	954.818	0.202802	96	147.816	989	1148.94	0.000609426	2	11.9523	987	1136.98	0.00484255	192	165.013	793	971.252	0.99957	NA	NA	1086	1299.41	NA	0.101301	0.00819109	0.113086
Bcin01g00830.1	1	2.04426	1085	2218.32	0.195186	2	15.6976	985	1585.63	0.00079638	12	109.437	781	1177.49	9.74086e-17	96	529.037	989	1689.28	3.14938e-60	2	87.9553	987	1601.33	1.62719e-18	192	298.705	793	1286.93	9.2808e-06	NA	NA	1086	2220.37	NA	0.186454	0.030999	0.105276
Bcin01g00840.1	1	8.18498	1085	1661.99	0.00717686	2	11.5381	985	1376.82	0.00548156	12	26.8141	781	1085.14	0.0128266	96	245.383	989	1416.6	7.52815e-15	2	28.243	987	1388.36	2.67263e-06	192	264.865	793	1111.96	0.00112864	NA	NA	1086	1670.17	NA	0.126239	0.0145298	0.136261
Bcin01g00850.1	1	19.5834	1085	1455.95	2.28662e-05	2	0.768122	985	1271.3	0.712052	12	16.8348	781	1066.99	0.18589	96	165.769	989	1290.18	1.52694e-05	2	18.1096	987	1272.07	0.000293073	192	187.48	793	1083.82	0.683302	NA	NA	1086	1475.53	NA	0.0998966	0.0109133	0.11298
Bcin01g00860.1	1	0.222112	1085	1216.01	0.687132	2	8.73758	985	1023.75	0.0198374	12	32.4865	781	781.265	0.00212394	96	169.362	989	1046.65	6.84548e-06	2	14.1604	987	1032.49	0.00176494	192	209.999	793	813.752	0.239546	NA	NA	1086	1216.23	NA	0.120994	0.0101164	0.150026
Bcin01g00870.1	1	107.835	1085	2432.19	2.62322e-24	2	136.151	985	1524.22	7.16439e-29	12	138.667	781	1153.33	2.71843e-22	96	769.048	989	1663.15	2.43718e-104	2	2.77579	987	1660.37	0.296215	192	232.227	793	1291.99	0.0420178	NA	NA	1086	2540.03	NA	0.232211	0.000838137	0.07012
Bcin01g00880.1	1	62.1608	1085	2128.98	1.57401e-14	2	137.443	985	1615.19	3.87616e-29	12	62.4688	781	1213.35	3.08513e-08	96	369.938	989	1759.05	2.41419e-33	2	6.41571	987	1752.63	0.0585309	192	339.371	793	1275.82	8.1286e-09	NA	NA	1086	2191.14	NA	0.144085	0.00249882	0.13218
Bcin01g00890.1	1	0.29968	1085	1522.97	0.637057	2	2.75514	985	1363.37	0.294248	12	24.2145	781	1116.73	0.0276811	96	144.187	989	1378.78	0.00119438	2	12.6565	987	1366.13	0.00349282	192	222.43	793	1140.94	0.0979773	NA	NA	1086	1523.27	NA	0.0858198	0.00753311	0.13239
Bcin01g00920.1	1	65.9971	1085	2175.75	2.37133e-15	2	38.0861	985	1560.52	2.06226e-08	12	132.002	781	1175.73	5.18348e-21	96	566.818	989	1608.93	6.01623e-67	2	10.33	987	1598.6	0.0101069	192	252.781	793	1307.74	0.00486509	NA	NA	1086	2241.75	NA	0.201078	0.00366454	0.0896736
Bcin01g00930.1	1	282.642	1085	1834.93	1.052e-61	2	1.01032	985	1414.59	0.638952	12	23.4103	781	1207.53	0.0346592	96	417.627	989	1417.3	4.01357e-41	2	1.70475	987	1415.6	0.473638	192	183.646	793	1230.94	0.762079	NA	NA	1086	2117.57	NA	0.164621	0.000671979	0.0723897
Bcin01g00940.1	1	13.3836	1085	2081.58	0.00051804	2	55.8035	985	1624.02	4.3907e-12	12	102.939	781	1225.53	1.55882e-15	96	391.872	989	1689.71	6.88923e-37	2	9.89069	987	1679.82	0.0123217	192	295.546	793	1328.47	1.50702e-05	NA	NA	1086	2094.97	NA	0.156954	0.00396146	0.118373
Bcin01g00940.2	1	4.02043	1085	2063.65	0.0641858	2	51.1786	985	1579.83	3.99786e-11	12	82.6141	781	1238.83	8.27187e-12	96	422.521	989	1641.13	6.16832e-42	2	10.1217	987	1631.01	0.0111083	192	258.381	793	1321.45	0.00250148	NA	NA	1086	2067.67	NA	0.168987	0.00404817	0.10334
Bcin01g00950.1	1	3.22267	1085	1018.18	0.0996969	2	29.6456	985	865.885	1.14935e-06	12	19.8342	781	675.702	0.0906066	96	114.395	989	903.783	0.100585	2	8.25316	987	895.53	0.025655	192	170.348	793	695.536	0.959344	NA	NA	1086	1021.4	NA	0.0999912	0.00721399	0.1489
Bcin01g00970.1	1	13.9578	1085	1086.58	0.000387878	2	10.7085	985	930.506	0.00802752	12	36.9052	781	738.674	0.00047772	96	143.269	989	943.316	0.00141098	2	2.10144	987	941.214	0.398292	192	154.926	793	775.58	1	NA	NA	1086	1100.54	NA	0.114991	0.00168667	0.124348
Bcin01g00980.1	1	191.225	1085	1962.01	3.87156e-42	2	50.1196	985	1506.43	6.64038e-11	12	65.8218	781	1148.55	7.99676e-09	96	391.861	989	1570.15	6.91552e-37	2	13.5994	987	1556.55	0.00227481	192	292.067	793	1214.37	2.56193e-05	NA	NA	1086	2153.24	NA	0.153149	0.00531498	0.114147
Bcin01g00990.1	1	3.32324	1085	926.181	0.0942994	2	3.11356	985	779.596	0.250152	12	13.3682	781	613.649	0.376832	96	125.204	989	800.978	0.0258284	2	18.2682	987	782.709	0.000272413	192	152.579	793	627.017	1	NA	NA	1086	929.505	NA	0.116688	0.0170257	0.142202
Bcin01g01000.1	1	22.024	1085	1471.59	6.77272e-06	2	1.57224	985	1213.52	0.499208	12	28.2783	781	987.328	0.00816806	96	250.043	989	1221.54	1.78435e-15	2	6.44951	987	1215.09	0.0576669	192	197.916	793	1015.61	0.461205	NA	NA	1086	1493.61	NA	0.142873	0.00368522	0.113088
Bcin01g01010.1	1	0.0372545	1085	2008.27	0.87135	2	3.19374	985	1521.37	0.241309	12	68.5758	781	1222.28	2.63404e-09	96	398.529	989	1609.74	5.63726e-38	2	85.1747	987	1524.57	6.04233e-18	192	230.514	793	1290.86	0.0490711	NA	NA	1086	2008.31	NA	0.159923	0.0341791	0.0925013
Bcin01g01040.1	1	3.24734	1085	1879.06	0.0984106	2	12.5738	985	1542.63	0.00340833	12	42.0135	781	1211.93	7.83883e-05	96	317.381	989	1561.68	3.72299e-25	2	6.47654	987	1555.2	0.0569996	192	288.682	793	1253.95	4.20937e-05	NA	NA	1086	1882.31	NA	0.143861	0.00293565	0.130852
Bcin01g01050.1	1	9.33004	1085	921.091	0.00400933	2	7.54022	985	785.849	0.034086	12	6.1393	781	615.78	0.913819	96	108.063	989	813.028	0.192775	2	19.6386	987	793.389	0.00014536	192	163.929	793	621.92	1	NA	NA	1086	930.421	NA	0.102127	0.0185598	0.154925
Bcin01g01070.1	1	4.95292	1085	1727.16	0.03894	2	0.852759	985	1445.22	0.685737	12	24.3906	781	1202.07	0.0263268	96	278.949	989	1448.21	1.70511e-19	2	2.13697	987	1446.07	0.392484	192	218.76	793	1226.46	0.130471	NA	NA	1086	1732.11	NA	0.13856	0.00106148	0.108663
Bcin01g01080.1	1	0.575846	1085	2119.42	0.507905	2	1.59093	985	1456.34	0.495334	12	23.5711	781	1180.34	0.0331279	96	642.958	989	1476.46	8.8292e-81	2	18.5363	987	1457.93	0.000241261	192	252.424	793	1203.91	0.00506917	NA	NA	1086	2120	NA	0.231156	0.00666415	0.0907512
Bcin01g01100.1	1	59.539	1085	3146.19	5.71537e-14	2	88.8306	985	1575.96	5.61717e-19	12	91.2275	781	1145.98	2.22394e-13	96	1439.32	989	1706.87	2.64064e-236	2	42.0755	987	1664.79	4.12332e-09	192	338.756	793	1237.2	9.15823e-09	NA	NA	1086	3205.73	NA	0.30708	0.00897684	0.0722737
Bcin01g01110.1	1	14.92	1085	1804.39	0.000238785	2	62.6041	985	1418.09	1.66629e-13	12	22.5621	781	1156.52	0.0439073	96	318.933	989	1485.46	2.16752e-25	2	4.76088	987	1480.7	0.122258	192	239.013	793	1179.08	0.0216044	NA	NA	1086	1819.31	NA	0.148825	0.00222159	0.111532
Bcin01g01120.1	1	22.5661	1085	1939.25	5.1602e-06	2	92.5414	985	1443.49	9.40502e-20	12	25.8385	781	1179.51	0.0171924	96	330.689	989	1608.56	3.47731e-27	2	72.5289	987	1536.04	2.33811e-15	192	238.146	793	1205.35	0.0235711	NA	NA	1086	1961.82	NA	0.139824	0.0306671	0.100694
Bcin01g01140.1	1	135.379	1085	2332.85	3.47882e-30	2	149.237	985	1646.8	1.30977e-31	12	194.984	781	1190	3.48797e-33	96	487.936	989	1844.92	4.76194e-53	2	48.8796	987	1796.04	1.65643e-10	192	261.812	793	1384.99	0.0016485	NA	NA	1086	2468.23	NA	0.162372	0.0162658	0.0871241
Bcin01g01150.1	1	20.2121	1085	1904.95	1.66879e-05	2	13.4344	985	1539.18	0.00228209	12	61.7324	781	1207.23	4.12291e-08	96	325.103	989	1579.85	2.49036e-26	2	27.2316	987	1552.61	4.27939e-06	192	270.217	793	1268.96	0.000558392	NA	NA	1086	1925.16	NA	0.142746	0.0119568	0.118647
Bcin01g01150.2	1	27.02	1085	2007.28	5.62251e-07	2	19.5112	985	1593.87	0.000135086	12	72.5724	781	1250.29	5.17873e-10	96	354.794	989	1652.49	6.09121e-31	2	39.1077	987	1613.38	1.6609e-08	192	271.013	793	1322.86	0.000503913	NA	NA	1086	2034.3	NA	0.146114	0.0161056	0.11161
Bcin01g01160.1	1	22.0713	1085	1833.86	6.61879e-06	2	3.42199	985	1517.73	0.217828	12	41.369	781	1214.12	9.89333e-05	96	311.136	989	1522.73	3.25049e-24	2	1.5778	987	1521.15	0.50049	192	262.236	793	1255.49	0.00156529	NA	NA	1086	1855.93	NA	0.14347	0.000727551	0.120921
Bcin01g01170.1	1	1.74891	1085	1051.7	0.232967	2	5.4689	985	837.134	0.0864859	12	21.446	781	645.962	0.0595389	96	206.495	989	845.205	6.16124e-10	2	2.60205	987	842.603	0.320029	192	169.727	793	667.408	0.9655	NA	NA	1086	1053.45	NA	0.163555	0.00206096	0.134432
Bcin01g01180.1	1	6.62329	1085	1953.16	0.0160977	2	30.4634	985	1471.33	7.80804e-07	12	50.4939	781	1195.34	3.35002e-06	96	443.477	989	1509.69	1.88794e-45	2	7.89343	987	1501.79	0.030168	192	225.498	793	1245.83	0.0760582	NA	NA	1086	1959.79	NA	0.183927	0.00327371	0.0935226
Bcin01g01190.1	1	1.68391	1085	2486.57	0.242622	2	169.323	985	1595.92	7.87937e-36	12	208.875	781	1154.58	6.82892e-36	96	709.522	989	1777.05	3.88518e-93	2	11.8046	987	1765.24	0.00517851	192	232.463	793	1363.46	0.0411268	NA	NA	1086	2488.25	NA	0.221064	0.00367793	0.072428
Bcin01g01200.1	1	34.5436	1085	1909.29	1.36547e-08	2	45.3472	985	1551.62	6.50447e-10	12	54.9525	781	1213.66	6.02307e-07	96	249.081	989	1660.2	2.40509e-15	2	63.2322	987	1596.97	1.94371e-13	192	283.01	793	1268.61	9.646e-05	NA	NA	1086	1943.83	NA	0.110401	0.0280267	0.12544
Bcin01g01210.1	1	8.70178	1085	2437.22	0.00549911	2	15.2556	985	1515.03	0.000977312	12	103.447	781	1163.55	1.2501e-15	96	773.516	989	1663.7	3.50499e-105	2	133.416	987	1530.29	6.16475e-28	192	248.034	793	1267	0.00833779	NA	NA	1086	2445.92	NA	0.230704	0.0397919	0.073977
Bcin01g01220.1	1	7.02434	1085	1333.07	0.0130785	2	5.3074	985	957.575	0.0929197	12	10.8923	781	781.922	0.565908	96	355.199	989	977.874	5.25522e-31	2	14.9918	987	962.883	0.00121348	192	164.761	793	792.815	1	NA	NA	1086	1340.1	NA	0.207684	0.00876562	0.0963349
Bcin01g01230.1	1	0.31284	1085	1702.7	0.629732	2	17.1544	985	1513.75	0.000406379	12	19.3519	781	1241.3	0.102256	96	171.418	989	1531.29	4.28745e-06	2	0.381839	987	1530.9	0.846439	192	253.094	793	1260.66	0.00469746	NA	NA	1086	1703.02	NA	0.091432	0.000203667	0.134997
Bcin01g01240.1	1	9.58551	1085	1289.28	0.0035252	2	17.3328	985	1104.95	0.000374135	12	38.5675	781	891.523	0.000266967	96	145.169	989	1144.11	0.000999257	2	21.8254	987	1122.28	5.26143e-05	192	174.858	793	930.09	0.906003	NA	NA	1086	1298.86	NA	0.0990337	0.0148892	0.119287
Bcin01g01260.1	1	96.4655	1085	2569.46	7.15084e-22	2	232.768	985	1709.45	4.48599e-49	12	189.67	781	1278.79	3.84619e-32	96	545.197	989	2024.27	4.31137e-63	2	82.052	987	1942.21	2.67249e-17	192	240.989	793	1468.46	0.0176287	NA	NA	1086	2665.93	NA	0.165553	0.0249157	0.0731782
Bcin01g01270.1	1	19.0301	1085	1740.72	3.02501e-05	2	46.714	985	1347.08	3.38076e-10	12	79.3969	781	1005.26	3.12659e-11	96	305.245	989	1435.48	2.47108e-23	2	41.6844	987	1393.79	4.94774e-09	192	262.424	793	1084.66	0.00153126	NA	NA	1086	1759.75	NA	0.144894	0.0197868	0.124568
Bcin01g01280.1	1	28.8788	1085	1918.01	2.23691e-07	2	47.458	985	1527.74	2.37141e-10	12	55.8383	781	1217.43	4.25883e-07	96	335.736	989	1582.28	5.79211e-28	2	7.08137	987	1575.2	0.0433035	192	254.466	793	1273.27	0.0039917	NA	NA	1086	1946.89	NA	0.146628	0.00309269	0.111135
Bcin01g01290.1	1	19.6612	1085	1975.91	2.19933e-05	2	52.1491	985	1542.95	2.5114e-11	12	87.867	781	1180.05	9.26182e-13	96	359.986	989	1615.93	9.2214e-32	2	20.8338	987	1595.1	8.3576e-05	192	275.031	793	1267.92	0.000294374	NA	NA	1086	1995.58	NA	0.151484	0.00876696	0.115734
Bcin01g01300.1	1	0.713824	1085	2039.47	0.45893	2	5.23661	985	1559.89	0.0959399	12	67.8488	781	1212.47	3.52375e-09	96	446.905	989	1592.56	4.98272e-46	2	27.4375	987	1565.12	3.88275e-06	192	279.572	793	1280.31	0.000157327	NA	NA	1086	2040.18	NA	0.17773	0.0109116	0.111183
Bcin01g01320.1	1	107.968	1085	1994.82	2.45997e-24	2	113.098	985	1394.04	4.80923e-24	12	86.4446	781	1090.76	1.68517e-12	96	482.422	989	1512.4	4.27561e-52	2	5.25464	987	1507.14	0.0981384	192	216.836	793	1177.21	0.150292	NA	NA	1086	2102.79	NA	0.18623	0.00202846	0.0837054
Bcin01g01350.1	1	7.30069	1085	1358.84	0.0113061	2	15.9684	985	1076.16	0.000704696	12	23.5713	781	830.877	0.0331279	96	254.727	989	1104.11	4.11538e-16	2	11.9801	987	1092.13	0.00478154	192	221.715	793	854.448	0.103876	NA	NA	1086	1366.14	NA	0.156002	0.00733694	0.135784
Bcin01g01380.1	1	10.4483	1085	1053.72	0.00227448	2	2.97691	985	802.986	0.265939	12	8.0288	781	643.493	0.796255	96	239.863	989	813.861	4.05016e-14	2	7.89854	987	805.963	0.0301012	192	151.464	793	651.522	1	NA	NA	1086	1064.17	NA	0.182832	0.00602053	0.115451
Bcin01g01390.1	1	3.57368	1085	1647.78	0.0821633	2	36.3194	985	1381.48	4.80943e-08	12	25.4561	781	1075.96	0.0192277	96	229.263	989	1418.51	9.60553e-13	2	0.712279	987	1417.8	0.733312	192	280.07	793	1101.41	0.000146545	NA	NA	1086	1651.35	NA	0.121863	0.000378605	0.148868
Bcin01g01400.1	1	9.30631	1085	1283.03	0.00405538	2	1.59807	985	984.586	0.493802	12	23.0236	781	774.671	0.038691	96	291.741	989	991.291	2.41778e-21	2	5.10697	987	986.184	0.104953	192	186.892	793	797.694	0.695578	NA	NA	1086	1292.34	NA	0.183579	0.00321358	0.117602
Bcin01g01410.1	1	11.2426	1085	832.102	0.00152274	2	4.1494	985	618.498	0.157102	12	14.804	781	458.944	0.286945	96	206.662	989	625.44	5.88549e-10	2	2.7925	987	622.648	0.294126	192	144.751	793	473.748	1	NA	NA	1086	843.345	NA	0.196298	0.00265245	0.137491
Bcin01g01420.1	1	39.3864	1085	1572.77	1.23307e-09	2	31.2341	985	1225.93	5.41793e-07	12	40.7186	781	988.165	0.000124705	96	312.86	989	1259.91	1.79365e-24	2	2.7504	987	1257.16	0.299578	192	197.043	793	1028.88	0.479479	NA	NA	1086	1612.16	NA	0.162291	0.00142673	0.102213
Bcin01g01430.1	1	27.3206	1085	2513.11	4.84043e-07	2	135.711	985	1610.06	8.85341e-29	12	94.3608	781	1157.25	5.9765e-14	96	764.285	989	1748.83	1.94159e-103	2	3.06289	987	1745.77	0.260805	192	358.448	793	1251.61	1.83548e-10	NA	NA	1086	2540.44	NA	0.231057	0.000925963	0.108365
Bcin01g01440.1	1	8.12962	1085	3636.64	0.00737772	2	355.55	985	1879.54	1.15386e-74	12	239.273	781	1229.17	6.81705e-42	96	1384.7	989	2251.94	2.80063e-225	2	16.8455	987	2235.09	0.000521388	192	411.099	793	1468.44	8.35473e-16	NA	NA	1086	3644.77	NA	0.274399	0.00333818	0.0814651
Bcin01g01460.1	1	76.2645	1085	2999.34	1.50647e-17	2	4.20814	985	1063.64	0.153092	12	8.73858	781	852.021	0.742763	96	1929.49	989	1069.84	0	2	1.99857	987	1067.84	0.417115	192	202.877	793	860.76	0.360808	NA	NA	1086	3075.6	NA	0.385352	0.000399148	0.0405179	hypothetical protein BcDW1_1384	no GO terms
Bcin01g01480.1	1	3.32457	1085	1316.25	0.094251	2	4.58389	985	1094.98	0.129193	12	42.1271	781	844.082	7.52989e-05	96	207.534	989	1108.72	4.63852e-10	2	9.1587	987	1099.56	0.01711	192	208.767	793	886.209	0.258277	NA	NA	1086	1319.58	NA	0.135089	0.00596165	0.135892
Bcin01g01490.1	1	16.1939	1085	1704.61	0.000125434	2	10.8203	985	1405.26	0.0076247	12	27.7806	781	1155.57	0.00951984	96	265.331	989	1439.28	1.42428e-17	2	23.2002	987	1416.08	2.77614e-05	192	221.913	793	1183.35	0.102219	NA	NA	1086	1720.81	NA	0.132049	0.0115462	0.110441
Bcin01g01500.1	1	4.89723	1085	1797.27	0.0400992	2	10.8821	985	1396.28	0.0074212	12	23.8898	781	1131.38	0.0303145	96	387.411	989	1409.86	3.65514e-36	2	2.6889	987	1407.17	0.307833	192	241.01	793	1155.27	0.017595	NA	NA	1086	1802.16	NA	0.176717	0.00122654	0.109937
Bcin01g01510.1	1	34.7202	1085	1824.16	1.25186e-08	2	8.62885	985	1538.43	0.0208578	12	26.0925	781	1219.84	0.0159456	96	274.903	989	1549.26	6.41969e-19	2	2.20266	987	1547.06	0.381681	192	292.498	793	1245.93	2.39804e-05	NA	NA	1086	1858.88	NA	0.128701	0.00103121	0.136938
Bcin01g01510.2	1	29.1674	1085	1760.88	1.93814e-07	2	2.69062	985	1470.12	0.30283	12	19.0786	781	1195.52	0.109553	96	287.336	989	1473.55	1.06014e-20	2	0.73379	987	1472.81	0.726943	192	255.527	793	1214.59	0.00351843	NA	NA	1086	1790.05	NA	0.138267	0.000353103	0.122961
Bcin01g01520.1	1	123.201	1085	1988.56	1.37956e-27	2	32.6736	985	1532.41	2.74067e-07	12	34.8149	781	1206.97	0.000975635	96	377.719	989	1610.84	1.35939e-34	2	45.7579	987	1565.08	7.30523e-10	192	290.629	793	1241.78	3.1799e-05	NA	NA	1086	2111.76	NA	0.148987	0.0180487	0.114636
Bcin01g01530.1	1	4.62184	1085	1696.74	0.0464381	2	5.96636	985	1413.16	0.0694229	12	17.4495	781	1178.69	0.161836	96	276.181	989	1420.56	4.23254e-19	2	1.43303	987	1419.13	0.533505	192	217.024	793	1196.14	0.148206	NA	NA	1086	1701.36	NA	0.139557	0.000724125	0.109665
Bcin01g01550.1	1	407.969	1085	2742.06	1.65218e-88	2	191.859	985	1836.57	1.49852e-40	12	199.901	781	1251.73	3.91857e-34	96	705.982	989	2036.08	1.77882e-92	2	7.6435	987	2028.43	0.0337522	192	384.941	793	1451.63	5.14816e-13	NA	NA	1086	3150.03	NA	0.182724	0.00197831	0.0996313
Bcin01g01570.1	1	5.01895	1085	2829.68	0.0375909	2	124.201	985	1610.56	2.29255e-26	12	100.396	781	1221.76	4.60497e-15	96	1087.28	989	1742.4	5.70386e-166	2	7.64295	987	1734.76	0.0337559	192	288.408	793	1322.15	4.38282e-05	NA	NA	1086	2834.7	NA	0.276687	0.00194496	0.0733935
Bcin01g01580.1	1	2.61247	1085	1127.77	0.140361	2	7.55819	985	913.826	0.033808	12	24.8414	781	692.757	0.0230989	96	192.211	989	935.559	2.71585e-08	2	14.175	987	921.384	0.00175374	192	196.227	793	717.598	0.496848	NA	NA	1086	1130.38	NA	0.143788	0.0106039	0.146792
Bcin01g01590.1	1	19.1591	1085	2453.62	2.83239e-05	2	22.8006	985	1644.31	2.86016e-05	12	73.955	781	1212.23	2.96208e-10	96	711.935	989	1741.69	1.38259e-93	2	74.5759	987	1667.11	9.01351e-16	192	358.125	793	1286.19	1.96439e-10	NA	NA	1086	2472.78	NA	0.218432	0.022881	0.109878
Bcin01g01600.1	1	23.8087	1085	1694	2.77401e-06	2	6.22463	985	1320.13	0.06177	12	11.2295	781	1050.89	0.538234	96	364.752	989	1329.24	1.61586e-32	2	2.88479	987	1326.36	0.282163	192	258.02	793	1062.11	0.00260887	NA	NA	1086	1717.81	NA	0.174904	0.0013833	0.123724
Bcin01g01610.1	1	183.357	1085	2820.83	1.8999e-40	2	40.3893	985	1589.49	6.87808e-09	12	26.2641	781	1176.98	0.0151257	96	1164.32	989	1656.52	3.23868e-181	2	26.6362	987	1629.88	5.63982e-06	192	386.247	793	1203.24	3.76803e-13	NA	NA	1086	3004.19	NA	0.277539	0.00634929	0.0920699
Bcin01g01620.1	1	62.0168	1085	2118.02	1.68979e-14	2	1.1796	985	1504.92	0.593428	12	48.5941	781	1166.84	6.86783e-06	96	597.739	989	1520.28	1.59583e-72	2	14.1901	987	1506.09	0.00174208	192	289.483	793	1215.43	3.75704e-05	NA	NA	1086	2180.04	NA	0.214092	0.00508247	0.103684
Bcin01g01630.1	1	80.7175	1085	1941.86	1.68358e-18	2	9.66338	985	1554.69	0.0129726	12	29.5742	781	1263.52	0.00540986	96	375.107	989	1566.76	3.56983e-34	2	2.40593	987	1564.35	0.349417	192	261.59	793	1293.1	0.00169071	NA	NA	1086	2022.58	NA	0.156289	0.00100243	0.108992
Bcin01g01640.1	1	61.6198	1085	1130.24	2.05294e-14	2	27.378	985	532.11	3.34581e-06	12	7.9283	781	368.802	0.803517	96	569.842	989	560.394	1.73477e-67	2	0.905879	987	559.488	0.672404	192	155.379	793	376.73	1	NA	NA	1086	1191.86	NA	0.323296	0.000513944	0.0881533
Bcin01g01680.1	1	8.73189	1085	853.068	0.0054161	2	0.362588	985	747.428	0.851619	12	14.2629	781	586.607	0.318641	96	102.535	989	750.533	0.310213	2	2.74218	987	747.791	0.300581	192	146.558	793	600.87	1	NA	NA	1086	861.8	NA	0.106026	0.00283553	0.151547
Bcin01g01700.1	1	20.123	1085	2144.82	1.74522e-05	2	5.56574	985	1617.86	0.0828498	12	102.845	781	1253.4	1.62083e-15	96	461.087	989	1683.73	1.9563e-48	2	60.3137	987	1623.42	7.80916e-13	192	261.605	793	1356.25	0.00168806	NA	NA	1086	2164.95	NA	0.171641	0.0224519	0.0973832
Bcin01g01710.1	1	53.294	1085	2115.28	1.25466e-12	2	112.969	985	1563.13	5.10998e-24	12	89.3032	781	1243.44	5.03025e-13	96	413.977	989	1701.3	1.61653e-40	2	25.2072	987	1676.1	1.1034e-05	192	230.382	793	1332.74	0.0496292	NA	NA	1086	2168.57	NA	0.158748	0.00966624	0.0883447
Bcin01g01720.1	1	96.4856	1085	1867.59	7.08463e-22	2	5.80907	985	1471.27	0.0744437	12	12.9738	781	1208.88	0.404832	96	387.977	989	1479.61	2.95486e-36	2	2.53904	987	1477.07	0.329181	192	249.415	793	1221.85	0.00715557	NA	NA	1086	1964.08	NA	0.164775	0.00107834	0.105927
Bcin01g01730.1	1	29.0406	1085	1735.65	2.06343e-07	2	28.6235	985	1301.03	1.8587e-06	12	31.8374	781	1069.44	0.00262698	96	386.015	989	1349.64	6.1626e-36	2	19.981	987	1329.65	0.00012453	192	199.753	793	1101.28	0.4231	NA	NA	1086	1764.69	NA	0.177831	0.00920491	0.0920231
Bcin01g01740.1	1	74.2313	1085	1834.48	4.09287e-17	2	34.9227	985	1498.48	9.36633e-08	12	41.3467	781	1207.87	9.97375e-05	96	281.742	989	1552.74	6.80768e-20	2	19.3298	987	1533.41	0.000167553	192	249.263	793	1249.22	0.00727395	NA	NA	1086	1908.71	NA	0.127498	0.00874738	0.1128
Bcin01g01760.1	1	184.524	1085	2428.62	1.0738e-40	2	120.216	985	1540.83	1.54628e-25	12	71.4639	781	1206.63	8.13787e-10	96	766.156	989	1662.47	8.59234e-104	2	1.42464	987	1661.04	0.535181	192	262.73	793	1278.1	0.00147373	NA	NA	1086	2613.15	NA	0.226625	0.0004214	0.077714
Bcin01g01770.1	1	62.0126	1085	1767.9	1.69248e-14	2	18.7624	985	1473.74	0.000191719	12	33.6287	781	1213.39	0.00145277	96	247.926	989	1519.98	3.43306e-15	2	27.4778	987	1492.5	3.81394e-06	192	226.715	793	1247.02	0.068634	NA	NA	1086	1829.92	NA	0.117762	0.0130516	0.107687
Bcin01g01780.1	1	1.4861	1085	1696.21	0.274034	2	9.83108	985	1481.06	0.0120092	12	26.2028	781	1210.56	0.015409	96	187.909	989	1508.3	8.12101e-08	2	17.4089	987	1490.89	0.000403911	192	244.302	793	1236.76	0.012475	NA	NA	1086	1697.7	NA	0.098743	0.00914806	0.128376
Bcin01g01790.1	1	55.2088	1085	2111.01	4.87985e-13	2	39.6908	985	1533.98	9.6189e-09	12	64.0128	781	1245.8	1.65843e-08	96	491.293	989	1619.72	1.25048e-53	2	46.0494	987	1573.67	6.36613e-10	192	224.17	793	1309.81	0.0850431	NA	NA	1086	2166.22	NA	0.181721	0.0170329	0.0829164
Bcin01g01800.1	1	141.216	1085	2106.93	1.96165e-31	2	87.0792	985	1496.1	1.3009e-18	12	85.8032	781	1136.24	2.21433e-12	96	493.125	989	1613.81	6.02833e-54	2	30.6322	987	1583.17	8.78374e-07	192	274.055	793	1222.04	0.000335771	NA	NA	1086	2248.15	NA	0.177901	0.011051	0.0988688
Bcin01g01810.1	1	7.44967	1085	1482.5	0.0104646	2	1.9171	985	1302.76	0.429373	12	37.3346	781	1038.48	0.000411845	96	171.954	989	1310.54	3.79248e-06	2	5.86405	987	1304.68	0.0748013	192	226.944	793	1075.82	0.0672833	NA	NA	1086	1489.95	NA	0.103104	0.00351611	0.136077
Bcin01g01820.1	1	101.77	1085	1967.52	5.1688e-23	2	40.2724	985	1527.97	7.27635e-09	12	66.3816	781	1181.51	6.39172e-09	96	385.258	989	1582.26	8.18603e-36	2	14.0179	987	1568.25	0.00188422	192	280.086	793	1247.89	0.000146225	NA	NA	1086	2069.29	NA	0.156065	0.00567856	0.113461
Bcin01g01830.1	1	6.06839	1085	1805.4	0.0215607	2	13.8505	985	1355	0.00188362	12	5.35906	781	1139.82	0.947757	96	363.058	989	1442.34	3.0011e-32	2	73.4869	987	1368.85	1.49475e-15	192	209.828	793	1145.17	0.241817	NA	NA	1086	1811.47	NA	0.161502	0.0326897	0.0933393
Bcin01g01840.1	1	1.04053	1085	1801.79	0.366193	2	4.02913	985	1571.82	0.165834	12	12.6596	781	1250.83	0.427009	96	222.199	989	1579.59	7.51755e-12	2	3.73494	987	1575.85	0.192914	192	308.329	793	1263.49	2.01777e-06	NA	NA	1086	1802.83	NA	0.109524	0.001841	0.151979
Bcin01g01850.1	1	4.49709	1085	1727.88	0.0497422	2	7.58432	985	1440.17	0.0334278	12	20.5776	781	1173.76	0.0747425	96	273.971	989	1453.91	8.71176e-19	2	6.14723	987	1447.76	0.0660037	192	245.834	793	1194.34	0.0106036	NA	NA	1086	1732.37	NA	0.136135	0.00305453	0.122154
Bcin01g01860.1	1	101.78	1085	1747.3	5.15215e-23	2	20.5065	985	1444.87	8.4548e-05	12	11.1145	781	1170.22	0.547688	96	241.105	989	1506.19	2.78182e-14	2	40.8209	987	1465.37	7.4361e-09	192	263.53	793	1181.34	0.0013393	NA	NA	1086	1849.08	NA	0.113141	0.0191557	0.123664
Bcin01g01870.1	1	82.0631	1085	1729.5	8.67263e-19	2	12.0711	985	1464.13	0.00429651	12	24.4929	781	1192.01	0.0255615	96	231.878	989	1497.62	4.44115e-13	2	21.4212	987	1476.2	6.36462e-05	192	247.622	793	1216.5	0.00874525	NA	NA	1086	1811.56	NA	0.112297	0.0103741	0.119922
Bcin01g01880.1	1	1.84202	1085	1261.83	0.220359	2	0.188571	985	1135.86	0.920232	12	8.45024	781	929.934	0.764848	96	114.066	989	1147.76	0.104329	2	11.716	987	1136.05	0.00538677	192	197.473	793	938.385	0.470725	NA	NA	1086	1263.67	NA	0.0820942	0.00843207	0.142123
Bcin01g01890.1	1	24.1388	1085	1880.64	2.35406e-06	2	4.62854	985	1528.63	0.126655	12	45.5815	781	1227.23	2.12201e-05	96	300.587	989	1580.05	1.20998e-22	2	46.7924	987	1533.26	4.47981e-10	192	255.824	793	1272.81	0.0033949	NA	NA	1086	1904.78	NA	0.133466	0.0207767	0.11359
Bcin01g01900.1	1	174.695	1085	2044.64	1.32241e-38	2	11.2447	985	1517.17	0.0062788	12	53.997	781	1188.56	8.70208e-07	96	482.967	989	1561.68	3.44175e-52	2	33.2575	987	1528.42	2.56739e-07	192	274.619	793	1242.55	0.000311019	NA	NA	1086	2219.34	NA	0.176551	0.0121575	0.100388
Bcin01g01910.1	1	34.1249	1085	2351.9	1.68073e-08	2	185.807	985	1522.18	2.74379e-39	12	97.1193	781	1161.28	1.85092e-14	96	618.301	989	1733.6	2.84881e-76	2	25.614	987	1707.98	9.09027e-06	192	263.776	793	1258.4	0.00129934	NA	NA	1086	2386.02	NA	0.204064	0.00845363	0.0870566
Bcin01g01910.2	1	41.2866	1085	2412.06	4.81664e-10	2	183.857	985	1505.16	7.04215e-39	12	110.967	781	1141.3	5.01607e-17	96	707.144	989	1704.91	1.07987e-92	2	15.8913	987	1689.02	0.000806602	192	252.899	793	1252.26	0.00479546	NA	NA	1086	2453.34	NA	0.222626	0.00500296	0.0796188
Bcin01g01920.1	1	24.8982	1085	1712.29	1.61334e-06	2	14.2523	985	1429.53	0.00155928	12	37.0041	781	1183.55	0.000461069	96	267.8	989	1444.49	6.45355e-18	2	0.700542	987	1443.79	0.737047	192	208.976	793	1220.56	0.25494	NA	NA	1086	1737.18	NA	0.13352	0.000349278	0.104192
Bcin01g01940.1	1	7.8091	1085	1376.65	0.00870838	2	20.293	985	1205.14	9.3539e-05	12	34.4776	781	1012.41	0.00109649	96	146.917	989	1229.73	0.000721961	2	4.29472	987	1225.44	0.150409	192	158.259	793	1046.89	1	NA	NA	1086	1384.46	NA	0.0956697	0.00279664	0.103055
Bcin01g01940.2	1	0.000761341	1085	1446.28	0.9819	2	24.9795	985	1276.14	1.03325e-05	12	21.2351	781	1048	0.0629127	96	141.664	989	1304.62	0.00187836	2	3.49931	987	1301.12	0.214455	192	206.902	793	1069.24	0.288238	NA	NA	1086	1446.28	NA	0.0890158	0.00219883	0.130009
Bcin01g01950.1	1	9.54968	1085	1643.21	0.00358982	2	5.84884	985	1377.4	0.0731708	12	15.5984	781	1153.03	0.243174	96	240.671	989	1402.54	3.17463e-14	2	19.2916	987	1383.25	0.000170641	192	208.764	793	1168.63	0.2583	NA	NA	1086	1652.76	NA	0.125827	0.0100859	0.109145
Bcin01g01960.1	1	0.000962635	1085	1403.52	0.979893	2	0.861761	985	1269.49	0.682889	12	6.23814	781	1045.59	0.908694	96	129.649	989	1273.87	0.0135388	2	3.52127	987	1270.35	0.212324	192	217.657	793	1051.83	0.141646	NA	NA	1086	1403.52	NA	0.0843692	0.00229147	0.141641
Bcin01g01970.1	1	2.1909	1085	1774.52	0.179136	2	4.74707	985	1531.83	0.119996	12	13.7011	781	1246.5	0.354361	96	232.085	989	1542.43	4.17628e-13	2	5.85431	987	1536.58	0.0750921	192	271.625	793	1260.21	0.00046639	NA	NA	1086	1776.71	NA	0.115199	0.00290587	0.134825
Bcin01g01980.1	1	25.4777	1085	1387.9	1.21029e-06	2	21.8243	985	1133.2	4.53885e-05	12	19.8699	781	878.72	0.0897953	96	219.288	989	1168.61	1.72837e-11	2	13.5879	987	1155.02	0.00228643	192	234.606	793	898.59	0.0333662	NA	NA	1086	1413.37	NA	0.133204	0.00825383	0.14251
Bcin01g01990.1	1	0.195267	1085	1866.47	0.706593	2	7.48292	985	1544.32	0.0349876	12	40.52	781	1184.31	0.000133922	96	308.129	989	1558.34	9.16853e-24	2	6.53537	987	1551.8	0.0554428	192	319.484	793	1224.83	3.09978e-07	NA	NA	1086	1866.66	NA	0.141258	0.00299605	0.146463
Bcin01g02000.1	1	6.87935	1085	2158.83	0.0140888	2	25.2762	985	1538.96	8.99817e-06	12	75.5877	781	1234.32	1.52388e-10	96	573.604	989	1585.23	3.66394e-68	2	20.9897	987	1564.24	7.78682e-05	192	229.049	793	1309.91	0.0560162	NA	NA	1086	2165.71	NA	0.207805	0.00760414	0.0829796
Bcin01g02010.1	1	132.795	1085	2227.2	1.23786e-29	2	74.3674	985	1515.35	5.98797e-16	12	129.29	781	1142.43	1.68204e-20	96	624.878	989	1602.33	1.80531e-77	2	12.6043	987	1589.72	0.00357993	192	243.636	793	1271.72	0.0133913	NA	NA	1086	2360	NA	0.208468	0.00420496	0.0812804
Bcin01g02020.1	1	28.38	1085	2131.19	2.86803e-07	2	31.333	985	1721.81	5.17328e-07	12	57.1593	781	1315.97	2.54177e-07	96	370.894	989	1760.3	1.69526e-33	2	7.15623	987	1753.14	0.0418946	192	348.673	793	1373.13	1.39397e-09	NA	NA	1086	2159.57	NA	0.146158	0.00282006	0.137402
Bcin01g02030.1	1	32.3186	1085	2088.3	4.09182e-08	2	10.6084	985	1608.13	0.00840107	12	67.7101	781	1254.48	3.72743e-09	96	464.92	989	1623.38	4.36589e-49	2	4.64674	987	1618.73	0.128632	192	285.935	793	1322.19	6.3184e-05	NA	NA	1086	2120.62	NA	0.179493	0.00179398	0.110392
Bcin01g02040.1	1	120.536	1085	1917.19	5.10443e-27	2	10.4399	985	1528.14	0.0090866	12	43.1712	781	1182.13	5.14434e-05	96	309.333	989	1607.85	6.051e-24	2	69.272	987	1538.58	1.09405e-14	192	302.844	793	1225.3	4.87327e-06	NA	NA	1086	2037.72	NA	0.128018	0.0286683	0.125332
Bcin01g02050.1	1	211.458	1085	2067.59	1.83042e-46	2	5.30433	985	1530.02	0.0930358	12	45.1748	781	1198.5	2.47082e-05	96	522.826	989	1544.76	3.89578e-59	2	9.4321	987	1535.33	0.0150947	192	286.353	793	1243.67	5.93675e-05	NA	NA	1086	2279.04	NA	0.185973	0.00335506	0.101858
Bcin01g02060.1	1	19.5925	1085	1631.22	2.27633e-05	2	4.3946	985	1406.84	0.140758	12	48.8457	781	1123.58	6.24278e-06	96	204.077	989	1427.15	1.18942e-09	2	15.9153	987	1411.23	0.000797324	192	234.408	793	1172.43	0.0340175	NA	NA	1086	1650.82	NA	0.109085	0.0085072	0.125298
Bcin01g02070.1	1	8.18819	1085	1711.67	0.00716546	2	2.32543	985	1447.5	0.357321	12	10.0561	781	1186.26	0.634925	96	223.529	989	1488.14	5.12586e-12	2	38.31	987	1449.83	2.43293e-08	192	251.189	793	1196.32	0.00582226	NA	NA	1086	1719.86	NA	0.112797	0.0193319	0.126754
Bcin01g02080.1	1	1.76952	1085	888.508	0.230145	2	3.24302	985	776.821	0.236133	12	9.91598	781	591.161	0.646811	96	96.6751	989	791.833	0.465083	2	11.7682	987	780.064	0.00526279	192	175.744	793	601.077	0.892716	NA	NA	1086	890.277	NA	0.0967989	0.0117833	0.175969
Bcin01g02090.1	1	22.0565	1085	1940.67	6.66435e-06	2	51.9201	985	1505.41	2.80334e-11	12	63.5747	781	1180.56	1.9743e-08	96	366.656	989	1574.02	8.03849e-33	2	16.6869	987	1557.33	0.000560398	192	261.271	793	1244.14	0.0017597	NA	NA	1086	1962.73	NA	0.156285	0.00711271	0.111365
Bcin01g02100.1	1	33.1169	1085	1763.53	2.75915e-08	2	2.95039	985	1522.58	0.268977	12	43.4147	781	1206.09	4.71937e-05	96	217.108	989	1546.42	3.20983e-11	2	20.8891	987	1525.53	8.15643e-05	192	273.074	793	1249.5	0.000384102	NA	NA	1086	1796.64	NA	0.106706	0.0102667	0.134213
Bcin01g02110.1	1	9.12827	1085	1442.01	0.00442303	2	2.71689	985	1304.21	0.299428	12	8.79727	781	1086.3	0.73811	96	132.145	989	1309.87	0.00922174	2	2.94373	987	1306.92	0.274953	192	209.106	793	1095.1	0.252969	NA	NA	1086	1451.14	NA	0.0833078	0.00185581	0.131826
Bcin01g02120.1	1	405.326	1085	1970.96	6.00386e-88	2	87.5282	985	1447.42	1.04765e-18	12	21.9836	781	1178.08	0.0514015	96	324.043	989	1646.91	3.61701e-26	2	111.97	987	1534.94	1.64435e-23	192	247.348	793	1200.07	0.00901218	NA	NA	1086	2376.28	NA	0.115224	0.0398145	0.0879524
Bcin01g02130.1	1	6.83354	1085	1731.43	0.0144271	2	30.2821	985	1488.68	8.51379e-07	12	50.6298	781	1177.06	3.18247e-06	96	208.653	989	1522.78	3.41147e-10	2	3.81769	987	1518.96	0.185774	192	260.992	793	1227.69	0.00182071	NA	NA	1086	1738.27	NA	0.106961	0.00195705	0.133791
Bcin01g02160.1	1	9.83666	1085	2081.58	0.00309891	2	70.2339	985	1609.86	4.34687e-15	12	45.4818	781	1285	2.20253e-05	96	396.869	989	1684.71	1.05508e-37	2	4.61873	987	1680.09	0.130244	192	279.377	793	1330.48	0.000161124	NA	NA	1086	2091.42	NA	0.159199	0.00185275	0.112069
Bcin01g02170.1	1	5.94566	1085	2185.75	0.0229895	2	87.0834	985	1597.01	1.3009e-18	12	118.447	781	1211.09	1.96951e-18	96	429.767	989	1755.98	3.82199e-43	2	71.8868	987	1684.1	3.16509e-15	192	267.472	793	1329.54	0.000801233	NA	NA	1086	2191.69	NA	0.159566	0.0266905	0.0993084
Bcin01g02180.1	1	0.613497	1085	1468.22	0.494334	2	16.9525	985	1289.82	0.000444988	12	32.2702	781	1047.22	0.00228187	96	153.466	989	1314.76	0.000203503	2	7.9802	987	1306.78	0.0290337	192	210.33	793	1079.49	0.234699	NA	NA	1086	1468.83	NA	0.0941345	0.00489499	0.129014
Bcin01g02190.1	1	7.5254	1085	1686.61	0.0100508	2	10.3763	985	1417.56	0.00935133	12	18.9361	781	1157.3	0.113538	96	245.588	989	1441.02	7.06777e-15	2	13.0934	987	1427.93	0.00286174	192	241.324	793	1176.23	0.0170207	NA	NA	1086	1694.14	NA	0.125761	0.00670485	0.123577
Bcin01g02200.1	1	193.884	1085	1971.94	1.04776e-42	2	51.1711	985	1491.92	4.00842e-11	12	83.0094	781	1139.12	7.05382e-12	96	425.433	989	1546.51	2.01539e-42	2	3.42005	987	1543.09	0.222253	192	269.789	793	1222.13	0.000591936	NA	NA	1086	2165.83	NA	0.163964	0.0013181	0.103978
Bcin01g02210.1	1	266.862	1085	1991.75	2.51884e-58	2	56.7318	985	1486.89	2.82859e-12	12	65.6035	781	1136.3	8.72607e-09	96	408.04	989	1583.71	1.55056e-39	2	40.0858	987	1543.62	1.05058e-08	192	284.989	793	1201.9	7.2042e-05	NA	NA	1086	2258.61	NA	0.15075	0.0148096	0.105289
Bcin01g02220.1	1	22.8493	1085	1992.33	4.4774e-06	2	23.3988	985	1524.16	2.16853e-05	12	60.444	781	1225.61	6.90144e-08	96	437.989	989	1554.34	1.59856e-44	2	6.78871	987	1547.55	0.0494197	192	238.102	793	1286.05	0.0236725	NA	NA	1086	2015.18	NA	0.178047	0.00275969	0.0967909
Bcin01g02220.2	1	24.3139	1085	1988.02	2.15385e-06	2	27.1487	985	1558.63	3.7251e-06	12	41.9172	781	1226.92	8.10969e-05	96	386.951	989	1601.07	4.34052e-36	2	15.2917	987	1585.78	0.00105946	192	289.793	793	1268.84	3.59578e-05	NA	NA	1086	2012.34	NA	0.160256	0.00633305	0.120018
Bcin01g02230.1	1	12.8704	1085	1724.08	0.000670531	2	13.1185	985	1490.53	0.00264681	12	19.3435	781	1211.51	0.102466	96	212.385	989	1511.69	1.21135e-10	2	8.04572	987	1503.65	0.0281884	192	259.678	793	1230.85	0.0021332	NA	NA	1086	1736.95	NA	0.108505	0.00411045	0.132666
Bcin01g02240.1	1	2.67753	1085	1938.17	0.135426	2	9.23099	985	1508.27	0.0158343	12	47.5355	781	1199	1.02727e-05	96	351.066	989	1587.1	2.34977e-30	2	69.6061	987	1517.5	9.36655e-15	192	261.728	793	1246.54	0.00166246	NA	NA	1086	1940.85	NA	0.148661	0.0294751	0.11083
Bcin01g02250.1	1	1.27722	1085	1912.32	0.312708	2	8.93977	985	1441.43	0.0181071	12	33.1201	781	1163.5	0.00171937	96	425.612	989	1486.71	1.88211e-42	2	36.338	987	1450.37	6.11116e-08	192	244.807	793	1196.62	0.0118368	NA	NA	1086	1913.59	NA	0.179164	0.0152967	0.103053
Bcin01g02260.1	1	4.98841	1085	2006.23	0.0381921	2	5.61685	985	1539.48	0.0810049	12	52.4915	781	1232.52	1.55877e-06	96	385.875	989	1620.36	6.49169e-36	2	75.2626	987	1545.1	6.49282e-16	192	254.467	793	1285.01	0.0039917	NA	NA	1086	2011.22	NA	0.156076	0.0304416	0.102925
Bcin01g02270.1	1	4.41585	1085	2053.92	0.0518624	2	5.21383	985	1593.11	0.0969155	12	97.7682	781	1202.33	1.40576e-14	96	440.044	989	1613.87	7.1649e-45	2	15.5503	987	1598.32	0.000942204	192	293.009	793	1300.1	2.22304e-05	NA	NA	1086	2058.33	NA	0.175042	0.00618565	0.116554
Bcin01g02280.1	1	0.367989	1085	2246.29	0.600148	2	36.2138	985	1624.32	5.0622e-08	12	144.202	781	1218.8	2.31458e-23	96	548.296	989	1697.99	1.20735e-63	2	37.4576	987	1660.53	3.61924e-08	192	261.317	793	1363	0.00174941	NA	NA	1086	2246.66	NA	0.193579	0.0132246	0.0922597
Bcin01g02290.1	1	67.5299	1085	2214.99	1.11108e-15	2	39.0775	985	1589.43	1.28658e-08	12	135.281	781	1238.15	1.22737e-21	96	581.893	989	1633.1	1.17985e-69	2	4.58328	987	1628.51	0.132144	192	216.001	793	1373.43	0.159634	NA	NA	1086	2282.52	NA	0.202821	0.00159752	0.0752882
Bcin01g02300.1	1	199.172	1085	2049.69	7.90258e-44	2	29.6677	985	1474.58	1.13712e-06	12	12.3024	781	1163.43	0.453879	96	262.619	989	1787.07	3.39309e-17	2	282.827	987	1504.24	2.97534e-59	192	298.845	793	1175.73	9.1499e-06	NA	NA	1086	2248.86	NA	0.0939836	0.101215	0.106948	hypothetical protein BC1G_12912 [Botrytis cinerea B05.10]	C:membrane; C:integral component of membrane
Bcin01g02310.1	1	35.545	1085	2017.91	8.29334e-09	2	4.24842	985	1512.11	0.150371	12	59.2046	781	1208.97	1.1309e-07	96	487.254	989	1530.65	6.24357e-53	2	14.2925	987	1516.36	0.00166495	192	243.939	793	1268.17	0.0129602	NA	NA	1086	2053.45	NA	0.190706	0.00559393	0.0954754
Bcin01g02320.1	1	207.432	1085	2460.3	1.35076e-45	2	115.923	985	1665.71	1.23112e-24	12	130.585	781	1187.59	9.6543e-21	96	677.588	989	1782.71	3.51376e-87	2	1.07481	987	1781.63	0.624127	192	347.533	793	1318.18	1.74234e-09	NA	NA	1086	2667.73	NA	0.202483	0.000321186	0.103853
Bcin01g02330.1	1	0.0437485	1085	1902.44	0.860841	2	1.85464	985	1510.93	0.441185	12	44.5283	781	1230.6	3.13324e-05	96	373.434	989	1529	6.63798e-34	2	16.2179	987	1512.79	0.000692881	192	235.807	793	1275.12	0.0296373	NA	NA	1086	1902.48	NA	0.16292	0.00707545	0.102877
Bcin01g02340.1	1	86.7129	1085	1828.38	8.79166e-20	2	22.6854	985	1485.02	3.01893e-05	12	22.3874	781	1178.48	0.0460557	96	248.854	989	1579.53	2.57897e-15	2	71.8242	987	1507.71	3.25666e-15	192	284.154	793	1200.87	8.13883e-05	NA	NA	1086	1915.1	NA	0.111305	0.032125	0.127094
Bcin01g02350.1	1	0.0345935	1085	1295.54	0.875943	2	1.09145	985	1148.83	0.616685	12	7.93319	781	917.217	0.803309	96	114.507	989	1181.04	0.0993632	2	31.1111	987	1149.93	7.03857e-07	192	223.683	793	925.151	0.0885497	NA	NA	1086	1295.58	NA	0.0794528	0.021587	0.155207
Bcin01g02360.1	1	0.585021	1085	998.065	0.504384	2	0.579885	985	861.39	0.773467	12	19.7539	781	668.674	0.0924749	96	124.398	989	873.667	0.0288793	2	11.6968	987	861.97	0.00543424	192	172.962	793	688.428	0.930974	NA	NA	1086	998.65	NA	0.109627	0.0103079	0.152423
Bcin01g02400.1	1	1.14999	1085	1892.55	0.340203	2	61.5243	985	1541.06	2.81156e-13	12	60.7675	781	1227.05	6.05506e-08	96	267.797	989	1624.75	6.4585e-18	2	22.1684	987	1602.58	4.48365e-05	192	253.239	793	1287.82	0.00461907	NA	NA	1086	1893.7	NA	0.122637	0.0101519	0.11597
Bcin01g02410.1	1	12.821	1085	1679.41	0.000687412	2	57.7465	985	1423.26	1.73622e-12	12	71.2499	781	1134.71	8.86236e-10	96	176.29	989	1503.12	1.38235e-06	2	22.1145	987	1481.01	4.59606e-05	192	217.305	793	1205.96	0.145299	NA	NA	1086	1692.23	NA	0.0932435	0.0116968	0.114938
Bcin01g02410.2	1	2.31811	1085	1577.55	0.166088	2	39.2032	985	1348.65	1.2129e-08	12	41.7069	781	1074.86	8.742e-05	96	173.413	989	1404.14	2.71036e-06	2	16.2807	987	1387.86	0.000673132	192	232.091	793	1116.56	0.0425057	NA	NA	1086	1579.87	NA	0.0979977	0.00920039	0.131158
Bcin01g02420.1	1	170.209	1085	2133.25	1.19177e-37	2	23.1257	985	1517.06	2.46009e-05	12	18.7565	781	1257.67	0.118623	96	520.62	989	1612.63	9.51419e-59	2	72.446	987	1540.18	2.43014e-15	192	240.634	793	1276.42	0.0183049	NA	NA	1086	2303.46	NA	0.17974	0.0250114	0.0830769
Bcin01g02430.1	1	111.493	1085	2295.66	4.38123e-25	2	122.794	985	1572.87	4.50845e-26	12	105.222	781	1201.13	5.80611e-16	96	572.689	989	1722.97	5.33847e-68	2	27.3067	987	1695.66	4.12943e-06	192	266.517	793	1306.35	0.000910824	NA	NA	1086	2407.15	NA	0.190442	0.00908061	0.0886279
Bcin01g02440.1	1	1.37502	1085	1301.78	0.293723	2	12.8663	985	1051.94	0.00297561	12	13.338	781	798.681	0.379007	96	233.295	989	1068.49	2.91332e-13	2	3.68152	987	1064.81	0.197684	192	239.921	793	812.019	0.019711	NA	NA	1086	1303.16	NA	0.151477	0.00239039	0.155779
Bcin01g02460.1	1	46.3164	1085	2169.91	3.95824e-11	2	9.4941	985	1569.16	0.0140397	12	58.777	781	1184.46	1.33572e-07	96	583.44	989	1586.47	6.20151e-70	2	7.81453	987	1578.65	0.0312609	192	325.924	793	1243.23	1.00801e-07	NA	NA	1086	2216.22	NA	0.207816	0.00278347	0.116092
Bcin01g02470.1	1	33.184	1085	3992.99	2.66841e-08	2	104.652	985	1250.57	2.76767e-22	12	85.8471	781	840.57	2.17333e-12	96	2637.11	989	1355.88	0	2	0.651027	987	1355.23	0.753399	192	324.157	793	926.417	1.40086e-07	NA	NA	1086	4026.17	NA	0.395729	9.76941e-05	0.0486435	tannase subunit [Botrytis cinerea 1]	F:hydrolase activity
Bcin01g02490.1	1	343.099	1085	2060.67	1.24017e-74	2	136.922	985	1495.86	4.97098e-29	12	110.894	781	1161.42	5.17663e-17	96	414.011	989	1646.65	1.59555e-40	2	13.872	987	1632.78	0.00201238	192	223.549	793	1272.31	0.0895464	NA	NA	1086	2403.76	NA	0.146209	0.00489891	0.0789466
Bcin01g02500.1	1	165.734	1085	1926.57	1.09331e-36	2	56.4595	985	1460.22	3.22011e-12	12	47.0035	781	1187.71	1.25054e-05	96	365.508	989	1561.06	1.22488e-32	2	44.3839	987	1516.68	1.38706e-09	192	225.499	793	1234.72	0.0760582	NA	NA	1086	2092.3	NA	0.146075	0.017738	0.0901204
Bcin01g02510.1	1	43.0607	1085	2148.38	2.00112e-10	2	168.352	985	1531.73	1.26155e-35	12	96.6026	781	1209.75	2.30559e-14	96	436.64	989	1711.74	2.69901e-44	2	11.658	987	1700.08	0.00553493	192	225.371	793	1306.36	0.0768681	NA	NA	1086	2191.44	NA	0.165411	0.00441637	0.0853762
Bcin01g02510.2	1	31.2256	1085	2303.44	7.03632e-08	2	190.975	985	1580.39	2.31531e-40	12	124.152	781	1200.35	1.62348e-19	96	526.627	989	1776.81	8.3639e-60	2	5.45378	987	1771.36	0.0896029	192	255.887	793	1324.5	0.00336693	NA	NA	1086	2334.67	NA	0.183702	0.00190243	0.0892605
Bcin01g02540.1	1	2.48726	1085	2578.62	0.150819	2	171.188	985	1639.05	3.19597e-36	12	150.928	781	1185.18	1.20982e-24	96	698.944	989	1879.67	3.67607e-91	2	69.4381	987	1810.23	1.01077e-14	192	302.939	793	1336.11	4.80719e-06	NA	NA	1086	2581.1	NA	0.208672	0.020731	0.0904435
Bcin01g02550.1	1	7.28388	1085	2163.51	0.0113983	2	86.904	985	1565.13	1.41518e-18	12	106.335	781	1195.81	3.6486e-16	96	507.41	989	1656.1	1.9581e-56	2	4.0673	987	1652.03	0.166311	192	262.987	793	1302.14	0.00142813	NA	NA	1086	2170.79	NA	0.189172	0.00151636	0.0980465
Bcin01g02560.1	1	37.9177	1085	2230.38	2.54684e-09	2	16.3595	985	1718.25	0.000587495	12	134.736	781	1270.43	1.5575e-21	96	435.337	989	1795.04	4.46579e-44	2	60.4373	987	1734.61	7.36429e-13	192	313.076	793	1405.17	9.28724e-07	NA	NA	1086	2268.3	NA	0.157498	0.0218653	0.113266
Bcin01g02560.2	1	22.9131	1085	2248.02	4.33967e-06	2	30.9577	985	1651.62	6.17316e-07	12	124.856	781	1258.98	1.192e-19	96	506.456	989	1741.56	2.87101e-56	2	58.9852	987	1682.57	1.44879e-12	192	267.777	793	1383.84	0.000770383	NA	NA	1086	2270.93	NA	0.178558	0.020796	0.0944083
Bcin01g02570.1	1	7.74423	1085	1739.1	0.00899756	2	0.343975	985	1435.27	0.85826	12	30.0764	781	1112.53	0.00461295	96	294.735	989	1444.37	8.81251e-22	2	8.75757	987	1435.61	0.0205185	192	292.662	793	1142.61	2.34589e-05	NA	NA	1086	1746.85	NA	0.143749	0.00427128	0.142738
Bcin01g02580.1	1	163.763	1085	1951.08	2.89715e-36	2	20.6633	985	1402.18	7.85345e-05	12	29.9058	781	1169.3	0.00486468	96	511.954	989	1439.13	3.15413e-57	2	16.2879	987	1422.84	0.00067104	192	202.973	793	1199.21	0.358921	NA	NA	1086	2114.85	NA	0.193695	0.00616244	0.0767937
Bcin01g02590.1	1	0.250329	1085	899.885	0.668313	2	2.93795	985	794.871	0.270518	12	5.95083	781	618.166	0.923214	96	100.44	989	799.444	0.362571	2	1.63567	987	797.809	0.48772	192	170.754	793	624.117	0.955451	NA	NA	1086	900.135	NA	0.100219	0.00163206	0.170377
Bcin01g02600.1	1	294.491	1085	2032.83	3.17066e-64	2	104.77	985	1411.65	2.61669e-22	12	43.2842	781	1177.4	4.94795e-05	96	433.147	989	1599.69	1.03912e-43	2	83.2656	987	1516.42	1.51105e-17	192	190.969	793	1220.68	0.610239	NA	NA	1086	2327.32	NA	0.152316	0.0292803	0.0671544
Bcin01g02600.2	1	220.422	1085	2207.17	2.19132e-48	2	130.715	985	1427.09	9.79654e-28	12	81.7595	781	1146.89	1.18058e-11	96	499.383	989	1707.79	4.92374e-55	2	149.978	987	1557.81	2.20512e-31	192	198.442	793	1228.65	0.450277	NA	NA	1086	2427.59	NA	0.162298	0.0487425	0.0644929
Bcin01g02610.1	1	3.49235	1085	1886.76	0.0859957	2	1.83201	985	1561.16	0.445349	12	45.9656	781	1200.05	1.83891e-05	96	313.02	989	1573.74	1.69765e-24	2	10.75	987	1562.99	0.00837245	192	315.144	793	1246.02	6.48536e-07	NA	NA	1086	1890.26	NA	0.14138	0.00485543	0.14234
Bcin01g02620.1	1	3.69026	1085	1887.85	0.076965	2	9.44007	985	1581.59	0.014399	12	36.6499	781	1253.13	0.000521342	96	288.04	989	1599.81	8.37518e-21	2	8.7745	987	1591.03	0.0203823	192	291.813	793	1289.78	2.65961e-05	NA	NA	1086	1891.54	NA	0.131624	0.00400964	0.133349
Bcin01g02620.2	1	34.3242	1085	1718.64	1.52087e-08	2	32.5341	985	1473.45	2.92575e-07	12	37.3745	781	1203.62	0.000405922	96	201.065	989	1517.58	2.66864e-09	2	11.5886	987	1505.99	0.00571656	192	232.458	793	1241	0.0411338	NA	NA	1086	1752.97	NA	0.102291	0.00589565	0.118262
Bcin01g02630.1	1	118.767	1085	1876.43	1.22053e-26	2	48.3707	985	1547.62	1.52294e-10	12	61.3347	781	1205.24	4.8343e-08	96	265.797	989	1610.63	1.22702e-17	2	14.6385	987	1595.99	0.0014244	192	281.047	793	1266.58	0.000126798	NA	NA	1086	1995.2	NA	0.116802	0.00643274	0.123503
Bcin01g02630.2	1	86.7881	1085	2041.96	8.47674e-20	2	113.533	985	1563.37	3.89063e-24	12	86.9623	781	1177.63	1.35153e-12	96	322.21	989	1719.75	6.88791e-26	2	42.8495	987	1676.9	2.8593e-09	192	298.78	793	1264.59	9.21299e-06	NA	NA	1086	2128.75	NA	0.129204	0.0171823	0.119809
Bcin01g02640.1	1	3.19386	1085	1879.92	0.101229	2	6.71889	985	1570.95	0.0494575	12	20.3904	781	1233.68	0.078481	96	294.019	989	1585.9	1.1208e-21	2	8.23207	987	1577.67	0.0259092	192	316.876	793	1254.07	4.92238e-07	NA	NA	1086	1883.11	NA	0.13454	0.00376692	0.145
Bcin01g02650.1	1	4.28771	1085	1587.04	0.0555489	2	24.5455	985	1303.42	1.26495e-05	12	22.2561	781	1040.99	0.0477148	96	240.202	989	1346.83	3.65652e-14	2	18.8689	987	1327.96	0.000206978	192	240.171	793	1063.25	0.0192255	NA	NA	1086	1591.32	NA	0.129811	0.0101972	0.129795
Bcin01g02660.1	1	22.0307	1085	2028.02	6.75092e-06	2	68.2649	985	1574.58	1.10794e-14	12	83.9859	781	1273.44	4.69989e-12	96	384.494	989	1643.52	1.08955e-35	2	0.679436	987	1642.84	0.743944	192	217.153	793	1357.42	0.146882	NA	NA	1086	2050.05	NA	0.157889	0.000279004	0.0891717
Bcin01g02670.1	1	229.473	1085	1999.85	2.52103e-50	2	27.7991	985	1536.69	2.74369e-06	12	68.6105	781	1178.09	2.59887e-09	96	431.133	989	1568.72	2.25783e-43	2	4.22254	987	1564.49	0.155268	192	289.991	793	1246.7	3.48791e-05	NA	NA	1086	2229.32	NA	0.161796	0.00158464	0.108828
Bcin01g02680.1	1	129.45	1085	1967.59	6.38614e-29	2	51.6526	985	1517.53	3.19002e-11	12	94.2625	781	1162.42	6.2285e-14	96	387.401	989	1580.19	3.66675e-36	2	11.0109	987	1569.18	0.00744745	192	260.844	793	1256.68	0.00185248	NA	NA	1086	2097.04	NA	0.155243	0.00441236	0.104528
Bcin01g02690.1	1	20.5798	1085	2148.49	1.38972e-05	2	159.448	985	1596.58	9.16205e-34	12	121.721	781	1135.58	4.75731e-19	96	383.023	989	1765.47	1.88718e-35	2	9.44382	987	1756.02	0.0150228	192	339.271	793	1257.3	8.26119e-09	NA	NA	1086	2169.07	NA	0.149529	0.00368678	0.132448
Bcin01g02700.1	1	8.31624	1085	1048.96	0.00670814	2	19.0595	985	821.526	0.000166924	12	16.1379	781	637.24	0.216155	96	207.641	989	841.317	4.50288e-10	2	0.731934	987	840.585	0.727454	192	168.148	793	653.378	0.978201	NA	NA	1086	1057.27	NA	0.164059	0.000578308	0.132855
Bcin01g02700.2	1	19.8943	1085	1173.21	1.95736e-05	2	22.3845	985	946.728	3.48517e-05	12	28.3177	781	716.213	0.00807409	96	201.082	989	972.131	2.65679e-09	2	3.01881	987	969.112	0.265857	192	202.197	793	744.531	0.373629	NA	NA	1086	1193.11	NA	0.143917	0.0021606	0.144715
Bcin01g02720.1	1	13.3609	1085	1429.17	0.000523779	2	9.28915	985	1230.48	0.0154201	12	16.222	781	999.017	0.212258	96	179.115	989	1250.06	7.05838e-07	2	10.2957	987	1239.76	0.0102561	192	215.236	793	1015.24	0.168533	NA	NA	1086	1442.54	NA	0.109755	0.00630885	0.131889
Bcin01g02730.1	1	4.80378	1085	2044.22	0.0421308	2	20.942	985	1531.2	6.88386e-05	12	59.8456	781	1214.83	8.73764e-08	96	491.451	989	1552.77	1.17437e-53	2	0.63296	987	1552.14	0.758877	192	256.525	793	1274.67	0.00312481	NA	NA	1086	2049.03	NA	0.1934	0.000249088	0.10095
Bcin01g02740.1	1	0.0792486	1085	1811.31	0.812265	2	1.08547	985	1455.86	0.618322	12	46.2189	781	1110.85	1.67245e-05	96	340.279	989	1471.03	1.14125e-28	2	14.0819	987	1456.95	0.00182938	192	298.796	793	1157.07	9.21207e-06	NA	NA	1086	1811.39	NA	0.157119	0.00650211	0.137964
Bcin01g02750.1	1	131.406	1085	1712.37	2.44256e-29	2	50.5291	985	1302.4	5.45262e-11	12	66.3143	781	1047.82	6.55728e-09	96	344.945	989	1367.42	2.13867e-29	2	14.4883	987	1352.93	0.00152436	192	188.269	793	1114.14	0.666153	NA	NA	1086	1843.77	NA	0.156565	0.00657598	0.0854521
Bcin01g02760.1	1	64.5736	1085	1765.16	4.76729e-15	2	124.603	985	1249.3	1.89293e-26	12	23.015	781	984.009	0.0387807	96	296.63	989	1468.53	4.6507e-22	2	94.626	987	1373.91	6.54055e-20	192	242.28	793	1007.02	0.0153951	NA	NA	1086	1829.74	NA	0.133558	0.0426053	0.109086
Bcin01g02770.1	1	1.23179	1085	1949.99	0.321829	2	29.9463	985	1482.47	9.98058e-07	12	16.721	781	1169.96	0.190546	96	383.678	989	1566.32	1.47753e-35	2	53.8971	987	1512.42	1.5555e-11	192	295.794	793	1186.68	1.45429e-05	NA	NA	1086	1951.23	NA	0.160615	0.0225624	0.123825
Bcin01g02780.1	1	11.0119	1085	2121.71	0.00171247	2	2.66887	985	1573.97	0.305836	12	85.4891	781	1182.66	2.51863e-12	96	514.531	989	1607.18	1.11537e-57	2	30.5351	987	1576.64	9.17799e-07	192	305.827	793	1268.15	3.03219e-06	NA	NA	1086	2132.72	NA	0.192148	0.0114031	0.114209
Bcin01g02790.1	1	396.376	1085	1804.56	4.91422e-86	2	43.1078	985	1376.54	1.89847e-09	12	25.334	781	1140.19	0.019951	96	363.814	989	1440.74	2.27835e-32	2	21.0932	987	1419.65	7.41896e-05	192	211.017	793	1165.52	0.224718	NA	NA	1086	2200.93	NA	0.140695	0.00815719	0.0816048
Bcin01g02800.1	1	27.8537	1085	2150.77	3.71822e-07	2	47.3172	985	1540.94	2.53781e-10	12	99.7445	781	1181.25	6.09932e-15	96	480.626	989	1670.14	8.72158e-52	2	81.8858	987	1588.26	2.89852e-17	192	259.944	793	1281	0.00206664	NA	NA	1086	2178.62	NA	0.175338	0.029873	0.0948308
Bcin01g02810.1	1	8.10183	1085	1597.31	0.00748077	2	41.1857	985	1381.82	4.72612e-09	12	36.405	781	1147.93	0.000566553	96	154.341	989	1442.96	0.000170798	2	19.9563	987	1423.01	0.000125964	192	197.484	793	1184.34	0.470521	NA	NA	1086	1605.41	NA	0.0867229	0.0112133	0.110965
Bcin01g02820.1	1	0.393597	1085	984.98	0.586933	2	19.5898	985	849.643	0.000130109	12	16.1069	781	687.31	0.217554	96	113.53	989	871.45	0.110647	2	2.21748	987	869.233	0.379238	192	146.226	793	703.417	1	NA	NA	1086	985.374	NA	0.103104	0.00201384	0.132798
Bcin01g02830.1	1	25.7365	1085	2006.54	1.06364e-06	2	29.6256	985	1634.7	1.16053e-06	12	68.632	781	1219.4	2.57866e-09	96	338.098	989	1668.44	2.49019e-28	2	4.11347	987	1664.33	0.163004	192	346.67	793	1288.03	2.05009e-09	NA	NA	1086	2032.28	NA	0.142388	0.00173236	0.145998
Bcin01g02840.1	1	0.743437	1085	2201.68	0.44969	2	80.308	985	1558.69	3.44667e-17	12	168.977	781	1183.61	3.9212e-28	96	544.319	989	1657.36	6.17095e-63	2	18.3647	987	1639	0.00026101	192	206.103	793	1352.59	0.301757	NA	NA	1086	2202.43	NA	0.196853	0.00664156	0.0745371
Bcin01g02870.1	1	30.7513	1085	2449.47	8.90754e-08	2	157.12	985	1687.3	2.80615e-33	12	163.371	781	1183.08	4.76959e-27	96	553.889	989	1895.58	1.22667e-64	2	51.1622	987	1844.42	5.61179e-11	192	340.842	793	1346.45	6.24459e-09	NA	NA	1086	2480.22	NA	0.179527	0.0165827	0.110474
Bcin01g02880.1	1	59.9415	1085	2295.73	4.70306e-14	2	216.716	985	1547.92	9.20342e-46	12	166.433	781	1184.61	1.21817e-27	96	516.931	989	1778.8	4.25388e-58	2	14.1644	987	1764.64	0.00176225	192	196.877	793	1351.04	0.482789	NA	NA	1086	2355.67	NA	0.179069	0.00490665	0.0681998
Bcin01g02890.1	1	2.13014	1085	1925.84	0.185716	2	21.8914	985	1481.5	4.40329e-05	12	36.6207	781	1240.81	0.000526568	96	399.829	989	1526.01	3.45803e-38	2	22.6218	987	1503.39	3.63946e-05	192	204.067	793	1277.43	0.338123	NA	NA	1086	1927.97	NA	0.17011	0.00962457	0.0868212
Bcin01g02900.1	1	15.022	1085	1995.75	0.000226693	2	32.4985	985	1393.99	2.97726e-07	12	64.6381	781	1128.4	1.29437e-08	96	566.654	989	1429.1	6.43691e-67	2	2.60755	987	1426.49	0.319191	192	200.954	793	1193.04	0.398583	NA	NA	1086	2010.77	NA	0.21963	0.00101067	0.0778881
Bcin01g02910.1	1	2.29521	1085	2334.86	0.168318	2	21.1044	985	1580	6.372e-05	12	110.692	781	1203.99	5.65218e-17	96	720.226	989	1614.63	3.85253e-95	2	13.5239	987	1601.11	0.00235552	192	265.321	793	1314.68	0.00106523	NA	NA	1086	2337.15	NA	0.234532	0.00440389	0.0863982
Bcin01g02920.1	1	9.01343	1085	2104.87	0.00469283	2	101.389	985	1503.52	1.32684e-21	12	102.28	781	1183.12	2.05085e-15	96	446.851	989	1658.02	5.08881e-46	2	53.1114	987	1604.9	2.24694e-11	192	218.113	793	1285.4	0.137071	NA	NA	1086	2113.88	NA	0.170956	0.0203193	0.0834452
Bcin01g02930.1	1	1.54557	1085	1713.25	0.264186	2	0.63359	985	1418.38	0.755581	12	25.2292	781	1165.13	0.0205947	96	276.933	989	1436.32	3.30665e-19	2	17.2971	987	1419.02	0.000424577	192	228.021	793	1190.36	0.0613184	NA	NA	1086	1714.79	NA	0.137845	0.00860969	0.113498
Bcin01g02940.1	1	10.4264	1085	2522.16	0.00229977	2	217.982	985	1650.08	5.05857e-46	12	175.882	781	1183.02	1.90978e-29	96	595.424	989	1926.74	4.20821e-72	2	58.6766	987	1868.06	1.67213e-12	192	291.177	793	1358.9	2.9299e-05	NA	NA	1086	2532.59	NA	0.186847	0.018413	0.0913727
Bcin01g02950.1	1	47.7339	1085	2224.78	1.96878e-11	2	27.7356	985	1499.37	2.825e-06	12	52.4044	781	1160.54	1.611e-06	96	662.249	989	1562.53	2.41997e-84	2	35.428	987	1527.1	9.34954e-08	192	286.424	793	1212.94	5.87766e-05	NA	NA	1086	2272.51	NA	0.222965	0.0119279	0.096433
Bcin01g02960.1	1	71.7476	1085	2004.43	1.39635e-16	2	10.4606	985	1658.51	0.00899792	12	104.354	781	1246.61	8.43645e-16	96	295.169	989	1709.26	7.60811e-22	2	40.2892	987	1668.97	9.56085e-09	192	307.549	793	1350.96	2.2907e-06	NA	NA	1086	2076.18	NA	0.122394	0.0167062	0.127527
Bcin01g02970.1	1	9.45201	1085	1910.85	0.00377368	2	8.21038	985	1515.12	0.0252581	12	38.4241	781	1189.16	0.000280724	96	372.632	989	1538.21	8.93473e-34	2	14.8834	987	1523.33	0.00127595	192	287.535	793	1227.59	4.96696e-05	NA	NA	1086	1920.3	NA	0.161465	0.00644912	0.124592
Bcin01g02980.1	1	39.105	1085	1733.39	1.41768e-09	2	18.7218	985	1483.86	0.000195404	12	32.624	781	1178.8	0.00202646	96	228.829	989	1504.56	1.09185e-12	2	1.9772	987	1502.58	0.420721	192	272.43	793	1211.43	0.000418034	NA	NA	1086	1772.49	NA	0.114226	0.000986975	0.135991
Bcin01g02990.1	1	92.4042	1085	1794.73	5.29064e-21	2	33.1464	985	1540.55	2.18291e-07	12	11.6902	781	1194.02	0.501554	96	164.505	989	1630.22	2.01527e-05	2	56.5274	987	1573.69	4.59164e-12	192	334.838	793	1205.71	1.96407e-08	NA	NA	1086	1887.13	NA	0.0780325	0.0268136	0.158829
Bcin01g03000.1	1	97.8221	1085	1979.16	3.66015e-22	2	22.1674	985	1388.31	3.86568e-05	12	23.8198	781	1155.1	0.0309274	96	449.693	989	1529.47	1.68266e-46	2	118.988	987	1410.48	5.81316e-25	192	209.393	793	1178.92	0.248587	NA	NA	1086	2076.98	NA	0.169974	0.0449746	0.0791458
Bcin01g03010.1	1	8.41028	1085	2041.66	0.00638392	2	0.283163	985	1594.32	0.882335	12	94.7331	781	1232.54	5.11407e-14	96	430.518	989	1611.15	2.86179e-43	2	16.5428	987	1594.6	0.000597582	192	267.049	793	1327.27	0.000849882	NA	NA	1086	2050.07	NA	0.172405	0.0066247	0.106942
Bcin01g03020.1	1	35.9893	1085	1981.78	6.65456e-09	2	42.7527	985	1509.44	2.23899e-09	12	75.8496	781	1136.44	1.36896e-10	96	428.527	989	1553.26	6.16202e-43	2	1.0586	987	1552.2	0.628463	192	297.151	793	1212.29	1.18548e-05	NA	NA	1086	2017.77	NA	0.175098	0.00043255	0.121417
Bcin01g03030.1	1	42.2734	1085	1795.02	2.9453e-10	2	1.06913	985	1502.41	0.622466	12	27.0863	781	1227.9	0.0117822	96	283.313	989	1511.7	4.04597e-20	2	8.22107	987	1503.48	0.0260387	192	247.426	793	1254.99	0.00893435	NA	NA	1086	1837.29	NA	0.133084	0.00386179	0.116226
Bcin01g03050.1	1	60.5468	1085	2139.02	3.49066e-14	2	118.694	985	1635.62	3.23316e-25	12	145.216	781	1214.92	1.47351e-23	96	381.77	989	1757.25	3.01148e-35	2	2.93626	987	1754.31	0.275703	192	275.481	793	1360.14	0.000277565	NA	NA	1086	2199.57	NA	0.147728	0.0011362	0.106599
Bcin01g03060.1	1	30.9778	1085	1856.35	7.9601e-08	2	48.8728	985	1507.46	1.19987e-10	12	51.738	781	1190.79	2.08079e-06	96	275.001	989	1581.35	6.21701e-19	2	25.0175	987	1556.33	1.20338e-05	192	264.937	793	1242.52	0.00111928	NA	NA	1086	1887.33	NA	0.125723	0.0114374	0.121123
Bcin01g03070.1	1	1.63494	1085	1688.65	0.250004	2	1.99021	985	1399.12	0.415113	12	17.4704	781	1145.08	0.161096	96	279.6	989	1409.05	1.3763e-19	2	7.94638	987	1401.11	0.0294591	192	236.566	793	1162.55	0.0275224	NA	NA	1086	1690.29	NA	0.141367	0.00401772	0.119609
Bcin01g03110.1	1	2.0703	1085	1855.94	0.192249	2	6.61333	985	1571.74	0.0518757	12	22.5707	781	1272.13	0.0437993	96	260.671	989	1595.27	6.31093e-17	2	16.9186	987	1578.35	0.000504621	192	277.04	793	1294.7	0.000224679	NA	NA	1086	1858.01	NA	0.12206	0.00792215	0.129724
Bcin01g03110.2	1	0.501345	1085	1280.24	0.537244	2	0.0295459	985	1166.18	0.986717	12	12.0822	781	962.416	0.470905	96	95.7631	989	1184.48	0.491006	2	18.2724	987	1166.21	0.000271992	192	191.681	793	974.498	0.595107	NA	NA	1086	1280.75	NA	0.0686581	0.0131006	0.137428
Bcin01g03120.1	1	32.9273	1085	1413.82	3.03345e-08	2	19.6385	985	1179.07	0.000127271	12	64.0491	781	916.651	1.63381e-08	96	214.827	989	1198.99	6.11196e-11	2	0.282288	987	1198.71	0.884077	192	198.369	793	980.701	0.451674	NA	NA	1086	1446.74	NA	0.129269	0.000169863	0.119366
Bcin01g03130.1	1	3.03588	1085	1749.37	0.110737	2	5.59075	985	1531.76	0.0819739	12	16.8544	781	1243.26	0.185104	96	187.73	989	1561.64	8.4955e-08	2	24.2866	987	1537.35	1.6812e-05	192	271.639	793	1260.12	0.00046569	NA	NA	1086	1752.4	NA	0.0955651	0.0123633	0.13828
Bcin01g03140.1	1	0.770173	1085	1283.2	0.44118	2	1.18981	985	1148.88	0.590681	12	12.6615	781	957.045	0.426898	96	131.199	989	1152	0.0106812	2	1.92832	987	1150.07	0.429509	192	179.171	793	969.707	0.841558	NA	NA	1086	1283.97	NA	0.0925835	0.00136076	0.126435
Bcin01g03150.1	1	0.304031	1085	816.026	0.634616	2	3.27353	985	721.767	0.232948	12	26.1777	781	542.556	0.0155283	96	87.7041	989	728.322	0.716734	2	3.2814	987	725.04	0.236548	192	153.033	793	568.734	1	NA	NA	1086	816.33	NA	0.0966633	0.0036166	0.168666
Bcin01g03150.2	1	0.128001	1085	908.69	0.762047	2	0.0318624	985	823.698	0.985894	12	21.4563	781	645.749	0.0593761	96	83.5782	989	825.111	0.814318	2	1.38157	987	823.73	0.54542	192	156.492	793	667.206	1	NA	NA	1086	908.818	NA	0.0841015	0.00139022	0.157472
Bcin01g03150.3	1	0.401823	1085	767.69	0.582964	2	1.16247	985	684.095	0.597912	12	14.365	781	549.158	0.312397	96	82.1741	989	685.516	0.84269	2	0.25882	987	685.257	0.892945	192	120.572	793	563.523	1	NA	NA	1086	768.092	NA	0.0966158	0.000304306	0.141762
Bcin01g03160.1	1	46.7189	1085	2238.91	3.24663e-11	2	49.7526	985	1565.42	7.90413e-11	12	53.84	781	1217.68	9.23174e-07	96	581.819	989	1657.09	1.21451e-69	2	41.9227	987	1615.17	4.42123e-09	192	293.896	793	1271.52	1.94557e-05	NA	NA	1086	2285.63	NA	0.199981	0.0144095	0.101017
Bcin01g03170.1	1	8.17549	1085	2043.6	0.00721053	2	22.2623	985	1546.53	3.69371e-05	12	63.9326	781	1229.04	1.7107e-08	96	474.306	989	1569.29	1.07193e-50	2	0.498579	987	1568.79	0.804931	192	253.555	793	1292.98	0.0044509	NA	NA	1086	2051.77	NA	0.187727	0.000197334	0.100355
Bcin01g03180.1	1	5.38911	1085	1424.42	0.0308544	2	15.1929	985	1249.44	0.00100618	12	30.344	781	1000.43	0.00424202	96	159.619	989	1264.8	5.74864e-05	2	0.170609	987	1264.63	0.92904	192	218.668	793	1030.77	0.131371	NA	NA	1086	1429.81	NA	0.100414	0.000107328	0.137561
Bcin01g03190.1	1	72.9349	1085	3117.36	7.77043e-17	2	5.84747	985	1678.31	0.0732102	12	71.164	781	1170.98	9.17359e-10	96	1267.21	989	1850.15	1.04802e-201	2	165.997	987	1684.16	9.28206e-35	192	436.16	793	1242.15	1.05563e-18	NA	NA	1086	3190.3	NA	0.27408	0.0359029	0.0943354
Bcin01g03200.1	1	44.7466	1085	2104.08	8.62821e-11	2	17.5574	985	1495.73	0.000336684	12	43.7133	781	1140.39	4.22821e-05	96	584.905	989	1519.17	3.36535e-70	2	5.88638	987	1513.28	0.074105	192	311.619	793	1184.11	1.18389e-06	NA	NA	1086	2148.82	NA	0.213499	0.00214862	0.113746
Bcin01g03210.1	1	0.125927	1085	2230.39	0.763656	2	2.25539	985	1720.41	0.368739	12	174.846	781	1204.97	3.0499e-29	96	507.342	989	1723.05	2.01111e-56	2	0.38475	987	1722.67	0.845581	192	340.598	793	1379.81	6.5125e-09	NA	NA	1086	2230.52	NA	0.18528	0.00014051	0.124385
Bcin01g03220.1	1	0.318242	1085	1779.48	0.626564	2	8.36558	985	1498.15	0.0235544	12	28.5702	781	1206.08	0.00746516	96	257.508	989	1521.98	1.71583e-16	2	15.4577	987	1506.52	0.00098254	192	263.504	793	1234.65	0.00134311	NA	NA	1086	1779.8	NA	0.125444	0.00753019	0.128365
Bcin01g03230.1	1	64.7539	1085	1948.31	4.35995e-15	2	29.8056	985	1565.42	1.06606e-06	12	50.1904	781	1258.79	3.75278e-06	96	349.245	989	1599.06	4.53619e-30	2	3.84101	987	1595.22	0.18389	192	256.437	793	1308.98	0.00315838	NA	NA	1086	2013.06	NA	0.147601	0.00162332	0.108378
Bcin01g03240.1	1	9.06081	1085	1203.37	0.00458011	2	3.51366	985	923.071	0.208664	12	9.75163	781	756.148	0.660064	96	276.046	989	927.327	4.4206e-19	2	0.742699	987	926.584	0.724121	192	157.171	793	765.9	1	NA	NA	1086	1212.43	NA	0.185363	0.000498716	0.105539
Bcin01g03250.1	1	0.197993	1085	1664.4	0.704697	2	2.92501	985	1483.08	0.272101	12	38.8811	781	1180.82	0.000239298	96	175.413	989	1488.99	1.69961e-06	2	2.98636	987	1486	0.269786	192	263.376	793	1219.7	0.00136248	NA	NA	1086	1664.6	NA	0.0951781	0.00162038	0.142907
Bcin01g03260.1	1	0.555641	1085	2119.31	0.515363	2	11.3655	985	1583.33	0.00594846	12	74.5828	781	1228.58	2.29645e-10	96	510.944	989	1608.36	4.72662e-57	2	13.6688	987	1594.69	0.0022069	192	280.168	793	1303.16	0.000144471	NA	NA	1086	2119.86	NA	0.193212	0.00516882	0.105945
Bcin01g03270.1	1	6.72987	1085	2376.04	0.0152131	2	35.9893	985	1572.25	5.63868e-08	12	16.1282	781	1184.31	0.216576	96	758.099	989	1617.94	2.84418e-102	2	9.69427	987	1608.24	0.0134255	192	371.819	793	1200.43	1.05821e-11	NA	NA	1086	2382.77	NA	0.240624	0.003077	0.118017
Bcin01g03290.1	1	5.71283	1085	1237.57	0.0259812	2	0.303481	985	1034.22	0.874049	12	15.3819	781	830.267	0.254741	96	202.989	989	1034.58	1.5943e-09	2	0.0540196	987	1034.53	0.977246	192	188.574	793	845.649	0.659967	NA	NA	1086	1243.28	NA	0.140348	3.73496e-05	0.130381
Bcin01g03360.1	1	174.093	1085	1960.97	1.78226e-38	2	25.6508	985	1234.11	7.55621e-06	12	69.0789	781	935.681	2.15725e-09	96	689.516	989	1271.45	2.12071e-89	2	11.6931	987	1259.76	0.00544321	192	229.349	793	1004.76	0.054503	NA	NA	1086	2135.06	NA	0.243107	0.0041227	0.0808628
Bcin01g03370.1	1	9.21648	1085	1125.59	0.00423334	2	9.40179	985	906.51	0.0146518	12	17.25	781	724.067	0.169344	96	209.123	989	916.463	2.99655e-10	2	0.551416	987	915.911	0.786482	192	165.192	793	741.317	0.998529	NA	NA	1086	1134.8	NA	0.155542	0.000410134	0.122867
Bcin01g03390.1	1	13.4163	1085	2289.02	0.000509553	2	169.518	985	1627.79	7.18275e-36	12	174.576	781	1207.54	3.41839e-29	96	480.225	989	1808.8	1.02351e-51	2	11.491	987	1797.31	0.00598299	192	245.677	793	1382.11	0.0107864	NA	NA	1086	2302.44	NA	0.171868	0.00411253	0.0879254
Bcin01g03390.2	1	9.16864	1085	2229.52	0.00433637	2	135.715	985	1613.8	8.85341e-29	12	162.097	781	1212.69	8.43569e-27	96	454.098	989	1775.42	3.01983e-47	2	25.9088	987	1749.51	7.9237e-06	192	239.013	793	1374.78	0.0216044	NA	NA	1086	2238.69	NA	0.167028	0.00952985	0.0879146
Bcin01g03400.1	1	294.394	1085	2190.5	3.30734e-64	2	87.6765	985	1475.72	9.75028e-19	12	58.3907	781	1175.28	1.55957e-07	96	570.369	989	1620.13	1.39465e-67	2	56.7389	987	1563.39	4.14231e-12	192	242.052	793	1233.67	0.015768	NA	NA	1086	2484.9	NA	0.18328	0.0182323	0.0777802
Bcin01g03410.1	1	2.73526	1085	1825.16	0.131137	2	63.8145	985	1488.92	9.29772e-14	12	59.3769	781	1211.49	1.05486e-07	96	252.115	989	1573.05	9.33273e-16	2	20.3145	987	1552.73	0.00010659	192	218.054	793	1270.87	0.13768	NA	NA	1086	1827.9	NA	0.120036	0.00967204	0.103819
Bcin01g03410.2	1	0.977698	1085	1261.78	0.381581	2	18.4328	985	1109.3	0.00022295	12	37.1149	781	867.07	0.000443717	96	131.256	989	1130.52	0.0105889	2	2.78834	987	1127.73	0.294626	192	205.117	793	904.185	0.319249	NA	NA	1086	1262.76	NA	0.0939692	0.00199623	0.146847
Bcin01g03410.3	1	0.272541	1085	1313.8	0.65351	2	28.5879	985	1107.48	1.88892e-06	12	20.9393	781	914.984	0.0680562	96	175.856	989	1137.94	1.53156e-06	2	1.88019	987	1136.06	0.438535	192	171.552	793	935.923	0.947417	NA	NA	1086	1314.07	NA	0.117881	0.00126034	0.114996
Bcin01g03410.4	1	1.48058	1085	1162.02	0.274985	2	22.2532	985	1020.79	3.70853e-05	12	20.975	781	839.156	0.0674321	96	118.435	989	1043.58	0.0626854	2	0.537214	987	1043.05	0.791645	192	160.663	793	860.131	1	NA	NA	1086	1163.5	NA	0.0923491	0.000418889	0.125276
Bcin01g03420.1	1	1.88211	1085	1967.8	0.215056	2	69.1764	985	1531.19	7.18978e-15	12	65.5221	781	1210.47	9.01812e-09	96	310.027	989	1657.77	4.76795e-24	2	57.4054	987	1600.36	3.03638e-12	192	255.192	793	1275.99	0.00366024	NA	NA	1086	1969.68	NA	0.132654	0.0245626	0.109191
Bcin01g03430.1	1	3.87994	1085	1368.47	0.069348	2	5.22327	985	1192.04	0.0965312	12	5.70447	781	999.75	0.934165	96	162.496	989	1205.97	3.11841e-05	2	8.70665	987	1197.27	0.0209776	192	186.589	793	1005.45	0.702239	NA	NA	1086	1372.35	NA	0.105274	0.00564066	0.120883
Bcin01g03440.1	1	53.1894	1085	1918.6	1.31831e-12	2	8.02737	985	1497.98	0.0274564	12	32.8771	781	1218.02	0.00186285	96	376.744	989	1541.86	1.94852e-34	2	35.8507	987	1506.01	7.65582e-08	192	247.082	793	1250.9	0.0092761	NA	NA	1086	1971.79	NA	0.158005	0.0150356	0.103625
Bcin01g03460.1	1	16.2538	1085	1817.72	0.000121701	2	1.19398	985	1524.97	0.589584	12	33.3683	781	1197.76	0.00158433	96	247.438	989	1570.28	3.99204e-15	2	44.1189	987	1526.16	1.57338e-09	192	293.834	793	1231.13	1.9648e-05	NA	NA	1086	1833.97	NA	0.116413	0.0207567	0.138241
Bcin01g03470.1	1	12.2017	1085	2054.31	0.000938547	2	73.9904	985	1536.12	7.19077e-16	12	43.3505	781	1246.73	4.83171e-05	96	324.278	989	1730.03	3.33136e-26	2	119.912	987	1610.12	3.79334e-25	192	246.041	793	1290.08	0.010382	NA	NA	1086	2066.51	NA	0.129159	0.0477603	0.0979972
Bcin01g03470.2	1	10.3826	1085	2070.39	0.00234891	2	74.7112	985	1560.74	5.07441e-16	12	74.5179	781	1228.21	2.35692e-10	96	302.295	989	1768.1	6.76052e-23	2	132.65	987	1635.45	8.66593e-28	192	258.009	793	1302.73	0.0026115	NA	NA	1086	2080.78	NA	0.120162	0.0527285	0.102559
Bcin01g03480.1	1	89.1813	1085	2173.49	2.6027e-20	2	73.5998	985	1553.69	8.68677e-16	12	98.5177	781	1211.52	1.02048e-14	96	464.843	989	1708.65	4.49944e-49	2	81.3627	987	1627.29	3.69528e-17	192	243.653	793	1310.04	0.0133698	NA	NA	1086	2262.68	NA	0.16549	0.0289662	0.0867438
Bcin01g03490.1	1	35.7522	1085	1949.1	7.48606e-09	2	10.603	985	1597.92	0.00842221	12	75.565	781	1249.9	1.53725e-10	96	317.048	989	1632.05	4.18265e-25	2	23.5276	987	1608.52	2.38266e-05	192	272.452	793	1325.46	0.000417819	NA	NA	1086	1984.85	NA	0.13634	0.0101175	0.117162
Bcin01g03500.1	1	40.4148	1085	2151.59	7.42219e-10	2	28.8058	985	1546.43	1.70456e-06	12	50.4765	781	1236.64	3.37275e-06	96	548.503	989	1603.09	1.1107e-63	2	27.8483	987	1575.24	3.21179e-06	192	259.311	793	1287.12	0.0022317	NA	NA	1086	2192	NA	0.198133	0.0100595	0.0936697
Bcin01g03530.1	1	3.58635	1085	1053.15	0.0815758	2	8.76486	985	847.371	0.0195984	12	12.7706	781	666.538	0.419116	96	193.772	989	859.383	1.81349e-08	2	3.24677	987	856.136	0.240331	192	168.063	793	679.308	0.978798	NA	NA	1086	1056.74	NA	0.154553	0.00258963	0.134047
Bcin01g03560.1	1	0.118655	1085	923.366	0.770675	2	3.14958	985	623.043	0.246114	12	13.7385	781	483.965	0.35195	96	289.47	989	633.896	5.18751e-21	2	7.70321	987	626.193	0.0328729	192	125.34	793	497.703	1	NA	NA	1086	923.484	NA	0.237143	0.0063107	0.102682
Bcin01g03580.1	1	76.5038	1085	2118.57	1.33802e-17	2	41.6577	985	1645.02	3.76632e-09	12	144.499	781	1224.97	2.02716e-23	96	430.618	989	1687.95	2.75285e-43	2	1.27319	987	1686.68	0.571771	192	275.553	793	1369.47	0.000274791	NA	NA	1086	2195.07	NA	0.163922	0.000484662	0.104894
Bcin01g03590.1	1	5.24277	1085	1477.4	0.0333229	2	9.91789	985	1292.68	0.0115357	12	4.9879	781	1048.21	0.960555	96	159.219	989	1318.18	6.25511e-05	2	15.5796	987	1302.6	0.000929584	192	239.484	793	1053.2	0.0206101	NA	NA	1086	1482.64	NA	0.0960629	0.00939982	0.14449
Bcin01g03590.2	1	4.02636	1085	1444.58	0.0639902	2	16.7188	985	1283.47	0.000496102	12	9.34591	781	1084.19	0.69376	96	137.262	989	1307.31	0.00401816	2	7.12981	987	1300.18	0.0423559	192	189.934	793	1093.53	0.632736	NA	NA	1086	1448.6	NA	0.0861657	0.00447573	0.119231
Bcin01g03600.1	1	2.58075	1085	1304.93	0.143035	2	3.87725	985	1160.85	0.177539	12	19.4485	781	981.446	0.0998358	96	132.246	989	1172.68	0.00908071	2	7.95207	987	1164.73	0.0293853	192	159.959	793	1000.89	1	NA	NA	1086	1307.51	NA	0.0913484	0.00549287	0.110492
Bcin01g03600.2	1	0.519494	1085	1357.25	0.52984	2	24.8505	985	1190.94	1.09983e-05	12	23.1133	781	978.698	0.0376978	96	139.417	989	1217.84	0.0027823	2	2.04073	987	1215.79	0.409163	192	189.132	793	1001.81	0.648839	NA	NA	1086	1357.77	NA	0.0929922	0.00136119	0.126153
Bcin01g03610.1	1	0.313208	1085	1518.45	0.62956	2	2.54403	985	1373.76	0.323832	12	15.6158	781	1114.94	0.242245	96	134.022	989	1384.43	0.00684901	2	8.11811	987	1376.31	0.0272697	192	243.205	793	1130.56	0.013963	NA	NA	1086	1518.76	NA	0.0806923	0.00488777	0.146429
Bcin01g03610.2	1	3.13406	1085	1444.14	0.10465	2	0.653167	985	1302.06	0.749226	12	13.5935	781	1078.51	0.361268	96	139.276	989	1304.87	0.00284967	2	2.14939	987	1302.72	0.390582	192	209.957	793	1092.11	0.240158	NA	NA	1086	1447.28	NA	0.0876664	0.00135292	0.132156
Bcin01g03630.1	1	1.3739	1085	1718.16	0.293918	2	2.65766	985	1451.73	0.3074	12	69.5296	781	1121.41	1.79997e-09	96	249.053	989	1469.11	2.42545e-15	2	14.7226	987	1454.39	0.00137114	192	260.787	793	1190.94	0.00186509	NA	NA	1086	1719.54	NA	0.125574	0.00742326	0.131491
Bcin01g03640.1	1	37.7185	1085	1994.7	2.81324e-09	2	0.45254	985	1462.15	0.818757	12	68.541	781	1156.12	2.67244e-09	96	520.837	989	1473.86	8.72259e-59	2	11.2592	987	1462.6	0.00664601	192	237.496	793	1224.66	0.0251447	NA	NA	1086	2032.42	NA	0.203094	0.00439038	0.0926084
Bcin01g03650.1	1	47.1832	1085	1900.98	2.58165e-11	2	49.1348	985	1527.15	1.05536e-10	12	84.2626	781	1179.61	4.18851e-12	96	317.559	989	1583.42	3.50187e-25	2	7.13689	987	1576.29	0.0422471	192	263.279	793	1263.87	0.00137977	NA	NA	1086	1948.17	NA	0.139718	0.00314005	0.115836
Bcin01g03660.1	1	45.6464	1085	1532.84	5.51854e-11	2	1.51317	985	1305.89	0.512548	12	14.6614	781	1037.4	0.29502	96	224.152	989	1308.69	4.2802e-12	2	1.29138	987	1307.4	0.567387	192	253.825	793	1052.06	0.00430862	NA	NA	1086	1578.49	NA	0.124257	0.000715868	0.140707
Bcin01g03670.1	1	3.43735	1085	1088.57	0.0886769	2	8.20967	985	934.909	0.0252629	12	9.58704	781	754.872	0.674215	96	131.809	989	956.762	0.0097146	2	13.643	987	943.119	0.00223215	192	170.451	793	764.459	0.958685	NA	NA	1086	1092.01	NA	0.106516	0.011025	0.137742
Bcin01g03680.1	1	0.275708	1085	1520.41	0.65153	2	4.53597	985	1318.35	0.132053	12	21.0848	781	1040.19	0.0655168	96	194.457	989	1325.95	1.51791e-08	2	3.06825	987	1322.88	0.260242	192	257.073	793	1061.27	0.00292288	NA	NA	1086	1520.68	NA	0.113174	0.00178573	0.149617
Bcin01g03690.1	1	1.23538	1085	1839.63	0.321074	2	2.15365	985	1575.27	0.385546	12	46.4435	781	1236.54	1.54151e-05	96	244.78	989	1594.85	9.055e-15	2	17.4206	987	1577.42	0.000401759	192	292.288	793	1282.98	2.47614e-05	NA	NA	1086	1840.86	NA	0.116392	0.00828347	0.138982
Bcin01g03710.1	1	33.9978	1085	1957.23	1.78671e-08	2	36.0102	985	1461.67	5.5825e-08	12	51.6305	781	1153.55	2.16904e-06	96	402.341	989	1554.89	1.33771e-38	2	57.2144	987	1497.68	3.31848e-12	192	256.484	793	1205.18	0.00313963	NA	NA	1086	1991.23	NA	0.164168	0.0233454	0.104654
Bcin01g03720.1	1	38.9599	1085	1558.68	1.52071e-09	2	44.5159	985	1308.48	9.67552e-10	12	37.8466	781	1049.47	0.000343724	96	189.448	989	1369.23	5.50519e-08	2	16.2428	987	1352.99	0.000684962	192	221.155	793	1087.32	0.108483	NA	NA	1086	1597.64	NA	0.105054	0.00900712	0.122637
Bcin01g03730.1	1	14.9025	1085	1889.96	0.000240792	2	23.6142	985	1482.45	1.95973e-05	12	45.6659	781	1174.7	2.05693e-05	96	377.54	989	1512.42	1.45206e-34	2	6.35173	987	1506.07	0.0602738	192	262.091	793	1220.36	0.00159163	NA	NA	1086	1904.86	NA	0.164955	0.00277519	0.114513
Bcin01g03740.1	1	0.428888	1085	1840.8	0.569865	2	15.7376	985	1474.84	0.00078219	12	44.7002	781	1161.16	2.94508e-05	96	345.228	989	1495.58	1.93332e-29	2	5.00249	987	1490.57	0.109736	192	268.973	793	1205.86	0.000660146	NA	NA	1086	1841.23	NA	0.157533	0.00228272	0.122737
Bcin01g03750.1	1	21.1602	1085	1730	1.04278e-05	2	23.8124	985	1444.46	1.78595e-05	12	46.7122	781	1115.84	1.39474e-05	96	259.466	989	1470.53	9.24354e-17	2	2.25713	987	1468.27	0.372808	192	281.904	793	1162.56	0.000112742	NA	NA	1086	1751.16	NA	0.128903	0.00112135	0.14005
Bcin01g03760.1	1	7.43591	1085	868.663	0.0105355	2	17.2266	985	645.201	0.000393062	12	15.0769	781	470.012	0.271234	96	199.011	989	669.652	4.6056e-09	2	7.2246	987	662.427	0.0405982	192	160.112	793	485.089	1	NA	NA	1086	876.099	NA	0.183872	0.00667502	0.147932
Bcin01g03770.1	1	28.1701	1085	1652.83	3.18174e-07	2	45.8016	985	866.767	5.22113e-10	12	36.2321	781	682.506	0.000600817	96	731.888	989	920.94	2.49343e-97	2	8.37215	987	912.568	0.0243566	192	148.029	793	718.738	1	NA	NA	1086	1681	NA	0.302276	0.00345777	0.0611371
Bcin01g03780.1	1	73.7191	1085	1947.15	5.27209e-17	2	17.7288	985	1474.55	0.000310561	12	55.0762	781	1161.89	5.7455e-07	96	402.997	989	1544.15	1.04422e-38	2	51.8657	987	1492.28	4.04203e-11	192	257.584	793	1216.97	0.00274529	NA	NA	1086	2020.87	NA	0.162779	0.0209497	0.104044
Bcin01g03790.1	1	14.0764	1085	2176.7	0.000365233	2	70.0205	985	1579.82	4.80427e-15	12	93.5604	781	1204.16	8.38118e-14	96	368.179	989	1808.52	4.60044e-33	2	158.677	987	1649.84	3.21472e-33	192	282.102	793	1297.72	0.000109599	NA	NA	1086	2190.77	NA	0.135478	0.058388	0.103804
Bcin01g03810.1	1	17.218	1085	1526.52	7.48441e-05	2	6.09559	985	1321.17	0.0655147	12	35.291	781	1031.13	0.00082964	96	187.483	989	1339.04	9.0357e-08	2	11.7709	987	1327.27	0.00525885	192	254.754	793	1066.42	0.0038596	NA	NA	1086	1543.74	NA	0.107564	0.0067533	0.146159
Bcin01g03820.1	1	1.71336	1085	2296.04	0.238227	2	53.2961	985	1535.59	1.46199e-11	12	134.016	781	1140.22	2.13774e-21	96	647.386	989	1648.66	1.34961e-81	2	59.7695	987	1588.89	1.0092e-12	192	261.351	793	1274.24	0.00174188	NA	NA	1086	2297.75	NA	0.215443	0.0198906	0.0869746
Bcin01g03830.1	1	70.3551	1085	1838.95	2.78048e-16	2	6.64821	985	1471.19	0.0510566	12	43.8869	781	1159.37	3.96916e-05	96	358.815	989	1480.14	1.4106e-31	2	2.29585	987	1477.84	0.366526	192	267.941	793	1203.25	0.000754534	NA	NA	1086	1909.31	NA	0.158039	0.0010112	0.118014
Bcin01g03840.1	1	2.90503	1085	1910.2	0.119193	2	34.7087	985	1487.97	1.03601e-07	12	48.5829	781	1183.81	6.89676e-06	96	358.693	989	1551.51	1.47436e-31	2	28.8278	987	1522.68	2.03976e-06	192	255.575	793	1232.39	0.00350065	NA	NA	1086	1913.1	NA	0.155911	0.0125304	0.111089
Bcin01g03860.1	1	15.1732	1085	1786.89	0.000209865	2	3.71243	985	1440.65	0.190856	12	32.3429	781	1169.33	0.00222607	96	294.796	989	1492.09	8.63693e-22	2	47.7306	987	1444.36	2.86238e-10	192	238.979	793	1201.67	0.0216676	NA	NA	1086	1802.06	NA	0.13746	0.0222563	0.111434
Bcin01g03890.1	1	26.9521	1085	5108.43	5.81646e-07	2	29.5605	985	1084.41	1.19605e-06	12	55.5507	781	772.517	4.75944e-07	96	3977.91	989	1130.52	0	2	16.5548	987	1113.97	0.00059482	192	256.34	793	828.068	0.00319561	NA	NA	1086	5135.38	NA	0.435704	0.00181327	0.0280771	hypothetical protein IQ06DRAFT_293598	no GO terms
Bcin01g03900.1	1	144.577	1085	1702.25	3.73229e-32	2	25.6878	985	478.116	7.43106e-06	12	33.2636	781	350.928	0.00164002	96	1191.64	989	510.606	1.22723e-186	2	6.80226	987	503.804	0.0491249	192	93.9243	793	384.192	1	NA	NA	1086	1846.83	NA	0.391309	0.00223371	0.0308427
Bcin01g03910.1	1	116.342	1085	1636.7	4.03637e-26	2	56.448	985	453.985	3.23518e-12	12	37.0673	781	312.53	0.000451169	96	1117.31	989	519.392	6.59663e-172	2	8.95921	987	510.433	0.0187163	192	104.388	793	349.597	1	NA	NA	1086	1753.04	NA	0.388047	0.00311159	0.0362546
Bcin01g03910.2	1	131.469	1085	1332.24	2.37839e-29	2	18.6288	985	358.189	0.000203978	12	29.1653	781	261.373	0.00616062	96	951.885	989	380.359	1.89495e-139	2	3.54106	987	376.818	0.210485	192	67.6506	793	290.538	1	NA	NA	1086	1463.71	NA	0.393481	0.00146377	0.0279647
Bcin01g03930.1	1	83.4755	1085	1254.37	4.34622e-19	2	9.21189	985	1017.47	0.0159697	12	23.9029	781	773.813	0.0302049	96	220.003	989	1034.37	1.4098e-11	2	7.6853	987	1026.68	0.0331421	192	219.755	793	797.716	0.120886	NA	NA	1086	1337.85	NA	0.140529	0.00490905	0.140371
Bcin01g03940.1	1	30.348	1085	1196.65	1.08767e-07	2	20.131	985	993.278	0.000101015	12	30.1505	781	756.053	0.00450909	96	175.593	989	1021.06	1.62903e-06	2	7.6493	987	1013.41	0.0336768	192	207.075	793	786.204	0.285483	NA	NA	1086	1227	NA	0.124513	0.0054241	0.146836
Bcin01g03950.1	1	11.1269	1085	2263.23	0.00161573	2	6.36024	985	1549.98	0.0581183	12	92.3863	781	1180.89	1.36644e-13	96	682.879	989	1580.35	3.65815e-88	2	24.0126	987	1556.34	1.90855e-05	192	276.702	793	1273.27	0.000235747	NA	NA	1086	2274.35	NA	0.229058	0.00805456	0.0928142
Bcin01g03970.1	1	77.9298	1085	2021.56	6.64821e-18	2	4.20154	985	1187.42	0.153536	12	25.4244	781	930.818	0.019422	96	825.082	989	1196.48	5.49259e-115	2	4.85608	987	1191.62	0.117192	192	231.18	793	956.243	0.0462092	NA	NA	1086	2099.49	NA	0.281653	0.00165769	0.0789164
Bcin01g04010.1	1	96.5273	1085	1779.45	6.949e-22	2	4.28497	985	1477.89	0.147902	12	11.6358	781	1193.36	0.505519	96	264.905	989	1514.55	1.63365e-17	2	32.3702	987	1482.18	3.89522e-07	192	272.895	793	1205	0.00039403	NA	NA	1086	1875.98	NA	0.121893	0.0148948	0.12557
Bcin01g04020.1	1	18.715	1085	1765.01	3.5421e-05	2	23.3394	985	1457.9	2.22754e-05	12	71.212	781	1157.12	8.9946e-10	96	261.153	989	1503.86	5.41992e-17	2	22.6164	987	1481.24	3.64807e-05	192	229.571	793	1228.33	0.0534321	NA	NA	1086	1783.73	NA	0.126314	0.0109391	0.111038
Bcin01g04030.1	1	5.40309	1085	1907.16	0.0306284	2	20.2998	985	1504.92	9.32674e-05	12	55.2566	781	1217.52	5.35753e-07	96	265.818	989	1641.34	1.21941e-17	2	116.117	987	1525.22	2.27584e-24	192	232.143	793	1272.78	0.0423147	NA	NA	1086	1912.56	NA	0.11585	0.0506066	0.101174
Bcin01g04040.1	1	8.59146	1085	1850.75	0.00580963	2	6.975	985	1545.97	0.044101	12	37.8535	781	1202.65	0.00034292	96	268.12	989	1582.63	5.82174e-18	2	29.6907	987	1552.94	1.36139e-06	192	305.463	793	1240.5	3.2154e-06	NA	NA	1086	1859.34	NA	0.124294	0.0137638	0.141605
Bcin01g04050.1	1	7.29964	1085	1772.78	0.0113107	2	11.188	985	1524.17	0.00644344	12	26.3299	781	1228.45	0.0148425	96	229.574	989	1543.21	8.76751e-13	2	7.84844	987	1535.36	0.0307974	192	269.389	793	1254.78	0.000624995	NA	NA	1086	1780.08	NA	0.113791	0.00389018	0.133526
Bcin01g04060.1	1	117.836	1085	2575.17	1.92995e-26	2	47.876	985	1504.43	1.93399e-10	12	50.0051	781	1064.33	4.0261e-06	96	907.565	989	1667.61	7.48085e-131	2	115.307	987	1552.3	3.37097e-24	192	390.09	793	1114.34	1.5379e-13	NA	NA	1086	2693.01	NA	0.244239	0.0310308	0.104979
Bcin01g04070.1	1	14.1828	1085	1714.92	0.000346378	2	38.4917	985	1439.53	1.69988e-08	12	44.6232	781	1175.38	3.0291e-05	96	218.368	989	1496.55	2.24672e-11	2	18.5291	987	1478.02	0.000241997	192	219.526	793	1220	0.123039	NA	NA	1086	1729.1	NA	0.111073	0.00942477	0.111661
Bcin01g04080.1	1	155.866	1085	1976.37	1.42515e-34	2	26.8902	985	1585.82	4.19938e-06	12	46.0941	781	1301.14	1.75345e-05	96	331.559	989	1644.81	2.55323e-27	2	32.1056	987	1612.71	4.40662e-07	192	238.578	793	1347.24	0.0225437	NA	NA	1086	2132.24	NA	0.132841	0.0128633	0.0955879
Bcin01g04090.1	1	2.56711	1085	1831.92	0.14409	2	14.1249	985	1531.5	0.00165554	12	37.8165	781	1204.96	0.000347399	96	277.821	989	1554.1	2.47112e-19	2	8.47994	987	1545.62	0.0232028	192	288.716	793	1242.78	4.19196e-05	NA	NA	1086	1834.49	NA	0.130999	0.00399848	0.136136
Bcin01g04100.1	1	11.1033	1085	1752.11	0.00163538	2	31.0597	985	1473.38	5.89326e-07	12	11.5222	781	1209.33	0.514327	96	233.973	989	1518.14	2.38206e-13	2	13.6991	987	1504.44	0.00217561	192	252.532	793	1220.85	0.00500587	NA	NA	1086	1763.22	NA	0.116353	0.00681248	0.125583
Bcin01g04110.1	1	5.65857	1085	1267.28	0.0267528	2	1.50188	985	710.574	0.515002	12	21.4794	781	473.669	0.059009	96	545.894	989	721.383	3.24359e-63	2	9.30763	987	712.076	0.0159893	192	215.425	793	495.148	0.166391	NA	NA	1086	1272.94	NA	0.298607	0.00509132	0.117839
Bcin01g04120.1	1	0.244738	1085	984.659	0.671899	2	2.46726	985	880.34	0.335086	12	8.95507	781	675.47	0.725438	96	100.389	989	884.27	0.363883	2	1.46284	987	882.807	0.526539	192	195.914	793	684.425	0.503591	NA	NA	1086	984.904	NA	0.0923752	0.00134606	0.180274
Bcin01g04130.1	1	8.72886	1085	2241.27	0.00542411	2	60.2845	985	1632.93	5.07804e-13	12	90.85	781	1243.26	2.6102e-13	96	546.009	989	1695.26	3.09437e-63	2	2.04531	987	1693.22	0.408328	192	298.818	793	1334.11	9.18095e-06	NA	NA	1086	2250	NA	0.195139	0.000730974	0.106795
Bcin01g04140.1	1	18.4085	1085	2554.26	4.1231e-05	2	113.792	985	1614.48	3.45741e-24	12	67.5783	781	1168.8	3.931e-09	96	818.065	989	1736.2	1.17939e-113	2	7.91902	987	1728.28	0.0298246	192	378.11	793	1236.37	2.5206e-12	NA	NA	1086	2572.67	NA	0.240703	0.00233005	0.111253
Bcin01g04150.1	1	10.6868	1085	881.783	0.00201761	2	8.47538	985	659.594	0.0223841	12	16.3088	781	472.963	0.208329	96	199.925	989	681.858	3.61445e-09	2	13.7889	987	668.069	0.00208792	192	170.322	793	489.272	0.959576	NA	NA	1086	892.469	NA	0.180734	0.0124653	0.153973
Bcin01g04160.1	1	25.464	1085	1535.96	1.21855e-06	2	8.96578	985	1356.24	0.0178976	12	17.1717	781	1124.83	0.172296	96	152.401	989	1383.56	0.000251386	2	18.3504	987	1365.21	0.00026245	192	214.243	793	1142	0.180852	NA	NA	1086	1561.42	NA	0.0879825	0.0105938	0.123685
Bcin01g04170.1	1	71.6211	1085	1742.44	1.48607e-16	2	1.74607	985	1415.53	0.462519	12	22.297	781	1141.54	0.0472009	96	303.221	989	1439.22	4.92982e-23	2	21.9445	987	1417.28	4.97579e-05	192	251.693	793	1163.84	0.00550039	NA	NA	1086	1814.06	NA	0.141743	0.0102581	0.117656
Bcin01g04180.1	1	27.0716	1085	1530.41	5.48258e-07	2	34.692	985	1313.61	1.04431e-07	12	31.0794	781	1056.04	0.00335032	96	175.091	989	1355.32	1.83208e-06	2	7.01467	987	1348.3	0.0446286	192	226.49	793	1087.12	0.0699658	NA	NA	1086	1557.48	NA	0.100651	0.00403238	0.130198
Bcin01g04220.1	1	5.36862	1085	1298.85	0.0311884	2	36.9295	985	1059.47	3.5851e-08	12	52.1057	781	789.398	1.8051e-06	96	193.646	989	1105.21	1.87336e-08	2	8.81177	987	1096.39	0.0200414	192	217.961	793	841.504	0.138487	NA	NA	1086	1304.22	NA	0.128525	0.00584847	0.144663
Bcin01g04230.1	1	0.0796148	1085	1937.04	0.811836	2	70.6704	985	1463.72	3.51505e-15	12	58.9627	781	1145.15	1.24205e-07	96	366.222	989	1570.82	9.42236e-33	2	36.4272	987	1534.39	5.86916e-08	192	259.61	793	1204.11	0.0021517	NA	NA	1086	1937.12	NA	0.156521	0.0155687	0.110955
Bcin01g04240.1	1	145.467	1085	2683.73	2.41006e-32	2	293.436	985	1773.68	1.1087e-61	12	246.71	781	1210.97	2.20078e-43	96	558.744	989	2124.98	1.66889e-65	2	57.8719	987	2067.11	2.44436e-12	192	315.995	793	1457.68	5.66593e-07	NA	NA	1086	2829.2	NA	0.162152	0.0167949	0.091704
Bcin01g04250.1	1	4.10723	1085	1725.31	0.0612435	2	57.5367	985	1428.4	1.92074e-12	12	52.0389	781	1083.46	1.85317e-06	96	222.891	989	1502.42	6.16148e-12	2	16.4862	987	1485.93	0.000612723	192	292.896	793	1135.5	2.26225e-05	NA	NA	1086	1729.42	NA	0.113212	0.00837375	0.148769
Bcin01g04260.1	1	25.3809	1085	1843.97	1.26922e-06	2	10.2767	985	1480.21	0.00978513	12	45.6037	781	1221.02	2.10521e-05	96	353.166	989	1490.8	1.09852e-30	2	0.313367	987	1490.49	0.871879	192	213.587	793	1266.63	0.189222	NA	NA	1086	1869.35	NA	0.158881	0.000140977	0.0960881
Bcin01g04270.1	1	127.644	1085	2215.95	1.54286e-28	2	95.2	985	1416.25	2.59042e-20	12	45.4871	781	1086.33	2.19847e-05	96	649.605	989	1566.34	5.25051e-82	2	54.8905	987	1511.45	9.84973e-12	192	284.436	793	1131.82	7.81159e-05	NA	NA	1086	2343.59	NA	0.213119	0.0180082	0.0933164
Bcin01g04280.1	1	75.7524	1085	2083.93	1.93352e-17	2	91.3458	985	1581.31	1.66171e-19	12	63.7185	781	1262.04	1.86226e-08	96	396.989	989	1686.95	1.00861e-37	2	14.2871	987	1672.66	0.0016683	192	255.557	793	1325.76	0.00350572	NA	NA	1086	2159.69	NA	0.154413	0.0055571	0.0994013
Bcin01g04280.2	1	79.264	1085	2053.99	3.44377e-18	2	48.0935	985	1585.99	1.74112e-10	12	62.956	781	1258.2	2.54326e-08	96	402.419	989	1651.57	1.29976e-38	2	17.4873	987	1634.08	0.000389309	192	264.829	793	1321.16	0.00113324	NA	NA	1086	2133.25	NA	0.157616	0.00684928	0.103726
Bcin01g04290.1	1	2.67067	1085	958.23	0.135971	2	11.1857	985	700.865	0.00644986	12	10.5719	781	561.709	0.59233	96	237.802	989	720.428	7.55083e-14	2	8.37723	987	712.05	0.0243158	192	128.584	793	572.281	1	NA	NA	1086	960.901	NA	0.197006	0.00694008	0.106525
Bcin01g04300.1	1	33.7844	1085	1586.74	1.98408e-08	2	1.82517	985	1352.92	0.446607	12	22.9981	781	1127.59	0.0389471	96	215.615	989	1371.13	4.89262e-11	2	16.3825	987	1354.74	0.000642111	192	202.328	793	1150.59	0.371209	NA	NA	1086	1620.52	NA	0.11639	0.00884335	0.109217
Bcin01g04310.1	1	29.8454	1085	2231	1.39184e-07	2	38.556	985	1563.38	1.64956e-08	12	87.8546	781	1228.64	9.29924e-13	96	609.455	989	1621.54	1.17706e-74	2	19.6034	987	1601.94	0.000147595	192	246.886	793	1316.49	0.00948026	NA	NA	1086	2260.84	NA	0.210891	0.00678344	0.0854307
Bcin01g04340.1	1	110.131	1085	1958.65	8.52421e-25	2	30.7022	985	1451.3	6.9751e-07	12	23.9843	781	1146.6	0.0294912	96	404.095	989	1554.56	6.89213e-39	2	72.5495	987	1482.01	2.32067e-15	192	280.721	793	1170.58	0.00013294	NA	NA	1086	2068.78	NA	0.158753	0.0285019	0.110284
Bcin01g04350.1	1	104.299	1085	1767.34	1.48991e-23	2	24.3797	985	1478.25	1.36789e-05	12	17.4805	781	1156.89	0.16072	96	218.189	989	1549.15	2.36321e-11	2	46.5159	987	1502.63	5.09069e-10	192	303.887	793	1174.37	4.12861e-06	NA	NA	1086	1871.64	NA	0.102132	0.0217736	0.142246
Bcin01g04360.1	1	35.8357	1085	1939.48	7.17459e-09	2	1.04705	985	1579.7	0.628655	12	40.4766	781	1260.71	0.000136037	96	358.592	989	1580.89	1.52992e-31	2	0.142887	987	1580.74	0.940163	192	278.514	793	1301.18	0.000182543	NA	NA	1086	1975.31	NA	0.153635	6.12185e-05	0.119327
Bcin01g04370.1	1	2.07608	1085	2011.77	0.191575	2	69.5504	985	1475.8	6.00763e-15	12	60.445	781	1190.21	6.90127e-08	96	431.531	989	1580.24	1.938e-43	2	34.8884	987	1545.35	1.19893e-07	192	225.15	793	1250.65	0.0783076	NA	NA	1086	2013.85	NA	0.173986	0.0140664	0.0907765
Bcin01g04380.1	1	67.7592	1085	2199.3	9.93683e-16	2	64.1494	985	1627.62	7.92389e-14	12	131.507	781	1233.66	6.45838e-21	96	498.756	989	1700.55	6.33175e-55	2	8.77498	987	1691.77	0.020381	192	262.451	793	1365.17	0.00152624	NA	NA	1086	2267.06	NA	0.179758	0.00316262	0.0945908
Bcin01g04390.1	1	8.6346	1085	1956.48	0.00568655	2	31.0482	985	1556.48	5.92287e-07	12	63.025	781	1241.07	2.47216e-08	96	366.996	989	1589.48	7.09561e-33	2	1.95391	987	1587.53	0.425029	192	252.385	793	1304.09	0.0050894	NA	NA	1086	1965.11	NA	0.157235	0.000837128	0.108131
Bcin01g04420.1	1	61.8014	1085	2750.43	1.87811e-14	2	79.7401	985	1184.86	4.51858e-17	12	72.1508	781	869.841	6.12201e-10	96	1477.46	989	1272.97	4.95467e-244	2	8.37689	987	1264.6	0.0243158	192	242.864	793	941.992	0.0144728	NA	NA	1086	2812.24	NA	0.34375	0.00194899	0.0565054	hypothetical protein BC1G_13891	F:catalytic activity; P:metabolic process
Bcin01g04430.1	1	4.10143	1085	925.056	0.0614349	2	15.6071	985	547.009	0.000830692	12	59.7827	781	346.202	8.96089e-08	96	353.957	989	571.099	8.24659e-31	2	8.48314	987	562.616	0.0231697	192	141.025	793	405.984	1	NA	NA	1086	929.158	NA	0.274046	0.00656794	0.109186
Bcin01g04440.1	1	1.20742	1085	1918.23	0.327129	2	1.81241	985	1555.51	0.449305	12	22.8603	781	1256.88	0.0404454	96	356.167	989	1562.06	3.70577e-31	2	4.73231	987	1557.33	0.123893	192	275.776	793	1279.74	0.000266326	NA	NA	1086	1919.43	NA	0.156191	0.00207527	0.120937
Bcin01g04450.1	1	0.242742	1085	813.99	0.673186	2	1.37612	985	711.342	0.543847	12	16.7766	781	547.864	0.188125	96	98.3159	989	715.674	0.419397	2	2.95563	987	712.718	0.273504	192	146.701	793	564.641	1	NA	NA	1086	814.232	NA	0.10739	0.00322842	0.160241
Bcin01g04450.2	1	0.186914	1085	791.194	0.712463	2	6.27831	985	720.119	0.0602604	12	22.9703	781	546.259	0.0392269	96	61.8508	989	729.343	0.997458	2	2.94567	987	726.397	0.274763	192	150.89	793	569.229	1	NA	NA	1086	791.381	NA	0.0722406	0.00344049	0.176236
Bcin01g04460.1	1	14.4007	1085	1551.45	0.000310471	2	1.46188	985	1359.96	0.523462	12	40.1331	781	1060.23	0.000153813	96	185.074	989	1366.37	1.64646e-07	2	4.94995	987	1361.42	0.112396	192	259.6	793	1100.36	0.00215395	NA	NA	1086	1565.85	NA	0.105403	0.00281908	0.147847
Bcin01g04470.1	1	20.2683	1085	1988.88	1.6226e-05	2	3.72039	985	1589.8	0.190254	12	85.3882	781	1264.88	2.62601e-12	96	386.997	989	1601.88	4.26563e-36	2	8.36108	987	1593.52	0.024458	192	239.528	793	1350.27	0.0205088	NA	NA	1086	2009.15	NA	0.160947	0.00347726	0.0996165
Bcin01g04480.1	1	0.240442	1085	2294.32	0.674606	2	27.8233	985	1563.95	2.7125e-06	12	138.744	781	1196.94	2.63004e-22	96	639.657	989	1654.66	3.56466e-80	2	62.889	987	1591.78	2.28181e-13	192	228.271	793	1335.68	0.0599834	NA	NA	1086	2294.56	NA	0.213425	0.0209832	0.0761638
Bcin01g04490.1	1	7.48613	1085	1633.81	0.0102602	2	17.0277	985	1396.37	0.000430153	12	34.1394	781	1118.67	0.00122669	96	197.887	989	1435.92	6.19374e-09	2	22.5218	987	1413.4	3.80422e-05	192	243.567	793	1152.81	0.0134881	NA	NA	1086	1641.3	NA	0.106294	0.0120974	0.13083
Bcin01g04490.2	1	1.00041	1085	1580.91	0.375684	2	14.2938	985	1369.9	0.00152916	12	39.9447	781	1120.96	0.000164186	96	185.323	989	1395.58	1.5479e-07	2	11.3917	987	1384.19	0.0062574	192	208.99	793	1160.91	0.254729	NA	NA	1086	1581.91	NA	0.104195	0.00640479	0.117501
Bcin01g04500.1	1	0.073883	1085	1056.16	0.818563	2	0.628486	985	877.001	0.757217	12	7.60856	781	680.291	0.825956	96	177.79	989	878.368	9.68834e-07	2	0.738952	987	877.629	0.725397	192	189.101	793	687.9	0.649331	NA	NA	1086	1056.23	NA	0.143987	0.000598458	0.153148
Bcin01g04510.1	1	6.19128	1085	1735.86	0.0202084	2	6.9332	985	1485.54	0.0448792	12	27.4528	781	1207.09	0.0105391	96	228.406	989	1507.45	1.23581e-12	2	14.9804	987	1492.47	0.00121922	192	250.996	793	1234.54	0.00595367	NA	NA	1086	1742.05	NA	0.115041	0.00754515	0.126418
Bcin01g04530.1	1	1.8879	1085	1163.97	0.214345	2	15.7647	985	689.448	0.000772317	12	38.9571	781	487.801	0.00023321	96	442.695	989	721.273	2.55617e-45	2	16.0598	987	705.213	0.000746524	192	162.69	793	526.758	1	NA	NA	1086	1165.86	NA	0.272493	0.00988533	0.100141
Bcin01g04540.1	1	46.0803	1085	4596.3	4.45384e-11	2	81.1047	985	1461.58	2.3501e-17	12	64.4673	781	1068.3	1.38515e-08	96	3003.19	989	1593.11	0	2	50.4253	987	1542.69	7.94487e-11	192	328.819	793	1132.77	6.07733e-08	NA	NA	1086	4642.38	NA	0.390227	0.00655214	0.0427259	G -coupled receptor : Microbial opsin [Botrytis cinerea T4]	F:ion channel activity; P:ion transport; P:ion transmembrane transport; C:membrane; C:integral component of membrane
Bcin01g04550.1	1	0.138785	1085	1992.83	0.752877	2	92.3487	985	1522.76	1.02913e-19	12	62.8062	781	1197.9	2.69724e-08	96	375.382	989	1617.45	3.22619e-34	2	2.34193	987	1615.1	0.359384	192	262.047	793	1260.71	0.00160005	NA	NA	1086	1992.97	NA	0.158343	0.000987869	0.110536
Bcin01g04560.1	1	94.3972	1085	2446.66	1.98731e-21	2	100.366	985	1666.85	2.1711e-21	12	180.991	781	1170.24	1.93741e-30	96	652.068	989	1794.59	1.84571e-82	2	27.3726	987	1767.22	4.00635e-06	192	315.623	793	1351.23	6.00842e-07	NA	NA	1086	2541.06	NA	0.202474	0.00849948	0.0980043
Bcin01g04570.1	1	59.3186	1085	2518.17	6.36823e-14	2	102.704	985	1638.37	7.07269e-22	12	138.05	781	1170.94	3.58319e-22	96	774.408	989	1743.76	2.37297e-105	2	2.68262	987	1741.08	0.308722	192	329.386	793	1308.99	5.47786e-08	NA	NA	1086	2577.48	NA	0.230851	0.00079969	0.09819
Bcin01g04580.1	1	45.2437	1085	2731.84	6.744e-11	2	65.9283	985	1571.76	3.40143e-14	12	106.959	781	1170.8	2.80716e-16	96	1061.56	989	1670.28	6.56691e-161	2	32.5941	987	1637.68	3.50465e-07	192	294.002	793	1277.75	1.91478e-05	NA	NA	1086	2777.08	NA	0.274217	0.00841956	0.0759453
Bcin01g04580.2	1	49.8949	1085	2692.92	6.73477e-12	2	57.8987	985	1573.61	1.61316e-12	12	82.5431	781	1174.68	8.50589e-12	96	1006.79	989	1686.13	3.59292e-150	2	54.6184	987	1631.51	1.11964e-11	192	316.389	793	1257.22	5.34928e-07	NA	NA	1086	2742.82	NA	0.264651	0.0143573	0.0831679
Bcin01g04600.1	1	42.4851	1085	2481.73	2.65557e-10	2	30.2345	985	1561.25	8.70951e-07	12	169.314	781	1160.43	3.45824e-28	96	809.367	989	1672.36	5.42219e-112	2	80.8847	987	1591.48	4.59103e-17	192	231.502	793	1329.74	0.0448828	NA	NA	1086	2524.22	NA	0.23704	0.0236888	0.0678003
Bcin01g04630.1	1	8.11029	1085	1931.31	0.00744863	2	2.73025	985	1532.79	0.297634	12	50.3613	781	1194.69	3.51508e-06	96	393.905	989	1537.41	3.212e-37	2	1.89111	987	1535.52	0.436569	192	287.739	793	1245.05	4.83444e-05	NA	NA	1086	1939.42	NA	0.16868	0.000809821	0.123217
Bcin01g04640.1	1	1.2364	1085	2002.94	0.320878	2	9.50466	985	1448.61	0.0139722	12	59.189	781	1198.33	1.13768e-07	96	540.95	989	1461.99	2.44737e-62	2	3.87272	987	1458.12	0.181266	192	191.092	793	1257.52	0.607696	NA	NA	1086	2004.18	NA	0.21222	0.00151931	0.0749675
Bcin01g04660.1	1	11.5294	1085	1250.44	0.00131864	2	28.2206	985	982.219	2.24762e-06	12	18.4889	781	751.194	0.126567	96	233.629	989	1016.81	2.63887e-13	2	6.36889	987	1010.44	0.0597867	192	212.536	793	769.683	0.203212	NA	NA	1086	1261.97	NA	0.155549	0.00424037	0.141505
Bcin01g04670.1	1	64.4573	1085	2330.19	5.05432e-15	2	37.2056	985	1714.05	3.13673e-08	12	91.7879	781	1252.39	1.75954e-13	96	435.747	989	1894.45	3.81281e-44	2	143.19	987	1751.26	5.62998e-30	192	369.875	793	1344.18	1.60209e-11	NA	NA	1086	2394.65	NA	0.146539	0.048154	0.124387
Bcin01g04700.1	1	20.6115	1085	1642.8	1.36831e-05	2	13.5283	985	1343.54	0.00218594	12	29.7228	781	1106.1	0.00515996	96	260.917	989	1381.89	5.83602e-17	2	24.8136	987	1357.07	1.32002e-05	192	207.725	793	1135.82	0.274642	NA	NA	1086	1663.42	NA	0.133862	0.0127305	0.106573
Bcin01g04710.1	1	0.133337	1085	1820.99	0.75742	2	14.0669	985	1535.39	0.00170038	12	57.3798	781	1200.06	2.33111e-07	96	265.372	989	1555.62	1.40686e-17	2	6.16506	987	1549.45	0.0654579	192	277.953	793	1257.44	0.000197616	NA	NA	1086	1821.13	NA	0.126811	0.00294604	0.132822
Bcin01g04720.1	1	34.0099	1085	1825.19	1.77745e-08	2	15.8212	985	1488.7	0.000752796	12	55.6067	781	1152.01	4.65548e-07	96	302.909	989	1522.28	5.48216e-23	2	17.7653	987	1504.52	0.000343487	192	281.081	793	1207.62	0.00012648	NA	NA	1086	1859.2	NA	0.138957	0.00814966	0.128943
Bcin01g04730.1	1	8.14151	1085	788.884	0.00733361	2	9.96817	985	681.859	0.0112733	12	12.3174	781	535.721	0.452723	96	95.3411	989	693.543	0.503106	2	1.71594	987	691.827	0.471281	192	133.821	793	548.038	1	NA	NA	1086	797.025	NA	0.106636	0.00191922	0.149674
Bcin01g04740.1	1	4.12772	1085	1297.58	0.0605902	2	17.553	985	1155.82	0.000337346	12	19.0585	781	905.749	0.110081	96	118.247	989	1179.34	0.0641655	2	5.96071	987	1173.38	0.0716619	192	231.016	793	924.807	0.0468841	NA	NA	1086	1301.71	NA	0.0829267	0.00418026	0.162012
Bcin01g04750.1	1	0.475033	1085	954.038	0.548655	2	0.580221	985	790.671	0.773423	12	37.6365	781	585.703	0.000369705	96	156.576	989	797.462	0.000108381	2	6.2112	987	791.251	0.0641626	192	167.331	793	623.34	0.983839	NA	NA	1086	954.513	NA	0.140138	0.00555911	0.149764
Bcin01g04770.1	1	6.83617	1085	914.995	0.0144083	2	6.6297	985	712.912	0.051492	12	17.8579	781	519.151	0.147418	96	194.956	989	720.039	1.33354e-08	2	0.497686	987	719.541	0.805022	192	175.902	793	537.009	0.890717	NA	NA	1086	921.831	NA	0.174491	0.000445442	0.157437
Bcin01g04780.1	1	29.0935	1085	2071.99	2.01158e-07	2	1.48621	985	1583.51	0.518468	12	102.301	781	1186.25	2.03897e-15	96	486.938	989	1585.05	7.08084e-53	2	0.048856	987	1585	0.979455	192	294.961	793	1288.55	1.65192e-05	NA	NA	1086	2101.08	NA	0.188147	1.88774e-05	0.11397
Bcin01g04790.1	1	6.87745	1085	1919.06	0.0141013	2	46.3795	985	1500.63	3.9541e-10	12	85.3794	781	1192.12	2.63429e-12	96	287.176	989	1631.89	1.11789e-20	2	84.8798	987	1547.01	6.97375e-18	192	223.133	793	1277.49	0.0926027	NA	NA	1086	1925.94	NA	0.124968	0.0369365	0.0970991
Bcin01g04800.1	1	0.886599	1085	1870.52	0.406932	2	15.1919	985	1575.63	0.00100646	12	47.1167	781	1247.27	1.19952e-05	96	245.234	989	1625.28	7.88342e-15	2	34.4646	987	1590.82	1.45708e-07	192	281.242	793	1294.38	0.000123554	NA	NA	1086	1871.4	NA	0.114004	0.0160218	0.130743
Bcin01g04810.1	1	74.6455	1085	1490.59	3.33521e-17	2	42.5786	985	1222.99	2.43245e-09	12	40.9867	781	976.376	0.00011327	96	223.463	989	1267.13	5.22315e-12	2	1.56514	987	1265.56	0.50337	192	205.623	793	1017.36	0.310316	NA	NA	1086	1565.24	NA	0.124821	0.000874249	0.114856
Bcin01g04820.1	1	3.58904	1085	1202.08	0.0814564	2	3.30792	985	1032	0.229361	12	12.0471	781	855.635	0.473531	96	164.652	989	1037.43	1.95171e-05	2	2.12595	987	1035.3	0.393779	192	164.314	793	867.682	1	NA	NA	1086	1205.67	NA	0.11997	0.00154902	0.119723
Bcin01g04860.1	1	23.8443	1085	1451.09	2.72388e-06	2	7.84388	985	955.928	0.0297729	12	58.7968	781	728.995	1.32621e-07	96	456.41	989	994.678	1.2253e-47	2	30.9055	987	963.772	7.7272e-07	192	168.136	793	787.792	0.978201	NA	NA	1086	1474.93	NA	0.232595	0.0157501	0.0856854
Bcin01g04880.1	1	51.7379	1085	1977.05	2.70859e-12	2	17.3474	985	1184.34	0.000371592	12	51.3587	781	870.208	2.40569e-06	96	770.48	989	1206.57	1.30441e-104	2	4.87862	987	1201.69	0.116028	192	262.775	793	921.567	0.00146496	NA	NA	1086	2028.79	NA	0.274765	0.00173979	0.0937095
Bcin01g04890.1	1	107.822	1085	2491.19	2.63684e-24	2	71.2384	985	1495.93	2.68214e-15	12	54.2436	781	1172.45	7.9223e-07	96	916.262	989	1574.93	1.55915e-132	2	7.76729	987	1567.17	0.0319332	192	269.234	793	1226.69	0.000637838	NA	NA	1086	2599.02	NA	0.260077	0.00220471	0.0764209
Bcin01g04900.1	1	205.44	1085	2703.99	3.57071e-45	2	18.4129	985	1419.48	0.000224795	12	26.3804	781	1123.04	0.0146082	96	1254.21	989	1449.77	4.05259e-199	2	11.8791	987	1437.89	0.0050066	192	270.062	793	1149.42	0.000570313	NA	NA	1086	2909.43	NA	0.300373	0.00284493	0.0646774
Bcin01g04920.1	1	0.431969	1085	828.077	0.568458	2	17.4774	985	647.475	0.000349514	12	18.6021	781	463.116	0.123214	96	152.515	989	675.561	0.000245775	2	10.6091	987	664.952	0.00891279	192	165.757	793	481.718	0.994892	NA	NA	1086	828.509	NA	0.153802	0.0106986	0.167155
Bcin01g04930.1	1	65.821	1085	2387.35	2.58277e-15	2	91.1805	985	1676.64	1.79606e-19	12	59.515	781	1265.16	9.97453e-08	96	607.915	989	1779.43	2.24343e-74	2	11.6068	987	1767.82	0.00567063	192	351.967	793	1324.68	7.04046e-10	NA	NA	1086	2453.17	NA	0.197845	0.0037774	0.114547
Bcin01g04940.1	1	0.0943276	1085	1963.71	0.794787	2	28.8443	985	1536.92	1.6754e-06	12	59.7343	781	1225.38	9.13043e-08	96	370.98	989	1592.73	1.64312e-33	2	26.9614	987	1565.77	4.85447e-06	192	251.808	793	1285.11	0.00543236	NA	NA	1086	1963.8	NA	0.157079	0.0114159	0.10662
Bcin01g04950.1	1	2.4532	1085	1838.7	0.153688	2	5.19711	985	1552.64	0.0976736	12	20.4533	781	1209.16	0.0771703	96	261.056	989	1577.65	5.58829e-17	2	19.8147	987	1557.83	0.000134346	192	323.027	793	1229.61	1.73046e-07	NA	NA	1086	1841.16	NA	0.123022	0.00933761	0.152226
Bcin01g04960.1	1	12.3282	1085	1888.23	0.000879997	2	27.3079	985	1464.9	3.45416e-06	12	28.2981	781	1181.38	0.00812219	96	328.531	989	1559.7	7.44891e-27	2	67.4897	987	1492.21	2.56714e-14	192	255.22	793	1209.68	0.0036477	NA	NA	1086	1900.56	NA	0.143052	0.0293871	0.11113
Bcin01g04980.1	1	48.9553	1085	2043.06	1.07002e-11	2	35.2209	985	1503.22	8.12911e-08	12	79.7642	781	1174.97	2.69316e-11	96	463.664	989	1579.39	7.12514e-49	2	40.9553	987	1538.44	6.9938e-09	192	248.481	793	1254.74	0.00794384	NA	NA	1086	2092.01	NA	0.178563	0.0157725	0.0956936
Bcin01g05010.1	1	57.0009	1085	1811.31	2.00307e-13	2	55.8889	985	1407.04	4.22547e-12	12	55.1601	781	1142.76	5.56575e-07	96	331.473	989	1479.84	2.63309e-27	2	16.9117	987	1462.93	0.000506092	192	209.119	793	1197.92	0.2528	NA	NA	1086	1868.31	NA	0.149535	0.00762924	0.0943382
Bcin01g05020.1	1	92.5551	1085	1951.02	4.91006e-21	2	67.307	985	1398.81	1.76202e-14	12	73.7875	781	1057.66	3.16462e-10	96	393.081	989	1557.94	4.37812e-37	2	91.8222	987	1466.11	2.52015e-19	192	267.362	793	1131.45	0.000813204	NA	NA	1086	2043.57	NA	0.155462	0.0363152	0.10574
Bcin01g05040.1	1	50.4997	1085	1758.51	4.99776e-12	2	13.4585	985	1402.72	0.00225669	12	46.6758	781	1132.21	1.41382e-05	96	325.718	989	1432.79	2.00753e-26	2	16.6088	987	1416.18	0.000581092	192	223.836	793	1178.89	0.0874373	NA	NA	1086	1809.01	NA	0.151403	0.00772025	0.104045
Bcin01g05060.1	1	75.4564	1085	1959.65	2.23038e-17	2	5.64089	985	1583.19	0.0801528	12	60.6004	781	1267.56	6.47791e-08	96	368.844	989	1590.8	3.61228e-33	2	1.97006	987	1588.83	0.422021	192	255.032	793	1328.16	0.00372737	NA	NA	1086	2035.1	NA	0.153307	0.00081884	0.106002
Bcin01g05060.2	1	84.5787	1085	1999.03	2.52231e-19	2	6.50699	985	1651.55	0.0544759	12	60.2098	781	1279.7	7.56994e-08	96	340.444	989	1658.59	1.07673e-28	2	0.533063	987	1658.06	0.792759	192	311.639	793	1339.91	1.18351e-06	NA	NA	1086	2083.61	NA	0.140413	0.000219857	0.128533
Bcin01g05070.1	1	2.12799	1085	1572.16	0.185925	2	7.92107	985	1421.84	0.0287903	12	21.8172	781	1177.06	0.0538164	96	142.222	989	1429.94	0.00170059	2	0.184316	987	1429.76	0.9236	192	222.961	793	1198.88	0.0939439	NA	NA	1086	1574.29	NA	0.0828461	0.000107367	0.129878
Bcin01g05110.1	1	113.455	1085	2092.03	1.67983e-25	2	66.6462	985	1523.34	2.41797e-14	12	105.843	781	1216.94	4.45606e-16	96	458.519	989	1633.51	5.36405e-48	2	43.5224	987	1589.98	2.07852e-09	192	200.558	793	1322.78	0.406571	NA	NA	1086	2205.48	NA	0.16935	0.0160746	0.0740743
Bcin01g05120.1	1	46.3338	1085	2268.57	3.92818e-11	2	11.6064	985	1590.13	0.00531864	12	161.709	781	1155.55	9.94026e-27	96	643.466	989	1625.11	7.12662e-81	2	23.3696	987	1601.74	2.56656e-05	192	272.872	793	1317.26	0.000395001	NA	NA	1086	2314.91	NA	0.215802	0.00783758	0.0915143
Bcin01g05130.1	1	82.8465	1085	1842.04	5.91865e-19	2	6.06538	985	1483.99	0.0663735	12	25.542	781	1174.26	0.0187414	96	230.076	989	1611.97	7.56585e-13	2	121.917	987	1490.05	1.44303e-25	192	284.18	793	1199.81	8.10547e-05	NA	NA	1086	1924.89	NA	0.101048	0.0535457	0.124811
Bcin01g05140.1	1	1.94867	1085	721.844	0.206533	2	0.615112	985	627.777	0.761743	12	5.16618	781	503.636	0.954768	96	91.8202	989	630.023	0.604072	2	1.63101	987	628.392	0.488684	192	118.975	793	508.802	1	NA	NA	1086	723.792	NA	0.112354	0.00199574	0.145581
Bcin01g05140.2	1	1.99646	1085	1549.09	0.200876	2	36.5112	985	1289.65	4.39589e-08	12	25.9015	781	986.884	0.0168742	96	222.577	989	1326.51	6.74672e-12	2	0.349101	987	1326.16	0.859233	192	276.865	793	1012.79	0.000230331	NA	NA	1086	1551.08	NA	0.125465	0.000196787	0.156067
Bcin01g05150.1	1	7.11677	1085	1475.11	0.0124602	2	10.7764	985	1278.18	0.00777973	12	8.13556	781	1059.3	0.788203	96	164.195	989	1310.91	2.15571e-05	2	21.9601	987	1288.95	4.94178e-05	192	210.744	793	1067.43	0.228593	NA	NA	1086	1482.22	NA	0.0984157	0.0131625	0.126317
Bcin01g05160.1	1	26.9019	1085	2215.3	5.95869e-07	2	29.7741	985	1472.06	1.08185e-06	12	55.989	781	1201.17	4.01262e-07	96	679.268	989	1536.03	1.7209e-87	2	34.1997	987	1501.83	1.64928e-07	192	214.898	793	1257.16	0.172655	NA	NA	1086	2242.2	NA	0.229819	0.0115709	0.072707
Bcin01g05170.1	1	35.4672	1085	2087.34	8.62197e-09	2	33.2864	985	1619.53	2.04365e-07	12	79.6788	781	1250.78	2.78894e-11	96	433.631	989	1653.71	8.62709e-44	2	0.897776	987	1652.81	0.67475	192	289.067	793	1330.46	3.98048e-05	NA	NA	1086	2122.81	NA	0.169564	0.000351059	0.113035
Bcin01g05180.1	1	0.595245	1085	1308.17	0.500999	2	8.72843	985	1119.63	0.0199183	12	38.1727	781	860.984	0.000306747	96	176.803	989	1131.37	1.22451e-06	2	3.00826	987	1128.36	0.26709	192	220.475	793	899.157	0.114327	NA	NA	1086	1308.77	NA	0.118773	0.0020209	0.148111
Bcin01g05190.1	1	36.8056	1085	1879.09	4.4384e-09	2	70.7339	985	1479.47	3.4167e-15	12	18.0428	781	1223.26	0.14108	96	317.459	989	1561.63	3.62323e-25	2	11.4215	987	1550.21	0.00617488	192	238.167	793	1241.31	0.0235233	NA	NA	1086	1915.89	NA	0.141422	0.00508802	0.106098
Bcin01g05200.1	1	1.46626	1085	1471.5	0.277387	2	3.38621	985	1269.36	0.22127	12	15.1235	781	1050.14	0.268602	96	196.017	989	1275.48	1.01178e-08	2	2.73529	987	1272.75	0.301373	192	204.098	793	1065.26	0.337661	NA	NA	1086	1472.96	NA	0.117255	0.00163621	0.122089
Bcin01g05210.1	1	79.5823	1085	1908.28	2.94738e-18	2	2.96127	985	1531.78	0.26772	12	72.192	781	1164.82	6.03259e-10	96	312.207	989	1596.07	2.24856e-24	2	61.3299	987	1534.74	4.80942e-13	192	294.766	793	1237.01	1.70604e-05	NA	NA	1086	1987.86	NA	0.132213	0.0259719	0.124827
Bcin01g05220.1	1	86.1366	1085	1929.37	1.16778e-19	2	30.9084	985	1615.74	6.32053e-07	12	85.7309	781	1231.11	2.27966e-12	96	277.133	989	1652.24	3.097e-19	2	5.58976	987	1646.65	0.0844306	192	298.902	793	1316.84	9.05967e-06	NA	NA	1086	2015.51	NA	0.120585	0.0024322	0.130057
Bcin01g05230.1	1	170.587	1085	1908.46	9.94761e-38	2	12.7372	985	1394.82	0.00316212	12	23.049	781	1150.07	0.0384028	96	332.836	989	1575.63	1.62385e-27	2	168.068	987	1407.56	3.40988e-35	192	221.698	793	1173.12	0.103983	NA	NA	1086	2079.05	NA	0.129008	0.0651438	0.0859311		C:membrane; C:integral component of membrane
Bcin01g05240.1	1	20.5105	1085	1870.83	1.43944e-05	2	35.2695	985	1477.65	7.94592e-08	12	29.6371	781	1172.04	0.00530326	96	289.168	989	1581.67	5.74168e-21	2	68.7441	987	1512.92	1.41343e-14	192	275.971	793	1201.68	0.000259484	NA	NA	1086	1891.34	NA	0.128561	0.0305631	0.122695
Bcin01g05250.1	1	229.741	1085	1878.04	2.22783e-50	2	49.9999	985	1528.31	7.02667e-11	12	26.4151	781	1173.76	0.0144671	96	294.755	989	1583.28	8.757e-22	2	4.97208	987	1578.31	0.111289	192	328.132	793	1200.18	6.89337e-08	NA	NA	1086	2107.78	NA	0.122432	0.00206525	0.136296
Bcin01g05260.1	1	136.475	1085	2050.02	2.02576e-30	2	13.3804	985	1496.04	0.00233852	12	66.1215	781	1211.73	7.09422e-09	96	535.898	989	1514.12	1.93348e-61	2	4.70315	987	1509.42	0.12541	192	218.184	793	1277.85	0.13632	NA	NA	1086	2186.49	NA	0.196509	0.0017246	0.080006
Bcin01g05270.1	1	15.3372	1085	1863.43	0.000193304	2	9.1609	985	1578.24	0.016368	12	19.4452	781	1265.81	0.0999012	96	263.017	989	1600.41	2.98759e-17	2	13.0137	987	1587.4	0.00296659	192	292.988	793	1285.25	2.22787e-05	NA	NA	1086	1878.77	NA	0.122061	0.00603939	0.13597
Bcin01g05280.1	1	0.799298	1085	797.07	0.432411	2	5.48349	985	685.749	0.0859065	12	16.0001	781	497.406	0.222814	96	99.178	989	697.892	0.396014	2	6.65872	987	691.233	0.0524059	192	172.343	793	513.407	0.938321	NA	NA	1086	797.869	NA	0.109746	0.00736825	0.190707
Bcin01g05290.1	1	0.00273585	1085	1333.79	0.9663	2	2.72668	985	1113.71	0.298091	12	27.5245	781	906.006	0.0103159	96	199.959	989	1133.83	3.58275e-09	2	17.3911	987	1116.44	0.000407209	192	180.183	793	933.531	0.824173	NA	NA	1086	1333.79	NA	0.128911	0.0112118	0.116162
Bcin01g05290.2	1	3.74135	1085	1313.44	0.0748607	2	8.28389	985	1160.27	0.0244434	12	16.6525	781	926.782	0.193388	96	127.716	989	1185.73	0.0180421	2	17.173	987	1168.55	0.000449992	192	216.836	793	943.434	0.150292	NA	NA	1086	1317.18	NA	0.0873525	0.0117457	0.148307
Bcin01g05300.1	1	1.01009e-06	1085	1067.2	0.999491	2	7.71636	985	891.679	0.0315187	12	17.8208	781	728.116	0.148615	96	166.032	989	901.166	1.44095e-05	2	1.77062	987	899.395	0.460115	192	145.742	793	745.937	1	NA	NA	1086	1067.2	NA	0.134439	0.0014337	0.11801
Bcin01g05310.1	1	185.332	1085	2054.36	7.16945e-41	2	41.1154	985	1456.7	4.88879e-09	12	106.132	781	1154.81	3.971e-16	96	542.482	989	1511.88	1.30479e-62	2	14.0649	987	1497.82	0.00184459	192	195.755	793	1260.95	0.506832	NA	NA	1086	2239.7	NA	0.194004	0.00502994	0.0700064
Bcin01g05330.1	1	43.56	1085	2265.34	1.55991e-10	2	64.8855	985	1509.89	5.56067e-14	12	74.1531	781	1184.46	2.72836e-10	96	683.462	989	1581.88	2.84948e-88	2	7.10132	987	1574.78	0.0429014	192	251.275	793	1258.61	0.00577147	NA	NA	1086	2308.9	NA	0.227861	0.00236753	0.0837733
Bcin01g05340.1	1	67.7614	1085	2055.05	9.93153e-16	2	60.0017	985	1650.38	5.80228e-13	12	89.6337	781	1250.44	4.36982e-13	96	341.985	989	1713.06	6.19231e-29	2	2.67491	987	1710.39	0.309718	192	310.312	793	1340.07	1.4516e-06	NA	NA	1086	2122.81	NA	0.138598	0.00108407	0.125761
Bcin01g05350.1	1	157.367	1085	2184.54	6.78898e-35	2	116.872	985	1586.75	7.75285e-25	12	148.798	781	1204.33	3.05518e-24	96	479.181	989	1705.36	1.54789e-51	2	1.73362	987	1703.62	0.467485	192	233.623	793	1353.13	0.0367435	NA	NA	1086	2341.91	NA	0.169753	0.000614143	0.0827621
Bcin01g05360.1	1	0.0109064	1085	1522.14	0.931244	2	9.64649	985	1309.79	0.0130711	12	25.1683	781	1095.91	0.0209675	96	179.115	989	1343.02	7.05838e-07	2	23.583	987	1319.44	2.32131e-05	192	188.716	793	1121.08	0.657017	NA	NA	1086	1522.15	NA	0.103844	0.0136725	0.10941
Bcin01g05370.1	1	9.69635	1085	1704.5	0.00333232	2	0.535838	985	1454.2	0.789372	12	39.0702	781	1195.68	0.000224523	96	215.941	989	1488.56	4.46175e-11	2	33.8174	987	1454.74	1.97235e-07	192	219.455	793	1234.75	0.123731	NA	NA	1086	1714.19	NA	0.109952	0.0172191	0.111741
Bcin01g05380.1	1	17.7927	1085	1787.92	5.61329e-05	2	3.91152	985	1501.41	0.175058	12	31.8478	781	1272.29	0.00262039	96	269.27	989	1518.65	4.01684e-18	2	13.3302	987	1505.32	0.00257198	192	197.279	793	1304.13	0.474387	NA	NA	1086	1805.72	NA	0.128941	0.00638322	0.0944677
Bcin01g05390.1	1	123.154	1085	1958.39	1.41083e-27	2	24.2784	985	1485.09	1.43437e-05	12	12.9152	781	1255.79	0.408933	96	417.429	989	1540.96	4.32483e-41	2	31.5894	987	1509.37	5.6241e-07	192	216.384	793	1268.71	0.155388	NA	NA	1086	2081.55	NA	0.164955	0.0124832	0.0855083
Bcin01g05400.1	1	0.0716916	1085	1796.4	0.821358	2	7.00691	985	1557.21	0.0434571	12	28.2546	781	1272.73	0.00822519	96	221.85	989	1574.55	8.31325e-12	2	10.3281	987	1564.22	0.0101145	192	256.227	793	1300.98	0.00323614	NA	NA	1086	1796.47	NA	0.109359	0.00509112	0.126305
Bcin01g05410.1	1	15.7996	1085	1808.56	0.000152999	2	55.8246	985	1480.82	4.35263e-12	12	39.9816	781	1215.33	0.000162123	96	250.492	989	1558.07	1.55212e-15	2	21.4176	987	1536.65	6.37199e-05	192	225.513	793	1255.31	0.0759746	NA	NA	1086	1824.36	NA	0.119494	0.010217	0.107579
Bcin01g05420.1	1	1.03752	1085	1481.74	0.366886	2	5.24118	985	1243.16	0.0957483	12	46.3398	781	1014.58	1.59771e-05	96	224.036	989	1257.71	4.42742e-12	2	9.30751	987	1248.4	0.0159893	192	182.234	793	1060.92	0.788456	NA	NA	1086	1482.78	NA	0.130548	0.00542357	0.106189
Bcin01g05430.1	1	97.7374	1085	1892.4	3.81013e-22	2	18.2061	985	1515.4	0.000247677	12	43.8978	781	1199.08	3.95765e-05	96	357.909	989	1534.5	1.96266e-31	2	0.88629	987	1533.61	0.678404	192	272.422	793	1242.98	0.000418443	NA	NA	1086	1990.14	NA	0.152371	0.000377316	0.115977
Bcin01g05440.1	1	0.220435	1085	1434.17	0.688228	2	7.48943	985	1269.36	0.0348831	12	13.2818	781	1049.24	0.382859	96	141.325	989	1292.84	0.00199321	2	15.9876	987	1276.85	0.000771321	192	206.844	793	1062.52	0.289093	NA	NA	1086	1434.39	NA	0.0887888	0.0100443	0.129952
Bcin01g05450.1	1	11.0488	1085	1799.49	0.00168079	2	8.26251	985	1522.41	0.0246856	12	17.8718	781	1243.55	0.146923	96	265.884	989	1533.6	1.19386e-17	2	2.93209	987	1530.67	0.276207	192	260.984	793	1261.42	0.00182212	NA	NA	1086	1810.54	NA	0.127869	0.0014101	0.125512
Bcin01g05460.1	1	0.0870675	1085	1544.28	0.802515	2	4.0865	985	1368.02	0.161622	12	26.9815	781	1088.11	0.012174	96	162.358	989	1381.92	3.21179e-05	2	9.81536	987	1372.11	0.0127306	192	252.928	793	1115.09	0.00478143	NA	NA	1086	1544.37	NA	0.0945843	0.00571811	0.147347
Bcin01g05480.1	1	16.3053	1085	1994.84	0.000118554	2	22.3068	985	1625.07	3.61621e-05	12	108.303	781	1193.49	1.58206e-16	96	340.951	989	1653.89	8.98481e-29	2	6.5166	987	1647.38	0.0559233	192	323.279	793	1301.79	1.65039e-07	NA	NA	1086	2011.15	NA	0.144555	0.00276289	0.137063
Bcin01g05490.1	1	6.49068	1085	1906.2	0.0172658	2	25.8548	985	1523.09	6.85869e-06	12	37.668	781	1218.45	0.000365666	96	316.16	989	1590.04	5.69886e-25	2	41.1004	987	1548.94	6.53913e-09	192	266.965	793	1256.12	0.000859026	NA	NA	1086	1912.69	NA	0.139281	0.0181063	0.117608
Bcin01g05490.2	1	13.2992	1085	1986.54	0.000540115	2	37.8355	985	1540.34	2.31927e-08	12	24.6258	781	1244.87	0.0245887	96	366.277	989	1620.27	9.23589e-33	2	42.092	987	1578.17	4.09705e-09	192	270.845	793	1269.49	0.000515269	NA	NA	1086	1999.84	NA	0.152095	0.0174785	0.112467
Bcin01g05510.1	1	9.29615	1085	2319.84	0.00407715	2	41.2604	985	1614.53	4.56306e-09	12	179.346	781	1183.78	3.96696e-30	96	613.248	989	1706.59	2.38636e-75	2	50.8051	987	1655.79	6.63656e-11	192	251.402	793	1363.13	0.0056847	NA	NA	1086	2329.14	NA	0.204881	0.0169736	0.0839913
Bcin01g05510.2	1	7.93738	1085	2194.05	0.00813697	2	55.4458	985	1567.45	5.22142e-12	12	158.943	781	1167.77	3.3504e-26	96	516.307	989	1677.74	5.45584e-58	2	54.8428	987	1622.9	1.00608e-11	192	240.738	793	1326.71	0.0180988	NA	NA	1086	2201.98	NA	0.186182	0.0197765	0.0868108
Bcin01g05520.1	1	0.350538	1085	2165.42	0.609464	2	131.244	985	1533.47	7.57987e-28	12	124.548	781	1163.34	1.36334e-19	96	396.097	989	1769.32	1.41276e-37	2	104.604	987	1664.72	5.83543e-22	192	245.584	793	1287.89	0.0108998	NA	NA	1086	2165.77	NA	0.148547	0.0392295	0.092101
Bcin01g05530.1	1	355.421	1085	1940.17	2.82212e-77	2	3.33287	985	1479.17	0.22687	12	35.0807	781	1188.45	0.000891065	96	414.583	989	1525.59	1.28371e-40	2	43.0847	987	1482.5	2.54781e-09	192	255.645	793	1223.53	0.00346974	NA	NA	1086	2295.59	NA	0.150579	0.0156486	0.0928517
Bcin01g05540.1	1	14.1243	1085	1661.7	0.000356518	2	6.61786	985	1421.87	0.0517816	12	26.013	781	1106.49	0.0163182	96	199.926	989	1461.78	3.61376e-09	2	33.2892	987	1428.49	2.53059e-07	192	289.366	793	1132.5	3.82231e-05	NA	NA	1086	1675.83	NA	0.104726	0.0174376	0.151576
Bcin01g05550.1	1	15.7085	1085	1865.22	0.000160092	2	1.56443	985	1464.99	0.500876	12	57.109	781	1140.36	2.59263e-07	96	396.662	989	1468.56	1.14045e-37	2	2.00129	987	1466.56	0.416598	192	267.528	793	1197.46	0.0007952	NA	NA	1086	1880.93	NA	0.174006	0.000877917	0.117358
Bcin01g05560.1	1	10.4708	1085	1594.08	0.0022491	2	3.26439	985	1410.39	0.233924	12	5.7251	781	1130.74	0.933524	96	160.947	989	1433.14	4.34228e-05	2	19.4854	987	1413.65	0.000155674	192	273.925	793	1136.46	0.000341355	NA	NA	1086	1604.56	NA	0.0901672	0.0109163	0.153461
Bcin01g05560.2	1	22.0451	1085	1744.79	6.70244e-06	2	11.3172	985	1522.39	0.00608138	12	13.0286	781	1209.88	0.400932	96	199.771	989	1545.02	3.76317e-09	2	11.3129	987	1533.71	0.00648016	192	299.484	793	1222.91	8.26708e-06	NA	NA	1086	1766.84	NA	0.101001	0.00571961	0.151414
Bcin01g05570.1	1	1.98238	1085	1468.92	0.202585	2	9.76055	985	1271.22	0.0123965	12	13.7605	781	1058.7	0.350466	96	142.436	989	1326.49	0.00163719	2	45.5065	987	1280.98	8.211e-10	192	198.766	793	1072.46	0.443271	NA	NA	1086	1470.91	NA	0.0858643	0.0274326	0.119821
Bcin01g05580.1	1	126.275	1085	1989	3.03425e-28	2	0.402284	985	1467.31	0.836815	12	25.779	781	1208.5	0.0174821	96	434.968	989	1554.04	5.15059e-44	2	86.3199	987	1467.72	3.55285e-18	192	233.037	793	1234.28	0.038942	NA	NA	1086	2115.28	NA	0.164975	0.0327395	0.0883866
Bcin01g05590.1	1	85.3565	1085	1909.99	1.71714e-19	2	21.1128	985	1466.98	6.34691e-05	12	49.3737	781	1141.54	5.12394e-06	96	388.841	989	1521.15	2.13628e-36	2	33.0619	987	1488.09	2.81563e-07	192	276.065	793	1190.91	0.000256622	NA	NA	1086	1995.35	NA	0.160861	0.0136775	0.114206
Bcin01g05600.1	1	22.6824	1085	1353.89	4.8689e-06	2	5.37769	985	1100.11	0.0900691	12	31.767	781	877.361	0.00268814	96	239.357	989	1114.53	4.71977e-14	2	9.0395	987	1105.49	0.0180618	192	190.985	793	909.128	0.610015	NA	NA	1086	1376.57	NA	0.1473	0.00556288	0.117532
Bcin01g05610.1	1	0.0190178	1085	1724.35	0.908018	2	3.96515	985	1410.3	0.170859	12	17.179	781	1140.27	0.17202	96	232.41	989	1491.94	3.79038e-13	2	77.6712	987	1414.27	2.09219e-16	192	252.852	793	1157.45	0.00482176	NA	NA	1086	1724.37	NA	0.114238	0.0381781	0.124285
Bcin01g05620.1	1	14.5485	1085	1380.28	0.000287898	2	6.93156	985	1031.02	0.044895	12	20.5502	781	804.865	0.0752577	96	340.42	989	1039.86	1.08556e-28	2	1.90536	987	1037.95	0.433964	192	205.605	793	825.415	0.31063	NA	NA	1086	1394.83	NA	0.195964	0.00109683	0.118358
Bcin01g05630.1	1	6.26828	1085	2626.59	0.0194144	2	1.44296	985	1440.3	0.528065	12	45.4365	781	1135.94	2.23982e-05	96	1162.56	989	1464.02	7.16474e-181	2	22.2782	987	1441.74	4.26024e-05	192	258.927	793	1181.37	0.00233818	NA	NA	1086	2632.85	NA	0.30452	0.00583551	0.0678229
Bcin01g05640.1	1	14.6659	1085	937.751	0.000271306	2	7.16103	985	768.126	0.0404922	12	19.3928	781	592.989	0.101261	96	160.23	989	777.521	5.05446e-05	2	2.23386	987	775.288	0.376563	192	155.744	793	612.382	1	NA	NA	1086	952.417	NA	0.143719	0.00200368	0.139696
Bcin01g05650.1	1	32.6859	1085	1849.33	3.41597e-08	2	14.363	985	1465.52	0.00148087	12	11.6445	781	1182.26	0.504989	96	327.515	989	1521.82	1.06431e-26	2	41.9319	987	1479.89	4.4035e-09	192	271.622	793	1193.9	0.000466459	NA	NA	1086	1882.02	NA	0.145467	0.0186243	0.120642
Bcin01g05660.1	1	5.10483	1085	1746.84	0.0358778	2	33.8927	985	1457.03	1.52858e-07	12	66.6088	781	1172.43	5.83222e-09	96	211.397	989	1535.45	1.5965e-10	2	44.5206	987	1490.93	1.30304e-09	192	217.998	793	1239.04	0.138154	NA	NA	1086	1751.95	NA	0.105284	0.0221731	0.108572
Bcin01g05670.1	1	26.3212	1085	1635.03	7.96447e-07	2	20.223	985	1410.48	9.66494e-05	12	26.7893	781	1104.03	0.0129209	96	203.963	989	1431.06	1.22699e-09	2	0.359592	987	1430.7	0.85553	192	279.662	793	1130.82	0.000155392	NA	NA	1086	1661.35	NA	0.109324	0.000192742	0.149899
Bcin01g05680.1	1	171.105	1085	3022.63	7.71249e-38	2	10.0268	985	1909.62	0.0109688	12	378.965	781	1188.26	4.96366e-70	96	1070.17	989	1952.46	1.31943e-162	2	32.8093	987	1919.65	3.17582e-07	192	342.392	793	1567.23	4.61359e-09	NA	NA	1086	3193.73	NA	0.249067	0.00763591	0.0796871
Bcin01g05710.1	1	3.54018	1085	2588.04	0.0836871	2	131.79	985	1571.65	5.8446e-28	12	128.533	781	1195.65	2.35535e-20	96	883.301	989	1704.74	3.59932e-126	2	1.3074	987	1703.44	0.563386	192	247.466	793	1324.18	0.00889245	NA	NA	1086	2591.59	NA	0.2541	0.000376101	0.0711888
Bcin01g05720.1	1	0.933461	1085	2521.14	0.393669	2	15.6226	985	1560.77	0.000824812	12	123.31	781	1157.61	2.35601e-19	96	911.086	989	1610.05	1.56598e-131	2	33.6554	987	1576.39	2.12577e-07	192	279.849	793	1280.92	0.000151233	NA	NA	1086	2522.07	NA	0.262802	0.0097079	0.0807223
Bcin01g05730.1	1	71.6614	1085	2305.81	1.4569e-16	2	65.5845	985	1632	4.00916e-14	12	132.832	781	1195.26	3.58744e-21	96	603.639	989	1702.18	1.35844e-73	2	4.59178	987	1697.58	0.131787	192	303.907	793	1328.09	4.11708e-06	NA	NA	1086	2377.48	NA	0.202176	0.00153792	0.101787
Bcin01g05740.1	1	5.64629	1085	1833.82	0.0269185	2	12.3549	985	1474.84	0.00377559	12	18.6947	781	1209.61	0.120472	96	346.173	989	1487.65	1.37636e-29	2	0.449518	987	1487.2	0.821721	192	246.542	793	1228.3	0.00984277	NA	NA	1086	1839.47	NA	0.158353	0.000205626	0.112778
Bcin01g05750.1	1	40.9422	1085	2343.41	5.72217e-10	2	70.6292	985	1578.71	3.58218e-15	12	83.8315	781	1190.76	5.00691e-12	96	679.296	989	1664.11	1.70249e-87	2	14.7778	987	1649.33	0.00133881	192	304.11	793	1274.6	3.98572e-06	NA	NA	1086	2384.35	NA	0.220664	0.00480045	0.0987874
Bcin01g05760.1	1	12.1152	1085	1980.83	0.000979784	2	30.1686	985	1540.09	8.98595e-07	12	120.497	781	1239.04	8.09613e-19	96	404.826	989	1576.01	5.22865e-39	2	5.7427	987	1570.26	0.0789312	192	180.556	793	1359.54	0.817391	NA	NA	1086	1992.95	NA	0.168431	0.00238929	0.0751216
Bcin01g05770.1	1	25.2048	1085	3239.94	1.38494e-06	2	116.494	985	1536.47	9.33036e-25	12	49.9488	781	1164.38	4.11118e-06	96	1583.51	989	1656.43	1.6616e-265	2	3.46242	987	1652.96	0.218056	192	322.145	793	1214.33	1.98867e-07	NA	NA	1086	3265.14	NA	0.326355	0.00071359	0.0663928
Bcin01g05780.1	1	119.901	1085	2019.7	6.98247e-27	2	5.63858	985	1555.34	0.0802107	12	64.5105	781	1179.18	1.36232e-08	96	441.758	989	1577.94	3.67742e-45	2	16.9585	987	1560.98	0.00049616	192	311.649	793	1243.7	1.18264e-06	NA	NA	1086	2139.6	NA	0.170017	0.00652674	0.119943
Bcin01g05790.1	1	63.0224	1085	2398.78	1.02669e-14	2	30.0204	985	1722.59	9.6404e-07	12	43.0729	781	1228.01	5.32841e-05	96	617.056	989	1781.72	4.80389e-76	2	29.1098	987	1752.61	1.7872e-06	192	451.513	793	1271.08	1.44436e-20	NA	NA	1086	2461.8	NA	0.19854	0.00936618	0.145276
Bcin01g05800.1	1	0.927384	1085	1427.99	0.395228	2	3.87634	985	1065.86	0.177596	12	13.5702	781	867.982	0.362836	96	354.062	989	1073.92	7.93708e-31	2	4.19276	987	1069.73	0.157454	192	184.303	793	881.552	0.74878	NA	NA	1086	1428.91	NA	0.198114	0.00234604	0.103126
Bcin01g05810.1	1	46.9778	1085	1550.93	2.86079e-11	2	6.50451	985	1194.94	0.0545269	12	78.2168	781	908.304	5.06973e-11	96	345.046	989	1205.88	2.06299e-29	2	4.43351	987	1201.45	0.141286	192	208.422	793	986.52	0.263744	NA	NA	1086	1597.9	NA	0.177184	0.00227665	0.107027
Bcin01g05830.1	1	71.3794	1085	2020.5	1.67362e-16	2	38.1994	985	1439.25	1.95596e-08	12	33.0043	781	1169.24	0.00178644	96	530.361	989	1490.14	1.84235e-60	2	12.6901	987	1477.45	0.00344185	192	237.004	793	1202.25	0.0263906	NA	NA	1086	2091.88	NA	0.201281	0.00481611	0.0899468
Bcin01g05840.1	1	15.7761	1085	1155.15	0.000154869	2	5.80595	985	848.042	0.0745488	12	24.0468	781	671.881	0.028969	96	288.214	989	866.932	7.89981e-21	2	13.0842	987	853.848	0.00287431	192	152.114	793	695.928	1	NA	NA	1086	1170.92	NA	0.195768	0.00888737	0.103323
Bcin01g05850.1	1	26.6826	1085	1596.66	6.65293e-07	2	12.5376	985	1289.56	0.00346574	12	35.6861	781	1059.54	0.000724558	96	288.932	989	1307.72	6.21231e-21	2	5.63076	987	1302.09	0.0828993	192	194.334	793	1095.22	0.538103	NA	NA	1086	1623.34	NA	0.15065	0.0029359	0.101327
Bcin01g05860.1	1	52.1928	1085	996.941	2.15842e-12	2	22.7177	985	453.391	2.97377e-05	12	62.7673	781	263.504	2.73851e-08	96	508.531	989	488.409	1.24836e-56	2	12.3009	987	476.109	0.00410932	192	127.12	793	326.271	1	NA	NA	1086	1049.13	NA	0.323912	0.00783512	0.0809699
Bcin01g05880.1	1	46.5423	1085	1568.55	3.54224e-11	2	23.808	985	717.918	1.78938e-05	12	41.5164	781	517.139	9.36729e-05	96	822.687	989	745.862	1.55773e-114	2	4.13578	987	741.726	0.161461	192	159.263	793	558.655	1	NA	NA	1086	1615.09	NA	0.336903	0.00169366	0.0652204
Bcin01g05890.1	1	284.834	1085	2545.82	3.6049e-62	2	299.296	985	1644.12	7.28469e-63	12	215.76	781	1164.36	2.97705e-37	96	583.395	989	1962.43	6.31242e-70	2	19.0054	987	1943.42	0.000194402	192	264.006	793	1380.12	0.00126127	NA	NA	1086	2830.66	NA	0.169935	0.00553601	0.0769011
Bcin01g05900.1	1	29.0896	1085	2668.71	2.01503e-07	2	139.703	985	1636.13	1.28594e-29	12	73.1495	781	1201.94	4.09123e-10	96	886.557	989	1782.15	8.49139e-127	2	6.31752	987	1775.84	0.0611898	192	361.047	793	1275.09	1.06706e-10	NA	NA	1086	2697.8	NA	0.246905	0.00175943	0.100551
Bcin01g05920.1	1	16.0287	1085	1780.56	0.000136416	2	4.83342	985	1458.51	0.115294	12	36.7397	781	1196.39	0.000505316	96	311.047	989	1469.51	3.35194e-24	2	6.16818	987	1463.34	0.065376	192	225.376	793	1233.13	0.0768414	NA	NA	1086	1796.59	NA	0.147151	0.00291805	0.106621
Bcin01g05930.1	1	63.7166	1085	1836.08	7.28459e-15	2	25.7065	985	1470.04	7.36426e-06	12	67.8778	781	1140.56	3.4835e-09	96	334.567	989	1501.51	8.77718e-28	2	5.76453	987	1495.75	0.0781447	192	261.601	793	1208.44	0.00168859	NA	NA	1086	1899.79	NA	0.149352	0.00257331	0.11678
Bcin01g05940.1	1	49.2494	1085	1840.26	9.25943e-12	2	71.1271	985	1466.81	2.83081e-15	12	63.9868	781	1164.56	1.67542e-08	96	268.518	989	1571.74	5.12108e-18	2	33.8027	987	1537.94	1.98408e-07	192	238.264	793	1228.55	0.023288	NA	NA	1086	1889.51	NA	0.122508	0.0154221	0.108705
Bcin01g05950.1	1	26.5059	1085	2044.67	7.26611e-07	2	97.5608	985	1510.27	8.3051e-21	12	76.9297	781	1201.12	8.70631e-11	96	401.673	989	1642.99	1.72142e-38	2	35.1637	987	1607.83	1.05605e-07	192	232.217	793	1278.05	0.0420398	NA	NA	1086	2071.17	NA	0.160156	0.0140206	0.0925902
Bcin01g05960.1	1	162.421	1085	2321.07	5.59824e-36	2	95.2094	985	1583.48	2.58162e-20	12	87.9659	781	1205.86	8.90534e-13	96	592.008	989	1729.06	1.74971e-71	2	50.3664	987	1678.69	8.16968e-11	192	289.654	793	1293.83	3.6705e-05	NA	NA	1086	2483.49	NA	0.18939	0.0161128	0.0926638
Bcin01g05970.1	1	1.07682	1085	2045.56	0.357063	2	3.84771	985	1482.11	0.179903	12	37.5739	781	1158.78	0.000377872	96	492.771	989	1552.79	6.94217e-54	2	66.837	987	1485.96	3.46679e-14	192	285.751	793	1196.36	6.4821e-05	NA	NA	1086	2046.64	NA	0.189073	0.0256449	0.109641
Bcin01g05980.1	1	33.9965	1085	1968.59	1.78721e-08	2	23.2438	985	1541.38	2.32746e-05	12	60.5324	781	1222.83	6.66025e-08	96	388.552	989	1580.04	2.38333e-36	2	15.415	987	1564.62	0.00100183	192	258.018	793	1283.36	0.00260887	NA	NA	1086	2002.59	NA	0.161456	0.00640542	0.107215
Bcin01g05990.1	1	22.0707	1085	1238.08	6.61906e-06	2	12.6723	985	1119.21	0.003256	12	18.9934	781	896.675	0.111931	96	100.676	989	1137.4	0.35651	2	5.5181	987	1131.89	0.0870959	192	203.545	793	915.669	0.348369	NA	NA	1086	1260.15	NA	0.0736828	0.00403859	0.14897
Bcin01g06000.1	1	52.9764	1085	1596.61	1.46388e-12	2	10.6373	985	1384.58	0.00828971	12	16.463	781	1151.02	0.2016	96	196.642	989	1399.96	8.59078e-09	2	4.74496	987	1395.22	0.123165	192	217.097	793	1167.49	0.14751	NA	NA	1086	1649.58	NA	0.106237	0.0025635	0.117288
Bcin01g06010.1	1	88.9538	1085	2026.54	2.91302e-20	2	24.2097	985	1501.77	1.4811e-05	12	49.2744	781	1153.73	5.31698e-06	96	490.732	989	1535.81	1.56273e-53	2	9.82607	987	1525.98	0.012672	192	298.766	793	1203.01	9.21885e-06	NA	NA	1086	2115.5	NA	0.187585	0.00375607	0.114205
Bcin01g06020.1	1	132.358	1085	2085.82	1.53792e-29	2	25.2825	985	1552.34	8.97796e-06	12	122.742	781	1202.12	3.0367e-19	96	471.769	989	1614.05	2.92161e-50	2	36.427	987	1577.62	5.86916e-08	192	227.479	793	1324.86	0.0642551	NA	NA	1086	2218.18	NA	0.173039	0.013361	0.0834366
Bcin01g06030.1	1	11.4029	1085	1750.63	0.00140598	2	14.5405	985	1477.66	0.00136513	12	38.9153	781	1185.4	0.000236605	96	244.935	989	1505.69	8.63532e-15	2	13.4979	987	1492.2	0.00238374	192	253.335	793	1224.32	0.00456536	NA	NA	1086	1762.03	NA	0.121227	0.0066806	0.125385
Bcin01g06040.1	1	61.4115	1085	2059.45	2.27476e-14	2	53.8028	985	1563.75	1.15042e-11	12	70.2689	781	1198.63	1.33284e-09	96	394.053	989	1665.4	3.03847e-37	2	47.8467	987	1617.55	2.70872e-10	192	294.853	793	1268.9	1.68137e-05	NA	NA	1086	2120.87	NA	0.153761	0.0186699	0.115053
Bcin01g06050.1	1	0.874336	1085	808.836	0.410356	2	15.4042	985	660.17	0.000912252	12	14.5291	781	505.353	0.302702	96	120.853	989	687.983	0.046269	2	12.4089	987	675.574	0.00391107	192	140.288	793	519.882	1	NA	NA	1086	809.71	NA	0.128162	0.0131594	0.148772
Bcin01g06060.1	1	3.18387	1085	2183.17	0.101729	2	95.1858	985	1491.19	2.60538e-20	12	35.7536	781	1117.62	0.000708705	96	550.52	989	1632.65	4.87273e-64	2	46.272	987	1586.37	5.73093e-10	192	337.812	793	1153.38	1.10052e-08	NA	NA	1086	2186.35	NA	0.197805	0.0166258	0.121378
Bcin01g06070.1	1	181.041	1085	2353.35	5.92344e-40	2	35.2146	985	1604.87	8.15099e-08	12	99.0469	781	1175.84	8.17242e-15	96	650.299	989	1703.05	3.91633e-82	2	62.9618	987	1640.09	2.20769e-13	192	329.992	793	1274.88	4.90767e-08	NA	NA	1086	2534.39	NA	0.200237	0.0193869	0.101609
Bcin01g06080.1	1	53.2856	1085	2315.95	1.25947e-12	2	186.278	985	1638.33	2.18308e-39	12	160.536	781	1243.27	1.66343e-26	96	470.493	989	1845.46	4.84586e-50	2	20.8566	987	1824.6	8.27254e-05	192	234.519	793	1403.81	0.0336353	NA	NA	1086	2369.24	NA	0.164474	0.00729103	0.0819827
Bcin01g06090.1	1	68.5635	1085	1894.32	6.71739e-16	2	17.6946	985	1564.91	0.000315773	12	62.9142	781	1240.8	2.58542e-08	96	309.13	989	1585.19	6.48964e-24	2	2.58926	987	1582.6	0.321717	192	261.197	793	1303.71	0.0017756	NA	NA	1086	1962.88	NA	0.135905	0.00113833	0.114832
Bcin01g06100.1	1	0.0156173	1085	1917.02	0.917144	2	24.6505	985	1522.32	1.20589e-05	12	52.3648	781	1116.21	1.63509e-06	96	345.986	989	1571.03	1.47221e-29	2	24.0613	987	1546.97	1.86683e-05	192	353.738	793	1168.58	4.81005e-10	NA	NA	1086	1917.03	NA	0.151279	0.0105205	0.154668
Bcin01g06110.1	1	84.8178	1085	1777.97	2.24325e-19	2	40.609	985	1474.23	6.19243e-09	12	63.8822	781	1146.58	1.74401e-08	96	240.63	989	1537.34	3.21453e-14	2	22.5001	987	1514.84	3.842e-05	192	263.773	793	1210.46	0.0012996	NA	NA	1086	1862.79	NA	0.113189	0.0105837	0.124074
Bcin01g06120.1	1	5.43892	1085	1976.42	0.0300407	2	4.43473	985	1618.63	0.138226	12	82.7962	781	1274.46	7.68589e-12	96	335.953	989	1640.46	5.36257e-28	2	17.3981	987	1623.06	0.000405992	192	261.377	793	1357.25	0.00173675	NA	NA	1086	1981.85	NA	0.143864	0.00745035	0.111929
Bcin01g06130.1	1	3.77599	1085	1228.95	0.0735046	2	8.29787	985	1097.83	0.0242892	12	17.2029	781	903.855	0.171071	96	118.799	989	1110.15	0.0599404	2	4.02205	987	1106.13	0.169718	192	176.774	793	921.058	0.878204	NA	NA	1086	1232.73	NA	0.0876393	0.0029671	0.130408
Bcin01g06140.1	1	11.9342	1085	1758.97	0.00107446	2	1.14143	985	1485.08	0.603612	12	22.9782	781	1235.85	0.0391554	96	217.027	989	1541.95	3.28384e-11	2	55.7261	987	1486.22	6.67405e-12	192	226.25	793	1258.83	0.0714295	NA	NA	1086	1770.91	NA	0.106195	0.0272678	0.110708
Bcin01g06150.1	1	55.4637	1085	2022.47	4.30725e-13	2	32.973	985	1519.92	2.37542e-07	12	54.6422	781	1250.2	6.78831e-07	96	465.3	989	1557.17	3.76281e-49	2	4.28067	987	1552.89	0.151322	192	215.082	793	1304.84	0.170411	NA	NA	1086	2077.94	NA	0.182648	0.00168033	0.0844281
Bcin01g06170.1	1	2.00373	1085	1662.42	0.200052	2	9.83528	985	1423.42	0.0119861	12	17.8424	781	1144.2	0.147955	96	208.075	989	1454.35	3.99866e-10	2	21.087	987	1433.26	7.43727e-05	192	261.378	793	1162.05	0.00173675	NA	NA	1086	1664.43	NA	0.109884	0.011136	0.138033
Bcin01g06200.1	1	21.4894	1085	1496.5	8.83917e-06	2	2.27669	985	1312	0.365281	12	24.468	781	1039.46	0.0257518	96	176.607	989	1319.89	1.28216e-06	2	5.61535	987	1314.28	0.0834691	192	248.07	793	1063.93	0.0083131	NA	NA	1086	1517.99	NA	0.103873	0.00330273	0.145905
Bcin01g06210.1	1	39.4843	1085	2360.45	1.17544e-09	2	199.211	985	1573.14	4.16498e-42	12	129.849	781	1155.67	1.32696e-20	96	533.279	989	1827.17	5.6067e-61	2	54.8252	987	1772.35	1.01318e-11	192	287.616	793	1285.52	4.91067e-05	NA	NA	1086	2399.94	NA	0.178471	0.0183482	0.0962556
Bcin01g06220.1	1	171.467	1085	2041.37	6.45201e-38	2	5.82374	985	1453.46	0.0739754	12	14.7499	781	1205.96	0.290013	96	512.419	989	1528.95	2.617e-57	2	69.6595	987	1459.29	9.13172e-15	192	232.759	793	1220.71	0.0399989	NA	NA	1086	2212.83	NA	0.18334	0.0249237	0.0832795
Bcin01g06220.2	1	192.14	1085	2043.6	2.4679e-42	2	15.9033	985	1491.34	0.000725418	12	21.137	781	1200.31	0.0645831	96	463.721	989	1579.88	6.96758e-49	2	72.6358	987	1507.24	2.22585e-15	192	269.898	793	1221.44	0.000583133	NA	NA	1086	2235.74	NA	0.167282	0.0262025	0.0973625
Bcin01g06230.1	1	21.3077	1085	1797.53	9.68146e-06	2	55.8203	985	1490.56	4.35931e-12	12	34.8593	781	1196.97	0.000960924	96	229.824	989	1567.7	8.14309e-13	2	21.3214	987	1546.38	6.65932e-05	192	258.728	793	1231.83	0.00239524	NA	NA	1086	1818.83	NA	0.111027	0.0103003	0.124991
Bcin01g06240.1	1	3.09706	1085	889.843	0.106928	2	13.4808	985	734.892	0.00223256	12	20.4636	781	548.564	0.0769525	96	133.993	989	755.85	0.00688066	2	7.47742	987	748.373	0.036289	192	165.864	793	569.027	0.994248	NA	NA	1086	892.94	NA	0.129536	0.00722867	0.160347
Bcin01g06250.1	1	29.8519	1085	2242.28	1.38764e-07	2	27.1154	985	1476.95	3.78049e-06	12	52.8762	781	1149.54	1.34516e-06	96	693.787	989	1548.5	3.40355e-90	2	44.4309	987	1504.07	1.35569e-09	192	274.537	793	1202.42	0.000314298	NA	NA	1086	2272.14	NA	0.230467	0.0147594	0.0911974
Bcin01g06260.1	1	12.8786	1085	1886.62	0.000667881	2	35.927	985	1557.35	5.81264e-08	12	52.8226	781	1188.43	1.3727e-06	96	291.179	989	1595.44	2.92117e-21	2	2.16182	987	1593.27	0.388354	192	316.091	793	1241.26	5.56398e-07	NA	NA	1086	1899.49	NA	0.132787	0.000985855	0.144147
Bcin01g06260.2	1	16.5594	1085	1773.97	0.00010432	2	43.0303	985	1463.52	1.96979e-09	12	41.7298	781	1149.34	8.67575e-05	96	262.691	989	1511.27	3.31557e-17	2	4.72835	987	1506.55	0.124104	192	272.448	793	1191.07	0.000417872	NA	NA	1086	1790.53	NA	0.127647	0.00229761	0.132388
Bcin01g06260.3	1	13.1626	1085	1895.65	0.000577662	2	40.315	985	1555.29	7.12917e-09	12	47.056	781	1263.06	1.22677e-05	96	293.45	989	1602.2	1.35906e-21	2	6.59171	987	1595.61	0.0540246	192	245.174	793	1310.12	0.0113808	NA	NA	1086	1908.81	NA	0.132852	0.00298422	0.110996
Bcin01g06260.4	1	5.3217	1085	1834.81	0.0319711	2	30.2128	985	1499.36	8.79861e-07	12	39.0815	781	1205.77	0.000223685	96	294.062	989	1540.74	1.10474e-21	2	11.1671	987	1529.58	0.0069314	192	254.508	793	1244.86	0.00397188	NA	NA	1086	1840.13	NA	0.137069	0.00520526	0.118632
Bcin01g06260.5	1	27.8485	1085	1901.37	3.72717e-07	2	48.9242	985	1525.03	1.17006e-10	12	22.9984	781	1222.36	0.0389471	96	324.097	989	1577.28	3.5495e-26	2	3.32323	987	1573.95	0.232231	192	279.674	793	1245.36	0.000155152	NA	NA	1086	1929.22	NA	0.143619	0.00147264	0.123934
Bcin01g06260.6	1	11.9359	1085	1783.31	0.00107371	2	52.8189	985	1425.07	1.83334e-11	12	35.4441	781	1130.27	0.000786445	96	290.436	989	1492.88	3.74905e-21	2	14.9881	987	1477.89	0.00121511	192	259.356	793	1165.71	0.00222029	NA	NA	1086	1795.25	NA	0.138259	0.00713491	0.123463
Bcin01g06270.1	1	9.02059	1085	2015.85	0.00467537	2	5.34782	985	1577.73	0.091242	12	63.31	781	1242.51	2.20215e-08	96	407.946	989	1607.9	1.60635e-39	2	24.8211	987	1583.08	1.31558e-05	192	271.914	793	1305.82	0.000448057	NA	NA	1086	2024.87	NA	0.165991	0.0100996	0.110641
Bcin01g06280.1	1	72.1141	1085	2110.32	1.16611e-16	2	39.0519	985	1654.04	1.30202e-08	12	115.705	781	1280.07	6.48038e-18	96	415.902	989	1694.42	7.75337e-41	2	1.33238	987	1693.09	0.557303	192	258.267	793	1395.77	0.00253656	NA	NA	1086	2182.44	NA	0.159983	0.000512518	0.0993462
Bcin01g06290.1	1	5.4902	1085	2395.92	0.0292441	2	32.8423	985	1570.01	2.53017e-07	12	26.566	781	1145.36	0.0138364	96	781.195	989	1614.72	1.22856e-106	2	11.8707	987	1602.85	0.00502358	192	398.086	793	1171.93	2.33784e-14	NA	NA	1086	2401.41	NA	0.244546	0.00371599	0.124617
Bcin01g06300.1	1	1.78347	1085	2466.18	0.22826	2	3.87302	985	1380.63	0.177844	12	48.9102	781	1097.71	6.09003e-06	96	1080.91	989	1385.27	1.01811e-164	2	0.769463	987	1384.5	0.714981	192	234.009	793	1146.62	0.03541	NA	NA	1086	2467.96	NA	0.304513	0.000216772	0.0659247
Bcin01g06310.1	1	4.94522	1085	949.419	0.0390948	2	2.04077	985	825.561	0.405831	12	23.3043	781	635.337	0.0357362	96	117.151	989	832.268	0.0732145	2	4.66665	987	827.602	0.127503	192	166.92	793	658.641	0.987017	NA	NA	1086	954.365	NA	0.108858	0.0043363	0.155104
Bcin01g06320.1	1	192.298	1085	1904.6	2.2851e-42	2	9.3859	985	1536.43	0.0147584	12	57.3614	781	1204.98	2.34633e-07	96	316.709	989	1587.9	4.70458e-25	2	42.0823	987	1545.81	4.1119e-09	192	274.088	793	1262.34	0.000334491	NA	NA	1086	2096.9	NA	0.128969	0.0171366	0.111613
Bcin01g06330.1	1	9.87637	1085	1764.11	0.00303808	2	39.4583	985	1442.61	1.07397e-08	12	22.9943	781	1182.81	0.0389742	96	256.413	989	1507.7	2.4237e-16	2	25.6312	987	1482.06	9.02207e-06	192	236.801	793	1205.8	0.0269008	NA	NA	1086	1773.98	NA	0.124713	0.0124663	0.115174
Bcin01g06340.1	1	16.0036	1085	2072.48	0.000138039	2	14.7942	985	1448.1	0.00121349	12	71.4075	781	1141.61	8.32562e-10	96	421.609	989	1650.87	8.75135e-42	2	187.979	987	1462.89	2.13332e-39	192	235.077	793	1213.02	0.0318208	NA	NA	1086	2088.48	NA	0.156263	0.0696716	0.0871279	deoxyuridine 5 -triphosphate nucleotidohydrolase	F:dUTP diphosphatase activity; P:dUTP metabolic process; F:hydrolase activity
Bcin01g06370.1	1	89.7758	1085	1676.92	1.94376e-20	2	23.5601	985	1361.38	2.0084e-05	12	61.257	781	1099.39	4.983e-08	96	264.467	989	1412.45	1.88066e-17	2	27.508	987	1384.94	3.76407e-06	192	200.739	793	1160.64	0.402836	NA	NA	1086	1766.69	NA	0.128465	0.013362	0.0975092
Bcin01g06380.1	1	45.938	1085	2446.57	4.7753e-11	2	89.7755	985	1543.14	3.54378e-19	12	95.8472	781	1124.52	3.17255e-14	96	789.568	989	1657	3.15321e-108	2	24.0813	987	1632.92	1.85031e-05	192	322.774	793	1220.37	1.81135e-07	NA	NA	1086	2492.51	NA	0.238818	0.00728379	0.0976281
Bcin01g06390.1	1	1.09072	1085	866.146	0.353729	2	3.03842	985	743.916	0.258639	12	20.5325	781	576.921	0.0755888	96	115.269	989	750.877	0.0912172	2	3.92287	987	746.954	0.177426	192	146.462	793	597.454	1	NA	NA	1086	867.236	NA	0.116855	0.00397684	0.148477
Bcin01g06410.1	1	10.0232	1085	3184.5	0.00282056	2	136.794	985	1707.2	5.28353e-29	12	69.4533	781	1151.27	1.85726e-09	96	1316.67	989	1867.83	1.33854e-211	2	23.8344	987	1843.99	2.07664e-05	192	486.472	793	1220.73	6.65721e-25	NA	NA	1086	3194.52	NA	0.290333	0.00525563	0.10727
Bcin01g06420.1	1	3.17597	1085	1633.98	0.102177	2	12.2581	985	1379.36	0.00394283	12	16.7655	781	1116.63	0.188571	96	220.639	989	1413.34	1.17533e-11	2	21.7214	987	1391.62	5.52485e-05	192	245.965	793	1133.4	0.0104567	NA	NA	1086	1637.16	NA	0.117391	0.0115569	0.130866
Bcin01g06430.1	1	80.4183	1085	1955.13	1.94663e-18	2	47.901	985	1523.67	1.9121e-10	12	93.8923	781	1185.01	7.2858e-14	96	339.728	989	1615.41	1.38907e-28	2	43.8356	987	1571.57	1.79309e-09	192	244.768	793	1278.9	0.0118835	NA	NA	1086	2035.55	NA	0.140435	0.0181205	0.101181
Bcin01g06440.1	1	67.7207	1085	1961.07	1.01148e-15	2	19.1422	985	1509.62	0.000160725	12	88.109	781	1168.32	8.3763e-13	96	420.388	989	1540.68	1.39502e-41	2	11.92	987	1528.76	0.00491521	192	253.195	793	1256.43	0.00464349	NA	NA	1086	2028.79	NA	0.170813	0.00484337	0.102879
Bcin01g06450.1	1	70.6084	1085	1876.91	2.45571e-16	2	25.6703	985	1381.02	7.49193e-06	12	32.5824	781	1155.25	0.00205398	96	435.075	989	1441.84	4.94366e-44	2	35.1432	987	1406.69	1.06538e-07	192	193.194	793	1187.83	0.563083	NA	NA	1086	1947.52	NA	0.179951	0.0145356	0.0799071
Bcin01g06460.1	1	147.868	1085	1931.14	7.37556e-33	2	44.1242	985	1553.47	1.1684e-09	12	43.5927	781	1260.15	4.42436e-05	96	332.115	989	1599.02	2.09772e-27	2	1.42524	987	1597.6	0.535081	192	249.73	793	1303.74	0.00690008	NA	NA	1086	2079	NA	0.137662	0.000590764	0.103513
Bcin01g06470.1	1	29.9778	1085	1867.45	1.3046e-07	2	33.7734	985	1425.75	1.61826e-07	12	70.0215	781	1166.88	1.47311e-09	96	406.372	989	1461.08	2.91514e-39	2	1.55864	987	1459.52	0.504829	192	188.845	793	1236.91	0.654324	NA	NA	1086	1897.43	NA	0.176272	0.000676093	0.0819154
Bcin01g06480.1	1	5.27712	1085	1796.6	0.0327248	2	2.17511	985	1488.75	0.382201	12	56.193	781	1174.48	3.7088e-07	96	295.561	989	1501.04	6.66937e-22	2	10.1202	987	1490.92	0.0111127	192	258.07	793	1230.68	0.00259477	NA	NA	1086	1801.88	NA	0.140238	0.00480187	0.12245
Bcin01g06490.1	1	4.31589	1085	1736.92	0.0547214	2	16.1991	985	1478.11	0.000632553	12	37.3581	781	1196.11	0.000408321	96	224.446	989	1512.47	3.93117e-12	2	18.1625	987	1494.31	0.000286035	192	244.637	793	1233.47	0.0120477	NA	NA	1086	1741.23	NA	0.113137	0.00915521	0.123315
Bcin01g06500.1	1	69.7389	1085	2003.09	3.76573e-16	2	40.1038	985	1520.01	7.90249e-09	12	48.1338	781	1247.4	8.19027e-06	96	427.847	989	1575.24	7.99296e-43	2	15.1272	987	1560.12	0.00114046	192	224.482	793	1295.53	0.0828662	NA	NA	1086	2072.83	NA	0.170064	0.00601287	0.0892286
Bcin01g06510.1	1	2.56353	1085	1441.22	0.144339	2	6.98397	985	1257.97	0.043931	12	23.0998	781	1040.9	0.0378373	96	172.981	989	1268.24	2.99531e-06	2	3.28557	987	1264.95	0.236116	192	193.97	793	1064	0.545874	NA	NA	1086	1443.78	NA	0.106775	0.00202807	0.119731
Bcin01g06520.1	1	21.0243	1085	1573.72	1.11679e-05	2	16.1238	985	1408.1	0.00065493	12	15.3152	781	1170.97	0.258383	96	144.771	989	1428.95	0.0010742	2	4.72547	987	1424.23	0.124229	192	221.817	793	1186.29	0.103018	NA	NA	1086	1594.75	NA	0.0829993	0.00270918	0.127171
Bcin01g06550.1	1	7.52987	1085	1854.68	0.0100319	2	14.8627	985	1575.47	0.00117517	12	88.8883	781	1225.95	6.0121e-13	96	244.343	989	1610.34	1.03546e-14	2	20.0053	987	1590.33	0.000123136	192	260.628	793	1314.84	0.00189915	NA	NA	1086	1862.21	NA	0.1149	0.00940734	0.122559
Bcin01g06560.1	1	9.84516	1085	1682.18	0.00308523	2	32.71	985	1326.3	2.69541e-07	12	43.0501	781	1064.42	5.37309e-05	96	318.399	989	1363.79	2.61294e-25	2	4.77373	987	1359.01	0.121544	192	218.835	793	1107.47	0.129767	NA	NA	1086	1692.03	NA	0.157999	0.00236886	0.108592
Bcin01g06570.1	1	0.111797	1085	1743.38	0.776938	2	3.31972	985	1457.15	0.22813	12	36.2469	781	1162.58	0.000598048	96	265.292	989	1478.09	1.44236e-17	2	17.6155	987	1460.47	0.00036765	192	258.328	793	1198.82	0.00251785	NA	NA	1086	1743.49	NA	0.130918	0.00869301	0.127481
Bcin01g06580.1	1	6.41272	1085	1505.69	0.0179848	2	15.9963	985	1335.37	0.000695544	12	57.3073	781	1059.12	2.39619e-07	96	153.142	989	1352.55	0.000216993	2	1.18291	987	1351.37	0.594986	192	218.944	793	1116.43	0.128618	NA	NA	1086	1512.11	NA	0.091898	0.000709846	0.131385
Bcin01g06580.2	1	3.0175	1085	1522.17	0.11186	2	4.51044	985	1318.95	0.133603	12	33.646	781	1097.27	0.00144447	96	191.889	989	1330.28	2.95046e-08	2	6.81947	987	1323.46	0.0487738	192	188.035	793	1130.91	0.671515	NA	NA	1086	1525.18	NA	0.111312	0.00395585	0.109076
Bcin01g06590.1	1	4.44111	1085	967.213	0.0511687	2	7.24655	985	815.544	0.038985	12	11.2724	781	634.184	0.53464	96	134.729	989	832.484	0.00611181	2	9.69287	987	822.791	0.0134324	192	170.088	793	645.456	0.962158	NA	NA	1086	971.654	NA	0.120717	0.00868478	0.152398
Bcin01g06600.1	1	0.20508	1085	1335.93	0.699652	2	18.3758	985	1022.76	0.000228678	12	28.5173	781	738.996	0.00758557	96	294.727	989	1041.21	8.83332e-22	2	0.0651855	987	1041.14	0.972752	192	255.251	793	767.514	0.00363381	NA	NA	1086	1336.14	NA	0.180711	3.99683e-05	0.156507
Bcin01g06610.1	1	0.765038	1085	783.175	0.442752	2	3.88055	985	661.57	0.177293	12	12.6261	781	524.583	0.4295	96	111.534	989	671.641	0.13669	2	6.19072	987	665.451	0.0646833	192	124.361	793	537.209	1	NA	NA	1086	783.94	NA	0.123698	0.00686588	0.137924
Bcin01g06620.1	1	2.45651	1085	2087.3	0.153473	2	65.4845	985	1476.32	4.20194e-14	12	65.0651	781	1155.1	1.08551e-08	96	486.991	989	1600.31	6.93534e-53	2	58.5012	987	1541.8	1.81625e-12	192	256.156	793	1220.16	0.00326268	NA	NA	1086	2089.75	NA	0.184799	0.0221995	0.0972038
Bcin01g06630.1	1	1.0307	1085	887.717	0.368594	2	5.66785	985	721.879	0.0791946	12	13.2643	781	565.596	0.384092	96	152.328	989	735.389	0.000254944	2	7.84287	987	727.547	0.030878	192	143.019	793	578.86	1	NA	NA	1086	888.748	NA	0.145224	0.0074771	0.136349
Bcin01g06640.1	1	12.4446	1085	1954.21	0.000830376	2	8.96245	985	1477.44	0.0179243	12	43.9288	781	1193.54	3.91195e-05	96	454.478	989	1499.73	2.6086e-47	2	13.3272	987	1486.4	0.00257526	192	239.97	793	1237.47	0.0196304	NA	NA	1086	1966.65	NA	0.186686	0.00547441	0.0985723
Bcin01g06650.1	1	350.845	1085	2073.14	2.65487e-76	2	35.653	985	1558.46	6.60327e-08	12	73.7805	781	1137.52	3.17246e-10	96	451.456	989	1621.68	8.48114e-47	2	27.564	987	1594.11	3.66713e-06	192	347.16	793	1211.3	1.86966e-09	NA	NA	1086	2423.98	NA	0.155514	0.00949499	0.119587
Bcin01g06660.1	1	2.04132	1085	1074.01	0.195537	2	4.63116	985	911.182	0.126506	12	14.6776	781	714.879	0.294141	96	132.222	989	941.785	0.00911239	2	25.9722	987	915.813	7.69576e-06	192	181.625	793	729.556	0.79853	NA	NA	1086	1076.05	NA	0.107128	0.021043	0.147155
Bcin01g06670.1	1	7.05772	1085	1832.24	0.0128527	2	67.238	985	1470.28	1.81963e-14	12	21.7952	781	1147.64	0.0541296	96	242.41	989	1589.83	1.86947e-14	2	52.313	987	1537.52	3.27104e-11	192	300.842	793	1169.44	6.67105e-06	NA	NA	1086	1839.3	NA	0.113593	0.0245138	0.140974
Bcin01g06690.1	1	7.74611	1085	1667.56	0.00899141	2	4.64254	985	1091.45	0.125893	12	6.48179	781	858.979	0.896053	96	548.284	989	1119.28	1.21235e-63	2	23.1863	987	1096.09	2.79275e-05	192	225.989	793	865.46	0.0730103	NA	NA	1086	1675.31	NA	0.244031	0.0103198	0.100583
Bcin01g06700.1	1	56.5613	1085	1976.58	2.49004e-13	2	46.6487	985	1502.69	3.49112e-10	12	30.7948	781	1191.84	0.00367365	96	405.202	989	1571.38	4.53744e-39	2	22.0392	987	1549.34	4.75885e-05	192	280.057	793	1222.63	0.000146784	NA	NA	1086	2033.14	NA	0.164691	0.00895766	0.113827
Bcin01g06700.2	1	55.2616	1085	2049.38	4.75753e-13	2	85.2873	985	1498.37	3.08171e-18	12	30.1367	781	1191.91	0.0045282	96	456.447	989	1592.94	1.20806e-47	2	9.27842	987	1583.66	0.0161973	192	276.325	793	1222.05	0.00024764	NA	NA	1086	2104.64	NA	0.17758	0.00360976	0.107504
Bcin01g06710.1	1	22.7672	1085	2003.15	4.66382e-06	2	51.3637	985	1614.8	3.66295e-11	12	53.5581	781	1245.99	1.02984e-06	96	334.749	989	1668.41	8.23113e-28	2	2.24093	987	1666.16	0.375375	192	315.251	793	1299.55	6.40116e-07	NA	NA	1086	2025.92	NA	0.141668	0.000948375	0.133416
Bcin01g06720.1	1	46.3227	1085	1553.24	3.94893e-11	2	25.4326	985	1333.59	8.36132e-06	12	30.6981	781	1092.39	0.00379013	96	189.57	989	1363.67	5.33824e-08	2	4.63933	987	1359.03	0.129037	192	210.503	793	1123.09	0.232166	NA	NA	1086	1599.56	NA	0.105683	0.00258636	0.117352
Bcin01g06730.1	1	41.3766	1085	1442.76	4.60908e-10	2	18.2903	985	1206.27	0.000238037	12	30.129	781	965.725	0.00453958	96	216.181	989	1226.58	4.17098e-11	2	2.01729	987	1224.56	0.413513	192	210.417	793	995.854	0.233315	NA	NA	1086	1484.14	NA	0.126991	0.00118501	0.123605
Bcin01g06740.1	1	39.4356	1085	1487.96	1.2033e-09	2	3.9422	985	1290.15	0.172623	12	16.7172	781	1053.72	0.190673	96	181.36	989	1306.6	4.1044e-07	2	12.5156	987	1294.09	0.00372728	192	219.705	793	1070.44	0.121371	NA	NA	1086	1527.4	NA	0.105364	0.00727113	0.127641
Bcin01g06740.2	1	46.5297	1085	1513.21	3.56203e-11	2	1.81162	985	1342.33	0.449429	12	13.3715	781	1102.59	0.376625	96	155.176	989	1358.04	0.000144207	2	13.8961	987	1344.14	0.00199093	192	226.371	793	1115.96	0.0707031	NA	NA	1086	1559.74	NA	0.0897586	0.00803792	0.13094
Bcin01g06750.1	1	4.33707	1085	1174.24	0.0540785	2	1.4206	985	1020.95	0.533253	12	21.7584	781	806.833	0.0546685	96	138.613	989	1035.63	0.00319455	2	13.2619	987	1022.37	0.00265337	192	192.357	793	828.592	0.581059	NA	NA	1086	1178.58	NA	0.104185	0.0099679	0.14458
Bcin01g06760.1	1	6.02753	1085	967.052	0.0220394	2	7.80227	985	746.659	0.0303252	12	30.4383	781	564.952	0.00411639	96	201.937	989	765.115	2.1139e-09	2	10.6535	987	754.461	0.00874242	192	151.269	793	595.39	1	NA	NA	1086	973.079	NA	0.170315	0.00898518	0.127581
Bcin01g06790.1	1	11.9337	1085	1160.29	0.00107455	2	4.71727	985	957.357	0.121612	12	38.3321	781	749.543	0.000290239	96	194.102	989	966.19	1.66482e-08	2	4.11581	987	962.074	0.162839	192	169.481	793	787.875	0.967997	NA	NA	1086	1172.23	NA	0.141635	0.00300327	0.123669
Bcin01g06800.1	1	45.7355	1085	1909.82	5.27757e-11	2	39.4172	985	1499.04	1.09489e-08	12	25.7775	781	1223.37	0.0174877	96	334.645	989	1575.17	8.53929e-28	2	36.7119	987	1538.46	5.15603e-08	192	249.899	793	1249.14	0.0067632	NA	NA	1086	1955.55	NA	0.143815	0.0157771	0.107395
Bcin01g06810.1	1	56.648	1085	1769.04	2.38733e-13	2	38.5424	985	1476.27	1.66015e-08	12	37.1476	781	1188.78	0.000438621	96	230.961	989	1538.08	5.82701e-13	2	23.2666	987	1514.81	2.69522e-05	192	250.344	793	1225.92	0.00643255	NA	NA	1086	1825.69	NA	0.111044	0.0111863	0.120363
Bcin01g06820.1	1	2.3375	1085	1393.59	0.164077	2	26.2456	985	1166.04	5.69833e-06	12	25.0675	781	928.05	0.0216211	96	198.111	989	1195.48	5.84107e-09	2	3.19358	987	1192.29	0.246195	192	212.927	793	953.118	0.197979	NA	NA	1086	1395.93	NA	0.124033	0.00199944	0.133309
Bcin01g06840.1	1	23.7383	1085	2609.95	2.87493e-06	2	39.5577	985	1521.7	1.02409e-08	12	33.076	781	1204.38	0.00174445	96	1036.25	989	1573.7	6.21017e-156	2	12.4429	987	1561.26	0.00385322	192	284.241	793	1237.46	8.02935e-05	NA	NA	1086	2633.69	NA	0.281407	0.00337904	0.0771895
Bcin01g06850.1	1	431.471	1085	2175.79	1.6408e-93	2	63.284	985	1376.69	1.19959e-13	12	126.7	781	971.015	5.29053e-20	96	729.455	989	1446.34	7.07973e-97	2	6.36295	987	1439.97	0.0599553	192	278.974	793	1097.72	0.000170997	NA	NA	1086	2607.26	NA	0.218198	0.00190332	0.0834483
Bcin01g06860.1	1	0.761137	1085	1267.13	0.443939	2	3.66905	985	1107.8	0.194637	12	16.7406	781	893.707	0.189669	96	151.827	989	1115.3	0.000281392	2	3.83227	987	1111.47	0.184569	192	197.349	793	910.448	0.472895	NA	NA	1086	1267.89	NA	0.106654	0.00269206	0.138632
Bcin01g06870.1	1	73.5831	1085	1856.79	5.63384e-17	2	29.1908	985	1527.05	1.42255e-06	12	27.6557	781	1196.96	0.00989329	96	262.763	989	1594.03	3.24125e-17	2	37.7856	987	1556.24	3.11296e-08	192	302.438	793	1224.61	5.18197e-06	NA	NA	1086	1930.37	NA	0.117782	0.0169372	0.135566
Bcin01g06880.1	1	25.2346	1085	1792.1	1.36522e-06	2	9.92976	985	1479.8	0.0114756	12	8.98961	781	1188.47	0.722734	96	292.467	989	1499.64	1.8913e-21	2	9.90335	987	1489.73	0.0122508	192	282.347	793	1197.46	0.000105587	NA	NA	1086	1817.34	NA	0.137975	0.00467204	0.133201
Bcin01g06890.1	1	1.47659	1085	756.884	0.27568	2	8.75594	985	637.76	0.0196727	12	14.9449	781	494.746	0.278617	96	103.558	989	653.326	0.285967	2	6.80981	987	646.516	0.0489866	192	128.069	793	509.691	1	NA	NA	1086	758.36	NA	0.119206	0.00783883	0.147421
Bcin01g06900.1	1	7.86025	1085	1913.99	0.00847608	2	4.84262	985	1423.94	0.11478	12	35.3701	781	1102.26	0.000806604	96	476.774	989	1437.22	4.03203e-51	2	8.43484	987	1428.78	0.0236704	192	286.308	793	1137.63	5.97547e-05	NA	NA	1086	1921.85	NA	0.198073	0.00350421	0.118945
Bcin01g06910.1	1	5.44293	1085	1854.96	0.0299867	2	11.5291	985	1445.63	0.00550413	12	35.0304	781	1133.9	0.000906309	96	340.389	989	1514.57	1.09757e-28	2	57.4168	987	1457.16	3.02209e-12	192	276.694	793	1168.93	0.000235961	NA	NA	1086	1860.4	NA	0.150734	0.0254258	0.122528
Bcin01g06930.1	1	81.7492	1085	1872.66	1.01083e-18	2	19.4162	985	1441.75	0.000140915	12	49.0051	781	1141.24	5.88505e-06	96	406.805	989	1465.86	2.47332e-39	2	4.69119	987	1461.17	0.126144	192	251.507	793	1190.24	0.00561533	NA	NA	1086	1954.41	NA	0.171945	0.00198283	0.106305
Bcin01g06930.2	1	76.2975	1085	1842.96	1.48249e-17	2	5.2986	985	1440.6	0.0932232	12	57.6961	781	1149.13	2.05641e-07	96	380.328	989	1462.63	5.14649e-35	2	16.7306	987	1445.9	0.000549259	192	233.777	793	1206.82	0.0361925	NA	NA	1086	1919.26	NA	0.164195	0.00722296	0.100926
Bcin01g06940.1	1	16.4152	1085	1728.41	0.000112221	2	7.87821	985	1501.81	0.029347	12	14.4545	781	1203.93	0.306926	96	210.692	989	1517.72	1.94077e-10	2	8.03102	987	1509.69	0.0283676	192	283.431	793	1218.38	9.06561e-05	NA	NA	1086	1744.83	NA	0.107302	0.00409004	0.144346
Bcin01g06950.1	1	20.7777	1085	1440.65	1.26016e-05	2	38.3119	985	1176.19	1.85209e-08	12	38.1096	781	960.083	0.000313403	96	223.52	989	1217.13	5.13882e-12	2	2.63137	987	1214.5	0.315933	192	177.992	793	998.193	0.860923	NA	NA	1086	1461.43	NA	0.13245	0.00155926	0.105472
Bcin01g06960.1	1	38.9228	1085	1946.98	1.54815e-09	2	22.7335	985	1499.4	2.95276e-05	12	19.008	781	1161.63	0.111533	96	375.763	989	1571.21	2.80065e-34	2	49.0795	987	1522.14	1.50882e-10	192	318.76	793	1180.64	3.50474e-07	NA	NA	1086	1985.9	NA	0.15587	0.0203587	0.132225
Bcin01g06970.1	1	21.5535	1085	1036.55	8.56456e-06	2	6.14628	985	716.894	0.0640369	12	30.6471	781	543.827	0.00385194	96	311.403	989	725.15	2.96827e-24	2	2.10938	987	723.04	0.396816	192	142.42	793	574.474	1	NA	NA	1086	1058.11	NA	0.227033	0.00153788	0.103834
Bcin01g06990.1	1	353.235	1085	2636.68	8.26501e-77	2	19.8429	985	1758.91	0.000115721	12	252.23	781	1200.75	1.89208e-44	96	845.653	989	1791.03	6.37742e-119	2	12.2793	987	1778.75	0.00415222	192	305.924	793	1452.98	2.99075e-06	NA	NA	1086	2989.92	NA	0.219773	0.0031912	0.0795052
Bcin01g07020.1	1	0.144618	1085	813.3	0.747621	2	3.07588	985	690.34	0.254325	12	16.8435	781	513.857	0.185586	96	117.374	989	695.926	0.071292	2	2.51011	987	693.416	0.333362	192	159.64	793	530.7	1	NA	NA	1086	813.444	NA	0.125758	0.00268941	0.171044
Bcin01g07030.1	1	0.260702	1085	1594.08	0.661124	2	7.48922	985	1328.56	0.0348831	12	13.9877	781	1081.65	0.335658	96	233.172	989	1360.91	3.0214e-13	2	24.8637	987	1336.05	1.29191e-05	192	232.921	793	1095.64	0.039383	NA	NA	1086	1594.34	NA	0.125877	0.0134226	0.125742
Bcin01g07040.1	1	72.4096	1085	1132.33	1.00769e-16	2	12.0532	985	862.383	0.00433193	12	17.5687	781	688.551	0.157546	96	252.996	989	879.33	7.0838e-16	2	4.89345	987	874.436	0.11527	192	156.263	793	706.12	1	NA	NA	1086	1204.73	NA	0.172974	0.00334566	0.106838
Bcin01g07050.1	1	11.4922	1085	1890.62	0.00134341	2	8.8055	985	1536.47	0.0192498	12	72.7492	781	1191.53	4.81719e-10	96	340.499	989	1550.12	1.05628e-28	2	4.84661	987	1545.28	0.117664	192	272.191	793	1264.28	0.000431637	NA	NA	1086	1902.11	NA	0.151504	0.00215648	0.121111
Bcin01g07070.1	1	22.9883	1085	1954.19	4.186e-06	2	11.6741	985	1540.08	0.0051561	12	37.4634	781	1260.39	0.000393054	96	352.969	989	1601.22	1.17985e-30	2	49.4579	987	1551.76	1.25769e-10	192	242.235	793	1297.85	0.0154581	NA	NA	1086	1977.17	NA	0.148331	0.0207841	0.101797
Bcin01g07070.2	1	22.4714	1085	2000.24	5.41473e-06	2	28.153	985	1565.73	2.32034e-06	12	41.722	781	1228.75	8.69743e-05	96	371.993	989	1628.25	1.13155e-33	2	34.3652	987	1593.88	1.52693e-07	192	295.261	793	1270.47	1.57015e-05	NA	NA	1086	2022.71	NA	0.153142	0.0141475	0.121553
Bcin01g07080.1	1	11.2529	1085	2539.8	0.00151588	2	160.981	985	1690.21	4.38541e-34	12	204.922	781	1253.43	3.93839e-35	96	670.466	989	1869.33	7.29894e-86	2	18.1397	987	1851.19	0.000288997	192	231.863	793	1458.35	0.0433775	NA	NA	1086	2551.05	NA	0.206956	0.00559927	0.0715703
Bcin01g07090.1	1	5.9796	1085	2534.27	0.0225822	2	197.597	985	1674.2	9.04205e-42	12	216.3	781	1243.89	2.38596e-37	96	656.68	989	1877.59	2.58927e-83	2	5.78418	987	1871.8	0.077439	192	214.01	793	1460.19	0.183852	NA	NA	1086	2540.25	NA	0.205039	0.00180603	0.0668217
Bcin01g07100.1	1	0.000496412	1085	2958.94	0.985302	2	261.656	985	1747.87	4.86915e-55	12	154.514	781	1251.97	2.5202e-25	96	935.081	989	2023.86	3.49696e-136	2	14.3347	987	2009.53	0.00163316	192	341.385	793	1406.49	5.599e-09	NA	NA	1086	2958.94	NA	0.239251	0.0036677	0.0873475
Bcin01g07110.1	1	27.5128	1085	2337.19	4.39967e-07	2	129.584	985	1594.72	1.70757e-27	12	166.955	781	1165.61	9.62777e-28	96	574.352	989	1762.84	2.68159e-68	2	38.5306	987	1724.31	2.18846e-08	192	262.153	793	1332.57	0.00158089	NA	NA	1086	2364.7	NA	0.192892	0.0129402	0.0880423
Bcin01g07120.1	1	5.78494	1085	2148.88	0.0249944	2	27.5529	985	1498.91	3.08427e-06	12	58.1156	781	1153.27	1.7381e-07	96	586.223	989	1562.66	1.95453e-70	2	36.194	987	1526.47	6.5171e-08	192	287.526	793	1211.39	4.97115e-05	NA	NA	1086	2154.67	NA	0.211093	0.0130331	0.103535
Bcin01g07170.1	1	0.0121068	1085	1596.7	0.92745	2	24.7529	985	1353.82	1.15141e-05	12	52.9067	781	1094.89	1.32932e-06	96	214.161	989	1382.53	7.36832e-11	2	3.95692	987	1378.58	0.174764	192	206.028	793	1147.8	0.303126	NA	NA	1086	1596.71	NA	0.118006	0.00218033	0.113525
Bcin01g07170.2	1	0.304201	1085	1698.71	0.634575	2	36.7944	985	1417.23	3.82792e-08	12	44.6701	781	1166.15	2.97772e-05	96	235.247	989	1463.46	1.62722e-13	2	9.44024	987	1454.02	0.0150442	192	206.404	793	1210.82	0.296681	NA	NA	1086	1699.01	NA	0.121031	0.00485684	0.106191
Bcin01g07180.1	1	104.56	1085	1715.01	1.30863e-23	2	16.735	985	1453.88	0.000492277	12	10.3946	781	1150.88	0.607156	96	235.863	989	1479.15	1.35287e-13	2	8.53039	987	1470.62	0.0226641	192	292.607	793	1161.28	2.36178e-05	NA	NA	1086	1819.57	NA	0.114277	0.00413302	0.141769
Bcin01g07190.1	1	9.87334	1085	885.784	0.0030419	2	2.81193	985	746.714	0.286696	12	28.1604	781	540.337	0.00846912	96	129.377	989	756.406	0.0141015	2	6.88037	987	749.526	0.0474998	192	178.217	793	568.498	0.857398	NA	NA	1086	895.657	NA	0.125376	0.00666758	0.172705
Bcin01g07200.1	1	0.284801	1085	1128.22	0.645661	2	16.9899	985	871.202	0.000437564	12	20.9251	781	668.524	0.0683273	96	238.078	989	890.143	6.95081e-14	2	1.95107	987	888.192	0.425529	192	181.753	793	689.449	0.796284	NA	NA	1086	1128.51	NA	0.173966	0.00142566	0.132809
Bcin01g07210.1	1	19.4752	1085	1902.99	2.41616e-05	2	9.59857	985	1118.32	0.0133717	12	14.7165	781	793.842	0.291928	96	684.092	989	1218.89	2.1799e-88	2	90.972	987	1127.92	3.81032e-19	192	309.764	793	808.559	1.5904e-06	NA	NA	1086	1922.46	NA	0.2536	0.0337242	0.114833
Bcin01g07220.1	1	1.62313	1085	1087.65	0.2517	2	1.84738	985	912.655	0.442577	12	18.2891	781	702.422	0.132899	96	162.203	989	925.443	3.32055e-05	2	10.9412	987	914.502	0.00767673	192	191.943	793	720.711	0.589641	NA	NA	1086	1089.27	NA	0.128486	0.00866686	0.152045
Bcin01g07230.1	1	9.38692	1085	1370.85	0.00389652	2	8.72207	985	1109.09	0.019975	12	49.8582	781	855.487	4.25274e-06	96	242.609	989	1128.24	1.7593e-14	2	10.4365	987	1117.81	0.00962091	192	203.741	793	905.345	0.34448	NA	NA	1086	1380.24	NA	0.148541	0.0063899	0.124743
Bcin01g07240.1	1	8.11635	1085	1884.03	0.00742649	2	9.29591	985	1475.19	0.0153763	12	41.5918	781	1165.7	9.11668e-05	96	371.496	989	1512.53	1.3582e-33	2	28.0494	987	1484.48	2.92261e-06	192	267.897	793	1207.29	0.000758898	NA	NA	1086	1892.14	NA	0.162106	0.0122396	0.116899
Bcin01g07260.1	1	6.11768	1085	1233.32	0.0209994	2	5.54595	985	1114.24	0.0835652	12	35.9074	781	886.024	0.000672011	96	113.51	989	1119.81	0.110879	2	0.0272795	987	1119.78	0.988476	192	192.305	793	921.932	0.582165	NA	NA	1086	1239.44	NA	0.0838966	2.01626e-05	0.142135
Bcin01g07270.1	1	29.1105	1085	1008.52	1.99463e-07	2	13.9693	985	830.045	0.00178064	12	22.3681	781	601.724	0.0463109	96	162.922	989	845.601	2.84346e-05	2	1.58715	987	844.014	0.498511	192	205.953	793	624.092	0.304383	NA	NA	1086	1037.63	NA	0.135526	0.00132027	0.171321
Bcin01g07280.1	1	7.59001	1085	1605.82	0.00973735	2	12.7049	985	1388.44	0.00320687	12	25.3403	781	1157.36	0.0199171	96	204.623	989	1401.2	1.02668e-09	2	0.0552392	987	1401.15	0.976862	192	205.738	793	1182.7	0.308105	NA	NA	1086	1613.41	NA	0.112548	3.03831e-05	0.113161
Bcin01g07290.1	1	0.169729	1085	1812.8	0.726273	2	8.92846	985	1517.87	0.0182006	12	54.6052	781	1179.79	6.88297e-07	96	261.614	989	1551.18	4.68197e-17	2	24.3847	987	1526.8	1.60676e-05	192	283.477	793	1234.39	9.00382e-05	NA	NA	1086	1812.97	NA	0.124639	0.0116175	0.135055
Bcin01g07300.1	1	0.32185	1085	1973.36	0.624809	2	3.46466	985	1533.67	0.213506	12	54.8529	781	1191.4	6.26698e-07	96	312.744	989	1660.62	1.86793e-24	2	123.482	987	1537.13	6.82032e-26	192	287.421	793	1246.25	5.05238e-05	NA	NA	1086	1973.68	NA	0.129774	0.0512393	0.119266
Bcin01g07320.1	1	42.7603	1085	2229.58	2.32104e-10	2	1.411	985	1541.4	0.535695	12	131.205	781	1148.44	7.36129e-21	96	662.95	989	1566.63	1.80023e-84	2	23.819	987	1542.81	2.08986e-05	192	261.756	793	1279.64	0.00165816	NA	NA	1086	2272.34	NA	0.224037	0.0080494	0.0884577
Bcin01g07330.1	1	42.4524	1085	2008.35	2.69713e-10	2	30.1181	985	1277.76	9.21272e-07	12	33.6082	781	1010.43	0.00146107	96	677.486	989	1330.86	3.66674e-87	2	22.9856	987	1307.88	3.06166e-05	192	233.721	793	1044.04	0.0363909	NA	NA	1086	2050.8	NA	0.246245	0.00835453	0.0849501
Bcin01g07340.1	1	64.1408	1085	2649.77	5.89928e-15	2	41.4475	985	1543.97	4.17061e-09	12	150.879	781	1158.63	1.22935e-24	96	1039.98	989	1609.79	1.14583e-156	2	24.3739	987	1585.42	1.61436e-05	192	234.459	793	1309.51	0.0338428	NA	NA	1086	2713.91	NA	0.275253	0.00645107	0.0620547
Bcin01g07350.1	1	92.3178	1085	2279.02	5.52224e-21	2	182.87	985	1420.06	1.1322e-38	12	73.8023	781	1073.78	3.1461e-10	96	656.343	989	1622.68	2.98457e-83	2	19.7553	987	1602.93	0.000137914	192	272.475	793	1147.58	0.000416776	NA	NA	1086	2371.34	NA	0.215375	0.00648258	0.0894112
Bcin01g07380.1	1	29.2933	1085	2432.07	1.82194e-07	2	202.885	985	1568.28	7.24189e-43	12	147.575	781	1144.4	5.24995e-24	96	612.962	989	1819.11	2.6903e-75	2	47.9469	987	1771.17	2.58007e-10	192	276.307	793	1291.97	0.000248136	NA	NA	1086	2461.37	NA	0.196319	0.0153564	0.0884953
Bcin01g07390.1	1	44.8637	1085	2158.45	8.13395e-11	2	9.21828	985	1542.88	0.015927	12	41.8541	781	1241.12	8.29361e-05	96	578.544	989	1579.9	4.70775e-69	2	27.8023	987	1552.1	3.279e-06	192	259.904	793	1282.98	0.0020775	NA	NA	1086	2203.31	NA	0.205913	0.00989526	0.0925038
Bcin01g07400.1	1	4.50041	1085	2152.74	0.0496535	2	7.61784	985	1636.3	0.0329406	12	150.555	781	1202.7	1.40559e-24	96	498.881	989	1653.86	6.02662e-55	2	9.94591	987	1643.91	0.0120131	192	283.038	793	1353.26	9.61374e-05	NA	NA	1086	2157.24	NA	0.187122	0.00373055	0.106163
Bcin01g07410.1	1	132.372	1085	2334.78	1.52939e-29	2	118.35	985	1574.3	3.8085e-25	12	130.59	781	1167.86	9.65096e-21	96	614.381	989	1720.4	1.48461e-75	2	27.7432	987	1692.65	3.36696e-06	192	275.858	793	1298.45	0.000263463	NA	NA	1086	2467.15	NA	0.197596	0.00892272	0.0887209
Bcin01g07410.2	1	150.78	1085	2403.52	1.7564e-33	2	117.788	985	1566.25	4.96312e-25	12	161.128	781	1156.12	1.28776e-26	96	690.731	989	1712.79	1.26392e-89	2	28.7537	987	1684.04	2.10997e-06	192	249.006	793	1317.24	0.00748998	NA	NA	1086	2554.3	NA	0.210988	0.008783	0.0760607
Bcin01g07420.1	1	0.245497	1085	1994.54	0.67147	2	16.4051	985	1581.72	0.000575026	12	35.5259	781	1189.07	0.000765058	96	374.799	989	1619.74	3.99839e-34	2	21.6132	987	1598.13	5.81051e-05	192	357.132	793	1224.59	2.41931e-10	NA	NA	1086	1994.79	NA	0.156741	0.00903864	0.149352
Bcin01g07440.1	1	43.4197	1085	1969.27	1.67113e-10	2	4.21176	985	1578.72	0.152836	12	116.964	781	1204.14	3.73608e-18	96	355.331	989	1613.94	5.01646e-31	2	31.0171	987	1582.93	7.34248e-07	192	257.608	793	1321.11	0.00273736	NA	NA	1086	2012.69	NA	0.148114	0.012929	0.107379
Bcin01g07450.1	1	1.12871	1085	1843.91	0.345066	2	10.61	985	1568.35	0.00839591	12	30.4173	781	1224.97	0.00414448	96	252.827	989	1591.08	7.46648e-16	2	12.1262	987	1578.96	0.00446666	192	312.958	793	1255.39	9.44958e-07	NA	NA	1086	1845.04	NA	0.119824	0.00574704	0.148322
Bcin01g07460.1	1	27.912	1085	1875.33	3.61675e-07	2	2.5107	985	1422.28	0.328538	12	13.8455	781	1193.46	0.344774	96	388.363	989	1486.97	2.55842e-36	2	62.1789	987	1424.79	3.19746e-13	192	214.98	793	1207.3	0.171647	NA	NA	1086	1903.25	NA	0.164995	0.0264165	0.0913338
Bcin01g07480.1	1	32.5716	1085	1667.39	3.60931e-08	2	22.5449	985	1439.58	3.22532e-05	12	22.9718	781	1141.9	0.0392145	96	203.543	989	1463.85	1.37341e-09	2	1.72287	987	1462.13	0.469765	192	274.714	793	1164.87	0.000306903	NA	NA	1086	1699.96	NA	0.106834	0.000904284	0.144189
Bcin01g07490.1	1	33.3298	1085	1828.99	2.48155e-08	2	19.2346	985	1463.03	0.000153803	12	32.3433	781	1149.75	0.00222607	96	309.628	989	1519.36	5.46968e-24	2	37.1033	987	1482.26	4.29321e-08	192	280.935	793	1182.09	0.000128901	NA	NA	1086	1862.32	NA	0.140163	0.016796	0.127174
Bcin01g07510.1	1	166.74	1085	2086.72	6.65262e-37	2	26.7287	985	1531.33	4.52996e-06	12	52.3649	781	1201.48	1.63509e-06	96	499.851	989	1586.87	4.0793e-55	2	28.8044	987	1558.06	2.0604e-06	192	277.489	793	1253.85	0.000211032	NA	NA	1086	2253.46	NA	0.179666	0.0103534	0.0997402
Bcin01g07520.1	1	1.842	1085	2009.17	0.220359	2	5.48594	985	1640.09	0.0858138	12	103.218	781	1271.69	1.37999e-15	96	359.771	989	1649.4	9.96946e-32	2	3.81764	987	1645.58	0.185774	192	265.179	793	1374.91	0.0010856	NA	NA	1086	2011.01	NA	0.151508	0.0016077	0.111673
Bcin01g07520.2	1	12.6122	1085	1945.24	0.000762523	2	2.26729	985	1544.67	0.366731	12	89.0315	781	1214.23	5.64997e-13	96	395.311	989	1549.92	1.89671e-37	2	2.98443	987	1546.94	0.269976	192	241.413	793	1303.26	0.0168615	NA	NA	1086	1957.85	NA	0.167779	0.00126666	0.102461
Bcin01g07530.1	1	472.073	1085	2390.18	3.50957e-102	2	92.1817	985	1631.83	1.11593e-19	12	187.963	781	1192.82	8.32024e-32	96	658.686	989	1731.49	1.10737e-83	2	7.48263	987	1724.01	0.0362005	192	251.043	793	1380.79	0.00591927	NA	NA	1086	2862.25	NA	0.18668	0.00212067	0.071149
Bcin01g07540.1	1	0.28724	1085	1782.13	0.644475	2	1.05709	985	1546.49	0.625722	12	13.7311	781	1221.07	0.352409	96	220.748	989	1561.38	1.13957e-11	2	13.8373	987	1547.54	0.00204254	192	311.685	793	1234.8	1.17553e-06	NA	NA	1086	1782.42	NA	0.109444	0.00686035	0.154529
Bcin01g07550.1	1	4.62191	1085	1816.91	0.0464381	2	6.90602	985	1457.63	0.0453947	12	21.7526	781	1198.4	0.0547474	96	301.322	989	1515.58	9.40939e-23	2	51.0447	987	1464.54	5.91919e-11	192	237.485	793	1220.15	0.0251709	NA	NA	1086	1821.53	NA	0.138609	0.0234807	0.109244
Bcin01g07570.1	1	3.38903	1085	1241.35	0.0910798	2	9.28883	985	879.204	0.0154201	12	33.0461	781	677.614	0.00176085	96	341.258	989	900.091	8.04452e-29	2	11.5974	987	888.493	0.00569379	192	168.544	793	710.66	0.97547	NA	NA	1086	1244.74	NA	0.213608	0.00725929	0.105499
Bcin01g07580.1	1	7.41324	1085	1775.68	0.0106595	2	2.16594	985	1420.24	0.383396	12	33.9517	781	1144.47	0.00130627	96	352.249	989	1423.43	1.53195e-30	2	1.0285	987	1422.4	0.637134	192	241.82	793	1178.42	0.0161603	NA	NA	1086	1783.09	NA	0.164882	0.000481426	0.113192
Bcin01g07590.1	1	110.854	1085	1955.7	5.99833e-25	2	11.1939	985	1470.27	0.00642709	12	44.057	781	1183.42	3.72903e-05	96	438	989	1517.7	1.59235e-44	2	36.2362	987	1481.46	6.39729e-08	192	242.788	793	1227.48	0.0145764	NA	NA	1086	2066.55	NA	0.172387	0.0142618	0.0955562
Bcin01g07600.1	1	27.7115	1085	2066.34	3.98727e-07	2	39.5133	985	1579.65	1.04577e-08	12	83.7898	781	1256.84	5.09638e-12	96	365.409	989	1700.93	1.26941e-32	2	81.7651	987	1619.16	3.06739e-17	192	239.024	793	1340.63	0.0216011	NA	NA	1086	2094.05	NA	0.143793	0.0321755	0.0940587
Bcin01g07610.1	1	16.8499	1085	2108.28	9.01787e-05	2	17.669	985	1626.37	0.000319542	12	106.615	781	1247.25	3.25344e-16	96	433.174	989	1675.1	1.02879e-43	2	31.0643	987	1644.04	7.18662e-07	192	272.503	793	1353.86	0.000415081	NA	NA	1086	2125.13	NA	0.16729	0.0119969	0.105239
Bcin01g07620.1	1	27.6409	1085	1904.59	4.13168e-07	2	63.7549	985	1525.44	9.54765e-14	12	38.1699	781	1239.44	0.000306931	96	278.857	989	1625.73	1.75688e-19	2	36.5367	987	1589.19	5.58176e-08	192	247.826	793	1277.61	0.00854863	NA	NA	1086	1932.23	NA	0.124068	0.0162557	0.110261
Bcin01g07630.1	1	1.4302	1085	987.486	0.28375	2	23.2479	985	822.01	2.32342e-05	12	32.1679	781	628.784	0.00235956	96	134.478	989	853.009	0.00636618	2	7.75102	987	845.258	0.0321726	192	161.058	793	660.952	1	NA	NA	1086	988.917	NA	0.118886	0.00685236	0.142385
Bcin01g07640.1	1	2.00513	1085	2895.68	0.199894	2	73.3981	985	1437.36	9.55716e-16	12	126	781	1074.29	7.20509e-20	96	1360.38	989	1535.3	2.16201e-220	2	24.5443	987	1510.75	1.49198e-05	192	237.064	793	1200.29	0.0262296	NA	NA	1086	2897.68	NA	0.317652	0.00573116	0.0553551
Bcin01g07650.1	1	110.58	1085	2118.32	6.83809e-25	2	24.6434	985	1555.95	1.20982e-05	12	75.8319	781	1222.38	1.37717e-10	96	521.252	989	1597.06	7.38996e-59	2	16.4736	987	1580.59	0.000615977	192	257.734	793	1298.21	0.00269627	NA	NA	1086	2228.9	NA	0.188407	0.00595441	0.0931585
Bcin01g07650.2	1	109.383	1085	2063.93	1.22846e-24	2	27.5227	985	1510.99	3.12823e-06	12	77.9847	781	1220.85	5.58498e-11	96	501.475	989	1562.46	2.13475e-55	2	23.9401	987	1538.52	1.97499e-05	192	212.164	793	1298.83	0.208261	NA	NA	1086	2173.32	NA	0.185819	0.00887089	0.0786161
Bcin01g07660.1	1	17.6176	1085	1211.33	6.12596e-05	2	2.41101	985	1034.25	0.343622	12	27.3562	781	825.572	0.0108565	96	167.07	989	1044.26	1.14561e-05	2	7.59365	987	1036.66	0.034461	192	181.324	793	852.928	0.803958	NA	NA	1086	1228.94	NA	0.119029	0.00541009	0.129184
Bcin01g07670.1	1	0.274452	1085	1927.49	0.652205	2	37.6961	985	1496.78	2.47762e-08	12	50.0946	781	1201.67	3.89019e-06	96	353.1	989	1574.39	1.12516e-30	2	39.9052	987	1534.48	1.14326e-08	192	245.016	793	1251.77	0.0115717	NA	NA	1086	1927.76	NA	0.152148	0.0171949	0.105576
Bcin01g07670.2	1	0.593417	1085	1892.62	0.501614	2	37.2352	985	1487.36	3.09433e-08	12	52.6797	781	1215.53	1.44856e-06	96	348.798	989	1543.82	5.32809e-30	2	19.2266	987	1524.59	0.000175829	192	219.145	793	1268.21	0.126661	NA	NA	1086	1893.21	NA	0.154251	0.00850268	0.0969139
Bcin01g07680.1	1	0.162585	1085	1221.04	0.732216	2	2.56256	985	1113.02	0.321166	12	11.0918	781	922.152	0.549537	96	101.639	989	1119.4	0.332249	2	3.81299	987	1115.59	0.186156	192	179.781	793	933.243	0.830954	NA	NA	1086	1221.2	NA	0.076613	0.00287415	0.135515
Bcin01g07690.1	1	14.5273	1085	1957.37	0.000291015	2	41.8229	985	1517.84	3.47717e-09	12	34.9128	781	1239.95	0.000943844	96	390.867	989	1566.5	1.0032e-36	2	6.8407	987	1559.66	0.0483126	192	242.975	793	1274.87	0.0142892	NA	NA	1086	1971.9	NA	0.16495	0.00288685	0.102538
Bcin01g07700.1	1	24.1895	1085	1848.86	2.29487e-06	2	10.7436	985	1566.92	0.00789524	12	93.4511	781	1222.53	8.76636e-14	96	267.08	989	1581.78	8.13775e-18	2	4.12152	987	1577.66	0.162437	192	250.932	793	1315.99	0.00599948	NA	NA	1086	1873.05	NA	0.124556	0.00192212	0.117025
Bcin01g07710.1	1	33.901	1085	2229.72	1.87392e-08	2	10.2823	985	1648.01	0.00976283	12	225.188	781	1184.27	4.40089e-39	96	518.721	989	1711	2.05892e-58	2	52.7111	987	1658.29	2.718e-11	192	238.55	793	1409.46	0.0225996	NA	NA	1086	2263.63	NA	0.182967	0.0185926	0.0841431
Bcin01g07720.1	1	50.9902	1085	2288.77	3.91731e-12	2	21.8508	985	1520.17	4.48266e-05	12	97.6405	781	1170.97	1.48007e-14	96	621.59	989	1667.18	7.16597e-77	2	125.16	987	1542.02	3.04969e-26	192	251.557	793	1268.61	0.00558673	NA	NA	1086	2339.76	NA	0.201389	0.0405507	0.0815021
Bcin01g07720.2	1	4.37252	1085	2119.51	0.0530475	2	65.4213	985	1537.56	4.32392e-14	12	95.5681	781	1179.32	3.57582e-14	96	488.485	989	1631.03	3.82805e-53	2	28.0456	987	1602.98	2.92707e-06	192	262.669	793	1274.89	0.0014817	NA	NA	1086	2123.88	NA	0.185003	0.0106217	0.0994803
Bcin01g07730.1	1	19.8265	1085	1802.55	2.02435e-05	2	5.7041	985	1466.47	0.0779644	12	14.5763	781	1224.16	0.299895	96	217.312	989	1585.24	3.02872e-11	2	113.067	987	1472.18	9.86319e-24	192	227.735	793	1238.74	0.062814	NA	NA	1086	1822.38	NA	0.100946	0.0525217	0.105787
Bcin01g07740.1	1	0.138536	1085	1753.58	0.753055	2	7.30142	985	1427.82	0.0380331	12	5.38175	781	1155.64	0.947059	96	275.653	989	1477.93	5.02363e-19	2	42.8126	987	1435.12	2.9089e-09	192	266.794	793	1161.02	0.000877355	NA	NA	1086	1753.72	NA	0.133025	0.0206606	0.12875
Bcin01g07750.1	1	40.014	1085	1538.28	9.04876e-10	2	21.2465	985	1164.2	5.96318e-05	12	21.1341	781	931.481	0.0646284	96	318.298	989	1219.98	2.70559e-25	2	34.5327	987	1185.45	1.41439e-07	192	211.584	793	952.615	0.216516	NA	NA	1086	1578.29	NA	0.164825	0.0178822	0.109565
Bcin01g07760.1	1	156.28	1085	3409.47	1.16089e-34	2	325.145	985	1665.87	3.29824e-68	12	178.731	781	1152.06	5.18971e-30	96	1378.58	989	2030.9	4.81339e-224	2	39.8847	987	1991.01	1.1531e-08	192	335.075	793	1330.79	1.88953e-08	NA	NA	1086	3565.75	NA	0.276588	0.0080022	0.0672273
Bcin01g07770.1	1	8.6475	1085	1946.85	0.00565062	2	29.8805	985	1583.41	1.02967e-06	12	85.64	781	1235.79	2.36626e-12	96	281.556	989	1665.3	7.23978e-20	2	52.0104	987	1613.29	3.77491e-11	192	261.981	793	1321.43	0.00161323	NA	NA	1086	1955.5	NA	0.123	0.0227212	0.114449
Bcin01g07780.1	1	11.3427	1085	1810.47	0.00144875	2	18.8857	985	1553.43	0.000181052	12	38.2995	781	1266.58	0.000293364	96	235.22	989	1575.25	1.64056e-13	2	2.93138	987	1572.32	0.276269	192	248.555	793	1304.88	0.00787935	NA	NA	1086	1821.81	NA	0.114187	0.00142303	0.12066
Bcin01g07800.1	1	1.43463	1085	1689.12	0.282942	2	3.94151	985	1489.42	0.17266	12	20.8926	781	1236.24	0.0688747	96	184.935	989	1504.18	1.70366e-07	2	10.8149	987	1493.37	0.00813208	192	232.288	793	1257.14	0.0417713	NA	NA	1086	1690.55	NA	0.098041	0.00573341	0.123145
Bcin01g07810.1	1	10.5906	1085	2401.7	0.00211649	2	108.393	985	1678.82	4.57506e-23	12	148.537	781	1227.68	3.42861e-24	96	580.225	989	1821.48	2.35395e-69	2	34.2636	987	1787.21	1.59892e-07	192	302.602	793	1376.22	5.03962e-06	NA	NA	1086	2412.29	NA	0.191697	0.0113201	0.0999749
Bcin01g07820.1	1	29.0588	1085	1827.54	2.04536e-07	2	5.10717	985	1447.78	0.101806	12	64.5115	781	1141.74	1.36232e-08	96	253.88	989	1573.66	5.36996e-16	2	120.776	987	1452.89	2.52942e-25	192	241.525	793	1206.25	0.0166724	NA	NA	1086	1856.6	NA	0.113783	0.0541293	0.108246
Bcin01g07830.1	1	4.02918	1085	1786.37	0.0639029	2	1.83458	985	1535.17	0.444885	12	15.9084	781	1227.73	0.227464	96	235.409	989	1550.97	1.55089e-13	2	13.957	987	1537.01	0.00193731	192	291.535	793	1243.64	2.76978e-05	NA	NA	1086	1790.4	NA	0.115409	0.00684242	0.142925
Bcin01g07830.2	1	1.96433	1085	1818.37	0.20471	2	3.14563	985	1559.43	0.246457	12	11.4889	781	1236.02	0.516945	96	241.227	989	1577.14	2.68103e-14	2	14.5637	987	1562.57	0.00147424	192	311.92	793	1247.51	1.12875e-06	NA	NA	1086	1820.33	NA	0.116191	0.00701489	0.150242
Bcin01g07840.1	1	15.6502	1085	1454.65	0.000164876	2	4.31826	985	1238.74	0.145678	12	26.2879	781	1022.23	0.0150205	96	209.339	989	1245.32	2.82557e-10	2	2.25759	987	1243.06	0.372808	192	190.218	793	1048.52	0.626758	NA	NA	1086	1470.3	NA	0.124466	0.00134228	0.113097
Bcin01g07860.1	1	0.0101651	1085	2063.34	0.933058	2	50.2647	985	1600.28	6.189e-11	12	91.9945	781	1241.49	1.60987e-13	96	376.376	989	1686.97	2.2329e-34	2	36.4216	987	1650.54	5.88194e-08	192	266.795	793	1333.49	0.000877355	NA	NA	1086	2063.35	NA	0.152001	0.014709	0.107746
Bcin01g07870.1	1	179.89	1085	2523.25	1.04516e-39	2	207.355	985	1487.26	8.64578e-44	12	56.2958	781	1163.13	3.56947e-07	96	568.265	989	1954.99	3.32197e-67	2	260.375	987	1694.61	1.67456e-54	192	267.833	793	1219.42	0.000765036	NA	NA	1086	2703.14	NA	0.1609	0.0737234	0.0758352	hypothetical protein BofuT4_P048690.1	no GO terms
Bcin01g07880.1	1	321.788	1085	2198.17	4.46021e-70	2	133.847	985	1508.43	2.18049e-28	12	105.881	781	1167.32	4.39028e-16	96	490.094	989	1708.07	2.015e-53	2	65.7955	987	1642.28	5.6832e-14	192	235.226	793	1273.2	0.0313772	NA	NA	1086	2519.95	NA	0.159337	0.0213911	0.0764753
Bcin01g07880.2	1	293.104	1085	2152.26	6.19408e-64	2	146.445	985	1484.26	4.96934e-31	12	113.353	781	1163.05	1.7781e-17	96	467.628	989	1684.63	1.50643e-49	2	53.928	987	1630.7	1.53427e-11	192	207.851	793	1276.41	0.27253	NA	NA	1086	2445.36	NA	0.157614	0.0181764	0.0700563
Bcin01g07890.1	1	60.4164	1085	1689.6	3.72389e-14	2	4.20536	985	1447.74	0.153264	12	27.5461	781	1190.69	0.0102445	96	223.392	989	1466.21	5.33192e-12	2	14.2564	987	1451.95	0.00169217	192	229.503	793	1218.24	0.0537828	NA	NA	1086	1750.01	NA	0.112389	0.00717245	0.115464
Bcin01g07910.1	1	12.292	1085	1874.35	0.000895554	2	8.25315	985	1398.3	0.0247775	12	21.0762	781	1156.01	0.0656541	96	467.756	989	1406.59	1.43232e-49	2	0.0412073	987	1406.55	0.982677	192	221.217	793	1177.08	0.108013	NA	NA	1086	1886.64	NA	0.19867	1.7502e-05	0.0939573
Bcin01g07910.2	1	7.52549	1085	1858.34	0.0100508	2	21.2544	985	1381.16	5.94604e-05	12	24.1485	781	1092.25	0.0281862	96	455.787	989	1402.56	1.56254e-47	2	0.138988	987	1402.42	0.94166	192	264.765	793	1116.4	0.00114122	NA	NA	1086	1865.87	NA	0.196308	5.98623e-05	0.114035
Bcin01g07920.1	1	1.55141	1085	2457.3	0.26326	2	150.107	985	1622.22	8.6368e-32	12	139.241	781	1203.5	2.12685e-22	96	597.283	989	1860.02	1.92978e-72	2	87.6922	987	1772.32	1.84779e-18	192	279.472	793	1342.74	0.000159033	NA	NA	1086	2458.85	NA	0.189986	0.0278935	0.0888955
Bcin01g07930.1	1	11.2729	1085	2220.02	0.0015017	2	104.535	985	1516	2.9119e-22	12	110.124	781	1174.28	7.2313e-17	96	375.902	989	1844.12	2.65991e-34	2	223.583	987	1620.54	7.91979e-47	192	231.595	793	1284.41	0.0444976	NA	NA	1086	2231.3	NA	0.132791	0.0789829	0.0818131	hypothetical protein BC1G_00142	no GO terms
Bcin01g07960.1	1	10.7811	1085	2121.74	0.0019256	2	4.96231	985	1623.79	0.108718	12	115.058	781	1239.71	8.52158e-18	96	452.634	989	1669.11	5.3374e-47	2	40.3528	987	1628.75	9.28288e-09	192	269.023	793	1354.77	0.000655929	NA	NA	1086	2132.52	NA	0.172399	0.0153695	0.102465
Bcin01g07970.1	1	1.96524	1085	2068.36	0.204615	2	4.84864	985	1614.57	0.114483	12	85.127	781	1209.91	2.91567e-12	96	407.421	989	1660.94	1.95999e-39	2	41.5143	987	1619.42	5.37088e-09	192	319.541	793	1295.03	3.07312e-07	NA	NA	1086	2070.32	NA	0.161722	0.0164788	0.126839
Bcin01g07990.1	1	244.699	1085	2107.36	1.38056e-53	2	68.923	985	1564.11	8.12775e-15	12	75.5019	781	1244.48	1.57555e-10	96	441.414	989	1665.95	4.20595e-45	2	32.9145	987	1633.03	3.01986e-07	192	244.129	793	1319.98	0.0127057	NA	NA	1086	2352.06	NA	0.156176	0.0116454	0.0863751
Bcin01g08000.1	1	33.3715	1085	1880.85	2.43308e-08	2	40.0499	985	1453.51	8.10446e-09	12	47.1785	781	1142.52	1.17336e-05	96	372.065	989	1508.78	1.10207e-33	2	15.2191	987	1493.56	0.00109417	192	263.815	793	1189.7	0.00129257	NA	NA	1086	1914.22	NA	0.161662	0.00661268	0.114628
Bcin01g08010.1	1	40.224	1085	1742.26	8.16125e-10	2	16.2942	985	1412.87	0.000605629	12	19.3271	781	1144.46	0.102873	96	266.454	989	1475.81	9.94792e-18	2	46.6429	987	1429.17	4.80725e-10	192	249.086	793	1163.78	0.00741978	NA	NA	1086	1782.49	NA	0.12715	0.0222577	0.118862
Bcin01g08020.1	1	20.3503	1085	1790.8	1.559e-05	2	12.072	985	1458.19	0.00429544	12	12.3525	781	1175.57	0.450141	96	301.051	989	1489.75	1.03229e-22	2	19.4858	987	1470.26	0.000155674	192	270.268	793	1187.92	0.00055463	NA	NA	1086	1811.15	NA	0.141227	0.009141	0.126786
Bcin01g08030.1	1	21.6162	1085	1819.07	8.30223e-06	2	2.66284	985	1544.75	0.306681	12	23.6817	781	1255.64	0.0321615	96	270.463	989	1548.61	2.72685e-18	2	1.19753	987	1547.41	0.591337	192	265.42	793	1279.33	0.00105079	NA	NA	1086	1840.69	NA	0.128039	0.000566919	0.125652
Bcin01g08040.1	1	19.9303	1085	1956.2	1.92183e-05	2	16.2422	985	1444.52	0.000620338	12	56.7934	781	1158.32	2.93327e-07	96	437.491	989	1518.71	1.9376e-44	2	57.948	987	1460.76	2.36234e-12	192	229.405	793	1215.11	0.0542311	NA	NA	1086	1976.13	NA	0.177009	0.0234458	0.0928177
Bcin01g08050.1	1	106.042	1085	2075.12	6.30354e-24	2	68.1682	985	1512.18	1.16193e-14	12	113.405	781	1137.73	1.74159e-17	96	494.13	989	1580.99	4.03226e-54	2	0.645845	987	1580.34	0.755014	192	261.044	793	1251.13	0.00180907	NA	NA	1086	2181.16	NA	0.184657	0.000241353	0.0975523
Bcin01g08070.1	1	13.1793	1085	1420.46	0.000572909	2	6.6521	985	1286.68	0.0509653	12	16.0172	781	1093.8	0.221959	96	122.306	989	1298.16	0.0382826	2	4.83046	987	1293.33	0.118448	192	176.858	793	1109.82	0.877211	NA	NA	1086	1433.64	NA	0.0783619	0.0030949	0.113314
Bcin01g08080.1	1	78.9742	1085	2073.75	3.96613e-18	2	13.4341	985	1421.84	0.00228209	12	31.7327	781	1132.16	0.00271898	96	635.896	989	1437.85	1.73239e-79	2	2.57441	987	1435.28	0.323869	192	257.948	793	1163.89	0.00263255	NA	NA	1086	2152.72	NA	0.227822	0.000922332	0.0924152
Bcin01g08080.2	1	61.8421	1085	2132.11	1.84066e-14	2	18.98	985	1439.36	0.000173354	12	44.999	781	1101.59	2.63801e-05	96	663.402	989	1468.71	1.48527e-84	2	10.3677	987	1458.34	0.00992947	192	292.774	793	1146.59	2.30517e-05	NA	NA	1086	2193.95	NA	0.231334	0.0036153	0.102093
Bcin01g08100.1	1	21.694	1085	1928.48	7.99166e-06	2	11.1107	985	1412.37	0.00668115	12	38.9631	781	1142.2	0.000232843	96	464.988	989	1463.49	4.25018e-49	2	40.0037	987	1423.48	1.09143e-08	192	231.214	793	1181.16	0.0460641	NA	NA	1086	1950.17	NA	0.189392	0.0162937	0.0941746
Bcin01g08110.1	1	0.0086807	1085	850.735	0.938301	2	2.66437	985	687.008	0.306486	12	10.735	781	533.454	0.578881	96	158.536	989	692.199	7.21237e-05	2	2.52641	987	689.672	0.330988	192	142.82	793	544.188	1	NA	NA	1086	850.743	NA	0.156686	0.00249693	0.141153
Bcin01g08150.1	1	183.027	1085	2193.32	2.22727e-40	2	104.832	985	1032.23	2.5454e-22	12	73.1048	781	753.091	4.16669e-10	96	1032.06	989	1161.26	4.07882e-155	2	24.1962	987	1137.06	1.75122e-05	192	206.032	793	826.196	0.303089	NA	NA	1086	2376.34	NA	0.300664	0.00704894	0.0600223
Bcin01g08160.1	1	196.73	1085	1896.33	2.61748e-43	2	174.709	985	822.335	5.95527e-37	12	35.8906	781	557.971	0.000675908	96	848.837	989	1047.5	1.55591e-119	2	50.4532	987	997.044	7.85295e-11	192	228.474	793	593.861	0.0588799	NA	NA	1086	2093.06	NA	0.283669	0.0168607	0.0763525
Bcin01g08170.1	1	1.63355	1085	1060.36	0.25021	2	7.06097	985	934.025	0.0424103	12	16.8339	781	764.444	0.185912	96	108.797	989	951.568	0.1798	2	10.4818	987	941.086	0.00944182	192	152.747	793	781.278	1	NA	NA	1086	1062	NA	0.0921008	0.00887327	0.129307
Bcin01g08170.2	1	1.92606	1085	1039.94	0.209483	2	16.4917	985	914.096	0.000551671	12	9.72939	781	745.018	0.662006	96	100.793	989	939.149	0.35352	2	8.56084	987	930.588	0.022384	192	159.349	793	754.747	1	NA	NA	1086	1041.87	NA	0.0875532	0.00743631	0.138417
Bcin01g08170.3	1	0.00436764	1085	1042.37	0.957101	2	9.98561	985	897.847	0.0111793	12	23.3153	781	722.308	0.0356259	96	119.598	989	922.767	0.0542497	2	14.9343	987	907.832	0.00124529	192	152.224	793	745.623	1	NA	NA	1086	1042.37	NA	0.101621	0.0126895	0.129343
Bcin01g08180.1	1	52.4195	1085	1767.21	1.92931e-12	2	20.0501	985	1387.05	0.000104916	12	52.3293	781	1117.44	1.65739e-06	96	325.531	989	1441.68	2.14309e-26	2	34.5774	987	1407.1	1.38514e-07	192	217.277	793	1169.77	0.145544	NA	NA	1086	1819.63	NA	0.149344	0.0158631	0.0996805
Bcin01g08190.1	1	0.741047	1085	1374.28	0.450405	2	5.38302	985	1180.95	0.0898808	12	29.0181	781	985.077	0.00646615	96	176.706	989	1197.58	1.25269e-06	2	11.2461	987	1186.33	0.00668551	192	166.852	793	1014.09	0.987372	NA	NA	1086	1375.02	NA	0.113058	0.00719534	0.106753
Bcin01g08200.1	1	46.2381	1085	1718.06	4.11257e-11	2	20.397	985	1319.72	8.90727e-05	12	27.0854	781	1007.34	0.0117837	96	367.276	989	1350.79	6.40287e-33	2	10.6634	987	1340.12	0.00870415	192	285.297	793	1034.43	6.91292e-05	NA	NA	1086	1764.3	NA	0.171445	0.00497769	0.133177
Bcin01g08210.1	1	78.7257	1085	2296.31	4.47654e-18	2	74.5991	985	1476.93	5.34752e-16	12	82.8554	781	1172.17	7.51351e-12	96	642.671	989	1653.64	9.97159e-81	2	102.109	987	1551.53	1.90155e-21	192	221.908	793	1255.02	0.102247	NA	NA	1086	2375.03	NA	0.205996	0.0327293	0.0711287
Bcin01g08210.2	1	70.2357	1085	2454.5	2.94506e-16	2	81.3408	985	1569.34	2.10373e-17	12	151.099	781	1149.81	1.12888e-24	96	700.319	989	1754.18	2.0358e-91	2	103.496	987	1650.68	9.77309e-22	192	268.437	793	1300.9	0.000708458	NA	NA	1086	2524.73	NA	0.210398	0.0310935	0.0806469
Bcin01g08220.1	1	51.8225	1085	2734.1	2.59911e-12	2	189.234	985	1460.35	5.33304e-40	12	79.9452	781	1132.1	2.50171e-11	96	945.464	989	1788.64	3.36298e-138	2	139.058	987	1649.58	4.10509e-29	192	248.301	793	1212.05	0.00809621	NA	NA	1086	2785.93	NA	0.244278	0.0359281	0.064153
Bcin01g08230.1	1	0.204691	1085	1936.78	0.699805	2	5.68198	985	1524.47	0.0787167	12	76.3079	781	1187.9	1.12944e-10	96	403.557	989	1533.22	8.44558e-39	2	3.06586	987	1530.15	0.26051	192	260.26	793	1264.21	0.00198738	NA	NA	1086	1936.98	NA	0.172195	0.00130818	0.111051
Bcin01g08240.1	1	8.15617	1085	1967.33	0.00727976	2	41.0714	985	1501.66	4.9908e-09	12	90.3248	781	1187.66	3.25879e-13	96	403.238	989	1564.09	9.53161e-39	2	21.3635	987	1542.73	6.53055e-05	192	223.669	793	1277.99	0.0886455	NA	NA	1086	1975.48	NA	0.16801	0.00890116	0.0931922
Bcin01g08250.1	1	0.656776	1085	1820.78	0.478343	2	0.286193	985	1533.2	0.881192	12	16.007	781	1237.66	0.222477	96	240.253	989	1580.53	3.60203e-14	2	47.0391	987	1533.49	3.97943e-10	192	279.531	793	1253.67	0.000157898	NA	NA	1086	1821.44	NA	0.113933	0.0223069	0.132559
Bcin01g08250.2	1	9.93647	1085	1983.69	0.00294969	2	0.762357	985	1543.18	0.713489	12	53.7302	781	1217.09	9.6411e-07	96	401.873	989	1581.82	1.59603e-38	2	37.8721	987	1543.95	2.988e-08	192	272.367	793	1270.82	0.000421582	NA	NA	1086	1993.63	NA	0.165151	0.0155636	0.11193
Bcin01g08260.1	1	27.2432	1085	2094.49	5.02287e-07	2	0.0912397	985	1497.13	0.959927	12	17.1642	781	1225.51	0.172549	96	393.608	989	1700.88	3.59324e-37	2	203.664	987	1497.22	1.0433e-42	192	254.448	793	1242.68	0.00400042	NA	NA	1086	2121.73	NA	0.144762	0.0749039	0.0935815	6,7-dimethyl-8-ribityllumazine synthase [Botrytis cinerea ]	P:riboflavin biosynthetic process; F:transferase activity; C:riboflavin synthase complex
Bcin01g08270.1	1	0.473239	1085	1328.22	0.549373	2	7.26235	985	1167.44	0.0387286	12	26.6574	781	955.321	0.0134528	96	151.538	989	1176.69	0.000297729	2	1.98823	987	1174.7	0.418765	192	185.457	793	981.979	0.72558	NA	NA	1086	1328.7	NA	0.102237	0.00134138	0.125121
Bcin01g08280.1	1	40.0021	1085	1859.08	9.09735e-10	2	9.32305	985	1547.94	0.0151821	12	33.2913	781	1169.51	0.0016247	96	280.683	989	1578.4	9.64376e-20	2	21.1413	987	1557.26	7.24936e-05	192	345.139	793	1202.8	2.72402e-09	NA	NA	1086	1899.09	NA	0.12753	0.00960569	0.156816
Bcin01g08290.1	1	4.28873	1085	1557.99	0.0555328	2	16.5476	985	1389.21	0.00053743	12	11.8504	781	1119.25	0.488724	96	148.067	989	1409.93	0.000581117	2	4.17306	987	1405.75	0.158895	192	258.108	793	1131.1	0.00258436	NA	NA	1086	1562.28	NA	0.0863605	0.00243395	0.150542
Bcin01g08310.1	1	3.4107	1085	1874.14	0.0899984	2	78.407	985	1495.57	8.56727e-17	12	49.3124	781	1175.14	5.2458e-06	96	274.085	989	1600.05	8.39275e-19	2	26.0769	987	1573.98	7.32177e-06	192	271.115	793	1224.45	0.000498046	NA	NA	1086	1877.55	NA	0.125859	0.0119745	0.124495
Bcin01g08320.1	1	99.6364	1085	2149.11	1.48732e-22	2	6.67215	985	1498.74	0.050511	12	117.502	781	1161.91	2.94793e-18	96	625.74	989	1523.37	1.25749e-77	2	17.958	987	1505.41	0.000313858	192	219.331	793	1279.41	0.124928	NA	NA	1086	2248.75	NA	0.216336	0.00620858	0.0758289
Bcin01g08330.1	1	1.97899	1085	1804.31	0.202957	2	22.6285	985	1458.36	3.10094e-05	12	36.0063	781	1196.03	0.000649555	96	319.177	989	1485.13	1.9912e-25	2	4.13899	987	1480.99	0.161246	192	226.328	793	1232.03	0.0709714	NA	NA	1086	1806.29	NA	0.149876	0.00194355	0.106277
Bcin01g08340.1	1	99.1342	1085	2028.99	1.90324e-22	2	13.5258	985	1310.23	0.0021878	12	34.4351	781	1024.38	0.00111131	96	702.205	989	1326.78	9.07651e-92	2	3.02642	987	1323.76	0.265053	192	251.414	793	1058.82	0.00567688	NA	NA	1086	2128.12	NA	0.247835	0.00106814	0.0887338
Bcin01g08350.1	1	8.86185	1085	1800.12	0.00507019	2	10.2311	985	1527.89	0.00998562	12	27.7674	781	1192.59	0.00955414	96	259.941	989	1540.18	7.95577e-17	2	2.05296	987	1538.13	0.407018	192	307.541	793	1220.35	2.2907e-06	NA	NA	1086	1808.98	NA	0.125516	0.000991299	0.148501
Bcin01g08360.1	1	250.398	1085	2572.81	8.54653e-55	2	130.04	985	1532.51	1.36652e-27	12	166.302	781	1133.5	1.28252e-27	96	795.057	989	1777.76	2.85111e-109	2	115.202	987	1662.55	3.53867e-24	192	232.715	793	1299.8	0.0401549	NA	NA	1086	2823.21	NA	0.212954	0.0308565	0.0623322
Bcin01g08370.1	1	0.499877	1085	1962.95	0.537703	2	12.3443	985	1448.76	0.00378901	12	37.0307	781	1138.83	0.000456775	96	500.301	989	1462.65	3.40397e-55	2	1.54705	987	1461.1	0.507342	192	272.895	793	1175.86	0.00039403	NA	NA	1086	1963.45	NA	0.202937	0.00062753	0.110694
Bcin01g08380.1	1	65.6387	1085	2182.48	2.82343e-15	2	54.7898	985	1632.95	7.16853e-12	12	46.7786	781	1259.86	1.36188e-05	96	449.152	989	1733.33	2.07692e-46	2	45.5892	987	1687.74	7.89446e-10	192	326.309	793	1306.64	9.44096e-08	NA	NA	1086	2248.12	NA	0.163753	0.016621	0.118966
Bcin01g08390.1	1	47.983	1085	1713.17	1.73697e-11	2	2.45571	985	1241.88	0.33686	12	34.2184	781	1017.07	0.00119392	96	467.612	989	1245.55	1.51539e-49	2	1.21613	987	1244.34	0.586338	192	190.592	793	1051.29	0.619031	NA	NA	1086	1761.15	NA	0.209694	0.000545356	0.0854681
Bcin01g08400.1	1	117.926	1085	2024.22	1.85284e-26	2	1.23392	985	1499.9	0.579266	12	28.4539	781	1225.48	0.00773699	96	503.33	989	1520.89	1.01234e-55	2	19.7589	987	1501.13	0.000137702	192	245.967	793	1253.93	0.0104556	NA	NA	1086	2142.15	NA	0.18885	0.00741358	0.0922873
Bcin01g08410.1	1	79.1613	1085	1828.57	3.61763e-18	2	11.2876	985	1495.64	0.00616144	12	18.4814	781	1160.47	0.126786	96	310.529	989	1518.04	4.01231e-24	2	11.1148	987	1506.93	0.00709695	192	316.686	793	1178.96	5.07959e-07	NA	NA	1086	1907.73	NA	0.139289	0.0049856	0.142051
Bcin01g08420.1	1	4.14007	1085	1540.54	0.0601686	2	6.93503	985	1331.36	0.0448451	12	33.7387	781	1082.92	0.00140052	96	167.096	989	1373.44	1.13909e-05	2	35.15	987	1338.29	1.06264e-07	192	214.702	793	1116.66	0.174956	NA	NA	1086	1544.68	NA	0.0956513	0.0201211	0.122902
Bcin01g08430.1	1	225.418	1085	2410.71	1.88588e-49	2	91.5007	985	1403.87	1.54167e-19	12	40.5621	781	1042.37	0.000131973	96	886.88	989	1523.83	7.37016e-127	2	28.4567	987	1495.37	2.4227e-06	192	320.937	793	1082.94	2.41248e-07	NA	NA	1086	2636.13	NA	0.249722	0.00801266	0.0903676
Bcin01g08440.1	1	4.41361	1085	1738.82	0.0519062	2	22.0514	985	1437.11	4.08341e-05	12	25.9123	781	1177.68	0.0168235	96	276.314	989	1462.51	4.05151e-19	2	3.34709	987	1459.16	0.22984	192	233.518	793	1203.59	0.037125	NA	NA	1086	1743.24	NA	0.136593	0.0016546	0.115437
Bcin01g08450.1	1	5.21199	1085	835.308	0.0338681	2	17.0327	985	695.353	0.000429188	12	26.3979	781	510.118	0.0145368	96	122.599	989	712.709	0.036825	2	0.323534	987	712.385	0.868221	192	158.836	793	536.516	1	NA	NA	1086	840.52	NA	0.127251	0.00033581	0.164863
Bcin01g08460.1	1	117.187	1085	1778.51	2.65091e-26	2	7.87235	985	1540.3	0.0294188	12	69.5803	781	1227.16	1.762e-09	96	225.007	989	1553.5	3.33916e-12	2	5.3355	987	1548.17	0.0945959	192	243.557	793	1296.74	0.013498	NA	NA	1086	1895.7	NA	0.105834	0.00250959	0.114559
Bcin01g08470.1	1	157.029	1085	1822.1	8.00672e-35	2	24.9173	985	1524.99	1.06432e-05	12	9.43478	781	1215.61	0.68664	96	237.4	989	1584.7	8.51855e-14	2	34.7995	987	1549.9	1.24858e-07	192	299.942	793	1225.05	7.70469e-06	NA	NA	1086	1979.13	NA	0.105449	0.0154573	0.133229
Bcin01g08480.1	1	1.14091	1085	1910.01	0.34214	2	50.6793	985	1497.44	5.06646e-11	12	49.3038	781	1228.52	5.2593e-06	96	296.838	989	1613.17	4.33746e-22	2	65.0504	987	1548.12	8.11427e-14	192	219.616	793	1277.82	0.122187	NA	NA	1086	1911.15	NA	0.130591	0.0286182	0.0966177
Bcin01g08490.1	1	310.514	1085	1968.01	1.18694e-67	2	9.05062	985	1536.74	0.01721	12	27.9644	781	1241.05	0.00900542	96	412.21	989	1555.8	3.17182e-40	2	10.0066	987	1545.79	0.0116804	192	267.723	793	1269.02	0.000776004	NA	NA	1086	2278.52	NA	0.152629	0.00370513	0.0991295
Bcin01g08500.1	1	55.3914	1085	2281.66	4.46207e-13	2	137.085	985	1509.94	4.59558e-29	12	59.5425	781	1187.59	9.86439e-08	96	509.277	989	1772.39	9.2386e-57	2	125.361	987	1647.03	2.78604e-26	192	262.814	793	1247.13	0.0014592	NA	NA	1086	2337.06	NA	0.171376	0.0421849	0.0884392
Bcin01g08510.1	1	33.638	1085	1961.95	2.13326e-08	2	112.875	985	1404.04	5.34637e-24	12	35.2002	781	1123.11	0.000855532	96	436.88	989	1525.07	2.45951e-44	2	8.15239	987	1516.92	0.0268611	192	245.733	793	1158.31	0.010723	NA	NA	1086	1995.59	NA	0.179004	0.0033403	0.100685
Bcin01g08520.1	1	176.694	1085	1920.84	4.99291e-39	2	20.2493	985	1476.58	9.54842e-05	12	68.8491	781	1146.92	2.3662e-09	96	388.972	989	1531.86	2.0337e-36	2	35.0332	987	1496.83	1.12283e-07	192	260.815	793	1215.77	0.00185888	NA	NA	1086	2097.53	NA	0.15426	0.0138936	0.103435
Bcin01g08530.1	1	16.1867	1085	1762.87	0.000125885	2	14.4614	985	1447.98	0.00141573	12	33.5192	781	1173.34	0.0015052	96	282.275	989	1480.59	5.70975e-20	2	18.1524	987	1462.44	0.000287331	192	241.118	793	1206.86	0.0173896	NA	NA	1086	1779.06	NA	0.135743	0.00872927	0.115951
Bcin01g08540.1	1	92.0713	1085	1961.38	6.22982e-21	2	65.0002	985	1436.16	5.27004e-14	12	37.7669	781	1143.85	0.000353462	96	410.738	989	1550.64	5.55425e-40	2	49.4794	987	1501.16	1.24642e-10	192	254.538	793	1181.62	0.00395794	NA	NA	1086	2053.45	NA	0.163402	0.0196842	0.101262
Bcin01g08550.1	1	87.0779	1085	2139.49	7.32662e-20	2	67.2813	985	1618.34	1.78343e-14	12	83.7148	781	1231.37	5.25329e-12	96	448.944	989	1690.55	2.24979e-46	2	4.93228	987	1685.62	0.113265	192	303.253	793	1315.08	4.57676e-06	NA	NA	1086	2226.57	NA	0.167489	0.0018401	0.113135
Bcin01g08560.1	1	2.41237	1085	1789.02	0.157167	2	3.90276	985	1497.47	0.175639	12	27.3211	781	1182.16	0.0109677	96	259.076	989	1529.94	1.0455e-16	2	28.568	987	1501.37	2.29881e-06	192	287.985	793	1209.49	4.66648e-05	NA	NA	1086	1791.43	NA	0.124611	0.0137407	0.138516
Bcin01g08570.1	1	11.662	1085	1730.05	0.00123331	2	8.56387	985	1524.87	0.0214996	12	31.3145	781	1266.97	0.00310651	96	146.934	989	1583.12	0.000719744	2	49.681	987	1533.44	1.13453e-10	192	226.594	793	1298.28	0.0693689	NA	NA	1086	1741.72	NA	0.0758044	0.0256308	0.116902
Bcin01g08580.1	1	13.4317	1085	4376.57	0.000505823	2	15.9528	985	1501.63	0.000709248	12	37.2503	781	1124.92	0.000423706	96	2813.67	989	1562.9	0	2	45.3188	987	1517.58	8.97045e-10	192	339.45	793	1162.18	8.03452e-09	NA	NA	1086	4390	NA	0.388147	0.00625175	0.0468273	hypothetical protein BC1G_00053	no GO terms
Bcin01g08590.1	1	11.5965	1085	798.346	0.00127509	2	2.09181	985	675.535	0.396711	12	11.2098	781	505.109	0.539749	96	116.741	989	681.605	0.0768848	2	3.97844	987	677.626	0.173057	192	159.216	793	516.319	1	NA	NA	1086	809.942	NA	0.125439	0.00427485	0.171078
Bcin01g08600.1	1	1.25257	1085	1356.14	0.317673	2	8.03907	985	1182.46	0.0273051	12	19.5302	781	973.316	0.0978138	96	150.637	989	1205.51	0.000354794	2	15.0135	987	1190.49	0.00120092	192	189.61	793	992.846	0.639434	NA	NA	1086	1357.4	NA	0.0989047	0.00985753	0.124494
Bcin01g08610.1	1	194.175	1085	1813.5	9.09563e-43	2	44.4388	985	1237.49	1.00412e-09	12	64.3172	781	872.269	1.46808e-08	96	522.831	989	1290.67	3.89177e-59	2	8.74418	987	1281.92	0.020639	192	300.899	793	936.586	6.61154e-06	NA	NA	1086	2007.67	NA	0.2059	0.00344361	0.118499
Bcin01g08620.1	1	202.641	1085	1966.77	1.42448e-44	2	72.0355	985	1376.82	1.83166e-15	12	67.1862	781	938.912	4.61955e-09	96	510.084	989	1456.68	6.68643e-57	2	7.82382	987	1448.86	0.0311318	192	370.724	793	1006.1	1.32056e-11	NA	NA	1086	2169.41	NA	0.189812	0.00291139	0.137953
Bcin01g08640.1	1	0.271101	1085	798.945	0.654402	2	1.58141	985	703.148	0.497404	12	21.381	781	519.125	0.0605829	96	89.3361	989	709.609	0.673331	2	4.88013	987	704.729	0.115966	192	162.642	793	540.506	1	NA	NA	1086	799.216	NA	0.099992	0.00546222	0.182041
Bcin01g08650.1	1	38.3903	1085	2026.49	2.01622e-09	2	3.05156	985	1578.08	0.257109	12	76.1995	781	1239.76	1.18139e-10	96	402.656	989	1623.83	1.18734e-38	2	42.703	987	1581.13	3.05945e-09	192	262.125	793	1315.96	0.00158572	NA	NA	1086	2064.88	NA	0.160405	0.0170115	0.104422
Bcin01g08660.1	1	43.7975	1085	1906.87	1.38618e-10	2	70.7427	985	1446.58	3.4046e-15	12	32.7994	781	1128.6	0.00191133	96	375.698	989	1531.18	2.86892e-34	2	13.8541	987	1517.32	0.00202775	192	285.181	793	1161.4	7.01269e-05	NA	NA	1086	1950.67	NA	0.160539	0.00591999	0.121861
Bcin01g08670.1	1	87.2648	1085	1704.04	6.69636e-20	2	20.1123	985	1433.6	0.000101915	12	57.682	781	1107.78	2.06775e-07	96	238.384	989	1465.66	6.33624e-14	2	11.9495	987	1453.71	0.00484835	192	268.141	793	1165.46	0.000736212	NA	NA	1086	1791.31	NA	0.116761	0.00585286	0.131336
Bcin01g08680.1	1	398.608	1085	2194.58	1.65712e-86	2	105.943	985	1473.68	1.49189e-22	12	81.1656	781	1156.85	1.51114e-11	96	518.985	989	1675.6	1.85103e-58	2	95.9709	987	1579.63	3.48713e-20	192	235.667	793	1238.02	0.0300486	NA	NA	1086	2593.19	NA	0.161771	0.0299148	0.073459
Bcin01g08690.1	1	82.3622	1085	2224.15	7.50267e-19	2	45.9854	985	1655.54	4.78163e-10	12	145.286	781	1192.47	1.43048e-23	96	507.223	989	1716.92	2.10713e-56	2	15.3973	987	1701.53	0.00101004	192	317.783	793	1337.76	4.18754e-07	NA	NA	1086	2306.51	NA	0.179286	0.0054424	0.112325
Bcin01g08710.1	1	4.46173	1085	1811.31	0.050654	2	1.57577	985	1450.89	0.498513	12	37.4668	781	1163.73	0.000392645	96	281.131	989	1530.18	8.31998e-20	2	77.715	987	1452.46	2.05374e-16	192	249.689	793	1201.2	0.00693388	NA	NA	1086	1815.77	NA	0.129278	0.0357374	0.11482
Bcin01g08720.1	1	4.97822	1085	2112.5	0.0384054	2	24.7027	985	1584.58	1.17789e-05	12	45.3465	781	1263.98	2.31933e-05	96	451.083	989	1661.42	9.80322e-47	2	52.1339	987	1609.29	3.56312e-11	192	275.258	793	1309.32	0.000285711	NA	NA	1086	2117.48	NA	0.172123	0.0198931	0.105032
Bcin01g08730.1	1	8.32009	1085	1894.67	0.00669549	2	12.1559	985	1480.79	0.00413333	12	27.8871	781	1211.14	0.00921556	96	376.095	989	1518.57	2.47908e-34	2	25.6263	987	1492.95	9.04058e-06	192	241.758	793	1239.03	0.0162677	NA	NA	1086	1902.99	NA	0.163185	0.0111191	0.104897
Bcin01g08740.1	1	12.0754	1085	2263.91	0.0010001	2	10.6738	985	1410.94	0.00816063	12	18.9965	781	1111.73	0.111853	96	792.515	989	1471.39	8.69244e-109	2	49.7722	987	1421.62	1.08533e-10	192	280.216	793	1130.73	0.000143526	NA	NA	1086	2275.98	NA	0.254152	0.0159615	0.0898626
Bcin01g08750.1	1	4.86902	1085	1422.49	0.0406749	2	5.95176	985	1278.71	0.0698802	12	15.6025	781	1046.71	0.242973	96	137.741	989	1284.74	0.00370626	2	0.0783086	987	1284.67	0.967019	192	216.4	793	1062.31	0.155235	NA	NA	1086	1427.35	NA	0.0880037	5.00319e-05	0.13826
Bcin01g08760.1	1	7.18366	1085	2131.5	0.0120315	2	85.8766	985	1546.79	2.32336e-18	12	97.8824	781	1236.65	1.34073e-14	96	416.054	989	1715.44	7.3192e-41	2	82.7784	987	1632.67	1.8907e-17	192	212.261	793	1334.53	0.206921	NA	NA	1086	2138.68	NA	0.157745	0.031385	0.0804776
Bcin01g08770.1	1	4.86512	1085	2044.27	0.040741	2	6.51159	985	1569.9	0.0543754	12	42.4933	781	1207.18	6.58933e-05	96	430.397	989	1613.87	2.99481e-43	2	37.4591	987	1576.41	3.61831e-08	192	320.224	793	1249.67	2.71123e-07	NA	NA	1086	2049.13	NA	0.170997	0.0148825	0.127225
Bcin01g08780.1	1	0.719173	1085	1969.93	0.457239	2	3.88328	985	1406.59	0.177075	12	23.1401	781	1166.95	0.0374175	96	528.956	989	1440.97	3.2506e-60	2	30.4962	987	1410.47	9.34604e-07	192	216.505	793	1190.09	0.154026	NA	NA	1086	1970.65	NA	0.209065	0.0120534	0.0855717
Bcin01g08790.1	1	25.3833	1085	1823.01	1.26799e-06	2	5.96534	985	1526.33	0.0694481	12	46.0863	781	1192.1	1.75839e-05	96	288.785	989	1534.23	6.52596e-21	2	1.93219	987	1532.3	0.428784	192	288.144	793	1238.19	4.55575e-05	NA	NA	1086	1848.4	NA	0.135002	0.000903267	0.134702
Bcin01g08810.1	1	4.87056	1085	1253.96	0.0406516	2	1.25193	985	1105.02	0.574403	12	18.7855	781	898.263	0.117761	96	145.723	989	1108.23	0.000902123	2	1.95916	987	1106.27	0.42412	192	187.974	793	917.048	0.672539	NA	NA	1086	1258.83	NA	0.103606	0.00139293	0.133646
Bcin01g08820.1	1	1.25564	1085	1694.35	0.31705	2	5.32876	985	1495.93	0.0920457	12	37.397	781	1205.58	0.000402695	96	187.663	989	1506.68	8.63862e-08	2	5.42437	987	1501.26	0.0908576	192	252.948	793	1242.98	0.00477123	NA	NA	1086	1695.6	NA	0.0993616	0.00287203	0.133928
Bcin01g08830.1	1	0.839888	1085	847.164	0.420216	2	4.9345	985	727.564	0.110087	12	13.4114	781	562.828	0.373756	96	105.805	989	741.359	0.236489	2	8.86022	987	732.499	0.0196103	192	151.324	793	576.24	1	NA	NA	1086	848.004	NA	0.109908	0.00920381	0.157193
Bcin01g08830.2	1	5.88643	1085	738.087	0.0237239	2	6.02134	985	631.29	0.0677108	12	7.71575	781	482.923	0.81839	96	85.009	989	653.078	0.782788	2	15.7666	987	637.311	0.000855307	192	140.651	793	490.638	1	NA	NA	1086	743.973	NA	0.100632	0.0186643	0.166501
Bcin01g08830.4	1	0.0712462	1085	758.43	0.821934	2	8.1933	985	655.533	0.0254494	12	17.5194	781	509.981	0.159331	96	91.3964	989	667.034	0.616107	2	3.30704	987	663.727	0.233934	192	128.033	793	527.501	1	NA	NA	1086	758.501	NA	0.107121	0.00387602	0.150061
Bcin01g08840.1	1	26.6135	1085	2088.41	6.88476e-07	2	23.0748	985	1619.67	2.51656e-05	12	24.151	781	1234.44	0.0281749	96	414.613	989	1673.8	1.26912e-40	2	31.0521	987	1642.74	7.22125e-07	192	361.08	793	1258.59	1.06533e-10	NA	NA	1086	2115.02	NA	0.161915	0.0121265	0.141009
Bcin01g08850.1	1	129.281	1085	2008.15	6.92685e-29	2	79.592	985	1551.13	4.83185e-17	12	60.4005	781	1171.09	7.02041e-08	96	353.373	989	1654.78	1.02001e-30	2	24.0609	987	1630.72	1.86683e-05	192	319.64	793	1231.49	3.02052e-07	NA	NA	1086	2137.44	NA	0.140513	0.00956744	0.1271
Bcin01g08860.1	1	0.063085	1085	1520.11	0.831974	2	28.5341	985	1218.22	1.93857e-06	12	53.5199	781	951.548	1.04505e-06	96	272.173	989	1247.94	1.563e-18	2	1.18628	987	1246.75	0.594118	192	213.15	793	1005.07	0.194999	NA	NA	1086	1520.17	NA	0.151752	0.000661422	0.118844
Bcin01g08870.1	1	24.5622	1085	2373.44	1.90523e-06	2	113.173	985	1588.27	4.64214e-24	12	144.074	781	1163.13	2.44896e-23	96	649.931	989	1723.51	4.57107e-82	2	22.0638	987	1701.44	4.70522e-05	192	281.063	793	1307.21	0.000126629	NA	NA	1086	2398	NA	0.211704	0.00718692	0.0915516
Bcin01g08880.1	1	5.86496	1085	1850.93	0.0239869	2	23.5778	985	1488.09	1.99289e-05	12	65.9658	781	1208	7.54752e-09	96	324.111	989	1526.82	3.53311e-26	2	15.1428	987	1511.67	0.00113242	192	214.133	793	1273.96	0.182181	NA	NA	1086	1856.79	NA	0.147588	0.00689547	0.0975085
Bcin01g08890.1	1	0.0394051	1085	822.021	0.867792	2	1.39121	985	718.384	0.540201	12	11.7696	781	562.63	0.495125	96	95.1085	989	726.912	0.509824	2	7.13649	987	719.776	0.0422488	192	143.985	793	574.399	1	NA	NA	1086	822.06	NA	0.102897	0.00772093	0.155777
Bcin01g08900.1	1	12.8919	1085	2136.38	0.000663424	2	19.4672	985	1488.01	0.000137818	12	31.4178	781	1138.11	0.00300449	96	624.892	989	1511.49	1.79646e-77	2	4.00562	987	1507.48	0.170884	192	318.481	793	1169.53	3.67223e-07	NA	NA	1086	2149.27	NA	0.22493	0.00144182	0.114637
Bcin01g08910.1	1	15.0307	1085	2569.68	0.000225751	2	72.24	985	1490.39	1.6637e-15	12	60.9558	781	1142.18	5.61615e-08	96	988.441	989	1581.24	1.43011e-146	2	18.608	987	1562.63	0.000233465	192	287.255	793	1203.14	5.18608e-05	NA	NA	1086	2584.71	NA	0.275197	0.00518076	0.0799761
Bcin01g08920.1	1	25.5191	1085	2119.39	1.18489e-06	2	77.3344	985	1545.42	1.43385e-16	12	121.226	781	1231.19	5.89799e-19	96	467.106	989	1652.28	1.85039e-49	2	29.5248	987	1622.75	1.4755e-06	192	193.004	793	1352.42	0.566944	NA	NA	1086	2144.9	NA	0.176831	0.0111771	0.0730652
Bcin01g08920.2	1	13.7273	1085	2211.47	0.000435566	2	62.7207	985	1626	1.57857e-13	12	118.379	781	1243.72	2.02844e-18	96	507.614	989	1703.85	1.80539e-56	2	15.13	987	1688.72	0.00113912	192	263.9	793	1362.1	0.00127841	NA	NA	1086	2225.19	NA	0.184725	0.00550596	0.0960358
Bcin01g08930.1	1	0.455729	1085	1508.3	0.557249	2	19.6352	985	1300.75	0.000127448	12	14.7293	781	1086.15	0.291202	96	175.133	989	1333.17	1.8142e-06	2	12.7854	987	1320.38	0.00329079	192	199.869	793	1100.88	0.420702	NA	NA	1086	1508.75	NA	0.103221	0.00753556	0.1178
Bcin01g08940.1	1	41.7613	1085	1513.6	3.80981e-10	2	7.50141	985	1295.85	0.0346876	12	19.1324	781	1075.46	0.108099	96	192.01	989	1321.59	2.86003e-08	2	18.2463	987	1303.35	0.000275186	192	201.252	793	1094.59	0.392184	NA	NA	1086	1555.37	NA	0.108749	0.0103342	0.113984
Bcin01g08960.1	1	26.2276	1085	1829.9	8.33022e-07	2	40.8831	985	1524.1	5.44243e-09	12	32.1089	781	1205.64	0.00240449	96	263.522	989	1566.38	2.54548e-17	2	1.39372	987	1564.98	0.542434	192	286.351	793	1237.75	5.93675e-05	NA	NA	1086	1856.13	NA	0.124242	0.000657093	0.135005
Bcin01g08970.1	1	22.9028	1085	2124.93	4.36043e-06	2	12.7688	985	1546.88	0.00311506	12	94.642	781	1230.48	5.29776e-14	96	558.001	989	1566.93	2.264e-65	2	7.28214	987	1559.65	0.0395687	192	221.758	793	1325.12	0.103516	NA	NA	1086	2147.83	NA	0.205668	0.00268405	0.0817354
Bcin01g08980.1	1	0.123287	1085	2140.98	0.766095	2	1.04243	985	1631.03	0.629822	12	140.119	781	1209.86	1.44124e-22	96	465.721	989	1675.26	3.18327e-49	2	43.1868	987	1632.07	2.43825e-09	192	281.056	793	1349.98	0.000126688	NA	NA	1086	2141.11	NA	0.175743	0.0162968	0.106058
Bcin01g08990.1	1	43.7903	1085	2046.52	1.39021e-10	2	40.2926	985	1599.21	7.20644e-09	12	97.7258	781	1247.97	1.42998e-14	96	361.475	989	1685.05	5.35544e-32	2	45.5445	987	1639.5	8.06196e-10	192	253.518	793	1345.69	0.0044678	NA	NA	1086	2090.31	NA	0.144744	0.0182373	0.101515
Bcin01g09000.1	1	25.979	1085	2254.78	9.43014e-07	2	120.021	985	1747.63	1.69689e-25	12	188.328	781	1262.7	7.0647e-32	96	375.005	989	1879.77	3.70412e-34	2	12.1192	987	1867.65	0.00448142	192	296.604	793	1451.03	1.28957e-05	NA	NA	1086	2280.75	NA	0.140563	0.00454264	0.111176
Bcin01g09010.1	1	22.0133	1085	845.694	6.80678e-06	2	1.43709	985	688.379	0.529494	12	30.1738	781	522.329	0.00447839	96	148.691	989	697.003	0.000515883	2	7.18695	987	689.816	0.0413161	192	135.877	793	552.503	1	NA	NA	1086	867.707	NA	0.145265	0.00702135	0.132746
Bcin01g09020.1	1	3.9274	1085	2230.55	0.0675509	2	52.9663	985	1355.72	1.709e-11	12	69.4462	781	1045.75	1.86202e-09	96	800.298	989	1430.25	2.87065e-110	2	21.5648	987	1408.69	5.9437e-05	192	240.52	793	1115.2	0.018526	NA	NA	1086	2234.48	NA	0.261849	0.00705575	0.0786956
Bcin01g09030.1	1	66.9951	1085	1764.8	1.44068e-15	2	7.44862	985	1449.27	0.0355532	12	25.9314	781	1165.88	0.016722	96	303.176	989	1461.62	5.00696e-23	2	4.90805	987	1456.72	0.114547	192	257.459	793	1191.81	0.00278481	NA	NA	1086	1831.8	NA	0.141679	0.00229361	0.120315
Bcin01g09040.1	1	239.961	1085	2205.49	1.41598e-52	2	138.816	985	1588.01	1.97946e-29	12	170.999	781	1195.3	1.65772e-28	96	426.051	989	1779.44	1.59406e-42	2	52.6104	987	1726.83	2.84895e-11	192	221.711	793	1366.3	0.103895	NA	NA	1086	2445.45	NA	0.145703	0.0179919	0.0758218
Bcin01g09050.1	1	1.69564	1085	1586.8	0.240822	2	1.36977	985	1352.88	0.545374	12	28.7707	781	1161.7	0.00700246	96	214.873	989	1371.93	6.03315e-11	2	17.6813	987	1354.25	0.000356415	192	162.408	793	1190.47	1	NA	NA	1086	1588.5	NA	0.117994	0.00970936	0.0891836
Bcin01g09060.1	1	20.3028	1085	1808.52	1.59489e-05	2	0.643275	985	1568.81	0.752494	12	35.5662	781	1228.37	0.000755142	96	234.091	989	1574.43	2.29922e-13	2	4.97419	987	1569.45	0.111187	192	304.871	793	1263.94	3.53853e-06	NA	NA	1086	1828.82	NA	0.113203	0.00240545	0.147432
Bcin01g09070.1	1	0.0655691	1085	758.247	0.828974	2	7.8837	985	642.549	0.0292903	12	14.6488	781	476.348	0.295699	96	97.6317	989	660.615	0.438134	2	10.1827	987	650.433	0.0108049	192	151.552	793	490.997	1	NA	NA	1086	758.313	NA	0.112722	0.0117566	0.174976
Bcin01g09080.1	1	56.1592	1085	1915.99	3.04168e-13	2	54.2207	985	1502.53	9.40803e-12	12	66.9651	781	1228.36	5.04503e-09	96	356.032	989	1559.96	3.89121e-31	2	3.21136	987	1556.75	0.244176	192	207.205	793	1295.32	0.283241	NA	NA	1086	1972.15	NA	0.152712	0.00137744	0.088876
Bcin01g09080.2	1	36.6538	1085	2019.49	4.78394e-09	2	32.7569	985	1657.53	2.63769e-07	12	91.6284	781	1230.96	1.87989e-13	96	328.587	989	1690.9	7.30244e-27	2	0.614563	987	1690.29	0.76494	192	334.944	793	1322.58	1.92926e-08	NA	NA	1086	2056.14	NA	0.137753	0.000257641	0.140418
Bcin01g09090.1	1	2.77546	1085	1190.91	0.128252	2	8.61857	985	1027.87	0.0209617	12	13.9692	781	814.926	0.336777	96	147.133	989	1043.77	0.000693193	2	7.28782	987	1036.49	0.0394756	192	198.972	793	828.895	0.43897	NA	NA	1086	1193.68	NA	0.109141	0.00540599	0.147594
Bcin01g09100.1	1	10.9178	1085	2102.09	0.00179614	2	80.2729	985	1501.16	3.50057e-17	12	67.1153	781	1185.58	4.75507e-09	96	512.472	989	1589.62	2.56523e-57	2	8.18686	987	1581.43	0.0264251	192	248.458	793	1252.7	0.00796201	NA	NA	1086	2113.01	NA	0.194585	0.00310854	0.0943393
Bcin01g09110.1	1	7.0385	1085	2747.82	0.01298	2	127.966	985	1637.05	3.73091e-27	12	177.218	781	1151.2	1.03807e-29	96	972.197	989	1775.62	2.07985e-143	2	10.6056	987	1765.01	0.00892146	192	308.627	793	1328.42	1.92432e-06	NA	NA	1086	2754.86	NA	0.260109	0.00283749	0.0825724
Bcin01g09120.1	1	101.815	1085	1879.87	5.0673e-23	2	17.2747	985	1475.14	0.000384266	12	31.8849	781	1243.22	0.00258857	96	372.657	989	1507.22	8.85335e-34	2	14.8054	987	1492.41	0.00132202	192	200.031	793	1275.1	0.417228	NA	NA	1086	1981.69	NA	0.157296	0.00624925	0.0844317
Bcin01g09130.1	1	1.8418	1085	820.927	0.220359	2	1.66812	985	686.773	0.478744	12	14.5949	781	506.882	0.298777	96	131.284	989	689.643	0.0105439	2	1.20148	987	688.441	0.590308	192	165.296	793	521.477	0.998042	NA	NA	1086	822.769	NA	0.137434	0.00125776	0.173039
Bcin01g09140.1	1	79.2932	1085	1976.79	3.3955e-18	2	23.4767	985	1535.58	2.09031e-05	12	63.8983	781	1208.14	1.73356e-08	96	410.046	989	1566.74	7.22836e-40	2	7.68444	987	1559.06	0.0331509	192	263.544	793	1272.04	0.00133807	NA	NA	1086	2056.08	NA	0.165755	0.00310632	0.106534
Bcin01g09140.2	1	59.6034	1085	2006.04	5.54439e-14	2	19.7915	985	1531.09	0.0001184	12	60.7454	781	1212.83	6.10907e-08	96	428.938	989	1577.1	5.26066e-43	2	26.223	987	1550.88	6.85301e-06	192	257.508	793	1273.58	0.00276997	NA	NA	1086	2065.64	NA	0.170159	0.0104027	0.102153
Bcin01g09150.1	1	300.194	1085	1952.91	1.95438e-65	2	91.1691	985	1455.59	1.80413e-19	12	17.4166	781	1186.1	0.163057	96	305.462	989	1647.45	2.29372e-23	2	100.686	987	1546.76	3.72944e-21	192	252.07	793	1203.52	0.00527186	NA	NA	1086	2253.1	NA	0.114868	0.0378627	0.0947898
Bcin01g09160.1	1	10.5057	1085	1917.28	0.00221013	2	46.4414	985	1506.54	3.84517e-10	12	73.5738	781	1168.75	3.45331e-10	96	347.011	989	1570.27	1.01539e-29	2	17.2861	987	1552.98	0.000426807	192	264.222	793	1242.32	0.00122572	NA	NA	1086	1927.79	NA	0.151396	0.00754164	0.115276
Bcin01g09170.1	1	91.4402	1085	2040.01	8.51511e-21	2	25.7736	985	1415	7.12976e-06	12	20.3434	781	1167.63	0.079495	96	575.2	989	1464.81	1.88649e-68	2	24.0363	987	1440.77	1.88863e-05	192	227.025	793	1187.98	0.066818	NA	NA	1086	2131.45	NA	0.210643	0.00880229	0.0831385
Bcin01g09180.1	1	13.7742	1085	2202.37	0.000425203	2	71.7478	985	1663.02	2.10051e-15	12	157.141	781	1244.5	7.54298e-26	96	450.458	989	1751.92	1.25054e-46	2	17.1489	987	1734.77	0.000454856	192	261.382	793	1401.64	0.00173675	NA	NA	1086	2216.15	NA	0.167846	0.00638989	0.0973943
Bcin01g09200.1	1	52.5527	1085	1754.8	1.80696e-12	2	55.846	985	1324.7	4.31161e-12	12	30.484	781	1019.79	0.0040588	96	363.563	989	1391.24	2.49596e-32	2	10.6889	987	1380.55	0.00860552	192	274.429	793	1050.27	0.000319278	NA	NA	1086	1807.35	NA	0.166649	0.00489956	0.125792
Bcin01g09230.1	1	108.902	1085	2426.68	1.55189e-24	2	115.894	985	1736.86	1.24703e-24	12	149.577	781	1237.81	2.18149e-24	96	514.849	989	1911.83	9.81033e-58	2	59.0745	987	1852.76	1.39251e-12	192	349.47	793	1387.39	1.17482e-09	NA	NA	1086	2535.58	NA	0.165573	0.018998	0.112388
Bcin01g09240.1	1	12.3808	1085	2052.04	0.000857923	2	6.14767	985	1631.46	0.0640018	12	64.7473	781	1244.28	1.23722e-08	96	355.312	989	1696.73	5.04935e-31	2	59.125	987	1637.61	1.36055e-12	192	322.428	793	1309.03	1.89598e-07	NA	NA	1086	2064.42	NA	0.143337	0.0238517	0.130071
Bcin01g09250.1	1	1.81332	1085	1542.54	0.224062	2	11.0069	985	1336.18	0.00700992	12	18.4779	781	1121.18	0.126887	96	172.072	989	1370.47	3.69321e-06	2	23.277	987	1347.19	2.68294e-05	192	196.521	793	1139.66	0.490253	NA	NA	1086	1544.35	NA	0.0989088	0.0133799	0.112963
Bcin01g09260.1	1	0.360779	1085	1053.4	0.604027	2	7.88973	985	915.918	0.0292116	12	13.7784	781	726.365	0.349266	96	128.574	989	924.825	0.0159024	2	1.01687	987	923.808	0.640411	192	175.776	793	740.143	0.89228	NA	NA	1086	1053.76	NA	0.108652	0.000859311	0.148541
Bcin01g09270.1	1	13.3345	1085	1804.18	0.000530627	2	32.7182	985	1372.39	2.68616e-07	12	37.6281	781	1114.62	0.00037069	96	376.85	989	1427.33	1.87431e-34	2	22.2211	987	1405.11	4.37408e-05	192	220.144	793	1152.24	0.117358	NA	NA	1086	1817.51	NA	0.170014	0.0100249	0.0993168
Bcin01g09280.1	1	16.9447	1085	1806.03	8.58876e-05	2	13.0215	985	1514.4	0.00276784	12	17.5887	781	1225.36	0.156799	96	273.24	989	1532.79	1.10557e-18	2	5.36807	987	1527.42	0.0932486	192	271.456	793	1242.95	0.000476549	NA	NA	1086	1822.98	NA	0.130016	0.0025543	0.129167
Bcin01g09300.1	1	17.6654	1085	1922.04	5.98123e-05	2	41.9398	985	1512.19	3.29008e-09	12	47.4179	781	1221.26	1.07387e-05	96	359.275	989	1562.77	1.19335e-31	2	8.63866	987	1554.13	0.021605	192	243.509	793	1268.68	0.0135636	NA	NA	1086	1939.71	NA	0.15569	0.00374353	0.105524
Bcin01g09310.1	1	135.899	1085	1967.93	2.68875e-30	2	10.2142	985	1432.77	0.0100667	12	42.3719	781	1173.51	6.88982e-05	96	483.561	989	1484.37	2.71673e-52	2	41.3912	987	1442.98	5.69478e-09	192	216.881	793	1215.88	0.149795	NA	NA	1086	2103.83	NA	0.183949	0.0157454	0.0825023
Bcin01g09320.1	1	101.958	1085	1961.3	4.72286e-23	2	0.0121651	985	1533.75	0.994257	12	64.5363	781	1226.77	1.35043e-08	96	396.045	989	1565.26	1.44069e-37	2	31.4992	987	1533.76	5.86566e-07	192	242.444	793	1291.3	0.01511	NA	NA	1086	2063.26	NA	0.159003	0.0126462	0.0973357
Bcin01g09330.1	1	257.924	1085	1879.9	2.08003e-56	2	33.2944	985	1508.46	2.03635e-07	12	39.3697	781	1216.88	0.00020204	96	285.039	989	1594.86	2.2819e-20	2	53.1046	987	1541.75	2.25274e-11	192	252.205	793	1256.25	0.00519547	NA	NA	1086	2137.82	NA	0.115122	0.0214481	0.101861
Bcin01g09340.1	1	34.7869	1085	1831.92	1.21316e-08	2	15.1568	985	1543.02	0.00102339	12	22.4489	781	1223.18	0.0452558	96	267.251	989	1564.67	7.7006e-18	2	6.48875	987	1558.18	0.0566644	192	297.395	793	1245.63	1.13787e-05	NA	NA	1086	1866.71	NA	0.124858	0.0030315	0.138941
Bcin01g09350.1	1	223.073	1085	2047.64	5.97918e-49	2	40.4679	985	1526.16	6.62757e-09	12	75.3808	781	1134.43	1.65708e-10	96	461.382	989	1586.26	1.74597e-48	2	19.6335	987	1566.63	0.000145684	192	316.352	793	1209.81	5.35404e-07	NA	NA	1086	2270.72	NA	0.16767	0.00713497	0.114965
Bcin01g09360.1	1	102.424	1085	2060.13	3.75962e-23	2	4.75437	985	1479.1	0.119598	12	80.6001	781	1178.12	1.91019e-11	96	542.194	989	1517.93	1.46874e-62	2	34.0765	987	1483.85	1.74662e-07	192	220.376	793	1258.72	0.115241	NA	NA	1086	2162.55	NA	0.197966	0.012442	0.0804638
Bcin01g09370.1	1	0.283236	1085	2204.27	0.64654	2	61.068	985	1522.54	3.50042e-13	12	79.4744	781	1175.54	3.03349e-11	96	592.463	989	1611.81	1.4506e-71	2	28.1944	987	1583.61	2.72669e-06	192	267.535	793	1255.01	0.000794631	NA	NA	1086	2204.55	NA	0.209706	0.00997957	0.0946956
Bcin01g09370.2	1	0.23128	1085	2151.46	0.680571	2	62.5855	985	1530.61	1.68064e-13	12	70.1199	781	1198.32	1.41479e-09	96	525.176	989	1626.28	1.50775e-59	2	33.0863	987	1593.2	2.78454e-07	192	262.171	793	1268.44	0.00157882	NA	NA	1086	2151.69	NA	0.193795	0.0122092	0.0967436
Bcin01g09370.3	1	1.34034	1085	2067.21	0.300197	2	44.2704	985	1475.13	1.08972e-09	12	55.4636	781	1179.64	4.92541e-07	96	524.281	989	1542.93	2.1659e-59	2	23.5336	987	1519.4	2.37626e-05	192	240.025	793	1235.1	0.0195147	NA	NA	1086	2068.56	NA	0.200385	0.00899475	0.0917396
Bcin01g09380.1	1	8.94995	1085	1493.63	0.00484866	2	0.35911	985	1171.76	0.852539	12	50.9955	781	974.474	2.77068e-06	96	318.957	989	1174.68	2.1493e-25	2	2.55627	987	1172.12	0.32653	192	146.292	793	1025.47	1	NA	NA	1086	1502.58	NA	0.174857	0.00140139	0.0801996
Bcin01g09400.1	1	259.994	1085	2534.83	7.46722e-57	2	110.433	985	1661.23	1.72546e-23	12	237.318	781	1204.81	1.68668e-41	96	762.626	989	1772.2	3.9756e-103	2	0.536648	987	1771.66	0.79178	192	219.1	793	1442.13	0.127063	NA	NA	1086	2794.82	NA	0.214342	0.000150829	0.06158
Bcin01g09410.1	1	3.6909	1085	1586.82	0.0769471	2	0.549742	985	820.927	0.784426	12	23.9871	781	634.254	0.0294796	96	762.518	989	824.298	4.15948e-103	2	2.82137	987	821.477	0.29058	192	162.685	793	658.241	1	NA	NA	1086	1590.51	NA	0.323671	0.0011976	0.069056
Bcin01g09430.1	1	8.72523	1085	1580.1	0.00543389	2	43.2627	985	986.89	1.76029e-09	12	20.5615	781	680.824	0.0750458	96	539.491	989	1040.61	4.45521e-62	2	10.4524	987	1030.15	0.00955392	192	285.505	793	701.386	6.70393e-05	NA	NA	1086	1588.82	NA	0.252244	0.00488713	0.13349
Bcin01g09440.1	1	68.2637	1085	1882.36	7.78357e-16	2	5.69261	985	1528.03	0.0783566	12	82.6391	781	1190.22	8.19243e-12	96	319.758	989	1562.6	1.62555e-25	2	28.8742	987	1533.72	1.99609e-06	192	255.172	793	1272.86	0.00366592	NA	NA	1086	1950.62	NA	0.13907	0.0125581	0.110981
Bcin01g09450.1	1	197.834	1085	2182.5	1.53137e-43	2	23.8376	985	1541.52	1.76613e-05	12	75.2853	781	1175.66	1.72352e-10	96	568.372	989	1614.13	3.17979e-67	2	48.7787	987	1565.35	1.73571e-10	192	290.566	793	1250.95	3.19799e-05	NA	NA	1086	2380.34	NA	0.189616	0.0162732	0.0969366
Bcin01g09470.1	1	0.110355	1085	1591.87	0.778039	2	18.9705	985	1380.6	0.000174053	12	52.4561	781	1077.26	1.58048e-06	96	179.321	989	1412.55	6.72001e-07	2	12.9773	987	1399.57	0.00301457	192	250.883	793	1129.72	0.00603272	NA	NA	1086	1591.98	NA	0.1005	0.00727314	0.140608
Bcin01g09480.1	1	178.892	1085	1811.76	1.69651e-39	2	3.57917	985	1582.62	0.20259	12	26.2493	781	1262.78	0.0151915	96	191.61	989	1620.15	3.16996e-08	2	33.9476	987	1586.2	1.85415e-07	192	293.593	793	1289.03	2.03631e-05	NA	NA	1086	1990.65	NA	0.0864585	0.0153179	0.132476
Bcin01g09490.1	1	195.916	1085	2414.48	3.89966e-43	2	243.946	985	1527.96	2.30233e-51	12	169.33	781	1140.16	3.45205e-28	96	513.057	989	1901.42	2.02096e-57	2	129.511	987	1771.91	3.70029e-27	192	218.479	793	1309.49	0.13331	NA	NA	1086	2610.39	NA	0.15772	0.0398134	0.0671629
Bcin01g09500.1	1	22.257	1085	2008.17	6.03154e-06	2	40.1086	985	1591.19	7.88713e-09	12	35.8542	781	1287.86	0.000684482	96	309.807	989	1698.37	5.14522e-24	2	67.0672	987	1631.3	3.11262e-14	192	267.476	793	1323.72	0.000801088	NA	NA	1086	2030.43	NA	0.128695	0.0278599	0.11111
Bcin01g09510.1	1	138.411	1085	1858.56	7.87171e-31	2	47.2886	985	1449.18	2.57178e-10	12	35.7393	781	1228.64	0.000712172	96	330.617	989	1527.95	3.56678e-27	2	31.4786	987	1496.47	5.91848e-07	192	184.796	793	1264.38	0.738685	NA	NA	1086	1996.97	NA	0.140147	0.0133437	0.0783344
Bcin01g09520.1	1	0.889569	1085	1159.34	0.406087	2	2.1719	985	1021.55	0.382675	12	4.71704	781	865.534	0.968333	96	128.408	989	1030.93	0.0162891	2	7.20822	987	1023.72	0.0409122	192	151.302	793	870.251	1	NA	NA	1086	1160.23	NA	0.0990922	0.00556255	0.116759
Bcin01g09530.1	1	3.37411	1085	2226.97	0.0918118	2	61.2616	985	1578.35	3.18622e-13	12	34.9359	781	1198.52	0.000936113	96	579.223	989	1647.75	3.55476e-69	2	8.13736	987	1639.61	0.0270453	192	344.892	793	1233.46	2.83891e-09	NA	NA	1086	2230.34	NA	0.205566	0.00288794	0.122402
Bcin01g09540.1	1	98.8637	1085	2860	2.17616e-22	2	390.495	985	1611.04	4.96195e-82	12	239.741	781	1150.38	5.62392e-42	96	830.877	989	2029.12	4.2953e-116	2	27.5893	987	2001.53	3.62513e-06	192	220.915	793	1390.12	0.110573	NA	NA	1086	2958.86	NA	0.217659	0.00722738	0.0578717
Bcin01g09550.1	1	31.054	1085	2088.55	7.66874e-08	2	4.00862	985	1515.6	0.167431	12	57.0423	781	1214.27	2.66069e-07	96	456.325	989	1632.23	1.26619e-47	2	112.621	987	1519.6	1.20529e-23	192	244.28	793	1271.32	0.0125024	NA	NA	1086	2119.6	NA	0.169729	0.041889	0.0908595
Bcin01g09560.1	1	137.79	1085	1985.43	1.06825e-30	2	16.5909	985	1520.63	0.000526772	12	59.1412	781	1168.45	1.15799e-07	96	435.416	989	1550.01	4.33627e-44	2	12.7931	987	1537.22	0.00328014	192	293.032	793	1227.6	2.21584e-05	NA	NA	1086	2123.22	NA	0.169329	0.00497511	0.113957
Bcin01g09570.1	1	0.631879	1085	2326.16	0.487769	2	292.49	985	1504.7	1.58148e-61	12	140.21	781	1154.66	1.38586e-22	96	410.081	989	1916.08	7.13611e-40	2	118.886	987	1797.19	6.08989e-25	192	209.832	793	1294.87	0.241777	NA	NA	1086	2326.79	NA	0.143598	0.0416303	0.073477
Bcin01g09580.1	1	128.776	1085	1902.48	8.83294e-29	2	49.6711	985	1533.89	8.21974e-11	12	77.4928	781	1187	6.86389e-11	96	312.048	989	1590.43	2.37573e-24	2	6.87132	987	1583.56	0.0476922	192	269.391	793	1264.5	0.000624992	NA	NA	1086	2031.25	NA	0.132776	0.00292375	0.114626
Bcin01g09580.2	1	134.152	1085	1968.36	6.33945e-30	2	52.406	985	1554.54	2.23032e-11	12	73.1745	781	1172.66	4.04924e-10	96	350.947	989	1617.41	2.45235e-30	2	10.4695	987	1606.94	0.00948798	192	308.701	793	1245.83	1.90075e-06	NA	NA	1086	2102.51	NA	0.142434	0.00424911	0.125288
Bcin01g09590.1	1	144.076	1085	2556.15	4.76653e-32	2	82.2399	985	1660.3	1.36189e-17	12	215.637	781	1175.85	3.10185e-37	96	804.614	989	1751.54	4.37206e-111	2	8.99526	987	1742.54	0.0184181	192	268.818	793	1391.48	0.000673834	NA	NA	1086	2700.23	NA	0.228984	0.00255995	0.0765027
Bcin01g09600.1	1	51.6093	1085	2304.21	2.88401e-12	2	65.5291	985	1464.38	4.11545e-14	12	24.9596	781	1200.42	0.0223188	96	455.701	989	1848.51	1.61511e-47	2	318.602	987	1529.91	1.21702e-66	192	238.996	793	1225.38	0.0216368	NA	NA	1086	2355.82	NA	0.145586	0.101786	0.0763537	upf0041 domain-containing [Botrytis cinerea 1]	P:mitochondrial pyruvate transport; C:mitochondrial inner membrane
Bcin01g09610.1	1	131.455	1085	1871.79	2.38911e-29	2	7.56978	985	1552.83	0.0336394	12	17.5571	781	1212.55	0.157978	96	259.568	989	1612.22	8.95542e-17	2	51.8202	987	1560.4	4.12838e-11	192	322.722	793	1230.11	1.82788e-07	NA	NA	1086	2003.25	NA	0.112142	0.0223881	0.139427
Bcin01g09620.1	1	197.446	1085	1952.05	1.85157e-43	2	35.9015	985	1509.52	5.8826e-08	12	67.0537	781	1145.71	4.8641e-09	96	388.233	989	1563.81	2.68616e-36	2	18.3962	987	1545.42	0.000257072	192	296.753	793	1212.76	1.25907e-05	NA	NA	1086	2149.49	NA	0.151884	0.0071969	0.116095
Bcin01g09630.1	1	45.2164	1085	1952.28	6.83304e-11	2	24.8813	985	1466.06	1.08333e-05	12	56.1416	781	1122.06	3.78173e-07	96	426.252	989	1526.03	1.4765e-42	2	35.083	987	1490.94	1.09684e-07	192	287.858	793	1178.2	4.74972e-05	NA	NA	1086	1997.49	NA	0.173355	0.0142682	0.117071
Bcin01g09640.1	1	22.871	1085	1196.86	4.42842e-06	2	47.103	985	897.679	2.80092e-10	12	52.3154	781	639.762	1.66572e-06	96	237.801	989	959.061	7.55145e-14	2	14.279	987	944.782	0.00167435	192	205.602	793	692.078	0.310645	NA	NA	1086	1219.73	NA	0.16157	0.0097016	0.139693
Bcin01g09650.1	1	4.24631	1085	2329.44	0.0568176	2	216.597	985	1454.99	9.65944e-46	12	72.335	781	1153.58	5.70032e-10	96	636.054	989	1693.39	1.62376e-79	2	21.8045	987	1671.58	5.31325e-05	192	229.068	793	1225.92	0.0559198	NA	NA	1086	2333.69	NA	0.212617	0.00728871	0.0765717
Bcin01g09660.1	1	318.754	1085	2065.28	1.9935e-69	2	54.7437	985	1530.06	7.3268e-12	12	81.7858	781	1143.64	1.16825e-11	96	440.924	989	1624.36	5.08069e-45	2	39.5575	987	1584.8	1.3443e-08	192	304.629	793	1225.43	3.67953e-06	NA	NA	1086	2384.04	NA	0.153926	0.0138095	0.106346
Bcin01g09670.1	1	64.7118	1085	2244.52	4.45166e-15	2	165.39	985	1574.24	5.16662e-35	12	165.435	781	1178.15	1.8801e-27	96	463.457	989	1781.06	7.73013e-49	2	41.4249	987	1739.63	5.603e-09	192	230.661	793	1343.58	0.048427	NA	NA	1086	2309.23	NA	0.16469	0.0147204	0.081966
Bcin01g09680.1	1	1.56889	1085	1638.5	0.260457	2	4.5897	985	1383.74	0.12889	12	38.612	781	1109.91	0.000262876	96	229.542	989	1408.96	8.85028e-13	2	20.6311	987	1388.33	9.18807e-05	192	235.214	793	1148.52	0.031407	NA	NA	1086	1640.07	NA	0.121435	0.0109145	0.124436
Bcin01g09690.1	1	2.83154	1085	1876.32	0.124149	2	0.151467	985	1566.11	0.935731	12	59.1574	781	1218.47	1.15133e-07	96	266.124	989	1610.2	1.10527e-17	2	43.943	987	1566.26	1.70921e-09	192	288.479	793	1277.63	4.33371e-05	NA	NA	1086	1879.16	NA	0.121561	0.0200724	0.131772
Bcin01g09710.1	1	0.610394	1085	1910.74	0.49542	2	23.5631	985	1405.13	2.00705e-05	12	27.6758	781	1148.51	0.00982832	96	478.923	989	1431.81	1.71229e-51	2	3.12157	987	1428.69	0.254288	192	228.939	793	1176.19	0.0565497	NA	NA	1086	1911.35	NA	0.200102	0.00130425	0.0956546
Bcin01g09720.1	1	34.7317	1085	2004.88	1.24494e-08	2	7.1774	985	1468.45	0.0402064	12	54.1685	781	1158.99	8.15389e-07	96	500.846	989	1504.04	2.74545e-55	2	28.404	987	1475.63	2.4815e-06	192	255.297	793	1213.16	0.00361674	NA	NA	1086	2039.61	NA	0.194968	0.011057	0.0993812
Bcin01g09730.1	1	55.2347	1085	2012.46	4.81829e-13	2	82.7721	985	1512.51	1.05149e-17	12	73.006	781	1193.43	4.33979e-10	96	384.388	989	1628.08	1.13304e-35	2	32.7938	987	1595.28	3.19907e-07	192	246.075	793	1266.44	0.0103452	NA	NA	1086	2067.7	NA	0.154691	0.0131973	0.0990289
Bcin01g09740.1	1	45.9751	1085	2132.48	4.69163e-11	2	33.5264	985	1636.71	1.82416e-07	12	153.002	781	1212.41	4.95807e-25	96	428.701	989	1703.78	5.76249e-43	2	33.5447	987	1670.23	2.24223e-07	192	271.298	793	1365.41	0.000485692	NA	NA	1086	2178.45	NA	0.162344	0.012703	0.102737
Bcin01g09750.1	1	1.31592	1085	1552.29	0.305046	2	13.1678	985	1343.11	0.00258557	12	24.8686	781	1110.07	0.0229254	96	189.182	989	1363.1	5.89029e-08	2	6.82726	987	1356.28	0.0486073	192	208.174	793	1134.94	0.267373	NA	NA	1086	1553.6	NA	0.108128	0.00390216	0.118983
Bcin01g09760.1	1	4.90739	1085	1568.93	0.0398832	2	5.93798	985	1375.91	0.0703008	12	34.278	781	1127.64	0.00117045	96	175.156	989	1393.77	1.80437e-06	2	11.9257	987	1381.85	0.00490221	192	213.991	793	1161.92	0.184078	NA	NA	1086	1573.84	NA	0.0994687	0.00677245	0.121522
Bcin01g09770.1	1	1.10146	1085	2207.92	0.351132	2	5.40661	985	1472.78	0.0889924	12	53.6727	781	1197.93	9.85816e-07	96	711.727	989	1496.2	1.51086e-93	2	18.0121	987	1478.18	0.000306549	192	221.179	793	1251.6	0.108319	NA	NA	1086	2209.02	NA	0.242186	0.00612914	0.0752627
Bcin01g09780.1	1	199.063	1085	2290.62	8.32199e-44	2	168.221	985	1596.8	1.34063e-35	12	190.084	781	1171.53	3.19152e-32	96	494.923	989	1795.7	2.94211e-54	2	30.6797	987	1765.02	8.5959e-07	192	235.182	793	1361.61	0.0315065	NA	NA	1086	2489.68	NA	0.164138	0.0101747	0.0779965
Bcin01g09790.1	1	196.933	1085	1973	2.37702e-43	2	50.8082	985	1512.95	4.76858e-11	12	41.0644	781	1210.53	0.00011026	96	366.706	989	1606.3	7.89285e-33	2	42.544	987	1563.75	3.30046e-09	192	261.353	793	1251.59	0.00174188	NA	NA	1086	2169.94	NA	0.142179	0.0164951	0.101331
Bcin01g09800.1	1	1.53867	1085	1871.21	0.265276	2	29.274	985	1553.15	1.36823e-06	12	33.0793	781	1255.28	0.00174271	96	260.359	989	1610.85	6.96358e-17	2	28.428	987	1582.42	2.45482e-06	192	264.786	793	1288.36	0.00113881	NA	NA	1086	1872.75	NA	0.120451	0.0131517	0.122499
Bcin01g09810.1	1	0.791536	1085	2017.87	0.434691	2	10.1346	985	1481.99	0.0104309	12	42.2489	781	1214.9	7.20814e-05	96	412.315	989	1605.55	3.04784e-40	2	113.431	987	1492.12	8.25135e-24	192	224.838	793	1257.15	0.0804397	NA	NA	1086	2018.66	NA	0.162048	0.0445806	0.0883657
Bcin01g09830.1	1	302.494	1085	1834.8	6.34233e-66	2	59.2699	985	1057.92	8.26096e-13	12	94.3411	781	742.651	6.01847e-14	96	678.098	989	1156.7	2.83366e-87	2	39.5138	987	1117.19	1.37243e-08	192	220.927	793	836.992	0.11049	NA	NA	1086	2137.29	NA	0.23752	0.0138407	0.0773849
Bcin01g09840.1	1	41.0235	1085	2003.2	5.49552e-10	2	23.0641	985	1517.03	2.5286e-05	12	33.0516	781	1230.45	0.00175842	96	447.835	989	1555.36	3.46964e-46	2	15.2669	987	1540.09	0.00107096	192	253.533	793	1263.5	0.00446068	NA	NA	1086	2044.22	NA	0.178611	0.00608894	0.101117
Bcin01g09850.1	1	5.3706	1085	783.534	0.0311581	2	1.54381	985	671.888	0.50553	12	8.99972	781	507.753	0.722008	96	108.226	989	675.308	0.189847	2	1.87573	987	673.432	0.439296	192	155.136	793	516.753	1	NA	NA	1086	788.905	NA	0.120384	0.00208645	0.172563
Bcin01g09860.1	1	16.3041	1085	1986.54	0.000118601	2	27.4784	985	1544.81	3.19322e-06	12	18.5871	781	1274.04	0.123595	96	380.151	989	1606.39	5.49696e-35	2	34.1011	987	1572.29	1.72767e-07	192	252.181	793	1292.63	0.00520789	NA	NA	1086	2002.85	NA	0.157276	0.0141083	0.104332
Bcin01g09870.1	1	30.3063	1085	1881.14	1.11026e-07	2	1.90175	985	1586.76	0.432213	12	66.9512	781	1252.07	5.07278e-09	96	279.638	989	1601.5	1.35962e-19	2	12.8342	987	1588.66	0.00321688	192	267.746	793	1319.02	0.000773603	NA	NA	1086	1911.44	NA	0.126882	0.00582337	0.121486
Bcin01g09880.1	1	0.187198	1085	812.454	0.712372	2	3.3252	985	687.985	0.227623	12	15.9881	781	530.89	0.22343	96	115.245	989	697.209	0.0914545	2	5.89851	987	691.311	0.0737018	192	141.107	793	546.878	1	NA	NA	1086	812.641	NA	0.123417	0.00631677	0.151113
Bcin01g09890.1	1	1.26151	1085	1716.42	0.315952	2	0.0217521	985	1462.29	0.990249	12	26.1675	781	1205.63	0.0155777	96	209.468	989	1506.95	2.72676e-10	2	44.6362	987	1462.32	1.23387e-09	192	230.5	793	1231.79	0.0491195	NA	NA	1086	1717.68	NA	0.106232	0.0226374	0.116899
Bcin01g09900.1	1	108.388	1085	1976.22	2.00381e-24	2	16.7515	985	1516.4	0.00048857	12	42.4586	781	1205.6	6.67355e-05	96	434.764	989	1541.46	5.56249e-44	2	8.30768	987	1533.15	0.0250509	192	268.333	793	1248.06	0.00071823	NA	NA	1086	2084.61	NA	0.172001	0.00328668	0.106158
Bcin01g09910.1	1	0.599023	1085	2493.13	0.499659	2	38.7459	985	1558.3	1.5065e-08	12	99.7001	781	1171.01	6.20311e-15	96	797.208	989	1695.93	1.11582e-109	2	98.8773	987	1597.05	8.71965e-21	192	287.596	793	1270.71	4.92417e-05	NA	NA	1086	2493.73	NA	0.235177	0.0291689	0.0848411
Bcin01g09920.1	1	6.78812	1085	1166.59	0.0147705	2	21.2121	985	955.356	6.05848e-05	12	29.1653	781	743.329	0.00616062	96	176.137	989	990.456	1.43338e-06	2	13.8874	987	976.568	0.00199827	192	182.862	793	772.494	0.77738	NA	NA	1086	1173.38	NA	0.129189	0.0101858	0.134122
Bcin01g09940.1	1	119.173	1085	1991.21	9.96903e-27	2	7.36514	985	1498.03	0.0369513	12	43.2763	781	1243.87	4.96065e-05	96	456.518	989	1534.69	1.17548e-47	2	29.2922	987	1505.4	1.64398e-06	192	210.884	793	1287.15	0.226588	NA	NA	1086	2110.38	NA	0.175841	0.0112828	0.0812284
Bcin01g09950.1	1	103.971	1085	2500.77	1.75479e-23	2	125.016	985	1652.85	1.55029e-26	12	133.447	781	1137.48	2.7429e-21	96	631.675	989	1869.1	1.03786e-78	2	91.2333	987	1777.86	3.35924e-19	192	381.916	793	1270.93	1.05439e-12	NA	NA	1086	2604.74	NA	0.189826	0.0274167	0.114771
Bcin01g09960.1	1	0.128316	1085	1504.9	0.761872	2	2.31311	985	1324.35	0.359264	12	37.7587	781	1047.63	0.00035423	96	172.615	989	1332.29	3.26057e-06	2	5.6235	987	1326.66	0.083167	192	238.958	793	1085.39	0.0217012	NA	NA	1086	1505.03	NA	0.102547	0.00334082	0.141961
Bcin01g09970.1	1	30.4685	1085	1818.69	1.02583e-07	2	17.1029	985	1361.69	0.000415527	12	40.054	781	1037.01	0.000158192	96	433.427	989	1385.27	9.3305e-44	2	6.4758	987	1378.79	0.0570117	192	284.623	793	1077.06	7.60003e-05	NA	NA	1086	1849.16	NA	0.189347	0.00282902	0.12434
Bcin01g09980.1	1	23.4512	1085	1909.88	3.32357e-06	2	7.87173	985	1386.3	0.0294232	12	40.5809	781	1050.17	0.00013112	96	461.095	989	1448.78	1.95158e-48	2	54.6139	987	1394.17	1.1212e-11	192	295.546	793	1090.75	1.50702e-05	NA	NA	1086	1933.33	NA	0.188276	0.0223001	0.120678
Bcin01g09990.1	1	12.8639	1085	1388.58	0.000672575	2	4.37347	985	1228.7	0.142137	12	21.8133	781	968.45	0.0538705	96	151.95	989	1236.63	0.000274667	2	3.55494	987	1233.07	0.20931	192	238.437	793	990.263	0.0228646	NA	NA	1086	1401.44	NA	0.0975946	0.00228328	0.153144
Bcin01g10000.1	1	2.63468e-05	1085	1262.79	0.996871	2	4.97024	985	1129.9	0.108349	12	12.2582	781	927.141	0.457127	96	111.789	989	1151	0.133242	2	16.1313	987	1134.87	0.000721549	192	190.501	793	939.4	0.620866	NA	NA	1086	1262.79	NA	0.0803823	0.0115993	0.136981
Bcin01g10010.1	1	0.0275049	1085	2202	0.889294	2	154.699	985	1464.56	9.19545e-33	12	78.248	781	1177.68	5.0162e-11	96	562.881	989	1639.12	3.0552e-66	2	19.8578	987	1619.26	0.000131822	192	208.637	793	1255.93	0.260363	NA	NA	1086	2202.03	NA	0.202128	0.00713088	0.0749208
Bcin01g10020.1	1	118.388	1085	1605.84	1.47391e-26	2	37.2156	985	1222.86	3.12361e-08	12	68.578	781	947.141	2.63287e-09	96	337.501	989	1268.34	3.08507e-28	2	8.25823	987	1260.08	0.0255987	192	207.142	793	1015.72	0.284252	NA	NA	1086	1724.22	NA	0.163045	0.00398952	0.10007
Bcin01g10040.1	1	0.406524	1085	1983.95	0.580515	2	32.6489	985	1465.04	2.77072e-07	12	64.8028	781	1196.31	1.20943e-08	96	416.578	989	1567.37	5.99209e-41	2	69.6861	987	1497.69	9.02302e-15	192	203.93	793	1261.11	0.340802	NA	NA	1086	1984.36	NA	0.168613	0.0282059	0.0825419
Bcin01g10050.1	1	29.4203	1085	2014.27	1.71163e-07	2	3.84297	985	1619.82	0.180225	12	42.3322	781	1274.22	6.98953e-05	96	327.672	989	1686.6	1.00636e-26	2	62.9334	987	1623.66	2.23676e-13	192	303.265	793	1316.56	4.57095e-06	NA	NA	1086	2043.69	NA	0.134607	0.0258528	0.12458
Bcin01g10060.1	1	32.9482	1085	2146.33	3.00303e-08	2	71.862	985	1623.14	1.98902e-15	12	43.8586	781	1262.27	4.01034e-05	96	364.782	989	1781.55	1.59878e-32	2	86.5521	987	1695	3.177e-18	192	317.007	793	1306.13	4.82076e-07	NA	NA	1086	2179.28	NA	0.138668	0.0329019	0.120507
Bcin01g10070.1	1	31.5378	1085	1575.09	6.02487e-08	2	1.74283	985	1386.73	0.463158	12	12.051	781	1071.9	0.473244	96	183.481	989	1391.61	2.44096e-07	2	3.13985	987	1388.47	0.252238	192	302.777	793	1083.95	4.91621e-06	NA	NA	1086	1606.63	NA	0.102318	0.00175093	0.168842
Bcin01g10080.1	1	36.3475	1085	1456.06	5.58153e-09	2	13.0713	985	1289.38	0.00270468	12	30.16	781	1042.94	0.00449668	96	149.898	989	1306.17	0.00040963	2	3.71607	987	1302.45	0.19456	192	216.28	793	1073.1	0.156537	NA	NA	1086	1492.41	NA	0.0910665	0.0022576	0.131395
Bcin01g10090.1	1	51.3178	1085	1877.5	3.33655e-12	2	1.17635	985	1471.17	0.59413	12	59.4005	781	1163.6	1.04489e-07	96	328.693	989	1548.81	7.03294e-27	2	76.4632	987	1472.34	3.70483e-16	192	248.171	793	1223	0.0082222	NA	NA	1086	1928.82	NA	0.14083	0.032761	0.10633
Bcin01g10100.1	1	67.6628	1085	2013.68	1.03923e-15	2	0.612535	985	1505.99	0.76264	12	51.9902	781	1153.76	1.88608e-06	96	496.806	989	1516.88	1.38264e-54	2	10.2787	987	1506.6	0.0103337	192	300.238	793	1205.75	7.32856e-06	NA	NA	1086	2081.34	NA	0.191933	0.00397101	0.115992
Bcin01g10110.1	1	10.463	1085	1788.09	0.00225777	2	9.40029	985	1498.21	0.0146603	12	69.7838	781	1176.5	1.62382e-09	96	261.063	989	1527.03	5.57661e-17	2	19.4144	987	1507.61	0.000161116	192	251.934	793	1246.28	0.00535646	NA	NA	1086	1798.55	NA	0.12557	0.0093382	0.121178
Bcin01g10110.2	1	6.50243	1085	1815.26	0.0171616	2	11.3391	985	1504.42	0.00602304	12	54.9648	781	1180.95	5.99694e-07	96	265.692	989	1549.57	1.26957e-17	2	33.8152	987	1515.76	1.97362e-07	192	268.499	793	1235.92	0.000703458	NA	NA	1086	1821.77	NA	0.125251	0.015941	0.126574
Bcin01g10110.3	1	19.2051	1085	1703.54	2.76775e-05	2	5.15408	985	1479.97	0.0996286	12	76.9033	781	1121.87	8.80219e-11	96	200.094	989	1503.45	3.45655e-09	2	18.3285	987	1485.12	0.000264824	192	281.196	793	1198.77	0.000124404	NA	NA	1086	1722.75	NA	0.103079	0.00944201	0.144859
Bcin01g10110.4	1	2.14971	1085	1733.45	0.183514	2	18.0859	985	1452.25	0.000262332	12	49.9473	781	1106.14	4.1125e-06	96	239.817	989	1493.64	4.1072e-14	2	23.3021	987	1470.33	2.65126e-05	192	296.165	793	1156.08	1.37499e-05	NA	NA	1086	1735.6	NA	0.119985	0.0116585	0.148177
Bcin01g10120.1	1	10.3458	1085	2123.16	0.00239377	2	100.003	985	1611.58	2.57941e-21	12	108.193	781	1201.24	1.65692e-16	96	402.224	989	1720.93	1.39795e-38	2	9.34924	987	1711.59	0.0156876	192	302.146	793	1309.44	5.41982e-06	NA	NA	1086	2133.51	NA	0.15804	0.00367346	0.118718
Bcin01g10130.1	1	0.316701	1085	2117.5	0.627463	2	6.24535	985	928.268	0.0612065	12	37.8737	781	692.152	0.000340549	96	1171.08	989	946.422	1.48387e-182	2	11.9083	987	934.513	0.00494001	192	198.242	793	730.026	0.454337	NA	NA	1086	2117.82	NA	0.354786	0.0036077	0.0600588
Bcin01g10150.1	1	2.18167	1085	4239.97	0.180062	2	2.45477	985	1305.48	0.336977	12	19.0364	781	863.1	0.110732	96	2807.26	989	1432.71	0	2	124.779	987	1307.93	3.61716e-26	192	423.344	793	882.136	3.31518e-17	NA	NA	1086	4242.15	NA	0.3913	0.0173928	0.0590093		F:phosphatidylserine decarboxylase activity; P:phospholipid biosynthetic process
Bcin01g10160.1	1	1.63231	1085	1882.25	0.250388	2	75.2375	985	1529.43	3.93276e-16	12	83.1118	781	1177.77	6.77018e-12	96	244.677	989	1637.57	9.34631e-15	2	32.9095	987	1604.66	3.02608e-07	192	268.547	793	1260.88	0.000698966	NA	NA	1086	1883.88	NA	0.113199	0.0152255	0.124243
Bcin01g10170.1	1	41.5451	1085	2097.53	4.24507e-10	2	98.0677	985	1505.77	6.50816e-21	12	110.485	781	1129.71	6.1775e-17	96	490.005	989	1607.52	2.08636e-53	2	3.68763	987	1603.84	0.197161	192	265.577	793	1240.19	0.00102984	NA	NA	1086	2139.07	NA	0.186118	0.00140066	0.100874
Bcin01g10180.1	1	1.17386	1085	2298.03	0.334576	2	51.3114	985	1549.84	3.75574e-11	12	152.253	781	1167.45	6.87716e-25	96	657.003	989	1641.03	2.26352e-83	2	39.875	987	1601.16	1.15805e-08	192	230.138	793	1319.71	0.0507316	NA	NA	1086	2299.21	NA	0.219287	0.013309	0.0768127
Bcin01g10230.1	1	3.1345	1085	822.725	0.104637	2	5.24276	985	721.949	0.0956983	12	15.2603	781	524.363	0.261086	96	92.3173	989	730.408	0.589979	2	3.21623	987	727.192	0.243645	192	182.326	793	539.623	0.787079	NA	NA	1086	825.86	NA	0.100193	0.00349062	0.197881
Bcin01g10240.1	1	6.16096	1085	1765.37	0.0205264	2	2.13053	985	1455.28	0.389626	12	20.8003	781	1164.32	0.070558	96	301.973	989	1463.39	7.55001e-23	2	5.98361	987	1457.41	0.070965	192	270.159	793	1185.12	0.000562933	NA	NA	1086	1771.53	NA	0.145215	0.00287745	0.129916
Bcin01g10240.2	1	3.08117e-06	1085	1575.68	0.999138	2	4.70704	985	1336.32	0.122151	12	13.3292	781	1114.19	0.379546	96	225.049	989	1350.63	3.29977e-12	2	9.59814	987	1341.03	0.0140168	192	208.804	793	1127.52	0.257784	NA	NA	1086	1575.68	NA	0.124314	0.0053019	0.115341
Bcin01g10240.3	1	0.13797	1085	1671.59	0.753485	2	2.53402	985	1408.02	0.325336	12	16.7939	781	1194.41	0.187532	96	252.191	989	1419.4	9.11407e-16	2	8.85228	987	1410.55	0.0196743	192	196.814	793	1211.2	0.484103	NA	NA	1086	1671.73	NA	0.130481	0.00458009	0.10183
Bcin01g10250.1	1	9.8652	1085	1555.72	0.00305479	2	49.3051	985	1283.98	9.75434e-11	12	39.1118	781	1049.87	0.000221319	96	215.403	989	1340.32	5.19383e-11	2	7.03063	987	1333.29	0.0443237	192	194.999	793	1088.98	0.523375	NA	NA	1086	1565.59	NA	0.12047	0.00393207	0.109059
Bcin01g10250.2	1	13.3532	1085	1530.21	0.000525786	2	17.116	985	1306.41	0.000413067	12	39.8623	781	1070.93	0.000169229	96	206.478	989	1323.73	6.19009e-10	2	0.202215	987	1323.53	0.916171	192	195.616	793	1110.8	0.50999	NA	NA	1086	1543.56	NA	0.117971	0.000115536	0.111765
Bcin01g10280.1	1	9.42665	1085	1577.97	0.00382107	2	0.359995	985	1397.12	0.852334	12	22.7295	781	1150.17	0.0419354	96	170.833	989	1407.13	4.90242e-06	2	9.65108	987	1397.48	0.0136934	192	224.225	793	1172.9	0.0847162	NA	NA	1086	1587.39	NA	0.0966318	0.00545913	0.126833
Bcin01g10280.2	1	11.698	1085	1389.3	0.0012112	2	1.94312	985	1223.51	0.424233	12	24.8828	781	1033.51	0.0228255	96	156.615	989	1232.69	0.000107515	2	7.23458	987	1225.45	0.0404158	192	165.115	793	1058.39	0.998885	NA	NA	1086	1401	NA	0.100083	0.00462318	0.105515
Bcin01g10290.1	1	29.9606	1085	1569.14	1.3158e-07	2	6.72162	985	1350.52	0.0493978	12	12.9944	781	1111.72	0.403286	96	194.921	989	1374.22	1.34586e-08	2	16.9792	987	1357.24	0.000491324	192	225.809	793	1124.71	0.0740742	NA	NA	1086	1599.1	NA	0.107631	0.00937555	0.124687
Bcin01g10300.1	1	1.53287	1085	3306.61	0.2661	2	211.106	985	1755.75	1.39468e-44	12	80.7591	781	1130.29	1.79054e-11	96	1209.9	989	2096.71	2.91544e-190	2	129.854	987	1966.85	3.15027e-27	192	544.696	793	1211.05	1.20845e-32	NA	NA	1086	3308.14	NA	0.260311	0.0279384	0.117192
Bcin01g10310.1	1	390.779	1085	1925.56	7.53791e-85	2	67.734	985	1455.81	1.43677e-14	12	107.305	781	1154.4	2.4206e-16	96	401.724	989	1523.83	1.68843e-38	2	0.286656	987	1523.55	0.882244	192	194.11	793	1261.7	0.543012	NA	NA	1086	2316.34	NA	0.147782	0.000105452	0.0714075
Bcin01g10320.1	1	148.473	1085	1970.18	5.493e-33	2	20.8833	985	1517.01	7.07219e-05	12	30.4077	781	1194.15	0.00415666	96	398.221	989	1571.95	6.33349e-38	2	34.0577	987	1537.9	1.76063e-07	192	292.46	793	1224.55	2.41167e-05	NA	NA	1086	2118.65	NA	0.156108	0.0133511	0.114648
Bcin01g10320.2	1	165.083	1085	1888.71	1.51095e-36	2	33.8843	985	1515.43	1.53348e-07	12	22.8979	781	1230.86	0.040015	96	322.398	989	1566.31	6.44782e-26	2	16.9956	987	1549.31	0.000487814	192	261.669	793	1253.76	0.00167491	NA	NA	1086	2053.79	NA	0.134715	0.00710165	0.109339
Bcin01g10330.1	1	263.324	1085	2078.67	1.45108e-57	2	47.1222	985	1538.79	2.77918e-10	12	48.9421	781	1176.74	6.01978e-06	96	488.776	989	1589.89	3.40799e-53	2	3.97317	987	1585.92	0.173467	192	313.112	793	1225.68	9.24482e-07	NA	NA	1086	2341.99	NA	0.172424	0.0014016	0.110455
Bcin01g10340.1	1	122.092	1085	1861.11	2.36785e-27	2	10.3344	985	1431.85	0.00953554	12	12.8161	781	1186.47	0.415732	96	392.643	989	1468.46	5.16098e-37	2	26.2779	987	1442.18	6.67727e-06	192	232.565	793	1199.29	0.0407262	NA	NA	1086	1983.2	NA	0.163457	0.0109395	0.0968164
Bcin01g10350.1	1	2.15996	1085	1767.49	0.18242	2	5.40523	985	1531.55	0.0890409	12	17.4976	781	1273.29	0.160037	96	216.641	989	1550.85	3.66205e-11	2	13.8939	987	1536.96	0.00199262	192	240.761	793	1290.79	0.0180637	NA	NA	1086	1769.65	NA	0.10831	0.00694632	0.120369
Bcin01g10360.1	1	2.19407	1085	1858.33	0.178842	2	8.3134	985	1556.26	0.0241254	12	12.1824	781	1248.41	0.463176	96	265.36	989	1592.97	1.41212e-17	2	28.3947	987	1564.58	2.4921e-06	192	295.673	793	1260.59	1.47734e-05	NA	NA	1086	1860.53	NA	0.123178	0.0131806	0.137249
Bcin01g10380.1	1	164.224	1085	2691.99	2.30708e-36	2	9.74303	985	1525.44	0.012499	12	115.657	781	1170.39	6.60407e-18	96	1150.53	989	1541.47	1.72458e-178	2	6.28757	987	1535.18	0.0620362	192	239.387	793	1286.05	0.0208065	NA	NA	1086	2856.22	NA	0.286697	0.00156679	0.0596523
Bcin01g10390.1	1	68.4513	1085	2149.86	7.09404e-16	2	55.3055	985	1535.51	5.58352e-12	12	97.0372	781	1168.29	1.91679e-14	96	491.537	989	1658.33	1.13575e-53	2	67.5165	987	1590.81	2.53615e-14	192	270.179	793	1265.33	0.000561341	NA	NA	1086	2218.32	NA	0.176979	0.0243095	0.0972788
Bcin01g10400.1	1	1.02288	1085	1809.91	0.370454	2	1.22291	985	1537.87	0.58206	12	28.6165	781	1199.56	0.007359	96	244.157	989	1565.75	1.09548e-14	2	26.6548	987	1539.1	5.59075e-06	192	309.694	793	1228.18	1.6107e-06	NA	NA	1086	1810.93	NA	0.117285	0.0128041	0.148767
Bcin01g10410.1	1	0.0174025	1085	1592.79	0.912444	2	14.4918	985	1173.91	0.00139638	12	44.6982	781	922.277	2.94662e-05	96	390.83	989	1201.96	1.01642e-36	2	13.5519	987	1188.41	0.00232482	192	206.939	793	966.975	0.28764	NA	NA	1086	1592.81	NA	0.19569	0.0067855	0.103615
Bcin01g10420.1	1	137.524	1085	1693.51	1.21632e-30	2	15.4652	985	1355.37	0.000887504	12	78.0063	781	1033.06	5.53574e-11	96	307.035	989	1386.47	1.33614e-23	2	15.6349	987	1370.84	0.000907316	192	244.307	793	1111.06	0.0124717	NA	NA	1086	1831.03	NA	0.142562	0.00725956	0.113436
Bcin01g10430.1	1	0.443628	1085	1410.49	0.562715	2	3.88776	985	1148.73	0.176774	12	15.7867	781	947.217	0.233611	96	234.674	989	1175.82	1.93129e-13	2	23.1952	987	1152.62	2.78226e-05	192	185.731	793	963.003	0.72075	NA	NA	1086	1410.93	NA	0.140624	0.0138993	0.111296
Bcin01g10440.1	1	6.41905	1085	1041.16	0.0179238	2	0.35981	985	861.072	0.852334	12	17.3959	781	672.201	0.163887	96	164.318	989	876.842	2.09939e-05	2	15.4101	987	861.432	0.00100406	192	171.476	793	689.597	0.947847	NA	NA	1086	1047.58	NA	0.133885	0.012556	0.139717
Bcin01g10450.1	1	4.15742	1085	1729.02	0.0596011	2	23.1349	985	1476.64	2.45023e-05	12	59.1667	781	1174.4	1.14747e-07	96	228.782	989	1500.24	1.10681e-12	2	0.46607	987	1499.77	0.815853	192	243.073	793	1233.56	0.0141582	NA	NA	1086	1733.17	NA	0.116581	0.000237497	0.123864
Bcin01g10460.1	1	8.78857	1085	1584.64	0.0052651	2	11.7246	985	1330.31	0.00504105	12	18.3999	781	1085.73	0.129367	96	193.285	989	1391.35	2.0571e-08	2	49.315	987	1342.04	1.34721e-10	192	226.181	793	1104.13	0.0718569	NA	NA	1086	1593.43	NA	0.105274	0.0268596	0.123191
Bcin01g10470.1	1	52.5258	1085	2740.76	1.83107e-12	2	120.777	985	1601.82	1.18309e-25	12	75.0708	781	1197.21	1.88251e-10	96	1013.3	989	1727.46	1.93122e-151	2	4.86972	987	1722.59	0.116479	192	329.534	793	1272.28	5.35457e-08	NA	NA	1086	2793.29	NA	0.265856	0.00127766	0.0864589
Bcin01g10480.1	1	5.53501	1085	1921.28	0.0285656	2	24.0256	985	1618.57	1.61506e-05	12	30.1513	781	1224.02	0.00450868	96	267.438	989	1653.84	7.2507e-18	2	11.2456	987	1642.6	0.00668606	192	364.399	793	1254.17	5.23642e-11	NA	NA	1086	1926.82	NA	0.12126	0.00509888	0.165223
Bcin01g10490.1	1	71.5129	1085	1808.69	1.56601e-16	2	23.0763	985	1464.12	2.51533e-05	12	59.0213	781	1150.5	1.21383e-07	96	313.757	989	1494.93	1.31465e-24	2	7.74126	987	1487.19	0.032303	192	254.594	793	1209.52	0.00393325	NA	NA	1086	1880.2	NA	0.142506	0.00351603	0.115635
Bcin01g10500.1	1	43.0526	1085	2279.95	2.00785e-10	2	61.5735	985	1564.5	2.74504e-13	12	153.452	781	1153.37	4.06103e-25	96	541.039	989	1738.91	2.36053e-62	2	112.835	987	1626.07	1.0942e-23	192	257.677	793	1306.82	0.00271513	NA	NA	1086	2323	NA	0.181747	0.0379038	0.0865597
Bcin01g10510.1	1	5.31525	1085	1160.58	0.0320739	2	0.0992343	985	1008.56	0.956643	12	14.4597	781	816.976	0.306678	96	142.656	989	1017.92	0.00157424	2	9.2662	987	1008.66	0.0162818	192	177.122	793	831.436	0.873553	NA	NA	1086	1165.89	NA	0.108252	0.00703148	0.134406
Bcin01g10510.2	1	8.59121	1085	1137.25	0.00580963	2	3.80818	985	997.199	0.183096	12	16.9088	781	815.551	0.182885	96	129.621	989	1007.63	0.0135926	2	6.62171	987	1001.01	0.0532923	192	164.739	793	832.46	1	NA	NA	1086	1145.84	NA	0.101102	0.0051648	0.128493
Bcin01g10520.1	1	10.6193	1085	2024.43	0.00208756	2	57.7785	985	1573.79	1.70974e-12	12	96.6202	781	1242.65	2.28965e-14	96	365.17	989	1659.26	1.38667e-32	2	27.6957	987	1631.57	3.44519e-06	192	234.522	793	1339.27	0.0336318	NA	NA	1086	2035.05	NA	0.150404	0.0114072	0.0965937
Bcin01g10530.1	1	39.826	1085	2683.23	9.925e-10	2	262.07	985	1606.55	4.10079e-55	12	187.699	781	1177.66	9.34478e-32	96	675.01	989	2008.23	1.04894e-86	2	139.603	987	1868.62	3.17005e-29	192	241.192	793	1365.36	0.0172598	NA	NA	1086	2723.06	NA	0.190806	0.0394618	0.0681782
Bcin01g10540.1	1	14.1393	1085	1632.44	0.000353764	2	11.8597	985	1427.25	0.00474084	12	30.8063	781	1177.64	0.00365963	96	175.771	989	1456.67	1.56256e-06	2	17.5636	987	1439.11	0.000376619	192	218.798	793	1208.45	0.130113	NA	NA	1086	1646.58	NA	0.0955322	0.00954585	0.118917
Bcin01g10550.1	1	12.5158	1085	1487.12	0.00080034	2	7.60171	985	1360.62	0.0331962	12	24.0686	781	1089.97	0.0287983	96	113.185	989	1373.94	0.114824	2	5.72106	987	1368.22	0.0796942	192	246.577	793	1114.04	0.00980859	NA	NA	1086	1499.64	NA	0.0699301	0.00353469	0.152345
Bcin01g10560.1	1	25.4547	1085	1915.52	1.22409e-06	2	26.7993	985	1423.9	4.38089e-06	12	18.588	781	1165.99	0.12358	96	359.071	989	1556.44	1.28526e-31	2	105.743	987	1450.7	3.36784e-22	192	239.322	793	1184.58	0.020942	NA	NA	1086	1940.97	NA	0.149253	0.0439537	0.0994778
Bcin01g10570.1	1	0.000902729	1085	1461.96	0.98036	2	13.7659	985	1263.73	0.00195583	12	12.0572	781	1057.35	0.472884	96	183.259	989	1278.7	2.57797e-07	2	1.20299	987	1277.49	0.589931	192	194.324	793	1069.4	0.538284	NA	NA	1086	1461.96	NA	0.111308	0.000730668	0.118028
Bcin01g10600.1	1	7.44041	1085	1954.49	0.010513	2	16.8812	985	1461.53	0.000459977	12	68.1917	781	1181.43	3.07379e-09	96	413.594	989	1540.9	1.8691e-40	2	62.4937	987	1478.41	2.74681e-13	192	211.9	793	1249.63	0.211977	NA	NA	1086	1961.93	NA	0.169643	0.025633	0.0869146
Bcin01g10610.1	1	45.4015	1085	1924.01	6.24016e-11	2	5.92498	985	1563.77	0.0706657	12	72.3858	781	1223.31	5.58503e-10	96	312.503	989	1611.51	2.0303e-24	2	41.8152	987	1569.69	4.65403e-09	192	268.07	793	1295.7	0.000742689	NA	NA	1086	1969.41	NA	0.134483	0.0179949	0.115362
Bcin01g10620.1	1	0.204745	1085	767.156	0.699805	2	5.22319	985	637.177	0.0965312	12	14.5363	781	513.14	0.302292	96	101.048	989	666.108	0.347134	2	23.7076	987	642.401	2.1973e-05	192	109.501	793	527.677	1	NA	NA	1086	767.361	NA	0.113268	0.0265745	0.122742
Bcin01g10640.1	1	5.73288	1085	2047	0.0257034	2	30.0958	985	1543.12	9.29963e-07	12	88.8837	781	1216.25	6.01964e-13	96	436.168	989	1610.83	3.24046e-44	2	37.6165	987	1573.22	3.36959e-08	192	237.991	793	1305.13	0.023934	NA	NA	1086	2052.74	NA	0.172636	0.0148887	0.0941971
Bcin01g10650.1	1	0.0126614	1085	1779.44	0.925737	2	22.0133	985	1447.98	4.1563e-05	12	49.6572	781	1126.24	4.59541e-06	96	303.05	989	1476.39	5.22682e-23	2	6.39382	987	1470	0.0591197	192	272.087	793	1175.9	0.000437802	NA	NA	1086	1779.45	NA	0.145077	0.00306086	0.130254
Bcin01g10660.1	1	119.266	1085	1987.22	9.53308e-27	2	8.5558	985	1468.88	0.0215685	12	61.2315	781	1201.69	5.03475e-08	96	407.399	989	1579.82	1.97538e-39	2	102.38	987	1477.44	1.68142e-21	192	205.966	793	1262.92	0.304209	NA	NA	1086	2106.49	NA	0.155718	0.0391321	0.0787252
Bcin01g10670.1	1	3.38032	1085	1689.51	0.0915209	2	56.525	985	1398.95	3.12492e-12	12	37.8375	781	1135.55	0.000344826	96	224.152	989	1465.36	4.2802e-12	2	9.88881	987	1455.47	0.012331	192	225.558	793	1173.39	0.0756642	NA	NA	1086	1692.89	NA	0.116326	0.00513188	0.117055
Bcin01g10680.1	1	1.22656	1085	1971.09	0.322931	2	109.748	985	1454.76	2.39633e-23	12	58.3134	781	1184.46	1.60709e-07	96	398.967	989	1572.12	4.78483e-38	2	7.61544	987	1564.51	0.0341553	192	211.984	793	1242.77	0.21076	NA	NA	1086	1972.31	NA	0.167711	0.00320125	0.0891102
Bcin01g10690.1	1	36.2702	1085	1962.93	5.8011e-09	2	4.43096	985	1589.68	0.138449	12	48.2777	781	1250.62	7.74944e-06	96	360.919	989	1602.01	6.55633e-32	2	7.89775	987	1594.11	0.030108	192	290.789	793	1298.89	3.10179e-05	NA	NA	1086	1999.2	NA	0.152414	0.00333517	0.122798
Bcin01g10700.1	1	53.1094	1085	2336.27	1.37186e-12	2	159.964	985	1600.64	7.16721e-34	12	157.361	781	1175.29	6.83271e-26	96	494.721	989	1841.54	3.18719e-54	2	80.9378	987	1760.61	4.47875e-17	192	267.987	793	1332.66	0.000749797	NA	NA	1086	2389.37	NA	0.166852	0.0272974	0.0903823
Bcin01g10710.1	1	39.3175	1085	2168.97	1.2754e-09	2	67.6363	985	1663.23	1.50512e-14	12	93.608	781	1243.57	8.2158e-14	96	419.287	989	1749.68	2.12429e-41	2	18.8131	987	1730.87	0.000212004	192	326.053	793	1337.18	9.88622e-08	NA	NA	1086	2208.29	NA	0.158437	0.00710897	0.123207
Bcin01g10720.1	1	12.3992	1085	1179.05	0.000849707	2	11.6687	985	1008.7	0.00516927	12	17.9466	781	822.609	0.144248	96	157.176	989	1021.88	9.57512e-05	2	1.50953	987	1020.37	0.515668	192	168.143	793	840.556	0.978201	NA	NA	1086	1191.45	NA	0.116415	0.00111805	0.124538
Bcin01g10720.2	1	95.7526	1085	1831.14	1.01475e-21	2	43.9531	985	1458.33	1.2673e-09	12	46.701	781	1204.28	1.40057e-05	96	320.893	989	1510.25	1.09433e-25	2	7.96468	987	1502.28	0.0292303	192	207.351	793	1250.98	0.280801	NA	NA	1086	1926.89	NA	0.142255	0.00353083	0.0919211
Bcin01g10730.1	1	117.841	1085	1999.67	1.92706e-26	2	74.8702	985	1517.88	4.70385e-16	12	49.5691	781	1248.32	4.75154e-06	96	369.971	989	1629.69	2.38518e-33	2	36.9449	987	1592.75	4.62267e-08	192	219.992	793	1297.89	0.118665	NA	NA	1086	2117.51	NA	0.146557	0.014635	0.0871456
Bcin01g10740.1	1	7.55539	1085	1271.8	0.0099032	2	5.32475	985	907.079	0.0922089	12	33.6576	781	679.702	0.00143954	96	348.966	989	922.833	5.01716e-30	2	10.4288	987	912.404	0.00965429	192	193.72	793	713.359	0.551186	NA	NA	1086	1279.35	NA	0.212947	0.00636391	0.118212
Bcin01g10750.1	1	59.9222	1085	1735.16	4.74444e-14	2	7.60142	985	1248.94	0.0331962	12	72.8205	781	908.489	4.68074e-10	96	474.274	989	1260.88	1.08515e-50	2	4.3463	987	1256.54	0.146988	192	267.627	793	981.309	0.000785884	NA	NA	1086	1795.08	NA	0.208591	0.00191155	0.117706
Bcin01g10750.2	1	89.25	1085	1723.97	2.51782e-20	2	11.6922	985	1242.33	0.00511685	12	86.8043	781	887.303	1.44753e-12	96	464.699	989	1259.27	4.75797e-49	2	5.25178	987	1254.02	0.0982499	192	268.218	793	974.107	0.000729284	NA	NA	1086	1813.22	NA	0.203532	0.00230022	0.117476
Bcin01g10750.3	1	101.244	1085	1909.23	6.70357e-23	2	21.8471	985	1370.8	4.48977e-05	12	80.8215	781	997.741	1.74548e-11	96	496.735	989	1412.49	1.42231e-54	2	19.8456	987	1392.65	0.000132515	192	292.24	793	1078.56	2.49631e-05	NA	NA	1086	2010.47	NA	0.196567	0.00785325	0.115644
Bcin01g10770.1	1	0.000162633	1085	1723.86	0.991534	2	0.870435	985	1389.06	0.680319	12	19.3637	781	1129.26	0.101981	96	331.188	989	1392.67	2.90994e-27	2	2.74578	987	1389.93	0.300118	192	240.432	793	1148.63	0.0186976	NA	NA	1086	1723.86	NA	0.160943	0.00133433	0.116839
Bcin01g10780.1	1	8.25855	1085	2667.47	0.00691069	2	40.586	985	1458.25	6.25849e-09	12	68.502	781	1170.07	2.71235e-09	96	1167.83	989	1499.64	6.53395e-182	2	0.798298	987	1498.84	0.706025	192	219.681	793	1238.57	0.121562	NA	NA	1086	2675.72	NA	0.303778	0.000207655	0.0571439
Bcin01g10790.1	1	2.79286	1085	2795.78	0.126994	2	131.649	985	1618.62	6.23877e-28	12	169.761	781	1197.97	2.86757e-28	96	1026.01	989	1769.77	6.1888e-154	2	19.5063	987	1750.27	0.00015428	192	250.885	793	1367.73	0.0060327	NA	NA	1086	2798.58	NA	0.266906	0.00507435	0.065265
Bcin01g10810.1	1	58.9655	1085	2045.24	7.5853e-14	2	11.6366	985	1457.65	0.0052467	12	38.3452	781	1158.65	0.000288941	96	575.52	989	1469.72	1.65287e-68	2	0.435202	987	1469.28	0.826982	192	260.655	793	1196.99	0.00189412	NA	NA	1086	2104.2	NA	0.214733	0.000162379	0.0972534
Bcin01g10820.1	1	19.2494	1085	1853.98	2.70701e-05	2	40.9326	985	1225.46	5.32328e-09	12	58.7327	781	976.911	1.35965e-07	96	577.511	989	1276.46	7.21416e-69	2	10.0711	987	1266.39	0.0113608	192	189.817	793	1035.64	0.635285	NA	NA	1086	1873.22	NA	0.234684	0.00409259	0.0771359
Bcin01g10840.1	1	43.2677	1085	2079.93	1.8039e-10	2	14.0879	985	1470.47	0.00168475	12	75.6188	781	1198.63	1.50423e-10	96	590.454	989	1489.47	3.34689e-71	2	4.9185	987	1484.55	0.113999	192	196.219	793	1274.25	0.496984	NA	NA	1086	2123.2	NA	0.217193	0.00180923	0.0721773
Bcin01g10850.1	1	6.32353	1085	1125.27	0.0188506	2	1.07523	985	853.753	0.620712	12	23.2734	781	607.995	0.0360397	96	259.767	989	865.502	8.40968e-17	2	10.6746	987	854.828	0.00866397	192	222.484	793	631.268	0.0975812	NA	NA	1086	1131.59	NA	0.185279	0.00761365	0.158687
Bcin01g10860.1	1	5.39603	1085	1322.37	0.0307374	2	0.386512	985	1175.98	0.842512	12	27.6973	781	943.16	0.00976284	96	120.297	989	1202.08	0.0496589	2	25.714	987	1176.36	8.67469e-06	192	205.119	793	970.857	0.319246	NA	NA	1086	1327.77	NA	0.0816246	0.0174476	0.139179
Bcin01g10870.1	1	26.735	1085	2463.83	6.47868e-07	2	97.3849	985	1692.02	9.01926e-21	12	160.229	781	1256.89	1.89598e-26	96	643.88	989	1819.95	5.99405e-81	2	30.546	987	1789.4	9.13596e-07	192	274.898	793	1417.12	0.00029982	NA	NA	1086	2490.56	NA	0.203438	0.00965122	0.0868558
Bcin01g10880.1	1	107.745	1085	2419.64	2.73738e-24	2	37.8362	985	1641.11	2.31927e-08	12	185.485	781	1179.42	2.52961e-31	96	710.474	989	1709.17	2.58643e-93	2	30.2248	987	1678.94	1.06198e-06	192	276.207	793	1364.9	0.000251679	NA	NA	1086	2527.39	NA	0.217397	0.00924846	0.0845164
Bcin01g10890.1	1	201.978	1085	2475.97	1.98265e-44	2	54.9914	985	1665.82	6.50907e-12	12	162.702	781	1190.34	6.46969e-27	96	717.408	989	1758.56	1.3054e-94	2	37.7464	987	1720.81	3.17295e-08	192	312.778	793	1353.04	9.77241e-07	NA	NA	1086	2677.94	NA	0.208968	0.0109949	0.0911066
Bcin01g10910.1	1	0.566916	1085	779.191	0.511047	2	0.964724	985	643.332	0.652091	12	6.70702	781	497.281	0.88301	96	130.264	989	648.927	0.0123273	2	4.62991	987	644.297	0.129536	192	139.344	793	503.988	1	NA	NA	1086	779.757	NA	0.142419	0.00506194	0.152346
Bcin01g10920.1	1	13.2913	1085	1894.04	0.000542041	2	32.9499	985	1554.41	2.40211e-07	12	63.9664	781	1240.79	1.68926e-08	96	298.135	989	1595.9	2.79179e-22	2	8.54193	987	1587.36	0.0225533	192	249.651	793	1304.76	0.00696193	NA	NA	1086	1907.33	NA	0.134659	0.00385814	0.11276
Bcin01g10930.1	1	16.3948	1085	1883.29	0.000113379	2	24.0989	985	1633.56	1.56099e-05	12	66.3308	781	1305.46	6.51716e-09	96	219.14	989	1664.15	1.80261e-11	2	6.49668	987	1657.66	0.0564639	192	261.764	793	1371.79	0.00165661	NA	NA	1086	1899.69	NA	0.103109	0.00305679	0.123164
Bcin01g10930.2	1	3.6036	1085	2004.97	0.0807949	2	64.1119	985	1618.66	8.06196e-14	12	56.9679	781	1282.83	2.73718e-07	96	301.009	989	1703.96	1.0471e-22	2	21.1945	987	1682.77	7.06968e-05	192	278.86	793	1339.8	0.000173908	NA	NA	1086	2008.58	NA	0.129145	0.00909331	0.119642
Bcin01g10940.1	1	43.5023	1085	1606.29	1.60397e-10	2	11.7905	985	1055.22	0.00489163	12	29.2695	781	858.525	0.0059645	96	539.197	989	1067.09	5.01842e-62	2	0.076829	987	1067.01	0.967629	192	167.428	793	887.794	0.98326	NA	NA	1086	1649.79	NA	0.246314	3.50968e-05	0.0764837
Bcin01g10950.1	1	1.84654	1085	1912.5	0.21981	2	17.1402	985	1477.44	0.000408817	12	40.8962	781	1146.51	0.000116937	96	338.461	989	1574.04	2.18548e-28	2	79.4529	987	1494.58	9.04889e-17	192	290.033	793	1187.41	3.46629e-05	NA	NA	1086	1914.34	NA	0.145122	0.034067	0.124357
Bcin01g10960.1	1	83.1667	1085	1880.5	5.06274e-19	2	14.4869	985	1509.17	0.00139954	12	35.8261	781	1209.81	0.000691167	96	350.776	989	1529.72	2.61029e-30	2	6.06545	987	1523.65	0.0684427	192	263.532	793	1245.64	0.0013393	NA	NA	1086	1963.66	NA	0.151164	0.00261385	0.113567
Bcin01g10970.1	1	50.9087	1085	1940.4	4.07796e-12	2	9.27125	985	1540.05	0.0155401	12	27.3744	781	1226.83	0.0107999	96	389.279	989	1551.12	1.81452e-36	2	1.80077	987	1549.32	0.454047	192	285.848	793	1254.2	6.3908e-05	NA	NA	1086	1991.31	NA	0.163399	0.000755869	0.119984
Bcin01g10980.1	1	37.4114	1085	2171.5	3.28081e-09	2	56.2545	985	1544.28	3.55053e-12	12	55.8391	781	1251.33	4.25883e-07	96	544.135	989	1627.36	6.64209e-63	2	26.8338	987	1600.53	5.14931e-06	192	237.11	793	1307.17	0.0261161	NA	NA	1086	2208.91	NA	0.195741	0.00965285	0.0852949
Bcin01g10990.1	1	6.11924	1085	1469.51	0.0209844	2	8.19298	985	1158.07	0.0254494	12	48.3948	781	904.113	7.41348e-06	96	292.399	989	1177.12	1.93453e-21	2	10.8492	987	1166.27	0.00800329	192	205.566	793	952.508	0.311226	NA	NA	1086	1475.63	NA	0.164372	0.00609889	0.115559
Bcin01g11000.1	1	42.028	1085	1224.26	3.32937e-10	2	0.754781	985	1071.35	0.716036	12	13.5324	781	887.231	0.365411	96	149.081	989	1075.18	0.000479001	2	3.0727	987	1072.11	0.259765	192	170.591	793	900.763	0.957168	NA	NA	1086	1266.29	NA	0.105102	0.00216625	0.120266
Bcin01g11010.1	1	18.7143	1085	2425.67	3.5421e-05	2	112.461	985	1590.89	6.46915e-24	12	100.166	781	1156.3	5.07996e-15	96	649.279	989	1776.39	6.02758e-82	2	73.0446	987	1703.35	1.82995e-15	192	334.42	793	1256.47	2.12435e-08	NA	NA	1086	2444.39	NA	0.205033	0.0230664	0.105605
Bcin01g11020.1	1	9.17016	1085	2205.13	0.00433358	2	108.945	985	1558.65	3.51992e-23	12	96.6331	781	1156.78	2.27853e-14	96	530.086	989	1675.05	2.06021e-60	2	7.44964	987	1667.6	0.036724	192	305.24	793	1253.41	3.33047e-06	NA	NA	1086	2214.3	NA	0.19263	0.00270715	0.110922
Bcin01g11030.1	1	3.79231	1085	2694.14	0.0728687	2	152.723	985	1603.1	2.38739e-32	12	102.487	781	1163.1	1.8847e-15	96	914.959	989	1779.18	2.78086e-132	2	23.3585	987	1755.82	2.58006e-05	192	337.517	793	1265.58	1.1581e-08	NA	NA	1086	2697.93	NA	0.251621	0.00642379	0.0928201
Bcin01g11040.1	1	63.2538	1085	2063.97	9.16319e-15	2	37.9279	985	1439.53	2.22196e-08	12	65.7986	781	1100.12	8.07271e-09	96	585.227	989	1478.74	2.95141e-70	2	1.28674	987	1477.45	0.568307	192	273.604	793	1165.92	0.000357377	NA	NA	1086	2127.22	NA	0.215654	0.000474157	0.100822
Bcin01g11050.1	1	15.8433	1085	2616.12	0.000149612	2	259.586	985	1662.75	1.32504e-54	12	202.813	781	1193.69	1.04603e-34	96	638.732	989	1977.39	5.25125e-80	2	55.0608	987	1922.33	9.11813e-12	192	266.241	793	1396.5	0.000943821	NA	NA	1086	2631.97	NA	0.192056	0.0165558	0.0800542
Bcin01g11060.1	1	122.915	1085	2014.1	1.58595e-27	2	9.25297	985	1570.99	0.0156747	12	84.6713	781	1223.22	3.53639e-12	96	424.298	989	1589.81	3.10695e-42	2	9.56567	987	1580.24	0.0142073	192	263.092	793	1307.9	0.00141187	NA	NA	1086	2137.02	NA	0.16504	0.00372077	0.102335
Bcin01g11120.1	1	0.0100035	1085	1487.97	0.933401	2	12.0999	985	1320.09	0.00424164	12	28.3527	781	1109.53	0.00798443	96	146.773	989	1341.2	0.000741734	2	9.00747	987	1332.19	0.0183158	192	182.214	793	1137.88	0.788581	NA	NA	1086	1487.98	NA	0.0892906	0.00547979	0.110852
Bcin01g11130.1	1	3.33044	1085	1131.02	0.0939712	2	13.6011	985	971.478	0.00211299	12	15.1278	781	787.192	0.26837	96	144.021	989	986.996	0.00123114	2	1.91686	987	985.079	0.431769	192	169.158	793	802.32	0.970772	NA	NA	1086	1134.35	NA	0.112491	0.00149721	0.132125
Bcin01g11140.1	1	20.0379	1085	2151.37	1.82228e-05	2	69.2947	985	1116.46	6.8047e-15	12	41.4549	781	884.823	9.58029e-05	96	959.107	989	1192.26	7.45205e-141	2	6.5051	987	1185.76	0.0562354	192	190.182	793	926.278	0.627467	NA	NA	1086	2171.41	NA	0.305739	0.00207366	0.0606252
Bcin01g11150.1	1	5.86717	1085	1060.05	0.0239608	2	11.4278	985	870.167	0.00577576	12	54.4861	781	622.577	7.20679e-07	96	178.296	989	881.758	8.59014e-07	2	0.163242	987	881.595	0.932062	192	193.105	793	677.063	0.56485	NA	NA	1086	1065.92	NA	0.143281	0.000131183	0.155181
Bcin01g11160.1	1	1.02659	1085	1213.45	0.36956	2	14.8434	985	985.641	0.00118605	12	66.7043	781	738.654	5.60668e-09	96	197.193	989	1016.26	7.43063e-09	2	15.7764	987	1000.48	0.000851349	192	180.282	793	805.359	0.822246	NA	NA	1086	1214.48	NA	0.138144	0.0110521	0.126297
Bcin01g11170.1	1	4.68358	1085	1643.71	0.0449115	2	4.91259	985	1377.09	0.11118	12	54.0312	781	1109.31	8.59245e-07	96	260.56	989	1383.15	6.53353e-17	2	1.15118	987	1382	0.602754	192	213.748	793	1163.34	0.187129	NA	NA	1086	1648.4	NA	0.136411	0.00060268	0.111903
Bcin01g11170.2	1	0.568739	1085	1653.9	0.510411	2	1.47901	985	1403.56	0.520093	12	49.36	781	1140.25	5.14766e-06	96	242.834	989	1411.06	1.64274e-14	2	6.0278	987	1405.04	0.0695731	192	213.942	793	1189.61	0.184683	NA	NA	1086	1654.47	NA	0.127584	0.00316698	0.112404
Bcin01g11180.1	1	12.4018	1085	1740.71	0.000848678	2	12.1872	985	1532.46	0.00407706	12	22.3012	781	1227.68	0.0471478	96	189.384	989	1551.33	5.59462e-08	2	6.68091	987	1544.65	0.0518605	192	282.474	793	1249.99	0.000103933	NA	NA	1086	1753.11	NA	0.0971611	0.00342755	0.14492
Bcin01g11200.1	1	3.47051	1085	1179.47	0.0870202	2	31.5766	985	993.735	4.60124e-07	12	12.4892	781	803.559	0.439521	96	152.291	989	1027.18	0.000256792	2	1.86823	987	1025.31	0.440684	192	177.687	793	816.048	0.865584	NA	NA	1086	1182.94	NA	0.113896	0.00139723	0.13289
Bcin01g11210.1	1	8.46727	1085	1062.61	0.00619836	2	28.1781	985	803.43	2.29212e-06	12	13.5504	781	630.227	0.364144	96	219.375	989	843.232	1.68598e-11	2	11.6243	987	831.608	0.00562328	192	159.653	793	643.777	1	NA	NA	1086	1071.07	NA	0.168481	0.00892756	0.122614
Bcin01g11220.1	1	107.027	1085	2520.61	3.87862e-24	2	274.28	985	1565.72	1.1142e-57	12	175.021	781	1165.44	2.82721e-29	96	615.007	989	1905.61	1.14138e-75	2	65.6039	987	1840	6.22519e-14	192	225.267	793	1340.46	0.077534	NA	NA	1086	2627.64	NA	0.185901	0.0198304	0.0680925
Bcin01g11230.1	1	51.7321	1085	1822.81	2.71542e-12	2	17.5217	985	1434.82	0.000342587	12	35.7793	781	1153.6	0.000702333	96	300.972	989	1521.84	1.06047e-22	2	69.4941	987	1452.34	9.85405e-15	192	245.446	793	1189.38	0.0110503	NA	NA	1086	1874.54	NA	0.134063	0.030955	0.10933
Bcin01g11240.1	1	0.070221	1085	1430.22	0.823387	2	1.27577	985	1313.01	0.568716	12	13.2998	781	1089.41	0.381539	96	115.631	989	1314.59	0.0875311	2	0.30329	987	1314.28	0.875898	192	210.297	793	1102.71	0.235113	NA	NA	1086	1430.29	NA	0.0747829	0.000196149	0.136007
Bcin01g11270.1	1	15.2845	1085	2212.91	0.000198363	2	95.1291	985	1505.46	2.67335e-20	12	93.0706	781	1169.6	1.02565e-13	96	587.344	989	1625.57	1.22639e-70	2	24.9745	987	1600.59	1.22739e-05	192	242.79	793	1262.67	0.0145753	NA	NA	1086	2228.19	NA	0.206774	0.00879226	0.0854741
Bcin01g11280.1	1	111.774	1085	1949.55	3.81677e-25	2	6.2252	985	1581.92	0.0617616	12	46.3825	781	1252.89	1.57345e-05	96	359.226	989	1590.32	1.21444e-31	2	2.17702	987	1588.14	0.385753	192	282.641	793	1299.28	0.000101673	NA	NA	1086	2061.32	NA	0.148274	0.000898584	0.116662
Bcin01g11290.1	1	12.5771	1085	1658.79	0.000776492	2	7.02489	985	1364.06	0.0431083	12	30.0305	781	1128.05	0.00467935	96	287.234	989	1371.55	1.09637e-20	2	0.472366	987	1371.08	0.81383	192	205.98	793	1158.08	0.303984	NA	NA	1086	1671.37	NA	0.146617	0.000241117	0.105142
Bcin01g11300.1	1	96.0839	1085	2244.6	8.60543e-22	2	77.4705	985	1437.05	1.34335e-16	12	90.5447	781	1124.88	2.96895e-13	96	716.451	989	1528.15	1.97203e-94	2	13.6282	987	1514.52	0.0022462	192	221.624	793	1215.43	0.104634	NA	NA	1086	2340.69	NA	0.233314	0.00443805	0.0721724
Bcin01g11310.1	1	56.688	1085	1849.2	2.34039e-13	2	24.9998	985	1535.31	1.02378e-05	12	62.2331	781	1231.79	3.38006e-08	96	284.925	989	1564.28	2.3687e-20	2	3.97124	987	1560.31	0.173587	192	241.283	793	1294.02	0.0170954	NA	NA	1086	1905.89	NA	0.129819	0.0018094	0.109935
Bcin01g11320.1	1	73.613	1085	1794.83	5.55271e-17	2	7.3417	985	1474.65	0.0373515	12	16.4383	781	1188.29	0.202614	96	305.29	989	1489.54	2.43442e-23	2	7.54865	987	1481.99	0.0351462	192	269.919	793	1204.73	0.00058165	NA	NA	1086	1868.44	NA	0.139959	0.00346065	0.123744
Bcin01g11330.1	1	59.3319	1085	2030.88	6.32866e-14	2	2.51499	985	1528.75	0.327998	12	82.707	781	1208.64	7.96133e-12	96	469.136	989	1561.74	8.29283e-50	2	30.4707	987	1531.27	9.45433e-07	192	237.401	793	1291.35	0.025366	NA	NA	1086	2090.21	NA	0.181147	0.0117656	0.0916672
Bcin01g11340.1	1	50.3775	1085	1898.12	5.30203e-12	2	0.0322721	985	1524.25	0.985799	12	60.1271	781	1222.63	7.82222e-08	96	365.15	989	1532.97	1.39644e-32	2	8.6822	987	1524.29	0.021199	192	241.501	793	1282.75	0.0167044	NA	NA	1086	1948.5	NA	0.157234	0.00373858	0.103991
Bcin01g11350.1	1	2.9175	1085	1808.31	0.118396	2	43.7977	985	1511.28	1.36511e-09	12	35.2117	781	1221.23	0.000852288	96	242.781	989	1565.53	1.66924e-14	2	10.4455	987	1555.08	0.00958362	192	254.846	793	1256.44	0.00381896	NA	NA	1086	1811.23	NA	0.117601	0.00505967	0.123445
Bcin01g11360.1	1	13.9839	1085	2215.48	0.000382794	2	88.7669	985	1593.85	5.77851e-19	12	66.4676	781	1299.73	6.16946e-09	96	508.697	989	1706.79	1.16845e-56	2	24.1698	987	1682.62	1.77362e-05	192	227.653	793	1366.2	0.0632637	NA	NA	1086	2229.47	NA	0.184155	0.00874976	0.0824134
Bcin01g11390.1	1	0.0375838	1085	1522.63	0.870857	2	10.9121	985	1281.98	0.00732035	12	29.935	781	997.472	0.00482098	96	228.393	989	1294.24	1.24008e-12	2	1.35153	987	1292.89	0.552766	192	254.568	793	1027.41	0.00394454	NA	NA	1086	1522.67	NA	0.130331	0.000771241	0.145267
Bcin01g11410.1	1	10.6929	1085	1591.87	0.00201184	2	14.1656	985	794.396	0.00162394	12	9.81897	781	607.403	0.65454	96	778.268	989	813.598	4.42507e-106	2	5.03674	987	808.561	0.107982	192	177.174	793	617.222	0.872811	NA	NA	1086	1602.56	NA	0.3262	0.00211108	0.0742598
Bcin01g11430.1	1	6.3862	1085	1643.43	0.018234	2	31.0459	985	1322.18	5.9276e-07	12	17.3349	781	1111.12	0.166129	96	288.449	989	1354.98	7.30117e-21	2	1.75516	987	1353.22	0.463184	192	193.728	793	1128.45	0.551091	NA	NA	1086	1649.81	NA	0.148684	0.000904713	0.0998587
Bcin01g11450.1	1	339.385	1085	2787.6	7.53749e-74	2	23.1225	985	1547.79	2.46337e-05	12	39.1342	781	1199.36	0.0002195	96	1195.2	989	1592.4	2.4359e-187	2	21.4873	987	1570.91	6.15949e-05	192	309.292	793	1238.5	1.72184e-06	NA	NA	1086	3126.98	NA	0.275159	0.00494681	0.0712054
Bcin01g11460.1	1	522.487	1085	2675.97	5.94755e-113	2	23.4205	985	1505.02	2.14628e-05	12	61.0967	781	1145.19	5.31183e-08	96	1124.98	989	1550.99	2.02659e-173	2	22.5423	987	1528.45	3.77019e-05	192	298.738	793	1206.29	9.24607e-06	NA	NA	1086	3198.45	NA	0.258855	0.00518693	0.0687389
Bcin01g11470.1	1	438.219	1085	2509.19	6.45785e-95	2	14.5531	985	1430.71	0.0013571	12	40.2629	781	1133.77	0.000146962	96	1032.75	989	1476.44	3.00261e-155	2	31.1782	987	1445.26	6.8213e-07	192	256.675	793	1174.03	0.00307108	NA	NA	1086	2947.41	NA	0.257458	0.00777251	0.0639872
Bcin01g11470.2	1	400.984	1085	2482.91	5.11743e-87	2	17.6361	985	1450.58	0.000324529	12	39.3822	781	1141.69	0.000201131	96	977.381	989	1505.53	2.05e-144	2	37.314	987	1468.22	3.88039e-08	192	269.511	793	1181.07	0.000614374	NA	NA	1086	2883.9	NA	0.250701	0.00957114	0.0691303
Bcin01g11480.1	1	255.178	1085	2733.35	8.00054e-56	2	10.3616	985	1433.8	0.00941711	12	33.1253	781	1128.84	0.00171649	96	1284.97	989	1448.38	3.03127e-205	2	4.22621	987	1444.16	0.155006	192	271.828	793	1161.97	0.000453317	NA	NA	1086	2988.53	NA	0.300386	0.000987959	0.0635452
Bcin01g11490.1	1	336.445	1085	2782.06	3.17318e-73	2	6.92034	985	1492.87	0.0451057	12	29.7938	781	1168.47	0.00504682	96	1273.12	989	1508.94	6.94408e-203	2	9.1463	987	1499.79	0.0172009	192	294.614	793	1198.26	1.74689e-05	NA	NA	1086	3118.51	NA	0.289295	0.00207834	0.0669459
Bcin01g11500.1	1	432.652	1085	2641.92	9.51091e-94	2	37.3117	985	1494.68	2.98186e-08	12	50.564	781	1180.52	3.26241e-06	96	1093.19	989	1548.73	3.85251e-167	2	16.7329	987	1532	0.000548788	192	263.598	793	1231.09	0.00133045	NA	NA	1086	3074.57	NA	0.261248	0.00399877	0.0629938
Bcin01g11510.1	1	8.30892	1085	1970	0.00673276	2	3.52412	985	1419.85	0.20763	12	18.2307	781	1121.71	0.13483	96	527.095	989	1442.9	6.91576e-60	2	19.5306	987	1423.37	0.000152499	192	279.911	793	1139.94	0.000150079	NA	NA	1086	1978.31	NA	0.208756	0.00773511	0.110859
Bcin01g11520.1	1	295.505	1085	2633.74	1.95693e-64	2	3.2716	985	1472.42	0.233119	12	38.1304	781	1144.86	0.000311249	96	1153.73	989	1480.01	4.00692e-179	2	4.32037	987	1475.69	0.148698	192	289.426	793	1182.99	3.79055e-05	NA	NA	1086	2929.24	NA	0.282272	0.00105703	0.0708112
Bcin01g11530.1	1	324.869	1085	2845.64	9.58832e-71	2	35.1377	985	1485.38	8.45109e-08	12	43.1726	781	1180.46	5.14388e-05	96	1277.34	989	1568.3	1.01079e-203	2	47.7858	987	1520.52	2.7885e-10	192	261.747	793	1223.63	0.00165936	NA	NA	1086	3170.51	NA	0.284129	0.0106294	0.0582224
Bcin01g11540.1	1	245.273	1085	2691.95	1.04282e-53	2	4.10588	985	1497.28	0.160192	12	50.4148	781	1129.35	3.45159e-06	96	1176.25	989	1515.7	1.40991e-183	2	14.3139	987	1501.39	0.00164946	192	317.518	793	1179.76	4.39415e-07	NA	NA	1086	2937.22	NA	0.284959	0.00346769	0.0769222
Bcin01g11550.1	1	288.542	1085	3097.15	5.88531e-63	2	11.6673	985	1514.21	0.00517184	12	42.4578	781	1151.18	6.674e-05	96	1550.4	989	1546.76	8.59836e-259	2	20.8831	987	1525.87	8.17595e-05	192	320.564	793	1193.64	2.58116e-07	NA	NA	1086	3385.7	NA	0.312771	0.00421287	0.0646692
Bcin01g11560.1	1	26.4467	1085	2227.61	7.48314e-07	2	17.1341	985	1020.13	0.000409854	12	26.0882	781	781.702	0.0159625	96	1173.95	989	1053.67	3.99392e-183	2	16.4036	987	1037.26	0.000635995	192	212.339	793	807.79	0.205933	NA	NA	1086	2254.06	NA	0.340826	0.0047624	0.0616476
Bcin02g00005.1	1	27.7345	1085	3120.77	3.94375e-07	2	7.45333	985	1194.91	0.0354808	12	50.4556	781	904.496	3.39813e-06	96	1904.37	989	1216.4	0	2	14.038	987	1202.36	0.00186829	192	239.955	793	954.952	0.019654	NA	NA	1086	3148.51	NA	0.375845	0.00277053	0.0473571	predicted protein	no GO terms
Bcin02g00006.1	1	0.287327	1085	1097.32	0.644475	2	4.84771	985	680.35	0.11452	12	14.5205	781	538.555	0.303201	96	408.217	989	689.106	1.45202e-39	2	3.90875	987	685.197	0.178465	192	127.274	793	553.075	1	NA	NA	1086	1097.61	NA	0.27039	0.00258903	0.0843024
Bcin02g00007.1	1	75.8832	1085	3799.32	1.81433e-17	2	22.0971	985	1340.99	3.99544e-05	12	99.4768	781	929.586	6.8173e-15	96	2407.02	989	1392.31	0	2	29.2187	987	1363.09	1.69937e-06	192	311.928	793	1029.06	1.12828e-06	NA	NA	1086	3875.21	NA	0.381373	0.00462948	0.0494226		no GO terms
Bcin02g00008.1	1	21.0399	1085	1888.36	1.10828e-05	2	2.51084	985	969.633	0.328538	12	14.7458	781	767.652	0.290203	96	842.616	989	1045.74	2.43555e-118	2	73.5961	987	972.144	1.42363e-15	192	187.235	793	782.398	0.688417	NA	NA	1086	1909.4	NA	0.298207	0.0260461	0.0662637
Bcin02g00013.1	1	113.05	1085	3976.82	2.0428e-25	2	75.8736	985	1562.87	2.89592e-16	12	62.7745	781	1155.33	2.73138e-08	96	2294.36	989	1682.46	0	2	43.7135	987	1638.74	1.90354e-09	192	344.762	793	1218.11	2.91343e-09	NA	NA	1086	4089.87	NA	0.356936	0.00680054	0.0536349	salicylate 1-monooxygenase	F:FAD binding; F:oxidoreductase activity; P:oxidation-reduction process
Bcin02g00014.1	1	249.657	1085	2828.33	1.22914e-54	2	71.9029	985	1485.44	1.9521e-15	12	82.0269	781	1122.86	1.05858e-11	96	1192.93	989	1635.4	6.83891e-187	2	78.0553	987	1557.35	1.75574e-16	192	280.554	793	1204.89	0.000136481	NA	NA	1086	3077.98	NA	0.274301	0.017948	0.0645105
Bcin02g00015.1	1	78.9297	1085	2493.68	4.05381e-18	2	111.358	985	1287.16	1.10663e-23	12	88.1491	781	970.514	8.2477e-13	96	985.344	989	1508.33	5.72198e-146	2	109.815	987	1398.52	4.69205e-23	192	228.496	793	1058.66	0.0587577	NA	NA	1086	2572.61	NA	0.26865	0.0299407	0.0622985
Bcin02g00016.1	1	277.146	1085	3403.76	1.52082e-60	2	173.495	985	1733.46	1.05188e-36	12	126.182	781	1252.39	6.66439e-20	96	1493.47	989	1910.29	2.89221e-247	2	3.33537	987	1906.95	0.231009	192	354.887	793	1378.57	3.80135e-10	NA	NA	1086	3680.91	NA	0.288443	0.000644178	0.0685412
Bcin02g00020.1	1	10.0584	1085	2155.11	0.0027711	2	53.0224	985	1358.66	1.66365e-11	12	48.9569	781	1085.82	5.98567e-06	96	734.734	989	1420.38	7.27915e-98	2	8.69649	987	1411.68	0.0210592	192	223.877	793	1134.78	0.0871339	NA	NA	1086	2165.17	NA	0.252607	0.00298992	0.0769708
Bcin02g00030.1	1	64.9505	1085	1776.58	3.95475e-15	2	21.9118	985	1291.95	4.3623e-05	12	48.6486	781	1032.99	6.72926e-06	96	448.354	989	1328.23	2.83168e-46	2	14.3677	987	1313.86	0.00160976	192	210.314	793	1081.63	0.234926	NA	NA	1086	1841.53	NA	0.194577	0.00623528	0.091272
Bcin02g00080.1	1	241.109	1085	1837.99	8.10806e-53	2	87.0808	985	1302.52	1.3009e-18	12	50.0743	781	1020.42	3.91747e-06	96	441.961	989	1396.03	3.40106e-45	2	6.42851	987	1389.6	0.0581972	192	232.023	793	1070.5	0.0427506	NA	NA	1086	2079.1	NA	0.174862	0.00254344	0.0917997
Bcin02g00090.1	1	5.67416	1085	1265.4	0.0265403	2	2.76712	985	1066.92	0.292652	12	24.794	781	874.456	0.0234129	96	185.604	989	1079.79	1.4443e-07	2	10.1041	987	1069.69	0.011185	192	167.67	793	899.25	0.981197	NA	NA	1086	1271.07	NA	0.126539	0.00688867	0.114312
Bcin02g00100.1	1	46.739	1085	1159.18	3.21617e-11	2	30.2563	985	860.044	8.62124e-07	12	41.0134	781	635.841	0.000112309	96	257.341	989	901.836	1.80883e-16	2	11.5357	987	890.3	0.00586256	192	183.19	793	676.854	0.77106	NA	NA	1086	1205.92	NA	0.174493	0.00782194	0.124214
Bcin02g00110.1	1	0.437499	1085	1768.03	0.565802	2	13.2599	985	1527.67	0.0024742	12	12.493	781	1242.33	0.439253	96	222.123	989	1545.91	7.68333e-12	2	4.97512	987	1540.93	0.111168	192	272.846	793	1254.82	0.000396035	NA	NA	1086	1768.47	NA	0.111308	0.00249309	0.136726
Bcin02g00120.1	1	58.4737	1085	1902.93	9.68009e-14	2	1.87	985	1541.21	0.438284	12	31.8135	781	1205.8	0.00264732	96	357.804	989	1545.13	2.03917e-31	2	2.05069	987	1543.08	0.40738	192	303.601	793	1237.61	4.32909e-06	NA	NA	1086	1961.41	NA	0.154142	0.000883436	0.130791
Bcin02g00130.1	1	31.1525	1085	1761.09	7.30395e-08	2	44.2963	985	1431.14	1.07623e-09	12	54.1516	781	1111.98	8.20798e-07	96	281.104	989	1479.98	8.39238e-20	2	4.54684	987	1475.44	0.134271	192	265.004	793	1166.13	0.00111021	NA	NA	1086	1792.24	NA	0.135283	0.0021882	0.127535
Bcin02g00140.1	1	35.9235	1085	1273.77	6.87803e-09	2	0.0739819	985	840.689	0.966913	12	50.7372	781	567.332	3.05939e-06	96	431.135	989	842.634	2.25755e-43	2	1.8711	987	840.763	0.440159	192	222.619	793	618.069	0.0965368	NA	NA	1086	1309.69	NA	0.247395	0.00107368	0.127744
Bcin02g00150.1	1	22.0689	1085	1763.05	6.62346e-06	2	0.457184	985	1535.68	0.817129	12	36.503	781	1239	0.000548044	96	225.844	989	1537.2	2.61798e-12	2	1.06827	987	1536.14	0.626029	192	260.178	793	1275.5	0.00200794	NA	NA	1086	1785.12	NA	0.112247	0.000530939	0.129311
Bcin02g00160.1	1	239.731	1085	2040.39	1.5834e-52	2	61.4973	985	1395.5	2.8477e-13	12	65.7844	781	1131.78	8.11786e-09	96	488.122	989	1552.27	4.42807e-53	2	95.2667	987	1457	4.87017e-20	192	197.938	793	1197.56	0.460795	NA	NA	1086	2280.12	NA	0.170463	0.0332693	0.0691245
Bcin02g00170.1	1	18.628	1085	1982.84	3.69948e-05	2	17.3434	985	1575.03	0.000372241	12	43.1872	781	1216.24	5.11867e-05	96	376.534	989	1606.31	2.10611e-34	2	13.9278	987	1592.38	0.00196313	192	315.603	793	1259.43	6.02445e-07	NA	NA	1086	2001.47	NA	0.157419	0.00582283	0.131945
Bcin02g00190.1	1	0.479499	1085	1810.74	0.546713	2	7.88278	985	1568.74	0.029299	12	50.7246	781	1254.92	3.07379e-06	96	209.252	989	1601.49	2.8935e-10	2	24.8681	987	1576.62	1.28949e-05	192	263.092	793	1305.65	0.00141187	NA	NA	1086	1811.22	NA	0.102306	0.0121584	0.12863
Bcin02g00190.2	1	1.26562	1085	1906.21	0.315097	2	10.7194	985	1613.65	0.00798854	12	43.837	781	1257.66	4.04226e-05	96	264.366	989	1641.84	1.94175e-17	2	17.4784	987	1624.36	0.000390839	192	312.15	793	1301.49	1.08834e-06	NA	NA	1086	1907.47	NA	0.120753	0.00798348	0.142579
Bcin02g00200.1	1	4.89634	1085	1589.14	0.0401135	2	1.58265	985	1391.37	0.497225	12	45.0678	781	1107.74	2.57024e-05	96	187.54	989	1401.6	8.90794e-08	2	8.6494	987	1392.95	0.0215119	192	238.557	793	1152.81	0.0225858	NA	NA	1086	1594.04	NA	0.104758	0.00483145	0.133255
Bcin02g00210.1	1	240.606	1085	2143.7	1.03599e-52	2	162.514	985	1548.24	2.07277e-34	12	95.872	781	1168.01	3.14049e-14	96	424.93	989	1718.77	2.43958e-42	2	8.01012	987	1710.76	0.0286219	192	284.366	793	1263.88	7.895e-05	NA	NA	1086	2384.3	NA	0.150832	0.00284325	0.100938
Bcin02g00220.1	1	39.2556	1085	2204.51	1.315e-09	2	23.0917	985	1599.48	2.49741e-05	12	67.8059	781	1180.35	3.58419e-09	96	550.224	989	1654.29	5.50488e-64	2	31.7172	987	1622.57	5.29007e-07	192	351.324	793	1248.16	8.02728e-10	NA	NA	1086	2243.77	NA	0.194721	0.0112245	0.124331
Bcin02g00230.1	1	284.728	1085	2074.05	3.77989e-62	2	19.7975	985	1502.72	0.000118136	12	61.7184	781	1147.02	4.14234e-08	96	550.585	989	1523.47	4.74792e-64	2	0.946674	987	1522.52	0.660483	192	293.982	793	1208.74	1.91786e-05	NA	NA	1086	2358.78	NA	0.189184	0.000325283	0.101014
Bcin02g00240.1	1	38.9185	1085	2177.17	1.55097e-09	2	24.9392	985	1571.72	1.05302e-05	12	90.0181	781	1155	3.7179e-13	96	575.736	989	1601.43	1.51113e-68	2	4.77221	987	1596.66	0.121619	192	326.703	793	1245.02	8.84349e-08	NA	NA	1086	2216.09	NA	0.205871	0.00170644	0.116822
Bcin02g00250.1	1	5.81007	1085	1250.38	0.0246891	2	12.8537	985	1022.11	0.00299381	12	31.0101	781	737.543	0.00342835	96	205.997	989	1044.38	7.06439e-10	2	9.41766	987	1034.96	0.0151902	192	253.553	793	768.554	0.0044509	NA	NA	1086	1256.19	NA	0.139982	0.0063996	0.172297
Bcin02g00260.1	1	36.2572	1085	2093.48	5.8336e-09	2	17.015	985	1545.63	0.000432607	12	59.0792	781	1166.31	1.18707e-07	96	486.168	989	1607.31	9.61314e-53	2	44.6653	987	1562.64	1.21926e-09	192	320.245	793	1225.38	2.70394e-07	NA	NA	1086	2129.73	NA	0.182731	0.0167879	0.120367
Bcin02g00270.1	1	174.053	1085	2195.56	1.81528e-38	2	31.5383	985	1514.08	4.6853e-07	12	35.9874	781	1186.84	0.000653684	96	636.192	989	1559.36	1.53244e-79	2	13.7454	987	1545.62	0.0021301	192	291.252	793	1222.83	2.8961e-05	NA	NA	1086	2369.61	NA	0.210691	0.00455214	0.0964554
Bcin02g00280.1	1	101.971	1085	2393.37	4.69471e-23	2	26.6395	985	1569.02	4.72463e-06	12	69.2827	781	1173.78	1.98496e-09	96	774.593	989	1618.78	2.20029e-105	2	23.1182	987	1595.66	2.87832e-05	192	325.955	793	1243.07	1.00557e-07	NA	NA	1086	2495.34	NA	0.23522	0.00702028	0.0989825
Bcin02g00300.1	1	34.5798	1085	1970.28	1.34172e-08	2	29.2577	985	1405.18	1.3785e-06	12	76.6826	781	1075.37	9.65275e-11	96	533.487	989	1436.79	5.15307e-61	2	2.34944	987	1434.44	0.358216	192	253.129	793	1152.06	0.00467803	NA	NA	1086	2004.86	NA	0.209977	0.000924723	0.0996297
Bcin02g00310.1	1	7.54867	1085	1867.3	0.00993843	2	34.5868	985	1497.9	1.09772e-07	12	62.165	781	1190.45	3.47292e-08	96	311.411	989	1555.88	2.96004e-24	2	23.4002	987	1532.48	2.52843e-05	192	245.279	793	1252.62	0.0112456	NA	NA	1086	1874.84	NA	0.140932	0.01059	0.111003
Bcin02g00320.1	1	1.19882	1085	1528.78	0.329063	2	12.3545	985	1299.02	0.00377576	12	56.844	781	975.635	2.87648e-07	96	206.93	989	1321.85	5.46881e-10	2	10.4754	987	1311.37	0.00946821	192	266.539	793	1032.48	0.00090844	NA	NA	1086	1529.98	NA	0.118423	0.00599492	0.152536
Bcin02g00350.1	1	6.06604	1085	1450.42	0.0215841	2	18.4459	985	1178.96	0.000221652	12	58.8309	781	894.954	1.3089e-07	96	222.935	989	1227.48	6.08525e-12	2	30.0709	987	1197.41	1.13879e-06	192	225.179	793	953.785	0.0781053	NA	NA	1086	1456.48	NA	0.13041	0.0175906	0.131723
Bcin02g00380.1	1	0.032164	1085	872.946	0.880331	2	10.3205	985	712.624	0.00959549	12	36.2557	781	513.572	0.000596355	96	149.669	989	723.277	0.000428128	2	0.332539	987	722.944	0.865177	192	162.795	793	549.828	1	NA	NA	1086	872.978	NA	0.146307	0.000325069	0.159138
Bcin02g00400.1	1	0.012641	1085	1207.78	0.925737	2	7.22915	985	993.691	0.0392778	12	67.0803	781	754.36	4.81355e-09	96	188.917	989	1018.86	6.29436e-08	2	17.9413	987	1000.92	0.000316318	192	172.251	793	821.44	0.939105	NA	NA	1086	1207.79	NA	0.133543	0.0126825	0.121762
Bcin02g00410.1	1	4.5497	1085	827.687	0.0483198	2	3.46675	985	714.053	0.213311	12	27.7934	781	524.676	0.00948725	96	103.728	989	723.959	0.282133	2	6.4394	987	717.52	0.0579047	192	161.584	793	552.469	1	NA	NA	1086	832.237	NA	0.110067	0.00683295	0.171459
Bcin02g00420.2	1	0.402321	1085	2828.41	0.582763	2	121.824	985	1464.69	7.16278e-26	12	31.4741	781	1142.72	0.00295094	96	1110.43	989	1717.98	1.48672e-170	2	131.47	987	1586.51	1.50076e-27	192	290.494	793	1174.19	3.2275e-05	NA	NA	1086	2828.82	NA	0.272786	0.0322965	0.0713619
Bcin02g00430.1	1	72.7332	1085	1143.17	8.57417e-17	2	1.94167	985	888.295	0.424489	12	56.181	781	638.011	3.72592e-07	96	246.231	989	896.941	5.80166e-15	2	6.70431	987	890.237	0.0513301	192	194.103	793	694.192	0.54309	NA	NA	1086	1215.91	NA	0.167636	0.00456435	0.132147
Bcin02g00440.1	1	20.1105	1085	2628.24	1.75579e-05	2	252.472	985	1684.8	3.6674e-53	12	218.134	781	1216.31	1.09583e-37	96	672.41	989	1955.83	3.18072e-86	2	18.5571	987	1937.27	0.000238954	192	250.356	793	1434.44	0.00642491	NA	NA	1086	2648.35	NA	0.201362	0.00555717	0.0749723
Bcin02g00460.1	1	142.202	1085	2194.02	1.20657e-31	2	73.1007	985	1622.51	1.10202e-15	12	128.349	781	1190.77	2.55341e-20	96	496.717	989	1697.3	1.4316e-54	2	1.68636	987	1695.61	0.477218	192	303.392	793	1319.12	4.48177e-06	NA	NA	1086	2336.22	NA	0.175232	0.000594916	0.107031
Bcin02g00470.1	1	157.87	1085	2027.8	5.30581e-35	2	50.7879	985	1480.2	4.80928e-11	12	82.2266	781	1177.03	9.70701e-12	96	495.377	989	1532.42	2.45139e-54	2	1.42816	987	1530.99	0.534615	192	220.945	793	1259.26	0.110333	NA	NA	1086	2185.67	NA	0.184672	0.000532406	0.082366
Bcin02g00480.1	1	77.7944	1085	1757.26	7.10071e-18	2	8.10047	985	1468.92	0.026571	12	9.8725	781	1183.84	0.650259	96	263.105	989	1494.16	2.90477e-17	2	17.1319	987	1477.03	0.000458137	192	275.211	793	1193.71	0.000287557	NA	NA	1086	1835.06	NA	0.124382	0.00809908	0.130105
Bcin02g00490.1	1	0.161492	1085	2214.26	0.732945	2	140.615	985	1516.53	8.42927e-30	12	80.3175	781	1181.29	2.14886e-11	96	492.477	989	1721.79	7.80526e-54	2	64.6402	987	1657.15	9.86919e-14	192	254.926	793	1261.61	0.00378136	NA	NA	1086	2214.43	NA	0.17769	0.0233228	0.0919797
Bcin02g00500.1	1	6.75698	1085	2229.2	0.0150044	2	39.8204	985	1381.97	9.04322e-09	12	62.2375	781	1079.1	3.37522e-08	96	802.012	989	1427.19	1.35317e-110	2	5.40598	987	1421.79	0.091634	192	240.633	793	1141.33	0.0183049	NA	NA	1086	2235.96	NA	0.263527	0.00177631	0.0790677
Bcin02g00520.1	1	2.45117	1085	1313.53	0.153843	2	4.56328	985	1158.11	0.130352	12	6.3514	781	977.458	0.902886	96	148.341	989	1165.19	0.000551545	2	2.51006	987	1162.68	0.333362	192	174.302	793	983.81	0.913124	NA	NA	1086	1315.98	NA	0.10113	0.00171122	0.118829
Bcin02g00530.1	1	59.6063	1085	1419.58	5.53899e-14	2	14.9769	985	1087.35	0.00111377	12	29.5936	781	845.741	0.00537868	96	314.254	989	1105.32	1.10832e-24	2	3.00001	987	1102.32	0.268055	192	212.011	793	875.335	0.210407	NA	NA	1086	1479.18	NA	0.174932	0.00166998	0.118017
Bcin02g00540.1	1	57.1973	1085	2352.69	1.81539e-13	2	105.393	985	1543.68	1.94765e-22	12	69.0337	781	1176.77	2.19639e-09	96	522.006	989	1830.69	5.44833e-59	2	181.617	987	1649.07	4.70734e-38	192	297.867	793	1245.81	1.05896e-05	NA	NA	1086	2409.89	NA	0.167658	0.0583319	0.0956692	prolyl oligopeptidase [Botrytis cinerea T4]	P:metabolic process; F:hydrolase activity
Bcin02g00570.1	1	42.703	1085	1745.78	2.38612e-10	2	21.7311	985	1495.91	4.7438e-05	12	41.1014	781	1207.71	0.000108808	96	214.424	989	1531.36	6.84262e-11	2	13.7204	987	1517.64	0.002155	192	247.099	793	1248.81	0.0092592	NA	NA	1086	1788.49	NA	0.106328	0.00680361	0.122531
Bcin02g00620.1	1	4.38188	1085	1184.59	0.0527816	2	7.97062	985	862.029	0.0281498	12	17.2264	781	658.513	0.170256	96	291.435	989	893.156	2.68003e-21	2	23.1564	987	870	2.83041e-05	192	186.29	793	675.739	0.708758	NA	NA	1086	1188.97	NA	0.193829	0.015401	0.123899
Bcin02g00630.1	1	3.68757	1085	1919.36	0.0770775	2	38.1711	985	1564.14	1.98217e-08	12	85.4033	781	1182.69	2.61039e-12	96	291.65	989	1627.71	2.49317e-21	2	25.4021	987	1602.31	1.00596e-05	192	296.043	793	1268.1	1.40205e-05	NA	NA	1086	1923.05	NA	0.130195	0.0113397	0.132156
Bcin02g00640.1	1	0.686894	1085	1677.9	0.467672	2	18.577	985	1431.85	0.000208803	12	36.4102	781	1185.14	0.000565708	96	201.062	989	1476.84	2.67041e-09	2	26.4173	987	1450.42	6.24845e-06	192	210.3	793	1221.55	0.235108	NA	NA	1086	1678.59	NA	0.105485	0.0138596	0.110332
Bcin02g00660.1	1	1.24526	1085	1722.66	0.31907	2	1.15777	985	1466.57	0.599045	12	14.6626	781	1207.91	0.294976	96	245.906	989	1476.75	6.40809e-15	2	9.02251	987	1467.73	0.0181981	192	244.003	793	1222.57	0.0128763	NA	NA	1086	1723.9	NA	0.124268	0.00455951	0.123307
Bcin02g00670.1	1	7.67077	1085	2040.14	0.00934268	2	17.861	985	1592.57	0.000291737	12	38.0917	781	1278.88	0.000315313	96	401.418	989	1638.73	1.89456e-38	2	28.2961	987	1610.43	2.61078e-06	192	275.6	793	1316.97	0.00027292	NA	NA	1086	2047.81	NA	0.162024	0.0114211	0.11124
Bcin02g00680.1	1	1.46356	1085	743.092	0.277839	2	9.62012	985	583.752	0.0132354	12	14.2357	781	434.778	0.32019	96	144.818	989	598.274	0.0010654	2	4.90177	987	593.373	0.114857	192	134.739	793	449.013	1	NA	NA	1086	744.556	NA	0.161939	0.00548128	0.150668
Bcin02g00710.1	1	37.8137	1085	2131.02	2.68229e-09	2	67.3744	985	1625.79	1.7063e-14	12	112.523	781	1254.65	2.54452e-17	96	397.62	989	1733.4	7.95663e-38	2	40.2347	987	1693.17	9.80219e-09	192	258.619	793	1367.17	0.00242852	NA	NA	1086	2168.84	NA	0.152538	0.0154352	0.0992137
Bcin02g00720.1	1	48.307	1085	1421.75	1.48079e-11	2	18.7945	985	1098.77	0.000188853	12	25.365	781	881.673	0.019769	96	303.479	989	1118.28	4.51493e-23	2	0.713644	987	1117.56	0.732977	192	191.729	793	907.038	0.594221	NA	NA	1086	1470.06	NA	0.171046	0.000402222	0.108062
Bcin02g00740.1	1	91.5175	1085	1997.37	8.20214e-21	2	18.8493	985	1611.09	0.000184057	12	99.6528	781	1214.33	6.33011e-15	96	365.643	989	1631.73	1.16585e-32	2	1.79247	987	1629.94	0.455773	192	297.108	793	1313.98	1.19398e-05	NA	NA	1086	2088.89	NA	0.148858	0.000729735	0.120956
Bcin02g00750.1	1	4.09964	1085	1440.56	0.0614716	2	9.69685	985	1144.75	0.0127662	12	23.5903	781	887.762	0.0329613	96	268.556	989	1172.01	5.0591e-18	2	17.5597	987	1154.45	0.000377146	192	233.4	793	911.352	0.037566	NA	NA	1086	1444.66	NA	0.155165	0.0101456	0.134853
Bcin02g00760.1	1	3.17364	1085	983.034	0.102308	2	5.32151	985	875.912	0.092345	12	7.02497	781	727.992	0.863962	96	98.123	989	884.911	0.424707	2	3.67792	987	881.233	0.197988	192	140.895	793	735.017	1	NA	NA	1086	986.208	NA	0.0901859	0.00338041	0.129498
Bcin02g00770.1	1	11.3813	1085	1253.36	0.00142129	2	3.5457	985	1057.52	0.205697	12	16.6448	781	874.997	0.193681	96	163.576	989	1089.79	2.46704e-05	2	28.7201	987	1061.07	2.14489e-06	192	165.88	793	891.642	0.994248	NA	NA	1086	1264.75	NA	0.112266	0.0197112	0.113847
Bcin02g00780.1	1	89.8608	1085	2104.15	1.86352e-20	2	104.268	985	1605.46	3.30697e-22	12	106.599	781	1232.85	3.27277e-16	96	389.954	989	1714.19	1.41012e-36	2	4.46661	987	1709.73	0.139258	192	266.007	793	1339.45	0.000972923	NA	NA	1086	2194.01	NA	0.150653	0.00172561	0.102768
Bcin02g00790.1	1	13.835	1085	1903.99	0.000412139	2	49.3543	985	1549.51	9.52726e-11	12	57.6728	781	1211.87	2.07492e-07	96	303.498	989	1600.5	4.48683e-23	2	1.63697	987	1598.86	0.487519	192	279.959	793	1269.55	0.000148953	NA	NA	1086	1917.83	NA	0.136528	0.000736391	0.125939
Bcin02g00800.1	1	7.34399	1085	2455.6	0.0110527	2	151.289	985	1599.31	4.79967e-32	12	87.6223	781	1176.87	1.02616e-12	96	686.138	989	1769.47	9.08067e-89	2	18.8713	987	1750.59	0.000206783	192	334.81	793	1264.5	1.97095e-08	NA	NA	1086	2462.95	NA	0.216587	0.00595693	0.105686
Bcin02g00810.1	1	2.72025	1085	1357.19	0.132205	2	22.8883	985	1112.65	2.74725e-05	12	33.6867	781	868.961	0.00142507	96	200.74	989	1156.45	2.91197e-09	2	20.9112	987	1135.54	8.07414e-05	192	210.006	793	902.647	0.23947	NA	NA	1086	1359.91	NA	0.126925	0.0132219	0.132784
Bcin02g00820.1	1	1.97927	1085	1946.82	0.202957	2	47.7302	985	1489.16	2.07506e-10	12	67.9211	781	1151.02	3.42426e-09	96	379.059	989	1567.76	8.24572e-35	2	30.8702	987	1536.89	7.85168e-07	192	270.219	793	1218.94	0.000558392	NA	NA	1086	1948.8	NA	0.160705	0.0130876	0.114561
Bcin02g00830.1	1	21.0116	1085	2304.58	1.1236e-05	2	12.5052	985	1498.52	0.00351954	12	58.5336	781	1182.66	1.47252e-07	96	793.028	989	1511.55	6.94818e-109	2	0.534141	987	1511.02	0.79242	192	257.322	793	1241.19	0.00283264	NA	NA	1086	2325.59	NA	0.254244	0.000171245	0.0824973
Bcin02g00840.1	1	24.3358	1085	1955.54	2.13006e-06	2	71.8496	985	1447.21	1.99968e-15	12	45.1138	781	1164.63	2.52964e-05	96	426.31	989	1529.23	1.44442e-42	2	10.1654	987	1519.06	0.0108928	192	237.467	793	1209.74	0.0252155	NA	NA	1086	1979.87	NA	0.176427	0.00420693	0.0982753
Bcin02g00850.1	1	2.02144	1085	2157.45	0.197975	2	42.2841	985	1622.44	2.79897e-09	12	92.5847	781	1262.98	1.25808e-13	96	444.604	989	1712.85	1.21697e-45	2	48.1263	987	1664.72	2.37227e-10	192	266.872	793	1355.57	0.000869856	NA	NA	1086	2159.48	NA	0.167636	0.0181458	0.100623
Bcin02g00850.2	1	1.3981	1085	2258.77	0.2893	2	50.6113	985	1671.12	5.23585e-11	12	85.5292	781	1275.68	2.478e-12	96	497.775	989	1760.99	9.38137e-55	2	39.2573	987	1721.73	1.54888e-08	192	309.912	793	1361.21	1.55161e-06	NA	NA	1086	2260.17	NA	0.177955	0.0140345	0.110794
Bcin02g00860.1	1	33.5376	1085	1622.49	2.24165e-08	2	10.5021	985	1071.85	0.0088261	12	58.6266	781	789.039	1.41856e-07	96	524.842	989	1097.65	1.72651e-59	2	15.2946	987	1082.35	0.00105841	192	224.187	793	847.665	0.0849422	NA	NA	1086	1656.03	NA	0.238981	0.00696422	0.102081
Bcin02g00870.1	1	42.4356	1085	1566.58	2.7193e-10	2	14.0782	985	1305.72	0.00169155	12	33.4714	781	1083.27	0.00152958	96	237.159	989	1329.42	9.16165e-14	2	9.62176	987	1319.8	0.013865	192	188.983	793	1116.74	0.651551	NA	NA	1086	1609.02	NA	0.127793	0.0051847	0.101834
Bcin02g00880.1	1	7.60874	1085	2153.78	0.00964533	2	28.2171	985	1603.22	2.25084e-06	12	91.7162	781	1214.31	1.81219e-13	96	427.493	989	1726.28	9.16311e-43	2	94.8457	987	1631.44	5.89094e-20	192	297.193	793	1306.03	1.17798e-05	NA	NA	1086	2161.39	NA	0.159291	0.0353411	0.110739
Bcin02g00880.2	1	5.46998	1085	2085.88	0.02956	2	12.6394	985	1589.19	0.00330611	12	97.0559	781	1209.57	1.90261e-14	96	409.961	989	1675.92	7.46159e-40	2	74.0866	987	1601.83	1.13398e-15	192	282.567	793	1306.62	0.0001026	NA	NA	1086	2091.35	NA	0.159184	0.0287671	0.109718
Bcin02g00880.3	1	0.669766	1085	2125.51	0.473815	2	35.2725	985	1638.85	7.93719e-08	12	114.539	781	1228.53	1.06912e-17	96	358.693	989	1766.82	1.47436e-31	2	92.6971	987	1674.12	1.6435e-19	192	295.773	793	1343.07	1.45665e-05	NA	NA	1086	2126.18	NA	0.139159	0.035963	0.114749
Bcin02g00890.1	1	0.599847	1085	1976.96	0.499362	2	8.50159	985	1378.35	0.0221315	12	23.0504	781	1118.82	0.0383925	96	576.983	989	1399.98	8.99128e-69	2	13.1273	987	1386.85	0.00281597	192	236.479	793	1141.87	0.0277663	NA	NA	1086	1977.56	NA	0.224711	0.00511254	0.0920985
Bcin02g00900.1	1	16.3143	1085	2133.04	0.000118047	2	17.5584	985	1512.58	0.00033658	12	95.1446	781	1175.43	4.2799e-14	96	579.562	989	1553.48	3.1025e-69	2	23.3421	987	1530.13	2.60044e-05	192	242.004	793	1270.57	0.0158454	NA	NA	1086	2149.35	NA	0.210577	0.00848108	0.0879294
Bcin02g00910.1	1	19.6854	1085	2026.29	2.17337e-05	2	24.9588	985	1549	1.04306e-05	12	74.1872	781	1223.33	2.6926e-10	96	434.825	989	1591.46	5.43831e-44	2	17.5058	987	1573.96	0.000386539	192	251.484	793	1297.52	0.0056285	NA	NA	1086	2045.97	NA	0.174048	0.00700706	0.100662
Bcin02g00920.1	1	0.0119008	1085	1514.1	0.927923	2	4.0371	985	1320.44	0.165242	12	17.2627	781	1076.48	0.168931	96	179.503	989	1334.6	6.4349e-07	2	10.1195	987	1324.48	0.011114	192	226.695	793	1093.74	0.0687539	NA	NA	1086	1514.11	NA	0.105358	0.00593961	0.133058
Bcin02g00950.1	1	5.96218	1085	990.23	0.0227905	2	0.653805	985	905.268	0.749071	12	10.2194	781	727.304	0.621771	96	83.3634	989	906.866	0.818771	2	0.944121	987	905.922	0.661251	192	167.745	793	737.524	0.980841	NA	NA	1086	996.192	NA	0.0771526	0.000873782	0.155248
Bcin02g00950.2	1	4.28843	1085	1005.66	0.0555342	2	6.28772	985	892.764	0.0600043	12	10.341	781	721.882	0.611636	96	105.629	989	900.027	0.24016	2	0.975561	987	899.052	0.652727	192	160.541	793	732.223	1	NA	NA	1086	1009.94	NA	0.0946028	0.000873729	0.143783
Bcin02g00960.1	1	5.54757	1085	2114.18	0.0283801	2	59.6511	985	1574.24	6.87285e-13	12	55.7843	781	1255.26	4.34737e-07	96	444.935	989	1669.24	1.07004e-45	2	35.3522	987	1633.89	9.68685e-08	192	263.199	793	1311.04	0.00139274	NA	NA	1086	2119.72	NA	0.171128	0.0135969	0.10123
Bcin02g00990.1	1	1.34131	1085	1858.83	0.300029	2	0.893513	985	1520.85	0.673276	12	28.1988	781	1197.34	0.00836737	96	331.227	989	1527.6	2.87128e-27	2	5.85319	987	1521.75	0.0751176	192	295.312	793	1225.54	1.55653e-05	NA	NA	1086	1860.17	NA	0.150746	0.00266387	0.134401
Bcin02g01000.1	1	13.2028	1085	1645.72	0.000566247	2	0.589385	985	1453.11	0.770402	12	27.321	781	1174.13	0.0109677	96	167.157	989	1478.56	1.12348e-05	2	24.8622	987	1453.7	1.29242e-05	192	251.657	793	1201.45	0.00552376	NA	NA	1086	1658.92	NA	0.0903094	0.0134322	0.135961
Bcin02g01010.1	1	245.46	1085	2308.66	9.53246e-54	2	57.1219	985	1507.8	2.34073e-12	12	40.0737	781	1195.71	0.000157158	96	733.702	989	1574.96	1.13783e-97	2	10.0395	987	1564.92	0.0115113	192	272.017	793	1235.78	0.000441366	NA	NA	1086	2554.12	NA	0.222478	0.00304424	0.0824826
Bcin02g01020.1	1	12.8916	1085	1849.81	0.000663424	2	13.3947	985	1469	0.00232416	12	10.5979	781	1169.36	0.590242	96	363.853	989	1485.96	2.24742e-32	2	3.56145	987	1482.4	0.208739	192	289.051	793	1179.95	3.98995e-05	NA	NA	1086	1862.7	NA	0.163154	0.00159698	0.129612
Bcin02g01030.1	1	61.7639	1085	1800.32	1.91317e-14	2	7.33102	985	1510.99	0.0375276	12	33.5668	781	1249.88	0.00148162	96	262.424	989	1537.89	3.61176e-17	2	19.5753	987	1518.32	0.000149346	192	227.542	793	1283.45	0.0639186	NA	NA	1086	1862.08	NA	0.122395	0.00912991	0.106125
Bcin02g01040.1	1	27.2977	1085	837.414	4.8937e-07	2	2.61042	985	698.787	0.314316	12	21.9493	781	534.605	0.0518993	96	135.93	989	701.485	0.00502093	2	0.0872559	987	701.397	0.963015	192	142.232	793	556.555	1	NA	NA	1086	864.712	NA	0.135831	8.71924e-05	0.142129
Bcin02g01060.1	1	231.135	1085	2026.03	1.11795e-50	2	15.1232	985	1477.39	0.00103965	12	20.5364	781	1143.49	0.0755149	96	371.06	989	1654.97	1.5959e-33	2	162.463	987	1492.51	5.14867e-34	192	313.365	793	1164.02	8.85454e-07	NA	NA	1086	2257.17	NA	0.132963	0.0582159	0.11229	nucleoside diphosphate kinase [Botrytis cinerea 1]	F:nucleotide binding; F:ATP binding; P:UTP biosynthetic process; P:CTP biosynthetic process; P:GTP biosynthetic process; P:nucleoside diphosphate phosphorylation; F:nucleoside diphosphate kinase activity; P:phosphorylation; F:transferase activity; F:kinase activity
Bcin02g01070.1	1	69.5045	1085	2016.37	4.23585e-16	2	14.8812	985	1515.9	0.00116485	12	57.8191	781	1222.66	1.95806e-07	96	484.565	989	1531.8	1.82288e-52	2	1.01997	987	1530.78	0.639639	192	235.426	793	1280.48	0.0307945	NA	NA	1086	2085.87	NA	0.18844	0.000396649	0.0915534
Bcin02g01080.1	1	168.231	1085	1661.05	3.19678e-37	2	28.3686	985	1293.49	2.09615e-06	12	79.888	781	1005.74	2.56045e-11	96	337.645	989	1323.4	2.92949e-28	2	1.54267	987	1321.86	0.508393	192	207.863	793	1085.63	0.272361	NA	NA	1086	1829.28	NA	0.155707	0.000711411	0.0958569
Bcin02g01090.1	1	5.111	1085	1848.94	0.035762	2	27.9652	985	1543.32	2.53722e-06	12	37.6354	781	1209.34	0.000369752	96	267.001	989	1581.94	8.34639e-18	2	10.6503	987	1571.29	0.00874945	192	296.343	793	1246.98	1.33742e-05	NA	NA	1086	1854.05	NA	0.125252	0.00499615	0.139017
Bcin02g01120.1	1	0.448211	1085	1117.88	0.560679	2	1.82882	985	970.645	0.445954	12	11.6097	781	776.223	0.507345	96	143.226	989	974.651	0.0014216	2	2.17772	987	972.473	0.385706	192	182.812	793	787.833	0.77838	NA	NA	1086	1118.33	NA	0.113336	0.00172325	0.144661
Bcin02g01130.1	1	5.14386	1085	1179.9	0.0351425	2	25.9242	985	854.429	6.64106e-06	12	66.0015	781	615.754	7.43677e-09	96	291.215	989	888.689	2.88646e-21	2	8.33554	987	880.354	0.0247426	192	172.673	793	681.756	0.934539	NA	NA	1086	1185.05	NA	0.196157	0.00561467	0.11631
Bcin02g01150.1	1	60.2389	1085	1434.8	4.06035e-14	2	18.4856	985	989.522	0.000217824	12	40.0392	781	736.816	0.000158976	96	424.206	989	1010.59	3.21728e-42	2	2.58514	987	1008.01	0.322285	192	212.666	793	776.855	0.201458	NA	NA	1086	1495.04	NA	0.220731	0.00134514	0.110658
Bcin02g01160.1	1	34.627	1085	1738.44	1.31048e-08	2	5.26007	985	1390.16	0.0949153	12	30.2073	781	1141.41	0.00443143	96	309.048	989	1429.39	6.67651e-24	2	33.9728	987	1395.42	1.83344e-07	192	218.538	793	1171.62	0.132729	NA	NA	1086	1773.07	NA	0.146047	0.0160546	0.103275
Bcin02g01170.1	1	5.49405	1085	1651.04	0.0291846	2	18.1539	985	1382.91	0.00025374	12	34.4056	781	1086.12	0.00112169	96	243.027	989	1408.01	1.54941e-14	2	6.94813	987	1401.06	0.0460348	192	262.382	793	1120.53	0.00153855	NA	NA	1086	1656.53	NA	0.127472	0.00364443	0.137624
Bcin02g01210.1	1	0.00100913	1085	1459.9	0.979789	2	5.10474	985	1293.97	0.101902	12	18.8573	781	1087.14	0.115679	96	152.204	989	1307.69	0.000261226	2	8.617	987	1299.08	0.0218173	192	187.97	793	1106	0.672539	NA	NA	1086	1459.9	NA	0.0939114	0.00531678	0.115979
Bcin02g01230.1	1	93.256	1085	1233.73	3.47013e-21	2	63.5459	985	918.186	1.05766e-13	12	36.7515	781	679.898	0.000503217	96	246.12	989	987.61	6.0017e-15	2	5.87813	987	981.732	0.0743663	192	201.537	793	716.649	0.386385	NA	NA	1086	1326.99	NA	0.155872	0.00372273	0.127637
Bcin02g01250.1	1	9.21252	1085	1448.1	0.00424168	2	27.6149	985	1213.55	2.99298e-06	12	31.8282	781	986.887	0.00263502	96	195.962	989	1252.14	1.02649e-08	2	10.9779	987	1241.16	0.00755621	192	194.834	793	1018.72	0.527049	NA	NA	1086	1457.32	NA	0.117748	0.00659629	0.117069
Bcin02g01260.1	1	184.1	1085	2766.64	1.32621e-40	2	345.798	985	1760.64	1.26021e-72	12	179.529	781	1237.5	3.67197e-30	96	626.131	989	2140.51	1.07076e-77	2	34.0709	987	2106.44	1.74981e-07	192	343.607	793	1417.03	3.64068e-09	NA	NA	1086	2950.74	NA	0.173398	0.00943547	0.0951572
Bcin02g01270.1	1	135.066	1085	1338.05	4.05702e-30	2	37.389	985	1082.31	2.87423e-08	12	40.8269	781	821.497	0.000119887	96	201.79	989	1136.26	2.19844e-09	2	16.5645	987	1119.7	0.00059232	192	219.983	793	862.324	0.11874	NA	NA	1086	1473.12	NA	0.119298	0.00979296	0.130054
Bcin02g01280.1	1	57.5617	1085	1971.77	1.51815e-13	2	69.7381	985	1595.52	5.47825e-15	12	91.1023	781	1233.15	2.34591e-13	96	281.16	989	1690.62	8.24152e-20	2	25.3538	987	1665.26	1.03017e-05	192	271.268	793	1324.25	0.000487786	NA	NA	1086	2029.34	NA	0.120367	0.0108542	0.116133
Bcin02g01290.1	1	6.44079	1085	983.336	0.017724	2	1.79037	985	830.108	0.453577	12	11.1293	781	670.521	0.546482	96	142.779	989	840.557	0.00154008	2	8.65835	987	831.899	0.0214383	192	148.458	793	681.65	1	NA	NA	1086	989.777	NA	0.125112	0.00758696	0.130088
Bcin02g01300.1	1	46.5508	1085	1836.01	3.5283e-11	2	33.02	985	1537.72	2.32359e-07	12	20.8229	781	1223.12	0.0701392	96	226.853	989	1609.16	1.94981e-12	2	38.4123	987	1570.74	2.31677e-08	192	293.785	793	1243.94	1.97989e-05	NA	NA	1086	1882.56	NA	0.10562	0.0178843	0.136783
Bcin02g01310.1	1	3.76494	1085	1561.17	0.0739241	2	0.47079	985	1403.06	0.812668	12	14.1468	781	1157.3	0.325593	96	152.758	989	1408.42	0.000234144	2	4.8867	987	1403.53	0.11561	192	231.608	793	1171.45	0.0444443	NA	NA	1086	1564.94	NA	0.0886795	0.00283684	0.134454
Bcin02g01320.1	1	20.4773	1085	1483.1	1.46269e-05	2	4.89778	985	1252.3	0.111985	12	35.8175	781	1017.41	0.000693069	96	202.779	989	1280.32	1.68643e-09	2	23.1254	987	1257.2	2.8698e-05	192	199.077	793	1053.22	0.436718	NA	NA	1086	1503.58	NA	0.117248	0.0133713	0.115108
Bcin02g01330.1	1	0.245737	1085	1166.5	0.671442	2	2.34326	985	1035.9	0.354323	12	34.9829	781	833.925	0.000921264	96	117.474	989	1049.03	0.0704565	2	10.7812	987	1038.24	0.00825423	192	166.993	793	868.908	0.986601	NA	NA	1086	1166.75	NA	0.0907136	0.00832525	0.128952
Bcin02g01340.1	1	4.35719	1085	1282.09	0.0535101	2	3.95968	985	1149.76	0.171259	12	9.87308	781	961.97	0.650259	96	118.583	989	1163.51	0.0615546	2	9.7888	987	1153.72	0.0128864	192	177.917	793	971.843	0.862069	NA	NA	1086	1286.45	NA	0.0838147	0.00691876	0.125752
Bcin02g01350.1	1	77.7368	1085	1665.84	7.30114e-18	2	12.9758	985	1412.55	0.00282893	12	27.6212	781	1176.23	0.00999964	96	189.089	989	1476.75	6.02964e-08	2	51.2266	987	1425.53	5.45095e-11	192	208.699	793	1203.85	0.259308	NA	NA	1086	1743.58	NA	0.095312	0.0258213	0.105197
Bcin02g01360.1	1	65.3945	1085	1916.3	3.17812e-15	2	14.097	985	1535.08	0.00167776	12	56.777	781	1224.09	2.95224e-07	96	292.644	989	1623.66	1.78233e-21	2	74.478	987	1549.18	9.39439e-16	192	254.221	793	1280.86	0.00410817	NA	NA	1086	1981.7	NA	0.124592	0.0317087	0.108234
Bcin02g01370.1	1	59.1427	1085	2008.26	6.94961e-14	2	26.7476	985	1622.96	4.49015e-06	12	29.2418	781	1275.21	0.00601616	96	350.522	989	1657.74	2.86085e-30	2	8.02406	987	1649.71	0.0284376	192	318.512	793	1304.45	3.65417e-07	NA	NA	1086	2067.4	NA	0.144489	0.0033076	0.131294
Bcin02g01380.1	1	3.26104	1085	1087.18	0.0976496	2	0.894056	985	937.039	0.673246	12	16.181	781	737.95	0.214158	96	137.156	989	950.022	0.00408897	2	12.0887	987	937.934	0.00454458	192	182.908	793	754.131	0.776448	NA	NA	1086	1090.44	NA	0.110638	0.00975147	0.147544
Bcin02g01390.1	1	20.0483	1085	1826.3	1.81303e-05	2	24.6909	985	1529.72	1.18333e-05	12	30.2668	781	1206.41	0.00434561	96	269.438	989	1556.86	3.80395e-18	2	2.45465	987	1554.41	0.341737	192	293.043	793	1236.67	2.21431e-05	NA	NA	1086	1846.35	NA	0.127199	0.00115882	0.138343
Bcin02g01420.1	1	61.172	1085	1791.3	2.55961e-14	2	4.13298	985	1123.94	0.158248	12	45.6864	781	795.854	2.04201e-05	96	660.894	989	1130.41	4.31769e-84	2	2.33296	987	1128.07	0.360594	192	282.4	793	841.541	0.000104798	NA	NA	1086	1852.47	NA	0.262708	0.000927363	0.112255
Bcin02g01430.1	1	67.2602	1085	2018.66	1.26737e-15	2	1.80805	985	1579.52	0.450177	12	60.898	781	1209.45	5.74992e-08	96	361.987	989	1656.67	4.44446e-32	2	75.3459	987	1581.32	6.26652e-16	192	309.167	793	1270.35	1.75526e-06	NA	NA	1086	2085.92	NA	0.143461	0.0298606	0.122527
Bcin02g01440.1	1	0.330622	1085	2856.54	0.61962	2	210.889	985	1770.11	1.53789e-44	12	324.122	781	1189.76	7.40091e-59	96	807.476	989	2049.07	1.24519e-111	2	68.0732	987	1981	1.94183e-14	192	256.226	793	1513.88	0.00323614	NA	NA	1086	2856.88	NA	0.216341	0.0182383	0.0686487
Bcin02g01450.1	1	19.523	1085	1417.53	2.35772e-05	2	62.2491	985	1164.53	1.97464e-13	12	21.0035	781	953.728	0.0669419	96	182.048	989	1235.48	3.46674e-07	2	8.69685	987	1226.78	0.021059	192	189.802	793	974.731	0.635483	NA	NA	1086	1437.05	NA	0.111837	0.00534272	0.116601
Bcin02g01460.1	1	114.177	1085	1544.21	1.17569e-25	2	34.6423	985	1223.13	1.06892e-07	12	30.9943	781	974.382	0.00344484	96	280.464	989	1263.74	1.03637e-19	2	5.97401	987	1257.77	0.0712521	192	217.753	793	1005.38	0.140645	NA	NA	1086	1658.39	NA	0.14421	0.00307175	0.111965
Bcin02g01470.1	1	152.078	1085	3118.37	9.28888e-34	2	71.7537	985	1215.96	2.09612e-15	12	96.2031	781	916.658	2.74036e-14	96	1823.06	989	1295.31	1.8621315921209e-314	2	7.59547	987	1287.71	0.034441	192	203.099	793	1012.86	0.356484	NA	NA	1086	3270.45	NA	0.357386	0.00148898	0.0398147		F:protein binding; P:transmembrane transport; C:membrane; F:metal ion transmembrane transporter activity; P:metal ion transport
Bcin02g01480.1	1	4.62611	1085	1050.25	0.0463522	2	8.9561	985	851.756	0.0179752	12	17.6043	781	667.267	0.15625	96	180.134	989	870.118	5.52584e-07	2	9.40577	987	860.712	0.015267	192	166.884	793	684.872	0.987156	NA	NA	1086	1054.88	NA	0.144754	0.00755836	0.134106
Bcin02g01490.1	1	140.844	1085	1486.88	2.35515e-31	2	10.6123	985	1157.21	0.00838782	12	58.1831	781	872.551	1.69306e-07	96	293.064	989	1193.82	1.54728e-21	2	25.9968	987	1167.82	7.60726e-06	192	226.474	793	930.734	0.0700471	NA	NA	1086	1627.73	NA	0.150537	0.0133537	0.116332
Bcin02g01510.1	1	1.37026	1085	1485.36	0.294602	2	6.39055	985	1307.49	0.057315	12	18.047	781	1060.31	0.140944	96	160.94	989	1324.42	4.34861e-05	2	10.5481	987	1313.88	0.00916016	192	229.129	793	1078.36	0.055626	NA	NA	1086	1486.73	NA	0.0970558	0.00636111	0.138177
Bcin02g01520.1	1	28.6034	1085	1950.58	2.56424e-07	2	28.652	985	1513.69	1.83355e-06	12	21.2987	781	1201.89	0.0618842	96	391.324	989	1559.25	8.45165e-37	2	16.913	987	1542.34	0.000505899	192	290.496	793	1223.19	3.2275e-05	NA	NA	1086	1979.18	NA	0.163911	0.00708421	0.121678
Bcin02g01530.1	1	14.4257	1085	1723.26	0.000306796	2	10.9417	985	1372.63	0.00722348	12	23.4444	781	1126.57	0.0343269	96	295.752	989	1427.51	6.25287e-22	2	43.9379	987	1383.57	1.71244e-09	192	222.61	793	1150.02	0.0965914	NA	NA	1086	1737.68	NA	0.142368	0.0211507	0.107159
Bcin02g01540.1	1	54.6455	1085	2019.77	6.44311e-13	2	57.5485	985	1558.26	1.91068e-12	12	31.6412	781	1292.05	0.0027961	96	403.749	989	1616.02	7.85914e-39	2	0.213838	987	1615.81	0.910962	192	234.573	793	1323.69	0.0334678	NA	NA	1086	2074.42	NA	0.162908	8.62814e-05	0.0946478
Bcin02g01550.1	1	1.4121	1085	1913.8	0.286863	2	21.316	985	1502.7	5.78096e-05	12	29.3405	781	1202.5	0.00583346	96	360.66	989	1553.14	7.21029e-32	2	29.1272	987	1524.01	1.77242e-06	192	270.853	793	1231.84	0.000514815	NA	NA	1086	1915.21	NA	0.156469	0.0126365	0.117507
Bcin02g01560.1	1	6.38	1085	1682.66	0.0182912	2	4.51984	985	1423.67	0.13305	12	10.0219	781	1183.38	0.63767	96	204.701	989	1477.96	1.00514e-09	2	49.7712	987	1428.19	1.08533e-10	192	230.269	793	1193.4	0.0501352	NA	NA	1086	1689.04	NA	0.105326	0.0256089	0.118481
Bcin02g01580.1	1	7.29069	1085	1885.32	0.0113653	2	112.603	985	1390.21	6.06991e-24	12	46.9612	781	1134.43	1.27145e-05	96	305.745	989	1579.57	2.08213e-23	2	76.7658	987	1502.81	3.22609e-16	192	208.813	793	1181.39	0.257664	NA	NA	1086	1892.61	NA	0.134386	0.0337414	0.0917808
Bcin02g01590.1	1	23.9665	1085	1649	2.56498e-06	2	75.306	985	1296.5	3.80377e-16	12	31.6601	781	1022.91	0.00277909	96	231.015	989	1417.99	5.73509e-13	2	46.1808	987	1371.81	5.96952e-10	192	241.926	793	1054.57	0.015984	NA	NA	1086	1672.97	NA	0.118459	0.0236805	0.124054
Bcin02g01600.1	1	2.66696	1085	899.474	0.13623	2	0.72846	985	674.956	0.724299	12	13.8128	781	516.145	0.347027	96	218.147	989	681.326	2.3909e-11	2	5.6415	987	675.685	0.0825323	192	144.999	793	529.957	1	NA	NA	1086	902.14	NA	0.193749	0.00501053	0.128782
Bcin02g01610.1	1	0.570711	1085	2108.1	0.509772	2	34.4331	985	1558.84	1.18227e-07	12	98.8311	781	1183.91	8.96102e-15	96	494.681	989	1613.42	3.2369e-54	2	20.1461	987	1593.27	0.000115302	192	276.103	793	1282.74	0.000255557	NA	NA	1086	2108.67	NA	0.188558	0.0076791	0.105242
Bcin02g01620.1	1	0.0320621	1085	1094.16	0.880463	2	24.74	985	928.993	1.15816e-05	12	19.9738	781	748.934	0.08746	96	127.415	989	966.744	0.0188496	2	13.0111	987	953.733	0.00296981	192	160.085	793	768.908	1	NA	NA	1086	1094.19	NA	0.103202	0.0105385	0.129664
Bcin02g01630.1	1	75.4246	1085	1993.86	2.26507e-17	2	11.0029	985	1546.63	0.00701992	12	36.2305	781	1238.98	0.000601023	96	430.416	989	1563.44	2.97409e-43	2	5.81428	987	1557.63	0.0764088	192	271.42	793	1275.21	0.000478342	NA	NA	1086	2069.29	NA	0.171787	0.00232059	0.108329
Bcin02g01650.1	1	36.2551	1085	1927.42	5.83763e-09	2	55.4466	985	1480.26	5.22142e-12	12	51.5017	781	1161.09	2.27483e-06	96	381.166	989	1546.25	3.77062e-35	2	10.5466	987	1535.71	0.00916527	192	267.663	793	1212.6	0.000782943	NA	NA	1086	1963.67	NA	0.161828	0.00447766	0.113638
Bcin02g01660.1	1	81.8446	1085	2501.6	9.65228e-19	2	198.555	985	1563.6	5.73573e-42	12	113.695	781	1170.4	1.53674e-17	96	735.665	989	1765.94	4.85856e-98	2	3.77559	987	1762.16	0.189415	192	279.514	793	1284.09	0.000158286	NA	NA	1086	2583.44	NA	0.221393	0.00113624	0.0841177
Bcin02g01680.1	1	11.3777	1085	1162.54	0.00142377	2	12.9023	985	938.441	0.00292719	12	22.2804	781	732.757	0.0474087	96	175.685	989	986.851	1.59482e-06	2	35.5077	987	951.343	9.02936e-08	192	183.404	793	755.037	0.766932	NA	NA	1086	1173.91	NA	0.126838	0.0256354	0.132412
Bcin02g01720.1	1	26.6745	1085	2175.43	6.67715e-07	2	78.8194	985	1566.14	7.0262e-17	12	118.343	781	1190.4	2.05539e-18	96	480.98	989	1694.45	7.57567e-52	2	49.4942	987	1644.96	1.2391e-10	192	257.397	793	1308.74	0.00280451	NA	NA	1086	2202.11	NA	0.176017	0.0181126	0.0941955
Bcin02g01730.1	1	78.0043	1085	1611.87	6.41511e-18	2	11.7751	985	1197.85	0.00492568	12	44.3209	781	851.039	3.38289e-05	96	370.746	989	1241.12	1.79024e-33	2	31.4946	987	1209.63	5.87647e-07	192	302.491	793	895.359	5.14347e-06	NA	NA	1086	1689.87	NA	0.177211	0.015054	0.144586
Bcin02g01740.1	1	9.05644	1085	1551.46	0.00458978	2	7.17621	985	1330.06	0.0402176	12	33.9818	781	1080.61	0.00129336	96	206.812	989	1344.65	5.64953e-10	2	7.4089	987	1337.24	0.0373878	192	215.468	793	1114.6	0.165904	NA	NA	1086	1560.52	NA	0.116531	0.00417464	0.121408
Bcin02g01750.1	1	5.51132	1085	1087.54	0.0289264	2	3.81708	985	954.63	0.182332	12	13.7398	781	778.713	0.351942	96	126.133	989	961.408	0.0226507	2	2.96089	987	958.447	0.272855	192	162.177	793	792.453	1	NA	NA	1086	1093.05	NA	0.103206	0.0024227	0.132699
Bcin02g01760.1	1	0.51874	1085	1735.8	0.530011	2	4.40653	985	1453.15	0.140017	12	27.5163	781	1180.55	0.0103407	96	247.832	989	1487.97	3.53396e-15	2	30.413	987	1457.56	9.71475e-07	192	245.084	793	1208.07	0.0114923	NA	NA	1086	1736.32	NA	0.12302	0.0150965	0.121656
Bcin02g01770.1	1	2.46775	1085	2590.4	0.152486	2	146.547	985	1746.69	4.7374e-31	12	107.076	781	1282.8	2.66866e-16	96	694.427	989	1895.98	2.58822e-90	2	2.73595	987	1893.24	0.301327	192	356.817	793	1389.88	2.55098e-10	NA	NA	1086	2592.87	NA	0.21107	0.000831587	0.108454
Bcin02g01780.1	1	1.4913	1085	2778.71	0.27315	2	125.808	985	1752.32	1.0532e-26	12	145.541	781	1251.48	1.2855e-23	96	848.23	989	1930.48	2.03226e-119	2	52.3576	987	1878.13	3.20921e-11	192	355.297	793	1397.02	3.48608e-10	NA	NA	1086	2780.21	NA	0.230448	0.0142246	0.0965273
Bcin02g01790.1	1	23.077	1085	1920.07	4.0039e-06	2	40.4961	985	1419.85	6.53778e-09	12	30.1788	781	1183.12	0.00447227	96	444.403	989	1475.67	1.31595e-45	2	15.3229	987	1460.35	0.00104451	192	206.557	793	1213.3	0.293873	NA	NA	1086	1943.15	NA	0.184946	0.00637692	0.0859625
Bcin02g01800.1	1	11.2436	1085	1899.55	0.00152218	2	8.98435	985	1594.64	0.0177443	12	37.1674	781	1269.47	0.000435682	96	283.193	989	1616.35	4.21002e-20	2	12.7254	987	1603.63	0.00338524	192	288.009	793	1306.63	4.65482e-05	NA	NA	1086	1910.79	NA	0.128333	0.00576669	0.130515
Bcin02g01810.1	1	114.79	1085	1997.32	8.70458e-26	2	5.66328	985	1409.83	0.079364	12	29.5823	781	1160.36	0.00539668	96	356.903	989	1640.42	2.83418e-31	2	224.93	987	1415.49	4.29888e-47	192	219.884	793	1189.94	0.119665	NA	NA	1086	2112.11	NA	0.132483	0.0834947	0.0816215	benzodiazepine receptor family [Botrytis cinerea T4]	C:membrane; C:integral component of membrane
Bcin02g01820.1	1	69.4793	1085	1598.77	4.28532e-16	2	3.18567	985	1412.75	0.242161	12	31.116	781	1145	0.00330995	96	178.728	989	1420.04	7.74407e-07	2	4.10459	987	1415.93	0.163639	192	236.638	793	1176.11	0.0273295	NA	NA	1086	1668.25	NA	0.0965532	0.0022174	0.127838
Bcin02g01830.1	1	0.000793663	1085	1579.34	0.981542	2	15.7716	985	1389.22	0.000770192	12	7.90887	781	1154.81	0.804868	96	154.753	989	1424.59	0.000157181	2	19.5946	987	1404.99	0.000148205	192	226.501	793	1162.72	0.0699009	NA	NA	1086	1579.34	NA	0.0882443	0.0111734	0.129157
Bcin02g01840.1	1	10.3841	1085	1763.97	0.00234735	2	16.9647	985	1450.95	0.000442596	12	43.6993	781	1165.65	4.25029e-05	96	289.422	989	1474.55	5.27093e-21	2	6.63645	987	1467.92	0.0529677	192	241.605	793	1209.35	0.0165461	NA	NA	1086	1774.36	NA	0.139789	0.00320537	0.116694
Bcin02g01850.1	1	49.4978	1085	1865.51	8.1909e-12	2	53.1883	985	1476.33	1.53667e-11	12	71.8321	781	1199.37	6.98328e-10	96	328.068	989	1537.44	8.77273e-27	2	7.92915	987	1529.51	0.029689	192	205.126	793	1271.2	0.31915	NA	NA	1086	1915.01	NA	0.145743	0.00352249	0.0911264
Bcin02g01870.1	1	42.9594	1085	2989.97	2.09977e-10	2	69.8206	985	1464.21	5.26573e-15	12	22.5236	781	1140.91	0.044343	96	1342.46	989	1647.51	8.74815e-217	2	113.484	987	1534.03	8.06859e-24	192	300.772	793	1163.43	6.71789e-06	NA	NA	1086	3032.93	NA	0.299064	0.0252811	0.0670039
Bcin02g01880.1	1	107.458	1085	3056.94	3.14418e-24	2	31.2247	985	1454.86	5.43986e-07	12	40.7072	781	1068.95	0.000125221	96	1541.34	989	1515.6	5.96345e-257	2	29.5187	987	1486.08	1.47881e-06	192	345.198	793	1109.66	2.7031e-09	NA	NA	1086	3164.4	NA	0.325503	0.00623381	0.0728995
Bcin02g01890.1	1	18.5039	1085	1297.36	3.93551e-05	2	27.7829	985	940.316	2.76519e-06	12	16.9395	781	698.165	0.181625	96	303.571	989	993.787	4.3778e-23	2	25.6888	987	968.099	8.78144e-06	192	225.212	793	715.104	0.0779041	NA	NA	1086	1315.86	NA	0.184528	0.0156151	0.136897
Bcin02g01900.1	1	27.345	1085	1588.2	4.78554e-07	2	15.8747	985	1321.92	0.000735145	12	24.0789	781	1090.91	0.028719	96	237.898	989	1350.31	7.33687e-14	2	12.5084	987	1337.8	0.00373993	192	206.938	793	1114.98	0.28764	NA	NA	1086	1615.55	NA	0.127494	0.0067035	0.110902
Bcin02g01910.1	1	4.88779	1085	1482.71	0.0402923	2	0.595753	985	1283.49	0.768467	12	6.73624	781	1068.28	0.881376	96	166.63	989	1316.08	1.2632e-05	2	31.9995	987	1284.08	4.62412e-07	192	208.47	793	1075.02	0.263078	NA	NA	1086	1487.6	NA	0.0988184	0.0189769	0.123631
Bcin02g01920.1	1	17.7585	1085	1844.88	5.70815e-05	2	28.0182	985	1524.43	2.47326e-06	12	31.9325	781	1225.51	0.00254822	96	252.581	989	1592.3	8.06255e-16	2	39.8528	987	1552.45	1.16829e-08	192	266.989	793	1257.44	0.000856205	NA	NA	1086	1862.64	NA	0.117203	0.0184926	0.123889
Bcin02g01930.1	1	94.2602	1085	1965.67	2.12447e-21	2	45.5109	985	1574.17	6.00818e-10	12	45.966	781	1267.68	1.83891e-05	96	340.228	989	1625.44	1.1621e-28	2	5.76053	987	1619.68	0.0782897	192	260.521	793	1313.65	0.00192283	NA	NA	1086	2059.93	NA	0.141413	0.00239432	0.108283
Bcin02g01940.1	1	4.69491	1085	1070.16	0.0446376	2	7.92539	985	837.942	0.0287352	12	41.1025	781	640.564	0.000108789	96	219.108	989	851.049	1.81841e-11	2	5.18196	987	845.867	0.101533	192	156.275	793	681.667	1	NA	NA	1086	1074.85	NA	0.168656	0.00398876	0.120291
Bcin02g01950.1	1	68.3938	1085	2242.92	7.29949e-16	2	80.3211	985	1665.63	3.42763e-17	12	75.2504	781	1213.57	1.7469e-10	96	473.35	989	1769.57	1.56356e-50	2	23.6155	987	1745.95	2.29078e-05	192	376.816	793	1288.82	3.39057e-12	NA	NA	1086	2311.31	NA	0.168555	0.00840923	0.134181
Bcin02g01960.1	1	20.7534	1085	1026.42	1.27558e-05	2	28.0796	985	833.422	2.40237e-06	12	13.8687	781	639.198	0.343216	96	155.88	989	870.535	0.000124892	2	9.03364	987	861.502	0.0181067	192	180.355	793	653.067	0.820934	NA	NA	1086	1047.17	NA	0.128605	0.00745299	0.148798
Bcin02g01970.1	1	32.0119	1085	1514.22	4.76432e-08	2	0.132657	985	1322.22	0.942728	12	18.0918	781	1079.36	0.139515	96	189.903	989	1324.32	4.90403e-08	2	1.96566	987	1322.35	0.422795	192	224.77	793	1097.45	0.0808773	NA	NA	1086	1546.23	NA	0.109259	0.00113093	0.129319
Bcin02g01980.1	1	36.1228	1085	1863.03	6.23411e-09	2	13.8954	985	1454.74	0.00184495	12	56.9578	781	1212.26	2.7476e-07	96	384.689	989	1478.34	1.01277e-35	2	9.70293	987	1468.64	0.013387	192	185.517	793	1269.22	0.724645	NA	NA	1086	1899.15	NA	0.167727	0.00423054	0.0808867
Bcin02g01990.1	1	6.73817	1085	1796.39	0.0151529	2	0.530212	985	764.666	0.791244	12	43.2834	781	449.27	4.94812e-05	96	1028.26	989	768.125	2.26237e-154	2	2.9287	987	765.196	0.276519	192	272.113	793	492.553	0.000436147	NA	NA	1086	1803.12	NA	0.36279	0.0010333	0.0960066
Bcin02g02000.1	1	20.7794	1085	1194.76	1.25943e-05	2	17.4174	985	985.176	0.000359318	12	11.8898	781	759.91	0.485641	96	190.016	989	1004.74	4.76624e-08	2	2.14692	987	1002.59	0.390894	192	213.376	793	771.8	0.192112	NA	NA	1086	1215.54	NA	0.134983	0.00152513	0.151578
Bcin02g02010.1	1	4.91406	1085	2071.73	0.0397485	2	38.7756	985	1608.19	1.48489e-08	12	127.742	781	1197.07	3.34496e-20	96	410.277	989	1661.45	6.61904e-40	2	14.4929	987	1646.96	0.0015218	192	283.37	793	1324.82	9.14708e-05	NA	NA	1086	2076.65	NA	0.164018	0.00579387	0.113284
Bcin02g02020.1	1	32.2318	1085	1747.87	4.27144e-08	2	1.81322	985	1555.06	0.449217	12	15.5426	781	1265.16	0.246188	96	184.226	989	1563.64	2.03209e-07	2	6.77434	987	1556.87	0.0497131	192	274.349	793	1280.71	0.000322538	NA	NA	1086	1780.1	NA	0.0934634	0.00343683	0.139186
Bcin02g02030.1	1	72.0104	1085	2025.57	1.22678e-16	2	34.0751	985	1613.22	1.40168e-07	12	27.4558	781	1290.21	0.0105301	96	315.671	989	1709.9	6.75519e-25	2	62.6081	987	1647.29	2.60269e-13	192	295.551	793	1317.67	1.50702e-05	NA	NA	1086	2097.58	NA	0.1275	0.0252874	0.119373
Bcin02g02050.1	1	2.31763	1085	1277.3	0.166116	2	11.8814	985	1007.2	0.00469237	12	18.1349	781	774.161	0.138012	96	258.06	989	1019.24	1.44062e-16	2	0.159679	987	1019.08	0.933318	192	214.904	793	792.296	0.172594	NA	NA	1086	1279.62	NA	0.167807	0.000103833	0.139744
Bcin02g02060.1	1	1.13907	1085	916.481	0.342561	2	8.59713	985	812.329	0.0211628	12	16.9494	781	630.413	0.181221	96	93.332	989	823.149	0.560803	2	2.22264	987	820.926	0.378401	192	164.966	793	647.363	0.999875	NA	NA	1086	917.62	NA	0.0921184	0.00219374	0.162821
Bcin02g02090.1	1	10.4018	1085	2227.18	0.00232727	2	33.3023	985	1612.58	2.0298e-07	12	131.221	781	1143.62	7.32372e-21	96	551.813	989	1675.36	2.87376e-64	2	29.4775	987	1645.89	1.50646e-06	192	337.742	793	1274.84	1.1144e-08	NA	NA	1086	2237.58	NA	0.195757	0.0104572	0.119815
Bcin02g02100.1	1	25.1307	1085	1875.25	1.43667e-06	2	55.6219	985	1428.71	4.79907e-12	12	22.2472	781	1084.44	0.0478146	96	381.15	989	1494.1	3.79346e-35	2	9.76694	987	1484.33	0.0130039	192	322.022	793	1106.69	2.02257e-07	NA	NA	1086	1900.38	NA	0.166347	0.00426263	0.140542
Bcin02g02110.1	1	53.8067	1085	1849.15	9.73806e-13	2	30.5729	985	1549.5	7.41001e-07	12	28.2236	781	1250.49	0.00830169	96	264.766	989	1584.39	1.70868e-17	2	4.31685	987	1580.07	0.148919	192	270.787	793	1278.71	0.000519284	NA	NA	1086	1902.96	NA	0.121897	0.00198746	0.124669
Bcin02g02120.1	1	343.757	1085	3077.84	9.00266e-75	2	53.3885	985	1520.08	1.40014e-11	12	55.4797	781	1120.17	4.89437e-07	96	1386.13	989	1691.71	1.45478e-225	2	118.243	987	1573.47	8.22358e-25	192	344.427	793	1175.65	3.09841e-09	NA	NA	1086	3421.6	NA	0.281392	0.024004	0.0699207
Bcin02g02140.1	1	21.076	1085	1675.58	1.0891e-05	2	40.7537	985	1271.54	5.79317e-09	12	38.2072	781	1016.32	0.000302919	96	360.435	989	1315.14	7.82774e-32	2	2.85113	987	1312.29	0.286436	192	217.013	793	1054.52	0.148315	NA	NA	1086	1696.65	NA	0.174974	0.00138408	0.105349
Bcin02g02150.1	1	0.0110597	1085	1914.62	0.930782	2	48.7016	985	1529.3	1.2982e-10	12	69.8487	781	1224.47	1.57986e-09	96	309.416	989	1605.21	5.87894e-24	2	27.2043	987	1578	4.33341e-06	192	234.983	793	1294.32	0.0321336	NA	NA	1086	1914.63	NA	0.137442	0.012084	0.104379
Bcin02g02160.1	1	36.891	1085	1912.2	4.25607e-09	2	12.4349	985	1482.94	0.00363835	12	28.5102	781	1196.54	0.0076013	96	393.58	989	1518.62	3.62927e-37	2	23.2414	987	1495.38	2.72769e-05	192	257.89	793	1225.05	0.00265131	NA	NA	1086	1949.09	NA	0.166355	0.00982344	0.109002
Bcin02g02170.1	1	0.710144	1085	913.175	0.460049	2	3.46101	985	787.259	0.213869	12	13.051	781	620.974	0.399414	96	121.839	989	791.336	0.0407139	2	0.615916	987	790.72	0.764509	192	153.234	793	634.025	1	NA	NA	1086	913.885	NA	0.117567	0.000594318	0.14786
Bcin02g02180.1	1	24.2387	1085	1624.92	2.23827e-06	2	0.12397	985	1394.95	0.945908	12	45.5209	781	1120.81	2.17114e-05	96	171.524	989	1453.4	4.18476e-06	2	58.3199	987	1395.08	1.98275e-12	192	228.627	793	1166.33	0.0580464	NA	NA	1086	1649.16	NA	0.0912844	0.0310377	0.121675
Bcin02g02190.1	1	111.886	1085	1901.33	3.61491e-25	2	24.6393	985	1570.46	1.2112e-05	12	44.582	781	1202.89	3.07441e-05	96	292.474	989	1608.85	1.88684e-21	2	13.7522	987	1595.1	0.0021247	192	322.99	793	1247.47	1.74063e-07	NA	NA	1086	2013.21	NA	0.126097	0.00592912	0.139253
Bcin02g02200.1	1	2.02554	1085	1580.46	0.197495	2	10.8034	985	1369.74	0.00768502	12	23.6084	781	1120.57	0.0328096	96	197.309	989	1383.15	7.20896e-09	2	2.59912	987	1380.55	0.320417	192	225.564	793	1144.18	0.0756338	NA	NA	1086	1582.48	NA	0.110699	0.00145822	0.126552
Bcin02g02210.1	1	47.2377	1085	1865.1	2.51627e-11	2	15.8322	985	1421.63	0.00074919	12	75.5242	781	1161.64	1.56119e-10	96	416.194	989	1448.91	6.94194e-41	2	11.4414	987	1437.47	0.0061184	192	184.474	793	1237.16	0.74535	NA	NA	1086	1912.34	NA	0.177863	0.00488956	0.0788357
Bcin02g02230.1	1	0.593479	1085	871.574	0.501614	2	13.989	985	699.312	0.00176391	12	13.5379	781	531.192	0.365036	96	139.953	989	731.621	0.00253561	2	18.3198	987	713.301	0.000265834	192	154.582	793	544.73	1	NA	NA	1086	872.168	NA	0.135819	0.0177786	0.150015
Bcin02g02240.1	1	164.976	1085	1903.83	1.59207e-36	2	0.683948	985	1502.5	0.739272	12	50.5472	781	1243.16	3.2826e-06	96	397.915	989	1505.92	7.10974e-38	2	2.73655	987	1503.18	0.301275	192	208.793	793	1293.71	0.257936	NA	NA	1086	2068.81	NA	0.161134	0.00110816	0.08455
Bcin02g02250.1	1	69.7411	1085	1851.4	3.76383e-16	2	0.815542	985	1557.05	0.697749	12	9.87503	781	1224.09	0.650174	96	276.992	989	1574.41	3.24463e-19	2	16.543	987	1557.86	0.000597582	192	323.079	793	1233.97	1.71478e-07	NA	NA	1086	1921.14	NA	0.125071	0.00746974	0.145881
Bcin02g02260.1	1	1.82176	1085	1949.75	0.222972	2	23.8208	985	1577.13	1.77955e-05	12	29.674	781	1284.68	0.00524193	96	339.515	989	1610.23	1.49896e-28	2	9.27991	987	1600.95	0.0161881	192	262.775	793	1314.35	0.00146496	NA	NA	1086	1951.57	NA	0.147592	0.00403411	0.114232
Bcin02g02270.1	1	34.0457	1085	1404.76	1.74811e-08	2	6.26544	985	1162.91	0.060631	12	52.6844	781	916.203	1.44626e-06	96	225.818	989	1178.95	2.63753e-12	2	9.77061	987	1169.17	0.0129849	192	194.022	793	968.887	0.544894	NA	NA	1086	1438.81	NA	0.134865	0.0058353	0.115876
Bcin02g02280.1	1	34.0686	1085	1802.61	1.72824e-08	2	2.16948	985	1551.36	0.383041	12	12.8633	781	1252.48	0.412657	96	223.122	989	1579.49	5.76479e-12	2	25.9607	987	1553.53	7.73462e-06	192	286.021	793	1265.34	6.24069e-05	NA	NA	1086	1836.68	NA	0.106974	0.0124466	0.13713
Bcin02g02290.1	1	11.8645	1085	1294.59	0.00111243	2	5.40223	985	1163.89	0.0891489	12	7.71133	781	982.003	0.818637	96	116.281	989	1178.31	0.0811685	2	9.02157	987	1169.29	0.0182	192	174.171	793	989.714	0.914365	NA	NA	1086	1306.45	NA	0.0812153	0.00630106	0.121649
Bcin02g02300.1	1	100.49	1085	2094.61	9.73601e-23	2	79.5434	985	1629.48	4.93595e-17	12	117.047	781	1232.98	3.60837e-18	96	384.196	989	1710.41	1.21696e-35	2	1.39312	987	1709.02	0.542534	192	279.446	793	1350.03	0.000159587	NA	NA	1086	2195.1	NA	0.148873	0.000539824	0.108283
Bcin02g02310.1	1	1.04815	1085	1804.36	0.364232	2	15.475	985	1527.57	0.000883946	12	46.6529	781	1222.07	1.42559e-05	96	254.962	989	1549.4	3.8228e-16	2	6.34653	987	1543.05	0.0604214	192	258.854	793	1268.72	0.00235742	NA	NA	1086	1805.4	NA	0.123366	0.00307083	0.125249
Bcin02g02320.1	1	78.6193	1085	2508.38	4.71778e-18	2	203.687	985	1587.51	4.92345e-43	12	110.22	781	1162.93	6.93339e-17	96	613.405	989	1894.98	2.23721e-75	2	103.785	987	1791.19	8.5141e-22	192	314.36	793	1273.15	7.41982e-07	NA	NA	1086	2587	NA	0.185644	0.03141	0.0951398
Bcin02g02330.1	1	365.63	1085	2190.75	1.78585e-79	2	108.307	985	1673.72	4.74303e-23	12	138.302	781	1224.11	3.20438e-22	96	379.829	989	1810.92	6.19109e-35	2	28.8917	987	1782.03	1.98197e-06	192	311.308	793	1362.42	1.24732e-06	NA	NA	1086	2556.38	NA	0.1281	0.00974389	0.104991
Bcin02g02340.1	1	0.213534	1085	1633.15	0.693378	2	9.82981	985	1413.57	0.0120147	12	36.6072	781	1153.41	0.00052912	96	179.465	989	1453.68	6.49371e-07	2	30.279	987	1423.4	1.03572e-06	192	223.555	793	1190.02	0.0895229	NA	NA	1086	1633.36	NA	0.097371	0.0164283	0.121293
Bcin02g02350.1	1	0.21022	1085	1822.48	0.695757	2	37.9978	985	1444.98	2.14822e-08	12	38.1652	781	1188.85	0.000307326	96	230.013	989	1592.47	7.70579e-13	2	109.485	987	1482.98	5.49718e-23	192	217.972	793	1227.01	0.138406	NA	NA	1086	1822.69	NA	0.10638	0.050636	0.100811
Bcin02g02360.1	1	32.5704	1085	1632	3.61034e-08	2	17.2626	985	1399.22	0.000386514	12	32.946	781	1120.77	0.00182022	96	198.817	989	1433.19	4.84943e-09	2	16.7005	987	1416.49	0.000557048	192	245.511	793	1153.71	0.0109739	NA	NA	1086	1664.58	NA	0.105749	0.00888278	0.130584
Bcin02g02370.1	1	21.7096	1085	1719.53	7.9314e-06	2	5.1684	985	1485.97	0.0989879	12	52.8138	781	1197.12	1.37629e-06	96	226.095	989	1493.43	2.43234e-12	2	2.29549	987	1491.14	0.366545	192	236.04	793	1249.93	0.0290044	NA	NA	1086	1741.24	NA	0.114791	0.00116544	0.11984
Bcin02g02380.1	1	3.54495	1085	1949.78	0.0834596	2	42.9463	985	1478.6	2.04765e-09	12	52.0294	781	1178.86	1.85915e-06	96	404.793	989	1544.98	5.29349e-39	2	23.4349	987	1521.55	2.48993e-05	192	247.709	793	1230.89	0.0086607	NA	NA	1086	1953.32	NA	0.16997	0.00984018	0.104012
Bcin02g02390.1	1	2.15591	1085	1195.25	0.182851	2	0.526693	985	1014.04	0.792373	12	8.64338	781	853.401	0.749934	96	170.798	989	1024.45	4.94188e-06	2	9.88464	987	1014.57	0.0123545	192	151.998	793	862.045	1	NA	NA	1086	1197.41	NA	0.123938	0.00717271	0.110296
Bcin02g02400.1	1	8.6828	1085	1539.66	0.00555152	2	9.40426	985	1354.05	0.0146388	12	19.4824	781	1128.63	0.0989437	96	162.071	989	1377.59	3.41554e-05	2	14.1334	987	1363.46	0.00178574	192	205.942	793	1148.11	0.30454	NA	NA	1086	1548.34	NA	0.093979	0.00819541	0.119418
Bcin02g02410.1	1	9.4344	1085	2004.02	0.00380788	2	88.9128	985	1473.56	5.40355e-19	12	96.4745	781	1130.99	2.43511e-14	96	431.431	989	1572.58	2.01323e-43	2	10.1108	987	1562.47	0.0111539	192	246.096	793	1227.47	0.0103267	NA	NA	1086	2013.45	NA	0.175736	0.00411848	0.100243
Bcin02g02420.1	1	8.87714	1085	1692.68	0.00503075	2	2.56439	985	1453.78	0.320912	12	10.8879	781	1182.01	0.566239	96	233.454	989	1459.23	2.77991e-13	2	2.88829	987	1456.34	0.281777	192	260.879	793	1192.9	0.00184488	NA	NA	1086	1701.56	NA	0.120467	0.00149042	0.134619
Bcin02g02460.1	1	1.77198	1085	1108.85	0.229856	2	1.29517	985	979.766	0.563748	12	33.7015	781	764.182	0.00141834	96	123.783	989	985.064	0.0314073	2	4.00304	987	981.061	0.171059	192	181.882	793	797.883	0.7941	NA	NA	1086	1110.62	NA	0.0999538	0.00323241	0.146868
Bcin02g02470.1	1	0.553454	1085	1960.25	0.516178	2	27.3676	985	1614.18	3.36009e-06	12	73.7031	781	1195.04	3.27199e-10	96	244.094	989	1716.16	1.11653e-14	2	74.6136	987	1641.55	8.87201e-16	192	345.437	793	1268.74	2.58818e-09	NA	NA	1086	1960.81	NA	0.107081	0.0327323	0.15154
Bcin02g02480.1	1	49.1401	1085	2049.73	9.77691e-12	2	83.4025	985	1639.54	7.77966e-18	12	99.9341	781	1252.84	5.61708e-15	96	319.137	989	1730.6	2.01915e-25	2	7.65853	987	1722.94	0.0335394	192	286.759	793	1352.78	5.58043e-05	NA	NA	1086	2098.87	NA	0.131567	0.00315729	0.118218
Bcin02g02490.1	1	30.0651	1085	1872.59	1.25037e-07	2	17.1809	985	1509.12	0.000401402	12	52.7425	781	1255.98	1.41463e-06	96	301.791	989	1570.8	8.02886e-23	2	44.4967	987	1526.3	1.31699e-09	192	200.396	793	1308.72	0.409631	NA	NA	1086	1902.65	NA	0.134193	0.0197856	0.089107
Bcin02g02500.1	1	13.0628	1085	1573.08	0.00060781	2	22.3337	985	1322.5	3.57097e-05	12	20.89	781	1073.34	0.0689074	96	227.553	989	1345.53	1.58845e-12	2	0.693532	987	1344.83	0.739052	192	228.264	793	1094.23	0.060014	NA	NA	1086	1586.14	NA	0.125416	0.00038224	0.125808
Bcin02g02510.1	1	124.932	1085	2080.25	5.87622e-28	2	30.6021	985	1457.19	7.30783e-07	12	16.3044	781	1156.84	0.208526	96	306.43	989	1773.82	1.64597e-23	2	286.021	987	1487.8	7.228e-60	192	284.053	793	1173.14	8.24279e-05	NA	NA	1086	2205.18	NA	0.109532	0.102237	0.101534	hypothetical protein BofuT4_P110040.1	C:mitochondrial proton-transporting ATP synthase complex, catalytic core F(1); F:proton-transporting ATPase activity, rotational mechanism; P:ATP synthesis coupled proton transport; F:proton-transporting ATP synthase activity, rotational mechanism
Bcin02g02520.1	1	84.9827	1085	1843.07	2.06687e-19	2	2.09876	985	1392.8	0.395432	12	11.4317	781	1173.79	0.521245	96	445.187	989	1397.88	9.70203e-46	2	2.97821	987	1394.9	0.270678	192	207.581	793	1185.22	0.276894	NA	NA	1086	1928.05	NA	0.187352	0.00125334	0.0873581
Bcin02g02530.1	1	18.0353	1085	1819.62	4.96958e-05	2	0.44919	985	1538.12	0.819948	12	17.802	781	1224.46	0.149224	96	272.696	989	1546.92	1.31901e-18	2	8.35647	987	1538.57	0.024506	192	295.853	793	1242.26	1.44278e-05	NA	NA	1086	1837.65	NA	0.128709	0.00394414	0.139639
Bcin02g02540.1	1	1.70143	1085	1964.39	0.239972	2	30.1042	985	1516.51	9.26404e-07	12	38.9956	781	1173.31	0.000230321	96	414.528	989	1549.86	1.31074e-40	2	3.24782	987	1546.62	0.240236	192	304.204	793	1212.31	3.9172e-06	NA	NA	1086	1966.09	NA	0.173889	0.00136242	0.12761
Bcin02g02550.1	1	27.733	1085	1453.98	3.94552e-07	2	16.4286	985	1241.79	0.000568842	12	18.3542	781	1031.39	0.130848	96	187.574	989	1266.4	8.83093e-08	2	8.18864	987	1258.22	0.0264191	192	192.04	793	1049.75	0.58749	NA	NA	1086	1481.71	NA	0.11182	0.00488153	0.114482
Bcin02g02560.1	1	3.92421	1085	1395.74	0.0676584	2	3.18244	985	1182.88	0.242521	12	20.7756	781	995.654	0.0710132	96	208.071	989	1187.67	4.0021e-10	2	1.61461	987	1186.06	0.492322	192	166.445	793	1016.43	0.989781	NA	NA	1086	1399.67	NA	0.129289	0.00100327	0.103424
Bcin02g02570.1	1	8.7746	1085	2211.32	0.00529765	2	83.6552	985	1566.83	6.88605e-18	12	133.554	781	1214.07	2.63469e-21	96	435.853	989	1775.47	3.65984e-44	2	124.977	987	1650.49	3.30892e-26	192	219.206	793	1347.63	0.126148	NA	NA	1086	2220.09	NA	0.15673	0.0449409	0.0788248
Bcin02g02580.1	1	118.237	1085	2096.9	1.58882e-26	2	31.2635	985	1413.2	5.34482e-07	12	25.9797	781	1148.71	0.0164883	96	641.245	989	1455.66	1.82373e-80	2	11.1965	987	1444.46	0.00683589	192	238.508	793	1174.69	0.0226972	NA	NA	1086	2215.14	NA	0.223619	0.0039045	0.0831738
Bcin02g02590.1	1	14.8396	1085	1068.18	0.000248617	2	3.14436	985	927.776	0.246556	12	26.5538	781	753.006	0.01388	96	120.725	989	947.456	0.0470179	2	16.5349	987	930.921	0.000599782	192	148.217	793	779.56	1	NA	NA	1086	1083.02	NA	0.0989324	0.0135501	0.121461
Bcin02g02600.1	1	63.8108	1085	1994.26	6.94829e-15	2	37.8987	985	1530.23	2.25268e-08	12	19.5881	781	1240.59	0.0964116	96	389.374	989	1604.88	1.75189e-36	2	36.7496	987	1568.13	5.06781e-08	192	270.055	793	1260.18	0.000570666	NA	NA	1086	2058.07	NA	0.156741	0.0147934	0.10871
Bcin02g02610.1	1	77.255	1085	1971.81	9.25014e-18	2	5.91968	985	1564.44	0.0708426	12	8.39681	781	1232.66	0.768891	96	363.895	989	1607.91	2.2136e-32	2	37.5556	987	1570.36	3.4589e-08	192	323.375	793	1241.06	1.62355e-07	NA	NA	1086	2049.06	NA	0.148497	0.0153256	0.131962
Bcin02g02630.1	1	1.03589	1085	1836.57	0.367245	2	3.94008	985	1507.16	0.17276	12	20.1519	781	1238.3	0.0835295	96	271.867	989	1564.7	1.72758e-18	2	53.6029	987	1511.1	1.78695e-11	192	248.706	793	1258.45	0.00775301	NA	NA	1086	1837.61	NA	0.125685	0.0247808	0.114978
Bcin02g02640.1	1	6.58557	1085	1701.87	0.0164282	2	8.5609	985	1450.3	0.0215227	12	41.8926	781	1149.59	8.18114e-05	96	224.009	989	1477.87	4.4623e-12	2	19.0089	987	1458.86	0.00019412	192	258.812	793	1191.48	0.00236949	NA	NA	1086	1708.46	NA	0.114789	0.00974076	0.132624
Bcin02g02650.1	1	10.7866	1085	1795.77	0.00192027	2	32.1907	985	1489.78	3.43996e-07	12	35.6686	781	1170.38	0.000728806	96	261.416	989	1534.35	4.98515e-17	2	12.3801	987	1521.97	0.00396202	192	283.734	793	1206.05	8.65103e-05	NA	NA	1086	1806.56	NA	0.12566	0.00595097	0.136387
Bcin02g02660.1	1	49.2309	1085	2021.21	9.34287e-12	2	2.19503	985	1658.7	0.378828	12	150.194	781	1237.5	1.65777e-24	96	343.394	989	1677.82	3.73281e-29	2	16.9257	987	1660.89	0.000503216	192	271	793	1387.7	0.000504544	NA	NA	1086	2070.45	NA	0.14127	0.0069631	0.111488
Bcin02g02670.1	1	83.5236	1085	2537.82	4.24803e-19	2	154.703	985	1626.86	9.19545e-33	12	124.64	781	1188.82	1.31395e-19	96	718.518	989	1819.3	8.081e-95	2	37.7382	987	1781.56	3.18249e-08	192	313.399	793	1313.46	8.81815e-07	NA	NA	1086	2621.34	NA	0.212731	0.0111731	0.0927874
Bcin02g02680.1	1	6.92908	1085	1879	0.013749	2	13.7558	985	1524.09	0.00196413	12	11.787	781	1243.02	0.493728	96	331.91	989	1547.09	2.25483e-27	2	9.23906	987	1537.85	0.0164865	192	269.283	793	1254.81	0.000633387	NA	NA	1086	1885.93	NA	0.149034	0.00414851	0.120913
Bcin02g02690.1	1	0.946062	1085	1515.1	0.390194	2	5.26321	985	1324.73	0.0947932	12	16.9199	781	1070.66	0.182465	96	178.303	989	1336.8	8.57713e-07	2	6.80545	987	1329.99	0.0490622	192	237.15	793	1087.58	0.0260384	NA	NA	1086	1516.04	NA	0.104813	0.00400049	0.139405
Bcin02g02700.1	1	72.9969	1085	1942.43	7.53481e-17	2	26.112	985	1381.85	6.07523e-06	12	32.9584	781	1133.67	0.00181363	96	399.036	989	1543.39	4.66303e-38	2	135.431	987	1407.96	2.33865e-28	192	215.22	793	1166.63	0.168694	NA	NA	1086	2015.42	NA	0.156491	0.0531124	0.0844037
Bcin02g02710.1	1	5.35414	1085	1917.77	0.0314278	2	9.79547	985	1561.95	0.0121948	12	38.3207	781	1253.34	0.000291433	96	328.909	989	1588.86	6.51622e-27	2	17.1127	987	1571.75	0.00046184	192	270.291	793	1291.66	0.000553549	NA	NA	1086	1923.13	NA	0.144948	0.00754148	0.119116
Bcin02g02720.1	1	1.25196	1085	774.255	0.317763	2	16.3285	985	470.139	0.000595727	12	27.9549	781	324.915	0.00902807	96	285.149	989	489.106	2.20017e-20	2	2.63855	987	486.467	0.31496	192	117.268	793	352.87	1	NA	NA	1086	775.507	NA	0.268175	0.00248148	0.110288
Bcin02g02730.1	1	25.9075	1085	983.176	9.77162e-07	2	9.72594	985	846.325	0.0125996	12	29.4614	781	649.531	0.00561103	96	126.962	989	856.214	0.020106	2	0.162577	987	856.051	0.932271	192	167.333	793	678.992	0.983839	NA	NA	1086	1009.08	NA	0.111742	0.000143087	0.147273
Bcin02g02740.1	1	0.0735805	1085	2190.68	0.818826	2	51.8671	985	1547.04	2.87531e-11	12	160.191	781	1166.49	1.92201e-26	96	511.436	989	1679.25	3.88368e-57	2	80.3346	987	1598.91	5.96884e-17	192	220.365	793	1326.68	0.115328	NA	NA	1086	2190.76	NA	0.183803	0.0288711	0.0791961
Bcin02g02750.1	1	18.7418	1085	1841.94	3.4963e-05	2	31.7756	985	1415.59	4.18183e-07	12	18.5722	781	1159.9	0.124038	96	384.348	989	1457.59	1.14976e-35	2	10.2258	987	1447.37	0.0105928	192	237.114	793	1178.48	0.0261088	NA	NA	1086	1860.68	NA	0.170423	0.00453421	0.105139
Bcin02g02760.1	1	2.61905	1085	1785.41	0.13982	2	23.8217	985	1553.77	1.77926e-05	12	71.4809	781	1239.17	8.0822e-10	96	206.955	989	1578.46	5.43291e-10	2	0.862194	987	1577.59	0.685768	192	243.125	793	1310.65	0.0140817	NA	NA	1086	1788.03	NA	0.103693	0.000431994	0.121816
Bcin02g02770.1	1	9.57048	1085	2010.96	0.00355349	2	24.6419	985	1406.75	1.21025e-05	12	38.2562	781	1082.66	0.000297777	96	559.006	989	1451.95	1.49801e-65	2	20.5589	987	1431.39	9.50598e-05	192	285.84	793	1120.91	6.3959e-05	NA	NA	1086	2020.53	NA	0.214994	0.00790697	0.109934
Bcin02g02780.1	1	18.5059	1085	2010.68	3.93228e-05	2	30.0808	985	1475.49	9.36648e-07	12	44.925	781	1155.2	2.71168e-05	96	442.326	989	1568.35	2.94924e-45	2	62.7843	987	1505.57	2.39645e-13	192	275.362	793	1200.12	0.000281956	NA	NA	1086	2029.18	NA	0.174536	0.0247739	0.108654
Bcin02g02790.1	1	62.2528	1085	1942.64	1.50534e-14	2	26.9326	985	1523.44	4.12292e-06	12	48.0358	781	1193.71	8.5108e-06	96	343.576	989	1599.07	3.49835e-29	2	48.6904	987	1550.38	1.81143e-10	192	281.702	793	1241.74	0.000115448	NA	NA	1086	2004.9	NA	0.143326	0.0203117	0.117515
Bcin02g02800.1	1	8.01152	1085	1543.06	0.00782885	2	5.41455	985	1343.94	0.0886651	12	27.9778	781	1101.71	0.00896894	96	176.758	989	1366.31	1.23747e-06	2	16.9522	987	1349.35	0.000497595	192	214.255	793	1129.68	0.180725	NA	NA	1086	1551.08	NA	0.101307	0.00971594	0.122797
Bcin02g02810.1	1	8.94093	1085	1417.78	0.00487175	2	13.9816	985	1251.1	0.00177006	12	6.59281	781	1034.88	0.889826	96	146.446	989	1271.33	0.000788412	2	6.24736	987	1265.09	0.0631199	192	209.633	793	1041.47	0.244932	NA	NA	1086	1426.72	NA	0.092722	0.00395549	0.132728
Bcin02g02820.1	1	2.4178	1085	2171.39	0.15671	2	48.7503	985	1652.47	1.26885e-10	12	128.336	781	1241.84	2.56398e-20	96	454.404	989	1716.99	2.68021e-47	2	15.7618	987	1701.22	0.000856956	192	282.295	793	1370.18	0.000106468	NA	NA	1086	2173.81	NA	0.171864	0.0059614	0.106769
Bcin02g02830.1	1	7.35705	1085	915.965	0.0109746	2	2.31978	985	784.051	0.358155	12	34.0253	781	567.772	0.00127493	96	126.003	989	789.962	0.0230719	2	3.59061	987	786.371	0.205993	192	182.254	793	601.797	0.788301	NA	NA	1086	923.322	NA	0.119671	0.00341016	0.173094
Bcin02g02840.1	1	0.571262	1085	1932.43	0.509587	2	32.0683	985	1579.73	3.64389e-07	12	48.9672	781	1270.1	5.96287e-06	96	286.93	989	1645.5	1.21448e-20	2	33.7025	987	1611.8	2.07927e-07	192	260.663	793	1319.07	0.00189238	NA	NA	1086	1933	NA	0.127319	0.0149547	0.115663
Bcin02g02850.1	1	96.2829	1085	2191.98	7.82195e-22	2	49.4569	985	1626.06	9.08018e-11	12	65.356	781	1224.97	9.64955e-09	96	340.887	989	1851.09	9.18629e-29	2	175.572	987	1675.52	8.70386e-37	192	335.731	793	1290.33	1.6399e-08	NA	NA	1086	2288.26	NA	0.121541	0.0625987	0.119702	phosphotransferase enzyme family	F:transferase activity
Bcin02g02870.1	1	11.8484	1085	1717.55	0.00112135	2	25.1564	985	1451.37	9.50265e-06	12	36.4107	781	1179.79	0.000565708	96	229.311	989	1488.24	9.47391e-13	2	11.7183	987	1476.53	0.00538261	192	235.165	793	1216.2	0.0315394	NA	NA	1086	1729.4	NA	0.116376	0.00594708	0.119347
Bcin02g02880.1	1	6.92808	1085	1272.61	0.0137507	2	4.08824	985	1120.65	0.161524	12	25.0141	781	902.302	0.0219509	96	135.451	989	1137.16	0.0054322	2	12.4241	987	1124.74	0.00388301	192	193.335	793	927.316	0.559847	NA	NA	1086	1279.54	NA	0.0948923	0.00870393	0.135444
Bcin02g02890.1	1	0.553707	1085	1823.33	0.516125	2	16.9587	985	1558.9	0.000443721	12	17.5718	781	1243.8	0.157464	96	242.734	989	1580.6	1.69339e-14	2	4.74017	987	1575.86	0.123425	192	297.528	793	1261.37	1.11532e-05	NA	NA	1086	1823.89	NA	0.117186	0.00228843	0.143639
Bcin02g02900.1	1	38.6431	1085	1497.43	1.77589e-09	2	8.66955	985	1344.06	0.020472	12	26.3198	781	1114.47	0.0148844	96	132.693	989	1364.74	0.00846657	2	12.0087	987	1352.73	0.00471849	192	203.273	793	1140.79	0.353408	NA	NA	1086	1536.08	NA	0.0789475	0.00714472	0.12094
Bcin02g02910.1	1	71.1297	1085	2277.39	1.89245e-16	2	152.917	985	1581.26	2.18266e-32	12	124.614	781	1164.65	1.32755e-19	96	424.971	989	1852.42	2.40218e-42	2	118.245	987	1734.17	8.22358e-25	192	291.997	793	1289.26	2.58595e-05	NA	NA	1086	2348.52	NA	0.146961	0.0408905	0.100976
Bcin02g02920.1	1	233.931	1085	2085.08	2.81621e-51	2	148.21	985	1519.52	2.14326e-31	12	60.1014	781	1197.53	7.90093e-08	96	398.545	989	1686.53	5.60829e-38	2	18.8042	987	1667.73	0.000212831	192	261.884	793	1257.64	0.00163321	NA	NA	1086	2319.01	NA	0.145648	0.00687197	0.0957053
Bcin02g02930.1	1	31.6712	1085	2282.41	5.6399e-08	2	114.259	985	1655.98	2.78067e-24	12	167.388	781	1167.67	7.9337e-28	96	498.712	989	1783.7	6.44276e-55	2	13.4612	987	1770.24	0.0024243	192	320.917	793	1335.06	2.41765e-07	NA	NA	1086	2314.08	NA	0.176457	0.00476291	0.113548
Bcin02g02940.1	1	54.0041	1085	2455.68	8.84107e-13	2	70.5703	985	1510.89	3.68318e-15	12	51.5614	781	1165.82	2.22737e-06	96	759.119	989	1696.56	1.82882e-102	2	115.095	987	1581.47	3.71899e-24	192	293.518	793	1217.38	2.05758e-05	NA	NA	1086	2509.68	NA	0.224333	0.0340124	0.0867396
Bcin02g02950.1	1	0.944721	1085	1110.52	0.390549	2	1.92831	985	980.494	0.427231	12	23.8004	781	770.36	0.0310808	96	124.334	989	986.187	0.0291328	2	3.76491	987	982.422	0.190275	192	186.333	793	794.16	0.707832	NA	NA	1086	1111.47	NA	0.100304	0.00303729	0.150322
Bcin02g02960.1	1	38.0006	1085	1516.38	2.4454e-09	2	2.43663	985	1366.75	0.339584	12	10.5948	781	1118.75	0.590446	96	130.271	989	1386.11	0.012315	2	16.9233	987	1369.19	0.000503558	192	237.412	793	1129.34	0.0253403	NA	NA	1086	1554.39	NA	0.076559	0.00994563	0.139524
Bcin02g02960.2	1	47.2565	1085	1443.26	2.49438e-11	2	3.50178	985	1283.56	0.209825	12	19.1383	781	1092.44	0.10794	96	144.985	989	1298.27	0.00103348	2	11.2061	987	1287.07	0.0068043	192	171.986	793	1111.58	0.942279	NA	NA	1086	1490.51	NA	0.0880458	0.00680519	0.104442
Bcin02g02960.3	1	53.8748	1085	1418.19	9.42863e-13	2	2.17545	985	1266.45	0.382201	12	38.4439	781	1066.49	0.000278894	96	143.418	989	1274.77	0.00137349	2	6.14359	987	1268.63	0.0660932	192	161.516	793	1104.94	1	NA	NA	1086	1472.07	NA	0.0884407	0.00378853	0.0996014
Bcin02g02960.4	1	27.8714	1085	1519.64	3.68558e-07	2	9.23892	985	1334.91	0.015777	12	15.2494	781	1093.7	0.261647	96	159.182	989	1360.46	6.30189e-05	2	16.3086	987	1344.15	0.00066488	192	225.958	793	1108.95	0.0731896	NA	NA	1086	1547.51	NA	0.0923867	0.00946525	0.131142
Bcin02g02970.1	1	0.663989	1085	1485.71	0.475663	2	23.9663	985	1334.17	1.65984e-05	12	35.0841	781	1090.3	0.000890318	96	124.317	989	1361.39	0.029199	2	3.24931	987	1358.14	0.240089	192	208.785	793	1125.39	0.258036	NA	NA	1086	1486.37	NA	0.077027	0.00201328	0.129364
Bcin02g02980.1	1	18.4461	1085	1900.94	4.05043e-05	2	11.6786	985	1399.83	0.00514552	12	19.8224	781	1158.84	0.0908947	96	317.766	989	1583.17	3.25892e-25	2	171.664	987	1411.51	5.84792e-36	192	221.17	793	1178.66	0.108373	NA	NA	1086	1919.39	NA	0.131918	0.071265	0.0918168	antibiotic biosynthesis monooxygenase [Botrytis cinerea 1]	P:oxidation-reduction process; F:monooxygenase activity
Bcin02g02990.1	1	2.35658	1085	1781.86	0.162303	2	15.0218	985	1532.95	0.00109087	12	28.9428	781	1232.44	0.00662424	96	232.607	989	1549.26	3.57561e-13	2	1.2884	987	1547.97	0.56797	192	271.567	793	1261.38	0.000470349	NA	NA	1086	1784.22	NA	0.11526	0.000638419	0.134565
Bcin02g03000.1	1	1.28628	1085	1292.64	0.311004	2	8.41274	985	1111.57	0.0230366	12	30.5861	781	898.067	0.00393129	96	171.34	989	1121.3	4.36503e-06	2	1.31078	987	1119.99	0.562631	192	182.921	793	928.653	0.776271	NA	NA	1086	1293.92	NA	0.11683	0.00089377	0.124726
Bcin02g03010.1	1	47.438	1085	1454.29	2.28263e-11	2	31.728	985	1228.91	4.28095e-07	12	77.765	781	997.28	6.12275e-11	96	188.12	989	1266.17	7.69706e-08	2	5.5323	987	1260.64	0.0865823	192	153.867	793	1075.04	1	NA	NA	1086	1501.73	NA	0.11096	0.00326316	0.0907565
Bcin02g03020.1	1	64.0301	1085	1349.72	6.2368e-15	2	6.11969	985	1160.42	0.0648359	12	30.8584	781	950.056	0.00360015	96	165.995	989	1183.72	1.45301e-05	2	17.1819	987	1166.54	0.000448223	192	179.507	793	980.915	0.836073	NA	NA	1086	1413.75	NA	0.103946	0.0107594	0.112408
Bcin02g03030.1	1	29.2609	1085	1445.36	1.85154e-07	2	1.94571	985	1200.98	0.423735	12	43.2027	781	911.58	5.09043e-05	96	230.958	989	1214.41	5.83134e-13	2	11.4808	987	1202.92	0.00600886	192	246.196	793	954.783	0.0102236	NA	NA	1086	1474.62	NA	0.134508	0.0066863	0.143382
Bcin02g03050.1	1	20.7222	1085	1148.03	1.29521e-05	2	5.03998	985	924.145	0.104974	12	36.2812	781	663.215	0.000591098	96	204.831	989	943.196	9.70683e-10	2	14.0106	987	929.185	0.0018894	192	224.649	793	699.497	0.0817333	NA	NA	1086	1168.75	NA	0.147616	0.0100971	0.161898
Bcin02g03060.1	1	835.787	1085	2719.02	1.66055e-180	2	222.879	985	1572.56	4.89015e-47	12	197.391	781	1164.03	1.18824e-33	96	876.205	989	1842.81	8.42893e-125	2	47.3699	987	1795.44	3.40147e-10	192	211.146	793	1361.42	0.222994	NA	NA	1086	3554.8	NA	0.195652	0.0105775	0.0471479
Bcin02g03070.1	1	80.8742	1085	1547.8	1.5596e-18	2	48.939	985	1285.93	1.16208e-10	12	66.8656	781	995.02	5.25464e-09	96	200.021	989	1347.78	3.52362e-09	2	12.9148	987	1334.87	0.00310299	192	224.042	793	1061.89	0.085929	NA	NA	1086	1628.68	NA	0.108612	0.00701276	0.121655
Bcin02g03080.1	1	113.62	1085	2368.92	1.55075e-25	2	50.6172	985	1538.03	5.22351e-11	12	56.8919	781	1204.57	2.82085e-07	96	709.346	989	1659.57	4.18596e-93	2	70.9255	987	1588.64	5.00714e-15	192	276.565	793	1261.46	0.000240101	NA	NA	1086	2482.54	NA	0.217404	0.0217376	0.0847627
Bcin02g03090.1	1	23.575	1085	2618.89	3.1234e-06	2	293.458	985	1667.91	1.1087e-61	12	186.138	781	1176.24	1.88896e-31	96	602.983	989	2015.91	1.78502e-73	2	54.5428	987	1961.37	1.15971e-11	192	305.533	793	1362.38	3.1877e-06	NA	NA	1086	2642.47	NA	0.182722	0.0165282	0.092586
Bcin02g03100.1	1	4.90798	1085	1538.09	0.0398761	2	20.062	985	1400.35	0.000104399	12	20.2055	781	1178.94	0.0823851	96	111.665	989	1426.43	0.134916	2	6.01678	987	1420.41	0.0698915	192	201.2	793	1199.15	0.393236	NA	NA	1086	1543	NA	0.0672403	0.00362308	0.121155
Bcin02g03110.1	1	220.896	1085	2033.98	1.74929e-48	2	78.9895	985	1587.54	6.47891e-17	12	85.2387	781	1252.31	2.78724e-12	96	349.41	989	1684.57	4.27508e-30	2	18.035	987	1666.53	0.000303219	192	249.993	793	1337.55	0.00668832	NA	NA	1086	2254.87	NA	0.133245	0.00687751	0.0953329
Bcin02g03150.1	1	9.05427	1085	1475.05	0.00459436	2	0.20014	985	1320.09	0.915623	12	10.6239	781	1102.29	0.58826	96	153.804	989	1321.25	0.00019025	2	0.952633	987	1320.29	0.658923	192	207.183	793	1112.91	0.283615	NA	NA	1086	1484.11	NA	0.093848	0.000581277	0.126419
Bcin02g03160.1	1	18.3798	1085	1849.26	4.18035e-05	2	24.9889	985	1492.82	1.02871e-05	12	26.3949	781	1177.8	0.0145486	96	326.592	989	1522.67	1.47596e-26	2	4.8616	987	1517.81	0.116919	192	288.629	793	1204.19	4.23477e-05	NA	NA	1086	1867.64	NA	0.148512	0.00221073	0.131249
Bcin02g03170.1	1	140.88	1085	2030.85	2.31664e-31	2	30.7604	985	1547.56	6.78227e-07	12	92.6015	781	1221.95	1.24971e-13	96	427.401	989	1603.45	9.48743e-43	2	25.125	987	1578.32	1.14608e-05	192	233.014	793	1314.55	0.0390307	NA	NA	1086	2171.73	NA	0.162866	0.00957413	0.0887924
Bcin02g03180.1	1	18.6296	1085	1778.57	3.6972e-05	2	1.21184	985	1465.12	0.584748	12	26.9284	781	1168.85	0.0123796	96	309.646	989	1468.93	5.43909e-24	2	2.59155	987	1466.33	0.32143	192	269.349	793	1195.77	0.000628262	NA	NA	1086	1797.2	NA	0.146791	0.00122855	0.127687
Bcin02g03190.1	1	0.244165	1085	1450.67	0.672264	2	5.92581	985	1292.45	0.0706466	12	16.658	781	1075.39	0.193176	96	145.229	989	1305.44	0.000988232	2	7.06317	987	1298.37	0.0436785	192	200.395	793	1092.05	0.409631	NA	NA	1086	1450.91	NA	0.0905869	0.00440566	0.124996
Bcin02g03200.1	1	1.45798	1085	1836.09	0.278779	2	26.935	985	1555.41	4.11909e-06	12	54.6759	781	1261.29	6.70397e-07	96	245.53	989	1590.56	7.19457e-15	2	8.21018	987	1582.35	0.026172	192	239.444	793	1315.97	0.020694	NA	NA	1086	1837.55	NA	0.117406	0.0039259	0.114496
Bcin02g03210.1	1	15.5463	1085	1313.64	0.000173823	2	39.9266	985	1072.56	8.5935e-09	12	38.9594	781	825.389	0.000233123	96	200.116	989	1113.53	3.43688e-09	2	1.04264	987	1112.48	0.632937	192	208.208	793	864.349	0.266913	NA	NA	1086	1329.19	NA	0.130765	0.00068131	0.136053
Bcin02g03240.1	1	0.848378	1085	1958.31	0.417706	2	1.66437	985	1555.6	0.479517	12	34.4407	781	1192.45	0.00110964	96	392.171	989	1566.14	6.16104e-37	2	8.88117	987	1557.26	0.0194128	192	328.707	793	1226.89	6.21101e-08	NA	NA	1086	1959.16	NA	0.166159	0.00376287	0.13927
Bcin02g03250.1	1	8.05944	1085	1486.31	0.00763972	2	13.0736	985	1326.15	0.0027021	12	21.6013	781	1077.94	0.0570559	96	122.824	989	1363.49	0.0357417	2	24.2638	987	1339.22	1.6987e-05	192	226.607	793	1099.54	0.0692953	NA	NA	1086	1494.37	NA	0.0748263	0.0147819	0.138052
Bcin02g03260.1	1	109.506	1085	2016.91	1.15897e-24	2	86.7921	985	1632.72	1.49493e-18	12	71.0064	781	1270.88	9.79495e-10	96	290.863	989	1726.04	3.24817e-21	2	6.52949	987	1719.52	0.0555972	192	290.835	793	1341.89	3.08393e-05	NA	NA	1086	2126.41	NA	0.120002	0.0026939	0.119991
Bcin02g03270.1	1	198.283	1085	2154.35	1.22862e-43	2	97.7543	985	1517.46	7.58093e-21	12	81.3521	781	1171.1	1.39946e-11	96	464.341	989	1690.01	5.46538e-49	2	74.7989	987	1615.21	8.12426e-16	192	265.005	793	1252.45	0.00111021	NA	NA	1086	2352.64	NA	0.160573	0.0258661	0.0916411
Bcin02g03280.1	1	19.162	1085	1921.4	2.82885e-05	2	43.3042	985	1510.49	1.72579e-09	12	31.3624	781	1218.54	0.0030579	96	285.972	989	1635.43	1.67013e-20	2	81.6386	987	1553.79	3.23713e-17	192	260.582	793	1249.9	0.00190874	NA	NA	1086	1940.56	NA	0.123896	0.0353694	0.112895
Bcin02g03290.1	1	200.985	1085	2127.67	3.23875e-44	2	30.8028	985	1634.19	6.64922e-07	12	77.7658	781	1235.93	6.12275e-11	96	441.29	989	1686.38	4.41492e-45	2	21.3811	987	1665	6.47761e-05	192	320.493	793	1313.7	2.60662e-07	NA	NA	1086	2328.65	NA	0.158094	0.00765983	0.114818
Bcin02g03300.1	1	5.26216	1085	1859.31	0.0329698	2	7.51972	985	1437.65	0.0343934	12	11.8246	781	1212.45	0.490797	96	400.886	989	1458.43	2.32051e-38	2	13.2569	987	1445.17	0.00265938	192	213.374	793	1224.28	0.19212	NA	NA	1086	1864.58	NA	0.175926	0.00581768	0.0936375
Bcin02g03310.1	1	29.0048	1085	2351.25	2.10055e-07	2	21.8643	985	1452.34	4.45377e-05	12	57.1134	781	1174.54	2.58883e-07	96	857.807	989	1493.44	2.93037e-121	2	19.235	987	1474.21	0.000175138	192	220.695	793	1231.65	0.112357	NA	NA	1086	2380.26	NA	0.263349	0.0059052	0.0677541
Bcin02g03320.1	1	0.845164	1085	1827.46	0.418563	2	1.48311	985	1476.22	0.519089	12	41.8869	781	1203.63	8.19734e-05	96	345.831	989	1481.63	1.55699e-29	2	3.93228	987	1477.7	0.176761	192	230.695	793	1245.52	0.0482979	NA	NA	1086	1828.31	NA	0.158779	0.00180539	0.105917
Bcin02g03330.1	1	25.2917	1085	1528.34	1.32732e-06	2	14.9959	985	1034.39	0.00110395	12	18.4112	781	850.708	0.129029	96	473.785	989	1054.55	1.31629e-50	2	5.16778	987	1049.38	0.102166	192	165.268	793	869.119	0.998186	NA	NA	1086	1553.63	NA	0.233095	0.00254248	0.0813094
Bcin02g03340.1	1	52.471	1085	1708.23	1.88205e-12	2	8.08767	985	1449.79	0.0267197	12	53.6536	781	1179.41	9.93254e-07	96	239.544	989	1468.69	4.46132e-14	2	10.8101	987	1457.88	0.00815034	192	216.723	793	1233.06	0.151513	NA	NA	1086	1760.7	NA	0.119113	0.00537532	0.107766
Bcin02g03350.1	1	1.04028	1085	1818.31	0.366216	2	24.6415	985	1436.34	1.21025e-05	12	19.5349	781	1159.12	0.097713	96	277.454	989	1540.85	2.7871e-19	2	79.8698	987	1460.98	7.4636e-17	192	257.685	793	1178.66	0.00271292	NA	NA	1086	1819.35	NA	0.127467	0.0366936	0.118385
Bcin02g03350.2	1	2.43591	1085	1607.66	0.154997	2	10.7003	985	1355.3	0.00805929	12	14.8621	781	1130	0.283374	96	197.733	989	1409.93	6.44856e-09	2	43.9262	987	1366	1.72031e-09	192	210.437	793	1144.86	0.233083	NA	NA	1086	1610.09	NA	0.106782	0.0237214	0.113642
Bcin02g03360.1	1	29.4199	1085	1718.5	1.71163e-07	2	11.5407	985	1481.97	0.00547529	12	18.9479	781	1207.09	0.113222	96	217.57	989	1500.93	2.81691e-11	2	7.41768	987	1493.51	0.0372472	192	255.936	793	1226.04	0.0033469	NA	NA	1086	1747.92	NA	0.110279	0.00375978	0.129725
Bcin02g03370.1	1	34.945	1085	1611.56	1.12095e-08	2	0.213219	985	1428.32	0.91025	12	11.9733	781	1178.51	0.47924	96	179.955	989	1431.61	5.7694e-07	2	3.07877	987	1428.53	0.259112	192	237.831	793	1190.49	0.0243116	NA	NA	1086	1646.51	NA	0.0983605	0.00168281	0.129995
Bcin02g03380.1	1	42.7594	1085	1834.43	2.32117e-10	2	29.796	985	1552.94	1.07042e-06	12	60.7098	781	1239.7	6.19637e-08	96	247.478	989	1586.95	3.94344e-15	2	4.2177	987	1582.74	0.155623	192	252.529	793	1300.41	0.00500662	NA	NA	1086	1877.19	NA	0.116247	0.00198118	0.11862
Bcin02g03390.1	1	4.22816	1085	1916.31	0.0573615	2	18.771	985	1566.89	0.000190987	12	15.339	781	1231.26	0.257031	96	299.03	989	1617.28	2.05702e-22	2	31.6218	987	1585.66	5.53636e-07	192	320.292	793	1246.6	2.68814e-07	NA	NA	1086	1920.54	NA	0.132832	0.0140467	0.142277
Bcin02g03400.1	1	13.7361	1085	1985.18	0.000433635	2	50.4481	985	1569.21	5.67182e-11	12	34.05	781	1237.31	0.00126433	96	360.984	989	1624.2	6.40659e-32	2	4.53877	987	1619.66	0.134776	192	297.857	793	1271.36	1.05946e-05	NA	NA	1086	1998.92	NA	0.152672	0.00191959	0.125973
Bcin02g03410.1	1	5.847	1085	1606.01	0.0242247	2	15.1841	985	1409.09	0.00100995	12	23.4166	781	1148.9	0.0345973	96	180.227	989	1425.78	5.4048e-07	2	1.51324	987	1424.27	0.514832	192	236.768	793	1172.32	0.0269973	NA	NA	1086	1611.86	NA	0.100483	0.00084369	0.132007
Bcin02g03420.1	1	49.7721	1085	1611.34	7.1569e-12	2	6.00492	985	1433.39	0.0682386	12	9.62167	781	1125.59	0.671236	96	153.597	989	1457.74	0.0001982	2	18.34	987	1439.4	0.000263605	192	298.182	793	1135.21	1.00686e-05	NA	NA	1086	1661.11	NA	0.0837934	0.0100052	0.162671
Bcin02g03430.1	1	0.542674	1085	1869.44	0.520471	2	0.610187	985	1552.66	0.763196	12	96.0069	781	1218.72	2.97559e-14	96	311.222	989	1558.21	3.15563e-24	2	4.93887	987	1553.27	0.112941	192	237.94	793	1314.72	0.0240624	NA	NA	1086	1869.98	NA	0.142362	0.00225917	0.10884
Bcin02g03440.1	1	1.89382	1085	1252.64	0.213617	2	3.93661	985	1077.44	0.17301	12	17.8132	781	865.123	0.148848	96	136.878	989	1115.76	0.00428478	2	34.3839	987	1081.38	1.51417e-07	192	194.504	793	882.936	0.534457	NA	NA	1086	1254.53	NA	0.0960012	0.0241156	0.136418
Bcin02g03450.1	1	95.3923	1085	1857.75	1.21423e-21	2	19.8004	985	1487.01	0.000117998	12	28.2938	781	1227.83	0.00813114	96	321.548	989	1536.2	8.69273e-26	2	29.3939	987	1506.81	1.56568e-06	192	230.887	793	1256.12	0.0474261	NA	NA	1086	1953.14	NA	0.139556	0.0127573	0.100208
Bcin02g03460.1	1	2.79242	1085	1332.38	0.127011	2	0.164143	985	1184.42	0.930426	12	12.9703	781	954.234	0.405061	96	147.519	989	1184.86	0.000644719	2	0.274234	987	1184.59	0.887159	192	217.217	793	967.204	0.146153	NA	NA	1086	1335.17	NA	0.0994756	0.000184923	0.146475
Bcin02g03470.1	1	3.61846	1085	1719	0.0801488	2	11.5625	985	1516.75	0.00542109	12	38.266	781	1216.14	0.00029682	96	181.972	989	1537.03	3.53235e-07	2	8.7156	987	1528.31	0.0208919	192	262.344	793	1254.4	0.00154623	NA	NA	1086	1722.62	NA	0.0951087	0.00455526	0.137116
Bcin02g03480.1	1	6.69827	1085	2657.28	0.0154743	2	24.6911	985	868.204	1.18333e-05	12	36.4757	781	678.683	0.00055271	96	1764.06	989	893.226	2.44275e-302	2	0.330495	987	892.895	0.865701	192	153.046	793	715.158	1	NA	NA	1086	2663.98	NA	0.398354	7.46314e-05	0.0345603	alpha beta hydrolase fold	P:metabolic process; F:hydrolase activity
Bcin02g03490.1	1	12.5208	1085	1843.16	0.000798375	2	30.0715	985	1473.8	9.40702e-07	12	7.82994	781	1185.01	0.810319	96	313.689	989	1529.47	1.34555e-24	2	25.603	987	1503.87	9.1369e-06	192	280.956	793	1192.84	0.000128564	NA	NA	1086	1855.68	NA	0.142912	0.0116644	0.128
Bcin02g03500.1	1	2.34095	1085	1654.16	0.163783	2	39.0526	985	1401.04	1.30202e-08	12	20.9053	781	1145.79	0.0686714	96	199.359	989	1454.8	4.19834e-09	2	14.7084	987	1440.09	0.00137934	192	234.337	793	1166.7	0.0342606	NA	NA	1086	1656.5	NA	0.106577	0.00786308	0.125276
Bcin02g03510.1	1	17.3503	1085	2478.02	6.99973e-05	2	102.785	985	1615.77	6.82399e-22	12	64.267	781	1205.51	1.49778e-08	96	508.368	989	1969.65	1.33345e-56	2	251.098	987	1718.56	1.07313e-52	192	346	793	1269.77	2.33414e-09	NA	NA	1086	2495.37	NA	0.156188	0.077146	0.106303	---NA---	no GO terms
Bcin02g03520.1	1	6.74387	1085	2012.78	0.0151098	2	26.7571	985	1588.36	4.47019e-06	12	53.0211	781	1233.5	1.27231e-06	96	373.776	989	1639	5.84535e-34	2	23.8785	987	1615.12	2.03343e-05	192	301.84	793	1286.52	5.686e-06	NA	NA	1086	2019.52	NA	0.154633	0.00987867	0.124873
Bcin02g03530.1	1	217.46	1085	2027.66	9.28632e-48	2	55.0711	985	1511.28	6.26244e-12	12	65.9306	781	1154.84	7.65477e-09	96	407.172	989	1620.49	2.1511e-39	2	54.1335	987	1566.35	1.39393e-11	192	290.517	793	1220.77	3.22241e-05	NA	NA	1086	2245.12	NA	0.150447	0.0200018	0.107343
Bcin02g03540.1	1	90.1238	1085	2031.84	1.64184e-20	2	71.253	985	1498.56	2.66491e-15	12	56.0829	781	1154.94	3.8638e-07	96	424.95	989	1606.89	2.42124e-42	2	37.077	987	1569.82	4.33876e-08	192	287.54	793	1211.02	4.96696e-05	NA	NA	1086	2121.97	NA	0.164455	0.0143487	0.111277
Bcin02g03550.1	1	4.3372	1085	1326.3	0.0540785	2	25.7568	985	1114.47	7.18789e-06	12	44.0875	781	897.59	3.68671e-05	96	181.908	989	1144.39	3.58776e-07	2	4.16801	987	1140.22	0.159252	192	172.788	793	941.678	0.933048	NA	NA	1086	1330.64	NA	0.119936	0.00274806	0.113923
Bcin02g03560.1	1	226.827	1085	2020.52	9.35737e-50	2	19.6142	985	1542.89	0.000128692	12	65.7338	781	1161.47	8.27682e-09	96	446.933	989	1573.59	4.93181e-46	2	11.0873	987	1562.5	0.00718944	192	315.684	793	1227.2	5.94274e-07	NA	NA	1086	2247.35	NA	0.165202	0.00409826	0.116688
Bcin02g03570.1	1	13.4049	1085	1769.01	0.000512312	2	1.64236	985	1565.73	0.484479	12	10.978	781	1284.06	0.558598	96	194.969	989	1574.04	1.32918e-08	2	6.66416	987	1567.38	0.05228	192	270.696	793	1295.04	0.000526348	NA	NA	1086	1782.41	NA	0.0982683	0.00335887	0.136436
Bcin02g03580.1	1	3.21285	1085	1771.19	0.100164	2	8.70136	985	1468.23	0.0201728	12	30.7319	781	1181.3	0.00374907	96	283.132	989	1488.06	4.29518e-20	2	11.1294	987	1476.93	0.00704802	192	256.204	793	1212.03	0.00324428	NA	NA	1086	1774.41	NA	0.136867	0.00537999	0.12385
Bcin02g03590.1	1	2.83618	1085	1861.74	0.123826	2	40.6685	985	1514.62	6.0348e-09	12	43.5598	781	1193.9	4.47569e-05	96	270.133	989	1591.61	3.03652e-18	2	36.3224	987	1555.29	6.14955e-08	192	277.157	793	1237.46	0.000221226	NA	NA	1086	1864.58	NA	0.124426	0.0167304	0.127661
Bcin02g03600.1	1	45.5548	1085	1444.23	5.77293e-11	2	15.0114	985	1271.27	0.00109585	12	11.0843	781	1045.89	0.550152	96	128.925	989	1315.31	0.0150911	2	29.0274	987	1286.28	1.85857e-06	192	214.296	793	1056.97	0.180203	NA	NA	1086	1489.79	NA	0.0782437	0.0176165	0.130054
Bcin02g03610.1	1	0.210684	1085	1706.32	0.695446	2	10.7964	985	1447.58	0.0077079	12	13.7084	781	1199.66	0.353949	96	239.4	989	1466.92	4.65885e-14	2	8.54618	987	1458.37	0.0225223	192	234.207	793	1213.37	0.0347214	NA	NA	1086	1706.53	NA	0.122488	0.00437262	0.119831
Bcin02g03620.1	1	11.5117	1085	1375.98	0.00133043	2	3.39848	985	1235.24	0.220003	12	8.28494	781	1015.37	0.777305	96	132.486	989	1243.5	0.00874407	2	4.86103	987	1238.64	0.116935	192	211.58	793	1023.66	0.216544	NA	NA	1086	1387.5	NA	0.0868853	0.00318789	0.138756
Bcin02g03630.1	1	9.17301	1085	1163.97	0.00432848	2	0.929636	985	1037.68	0.662427	12	9.01234	781	875.083	0.72106	96	120.07	989	1043.9	0.0511043	2	5.28944	987	1038.61	0.0965444	192	153.589	793	884.095	1	NA	NA	1086	1173.15	NA	0.0924681	0.00407348	0.118281
Bcin02g03640.1	1	3.27092	1085	1492.82	0.0971203	2	2.27793	985	1287.42	0.365099	12	25.8069	781	1063.75	0.017347	96	201.155	989	1291.66	2.60611e-09	2	1.96791	987	1289.7	0.422424	192	197.864	793	1089.55	0.462359	NA	NA	1086	1496.09	NA	0.118381	0.00115813	0.116445
Bcin02g03650.1	1	0.487822	1085	904.112	0.543042	2	3.58279	985	793.3	0.20226	12	15.2034	781	596.078	0.264128	96	106.445	989	797.667	0.223561	2	0.784181	987	796.883	0.710543	192	182.019	793	611.281	0.791651	NA	NA	1086	904.6	NA	0.1052	0.000775013	0.179891
Bcin02g03660.1	1	103.658	1085	2373.99	2.04599e-23	2	121.993	985	1640.25	6.60942e-26	12	133.46	781	1202.32	2.73324e-21	96	445.375	989	1928.62	9.02518e-46	2	166.372	987	1762.24	7.7823e-35	192	304.473	793	1335.78	3.7623e-06	NA	NA	1086	2477.65	NA	0.144163	0.0538526	0.0985543
Bcin02g03670.1	1	0.909985	1085	1062.07	0.400261	2	8.32047	985	849.055	0.0240483	12	30.4799	781	665.876	0.00406378	96	195.494	989	866.576	1.15923e-08	2	9.20097	987	857.375	0.0167733	192	152.699	793	696.356	1	NA	NA	1086	1062.98	NA	0.154215	0.00725814	0.120456
Bcin02g03770.1	1	2.12485	1085	1805.64	0.186203	2	16.0617	985	1404.88	0.000674526	12	52.8647	781	1128.52	1.35013e-06	96	360.458	989	1445.18	7.76289e-32	2	24.2465	987	1420.94	1.71177e-05	192	223.49	793	1181.39	0.089932	NA	NA	1086	1807.77	NA	0.164407	0.011059	0.101935
Bcin02g03780.1	1	7.16939	1085	1696.44	0.0121212	2	28.7171	985	1380.66	1.77897e-06	12	51.859	781	1089.66	1.98586e-06	96	276.879	989	1419.56	3.36586e-19	2	10.183	987	1409.37	0.0108049	192	239.134	793	1141.52	0.0213498	NA	NA	1086	1703.6	NA	0.139089	0.00511536	0.120128
Bcin02g03780.2	1	1.35881	1085	1614.63	0.296659	2	23.0302	985	1339.51	2.56756e-05	12	23.4239	781	1118.35	0.0345354	96	238.377	989	1376.26	6.34859e-14	2	13.7123	987	1362.54	0.00216271	192	197.742	793	1141.77	0.465049	NA	NA	1086	1615.99	NA	0.127605	0.00734034	0.105853
Bcin02g03790.1	1	10.5357	1085	1771.37	0.00217714	2	11.8279	985	1470.31	0.00481121	12	20.4058	781	1166.77	0.0781788	96	287.274	989	1484.1	1.08235e-20	2	1.95532	987	1482.14	0.424833	192	283.14	793	1187.17	9.47654e-05	NA	NA	1086	1781.91	NA	0.138704	0.000944081	0.136708
Bcin02g03800.1	1	5.80615	1085	1435.15	0.0247401	2	10.4982	985	1278.42	0.00884007	12	21.1586	781	1058.79	0.0642243	96	144.778	989	1290.37	0.00107306	2	1.45569	987	1288.92	0.528114	192	198.47	793	1079.95	0.449733	NA	NA	1086	1440.96	NA	0.0912166	0.000917151	0.125045
Bcin02g03810.1	1	13.9615	1085	1712.7	0.000387192	2	32.3191	985	1528.33	3.2424e-07	12	32.9435	781	1197.81	0.00182149	96	151.973	989	1560.73	0.000273414	2	0.0732165	987	1560.65	0.969064	192	297.576	793	1230.76	1.10791e-05	NA	NA	1086	1726.66	NA	0.0808924	3.89717e-05	0.158394
Bcin02g03820.1	1	7.66592	1085	1523.27	0.00936615	2	20.5329	985	1294.23	8.35038e-05	12	20.908	781	1050.52	0.0686272	96	174.897	989	1348.37	1.91635e-06	2	33.6114	987	1314.76	2.17003e-07	192	222.803	793	1071.43	0.0951514	NA	NA	1086	1530.94	NA	0.100548	0.0193231	0.128088
Bcin02g03830.1	1	21.1235	1085	1696.79	1.06267e-05	2	10.2164	985	1429.92	0.0100571	12	20.2158	781	1166.94	0.0821783	96	221.664	989	1475.12	8.76886e-12	2	34.9919	987	1440.13	1.144e-07	192	242.76	793	1187.16	0.0146197	NA	NA	1086	1717.91	NA	0.11226	0.0177213	0.122943
Bcin02g03850.1	1	5.44254	1085	1211.95	0.0299885	2	28.0728	985	1041.32	2.40985e-06	12	20.1773	781	801.021	0.0829774	96	135.642	989	1076.31	0.00526428	2	6.91051	987	1069.4	0.0468491	192	220.124	793	821.198	0.117487	NA	NA	1086	1217.39	NA	0.0997411	0.00508147	0.161863
Bcin02g03860.1	1	123.502	1085	1653.6	1.18975e-27	2	60.197	985	1265.79	5.28008e-13	12	54.755	781	945.745	6.50253e-07	96	276.089	989	1377.51	4.36016e-19	2	51.5187	987	1325.99	4.75108e-11	192	265.292	793	1000.5	0.00106943	NA	NA	1086	1777.1	NA	0.131177	0.0244778	0.126047
Bcin02g03870.1	1	0.579412	1085	2022.85	0.5065	2	38.3536	985	1466.77	1.81609e-08	12	49.3858	781	1186.07	5.10071e-06	96	510.15	989	1512.7	6.5147e-57	2	7.58507	987	1505.12	0.0345977	192	231.309	793	1235.46	0.0456838	NA	NA	1086	2023.43	NA	0.200754	0.00298487	0.0910248
Bcin02g03880.1	1	65.092	1085	1766.32	3.68884e-15	2	3.65456	985	1514.26	0.195822	12	26.684	781	1223.01	0.0133388	96	240.131	989	1526.19	3.73468e-14	2	8.27894	987	1517.91	0.0253785	192	264.562	793	1249.7	0.00117196	NA	NA	1086	1831.42	NA	0.115457	0.00398059	0.127204
Bcin02g03890.1	1	8.98275	1085	1965.52	0.0047642	2	2.3564	985	1646.84	0.352264	12	54.6147	781	1245.16	6.86102e-07	96	265.336	989	1700.18	1.4225e-17	2	50.9817	987	1649.2	6.08488e-11	192	347.074	793	1299.77	1.89157e-09	NA	NA	1086	1974.5	NA	0.115826	0.0222548	0.151506
Bcin02g03910.1	1	0.346142	1085	1946.77	0.611718	2	30.6045	985	1531.71	7.30154e-07	12	75.2464	781	1162.83	1.74895e-10	96	375.938	989	1570.84	2.62591e-34	2	8.51899	987	1562.32	0.0227819	192	293.631	793	1238.08	2.02409e-05	NA	NA	1086	1947.12	NA	0.161238	0.00365374	0.125937
Bcin02g03920.1	1	61.9083	1085	2126.77	1.78266e-14	2	2.57105	985	1571.21	0.319964	12	81.9125	781	1244.98	1.10958e-11	96	533.858	989	1592.91	4.43632e-61	2	19.1352	987	1573.78	0.000183322	192	244.313	793	1326.89	0.0124678	NA	NA	1086	2188.68	NA	0.19472	0.00697938	0.089111
Bcin02g03930.1	1	2.10908	1085	1824.16	0.187922	2	24.8232	985	1437.34	1.11427e-05	12	14.3153	781	1175.45	0.315332	96	320.779	989	1503.38	1.13812e-25	2	41.2187	987	1462.17	6.19304e-09	192	247.578	793	1189.76	0.00878429	NA	NA	1086	1826.27	NA	0.14659	0.0188362	0.113139
Bcin02g03940.1	1	10.3691	1085	1590.14	0.00236515	2	21.7097	985	1362.83	4.79238e-05	12	31.8386	781	1079.18	0.00262633	96	190.514	989	1399.62	4.20148e-08	2	15.0872	987	1384.54	0.0011613	192	251.81	793	1111.02	0.00543204	NA	NA	1086	1600.51	NA	0.105483	0.00835342	0.139421
Bcin02g03950.1	1	20.4109	1085	2205.31	1.5128e-05	2	52.5208	985	1550.43	2.11326e-11	12	77.6694	781	1199.06	6.37256e-11	96	481.199	989	1724.11	6.94859e-52	2	121.154	987	1602.95	2.10359e-25	192	273.698	793	1276.73	0.00035291	NA	NA	1086	2225.72	NA	0.170151	0.0428399	0.0967791
Bcin02g03960.1	1	3.4906	1085	2048.26	0.0860476	2	8.95949	985	1576.82	0.0179478	12	53.6176	781	1197.33	1.00667e-06	96	436.27	989	1611.99	3.1146e-44	2	26.2135	987	1585.78	6.87578e-06	192	325.868	793	1250.95	1.01813e-07	NA	NA	1086	2051.75	NA	0.17352	0.010426	0.129609
Bcin02g03970.1	1	0.379179	1085	1739.04	0.594736	2	4.47702	985	1457.43	0.135575	12	73.7118	781	1143.29	3.26149e-10	96	257.208	989	1481.84	1.88615e-16	2	19.9278	987	1461.91	0.000127617	192	240.434	793	1217	0.0186952	NA	NA	1086	1739.42	NA	0.127548	0.00988208	0.11923
Bcin02g03970.2	1	2.07939	1085	1820.98	0.191213	2	19.6246	985	1547.83	0.000128061	12	67.7361	781	1208.93	3.68778e-09	96	233.819	989	1587.17	2.4938e-13	2	19.7056	987	1567.46	0.000141137	192	271.168	793	1276.67	0.000494816	NA	NA	1086	1823.06	NA	0.112598	0.00948941	0.130583
Bcin02g03980.1	1	13.8991	1085	1803.1	0.000399115	2	20.7498	985	1604.76	7.53112e-05	12	39.1888	781	1251.09	0.000215346	96	177.011	989	1626.09	1.16568e-06	2	0.579521	987	1625.51	0.776808	192	314.48	793	1290.28	7.26958e-07	NA	NA	1086	1817	NA	0.0887456	0.000290546	0.157667
Bcin02g03990.1	1	0.618719	1085	941.799	0.492654	2	5.19452	985	842.76	0.0977728	12	13.4516	781	682.41	0.370974	96	89.9911	989	851.808	0.655357	2	3.85341	987	847.955	0.182876	192	146.898	793	695.862	1	NA	NA	1086	942.418	NA	0.086842	0.00371857	0.141758
Bcin02g04000.1	1	8.87219	1085	1856.85	0.00504252	2	3.17621	985	1485.92	0.243246	12	56.6646	781	1158.1	3.08762e-07	96	329.902	989	1526.95	4.58977e-27	2	37.8529	987	1489.1	3.01483e-08	192	271.16	793	1214.76	0.000495263	NA	NA	1086	1865.72	NA	0.147708	0.016948	0.121407
Bcin02g04010.1	1	109.398	1085	2007.82	1.22082e-24	2	7.98496	985	1571.08	0.0279807	12	17.7985	781	1287.72	0.14932	96	313.388	989	1694.43	1.49427e-24	2	115.367	987	1579.07	3.28388e-24	192	265.564	793	1305.52	0.00103143	NA	NA	1086	2117.22	NA	0.123092	0.0453136	0.104307
Bcin02g04020.1	1	32.732	1085	1793.8	3.33804e-08	2	0.12287	985	1572.79	0.946326	12	39.0797	781	1290.56	0.00022377	96	211.302	989	1582.5	1.63899e-10	2	9.58862	987	1572.91	0.014076	192	243.15	793	1329.64	0.0140496	NA	NA	1086	1826.53	NA	0.103204	0.00468326	0.118759
Bcin02g04060.1	1	5.88555	1085	1864.81	0.0237318	2	6.42223	985	1557.72	0.0565935	12	42.9835	781	1218.63	5.50005e-05	96	274.632	989	1590.17	7.01459e-19	2	26.0282	987	1564.15	7.49674e-06	192	296.113	793	1261.61	1.38624e-05	NA	NA	1086	1870.69	NA	0.12648	0.0119871	0.136373
Bcin02g04070.1	1	66.0237	1085	1447.44	2.34085e-15	2	23.2814	985	1215.54	2.28665e-05	12	30.294	781	1006.63	0.00430936	96	203.253	989	1244.18	1.48512e-09	2	5.35939	987	1238.83	0.0935962	192	178.622	793	1036.92	0.850586	NA	NA	1086	1513.46	NA	0.118028	0.00311217	0.103725
Bcin02g04080.1	1	2.43833	1085	1501.91	0.154802	2	20.3847	985	1331.22	8.95529e-05	12	29.353	781	1076.45	0.00580949	96	148.784	989	1353.12	0.000507104	2	1.5206	987	1351.6	0.513246	192	225.415	793	1105.8	0.0765856	NA	NA	1086	1504.34	NA	0.0899187	0.000918986	0.136231
Bcin02g04100.1	1	2.05548	1085	800.754	0.19394	2	2.30071	985	633.586	0.36132	12	14.6188	781	493.251	0.297385	96	160.28	989	640.474	5.00308e-05	2	4.58804	987	635.886	0.131931	192	125.716	793	507.87	1	NA	NA	1086	802.809	NA	0.165633	0.00474129	0.129915
Bcin02g04110.1	1	1.60141	1085	1881.92	0.255177	2	10.1508	985	1515.34	0.0103572	12	36.3662	781	1240.01	0.000574007	96	276.01	989	1605.91	4.4729e-19	2	80.4183	987	1525.49	5.73441e-17	192	238.964	793	1276.38	0.0216962	NA	NA	1086	1883.52	NA	0.123221	0.0359019	0.106683
Bcin02g04120.1	1	5.19961	1085	1714.8	0.0340935	2	26.6026	985	1463.26	4.79958e-06	12	78.8152	781	1151.9	3.97037e-11	96	221.642	989	1493.16	8.82561e-12	2	3.29816	987	1489.86	0.23482	192	232.536	793	1230.72	0.0408287	NA	NA	1086	1720	NA	0.113958	0.00169577	0.119559
Bcin02g04130.1	1	14.3737	1085	1565.03	0.000314816	2	4.98379	985	1361.39	0.107708	12	32.094	781	1106.54	0.00241592	96	187.411	989	1377.62	9.19612e-08	2	11.2505	987	1366.37	0.00667217	192	222.755	793	1138.63	0.0954946	NA	NA	1086	1579.41	NA	0.105402	0.0063274	0.125279
Bcin02g04140.1	1	152.11	1085	2260.61	9.16839e-34	2	128.828	985	1678.24	2.45435e-27	12	121.914	781	1180.17	4.37049e-19	96	424.31	989	1836.3	3.09444e-42	2	29.2322	987	1807.06	1.68923e-06	192	376.151	793	1302.09	3.93187e-12	NA	NA	1086	2412.72	NA	0.148036	0.0101987	0.131234
Bcin02g04150.1	1	1.42469	1085	1629.16	0.284667	2	47.2231	985	1326.09	2.65185e-10	12	30.9209	781	1096.38	0.00352799	96	243.508	989	1385.66	1.33635e-14	2	12.3425	987	1373.31	0.00403132	192	198.795	793	1127.3	0.442778	NA	NA	1086	1630.59	NA	0.129084	0.00654275	0.105381
Bcin02g04160.1	1	0.493824	1085	1768.94	0.540242	2	9.53058	985	1521.08	0.0138052	12	28.2815	781	1202.4	0.00816204	96	232.487	989	1536.46	3.70524e-13	2	5.84629	987	1530.61	0.075351	192	290.398	793	1230.68	3.2695e-05	NA	NA	1086	1769.44	NA	0.115794	0.00291184	0.144637
Bcin02g04170.1	1	58.4211	1085	1904.21	9.92707e-14	2	1.37085	985	1403.48	0.545219	12	14.4675	781	1181.73	0.306226	96	431.991	989	1472.22	1.62087e-43	2	67.3741	987	1404.85	2.71304e-14	192	207.277	793	1196.2	0.281975	NA	NA	1086	1962.63	NA	0.175464	0.0273656	0.0841906
Bcin02g04180.1	1	6.00562	1085	1233.39	0.0222884	2	9.34901	985	1103.26	0.0150019	12	23.6061	781	919.823	0.0328247	96	120.625	989	1112.77	0.0476225	2	0.160234	987	1112.61	0.933209	192	159.828	793	943.429	1	NA	NA	1086	1239.4	NA	0.0886829	0.000117803	0.117505
Bcin02g04190.1	1	1.47015	1085	1768.64	0.276737	2	5.97963	985	1460.69	0.0690233	12	20.2628	781	1155.34	0.0811573	96	275.67	989	1492.97	4.99655e-19	2	26.3091	987	1466.66	6.58106e-06	192	285.081	793	1175.6	7.11677e-05	NA	NA	1086	1770.11	NA	0.133039	0.0126969	0.137581
Bcin02g04200.1	1	5.97346	1085	1770.91	0.0226527	2	24.4411	985	1457.6	1.32734e-05	12	17.2932	781	1184.25	0.16773	96	237.636	989	1533.28	7.93286e-14	2	51.239	987	1482.04	5.42158e-11	192	256.056	793	1201.54	0.00329973	NA	NA	1086	1776.89	NA	0.115035	0.0248039	0.123952
Bcin02g04210.1	1	3.19047	1085	827.067	0.101409	2	9.35166	985	696.388	0.0149846	12	18.9111	781	554.17	0.114157	96	112.727	989	714.339	0.120637	2	8.59924	987	705.74	0.0220043	192	123.307	793	573.081	1	NA	NA	1086	830.257	NA	0.118463	0.00903677	0.129581
Bcin02g04220.1	1	87.4865	1085	1984.91	5.99541e-20	2	80.1009	985	1468.23	3.79576e-17	12	52.9744	781	1153.35	1.29516e-06	96	422.992	989	1561.92	5.14503e-42	2	13.5856	987	1548.34	0.00228804	192	261.911	793	1206.32	0.00162774	NA	NA	1086	2072.4	NA	0.168591	0.00541478	0.10439
Bcin02g04230.1	1	58.6484	1085	2050.84	8.87995e-14	2	13.3912	985	1588.46	0.00232773	12	85.9442	781	1237.17	2.08805e-12	96	400.167	989	1650.68	3.04789e-38	2	48.8259	987	1601.85	1.70025e-10	192	265.349	793	1323.11	0.00106098	NA	NA	1086	2109.49	NA	0.156408	0.0190839	0.103713
Bcin02g04240.1	1	0.204014	1085	2039.27	0.700304	2	20.2609	985	1518.92	9.50026e-05	12	85.9529	781	1185.46	2.08159e-12	96	490.053	989	1549.21	2.04745e-53	2	10.0317	987	1539.18	0.0115516	192	247.507	793	1271.41	0.00885084	NA	NA	1086	2039.47	NA	0.192968	0.0039502	0.0974607
Bcin02g04250.1	1	71.5677	1085	1894.56	1.52406e-16	2	17.4439	985	1482.13	0.000355002	12	20.8342	781	1183.48	0.0699398	96	342.503	989	1552.05	5.14479e-29	2	52.4801	987	1499.57	3.0309e-11	192	277.81	793	1204.32	0.000201518	NA	NA	1086	1966.12	NA	0.14506	0.0222269	0.117661
Bcin02g04260.1	1	2.90795	1085	1686.95	0.119012	2	23.6768	985	1470.21	1.90281e-05	12	16.2702	781	1213.8	0.210042	96	187.837	989	1499.11	8.26848e-08	2	5.22248	987	1493.89	0.0995983	192	240.143	793	1230.07	0.0192805	NA	NA	1086	1689.86	NA	0.0997585	0.00277361	0.127538
Bcin02g04270.1	1	64.4336	1085	1864.18	5.10995e-15	2	4.69805	985	1542.77	0.122617	12	45.7021	781	1239	2.03048e-05	96	305.695	989	1558.48	2.11784e-23	2	11.0173	987	1547.47	0.00742934	192	258.063	793	1284.71	0.0025961	NA	NA	1086	1928.61	NA	0.136147	0.00490677	0.114933
Bcin02g04280.1	1	0.0897689	1085	1039.14	0.799611	2	2.99451	985	818.332	0.263809	12	14.0204	781	647.011	0.333577	96	212.666	989	826.478	1.12066e-10	2	5.15138	987	821.326	0.102917	192	157.3	793	661.032	1	NA	NA	1086	1039.23	NA	0.169179	0.00409799	0.125134
Bcin02g04310.1	1	2.61599	1085	2013.24	0.140069	2	25.3278	985	1465.87	8.79021e-06	12	21.2283	781	1183.46	0.063029	96	515.642	989	1497.6	7.12936e-58	2	6.39897	987	1491.2	0.0589952	192	261.178	793	1204.69	0.00177935	NA	NA	1086	2015.85	NA	0.203177	0.00252137	0.102911
Bcin02g04320.1	1	151.801	1085	2053.77	1.0606e-33	2	69.2926	985	1482.55	6.806e-15	12	26.8867	781	1194.31	0.0125413	96	501.29	989	1552.48	2.30076e-55	2	0.634284	987	1551.84	0.758625	192	261.358	793	1221.19	0.001741	NA	NA	1086	2205.57	NA	0.185149	0.00023427	0.0965316
Bcin02g04330.1	1	3.04011	1085	1375.11	0.110481	2	2.15353	985	997.508	0.385546	12	38.7131	781	768.407	0.000254007	96	374.13	989	1000.98	5.12647e-34	2	1.32019	987	999.662	0.560382	192	190.388	793	807.12	0.62316	NA	NA	1086	1378.15	NA	0.213349	0.000752845	0.10857
Bcin02g04340.1	1	4.48957	1085	1467.27	0.0499221	2	4.68601	985	1164.46	0.123339	12	37.1217	781	890.659	0.000442684	96	294.357	989	1172.91	9.99874e-22	2	3.76811	987	1169.14	0.190022	192	236.679	793	927.78	0.0272206	NA	NA	1086	1471.76	NA	0.166314	0.00212901	0.133725
Bcin02g04350.1	1	3.44222	1085	984.56	0.0884293	2	8.39124	985	401.091	0.0232662	12	35.4083	781	229.943	0.000796553	96	564.289	989	420.271	1.71086e-66	2	10.7884	987	409.482	0.00822787	192	135.74	793	265.351	1	NA	NA	1086	988.002	NA	0.361011	0.00690201	0.0868416
Bcin02g04360.1	1	165.598	1085	2159.09	1.16873e-36	2	34.9013	985	1660.52	9.46079e-08	12	91.5513	781	1289.71	1.9441e-13	96	452.758	989	1706.33	5.09049e-47	2	10.9024	987	1695.42	0.00780837	192	279.261	793	1381.26	0.000163982	NA	NA	1086	2324.68	NA	0.162375	0.00391001	0.100153
Bcin02g04370.1	1	1.47927	1085	1079.65	0.2752	2	1.11969	985	964.434	0.609436	12	17.3857	781	803.168	0.164267	96	110.86	989	968.793	0.146488	2	3.23898	987	965.554	0.241174	192	143.88	793	820.554	1	NA	NA	1086	1081.13	NA	0.0927521	0.00270992	0.120378
Bcin02g04380.1	1	8.50166	1085	1928.83	0.0060868	2	22.5661	985	1468.71	3.194e-05	12	50.8275	781	1120.72	2.95777e-06	96	437.395	989	1491.43	2.01169e-44	2	0.152972	987	1491.28	0.935872	192	297.169	793	1171.54	1.18231e-05	NA	NA	1086	1937.33	NA	0.184176	6.44127e-05	0.12513
Bcin02g04390.1	1	20.7263	1085	1270.86	1.29274e-05	2	11.7755	985	1053.03	0.00492558	12	66.906	781	789.425	5.16701e-09	96	196.275	989	1074.58	9.45886e-09	2	9.77396	987	1064.81	0.0129704	192	196.702	793	856.331	0.486447	NA	NA	1086	1291.58	NA	0.131057	0.00652627	0.131342
Bcin02g04410.1	1	11.9836	1085	2109.92	0.00104789	2	137.946	985	1629.62	3.04067e-29	12	134.133	781	1236.45	2.03965e-21	96	339.174	989	1770.75	1.69174e-28	2	3.18444	987	1767.56	0.247193	192	259.03	793	1370.59	0.00230993	NA	NA	1086	2121.9	NA	0.137637	0.00129225	0.105115
Bcin02g04420.1	1	3.91233	1085	828.819	0.0681157	2	10.2625	985	695.944	0.0098474	12	22.0715	781	559.446	0.0501419	96	119.013	989	709.806	0.0583778	2	3.59955	987	706.207	0.205184	192	114.427	793	581.517	1	NA	NA	1086	832.731	NA	0.124576	0.00376781	0.119776
Bcin02g04450.1	1	20.3157	1085	1887.23	1.58498e-05	2	7.69228	985	1580.82	0.0318594	12	21.6132	781	1232.94	0.0568642	96	268.488	989	1618.75	5.17105e-18	2	30.2346	987	1588.51	1.05766e-06	192	326.27	793	1254.55	9.50054e-08	NA	NA	1086	1907.55	NA	0.121693	0.0137039	0.147883
Bcin02g04460.1	1	7.17277	1085	1774.01	0.0121005	2	2.13545	985	1553.89	0.388762	12	14.9527	781	1264.38	0.278188	96	202.503	989	1571.51	1.81638e-09	2	15.4827	987	1556.03	0.00097129	192	274.561	793	1279.33	0.00031339	NA	NA	1086	1781.19	NA	0.101294	0.00774455	0.137337
Bcin02g04470.1	1	4.11395	1085	2021.68	0.0610289	2	3.79292	985	1428.26	0.184303	12	36.3632	781	1145.03	0.000574532	96	573.373	989	1448.3	4.02881e-68	2	16.2544	987	1432.05	0.000681515	192	246.867	793	1181.39	0.00949916	NA	NA	1086	2025.79	NA	0.219228	0.00621484	0.0943891
Bcin02g04480.1	1	8.50465	1085	1593.85	0.00607794	2	4.49907	985	1350.28	0.134309	12	28.1792	781	1091.35	0.00842003	96	233.414	989	1360.43	2.81241e-13	2	5.65304	987	1354.78	0.0820942	192	230.754	793	1119.53	0.0480225	NA	NA	1086	1602.35	NA	0.126758	0.00306994	0.125313
Bcin02g04490.1	1	136.774	1085	2485.13	1.75736e-30	2	65.0426	985	1500.69	5.16345e-14	12	31.626	781	1148.08	0.00281059	96	852.67	989	1632.46	2.85539e-120	2	66.724	987	1565.74	3.6416e-14	192	320.993	793	1179.7	2.39255e-07	NA	NA	1086	2621.9	NA	0.240779	0.0188417	0.0906428
Bcin02g04510.1	1	87.5144	1085	3445.79	5.92501e-20	2	153.524	985	1566.15	1.62391e-32	12	65.6631	781	1124.44	8.5223e-09	96	1611.06	989	1834.73	4.19129e-271	2	115.061	987	1719.67	3.76626e-24	192	376.051	793	1190.1	3.99558e-12	NA	NA	1086	3533.31	NA	0.306318	0.0218772	0.0715003
Bcin02g04520.1	1	4.80537	1085	2086.73	0.0421032	2	70.1583	985	1547.3	4.50694e-15	12	29.8791	781	1214.19	0.00490621	96	464.415	989	1622.31	5.31601e-49	2	4.85231	987	1617.46	0.117396	192	303.231	793	1244.07	4.58319e-06	NA	NA	1086	2091.53	NA	0.181356	0.00189484	0.118413
Bcin02g04530.1	1	6.44079	1085	1261.79	0.017724	2	7.62814	985	1150.12	0.0327871	12	24.4943	781	956.425	0.0255541	96	103.558	989	1158.23	0.285967	2	0.487101	987	1157.74	0.808485	192	169.198	793	980.919	0.970677	NA	NA	1086	1268.23	NA	0.0754644	0.000354959	0.123297
Bcin02g04540.1	1	0.450407	1085	1904.75	0.559583	2	19.1082	985	1563.96	0.000163276	12	24.3012	781	1218.09	0.0269947	96	273.05	989	1631.7	1.17597e-18	2	48.6352	987	1583.07	1.86075e-10	192	321.57	793	1242.39	2.188e-07	NA	NA	1086	1905.2	NA	0.122615	0.02184	0.144403
Bcin02g04550.1	1	24.7553	1085	1511.02	1.732e-06	2	75.7858	985	1173.6	3.02034e-16	12	37.3139	781	917.219	0.000414573	96	255.81	989	1255.21	2.9292e-16	2	5.82269	987	1249.38	0.076111	192	219.065	793	954.533	0.12741	NA	NA	1086	1535.77	NA	0.142322	0.0032395	0.121878
Bcin02g04560.1	1	56.4767	1085	1876.83	2.59564e-13	2	53.3488	985	1510.28	1.42603e-11	12	40.4555	781	1198.72	0.000137075	96	269.774	989	1607.05	3.41201e-18	2	43.4201	987	1563.63	2.1835e-09	192	271.107	793	1239.18	0.000498316	NA	NA	1086	1933.3	NA	0.120087	0.0193279	0.12068
Bcin02g04570.1	1	2.35619	1085	862.771	0.162303	2	3.1128	985	744.403	0.250216	12	16.0535	781	575.059	0.220176	96	113.376	989	749.394	0.112488	2	1.87828	987	747.516	0.438849	192	153.291	793	591.112	1	NA	NA	1086	865.127	NA	0.115645	0.00191586	0.156359
Bcin02g04580.1	1	131.892	1085	1738.42	1.93778e-29	2	15.9538	985	1524.02	0.000709072	12	50.8823	781	1227.78	2.89356e-06	96	198.191	989	1540.23	5.71945e-09	2	0.26078	987	1539.97	0.892461	192	245.357	793	1278.66	0.0111533	NA	NA	1086	1870.31	NA	0.0958016	0.000126056	0.118601
Bcin02g04590.1	1	0.61964	1085	1319.8	0.492324	2	5.98114	985	952.203	0.0689834	12	40.1767	781	734.5	0.000151344	96	354.746	989	965.058	6.19793e-31	2	6.87399	987	958.184	0.0476363	192	177.527	793	774.676	0.868163	NA	NA	1086	1320.42	NA	0.210902	0.00408669	0.105542
Bcin02g04600.1	1	21.9721	1085	1545.04	6.94336e-06	2	7.02871	985	1292.6	0.0430327	12	15.9422	781	1076.96	0.225751	96	240.323	989	1304.72	3.52701e-14	2	5.09654	987	1299.62	0.10544	192	199.692	793	1092.9	0.424387	NA	NA	1086	1567.02	NA	0.132597	0.00281198	0.110179
Bcin02g04610.1	1	109.892	1085	1865.18	9.6064e-25	2	24.7794	985	1372	1.13726e-05	12	34.3536	781	1084.33	0.0011415	96	466.505	989	1398.68	2.34286e-49	2	1.90031	987	1396.78	0.434933	192	253.315	793	1118.68	0.00457633	NA	NA	1086	1975.07	NA	0.190919	0.000777709	0.10367
Bcin02g04620.1	1	286.09	1085	2438.3	1.93159e-62	2	101.963	985	1745.27	1.00598e-21	12	232.871	781	1244.99	1.26582e-40	96	544.817	989	1893.48	5.03413e-63	2	46.2491	987	1847.23	5.79292e-10	192	267.406	793	1477.87	0.000808353	NA	NA	1086	2724.39	NA	0.164326	0.0139496	0.0806542
Bcin02g04670.1	1	70.6432	1085	2299.44	2.41578e-16	2	113.749	985	1671.67	3.51962e-24	12	135.12	781	1271.49	1.31628e-21	96	513.887	989	1785.55	1.44741e-57	2	0.135323	987	1785.42	0.942905	192	265.062	793	1406.61	0.00110168	NA	NA	1086	2370.08	NA	0.178179	4.69203e-05	0.0919045
Bcin02g04680.1	1	2.31003	1085	2137.56	0.166836	2	5.77043	985	1555.44	0.0757408	12	39.0579	781	1165.15	0.000225365	96	556.13	989	1581.43	4.87976e-65	2	20.2188	987	1561.21	0.000111514	192	351.235	793	1204.21	8.1579e-10	NA	NA	1086	2139.87	NA	0.204744	0.00744373	0.12931
Bcin02g04700.1	1	41.3884	1085	1815.51	4.58307e-10	2	22.2303	985	1467.89	3.75019e-05	12	90.982	781	1160.96	2.46705e-13	96	320.839	989	1494.67	1.11486e-25	2	4.54214	987	1490.12	0.134568	192	215.948	793	1251.95	0.160226	NA	NA	1086	1856.89	NA	0.14702	0.00208138	0.0989552
Bcin02g04710.1	1	11.8859	1085	1548.07	0.00110065	2	6.31114	985	1358.97	0.0593681	12	7.53665	781	1133.95	0.83068	96	173.568	989	1374.5	2.61507e-06	2	9.21681	987	1365.28	0.0166499	192	217.486	793	1141.48	0.143412	NA	NA	1086	1559.95	NA	0.099595	0.0052887	0.124796
Bcin02g04720.1	1	12.7257	1085	1391.93	0.000721166	2	0.391875	985	1237.56	0.84044	12	23.9432	781	962.022	0.0298638	96	153.862	989	1238.07	0.000188057	2	0.112859	987	1237.95	0.95221	192	251.596	793	985.965	0.00556238	NA	NA	1086	1404.65	NA	0.0987164	7.24093e-05	0.161421
Bcin02g04730.1	1	3.32668	1085	938.662	0.0941583	2	1.91336	985	783.072	0.430045	12	12.3377	781	596.292	0.451327	96	150.182	989	788.48	0.000387697	2	3.49434	987	784.986	0.214944	192	174.442	793	608.63	0.91117	NA	NA	1086	941.988	NA	0.137069	0.00318925	0.159211
Bcin02g04760.1	1	19.4984	1085	2182.79	2.38762e-05	2	70.1585	985	1474.14	4.50694e-15	12	74.131	781	1107.95	2.75155e-10	96	621.731	989	1561.06	6.75564e-77	2	16.7603	987	1544.3	0.000541863	192	292.062	793	1182.08	2.56255e-05	NA	NA	1086	2202.29	NA	0.218859	0.0058999	0.102811
Bcin02g04770.1	1	72.9222	1085	2054.54	7.81085e-17	2	42.6349	985	1447.1	2.37048e-09	12	17.688	781	1147.68	0.153145	96	562.02	989	1492.52	4.33443e-66	2	2.78024	987	1489.74	0.295707	192	281.727	793	1165.37	0.000115118	NA	NA	1086	2127.46	NA	0.208754	0.00103268	0.104644
Bcin02g04780.1	1	10.0966	1085	1206.11	0.00271689	2	16.4827	985	577.047	0.000554041	12	17.7464	781	428.868	0.151141	96	610.29	989	595.822	8.28576e-75	2	2.29243	987	593.53	0.367016	192	130.433	793	446.614	1	NA	NA	1086	1216.21	NA	0.333712	0.00125352	0.0713217
Bcin02g04810.1	1	32.6912	1085	1432.95	3.40775e-08	2	5.91703	985	1249.26	0.0709261	12	14.1437	781	1035.61	0.325768	96	174.715	989	1258.24	2.00032e-06	2	3.0623	987	1255.17	0.260848	192	199.499	793	1049.76	0.428246	NA	NA	1086	1465.64	NA	0.106312	0.00186337	0.121393
Bcin02g04820.1	1	5.45066	1085	920.472	0.0298691	2	0.438918	985	815.532	0.823441	12	8.17813	781	618.813	0.784925	96	102.325	989	818.147	0.315223	2	2.17658	987	815.97	0.385783	192	188.541	793	626.991	0.660591	NA	NA	1086	925.923	NA	0.099304	0.00211232	0.182974
Bcin02g04830.1	1	0.476779	1085	1733.93	0.547963	2	10.278	985	1474.75	0.00978024	12	17.8655	781	1156.26	0.147145	96	227.201	989	1506.73	1.76057e-12	2	21.7012	987	1485.03	5.57415e-05	192	300.62	793	1174.13	6.88724e-06	NA	NA	1086	1734.41	NA	0.114557	0.0109419	0.151575
Bcin02g04840.1	1	1.07901	1085	1517.18	0.356523	2	1.6368	985	1187.83	0.485653	12	23.8038	781	858.279	0.0310529	96	296.931	989	1220.25	4.20289e-22	2	30.781	987	1189.47	8.18517e-07	192	305.748	793	882.083	3.07592e-06	NA	NA	1086	1518.26	NA	0.160854	0.0166747	0.16563
Bcin02g04870.1	1	9.64337	1085	1951.26	0.00342317	2	0.262876	985	1503.33	0.890258	12	61.8035	781	1204.69	4.01418e-08	96	418.449	989	1532.81	2.92235e-41	2	29.2193	987	1503.6	1.69937e-06	192	236.835	793	1266.5	0.0268216	NA	NA	1086	1960.91	NA	0.173733	0.0121314	0.0983297
Bcin02g04880.1	1	196.878	1085	2422.43	2.43641e-43	2	28.4975	985	1637.57	1.97177e-06	12	119.88	781	1225.54	1.05094e-18	96	677.756	989	1744.67	3.27331e-87	2	78.6031	987	1666.07	1.35796e-16	192	292.148	793	1345.42	2.52847e-05	NA	NA	1086	2619.31	NA	0.200777	0.0232852	0.0865452
Bcin02g04900.1	1	0.0959419	1085	1499.81	0.793308	2	6.55432	985	1332.37	0.0533316	12	19.3284	781	1085.49	0.102865	96	160.301	989	1339.51	4.98138e-05	2	0.585025	987	1338.93	0.775149	192	227.559	793	1104.82	0.0638191	NA	NA	1086	1499.91	NA	0.0965206	0.000352256	0.137018
Bcin02g04910.1	1	12.3141	1085	2041.22	0.000885909	2	123.994	985	1543.73	2.51935e-26	12	60.7927	781	1211.92	5.99594e-08	96	350.714	989	1690.5	2.66949e-30	2	22.7825	987	1667.72	3.37468e-05	192	271.015	793	1272.71	0.000503891	NA	NA	1086	2053.53	NA	0.144503	0.00938701	0.111666
Bcin02g04920.1	1	0.979894	1085	2057.12	0.381039	2	9.07948	985	1462.11	0.0169867	12	17.383	781	1205.53	0.164356	96	368.683	989	1688.44	3.827e-33	2	217.248	987	1471.19	1.5918e-45	192	239.2	793	1222.91	0.0212046	NA	NA	1086	2058.1	NA	0.13944	0.0821655	0.0904681	ubiquitin-conjugating enzyme E2-16 kDa [Botrytis cinerea ]	F:nucleotide binding; F:ATP binding
Bcin02g04930.1	1	8.83787	1085	2002.17	0.00513435	2	24.6141	985	1558.98	1.22481e-05	12	96.9489	781	1215.02	1.99249e-14	96	354.725	989	1647.45	6.24338e-31	2	63.8541	987	1583.6	1.43719e-13	192	247.015	793	1311.97	0.00934158	NA	NA	1086	2011.01	NA	0.146002	0.0262818	0.101669
Bcin02g04940.1	1	39.934	1085	971.554	9.40911e-10	2	12.7155	985	832.977	0.00319145	12	23.7926	781	592.956	0.0311418	96	125.759	989	845.794	0.0238879	2	0.101857	987	845.692	0.956632	192	216.229	793	616.748	0.157086	NA	NA	1086	1011.49	NA	0.110572	8.95564e-05	0.190116
Bcin02g04960.1	1	2.72042	1085	1055.68	0.132205	2	3.41382	985	816.174	0.218605	12	18.3061	781	610.759	0.132373	96	235.073	989	820.606	1.71407e-13	2	1.01892	987	819.587	0.639902	192	187.108	793	629.066	0.691131	NA	NA	1086	1058.4	NA	0.181595	0.000787116	0.144542
Bcin02g04970.1	1	9.13992	1085	1471.18	0.00439996	2	37.6683	985	1224.49	2.51026e-08	12	19.7343	781	986.371	0.0929335	96	195.068	989	1276.11	1.29554e-08	2	13.9525	987	1262.16	0.00194119	192	218.388	793	1006.11	0.134219	NA	NA	1086	1480.32	NA	0.11547	0.00825913	0.129274
Bcin02g04980.1	1	0.151995	1085	1603.46	0.741014	2	20.3849	985	1416.03	8.95529e-05	12	31.1302	781	1182.72	0.00329472	96	149.342	989	1454.12	0.000455799	2	17.7046	987	1436.42	0.000352932	192	202.18	793	1213.85	0.373877	NA	NA	1086	1603.62	NA	0.0843422	0.00999887	0.114183
Bcin02g04990.1	1	9.40426	1085	1502.11	0.00386356	2	14.4448	985	1308.43	0.00142576	12	17.7922	781	1108.76	0.149527	96	163.126	989	1338.98	2.72082e-05	2	16.1128	987	1322.87	0.000727706	192	181.875	793	1126.55	0.79416	NA	NA	1086	1511.51	NA	0.0964811	0.00952999	0.10757
Bcin02g05000.1	1	2.04735	1085	1497.14	0.194844	2	14.3638	985	1290.42	0.00148055	12	13.5734	781	1073.39	0.362639	96	141.039	989	1356.1	0.00209498	2	51.3122	987	1304.79	5.2388e-11	192	203.461	793	1086.96	0.349897	NA	NA	1086	1499.18	NA	0.0833791	0.0303347	0.120282
[truncated: 7,814 more rows]
