# Supplementary material for: Plant–necrotroph co-transcriptome networks illuminate a metabolic battlefield
Source: eLife. 2019 May 13;8:e44279. doi: 10.7554/eLife.44279 (PMC6557632; doi:10.7554/eLife.44279)
Supplement: Supplementary file 1. [file elife-44279-supp1.xlsx]

## Sheet: SF1_BcNetTraits
Supplementary File 1. Topology traits of B. cinerea in planta gene co-expression networks.
Network	Nodes	Average Edge Number	Numb. Of Hubs (≥ 10 degree)	Proportion of Hubs （%）	Average Clustering Coefficient	Network Density	Network Heterogeneity	Max Node Degree	Numb. of Nodes with Max Degree	Exponent of Fitted Power Law Function in Degree Distribution	R2 of Fitted Power Law Function in Degree Distribution
Col-0
Total	511	10.8			0.57	0.042	1.35			-0.771	0.559
Vesicle/virulence Net	242	7.24	106	43.802	0.561	0.06	1.288	117	1	-0.866	0.778
Translation/growth Net	128	30.83	97	75.78	0.763	0.43	0.631	94	1	-0.091	0.021
BOA Net	15	4.93	9	60	0.797	0.705	0.316	13	3	0.318	0.313
Exocytosis regulation Net	13	5.08	11	84.62	0.952	0.846	0.244	12	2	0.569	0.286
Cyclic peptide Net	10	2.7	0	0	0.662	0.6	0.363	8	1	0.195	0.097
Copper transport Net	10	1.5	0	0	0.617	0.333	0.333	4	4	1	1
BOT Net	8	3.75	0	0	0.964	0.964	0.064	7	6	7.127	1
Peptidase Net	6	1.5	0	0	0.9	0.6	0.333	5	1	-0.816	0.455
IPP Net	6	1	0	0	0.389	0.4	0.289	3	1	0.215	0.022
Polyketide Net	5	0.8	0	0	0	0.4	0.75	4	1	-1	1
coi1-1
Total	521	12.6			0.533	0.048	1.558			-0.626	0.422
Vesicle/virulence and Translate/growth Net	336	18.51			0.61	0.111	1.205	126	2	-0.452	0.322
BOT/IPP Net	17	2.88	1	5.88	0.625	0.36	0.537	12	1	0.152	0.04
BOA Net	15	4.67	8	53.33	0.803	0.667	0.368	13	2	0.381	0.361
Exocytosis regulation Net	13	4.85			0.881	0.808	0.208	12	2	0.978	0.217
Peptidase Net	12	2.42	0	0	0.643	0.439	0.546	9	1	0.046	0.007
Copper transport Net	11	1.36	0	0	0.597	0.273	0.386	5	1	-0.106	0.008
Plant cell wall degradation Net	10	3.7	0	0	0.875	0.822	0.183	9	2	1.189	0.504
Cyclic peptide Net	10	0.9	0	0	0	0.2	1.333	9	1	-1	1
Peptidase II Net	8	1.125	0	0	0.262	0.321	0.657	5	1	-0.822	0.924
Siderophores Net	6	1.17	0	0	0.389	0.467	0.474	4	1	-0.314	0.222
26S Proteasome regulation Net	6	1.17	0	0	0.478	0.467	0.589	5	1	-0.504	0.732
Sugar Net	6	0.833	0	0	0	0.333	0.894	5	1	-1	1
ROS/NO stress Net	5	0.8	0	0	0	0.4	0.75	4	1	-1	1
ATP Net	5	0.8	0	0	0	0.4	0.5	3	1	-1.063	0.867
npr1-1
Total	395	10.1			0.51	0.051	1.536			-0.616	0.381
Translation/growth Net	122	28.32			0.738	0.468	0.602	89	1	0.022	0.001
Vesicle/virulence Net	56	1.48	0	0	0.358	0.054	0.598	8	1	-1.284	0.708
Peptidase Net	23	2.739	5	21.74	0.61	0.249	0.841	16	1	-0.494	0.641
Polyketide Net	21	1.619	2	9.52	0.401	0.162	1.09	15	1	-0.855	0.937
BOT/IPP Net	16	3.06			0.678	0.408	0.493	11	1	0.077	0.019
BOA Net	15	5.667	12	80	0.924	0.81	0.259	14	1	0.444	0.145
Exocytosis regulation Net	13	5.46	10	66.67	0.934	0.91	0.116	12	7	1.697	0.067
Copper transport Net	13	2.46	0	0	0.61	0.41	0.468	9	2	0.473	0.469
Cyclic peptide Net	10	4.3	0	0	0.952	0.956	0.057	9	6	3.442	1
Unknown Net	6	1.5	0	0	0.678	0.6	0.43	5	1	0.061	0.015
Sugar Net	5	1.2	0	0	0.6	0.6	0.425	4	1	-0.065	0.013
Peptidase II Net	5	1	0	0	0.333	0.5	0.447	3	2	-0.108	0.022
