# Supplementary material for: Plant–necrotroph co-transcriptome networks illuminate a metabolic battlefield
Source: eLife. 2019 May 13;8:e44279. doi: 10.7554/eLife.44279 (PMC6557632; doi:10.7554/eLife.44279)
Supplement: Supplementary file 2. — A mixed linear model was fitted to test lesion area and B. cinerea pathways responsible for botrydial (BOT), botcinic acid (BOA), and cyclic peptide (CycPep) produced under three Arabidopsis genotypes. The lesion area data used in the model were GLM corrected least square means induced by 96 B. cinerea isolates. Model-corrected means of transcripts from 96 B. cinerea isolates were z-scaled and used in ANOVA. Df is the degrees of freedom for a term within the model. SS is the Sum of Squares variation. MS is the Mean of Squared variation. F value is derived from the F statistic and P-value indicates the statistical significance for a given term within the model. Significance of differences are shown as p<0.001 ‘***’, 0.01‘**’ and 0.05 ‘*’. [file elife-44279-supp2.xlsx]

## Sheet: SF2_ANOVALesBOTBOANET5
Supplementary File 2. ANOVA table of lesion area and B. cinerea pathways. A mixed linear model was fitted to test lesion area and B. cinerea pathways responsible for botrydial (BOT), botcinic acid (BOA), and cyclic peptide (CycPep) produced under three Arabidopsis genotypes. The lesion area data used in the model were GLM corrected least square means induced by 96 B. cinerea isolates. Model-corre…
Source of Variation	Df	SS	MS	F	P-Value
BOT	1	10413.8	10413.8	202.374	1.77311e-34	***
BOAModule1	1	715.918	715.918	13.9126	0.000234425	***
CycPepModule2	1	4.58071	4.58071	0.0890179	0.765664
HostGenotype	2	21918	10959	212.969	8.48931e-56	***
BOT:BOAModule1	1	32.8991	32.8991	0.639334	0.424671
BOT:CycPepModule2	1	313.973	313.973	6.10151	0.0141392	*
BOAModule1:CycPepModule2	1	98.9924	98.9924	1.92374	0.166615
BOT:HostGenotype	2	1271.27	635.633	12.3524	7.44373e-06	***
BOAModule1:HostGenotype	2	87.3457	43.6729	0.848704	0.429133
CycPepModule2:HostGenotype	2	20.8097	10.4048	0.2022	0.817058
BOT:BOAModule1:CycPepModule2	1	110.065	110.065	2.13891	0.144793
BOT:BOAModule1:HostGenotype	2	122.219	61.1096	1.18756	0.306589
BOT:CycPepModule2:Host	2	267.27	133.635	2.59696	0.0764024
BOAModule1:CycPepModule2:HostGenotype	2	158.884	79.442	1.54381	0.215487
BOT:BOAModule1:CycPepModule2:HostGenotype	2	165.189	82.5947	1.60508	0.202827
