# Supplementary material for: Plant–necrotroph co-transcriptome networks illuminate a metabolic battlefield
Source: eLife. 2019 May 13;8:e44279. doi: 10.7554/eLife.44279 (PMC6557632; doi:10.7554/eLife.44279)
Supplement: Supplementary file 3. — Mixed linear models were fitted to individual B. cinerea (Bc) gene co-expression networks (GCNs) and variation of host genotypes and Arabidopsis (At) GCNs. Variation was estimated among host genotypes and first eigenvectors from four individual Arabidopsis GCNs. Df is the degrees of freedom for a term within the model. SS is the Sum of Squares variation. MS is the Mean of Squared variation. F value is derived from the F statistic and P-value indicates the statistical significance for a given term within the model. Significance of difference are shown as p<0.001 ‘***’, 0.01‘**’ and 0.05 ‘*’. [file elife-44279-supp3.xlsx]

## Sheet: SF3_ANOVABcNetsAtNets
Supplementary File 3. ANOVA tables of B. cinerea gene co-expression networks. Mixed linear models were fitted to individual B. cinerea (Bc) gene co-expression networks (GCNs) and variation of host genotypes and Arabidopsis (At) GCNs. Variation was estimated among host genotypes and first eigenvectors from four individual Arabidopsis GCNs. Df is the degrees of freedom for a term within the model. …
Source of Variation	Df	SS	MS	F	P-Value
BcVesicle/ViruNet
HostGenotype	2	2526.77	1263.38	16.5839	1.79e-07	***
AtDefense/Cama	1	4914.6	4914.6	64.512	4.31e-14	***
AtPlastid	1	1252.14	1252.14	16.4364	6.8e-05	***
AtPSI	1	420.355	420.355	5.51784	0.0196353	*
HostGenotype:AtDefense/CamA	2	574.541	287.271	3.77089	0.0244077	*
AtDefense/Cama:AtPSI	1	931.493	931.493	12.2273	0.000560935	***
AtDefense/Cama:AtPlastid:AtCell/Division:AtPSI	1	1007.93	1007.93	13.2307	0.000337077	***
BcTSL/GrowthNet
HostGenotype	2	1251.26	625.631	7.10459	0.00100555	***
AtDefense/Cama	1	909.478	909.478	10.3279	0.00149003	**
AtPlastid	1	934.155	934.155	10.6081	0.00128855	**
HostGenotype:AtDefense/Cama	2	1780.56	890.278	10.1099	6.09e-05	***
BcBOANet
HostGenotype	2	68.4312	34.2156	3.38029	0.0356661	*
AtDefense/Cama	1	78.5781	78.5781	7.76304	0.00575879	**
AtPSI	1	162.212	162.212	16.0255	8.33e-05	***
AtPlastid:AtCell/Division	1	41.1093	41.1093	4.06135	0.0449904	*
HostGenotype:AtPSI	2	61.45	30.725	3.03544	0.0499023	*
AtDefense/Cama:AtPSI	1	370.883	370.883	36.641	5.43e-09	***
BcExocytoReguNet
HostGenotype	2	21.2736	10.6368	1.53914	0.216676
AtDefense/Cama	1	512.32	512.32	74.1326	9.8e-16	***
AtPlastid	1	71.6801	71.6801	10.3721	0.00145625	**
AtCell/Division	1	430.545	430.545	62.2998	1.05e-13	***
AtDefense/Cama:AtPSI	1	80.4962	80.4962	11.6478	0.000754324	***
AtPlastid:AtPSI	1	43.7965	43.7965	6.33734	0.0124747	*
AtDefense/Cama:AtPlastid:AtCell/Division:AtPSI	1	59.6579	59.6579	8.63249	0.00362391	**
BcCycPepNet
HostGenotype	2	26.9018	13.4509	1.35778	0.2592
AtDefense/Cama	1	170.233	170.233	17.1839	4.71e-05	***
AtPSI	1	68.4067	68.4067	6.9052	0.00914854	**
BcCopperTranNet
HostGenotype	2	15.7518	7.8759	1.19372	0.304885
AtDefense/Cama	1	627.984	627.984	95.1809	3.73e-19	***
AtCell/Division	1	45.2361	45.2361	6.85624	0.0093953	**
AtPSI	1	44.4612	44.4612	6.7388	0.0100156	**
AtDefense/Cama:AtPSI	1	49.3771	49.3771	7.48389	0.00669035	**
HostGenotype:AtPlastid:AtCell/Division	2	54.1116	27.0558	4.10073	0.0177349	*
BcBOTNet
HostGenotype	2	6.13452	3.06726	0.822177	0.440708
AtDefense/Cama	1	1151.19	1151.19	308.577	5.65e-45	***
HostGenotype:AtDefense/Cama:AtPlastid:AtCell/Division:AtPSI	2	23.0957	11.5479	3.0954	0.0470686	*
BcPeptidaseNet
HostGenotype	2	26.2332	13.1166	2.40392	0.0925356
AtDefense/Cama	1	60.4881	60.4881	11.0859	0.00100682	***
AtCell/Division	1	32.0002	32.0002	5.86479	0.0161888	*
AtPSI	1	92.6782	92.6782	16.9854	5.19e-05	***
AtDefense/Cama:AtPSI	1	93.3623	93.3623	17.1108	4.88e-05	***
HostGenotype:AtPlastidNet:AtCell/Division	2	39.9234	19.9617	3.65845	0.0272203	*
BcIPPNet
HostGenotype	2	44.2538	22.1269	10.029	6.56e-05	***
AtDefense/Cama	1	702.433	702.433	318.378	6.7e-46	***
AtCell/Division	1	16.0198	16.0198	7.26097	0.00754483	**
AtCell/DivisionNet:AtPSI	1	10.1913	10.1913	4.6192	0.0326163	*
HostGenotype:AtCell/Division:AtPSI	2	19.6057	9.80286	4.44315	0.0127417	*
HostGenotype:AtDefense/Cama:AtPlastid:AtPSI	2	21.2303	10.6152	4.81133	0.00893854	**
AtDefense/Cama:AtPlastid:AtCell/Division:AtPSI	1	8.67076	8.67076	3.93003	0.0485716	*
HostGenotype:AtDefense/Cama:AtPlastid:AtCell/Division:AtPSI	2	13.8928	6.94638	3.14845	0.0446966	*
BcPolyketideNet
HostGenotype	2	52.8972	26.4486	13.522	2.73e-06	***
AtDefense/Cama	1	444.537	444.537	227.273	1.39e-36	***
HostGenotype:AtPlastid	2	15.7881	7.89405	4.03589	0.0188828	*
