# Supplementary material for: Plant–necrotroph co-transcriptome networks illuminate a metabolic battlefield
Source: eLife. 2019 May 13;8:e44279. doi: 10.7554/eLife.44279 (PMC6557632; doi:10.7554/eLife.44279)
Supplement: Supplementary file 4. — Linear mixed models were fitted to individual Arabidopsis (At) gene co-expression networks (GCNs) and variation of host genotypes and ten B. cinerea (Bc) GCNs. Variation was estimated among host genotypes and first eigenvectors from individual B. cinerea GCNs. Df is the degrees of freedom for a term within the model. SS is the Sum of Squares variation. MS is the Mean of Squared variation. F value is derived from the F statistic and P-value indicates the statistical significance for a given term within the model. Significance of difference are shown as p<0.001 ‘***’, 0.01‘**’ and 0.05 ‘*’. [file elife-44279-supp4.xlsx]

## Sheet: SF4_ANOVAAtNetsBcNets
Supplementary File 4. ANOVA tables of Arabidopsis gene co-expression networks. Linear mixed models were fitted to individual Arabidopsis (At) gene co-expression networks (GCNs) and variation of host genotypes and ten B. cinerea (Bc) GCNs. Variation was estimated among host genotypes and first eigenvectors from individual B. cinerea GCNs. Df is the degrees of freedom for a term within the model. S…
Source of Variation	Df	SS	MS	F	P-Value
AtDefense/CamaNet
HostGenotype	2	2657.46	1328.73	42.1282	1.1e-16	***
BcVesicle/Viru	1	5401.21	5401.21	171.249	9.52e-31	***
BcTSL/Growth	1	347.539	347.539	11.0189	0.00102362	**
BcBOA	1	475.652	475.652	15.0808	0.000129071	***
BcExocytoRegu	1	1557.49	1557.49	49.3812	1.66e-11	***
BcCycPep	1	3798.5	3798.5	120.434	1.77e-23	***
BcCopperTran	1	3085.76	3085.76	97.8359	6.2e-20	***
BcBOT	1	5266.17	5266.17	166.967	3.61e-30	***
BcPeptidase	1	1155.36	1155.36	36.6313	4.66e-09	***
BcIPP	1	308.019	308.019	9.76592	0.00196801	**
BcPolyketide	1	3198.23	3198.23	101.402	1.65e-20	***
AtPlastidNet
HostGenotype	2	4076.33	2038.16	172.129	3.36e-49	***
BcVesicle/Viru	1	254.598	254.598	21.5016	5.47e-06	***
BcTSL/Growth	1	92.4869	92.4869	7.81082	0.00555895	**
AtCell/DivisionNet
HostGenotype	2	5054.28	2527.14	123.363	5.75e-39	***
BcExocytoRegu	1	1467.03	1467.03	71.6135	1.58e-15	***
AtPSINet
HostGenotype	2	853.64	426.82	11.5235	1.56e-05	***
BcVesicle/Viru	1	1192.92	1192.92	32.2072	3.51e-08	***
BcTSL/Growth	1	270.566	270.566	7.30488	0.00730468	**
BcExocytoRegu	1	928.547	928.547	25.0694	9.89e-07	***
BcCycPep	1	2556.99	2556.99	69.0352	4.47e-15	***
BcCopperTran	1	664.996	664.996	17.9539	3.09e-05	***
BcBOT	1	2963.12	2963.12	80.0001	5.65e-17	***
BcPeptidase	1	1370.7	1370.7	37.0068	3.93e-09	***
BcPolyketide	1	1152.8	1152.8	31.124	5.79e-08	***
