# Supplementary material for: Plant–necrotroph co-transcriptome networks illuminate a metabolic battlefield
Source: eLife. 2019 May 13;8:e44279. doi: 10.7554/eLife.44279 (PMC6557632; doi:10.7554/eLife.44279)
Supplement: Supplementary file 5. — Three Arabidopsis genotypes are wild-type Col-0, jasmonate insensitive mutant coi1-1, and salicylic acid insensitive mutant npr1-1. [file elife-44279-supp5.xlsx]

## Sheet: SF5_AtBcNetTraits
Supplementary File 5. Topology traits of cross-kingdom Arabidopsis-B. cinerea gene co-expression networks. Three Arabidopsis genotypes are wild-type Col-0, jasmonate insensitive mutant coi1-1, and salicylic acid insensitive mutant npr1-1.
Network	Arabidopsis Nodes	B. cinerea Nodes	Average Edge Number	Numb. of B. cinerea Hubs (≥ 20 edges)	Proportion of Hubs (%)	Network Density	Network Heterogeneity	Max Node Degree	Numb. of Nodes with Max Degree	Exponent of Fitted Power Law Function in Degree Distribution	R2 of Fitted Power Law Function in Degree Distribution
Col-0	862	66	2.507	19	2.05	0.005	5.094	541	1	-1.001	0.71
coi1-1	495	37	1.908	8	1.5	0.007	4.45	268	1	-0.97	0.706
npr1-1	1596	66	5.594	112	6.74	0.007	4.8	1005	1	-0.978	0.766
