# Supplementary material for: Plant–necrotroph co-transcriptome networks illuminate a metabolic battlefield
Source: eLife. 2019 May 13;8:e44279. doi: 10.7554/eLife.44279 (PMC6557632; doi:10.7554/eLife.44279)
Supplement: Supplementary file 6. — To test if germination may influence the observed network to lesion connections, we estimated germination using the first principal component of genes linked to germination in Leroch et al. (2013). We then estimated the value of this principal component in the isolates grown on the three host genotypes and conducted a linear model to compare how this eigengene links to virulence. Using a linear model with and without this germination eigengene, we compared the link of the 10 B. cinerea transcript networks to lesion size with and without the germination eigengene vector in the model. [file elife-44279-supp6.xlsx]

## Sheet: SF6_ANOVAGermination
Supplementary File 6. Analysis of potential impact of germination variation. To test if germination may influence the observed network to lesion connections, we estimated germination using the first principal component of genes linked to germination in Leroch et al., 2013. We then estimated the value of this principal component in the isolates grown on the three host genotypes and conducted a lin…
Analysis with the B. cinerea germination PC1
Source of Variation	Df	Sum Sq	Mean Sq	F value	Pr(>F)
HostGenotype	2	21918	10959	208.655	< 2e-16
GerminationPC1	1	5706	5706	108.645	< 2e-16
BcVesicle/ViruNetPC1	1	274	274	5.216	0.023144
BcTSL/GrowthNetPC1	1	385	385	7.328	0.007217
BcBOANetPC1	1	587	587	11.176	0.000944
BcExocytoReguNetPC1	1	390	390	7.42	0.006863
BcCycPepNetPC1	1	882	882	16.802	5.47e-05
BcCopperTranNetPC1	1	306	306	5.829	0.016423
BcBOTPC1	1	4271	4271	81.313	< 2e-16
BcPeptidaseNetPC1	1	3	3	0.051	0.821439
BcIPPNetPC1	1	165	165	3.134	0.077785
BcPolyketideNetPC1	1	9	9	0.166	0.684247
Residuals	274	14391	53
Analysis without the B. cinerea germination PC1
Source of Variation	Df	Sum Sq	Mean Sq	F value	Pr(>F)
HostGenotype	2	21918	10959	209.407	< 2e-16
BcVesicle/ViruNetPC1	1	2563	2563	48.965	1.99e-11
BcTSL/GrowthNetPC1	1	1844	1844	35.234	8.78e-09
BcBOANetPC1	1	201	201	3.838	0.051118
BcExocytoReguNetPC1	1	1081	1081	20.662	8.22e-06
BcCycPepNetPC1	1	1479	1479	28.264	2.19e-07
BcCopperTranNetPC1	1	637	637	12.166	0.000567
BcBOTPC1	1	4992	4992	95.383	< 2e-16
BcPeptidaseNetPC1	1	4	4	0.082	0.774845
BcIPPNetPC1	1	159	159	3.041	0.082311
BcPolyketideNetPC1	1	17	17	0.322	0.570765
Residuals	275	14392	52
